# Supplementary material for: A Proteogenomic Atlas of Clear Cell Renal Cell Carcinoma in a Chinese Population
Source: Research Square preprint supplement (doi:10.21203/rs.3.rs-221123/v1), 2021-02-26
Supplement: Supplementary file 1 [file 041f1ab8f27287c2a10f999a.xlsx]

## Sheet: Description
Table S3: Expression matrix of 232 pairs of Chinese ccRCC samples.
Matrix	expression matrix of all identified proteins in 232 pairs of tumor and tumor adjacent samples
Matrix MBR	expression matrix after match between runs

## Sheet: Matrix
GeneID	Symbol	Description	ccRCC_80_T	ccRCC_80_TA	ccRCC_196_T	ccRCC_196_TA	ccRCC_132_T	ccRCC_132_TA	ccRCC_36_T	ccRCC_36_TA	ccRCC_109_T	ccRCC_109_TA	ccRCC_19_T	ccRCC_19_TA	ccRCC_225_T	ccRCC_225_TA	ccRCC_155_T	ccRCC_155_TA	ccRCC_156_T	ccRCC_156_TA	ccRCC_214_T	ccRCC_214_TA	ccRCC_230_T	ccRCC_230_TA	ccRCC_208_T	ccRCC_208_TA	ccRCC_216_T	ccRCC_216_TA	ccRCC_161_T	ccRCC_161_TA	ccRCC_158_T	ccRCC_158_TA	ccRCC_157_T	ccRCC_157_TA	ccRCC_146_T	ccRCC_146_TA	ccRCC_145_T	ccRCC_145_TA	ccRCC_138_T	ccRCC_138_TA	ccRCC_144_T	ccRCC_144_TA	ccRCC_192_T	ccRCC_192_TA	ccRCC_39_T	ccRCC_39_TA	ccRCC_97_T	ccRCC_97_TA	ccRCC_98_T
284361	EMC10	ER membrane protein complex subunit 10	0.0283	0.0078	0.1164	0.063	0.1439	0.0347	0.0747	0.3773	0.2277	0.3717	0.8792	0.723	0	0.0559	0.0361	0.7776	0.3404	0.0082	0.1691	0.1946	0.064	0.1148	0	0.0734	0	0.3767	0.0263	0.057	0.0188	0.1104	0.0369	0	0.028	0.1718	0.0261	0.1345	0.1053	0.1117	0.065	0.1241	0.046	0.0941	0	0.5383	0.0728	0.1003	0
4259	MGST3	microsomal glutathione S-transferase 3	5.8964	15.2371	11.2307	6.0262	19.622	9.7259	19.2992	57.3803	33.5976	10.3651	34.9156	27.0883	3.0723	14.4616	5.3044	23.3768	6.4042	7.2133	2.4317	3.2742	8.1981	11.3848	2.4863	9.0396	6.6926	6.4824	8.5347	6.3127	8.244	32.7701	4.3377	24.9119	36.1027	33.7936	20.5165	9.4519	30.9329	15.9659	34.6007	8.2545	26.8123	9.7862	38.2393	10.4564	9.4358	24.8985	10.6629
4644	MYO5A	myosin VA (heavy chain 12, myoxin)	0.1565	0.0238	0.3466	0.0012	0.1652	0.0067	0.1078	0.0214	1.3013	0.0538	0.726	0.0091	0.0245	0.0044	0.0122	0	0.2072	0.1103	0.0092	0.1727	0.266	0.7739	0.0148	0.7045	0.0278	0.008	0.0098	0.0255	0.0076	0.0029	0.1415	0.0212	0.0133	0.0105	0.019	0.0054	0.016	0.0105	0.0134	0.0078	0.0031	0.0037	0.0017	0.0146	0.009	0.5367	0.041
10477	UBE2E3	ubiquitin-conjugating enzyme E2E 3	0.1076	0	0	0.0247	0.0535	0.0816	0	0.0469	0.1535	0	0	0.0384	0	0.0821	0	0	0	0	0.0354	0.0169	0.0789	0	0.0267	0.0759	0	0	0.1142	0.0792	0.0809	0.0607	0.1132	0.1038	0.0409	0.0968	0.1273	0.1071	0.0958	0.04	0.0922	0.0131	0.0529	0	0.0841	0.0221	0.0968	0.0131	0.0471
70	ACTC1	actin, alpha, cardiac muscle 1	563.165	96.9065	259.611	355.488	379.615	194.132	301.527	480.042	420.184	499.557	306.207	222.354	14.1599	252	451.536	350.714	259.455	125.053	136.288	122.373	305.096	293.987	56.7471	316.624	329.863	158.514	172.528	282.362	103.844	198.769	195.746	250.615	79.2923	266.01	107.408	131.653	125.349	395.24	151.988	136.435	254.446	130.642	189.911	144.74	156.877	383.129	113.623
84876	ORAI1	ORAI calcium release-activated calcium modulator 1	0.1226	0	0.2942	0	0	0	0	0	0	0	0	0	0	0	0	0	0.0762	0	0	0	0.1292	0	0	0	0	0	0	0	0	0	0	0	0	0	0	0	0	0	0	0	0	0	0	0	0	0	0
10000	AKT3	v-akt murine thymoma viral oncogene homolog 3	0.0446	0.0184	0.0166	0.0407	0.0508	0.0486	0.0309	0.044	0.1294	0.0471	0.0217	0.0613	0	0.1027	0.2934	0.1383	0.0446	0.0072	0.4035	0.0195	0.298	0.0208	0.0442	0.2892	0.2148	0.0555	0.018	0.0244	0.0482	0.0205	0.1123	0.0305	0.0086	0.0555	0.0773	0.0065	0.1142	0.0331	0.0323	0.0305	0	0.0119	0.0244	0.0151	0.0209	0.1456	0.0365
9738	CCP110	centriolar coiled coil protein 110kDa	0.0102	0	0	0	0	0	0	0	0	0	0	0	0	0	0	0	0	0	0	0	0	0	0	0	0	0	0	0	0	0	0	0	0	0	0	0	0	0	0	0	0	0	0	0	0	0	0
5159	PDGFRB	platelet-derived growth factor receptor, beta polypeptide	0.0465	0.1037	0.0697	0.1066	0.1711	0.2257	0.0305	0.184	0.0175	0.5939	0.1437	0.2429	0	0.09	0.732	0.3561	0.1136	0.2297	0.0521	0.0103	0.3305	0.2141	0.0983	0.0501	0.2962	0.0658	0.0262	0.1316	0.0408	0.1058	0.1789	0.1573	0.003	1.3091	0.073	1.975	0.1263	0.4233	0.1195	0.1114	0.0366	0.0226	0.0435	0.0426	0.0388	0.6191	0.0224
9942	XYLB	xylulokinase homolog (H. influenzae)	0.1328	2.7216	0	0.255	0.2518	8.6424	0.0357	0.092	0.1474	0.909	0.0564	1.8666	0	5.728	0.0895	1.7366	0.4405	0.0638	0.1098	0.0031	0.1284	0.5258	0.0052	1.2478	0.0374	0.5526	0.0698	2.2436	0.133	5.4783	0.5678	4.4912	0.0256	6.7023	0.6012	1.6722	0.8226	2.6014	0.6191	1.8745	0.669	0.4043	0.141	0.8099	0.028	1.986	0.3878
9620	CELSR1	cadherin, EGF LAG seven-pass G-type receptor 1	0.0063	0.01	0.0203	0.0115	0.0162	0.0695	0.0762	0.027	0.0461	0.0222	0.0284	0.0264	0	0.0203	0.0116	0.0168	0.016	0.0184	0.0118	0.0004	0.0123	0.0217	0.0026	0.0088	0.0231	0.0148	0.0818	0.7066	0.0782	0.0099	0.0145	0.1008	0.0015	0.0369	0	0.0486	0.0093	0.0113	0.0042	0.0331	0.0019	0.0038	0.006	0.0154	0.0133	0.0292	0.0028
56954	NIT2	nitrilase family, member 2	43.4389	19.4575	10.4833	28.9685	11.7528	28.846	23.0025	18.5524	32.3122	32.1968	44.0501	29.8115	1.4962	26.5467	12.7661	29.2079	10.3933	2.7835	3.7096	0.6585	11.523	32.0064	3.1494	33.1648	5.6543	9.3615	10.7622	25.5548	4.276	47.8469	14.6959	37.591	6.0333	28.5501	11.2115	29.3315	23.3167	38.816	9.8721	11.9926	26.2986	6.6175	8.2341	23.7077	7.0249	11.7597	8.607
1	A1BG	alpha-1-B glycoprotein	4.8459	8.4053	11.7531	4.5087	4.8076	7.3945	4.364	7.1541	8.3334	2.5536	3.5533	4.107	3.1719	4.9759	3.9803	2.4154	18.006	2.9832	11.4893	5.6817	16.5672	7.0315	2.4843	2.4336	6.525	2.8285	18.4291	8.0074	5.8645	3.2502	9.5669	19.3142	5.7702	7.3412	8.7756	5.781	7.5188	12.3902	5.4226	11.331	16.5752	5.0074	5.9834	2.1437	10.3712	5.6423	23.3061
5518	PPP2R1A	protein phosphatase 2, regulatory subunit A, alpha	8.1584	2.427	2.6048	3.2226	8.2777	6.0166	4.8756	4.0836	4.2261	4.3927	0.9964	3.7533	0.5108	4.2183	2.8267	6.1787	2.6107	1.3324	1.7719	0.7717	4.336	5.605	0.5374	3.6361	2.8143	2.1265	2.5431	3.6412	2.9329	6.339	4.9355	5.3758	2.3195	6.1051	4.1082	3.447	4.5522	4.629	5.3437	3.3431	2.2635	2.5898	3.8729	2.8632	4.1903	3.7283	1.9771
1657	DMXL1	Dmx-like 1	0.2134	0.1437	0.0024	0.2765	0.1548	0.2215	0.2252	0.0162	0.0631	0.2334	0.0533	0.331	0	0.2628	0.0482	0.1516	0.089	0.0291	0.0107	0.0044	0.0719	0.289	0	0.3662	0.0379	0.1571	0.0056	0.0598	0.0166	0.2273	0.0164	0.1157	0.0166	0.142	0.0058	0.1593	0.0102	0.2558	0.0066	0.1012	0.1192	0.0783	0.1719	0.2659	0.0235	0.055	0.1224
340156	MYLK4	myosin light chain kinase family, member 4	0.1565	0.1012	0.043	0.3175	0.4176	0.3427	0.1584	0.1222	0.1619	0.5565	0.0208	0.4467	0	0.1352	0	0.2336	0.1011	0.0853	0.0474	0.0889	0.1318	0.2275	0.0595	0.1943	0.1278	0.2536	0.0178	0.1242	0.0371	0.1649	0.1834	0.1508	0.1074	0.3898	0.2559	0.2027	0.3279	0.1503	0.2575	0.1416	0.1176	0	0.0728	0.1618	0.0638	0.1763	0.0086
10845	CLPX	ClpX caseinolytic peptidase X homolog (E. coli)	0.3795	2.2282	1.5405	2.2136	1.2292	0.3202	1.3491	0.6704	1.3564	2.7939	0.0036	1.9995	0.086	2.5324	0.5197	2.9528	0.5258	0.2582	0.435	0.1705	0.5694	4.8024	0.1834	1.8511	0.5999	1.3402	0.2121	0.4769	0.7085	1.6424	0.4843	0.5198	0.2842	0.2091	0.4947	1.1966	0.2499	1.1809	0.4013	0.7523	1.4388	0.8815	1.04	2.3003	0.0738	1.0868	0.3717
4133	MAP2	microtubule-associated protein 2	0.0111	0	0.0355	0	0.039	0.0534	0	0.0127	0.0259	0.0689	0	0	0.0069	0	0.013	0.0238	0.0617	0.0162	0	0.0125	0.0334	0.0234	0.0023	0	0.0102	0	0	0	0.0409	0	0.0271	0	0.0905	0.0289	0.0104	0.011	0.0364	0.0068	0.1573	0.0088	0.2197	0	0.0567	0	0	0.0213	0
64601	VPS16	vacuolar protein sorting 16 homolog (S. cerevisiae)	0.4974	0.3418	1.4499	0.3659	0.5626	0.4482	0.6579	0.5281	1.419	1.1645	0.7936	0.4648	0.0395	0.7661	0.1637	0.5595	0.2317	0.0516	0.1356	0.0717	0.2102	0.4667	0.0539	0.2222	0.1829	0.1771	0.3311	0.6923	0.1868	0.3488	0.5475	0.1796	0.1716	0.3905	0.3679	0.4191	0.2305	0.4285	0.3339	0.3053	0.3003	0.2164	0.2163	0.3162	0.507	0.1463	0.1175
376497	SLC27A1	solute carrier family 27 (fatty acid transporter), member 1	0.1768	0.1419	0.2056	0.1111	0.1559	0.116	0.381	0.4431	0.3726	0.0874	0.0707	0.2667	0.0366	0.4583	0.2084	0.1043	0.1491	0.1595	0.2887	0.0008	0.2382	0.3621	0.0813	0.0912	0.1759	0.1363	0.1172	0.0823	0.0907	0.0548	0.091	0.0581	0.0484	0.1061	0.1852	0.0573	0.1374	0.1272	0.1584	0.1107	0.2351	0.0066	0.3496	0.1355	0.3078	0.1835	0.1918
2534	FYN	FYN oncogene related to SRC, FGR, YES	0.0699	0.0518	0.3171	0.0193	0.105	0.0539	0.1677	0.0888	0.1674	0.1435	0.1315	0.0541	0.0142	0.0909	0.1153	0.0586	0.1209	0.0291	0.058	0.0252	0.3347	0.0852	0.1568	0.0442	0.0986	0.0387	0.1002	0.0388	0.0956	0.0573	0.1016	0.0422	0.042	0.0876	0.1567	0.0652	0.1175	0.0594	0.0647	0.082	0.1245	0.0494	0.0764	0.0596	0.1021	0.0457	0.013
64149	C17orf75	chromosome 17 open reading frame 75	0.3208	0.1314	0.0565	0.1968	0.0387	0.0715	0.3777	0.1303	0.1458	0.1262	0	0.2058	0.1003	0.0624	0.2569	1.1653	0.1095	0.3988	0.1583	0.0887	0.0385	0.3915	0.0466	0.4785	0.1301	0.1974	1.9113	1.2814	1.7311	0.1448	2.243	1.4846	0.7358	0.938	3.1336	0.055	0.3601	0.0912	0.0978	0.0486	0.1115	0.0367	0.1451	0.0093	0	0.1382	0.0929
3425	IDUA	iduronidase, alpha-L-	0.4043	0	0	0	0	0	0	0.0196	0	0	0.0118	0	0	0	0.0064	0	0	0.0172	0	0.1076	0.0104	0	0	0.0046	0	0	0	0	0	0	0	0.0323	0	0	0	0	0	0	0	0.0016	0	0	0.0076	0.0062	0.0177	0.0245	0
56851	EMC7	ER membrane protein complex subunit 7	1.1364	0.4296	0.3163	1.0462	0.2376	0.419	0.8485	0.8171	0.7401	1.9055	1.7085	0.8956	0.1197	1.2894	0.2343	1.0568	0.2471	0.2548	0.595	0.3359	0.227	1.4948	0.1831	1.2057	0.2873	0.7124	0.8167	1.0807	0.1148	0.6233	0.1	0.7841	0.1463	0.6147	0.115	0.7832	0.1073	0.507	0.1708	0.2698	0.713	0.4791	0.8105	0.8549	0.4043	0.7303	0.2395
11100	HNRNPUL1	heterogeneous nuclear ribonucleoprotein U-like 1	2.5575	0.2952	1.104	0.5793	1.2399	0.3683	3.1287	1.2603	1.6853	0.9161	1.6116	0.6772	0.1218	0.3195	1.2287	1.3463	0.9072	0.4857	0.7183	0.2915	1.3218	0.6836	0.3566	0.3848	0.747	0.3059	0.8012	0.4191	0.798	0.8838	1.3202	0.6152	0.5573	0.8232	1.3961	0.5616	1.1258	0.3949	0.9783	0.4401	1.8835	0.1132	1.9191	0.4116	0.9199	0.9692	0.5591
132	ADK	adenosine kinase	1.3906	0.5412	0.2274	2.8102	0.5141	0.2952	0.531	1.3709	0.7084	0.8579	0.8856	1.8452	0.0671	0.651	0.7904	3.8304	0.5165	1.4347	0.8258	0.541	0.6513	3.0122	0.3408	0.7546	0.2723	0.378	0.4586	1.1792	0.4764	1.4669	0.8386	1.2482	0.0873	1.0766	0.8639	0.5164	1.1211	0.7301	0.6241	0.5081	0.4603	0.2094	0.989	0.439	0.895	1.4062	0.1734
23352	UBR4	ubiquitin protein ligase E3 component n-recognin 4	0.1761	0.1359	0.1373	0.1378	0.2121	0.1958	0.2202	0.3178	0.3142	0.1545	0.3245	0.3259	0.0224	0.2877	0.2174	0.3505	0.0595	0.1377	0.0961	0.028	0.1575	0.3422	0.0119	0.3334	0.0739	0.1324	0.0754	0.2221	0.0732	0.5483	0.1078	0.1246	0.1093	0.1565	0.2162	0.2293	0.1632	0.4438	0.3159	0.0974	0.1743	0.1727	0.2106	0.0813	0.182	0.234	0.1397
2168	FABP1	fatty acid binding protein 1, liver	0.9486	388.575	0.2272	304.913	0	141.527	0	43.4427	0	100.907	0.3636	427.868	0	257.46	1.1749	101.361	0	0.5675	0	0.3282	0	274.762	0.2743	373.568	0	244.71	0.1692	61.6686	0	450.657	0	439.828	0	29.6369	1.0983	166.74	0	133.461	0	38.6256	0	19.8954	0	367.191	0	55.6757	0
113146	AHNAK2	AHNAK nucleoprotein 2	0.0022	0	1.0253	0	0.3981	0	0.3403	0.0009	0.7971	0	0.0318	0	0.1409	0	0.1946	0	0.1756	0	0.8616	0	0.0904	0	0.0852	0	0.1775	0	0.5099	0	1.7058	0	0.4083	0	0.3385	0	0.2292	0	0.1841	0	0.2585	0.0026	0.2793	0	0.6867	0	0.0106	0	0.1525
127700	OSCP1	organic solute carrier partner 1	0.0317	0.0459	0.0153	0.0083	0.1019	0	0.3075	0.2494	0.0212	0.0515	0.0487	0.1052	0.0061	0.0999	0.1484	0.1011	0.1606	0	0.0301	0	0.1658	0.0292	0.05	0.0155	0.055	0.0151	0.0629	0.0355	0.0633	0.0614	0.0446	0	0.0461	0.0308	0.1597	0.0313	0.135	0.0389	0.128	0.0121	0.0262	0.1057	0.1929	0.008	0.498	0.0287	0.1382
84313	VPS25	vacuolar protein sorting 25 homolog (S. cerevisiae)	1.3519	1.2769	2.6564	1.7743	2.4161	1.2222	0.8558	0.868	1.269	1.409	1.1511	1.7043	1.2821	0.9831	0.6359	1.3669	0.5694	0.3949	0.7376	0.2383	1.3843	4.2512	0.518	2.3602	2.1846	2.1856	0.8704	1.1496	0.7665	2.6742	1.1463	0.8034	0.6735	2.5475	2.85	2.9089	2.4973	2.296	3.477	2.2698	0.9498	0.4201	1.095	1.1415	3.8354	3.8063	2.6132
176	ACAN	aggrecan	0.8907	0.0123	0.3405	0.0315	0.691	0	0.2728	0.037	0.9761	0.0135	0.1918	0.0267	0.0042	0.0752	0.2165	0.0453	0.3351	0	0.8471	0	0.8296	0.0575	0.0549	0.0566	0.0048	0.0068	0.1482	0.0212	0.3537	0.0372	0.0048	0.0134	0.7481	0.0131	0.0224	0	0.3656	0.01	0.0378	0	3.1996	0	0.5664	0.0025	0.6288	0	0.3232
79188	TMEM43	transmembrane protein 43	3.7855	0.5615	7.5336	1.3082	4.516	1.0417	18.5884	2.7267	3.8504	3.0845	14.9216	1.747	0.4138	1.1971	4.112	3.0584	1.6949	0.4589	1.6887	0.3144	3.0181	1.5322	0.9684	1.3347	2.6003	0.6035	1.2473	0.7876	1.0303	1.9888	1.9186	1.1896	0.9162	1.7073	1.7052	1.0575	1.4519	1.7969	2.4697	1.0869	7.1356	1.1801	8.5133	0.7276	3.6811	1.9553	1.3764
3709	ITPR2	inositol 1,4,5-trisphosphate receptor, type 2	0.0352	0.0714	0.1768	0.1346	0.1414	0.1917	1.6474	0.9069	0.4704	0.338	0.1477	0.258	0.0018	0.2557	0.0743	0.1377	0.0421	0.0332	0.0228	0.0137	0.6631	0.2754	0.0042	0.083	0.5409	0.0588	0.0319	0.0738	0.0168	0.4832	0.0188	0.355	0.0187	0.1377	0.1183	0.6437	0.0568	0.4628	0.2349	0.4759	0.031	0.0879	0.1715	0.0612	0.068	0.6669	0.0167
553115	PEF1	penta-EF-hand domain containing 1	0.9054	0.7833	1.5613	1.1875	2.2007	1.1335	1.5205	1.2705	0.7279	1.4664	1.1972	0.8891	0.2095	0.7429	0.411	0.7664	0.4694	0.4299	1.1525	0.3847	1.5076	4.0603	0.4358	0.7538	1.8347	0.9749	1.5071	0.7225	0.9104	1.2191	2.3925	0.3084	0.8835	2.2986	1.6286	1.0353	2.0763	2.6119	2.7671	1.3591	0.5865	0.2955	1.5671	0.5818	1.8993	2.395	0.9671
5511	PPP1R8	protein phosphatase 1, regulatory subunit 8	0.0865	0.0781	0.0514	0.9055	0.4568	0.0405	0.184	0.1467	14.5101	0.154	0	1.0025	0.0407	0.1034	0.3114	4.7597	20.118	5.6751	0.0383	0	0.0497	0.1924	0.0499	0	0.0515	0.0385	0.2577	0.0924	0.1606	0.0625	0.2239	0.2277	0.0862	0.2483	0.5854	0.4573	0.5175	0.2199	0.3699	0.2217	0.4261	0	0.3692	0.0707	0	2.6493	0.0503
8879	SGPL1	sphingosine-1-phosphate lyase 1	0.9657	0.1352	1.976	0.6012	0.2801	0.0178	1.5098	0.1161	0.5868	1.5784	0.2222	0.116	0.1722	0.6696	0.5104	0.0769	0.2103	0.056	1.6807	0.045	1.0408	0.1978	0.3303	0.1072	0.0489	0.0567	0.1168	0.1651	0.1581	0.5484	0.0707	0.0827	0.2016	0.1659	0.1979	0.1248	0.281	0.2861	0.1578	0.2365	0.1088	0	0.0844	0.109	1.4927	0.171	0.3443
1967	EIF2B1	eukaryotic translation initiation factor 2B, subunit 1 alpha, 26kDa	4.19	0.4518	0.5378	0.4891	1.3423	0.9791	1.5848	0.5986	1.6142	0.8159	0.2911	0.6269	0.155	1.2514	0.9715	0.1591	4.2964	0.084	0.3165	0.761	0.8683	1.0763	0.2472	0.7816	0.3226	0.4599	1.2483	0.35	0.7839	0.2281	0.7882	0.5551	0.5386	1.271	1.8979	1.0403	1.1595	1.5975	1.7747	0.6962	0.7365	0.3149	1.176	0.5074	0.5186	0.4764	0.3718
1374	CPT1A	carnitine palmitoyltransferase 1A (liver)	1.3002	1.3196	1.0098	1.9369	3.7382	1.8604	0.633	2.3886	1.7975	2.6653	1.3381	2.5746	0.0837	1.6254	0.482	2.2911	0.7984	1.3832	0.3278	1.1118	0.9004	1.9867	0.3086	4.3693	0.523	2.2252	0.1172	1.9311	0.1909	2.1431	0.148	2.4349	0.21	2.6416	1.3789	2.6974	0.068	2.5107	0.3754	1.3814	2.1652	2.5807	1.2333	2.0847	1.7803	3.6428	0.3358
1147	CHUK	conserved helix-loop-helix ubiquitous kinase	0.0216	0.0271	0.0115	0.0213	0.0663	0.0794	0.0117	0.0137	0.0122	0.1218	0.0804	0.1475	0	0.0764	0	0.0228	0	0.0048	0.0032	0.0061	0.0184	0.0735	0	0.1555	0	0.0583	0.0072	0.0114	0.0021	0.0384	0.0352	0.0141	0.0062	0.0383	0.0621	0.0276	0.0122	0.0256	0.0168	0.0192	0.0046	0.072	0.0043	0.0273	0.0714	0.0152	0.0075
51719	CAB39	calcium binding protein 39	0.4958	1.2358	0.8422	2.3615	3.0186	2.5397	1.9271	1.7001	1.8398	1.8947	2.1693	1.5109	0.0988	2.0436	1.3637	1.085	0.4525	0.547	0.1504	0.3742	1.3932	5.8043	0.2886	4.3562	1.0827	1.3412	0.4471	3.1147	0.687	1.3569	1.081	3.3477	0.7018	3.5719	0.9047	2.2064	1.0277	2.3534	1.0655	0.7706	1.1312	1.5123	1.5015	0.7175	1.2443	1.2894	0.6774
1785	DNM2	dynamin 2	9.5801	1.7404	4.2489	2.0588	8.667	3.673	2.4511	2.2765	9.0412	3.5512	2.4008	2.3165	0.647	3.2462	1.9404	6.6116	1.9965	1.2949	2.3847	0.9805	2.3392	3.1063	0.6771	6.8044	2.1919	2.1582	2.442	1.9824	2.6133	2.863	1.9406	1.991	2.0961	3.3082	3.5832	1.8387	1.3895	2.6308	2.9151	1.7604	2.9252	1.1193	3.1296	2.1959	3.0181	2.5303	1.3723
4090	SMAD5	SMAD family member 5	0.2066	0.0226	0.0443	0.0312	0.0465	0.0208	0.0764	0.1345	0.0479	0.073	0.0406	0.0247	0.0013	0.0496	0.0124	0.0098	0	0.0138	0.1009	0.0127	0.0716	0.1022	0.0054	0.0115	0.0322	0.0375	0.0053	0.0081	0.0227	0	0.0135	0	0.0055	0.1729	0.0191	0	0.0218	0.0407	0.0247	0.0117	0.0623	0.0496	0.0322	0	0.004	0.0179	0.0205
23395	LARS2	leucyl-tRNA synthetase 2, mitochondrial	0.004	0.7014	0.0123	0.6195	0.2137	0.8242	0.028	0.3169	0.0966	0.8507	0.0475	0.7051	0	0.458	0.043	0.8708	0.0208	0.1736	0	0.0651	0.0044	1.2084	0.0244	0.8123	0.0011	0.7684	0	0.6958	0	1.9373	0.0981	0.7619	0	0.8586	0.0622	0.7741	0.0041	1.4558	0.0321	0.353	0.2516	0.2893	0.0051	0.4817	0	0.7645	0
307	ANXA4	annexin A4	1362.36	26.0783	971.062	29.5835	770.25	22.2904	769.74	26.6487	1466.37	93.9198	1596.56	22.6893	158.2	24.8528	320.348	20.5995	378.741	3.4503	406.022	4.4479	701.202	58.3068	253.916	60.7041	394.941	24.8414	422.298	34.051	504.198	52.2104	510.102	38.6443	243.048	44.9679	277.664	28.6164	372.422	40.4432	917.101	60.2057	907.938	13.8474	745.274	26.3307	311.775	23.8032	146.826
23141	ANKLE2	ankyrin repeat and LEM domain containing 2	0.0082	0	0.0262	0	0.0949	0.0075	0.0456	0	1.1957	0	0.0054	0	0.0032	0.0207	0	0	0	0	0	0	0	0	0	0	0	0	0	0	0	0	0	0	0.0043	0	0.029	0.0179	0.0097	0.0181	0.0071	0.0171	0.0036	0	0.0128	0	0	0.0021	0
79661	NEIL1	nei endonuclease VIII-like 1 (E. coli)	0.0616	0	0	0	0	0	0	0	0	0	0	0	0	0	0	0	0	0	0	0	0	0	0	0	0	0	0	0	0	0	0	0	0	0	0	0	0	0	0	0	0	0	0	0	0	0	0
9149	DYRK1B	dual-specificity tyrosine-(Y)-phosphorylation regulated kinase 1B	0.0283	0.05	0	0	0	0	0.025	0	0	0	0.0091	0.0353	0	0	0.0098	0.0182	0	0	0	0	0	0	0	0	0	0	0	0	0	0	0	0.0108	0	0.0137	0.0616	0	0	0	0	0.0066	0	0.0129	0.0142	0.052	0.0142	0.0177	0
57644	MYH7B	myosin, heavy chain 7B, cardiac muscle, beta	0.028	0	0.0024	0.0015	0.0047	0.0011	0.0014	0.0022	0	0	0	0.0006	0	0.0046	0.0005	0	0	0.0008	0.0017	0	0.003	0.0033	0	0.0037	0	0.0027	0.0015	0.0026	0.0024	0.0039	0.0055	0.0028	0.0019	0.0032	0.0013	0.0017	0.0023	0.0032	0.0019	0.001	0	0.0004	0	0	0.0005	0.0006	0.0003
79666	PLEKHF2	pleckstrin homology domain containing, family F (with FYVE domain) member 2	0.2951	0.0261	0.0998	0.4009	0.2933	0.1427	0.1849	0	0.0664	0.2146	1.4985	0.4432	0.0039	0.1258	0.6351	0.305	0.1341	0.0609	0.1309	0.0048	0.1419	0.4276	0.0098	0.5203	0.3522	0.1838	0.0099	0.0225	0	0.0501	0	0.0186	0.0161	0	0.0914	0.0711	0.054	0	0.0259	0.012	0.2331	0.1205	0.3051	0.2281	0.3304	0.0748	0.0121
7260	TSSC1	tumor suppressing subtransferable candidate 1	1.5688	0.5615	0.6221	0.4894	1.1014	0.688	0.9918	0.7849	0.5525	0.729	1.8634	1.5718	0.0088	0.2904	1.4055	1.4705	1.0832	0.3133	1.4253	0.3818	0.4209	10.7014	0.4388	1.0623	0.3749	0.6524	0.6952	0.2186	1.0756	0.6321	1.6433	0.9086	0.424	0.2368	0.5771	0.7741	0.2697	1.5027	0.4918	0.927	0.7061	0.8192	0.8719	0.7299	0	0.6006	0.2961
494115	RBMXL1	RNA binding motif protein, X-linked-like 1	3.4351	0.5259	3.1443	0.8216	3.922	1.7018	1.0664	1.2731	1.277	1.0916	0.2044	1.0091	0.1129	0.9208	1.2688	1.8192	1.0835	0.7494	1.1807	0.4197	1.6234	1.0422	0.4636	1.363	2.7977	0.777	2.5822	0.7765	0.7792	2.142	1.564	0.6906	2.7221	4.1275	1.4363	1.1178	1.4428	1.9066	3.0355	2.1196	1.8168	0.324	3.1663	1.0107	1.0324	3.6018	0.7845
6655	SOS2	son of sevenless homolog 2 (Drosophila)	0.0105	0	0	0	0.014	0.008	0.0034	0	0	0	0	0	0	0.0027	0.0512	0	0.0567	0	0.0029	0	0	0.0098	0	0	0	0	0	0.008	0.0084	0.013	0.0214	0.0158	0	0	0.0064	0.0048	0.008	0.015	0.0091	0.0016	0.0057	0.0059	0	0	0	0	0
7320	UBE2B	ubiquitin-conjugating enzyme E2B	0.7931	0	2.9167	0.132	1.1552	0	0.1396	1.4376	0.951	0.2786	0.3316	1.2546	0	0.9483	0	1.4984	0.2562	0.5905	0	0	0	0	0	1.7964	1.3052	0.0571	0.2796	0	0.1156	0.2524	0.2574	0.3143	0.1094	0.3254	0	0.3279	0.2911	0	0.2414	0.1654	0	0	0.9216	1.2054	0.1011	1.959	1.3727
6132	RPL8	ribosomal protein L8	0.1521	0.3416	1.0164	0.9397	1.4256	0.6968	1.4752	0.2265	2.0176	1.6451	2.0433	0.7496	0.2203	0.8075	1.9478	0.3434	0.6994	0.2411	0.9247	0.2792	2.4029	0.4864	0.8855	1.2854	1.0618	0.9351	0.7076	0.3055	0.7889	0.7437	1.1384	0.3857	0.5266	2.0284	1.3776	0.6405	0.8672	0.3881	2.1392	0.5923	0.5232	0.4922	0.3909	0.2086	1.136	0.4566	1.1775
643677	CCDC168	coiled-coil domain containing 168	0.0451	0	0	0	0	0.0031	0	0	0	0	0	0.0092	0	0.0088	0	0.0196	0	0	0	0	0	0	0.0006	0	0	0	0	0	0	0	0	0	0	0	0	0.005	0	0	0.0031	0.001	0	0	0	0	0.0198	0	0.0024
55347	ABHD10	abhydrolase domain containing 10	3.4454	36.6349	1.3651	28.3538	15.4563	26.5546	6.4578	28.2441	24.1495	28.587	11.2854	27.5082	0.4467	38.6996	2.2665	41.5986	3.8798	8.0834	1.7255	2.2201	2.789	42.942	0.9656	47.4429	1.8458	27.5319	2.7405	42.6168	6.1187	77.6456	3.9236	23.2803	3.0174	35.2234	4.9837	32.148	3.2094	40.6353	3.9184	16.6449	18.8744	6.1328	18.8102	31.9298	0.9774	33.6573	1.7837
11309	SLCO2B1	solute carrier organic anion transporter family, member 2B1	0.0249	0	0	0	0	0	0.0444	0	0.0239	0.0089	0.1526	0	0	0	0	0.0173	0	0	0	0	0	0	0	0	0	0	0	0	0	0	0.1737	0	0	0	0	0	0	0	0	0	0	0	0	0	0	0	0
841	CASP8	caspase 8, apoptosis-related cysteine peptidase	0.9484	0.0025	0.7709	0.1878	0.9833	0.105	1.78	0.324	0.6094	0.434	1.2823	0.046	0.0867	0.0555	0.092	0.0413	0.3011	0.0083	0.2041	0.102	0.1297	0.0663	0	0.0281	0.1139	0.1207	0.3406	0.0961	0.265	0.1914	0.1748	0.0685	0.1273	0.101	0.3902	0.06	0.2222	0.4683	0.2999	0.0784	2.5658	0	2.5429	0.6772	0.6503	0	0.1453
160428	ALDH1L2	aldehyde dehydrogenase 1 family, member L2	1.8528	1.759	0.0183	4.3627	0.0215	4.0011	0.3866	1.1006	0.0359	1.7753	0.1004	2.4646	0.0171	3.9881	0.257	1.0724	0.3147	0.0547	0.4769	0.1577	2.7841	4.231	0.3782	2.9656	1.8841	2.6378	0.1181	1.5858	0.0485	4.0499	0.488	1.6488	0.0307	0.6297	0.0784	3.1499	0.2474	0.6456	0.2181	0.3717	3.955	0.4452	0.4374	2.2498	0.0179	0.4844	0.0503
6578	SLCO2A1	solute carrier organic anion transporter family, member 2A1	0.0425	0.1648	0.0825	0.0429	0	2.3095	0.0157	0.0106	0	1.8394	0	0	0.1806	5.0039	0.3842	0.7378	0.0523	0	0.826	0	1.8575	0.0396	0.6666	0.0341	0.7739	1.4454	0.2576	0.1739	0.9699	1.7269	0.4456	1.3827	0.8314	0.0346	2.2126	0.018	0.0151	2.9211	1.7203	0.0176	0.0066	0.0235	0	2.1568	0.0125	0	0.0728
51109	RDH11	retinol dehydrogenase 11 (all-trans/9-cis/11-cis)	0.2922	0.4648	0.4109	1.8091	0.1003	0.9916	0.3723	0.9515	0.313	0.5958	0.0587	0.7866	0.1827	0.9191	0.4118	0.9306	0.2079	0.3518	0.3686	0.1558	0.6859	0.9215	0.1306	1.4788	0.4776	0.565	0.017	0.4127	0.2797	0.966	0.2867	0.7098	0.109	0.721	0.5356	0.5763	0.2977	0.9919	0.3785	0.512	0.0474	0.8545	0.2538	0.5351	0.3196	0.4301	0.2576
196374	KRT78	keratin 78	0.0815	0.011	1.4149	0.3392	0.3085	0.1031	0.6098	0.3008	0.5139	0.3391	0.4723	0.0944	0.2132	0.1345	0.1487	0.167	0.3995	0.0741	0	0.0102	0.7789	0.6171	0.5931	0.6239	1.1543	0.2401	0.0332	0.5302	0.388	0.4737	0.0403	0.1837	0.4767	0.5344	0.3026	0.125	0.7238	0.1784	0.0369	0.0251	0.7707	0.0362	0.3225	0.1089	0.379	0.2105	0.5919
79877	DCAKD	dephospho-CoA kinase domain containing	0.2272	0.1072	0.2699	0.627	0.3111	0.6661	0.1052	0.2723	0.1635	0.3443	0	0.4966	0.0434	0.1976	0.1155	0.3415	0.09	0.0878	0.1761	0.1637	0.2114	0.5609	0.0892	0.3387	0.1652	0.1741	0.2958	0.9336	0.3025	1.135	0.4281	0.8065	0.1682	0.2892	0.3834	0.3202	0.1955	1.6392	0.2567	0.4874	0.3001	0.3114	0.0334	0.2687	0.2665	0.4559	0.0661
10907	TXNL4A	thioredoxin-like 4A	0.8189	0.7944	2.6411	0.8291	0.764	0.7453	6.8296	0.6299	9.286	0.3382	4.9565	2.3301	0.2276	1.6202	1.1165	1.2368	0.7029	0.1807	0.8126	0.2001	0.9581	1.0539	0.1482	0.527	0.6635	0.0209	0.7746	0.7258	0.9926	0.8735	0.6817	0.5538	0.5696	0.9395	0.714	1.173	0.5875	0.6134	0.9493	0.7369	1.4829	0.5861	3.7018	1.078	0.1802	0.4323	0.2995
6192	RPS4Y1	ribosomal protein S4, Y-linked 1	0.3455	0.1412	0.1145	0.2832	0.0408	0.2339	0.1058	0.0363	0.1019	0.1682	0.2455	0.1777	0.1964	0.1429	0.0191	0.0336	0.1012	0.0563	0.2372	0.1725	0.3013	0.1235	0.143	0.2659	0.1404	0.2806	0.1483	1.3119	0.1973	1.6143	0.1626	1.4335	0.0726	0.0941	0.1396	0.1045	0.0296	0.0263	0.1968	0.1194	0.3592	0.0969	0.1206	0.0823	0	0.3738	0.0125
8803	SUCLA2	succinate-CoA ligase, ADP-forming, beta subunit	0.8148	9.6463	1.426	16.6037	6.4166	22.5718	2.6505	12.9487	6.8043	14.0446	4.0077	16.5883	0.1599	11.525	1.5694	8.4029	1.5561	1.38	1.8545	4.1497	2.6291	17.2414	0.7838	16.2188	2.5138	12.0111	0.9223	8.8191	1.2116	18.1891	1.6973	18.9607	0.7233	11.4829	3.6696	10.3073	0.916	13.9495	2.1251	5.9129	3.3754	5.5117	4.9947	14.386	5.5345	14.5781	1.1701
8315	BRAP	BRCA1 associated protein	0	0	0.0133	0.0067	0.0723	0.016	0.0295	0.0062	0.0214	0.0264	0.0535	0.0078	0	0.0088	0.0128	0.0401	0.0554	0.0082	0.0041	0	0	0.0496	0	0.0061	0.0057	0.0035	0.0138	0.0086	0.0172	0.0143	0.0192	0	0.0099	0.0221	0.0107	0.0689	0.0201	0.0116	0.0198	0	0.0101	0.038	0.0117	0	0.0084	0	0.0078
148170	CDC42EP5	CDC42 effector protein (Rho GTPase binding) 5	0.0697	0	0	0	0	0	0	0.0153	0	0	0	0	0	0	0	0	0	0.0088	0	0	0	0	0	0	0	0	0	0	0	0	0	0	0	0	0	0	0	0	0	0	0	0	0	0	0	0.0921	0
9612	NCOR2	nuclear receptor corepressor 2	0.006	0	0.0125	0	0.0094	0	0.1272	0	0.0477	0	0.0486	0	0.0097	0	0.069	0.0039	0.1392	0.0054	0.0294	0.0008	0.0079	0.0007	0.0106	0	0.0023	0	0.1146	0	0.0212	0	0.0165	0	0.0093	0.0011	0.021	0	0.021	0	0.0161	0	0.0159	0	0.0678	0	0.0064	0	0.0061
3291	HSD11B2	hydroxysteroid (11-beta) dehydrogenase 2	0.5832	16.8644	0.4584	22.7557	0.3396	17.9578	0.2559	10.8523	0.412	25.4316	0.1968	31.1374	0.6324	21.2782	2.2693	17.2683	0.5734	4.2186	0.7381	2.1652	0.9494	20.7375	0.0984	10.3113	0.1669	21.0118	0.3134	17.3386	0.5596	20.3817	0.0891	12.932	0.2725	48.7785	0.7857	21.1776	1.3383	11.3387	0.547	9.333	0.0326	21.1135	0.1362	22.2659	0.7409	12.6876	0.7183
1075	CTSC	cathepsin C	2.991	1.9192	0.7618	3.2457	2.625	5.9671	0.5688	3.6122	2.357	3.9425	2.953	9.288	0.1646	3.0266	2.3295	5.4459	1.8088	0.8589	1.1619	0.2464	0.5663	12.3283	0.4811	7.5167	1.3502	5.6485	0.2572	2.7846	0.3383	8.6652	0.4912	4.4191	0.5119	5.7373	0.9032	7.4249	0.8415	4.485	0.7637	2.9469	0.7966	0.6467	3.737	4.967	0.1744	2.0444	0.3185
1211	CLTA	clathrin, light chain A	4.6954	0.273	12.5393	7.0361	2.4109	2.3829	1.016	1.2668	0.9103	2.3979	4.5169	4.1147	0.18	1.5293	5.9848	1.7671	8.2037	0.1925	10.3705	0.6918	5.7162	10.5432	6.6128	9.5275	5.8718	7.3181	3.0236	0.8299	2.7868	7.1127	1.4458	6.6156	1.3889	5.4106	2.4736	4.5547	1.2996	3.6029	2.9851	2.2266	6.2413	0.79	7.741	0.9424	4.384	0.8157	0.3041
79036	KXD1	KxDL motif containing 1	0.2125	0	0.0869	1.1048	0.0703	0.0588	0.0551	0.0333	0.1818	1.3355	0.3259	0.1299	0.0101	1.1384	0.1239	0.0466	0.9901	0	0	0	0.0666	0.0779	0	1.3278	0.0565	0	0	0	0.0283	0.0261	0.0407	0.1808	0.0573	0.1417	0.2751	0.0393	0.3138	0	0.1589	0.1328	0.0434	0.9649	0.0646	0.0252	0.0599	0.0324	0
5338	PLD2	phospholipase D2	0.0077	0	0.0047	0	0	0	0.0267	0.007	0.0129	0.0142	0.0072	0	0	0.0024	0	0	0	0.0017	0.0187	0	0.0038	0.0064	0	0.0023	0.0221	0	0.1066	0	0.0237	0	0.0102	0	0.0064	0.0018	0.2428	0	0.1406	0.0066	0.1738	0	0	0	0.012	0	0.0024	0.0033	0
23788	MTCH2	mitochondrial carrier 2	4.3729	7.9047	18.1153	30.157	28.9554	66.7637	2.8745	8.0116	7.2765	25.5075	16.0307	31.1277	0.1104	13.5118	3.1221	29.2003	4.0255	3.8544	0.6298	2.0257	2.663	21.8575	0.6835	35.9914	2.3648	16.6824	0.3726	16.4628	0.8069	29.1605	1.4748	27.3538	0.9826	22.0693	10.0554	22.4249	0.9166	29.9186	5.1131	16.2402	12.5593	15.255	6.83	32.7191	2.9422	11.9321	0.7015
408	ARRB1	arrestin, beta 1	1.8142	0.1342	0.3588	0.5928	0.3048	0.1491	0.2442	0.259	0.498	1.0646	0.3242	0.2315	0.0072	0.3445	0.6875	2.0879	0	0.0834	0.1119	0.1836	0.5893	0.2337	0.1494	0.8475	0.2034	0.274	0.0803	0.0827	0.0839	0.1236	0.3131	0.0941	0.046	10.4977	0.1882	0.1087	10.33	1.6129	0.1643	0.1683	0.2822	0.0621	0.5559	0.3195	0.3901	0.5655	0.4631
5595	MAPK3	mitogen-activated protein kinase 3	2.5027	0.3844	1.7205	0.6835	4.0445	0.7825	2.9998	1.7531	2.9623	1.3316	2.169	0.7533	0.0615	0.6756	1.1321	0.9399	1.1444	0.4365	0.699	0.6799	3.0364	1.6567	0.6914	1.083	2.9141	0.799	1.974	1.0732	1.4701	0.8487	2.4021	1.1461	0.6163	2.0397	3.8291	0.9668	2.5852	1.665	2.7134	0.6137	1.309	0.7827	1.7477	0.4429	2.6873	0.9778	0.8414
81693	AMN	amnion associated transmembrane protein	0.1848	3.8638	0.9808	11.3145	0.578	3.5624	3.2799	5.1525	0.1111	10.7271	0.853	8.7903	4.3412	8.4213	6.4519	7.8244	2.3695	0.064	0.5853	0	0.8044	8.8578	2.5856	5.0119	1.4266	10.6247	0.5624	4.6194	2.8227	5.9322	1.4325	6.542	4.2054	4.4016	2.6971	7.3092	4.2076	6.4534	2.0632	3.4119	3.0649	12.2742	1.6062	13.8481	0.3499	1.0234	1.5399
4048	LTA4H	leukotriene A4 hydrolase	8.6093	3.1562	3.5007	5.6836	11.2349	11.4595	12.1113	10.5307	8.2389	8.4525	9.2083	7.7731	1.2086	5.3484	8.2308	7.9147	5.608	4.2842	3.7656	1.8932	7.7523	6.6526	1.0308	5.5207	4.9963	3.4946	5.9211	11.2502	6.5646	10.9943	11.047	9.6354	3.9103	10.0454	9.6599	6.7689	7.2546	10.7762	8.9452	5.8715	4.6306	3.0101	14.0075	4.6911	9.1709	8.013	5.9172
4682	NUBP1	nucleotide binding protein 1	0.127	0.2614	0.0115	0.1208	0.3451	0.0217	0.3074	0.1569	0	0.0262	0	0.1486	0.0852	0.1783	0.249	0.1384	0.1705	0.0495	0	0	0.1823	0.2381	0.0135	0.19	0.3454	0.075	0.1014	0.09	0.1532	0.152	0.2259	0.2421	0.1075	0.2022	0.2436	0.1883	0.2168	0.5607	0.5864	0.1865	0.0731	0	0.3316	0.1151	0.4251	0.5697	0.2442
581	BAX	BCL2-associated X protein	3.8283	1.6093	4.8363	2.3947	11.4117	2.5533	8.5316	2.6992	11.3045	2.3305	7.0042	3.2333	1.1456	3.8092	2.5861	1.5757	0.5001	0.5986	2.5765	0.3803	3.2257	3.3866	0.4162	2.867	3.2018	1.4968	2.4612	3.3733	2.7533	3.3916	3.2631	2.6398	1.2657	2.9893	3.8523	1.3648	2.9982	3.1255	2.824	1.3041	4.3567	1.988	4.6911	2.2784	6.8026	0.8565	4.994
6904	TBCD	tubulin folding cofactor D	0.2516	0.1466	0.1216	0.4306	0.6641	0.8476	0.2731	0.0799	0.319	0.3667	0.3222	0.2843	0.0105	0.2971	1.0294	0.2963	0.0634	0.5614	0.0303	0.0162	0.2174	0.3795	0.0196	0.254	0.1394	0.2202	0.0682	0.3944	0.0645	0.3634	0.2377	0.3337	0.0493	0.2905	0.6967	0.2337	0.2464	0.1806	0.1244	0.1358	0.1434	0.2315	0.1246	0.2779	0.2576	1.0396	0.1276
5164	PDK2	pyruvate dehydrogenase kinase, isozyme 2	0.3755	3.6466	0.4212	3.1614	1.1493	4.3119	0.6017	2.8663	2.1848	1.9318	1.9235	4.9848	0.0771	5.7052	0.243	3.594	4.2852	0.3122	1.1904	0.741	0.549	2.2232	0.5792	4.1856	0.1899	2.7579	0.2893	2.2029	0.8807	4.9012	0.5957	2.8783	0.5325	2.909	1.5922	4.9239	0.5385	3.5332	0.6218	3.202	1.6786	2.0718	4.5584	3.1781	3.3576	0.8414	0.243
6604	SMARCD3	SWI/SNF related, matrix associated, actin dependent regulator of chromatin, subfamily d, member 3	0.0077	0	0.0086	0	0	0	0	0.0056	0	0	0.006	0	0	0.0031	0.0075	0	0.0053	0.0082	0	0	0.0294	0.0024	0	0.0047	0	0	0	0	0.0035	0	0	0	0	0	0	0	0.0177	0	0	0.0046	0.0049	0	0.0089	0	0.0227	0.0084	0
2959	GTF2B	general transcription factor IIB	0.5687	0.0337	0	0	0	0.1037	0.6346	0.0256	0.6764	0.2735	0	0.184	0.0061	0	0.0195	0.0186	0.0383	0.0394	0.0281	0.0132	0.0191	0.0076	0.1847	0.0134	0.2152	0.1687	0.0934	0.1341	0.0333	0.1329	0.0465	0.1473	0.0409	0.046	0.057	0.0431	0.0346	0.0427	0.0308	0.0098	0.0636	0	0.167	0	0	0.2089	0.0211
6683	SPAST	spastin	0.0096	0	0	0	0.0497	0	0	0	0	0.0026	0.0076	0	0	0	0	0	0	0	0	0	0	0	0	0	0.0044	0	0	0	0	0	0	0	0	0	0	0	0	0	0	0	0	0	0	0	0	0.0176	0.0083
57403	RAB22A	RAB22A, member RAS oncogene family	1.2313	0	1.0195	0.1879	1.6466	0.4077	0.562	0.181	0.8827	0.7666	1.0888	0.6578	0.031	0.4815	0.5455	2.5339	0.1651	0.2097	0.1927	0.0535	0.3702	0.4999	0.0576	1.0263	0.4609	0.0421	0.2094	0.2066	0.1433	0.4469	0.2348	0.285	0.1971	0.6613	0.6109	0.1609	0.7673	0.6727	1.0154	0.2718	0.2493	0.1294	0.7234	0.0269	0.5672	0.7808	0.4205
54758	KLHDC4	kelch domain containing 4	0.3663	0	0.1272	0	0.0272	0	0.2139	0	0	0	0.1802	0	0.0028	0	0.0245	0.0076	0.0455	0	0.0348	0	0.1391	0.0923	0.0571	0	0	0	0.0085	0	0.0242	0.0442	0.0292	0	0	0	0.0076	0	0.1775	0.2355	0.0219	0.0055	0	0	0	0	0	0	0.0142
23016	EXOSC7	exosome component 7	0.0983	0	0.1744	0.2015	0.0705	0.0902	0.6493	0.0732	0.2405	0.0472	0.2677	0.2822	0.0017	0	0.1574	0.0355	0.4166	0.1029	0.2243	0.2184	0.1481	0	0.0406	0.0753	0.0636	0.1036	0.0512	0	0.0547	0.0587	0.1238	0.0761	0.0635	0.1333	0.0484	0.029	0.1215	0.044	0.1415	0.0312	0.3301	0	0.3694	0.1546	0.2229	0.0636	0.1541
200316	APOBEC3F	apolipoprotein B mRNA editing enzyme, catalytic polypeptide-like 3F	0.2115	0	0.0409	0	0.1849	0.0062	0.2455	0	0.03	0	0.2228	0	0.0101	0	0.0193	0.036	0.0475	0	0	0	0.0063	0	0.0037	0	0.0142	0.004	0.0226	0	0.0192	0	0	0	0.164	0	0.0413	0	0.0296	0	0.0574	0	0.0325	0	0.0421	0	0.1088	0	0.0275
9946	CRYZL1	crystallin, zeta (quinone reductase)-like 1	0.1341	0.042	0.014	0.9756	0.3824	0.4521	0.4165	0.2995	0.635	0.7119	0.3518	0.5004	0	0.2678	0.1476	0.2122	0.0523	0.027	0.2	0.0532	0.4582	0.5404	0.1647	0.4433	0.2813	0.2102	0.1499	0.278	0.1555	0.6698	0.3485	0.2208	0.1629	0.2658	0.1106	0.472	0.114	0.366	0.2609	0.7906	0.4238	0	0.081	0.0857	0	0.1153	0.1994
25962	KIAA1429	KIAA1429	0.0047	0.0022	0.0101	0	0.0122	0.0273	0.0855	0.006	0.0095	0.0049	0.0082	0.0035	0.0055	0.0229	0.0094	0	0.0028	0.0272	0.0019	0	0.0036	0.0223	0.0012	0.003	0.0199	0.0014	0.0135	0.2002	0.0156	0.0079	0.0054	0.1779	0.0021	0.0079	0.0184	0.0725	0.0237	0.0139	0.0529	0.066	0.0089	0.0017	0.0538	0	0.0037	0.0097	0.0572
11080	DNAJB4	DnaJ (Hsp40) homolog, subfamily B, member 4	0.1438	0.1604	0.1704	0.1653	0.6292	0.2663	0.6484	0.274	0.1529	0.2908	0.3758	0.3439	0.0594	0.2086	3.6944	0.2418	0.2976	0.1074	0.2762	0.0472	0.8726	0.315	0.3115	0.6377	0.389	0.1107	0.7134	0.0812	0.1872	0.2716	1.0485	0.4112	0.1066	0.3028	0.6867	0.798	0.2517	0.338	0.3736	0.6373	0.3012	0.0492	0.61	0.1739	0.168	0.4018	0.1099
23564	DDAH2	dimethylarginine dimethylaminohydrolase 2	6.3083	2.092	1.1121	17.6604	10.1881	16.9622	2.027	5.7926	0.9828	25.8222	2.1892	11.9488	0.1233	2.5099	3.3715	4.8002	1.8792	1.1607	0.9696	0.795	4.5336	9.7415	1.1359	10.8101	6.9865	8.8495	2.1164	2.9641	0.7601	5.8576	2.4443	4.7396	1.8778	13.5946	5.5635	10.5342	3.8226	5.1652	5.4453	3.6629	3.1837	2.4161	6.7851	12.2884	1.6347	2.8543	0.8959
728400	USP17L28	ubiquitin specific peptidase 17-like family member 28	0.0046	0	0	0	0	0	0	0	0	0	0	0	0	0	0	0	0	0	0	0	0	0	0	0	0	0	0	0	0	0	0	0	0	0	0	0	0	0	0	0	0	0	0	0	0	0	0
3035	HARS	histidyl-tRNA synthetase	7.0875	0.7347	2.6026	1.1969	3.3092	1.7053	3.6845	1.5687	2.0417	1.5604	6.0252	1.9947	0.3963	1.2798	2.0637	4.5966	2.3909	0.383	0.7183	0.2559	2.1944	2.7724	0.2056	1.7683	1.2273	0.7796	1.7125	1.0201	1.112	1.7541	1.1595	1.4026	0.6262	1.393	1.561	1.275	1.0379	2.7359	1.4278	1.184	2.7243	0.8473	2.557	0.8735	2.5767	0.8274	1.862
4599	MX1	myxovirus (influenza virus) resistance 1, interferon-inducible protein p78 (mouse)	0.9511	0.0084	0.0243	0.011	0.7224	0.0237	1.7067	0.2328	1.7838	0.6255	0.1391	0.0561	0.1133	1.3635	0.9619	0.6782	0.0246	0.0086	0.436	0.1471	0.1678	0.0207	0.1115	0.1037	0.1312	0.0992	0.3617	0.2656	0.1229	0.0166	0.5416	0.5365	0.1241	0.1519	0.2018	0.005	0.4181	0.1158	0.1939	0.0361	0.067	0.0928	0.1252	0	0.4368	0.4052	0.2655
3676	ITGA4	integrin, alpha 4 (antigen CD49D, alpha 4 subunit of VLA-4 receptor)	0.0204	0	0.0066	0	0.0194	0	0.2959	0	0	0	0.0136	0.0945	0	0	0.004	0	0.0072	0	0	0	0.0761	0.0093	0.0048	0	0	0	0	0	0	0	0.0274	0	0	0	0.0207	0	0.0214	0	0.0028	0	0	0	0.0165	0	0.0226	0	0
54785	C17orf59	chromosome 17 open reading frame 59	0.0766	0.1659	0.1008	0.1764	0.1018	0.044	0.017	0.1413	0.1388	0.225	0.0432	0	0.0164	0.1122	0.0318	0	0	0.019	0.0448	0.0164	0.0517	0.1248	0.0215	0.0289	0.0397	0.071	0.0363	0.0963	0.0564	0.2873	0.0858	0.0084	0.0288	0.4549	0.0488	0.0245	0.063	0	0.5675	0.0921	0.0651	0	0.0649	0.1124	0.4047	0.1738	0.049
79751	SLC25A22	solute carrier family 25 (mitochondrial carrier: glutamate), member 22	0.0326	0.1399	0.2805	0.1537	0.5322	0.5849	0.2116	0.1403	0.3771	0.0997	0.5122	0.221	0.0186	0.1241	0.4411	1.1106	0.201	0.0715	0.072	0.0585	0.1924	0.3618	0.0102	0.4962	0.087	0.1318	0.0331	0.0599	0.182	0.8585	0.0886	0.5136	0.1484	0.5073	0.1339	0.3619	0.0328	0.2815	0.2053	0.1666	0.8491	0.185	0.1838	0.1128	0.3446	0.1718	0.0645
57498	KIDINS220	kinase D-interacting substrate, 220kDa	0.0846	0.0132	0.0809	0.0108	0.2647	0.17	0.0695	0.0202	0.0419	0.013	0.0478	0.0903	0.0022	0.0904	0.0146	0.0115	0.0038	0.0032	0.0603	0.0094	0.1771	0.0423	0.0349	0.0356	0.0055	0.0083	0	0.0479	0.009	0.0616	0.0037	0.0158	0.0149	0.0682	0.0252	0.0582	0.0139	0.0777	0.0316	0.0305	0.0163	0.0046	0.0738	0.048	0.0048	0.0079	0.0178
10631	POSTN	periostin, osteoblast specific factor	13.4963	1.0957	4.5773	6.743	26.7054	2.09	21.5152	0.3805	89.6637	19.4897	5.3625	1.7348	5.8169	2.3892	40.2611	3.8344	13.3138	0.0126	21.6328	0.0019	33.882	1.6652	4.8032	2.7746	74.1485	3.2835	71.0624	3.769	21.6805	2.6543	18.3759	3.8325	34.9314	8.5296	66.8938	2.3229	18.5919	2.4205	17.0211	1.9039	163.933	0.7169	21.3188	1.0206	4.8835	1.3076	5.5103
1962	EHHADH	enoyl-CoA, hydratase/3-hydroxyacyl CoA dehydrogenase	5.2019	29.7676	2.5244	57.1022	6.3864	37.9444	6.4761	18.2337	11.4895	54.8311	5.6449	56.2104	0.6458	60.3801	4.9032	39.4686	9.0477	1.6757	2.0081	0.7156	6.1769	85.5532	0.2613	46.5576	3.2979	37.5793	2.3162	19.2533	3.0379	61.9612	0.931	24.4686	1.8202	17.1997	13.1648	28.4887	2.6165	32.3415	4.2618	15.4439	27.1046	28.5624	4.7822	64.2392	2.6164	8.301	1.6368
5530	PPP3CA	protein phosphatase 3, catalytic subunit, alpha isozyme	0.7785	0.4343	0.7109	0.8537	0.3586	0.4247	0.5746	0.2216	1.8703	0.9648	0.5925	0.4808	0.1867	0.6892	0.6352	0.2562	0.3048	0.0731	0.726	0.3089	0.6958	1.2292	0.1147	0.6687	0.5185	0.1087	0.2083	0.2359	0.266	0.326	0.4077	0.221	0.1099	0.3497	0.3103	0.219	0.4238	0.2844	0.4425	0.0931	0.6101	0.1875	0.8308	0.1195	0.3561	0.7849	0.5573
161198	CLEC14A	C-type lectin domain family 14, member A	1.7755	0.01	0.1342	0.0306	0.1746	0	0.166	0.0357	0.0682	0.1982	0	0.0393	0.0831	0	0.1175	0	0	0.0282	0	0.011	0.2204	0.0126	0.1587	0	3.3999	0.0171	1.4924	0	2.0097	2.5731	0.7984	0	0.0255	0	0.1783	0.05	2.6389	0	3.1256	0.1499	0	0.0155	0.0775	0.0303	4.8453	0.073	4.3585
100505503	RPS17L	ribosomal protein S17-like	3.8914	1.1884	1.0676	1.004	2.1882	2.448	3.2954	1.3773	2.7637	1.6932	5.1954	1.8578	0.7153	3.0865	2.7546	1.0938	2.0584	0.6649	3.6853	0.7614	1.9412	1.5378	0.6604	2.3581	1.465	1.336	2.8427	3.235	0.7836	2.8564	1.6717	0.756	1.7405	2.0297	1.5512	2.0455	1.4486	1.0564	2.2543	1.8037	2.8556	0.0348	1.9251	1.5513	0.8504	2.0528	1.1052
2023	ENO1	enolase 1, (alpha)	442.882	328.871	1161.09	606.33	1276.12	749.66	2889.36	876.267	3152.53	899.244	2949.77	776.853	303.092	682.499	1576.92	743.636	1422.22	414.461	1304.06	267.817	2184.17	642.016	498.972	488.34	1851.25	357.013	1538.85	451.175	1376.53	680.376	2756.4	508.219	788.351	730.786	1640.37	455.43	2030.5	515.058	2343.59	475.429	1536.47	271.315	4493.25	443.823	1590.08	952.58	1547.6
9692	KIAA0391	KIAA0391	0.0756	0.1658	0	0.0417	0	0.1939	0	0.3112	0	0.1951	0.0128	0.0681	0	0.8458	0.0156	0.1535	0	0	0	0	0.017	0.5018	0	0.259	0	0.2181	0	0.258	0	0.2021	0.1629	0.6071	0	0.4398	0.1162	0.365	0.0156	0.3966	0	0.1733	0.0816	0.0461	0.1771	0.3389	0.0056	0	0
23186	RCOR1	REST corepressor 1	0	0	0.0245	0.0051	0.0345	0.0341	0.0516	0.018	0.0656	0.0282	0	0.0271	0	0	0.4342	0.0329	0.0418	0.015	0.0116	0	0.0074	0.0105	0.0079	0.01	0.0062	0	0.03	0.0053	0.1588	0.0213	0.181	0	0	0.1229	0.0129	0	0.0207	0.0068	0.0072	0	0.0137	0.0733	1.7991	0.2005	0.0274	0.0492	0
388	RHOB	ras homolog family member B	1.7532	0.8786	1.2873	0.8671	3.6878	5.3464	3.0053	3.6511	1.7067	2.1605	2.2205	3.1794	0.2806	2.8833	2.0175	1.523	1.8876	0.467	1.4455	0.2376	1.2327	2.0772	0.5412	1.5376	1.4571	0.9813	2.2596	2.05	1.1261	2.5669	3.4092	2.8793	1.6977	4.0276	4.142	2.7034	2.0169	6.26	2.9644	2.9442	1.2375	0.7086	2.0529	1.3749	0.6001	1.6667	1.0571
85007	PHYKPL	5-phosphohydroxy-L-lysine phospho-lyase	4.8266	0.6322	1.514	0.4425	1.5691	1.038	3.7571	0.2262	1.0508	1.6702	3.701	0.6981	0.4176	0.4404	2.6429	0.9682	1.1493	0.1487	1.2197	0	2.6273	0.9147	0.2871	0.6445	0.7623	0.3529	0.607	0.2126	1.5583	1.1626	1.3983	0.6158	1.3224	0.8225	0.6848	0.4652	2.9668	0.6295	1.482	0.3966	2.3736	0.4949	2.027	1.7548	1.0596	0.2672	0.7213
4548	MTR	5-methyltetrahydrofolate-homocysteine methyltransferase	0.8635	0.1272	0.146	0.0366	0.2492	0.2012	0.2693	0.0422	0.2617	0.3936	0.6235	0.1564	0.0208	0.1859	0.1037	0.0534	0.0738	0.0211	0.0085	0.0076	0.3398	0.397	0.0111	0.3587	0.3881	0.0656	0.0537	0.0825	0.3721	0.1648	0.1472	0.049	0.0181	0.0743	0.0661	0.0801	0.1099	0.163	0.1133	0.0178	0.0334	0.0162	0.5669	0.0837	0.0669	0.2714	0.1831
100996820	LOC100996820	POTE ankyrin domain family member I-like	119.346	1.2911	49.1766	54.1068	18.3315	9.3202	9.7093	12.0562	9.4643	9.1539	5.1799	6.9611	2.0536	11.9734	6.9256	7.6973	3.2291	1.6773	21.8232	21.8503	31.8572	24.2265	7.7933	60.6511	19.8287	10.5807	15.7462	14.0363	12.339	23.1753	15.3545	12.9577	9.8087	18.108	8.2184	11.7983	10.282	15.2132	14.2399	11.7354	10.3214	1.2966	7.611	3.6876	3.1588	7.4123	5.3743
9414	TJP2	tight junction protein 2	0.166	0.1759	0.1275	0.3423	0.3386	0.433	0.0951	0.2264	0.2434	1.0016	0.0606	2.5038	0.0321	0.4815	0.3102	0.3515	0.3686	0.1286	0.1941	0.1352	0.3111	0.4169	0.0706	0.3595	0.208	0.305	0.184	0.3312	0.09	1.1817	0.1988	1.0391	0.0621	0.4064	0.1968	0.4818	0.0719	0.2929	0.21	0.2164	0.1725	0.048	0.4068	0.1804	0.0611	0.3865	0.0246
79050	NOC4L	nucleolar complex associated 4 homolog (S. cerevisiae)	0	0	0.335	0	0.0782	0.0247	0.0487	0.1274	0.1761	0.0112	0.03	0.0095	0	0.0071	0.0172	0	0	0	0	0	0.0495	0	0.3643	0	0.0051	0	0.0606	0.0265	0.0499	0.148	0.1163	1.6548	0.0092	0.0716	0.173	0.0162	1.0548	0.046	0.0675	0.0083	0.013	0	0	0	0.1765	0.0382	0.0161
644591	PPIAL4G	peptidylprolyl isomerase A (cyclophilin A)-like 4G	0.0123	0.0153	0	0	0.279	0.0958	0.1019	0	0.2834	0.0316	0	0	0.0252	0.3559	0.0071	0.0604	0	0	0	0.2877	0.3977	0.3946	0.2342	0.3876	0.3166	0.2586	0.6293	0.5026	1.6849	0.379	1.1866	0.7028	0.4414	0.4968	1.0528	0.358	0.4832	0.3299	0.8059	0.1343	0.2603	0.0262	0	0.0368	0.0394	0.1148	0.2353
6144	RPL21	ribosomal protein L21	1.1194	0.5138	0.9008	0.3252	0.2344	1.0536	0.354	0.7915	0.903	0.9312	6.6326	0.423	0.0348	2.555	4.2074	1.7101	2.7497	0.6648	2.522	0.2655	0.835	2.0738	0.1147	0	1.1003	0.9936	0.68	1.034	0.0214	1.4298	0	0.7487	0.7405	1.7016	0.6063	0.3862	0.2034	0.5434	1.3281	0.4134	1.8618	0	0.6804	0.5291	0.0229	0.9288	1.9151
3673	ITGA2	integrin, alpha 2 (CD49B, alpha 2 subunit of VLA-2 receptor)	0.1651	1.1119	0.3245	3.2188	0.5039	0.476	3.4759	0.228	1.5046	3.0049	3.9706	3.845	0.137	0.9688	1.7306	4.4255	0.2823	0.3384	0.2669	0.6429	0.5638	3.108	0.6844	3.1823	2.2364	1.2461	0.0237	0.4298	0.3212	0.9284	0.2679	2.109	0.1102	3.6358	0.5051	2.2604	1.9799	0.3506	1.6857	1.2731	3.5389	0.0828	3.8916	2.3112	2.2684	0.4245	0.1753
29958	DMGDH	dimethylglycine dehydrogenase	2.2228	12.4578	0.8083	18.1772	6.2556	24.7516	1.7184	5.75	5.5989	9.5883	9.4662	19.17	0.2779	27.1738	2.1417	28.5097	2.1836	1.5281	0.5428	0.4988	3.8654	27.0198	0.7805	25.7162	2.6059	16.66	0.7182	11.8425	4.5854	49.5153	1.7426	30.8183	0.7762	12.5802	5.6321	18.5984	1.3207	20.0858	1.2158	5.9788	9.1031	14.8513	6.0428	25.7849	4.1094	6.0509	0.4688
3851	KRT4	keratin 4	0.1842	0	0.0068	0.066	0.0083	0.0112	4.3978	0.157	4.2572	0.0188	0.0741	0	0.001	0	0.0351	0	0.0223	1.0981	0.0204	0.9959	0.0366	0.0573	0.0036	0.3334	0.2458	0.0533	0.05	0.0121	0	0	0	0.0886	0.0248	0.0424	0	0	0.1227	0	0.0668	0.0506	0.7642	0	0	0	0	0.9276	0
7984	ARHGEF5	Rho guanine nucleotide exchange factor (GEF) 5	0.027	0.0022	0.0006	0.0007	0.0267	0.0016	0	0.002	0.0034	0.0088	0.0211	0.0019	0	0.0078	0.0012	0.0015	0.0019	0.0404	0	0.0017	0.0041	0.0022	0	0.0025	0.0076	0.0014	0	0.0019	0.0033	0.0301	0	0.0008	0.0092	0.0063	0.0009	0.0029	0	0.002	0.0036	0.0108	0.012	0.0004	0.0039	0.0006	0.2331	0.0035	0
23597	ACOT9	acyl-CoA thioesterase 9	3.9959	0.4008	0.8183	0.4567	3.3899	0.8018	0.789	0.7254	3.5142	1.416	1.2764	0.7038	0.0794	0.9492	0.5434	1.2374	1.0266	0.4452	0.3792	0.4381	1.0629	1.9435	0.7079	2.154	0.7333	1.0418	0.6163	0.7529	0.4043	0.8528	0.4159	1.4287	0.468	2.0289	1.0166	0.8147	0.432	1.4409	0.5618	0.568	1.261	0.3515	0.78	0.9157	1.2717	1.1622	0.0932
4747	NEFL	neurofilament, light polypeptide	17.4115	0.7319	22.2063	1.5305	18.4039	2.1361	31.5377	0.114	23.5975	7.2759	31.5096	2.6236	0.8212	0.558	14.0476	3.1334	12.0315	0.5247	10.2664	1.9104	20.5539	0.7126	3.1418	0.5742	7.8959	0.6833	4.638	1.6662	2.3989	0.5208	11.5921	1.1268	6.1542	2.1159	8.5952	0.81	10.25	1.1368	7.0361	0.3774	13.9927	0.5768	20.3978	0.5325	23.8674	0.349	0.1281
7332	UBE2L3	ubiquitin-conjugating enzyme E2L 3	10.2363	4.3884	4.6274	5.4723	9.6121	14.3736	13.0441	7.5901	9.0363	24.6429	24.0972	6.5875	4.0962	6.0537	2.9655	11.5867	3.2436	2.7604	3.7191	2.1004	5.4232	9.3134	3.0955	5.9823	8.7748	4.744	12.2386	10.0535	7.2288	12.9002	17.195	16.391	6.6081	17.5694	8.4156	9.3697	9.0042	9.4003	13.1646	9.6122	10.664	2.0436	8.227	4.3079	3.2988	9.4599	4.9454
7913	DEK	DEK oncogene	2.6406	0.5664	0.6975	0.3795	1.24	1.1607	0.9391	0.7013	0.9015	1.4019	0.8597	0.8996	0.1199	0.5983	0.9309	0.8795	0.5753	0.4881	0.635	0.2985	1.2782	0.8877	0.2067	0.4857	0.8699	0.2985	1.7439	1.3005	1.0969	1.8874	1.965	0.4179	0.6319	1.6037	1.9052	0.7028	1.614	0.995	1.4901	0.9894	1.2386	0.1659	1.4063	0.2867	0.8524	1.5578	0.5968
1152	CKB	creatine kinase, brain	0.3597	16.0531	0.0394	23.3427	1.6382	29.6996	0.3086	92.3742	97.1196	15.637	20.2349	52.3334	0.0051	29.4305	2.6986	71.904	0.1124	42.9944	2.733	29.1836	6.459	36.0391	2.8906	52.8388	0.8653	15.0603	0.2174	63.2952	6.8321	47.0231	78.2558	38.3025	2.5661	96.0338	0.762	19.983	0.6256	50.7164	58.3301	16.5734	2.5318	6.1968	167.19	13.0486	2.3111	126.767	0.084
55471	NDUFAF7	NADH dehydrogenase (ubiquinone) complex I, assembly factor 7	0.122	0.3738	0.0069	0.6105	1.2091	0.6678	0.1869	0.1929	1.0869	2.2384	0.4956	0.9643	0	0.9968	0.2103	1.1085	0.0072	0.1167	0	0.0808	0.4916	0.8306	0.0178	0.9821	0.2875	0.6588	0.0528	0.4765	0.0603	0.5205	0.0304	0.3443	0.3533	0.3866	0.603	0.2983	0.0422	0.5802	0.3889	0.1787	1.3341	0.7512	0.5195	0.2533	0.095	0.2722	0.0426
54812	AFTPH	aftiphilin	0.0069	0.0249	0.0231	0.0337	0.3103	0.0926	0.3686	0.2701	0.0204	0.0564	0.0069	0.1683	0.0274	0.0426	0.0265	1.8734	0.2222	0.0129	0.0211	0	0.0715	0.0713	0	0.0325	0.0215	0.0878	0.0205	0.0172	0.0161	0.4849	0.0914	0.7172	0.02	0.1747	0.0204	0.0698	0.0976	0.1357	0.0209	0.0318	0.2458	0.0432	0.2645	0.0507	0.0362	0.2346	0.1282
9801	MRPL19	mitochondrial ribosomal protein L19	2.5127	0.5106	0.2024	0.5859	0.8042	0.8341	0.3675	1.1453	0.8216	1.0865	0.5986	1.2701	0.1054	1.6462	0.2102	1.6329	0.2807	0.4632	0.1862	0.2623	0.4214	1.1765	0.0988	0.722	0.0727	0.8478	0.0712	0.5942	0.1246	1.3617	0.2495	0.5493	0.0342	1.3251	0.294	0.8639	0.1834	0.8354	0.2434	0.8776	0.6411	0.5033	0.509	0.7698	0.3418	0.9251	0.1817
8455	ATRN	attractin	0.0263	0.0871	0.0189	0	0.1078	0.0311	0.0501	0.0173	0.0423	0.0515	0.0307	0.0556	0.0087	0.0098	0.0479	0.0489	0.3049	0.0368	0.0976	0.0103	0.1555	0.0374	0.0035	0	0.0285	0.0019	0.0535	0.0212	0.0232	0.0347	0.0028	0.4779	0	0.0294	0.1108	0.0393	0.0421	0.0877	0	0.053	0.0304	0.0368	0.0724	0.0229	0.1526	0.0041	0.0772
6868	ADAM17	ADAM metallopeptidase domain 17	0.0553	0.0593	0.1098	0	0.0499	0.0113	0.1698	0.0585	0.0512	0.1609	0.0977	0	0.0062	0.0132	0.052	0.0171	0.0134	0.0505	0.0063	0.0052	0.1224	0.0535	0.0553	0.0818	0.0901	0.009	0.0066	0	0.0253	0.0114	0.0193	0.0324	0.0251	0.0078	0.0242	0	0.0239	0.0099	0.052	0.0257	0.0559	0	0.0257	0	0.0403	0.0768	0.0495
10269	ZMPSTE24	zinc metallopeptidase STE24	0.3039	0.3793	1.7413	0.5533	0.8878	1.0607	1.8894	1.3144	1.1488	1.028	2.6312	1.0818	0.1316	0.8236	0.2568	1.4855	0.6351	0.306	0.5462	0.1317	0.6673	1.0933	0.0613	0.4379	0.4127	0.3573	0.3413	0.8809	0.5205	1.1658	0.4455	0.9641	0.3635	0.8252	0.6827	0.6341	0.3766	1.0149	0.6258	0.4912	0.5108	0.5768	0.7735	0.6721	1.3433	0.6131	0.5011
514	ATP5E	ATP synthase, H+ transporting, mitochondrial F1 complex, epsilon subunit	1.9512	0	0	0	0	0	0	0	0	0	0.1881	0	0	0.104	0	0.3398	0.1556	0.3097	0	0.7069	0	3.3509	0	0	0.2191	3.192	0	0	0	0	0	0	0	0	0	0	0	0	0	0	0	0	0	0.2427	0	0	0.0644
5213	PFKM	phosphofructokinase, muscle	4.3795	7.6282	4.6298	9.453	7.8774	9.7591	12.6648	11.7427	7.7407	10.9236	13.1499	12.3412	2.2745	12.7438	11.1797	11.9503	9.1302	4.6761	7.7717	4.0093	4.6968	13.0914	3.4561	8.5245	5.0735	5.0567	13.117	7.9117	8.8219	16.5314	14.8165	10.039	4.0971	7.967	12.9164	7.8305	10.9274	7.0024	9.2915	5.0228	5.5468	7.169	5.842	9.0494	13.4959	7.5785	7.6616
57703	CWC22	CWC22 spliceosome-associated protein homolog (S. cerevisiae)	0	0.0149	0	0.005	0.0245	0.0094	0.0302	0	0	0	0.0065	0.0079	0	0	0	0.0051	0	0	0	0	0.0206	0.0102	0	0.0218	0.0155	0.0099	0.0045	0.0084	0.0026	0	0.0072	0.0088	0.006	0	0.0206	0	0.0155	0.0092	0.0119	0.0069	0.0116	0	0.0264	0	0.0036	0	0
421	ARVCF	armadillo repeat gene deleted in velocardiofacial syndrome	0	0.0748	0.0217	0.1689	0.0914	0.3048	0.1533	0.2268	0.0226	0.6682	0	0.0631	0.0224	0.3115	0.1516	0.2678	0.1056	0.1131	0.0356	0.0238	0.1694	0.2381	0.033	0.644	0.1275	0.9557	0.0194	0.0767	0.0433	0.1222	0.002	0.0489	0.0432	0.4291	0.073	0.1687	0.1897	0.486	0.159	0.2095	0.0074	0.0059	0.0223	0.1091	0.0034	0.2817	0.0447
5723	PSPH	phosphoserine phosphatase	0.0701	1.4706	0.1799	2.3019	1.4626	1.6814	0.4219	0.5123	2.1043	4.5986	1.7141	3.7224	0.1066	3.8714	0.3893	2.26	0.4748	0.1962	0.3707	0.067	0.6171	3.3256	0.2328	1.7014	1.0349	2.0074	0.3958	2.6811	1.8719	6.0284	1.3487	2.8626	0.7073	1.3012	4.5566	1.7286	0.4394	1.9637	1.0165	0.6903	3.5428	1.775	0.8197	2.1334	3.1583	0.4554	1.4747
8666	EIF3G	eukaryotic translation initiation factor 3, subunit G	1.812	0.2574	0.1766	0.3564	0.5037	0.5279	0.7117	0.4049	0.4327	0.5267	0.1411	0.3334	0.0283	0.5219	0.4834	0.4689	0.4896	0.0975	0.4952	0.0353	0.8292	0.1844	0.0571	0.137	0.2039	0.0808	0.3576	0.3468	0.3922	0.8724	0.4938	0.3292	0.2646	0.5612	0.719	0.3128	0.3748	0.6775	0.4414	0.3337	0.5089	0.0381	0.2601	0.3898	0.7044	0.4712	0.0806
9044	BTAF1	BTAF1 RNA polymerase II, B-TFIID transcription factor-associated, 170kDa	0.0173	0	0.0177	0.0118	0.0191	0.0499	0.0765	0.0816	0.014	0.0045	0.0173	0.002	0	0	0	0.248	0.0166	0.0015	0.0105	0	0.0108	0.0461	0	0	0	0	0.0049	0	0.0167	0.0109	0.0504	0.003	0.0112	0.0233	0.0564	0.0046	0.0096	0.0034	0.0277	0.0427	0.0023	0.02	0	0	0.0092	0.01	0.0198
23344	ESYT1	extended synaptotagmin-like protein 1	1.9264	0.7573	3.0031	0.9185	4.4258	1.4985	2.648	1.3341	2.6341	2.8124	1.8567	0.9899	0.301	1.1414	1.5592	0.8462	0.8958	0.5894	1.4867	0.3648	2.2388	2.2278	0.6892	0.9181	1.3425	0.9495	1.3525	1.29	1.6087	1.1353	2.466	0.8712	1.3428	1.8792	3.9353	1.2411	1.3395	1.3752	1.8463	1.7654	2.6305	0.5979	1.9229	0.8791	2.514	1.7175	1.3046
199953	TMEM201	transmembrane protein 201	0.6463	0.0389	0.081	0	0.1855	0.0467	0.6004	0.1071	0.1144	0.2127	0.1111	0.0322	0.0586	0.0412	0.1778	0	0.1357	0.0035	0.2357	0	0.1538	0.0737	0.1522	0.1614	0.2488	0.0252	0.2634	0.0426	0.2131	0.0351	0.1945	0.0354	0.1537	0.0695	0.5444	0.0336	0.194	0.0654	0.3351	0.0687	0.0184	0	0.1119	0.008	0.0319	0.1081	0.0666
139818	DOCK11	dedicator of cytokinesis 11	0	0	0	0	0.1638	0	0.1544	0.0146	0.016	0.0147	0.1348	0.0058	0	0	0.0167	0.1377	0.0025	0.0039	0	0	0.0018	0.006	0	0	0	0	0.0087	0.0101	0	0	0.021	0	0	0.0053	0.0208	0	0.0185	0.0085	0.0113	0.0007	0	0.0007	0.0094	0	0.0155	0.0189	0.0006
6836	SURF4	surfeit 4	3.0727	2.0942	10.2855	3.9605	8.3279	6.4484	4.8569	2.1647	5.9821	7.1331	5.323	4.0193	1.2139	4.2244	3.0565	4.2599	4.4817	1.1157	5.3909	1.1041	6.0034	7.9778	1.3465	3.5417	4.2136	2.2547	2.4384	3.0409	2.1555	4.8172	4.1028	5.4	2.4776	6.6178	5.7903	4.5917	5.1674	7.3711	6.9521	3.344	4.5714	3.7811	1.4776	3.4	8.9676	2.2291	2.0554
25890	ABI3BP	ABI family, member 3 (NESH) binding protein	1.387	0	0.0091	0.0251	0.9239	0	0.5379	0.0355	0.0575	0.0197	0.2173	0.0125	0	0	0.0522	0.2761	0.0307	2.1429	0.0253	0.0082	0.0063	0.0073	0.0704	0.0047	0.0235	0	0.0444	0.0091	0.1398	0	0.1657	0.0061	0.0166	0.1483	0.0458	0.0902	0.0636	0.2325	0.1342	0.0681	1.7003	0	0.4529	0.006	0	0.008	0.0084
60491	NIF3L1	NIF3 NGG1 interacting factor 3-like 1 (S. cerevisiae)	1.7972	1.2329	0.8411	0.9177	1.135	1.5431	0.9284	1.3401	2.3208	1.5848	1.612	1.2614	0.4425	1.86	0.5239	1.1615	0.4518	0.9479	0.6086	0.6539	1.2782	1.2926	0.3789	1.6393	1.385	0.5253	0.6518	0.5697	0.7091	2.9734	1.0764	0.6631	0.6103	1.8967	1.0072	1.7892	0.9717	0.7789	0.5944	0.5992	0.5854	0.2572	1.2987	0.8152	0.8701	1.8349	1.8767
6182	MRPL12	mitochondrial ribosomal protein L12	2.7095	1.6382	0.9119	3.969	2.0131	4.6136	1.0502	2.6312	2.4017	2.4553	1.5112	3.7691	0.1119	4.5737	1.3759	6.0487	1.4913	1.9271	0.8054	2.9008	3.4916	4.1427	0.2195	2.4699	0.5049	1.9435	0.449	2.5029	0.8528	3.6864	0.6325	2.1648	0.3777	2.7386	0.9518	3.3947	0.9623	3.3768	1.5037	1.9267	4.1343	0.0424	1.9023	2.4277	0	4.8426	0.1296
1031	CDKN2C	cyclin-dependent kinase inhibitor 2C (p18, inhibits CDK4)	0	0	0.0242	0	0	0	0	0	0.1506	0.1376	0.0991	0.032	0	0.3208	0.2409	0.1803	0	0.0838	0	0.0137	0.3272	0.0445	0.0342	0.0738	0.253	0.025	0	0	0.1472	0	0.0483	0	0	0.0801	0	0.0919	0.0545	0	0.078	0.0619	0	0	0.1835	0	0	0	0.0462
115817	DHRS1	dehydrogenase/reductase (SDR family) member 1	0.179	0.6612	1.0429	0.461	1.0267	4.029	1.8506	0.4306	0.6752	1.1964	0.9807	1.3302	0.1251	0.7988	0.5783	2.2336	0.4349	0.0731	0.4354	0.0149	1.3759	1.46	0.4277	0.9678	0.1653	0.418	0.2443	0.3923	0.3996	2.8055	0.4038	0.7908	0.1959	0.728	0	0	0.1964	0.57	0.0625	0.2501	1.5107	1.0651	1.2664	1.943	0.3683	0.221	0.0498
4522	MTHFD1	methylenetetrahydrofolate dehydrogenase (NADP+ dependent) 1, methenyltetrahydrofolate cyclohydrolase, formyltetrahydrofolate synthetase	5.5226	4.0045	2.2782	9.0979	2.1284	11.4856	5.0731	3.499	3.9818	7.7948	2.3841	7.5442	0.812	8.1849	4.3399	11.2093	4.3422	1.108	4.0792	1.7294	7.6904	10.69	0.9938	10.964	4.7418	6.005	3.3188	8.687	5.3715	10.9317	6.5767	11.6711	1.3157	8.9247	6.5278	5.7985	2.9462	9.0607	5.3408	4.1124	9.4694	2.2868	7.9056	8.604	1.3985	4.5105	1.2331
54600	UGT1A9	UDP glucuronosyltransferase 1 family, polypeptide A9	0.1337	28.3358	1.3723	26.7177	3.7269	36.4071	9.5497	5.6067	2.3694	46.3971	7.2992	21.9848	2.0097	41.9892	3.5308	33.4807	2.6734	0.1593	2.9751	0.0072	4.6354	40.9522	1.0998	22.4597	3.2163	27.5495	1.1218	15.5616	7.4461	29.2533	7.8816	37.0292	2.2379	12.7927	10.5001	27.2053	3.2503	33.2689	1.7444	20.9858	8.2082	38.3109	8.9899	42.1749	0.7768	1.4876	0.1546
64976	MRPL40	mitochondrial ribosomal protein L40	0.1621	0.1929	0.0226	0.1613	0.2979	0.0649	0.0542	0.579	0.167	0.2166	2.1629	0.2963	0.0219	0.937	0.0708	1.0612	0.0698	0.3616	0	0.1061	0.1089	0.4201	0.0229	0.2266	0.0238	0.0734	0.0679	0.1809	0.163	0.3878	0.2789	0.2917	0.0819	0.7241	0.0362	0.0311	0	0.5568	0.246	0.4657	0.3986	0	0.4047	0.1759	0.0835	0.4417	0.0312
10318	TNIP1	TNFAIP3 interacting protein 1	0.0152	0.0081	0.0454	0	0.0631	0	0.1609	0.0215	0	0	0	0	0.0251	0	0.121	0	0	0.0326	0	0	0.0387	0	0.0052	1.3661	0.017	0	0	1.2631	0.0137	1.0806	0	0	0.0054	0	0	0	0.0052	1.1678	0.016	0	0.0137	0	0.0238	0	0.0991	0	0.0395
1213	CLTC	clathrin, heavy chain (Hc)	36.5233	18.5253	34.2018	30.3171	42.3491	39.8374	48.3169	34.7738	35.762	57.0761	21.0349	27.9125	3.8343	38.8128	14.9248	25.21	20.2958	6.724	12.9965	4.6974	21.4166	34.6277	5.655	27.5846	15.1297	19.7115	16.6385	26.5196	15.2948	36.1425	23.0509	27.4213	14.312	31.1082	32.0154	27.0029	18.6066	38.1547	22.5505	25.6539	15.9738	16.9798	25.2948	30.2996	36.3984	29.4076	13.9944
100533181	FXYD6-FXYD2	FXYD6-FXYD2 readthrough	0.3669	1.4269	0.3642	2.1945	0.8891	3.4928	0.9995	6.7742	0.3596	2.6792	0.439	3.0014	0.1758	3.242	0.622	2.3044	0.321	2.5151	0.3638	1.5638	0.6087	2.7171	0.1009	2.8436	0.4792	1.44	0.6873	2.893	0.6047	5.6062	0.361	2.6061	0.3019	4.8976	0.5081	2.6207	1.1876	4.7731	0.679	7.4155	0.5153	2.9008	0.4137	1.9173	0.0463	12.5373	0.3633
10432	RBM14	RNA binding motif protein 14	1.2964	0.1613	1.3358	0.5417	0.43	0.2051	0.4867	0.1493	0.9055	1.4382	0.1249	0.4296	0.1113	0.4736	1.1925	3.4631	1.7033	0.2403	1.1823	0.0838	0.9424	1.8157	0.4585	0.8534	1.0852	0.8403	1.2346	1.3732	0.7978	0.2847	1.259	0.3752	0.3261	0.3351	0.3024	0.3031	0.3233	0.2627	0.3098	0.1861	4.1277	0	4.0537	0.9742	2.3455	0.1025	0.263
8890	EIF2B4	eukaryotic translation initiation factor 2B, subunit 4 delta, 67kDa	0.2527	0.1625	0.0966	0.111	0.2042	0.5897	0.8853	0.7061	0.4096	0.7769	1.8615	0.1322	0.0172	0.2145	0.6731	0.3155	0.5178	0.1567	0.1051	0.046	0.0769	0.2689	0.0209	0.0478	0.33	0.9437	0.0554	0.105	0.2186	0.666	0.1586	0.1191	0.1399	0.2346	0.1492	0.777	0.1409	0.1157	0.3451	0.0404	0.209	0.212	1.2538	0.6264	0.2647	0.4816	0.1103
54468	MIOS	missing oocyte, meiosis regulator, homolog (Drosophila)	0.008	0.0269	0.0592	0.0714	0.121	0.0499	0.36	0.0706	0.102	0.2386	0.2036	0.1033	0.0055	0.3656	0.0604	0.1127	0.13	0.1657	0.1403	0.0218	0.1005	0.0978	0.0226	0.08	0.1161	0.062	0.6392	0.2576	0.4564	0.0792	0.4853	0.0554	0.0502	0.2436	0.182	0.0561	0.1088	0.704	0.0672	0.1133	0.3775	0.0292	0.067	0.0608	0.1789	0.0891	0.0499
2784	GNB3	guanine nucleotide binding protein (G protein), beta polypeptide 3	0.1344	0.0783	0.5077	0.4701	0.4578	0.2551	0.1619	0.2837	0.129	0.1011	0.0724	0.0618	0.0272	0.1938	0.024	0.1005	0.03	0.0335	0.5458	0.8782	0.6887	0.9013	0.8272	0.6383	0.3159	0.3055	0.8358	1.2378	0.7194	0.7974	0.4785	0.62	0.4842	0.5406	0.5261	0.7047	0.4826	0.7996	0.5588	0.5785	0.0226	0.0141	0.0681	0.0478	0.0603	0.2147	0.1372
3305	HSPA1L	heat shock 70kDa protein 1-like	14.6693	9.1504	7.3586	18.2711	5.8011	10.4687	11.062	17.5875	18.1408	19.4237	16.8526	20.5704	1.7926	21.49	17.9109	26.5447	9.7365	11.4253	12.4151	7.9979	9.3878	22.9489	4.7646	14.9105	12.7698	11.5095	7.0274	11.4152	8.7268	24.3371	19.3058	8.4945	8.6376	19.1734	7.2277	14.3377	8.4163	13.4966	13.798	11.2031	9.585	2.5047	26.7864	12.7885	2.3595	24.3136	2.0348
23560	GTPBP4	GTP binding protein 4	0.3138	0.0144	0.2081	0.0541	0.3576	0	0.0826	0.0075	0.11	0.0549	0.2921	0.0682	0.2225	0.0446	0.4075	0.0382	0.0521	0.0106	0.0206	0	0.1704	0.131	0.0583	0	0.1609	0.1322	0.1277	0.0363	0.1827	1.2067	0.097	0.0064	0.1532	0.3668	0.267	0.0099	0.1268	0.0106	0.295	0.0822	0.066	0	0.0107	0	0.065	0.0398	0.0993
811	CALR	calreticulin	81.2948	12.8277	21.4791	42.6067	60.6017	30.0884	35.3434	24.9203	71.4001	44.038	48.256	32.5189	7.0629	47.305	19.9191	31.9151	15.8238	7.3288	5.9008	4.2493	16.3683	38.0385	5.2533	15.6359	11.0706	17.0705	16.4482	27.1233	8.5187	47.6713	19.6712	26.8955	8.7105	29.6838	40.2445	22.6412	12.5455	30.7582	22.366	17.1436	34.4969	13.7475	31.2612	28.1406	33.5384	41.9231	18.8841
54809	SAMD9	sterile alpha motif domain containing 9	0.0235	0	0	0.0035	0.2235	0	0.1001	0.0185	0	0	0.0784	0.0014	0	0	0.0057	0	0.0352	0	0	0.0029	0.0159	0.0008	0.0025	0	0.0024	0	0.029	0	0.0009	0	0	0	0.0062	0.0013	0	0	0.0346	0	0.0073	0	0.0351	0	0	0	0.0323	0.0693	0.067
50813	COPS7A	COP9 signalosome subunit 7A	2.1421	0.4866	0.3354	1.7174	0.6828	0.6276	0.6833	1.1751	1.7982	3.5521	0.7295	1.1543	0.3959	1.4056	0.8975	1.0104	0.3921	0.3577	0.6053	0.9082	1.6175	1.6305	0.5577	7.2683	0.5567	1.1409	0.5314	0.6407	0.6338	1.0352	0.8631	0.5866	0.3956	1.4011	0.7071	0.7968	0.7258	0.7108	0.885	0.6826	0.5988	0.3948	0.8354	0.7271	0.287	1.1273	0.4676
6856	SYPL1	synaptophysin-like 1	18.3233	7.9688	17.8045	15.9981	19.2537	18.5497	12.2523	38.8952	11.5851	43.7383	33.5694	19.3441	8.0237	30.8687	6.9578	51.873	14.7911	9.5493	7.4403	2.8906	12.9482	14.8685	3.9821	14.9813	4.895	15.0927	9.9506	16.9819	16.8062	33.5713	22.5974	19.0197	6.5798	21.3826	17.1653	17.4015	8.1168	19.6173	11.7535	11.4163	17.1218	10.0284	19.433	26.9551	65.281	23.3602	12.5923
8065	CUL5	cullin 5	1.4645	0.2941	0.2764	0.3224	1.1898	0.8908	0.2693	0.3032	0.7683	0.68	1.5819	0.3921	0.0381	0.5447	0.221	0.4944	1.458	0.0862	0.867	0.0803	0.7156	2.0046	0.1051	1.1036	0.449	1.0618	0.1945	0.2426	0.389	0.4388	0.5993	0.5283	0.3158	0.4973	0.499	0.5028	0.6056	0.7097	0.8816	0.4886	2.4342	0.4136	0.7102	0.406	0.6474	0.4088	0.3454
5685	PSMA4	proteasome (prosome, macropain) subunit, alpha type, 4	15.5702	2.7947	9.5807	7.1128	14.8095	5.8122	20.0049	3.9322	17.6824	15.889	16.6755	4.7436	0.767	5.2837	5.6741	8.774	4.4578	0.9562	1.4507	1.6372	9.0077	7.7077	0.3356	8.6232	6.901	2.0848	3.3295	7.0463	10.1392	13.9747	15.1429	9.0354	7.6713	14.2871	15.2341	11.3601	13.1476	6.6507	13.2416	8.8567	8.4047	4.9989	9.0195	3.3208	15.7024	3.18	5.2259
10142	AKAP9	A kinase (PRKA) anchor protein (yotiao) 9	0.1184	0.0258	0.0359	0.008	0.1595	0.0386	0.0455	0.2362	0.1904	0.0389	0.1726	0.3838	0.0012	0.0887	0.0158	0.1115	0.0336	0.0805	0.0314	0.0063	0.0571	0.2066	0.024	0.2544	0.02	0.0225	0.0223	0.1198	0.078	0.1165	0.1135	0.0893	0.0318	0.1439	0.045	0.0146	0.0322	0.2536	0.0181	0.1107	0.2502	0.0131	0.1233	0.2941	0.1378	0.4276	0.0172
283635	FAM177A1	family with sequence similarity 177, member A1	0.102	0.2622	0.2066	0.408	0	0	0.107	1.1203	0.4252	0.3658	0	0.2775	0.0968	0.253	0.6026	0.6014	0.6074	0.458	0.1072	0.2406	0.1185	0.1119	0.0419	0	0.7516	0.1104	0.5129	0	0.1658	0.1222	0.217	0	0	0.0983	0.1592	0	0.1381	0.1145	0.0434	0.1353	0	0.2573	0.7049	0.4143	0	1.2686	0.0501
54878	DPP8	dipeptidyl-peptidase 8	0.0156	0	0	0	0.0098	0	0.0485	0	0	0	0.1619	0	0	0	0.0349	0.1398	0.0181	0.1011	0	0	0	0	0	0	0	0	0.0881	0	0	0.0356	0.0043	0	0.0401	0	0	0	0.0043	0	0.0033	0	0	0	0	0	0.0073	0	0
140032	RPS4Y2	ribosomal protein S4, Y-linked 2	0.5037	0.095	0.033	0.1565	0.2211	0.1707	0.0366	0.0288	0.0307	0.0707	0.0752	0.0612	0.0734	0.1066	0.0029	0.0634	0.0055	0.0455	0.7564	0.1364	0.0786	0.1098	0.0417	0.2363	0.0704	0.2412	0.3049	0.0138	0.3657	0.0504	0.426	0.4204	0.1935	0.318	0.0353	0.0199	0.1288	0.012	0.3136	0.1539	0.1782	0.0831	0.0483	0.047	0	0.2274	0.0384
54464	XRN1	5'-3' exoribonuclease 1	0.0169	0.0534	0.0426	0.0074	0.0229	0.0075	0.7211	1.7342	2.0397	1.4234	1.334	0.066	0	1.7301	0.0225	0.0203	0.2268	0.0084	0.0579	0.545	0.3947	1.4192	0	0	0.3522	1.0539	0.0264	0.0084	0.022	0.0673	0.0333	0.0229	0.0129	0.0789	0.0406	0.0439	0.0224	0.0304	0.0458	0.0582	1.9334	0.0055	0.1298	1.4612	0.0191	0.0298	0.2722
8613	PPAP2B	phosphatidic acid phosphatase type 2B	0.7827	1.2674	2.1016	1.1063	0.9011	1.197	9.0183	0.8977	0.6497	1.1241	0.2911	0.6593	0.7099	0.8949	3.5396	1.0983	2.6538	0.2702	2.7108	0.0782	6.8791	1.3826	4.9102	0.7597	6.0639	0.8521	3.3172	0.8687	1.3068	0.7914	1.5692	1.5151	0.9299	0.79	4.1315	1.4152	1.7261	1.1998	1.0835	0.9353	0.6543	0.9958	0.7868	0.725	1.2076	0.5979	35.7366
1856	DVL2	dishevelled segment polarity protein 2	0.0093	0	0	0.1578	0	0	0.0848	0.1057	0.0681	0	0.0846	0.0106	0	0	0.0119	0	0.0188	0.0024	0	0.0453	0.0136	0.0067	0.121	0	0	0.0083	0	0	0.0065	0	0	0	0	0	0	0	0	0	0.0038	0	0	0	0.011	0	0	0.5603	0
121504	HIST4H4	histone cluster 4, H4	45.0841	20.3415	253.594	194.84	251.097	132.489	64.8496	45.8245	181.018	387.16	317.735	60.0252	22.2823	35.7052	349.848	167.609	257.572	117.165	142.745	80.1824	363.609	60.7999	95.7306	51.6642	205.655	70.7305	282.854	159.129	199.524	61.7923	261.708	114.649	131.833	219.54	281.903	103.493	153.259	72.4884	260.199	132.737	199.59	2.2379	92.3212	5.6023	103.173	194.476	87.5775
3077	HFE	hemochromatosis	0.1438	0	0.1401	0.0461	0.2326	0	0.1084	0	0.2	0.0564	0.5446	0	0.0276	0.0709	0	0	0	0	0.0655	0	0.1767	0.1039	0.1201	0.1033	0.1112	0.032	0	0	0	0	0	0	0	0	0.1215	0	0	0	0.0631	0	0.1788	0	0.0827	0	0.8881	0.0375	0.6203
84061	MAGT1	magnesium transporter 1	3.4943	0.05	0.5406	0.2943	0.1038	0.0524	0.4291	0.0731	0.1835	0.3768	0.7655	0.1703	0.0045	0.0283	0.0585	0.1205	0.0199	0.0428	0.0327	0.0909	0.3111	0.3274	0.0209	0.4835	0.2539	0.2211	0.0275	0.0253	0.0126	0.0262	0.106	0	0.0427	0.0442	0.0867	0.0225	0.0793	0.1191	0	0.0449	0.3297	0.135	0.5719	0.1507	0.5136	0	0.1061
10979	FERMT2	fermitin family member 2	54.6614	1.7504	1.2998	7.8158	2.0782	4.6469	1.407	5.0618	0.9613	5.2422	1.0606	5.36	0.1334	1.8053	3.7851	6.1019	1.7992	8.3109	1.464	3.4996	4.471	9.7401	0.7138	5.8434	2.6475	4.5883	1.2011	3.2505	1.0962	3.4	2.8839	4.3609	0.5408	2.7873	2.4619	3.6423	1.2976	3.2979	1.6303	1.5276	1.8501	5.6623	2.4342	3.9188	1.7858	3.1847	0.9313
10412	NSA2	NSA2 ribosome biogenesis homolog (S. cerevisiae)	0.0246	0.0148	0.0543	0	0	0	0.0491	0	0.0945	0	0.1013	0	0	0	0	0	0	0	0	0	0.0237	0	0	0	0	0	0	0	0.0641	0	0.0206	0	0	0	0	0	0	0	0.0748	0	0.0731	0	0	0	0.0589	0	0.0247
10491	CRTAP	cartilage associated protein	0.155	0	0.0662	0.0397	0.2497	0	0.0921	0.0123	0.1943	0.0112	0.6367	0.0636	0.0222	0.1162	0.0202	0.0063	0.0557	0.0024	0.0651	0.007	0.1254	0.0066	0.0389	0	0.1358	0	0.0723	0.0158	0.0964	0.0644	0.1116	0.0169	0.0222	0.0038	0.0418	0.0092	0.0967	0.1979	0.1087	0.0133	0.2612	0	0.3201	0.0297	0.055	0.1149	0.0731
51184	GPN3	GPN-loop GTPase 3	0.0338	0	0	0	0	0	0	0.0287	0	0	0	0	0	0	0	0	0.0211	0	0	0	0	0	0	0	0	0	0	0	0	0	0	0	0	0	0	0	0	0	0	0	0	0	0	0	0	0	0
382	ARF6	ADP-ribosylation factor 6	4.1431	3.2088	3.4369	13.7108	6.4027	28.577	2.7658	14.8086	3.7339	20.95	2.3251	14.8119	1.0657	16.3979	1.8747	8.8476	2.0394	1.8347	1.444	2.0175	1.6727	16.6888	0.6797	10.1131	1.5384	7.6036	3.5957	10.1114	4.1381	19.414	4.9683	11.0859	3.6677	21.7519	4.859	23.223	5.1266	16.7494	8.396	18.9829	3.7165	3.6107	5.9154	7.6952	1.6827	13.5943	1.1183
142940	TRUB1	TruB pseudouridine (psi) synthase homolog 1 (E. coli)	0.0322	0	0	0.0057	0.0249	0.1231	0.4646	0.217	0	0	0	0.0107	0	0.116	0	0.7675	0.5222	0	0.1656	0.0267	0	0.5388	0	0.0065	0	0.177	0.0108	0	0	0.1289	0	0	0.484	0	0.3507	0	0	0.9716	0.2139	0.2747	0	0.0078	0	0	0.2368	0.2254	0.0323
6612	SUMO3	small ubiquitin-like modifier 3	4.2681	0	0.3857	0.3138	0.2816	0	0	0	0	0	0	0	0	0	0	0	0	0	0.4276	0.2025	0.7291	0.82	0.1263	0.277	0.8388	0.5049	0.3252	0.1692	0	0.6821	0.445	0	0.1155	0.2028	0.1401	0.2733	0.0981	0	0.1185	0.1218	0.1667	0	0	0	0	0.1053	0
51264	MRPL27	mitochondrial ribosomal protein L27	0.1803	0	0	0.3869	0	0.1807	0	0	0.1483	0	0.1838	0.2556	0	0	0.2033	0.1194	0.2347	0.0989	0	0.0334	0.0928	0.6473	0	0.2522	0.0395	0.3956	0	0	0	0	0	0	0	0.1534	0	0	0	0.0601	0.0335	0.0248	0.1023	0	0	0	0	0	0.1006
23376	UFL1	UFM1-specific ligase 1	3.1991	0.4801	1.214	1.3334	1.9467	0.9312	0.9121	0.7126	1.1403	0.9645	0.2096	0.9137	0.237	1.3181	0.985	1.5277	1.3614	0.6883	0.3162	0.1745	1.151	1.1374	0.2452	1.2427	0.6628	0.8188	0.9647	1.0107	0.5674	1.931	1.3061	1.0571	1.2425	1.0896	1.6751	1.1397	1.4671	0.9803	0.8981	0.8896	0.7789	0.3835	0.5964	0.9302	0.7579	0.7229	0.6776
389898	UBE2NL	ubiquitin-conjugating enzyme E2N-like	10.1368	0.9594	3.2805	3.401	4.7415	1.3147	6.0815	0.3844	2.6705	2.4584	2.787	2.5667	0.0707	0.3033	2.7252	2.0469	2.1758	1.0496	5.8269	2.1898	4.4375	3.8834	1.2612	3.1927	5.2999	3.0327	0.6574	0.9473	0.6096	0.6842	1.4181	1.0275	0.3473	1.0016	2.0168	1.2087	0.4658	0.7363	0.9073	0.6846	2.6618	0.722	9.1972	1.785	2.5422	0.9808	0.106
730262	PPIAL4E	peptidylprolyl isomerase A (cyclophilin A)-like 4E	15.2803	11.3715	22.1393	18.526	22.0357	11.5794	27.5505	27.4947	35.106	35.9562	27.7639	4.8443	1.3576	30.3053	24.7345	39.7226	22.3541	12.3237	13.6214	1.4017	23.6697	12.5209	6.3805	13.5474	23.6136	3.0289	15.6814	12.2472	16.974	18.5403	23.2067	15.8095	7.4847	17.2604	25.6256	14.9211	19.2175	15.5173	20.9173	11.9913	47.2382	27.0321	39.5885	22.6817	91.2488	36.0747	23.8771
1340	COX6B1	cytochrome c oxidase subunit VIb polypeptide 1 (ubiquitous)	8.8256	102.362	8.9748	200.888	28.685	155.96	17.8646	340.419	20.9295	113.974	17.2827	179.012	2.2745	282.59	12.0859	330.506	6.4682	145.308	5.5109	51.5113	8.0604	58.0934	4.9306	134.492	8.0081	103.869	9.9511	152.975	8.3112	307.858	7.484	186.309	4.5925	155.989	23.8517	139.128	10.0611	195.73	16.2685	89.6778	24.3578	195.962	7.4405	208.244	10.8806	248.574	8.211
197259	MLKL	mixed lineage kinase domain-like	0.2385	0	0	0.0098	1.6739	0	0	0	0.0774	0	0.0919	0	0	0	0.0108	0	0	0	0.047	0	0.079	0.0271	0.0318	0	0	0.0318	0	0	0.0206	0	0.0272	0	0.0073	0	0.0187	0	0.1048	0	0.0878	0	0	0	0.0535	0	0.0431	0	0.0172
23780	APOL2	apolipoprotein L, 2	4.1052	0	0.3924	0.0147	0.9556	0	0.0939	0	0.0678	0.17	0	0	0.0131	0	0	0	0	0	1.3458	1.5307	1.9314	0.3494	1.0121	0.6557	1.1553	0.0777	0.5803	0.1287	0.196	0.3295	0.1148	0.1944	0.245	0.0281	0.3538	0	0.0792	0.1094	0.3336	0.0148	0	0.002	0.0367	0	0.3985	0.017	0.2919
79171	RBM42	RNA binding motif protein 42	0.0578	0.0212	0.0505	0.0682	0.0966	0.1578	0.2359	0.0722	0.0918	0.0945	0.034	0.0329	0.0144	0.1006	0	0.053	0	0	0.0357	0	0.0862	0.0425	0.0607	0.0269	0.0833	0	0.065	0.0516	0.0484	0.0406	0.0785	0.0431	0.0339	0.1607	0.1384	0.0408	0.0786	0.0761	0.0993	0.0388	0.0804	0.0451	0.1811	0.0458	0.146	0.1611	0.0756
10788	IQGAP2	IQ motif containing GTPase activating protein 2	5.3822	2.5021	0.4911	3.6106	1.0036	3.568	0.559	2.5266	0.7969	4.4878	0.6658	4.1929	0.2122	4.1673	0.8762	4.0073	0.5177	0.5825	0.2834	0.2086	2.234	4.9877	0.1682	3.9644	2.0231	4.156	0.3757	3.6458	0.8305	5.9584	0.5751	3.3348	0.4423	3.0989	0.7265	4.8431	0.3757	5.0832	0.6368	3.7908	0.6186	2.4701	0.6806	3.4376	0.3417	0.8911	0.3925
29888	STRN4	striatin, calmodulin binding protein 4	0.0157	0.072	0.186	0	0.0374	0.0501	0.1102	0.1009	0.1881	0.1228	0	0.0556	0.0046	0.1369	0.1781	0.1773	0.0273	0.0923	0.0569	0.0161	0.1632	0.2007	0.0251	0.0849	0.2486	0.0329	0.1238	0.0538	0.1092	0.0327	0.1141	0.0607	0.0606	0.1243	0.1414	0.0443	0.0874	0.0315	0.1532	0.1059	0.0338	0	0.1364	0.0053	0.1236	0.1386	0.0971
5002	SLC22A18	solute carrier family 22, member 18	0.9118	0.4196	1.1161	0.9892	1.2017	0.5915	2.998	0.0946	0.9999	0.5761	0.1918	0.2134	0.3007	0.912	0.2854	1.8592	0.4281	0.0515	1.2961	0.0206	0.3422	0.8098	0.0935	1.0322	0.1693	0.4431	0.4932	0.625	0.1533	0.6559	0.1796	0.2404	0.3453	0.0616	0.4666	0.1055	0.3085	0.2501	0.393	0.3119	0.9948	0.6138	0.3514	1.1921	0.5979	0.1742	0.2638
83692	CD99L2	CD99 molecule-like 2	0.3271	0.1887	0.0776	1.5234	0.1103	0.2006	0.0808	0.1425	0.1367	1.0162	0	0.1438	0.3403	0.8267	0.1738	0.033	0	0.0202	0.1065	0.069	0.0449	0.0349	0.0503	0.2127	0.064	0.6985	0.1814	0.1223	0.0532	0.2322	0.187	0.3595	0.0297	0.1795	0.0899	0.4777	0.0635	1.246	0.1471	0.2992	0.3243	0.1625	0.0239	0.105	0	0.3211	0.1922
197258	FUK	fucokinase	0.4011	0.2288	0.1413	0.2662	0.8045	1.3214	0.2905	0.2259	0.3881	0.5764	0.4442	0.2423	0.0259	0.2283	0.2478	0.396	0.2565	0.0248	0.0497	0.0154	0.3406	0.3691	0.0388	0.2633	0.6155	0.1187	0.2195	0.4272	0.5086	0.7404	0.4926	0.406	0.2297	0.3562	0.642	0.5061	0.4195	0.4139	0.774	0.4293	0.2426	0.3801	0.4901	0.2074	0.6682	0.2791	0.2241
1186	CLCN7	chloride channel, voltage-sensitive 7	0	0.0099	0.0193	0.0308	0.102	0	0.0134	0.1175	0.4527	0.216	0.0117	0.284	0.0066	0.0316	0.019	0.0583	0.042	0	0.0771	0.0737	0	0.1054	0.0185	0.0096	0.0094	0.0153	0.028	0	0	0.8245	0.0151	0.0242	0.0275	0	0.0615	0.0375	0	0.101	0.041	0.0367	0	0.0022	0	0.0198	0	0.0582	0
642636	RAD21L1	RAD21-like 1 (S. pombe)	0.0099	0.01	0.0137	0	0.0318	0	0.0356	0.0261	0.0279	0.0271	0.0244	0.0672	0.0034	0.022	0	0	0	0	0	0	0.0231	0.0204	0.0043	0	0	0.0082	0	0.0197	0.0162	0.0249	0.0262	0.0111	0	0.0185	0.0265	0.0118	0.012	0.0149	0.0114	0.0124	0.0177	0	0.0368	0.0113	0.0133	0.044	0.0171
54475	NLE1	notchless homolog 1 (Drosophila)	0	0	0.0937	0.0222	0.7062	0	0.1481	0.0833	0.0626	0	0.0292	0	0.0083	0	0	0.113	0.0599	0	0	0	0	0	0.0804	0	0.0135	0	0.0395	0	0.0445	0	0.0217	0	0.24	0	0.13	0	0.0482	0	0	0	0	0	0.4316	0.0602	0.7841	0	0
51667	NUB1	negative regulator of ubiquitin-like proteins 1	0.1246	0.0523	0	0	0.2114	0	0.3061	0.0633	0.2152	0.0946	0.4415	0.0362	0	0.006	0.0692	0.1499	0.3163	0.1371	0.0272	0.0177	0.0463	0.0599	0.0067	0.0213	0.0629	0.0251	0.0211	0.009	0.027	0.1532	0.0178	0	0.0216	0	0.0475	0.0118	0.0416	0.0245	0.0579	0.0222	0.2224	0	0.0512	0.0079	0.3414	0.0667	0.0509
4216	MAP3K4	mitogen-activated protein kinase kinase kinase 4	0.5596	0.0008	0	0	0.005	0.0012	0.0028	0	0	0.0109	0	0.002	0	0	0.0351	0	0	0	0	0	0.0143	0	0.0004	0.0059	0.0012	0	0	0	0	0	0.0029	0	0	0	0.0015	0	0	0	0	0	0.002	0	0	0	0	0	0.0009
5425	POLD2	polymerase (DNA directed), delta 2, accessory subunit	0.0304	0	0.0079	0	0.0225	0	0.0257	0.0165	0.0153	0	0.0334	0	0	0	0.0428	0	0.0665	0	0.0022	0	0.0069	0.0122	0	0	0.0198	0	0	0	0	0.0131	0.0243	0	0.0034	0	0.0312	0	0.0045	0	0.0335	0	0.0098	0	0.0226	0	0.031	0	0.0299
85395	FAM207A	family with sequence similarity 207, member A	0.0186	0	0	0	0	0	0.2194	0	0	0	0	0	0	0	0	0	0	0	0	0	0	0	0	0	0	0	0	0	0.0199	0	0	0	0.0096	0	0	0	0	0	1.0144	0	0	0	0	0	0	0	0
10973	ASCC3	activating signal cointegrator 1 complex subunit 3	0.1438	0	0.1951	0	0.4017	0.0167	0.1049	0.0433	0.0463	0.0781	0.3469	0.0556	0.0061	0.0518	0.0246	0.0031	0.0357	0.0106	0.0157	0.0019	0.1904	0.0236	0.1311	0.0082	0.2504	0.0017	0.0686	0.0299	0.0382	0.0119	0.0427	0.0024	0.0552	0.0343	0.8196	0.031	0.0959	0.7998	0.093	0.0214	0.0229	0.0009	0.0287	0.0029	0.0507	0.0279	0.0277
6400	SEL1L	sel-1 suppressor of lin-12-like (C. elegans)	0.1336	0.0968	0.3431	0.0666	0.2851	0.1024	0.3967	0.1047	0.6034	0.1331	0.2912	0.0716	0.0385	0.0676	0.1565	0.3126	0.2177	0.0313	0.0485	0.0054	0.1143	0.0352	0.013	0.0194	0.0098	0.0825	0.1549	0.0911	0.2093	0.1577	0.2138	0.104	0.0828	0.1296	0.1232	0.0753	0.1055	0.1211	0.1286	0.1002	0	0.0929	0.2111	0.054	0.6256	0.0799	0.0464
10087	COL4A3BP	collagen, type IV, alpha 3 (Goodpasture antigen) binding protein	0.1333	0.6586	0.0346	0.2955	1.4949	0.8677	0.698	0.7816	0.2848	0.319	0.6035	1.3408	0.0387	0.6022	0.1689	0.5062	1.6577	0.0393	0.0165	0.0107	0.3391	0.18	0	0.5461	0.087	0.1007	0.5241	0.1419	0.3891	0.5496	0.2705	0.0672	0.3315	0.6839	0.8324	0.3792	0.4336	0.6158	0.5297	0.4253	1.6161	0.6412	0.4219	0.0231	2.1622	0.0958	0.0392
123169	LEO1	Leo1, Paf1/RNA polymerase II complex component, homolog (S. cerevisiae)	0.4021	0.0074	0.0215	0.0762	0	0	0	0.0577	0.0185	0.0197	0.0285	0.0211	0	0.0235	0.02	0.0331	0.0269	0	0.0148	0.0098	0	0.0197	0.0236	0.081	0.0086	0.0337	0.0065	0	0	0	0.1435	0	0.0601	0.0073	0.0131	0.0059	0.0051	0.0031	0.0087	0	0.0109	0	0.0332	0	0	0.204	0
3054	HCFC1	host cell factor C1 (VP16-accessory protein)	0.4925	0.3695	0.3657	0.0635	0.3144	0.1771	0.7205	0.3017	1.7034	7.1042	0.9879	1.1992	0.0098	0.3137	2.1209	0.1476	0.1612	0.1951	0.2358	0.0446	0.7094	0.3886	0.1837	0.0823	0.4045	0.3023	0.1596	0.1074	0.6416	0.078	0.8663	0.1024	0.9471	0.6011	0.3078	0.3938	0.3146	0.2417	0.1962	0.1027	3.9978	0.0081	2.499	0.0791	0.1359	0.7153	0.1753
643853	TMPPE	transmembrane protein with metallophosphoesterase domain	0.0321	0.0992	0	0.2248	0.0359	0.3855	0.2103	0.4494	0	0.306	0.0509	0.2322	0	0.6177	0.0143	0.3114	0.0174	0.5168	0.0893	0.0714	0.8711	0.2015	0	0.1633	0.0763	0.5498	0.0754	0.2908	0.0278	0.2733	0.1029	0.1994	0.051	0.2569	0.0439	0.2671	0.0118	0.3388	0.1316	0.3356	0	0.0633	0.0569	0.2342	0	0.4025	0.0051
10939	AFG3L2	AFG3 ATPase family member 3-like 2 (S. cerevisiae)	0.713	2.5428	2.8647	3.0423	4.2555	6.3775	1.371	4.1929	3.3377	3.8501	1.8838	3.0497	0.1975	3.2446	0.9842	6.3267	1.3027	1.9099	1.36	2.2322	3.0587	5.2017	0.742	5.4771	2.4737	3.4981	1.2764	4.8255	1.2382	5.3819	1.656	5.4383	0.9266	4.5437	2.4532	3.8989	0.6764	4.9178	1.9576	3.4797	6.0602	1.5718	3.0609	2.6652	1.2192	4.2278	0.2542
9141	PDCD5	programmed cell death 5	13.5643	1.8498	4.325	2.8999	4.7439	2.8652	4.7486	1.5995	9.6729	3.9592	0.7936	3.4083	1.0576	3.8684	6.6692	4.6723	2.406	0.4406	4.7995	2.617	3.3089	2.1732	0.8377	2.4238	4.0742	2.3043	2.9444	3.4309	3.4583	2.3786	5.1159	1.8416	2.2933	1.8769	3.3285	1.6823	1.6899	1.3958	4.8333	1.2968	4.0011	0.9773	6.9583	2.5222	4.7703	2.2802	2.3283
10525	HYOU1	hypoxia up-regulated 1	5.2157	2.5763	3.8809	6.8162	7.5499	6.6315	5.0987	2.8021	15.3006	8.6299	16.7879	7.8147	1.3249	7.7594	1.4112	5.3151	1.6364	0.5928	2.8189	0.5589	1.4106	5.4239	0.4285	1.4926	3.7969	2.8597	2.7797	2.8817	3.2844	5.1315	4.6122	4.6461	0.607	5.598	3.0162	4.2798	1.0476	3.8248	4.6271	3.584	9.8219	0.6102	5.9306	2.9736	1.8643	4.2729	0.9356
6136	RPL12	ribosomal protein L12	21.3254	3.6515	6.6312	10.4142	5.723	4.5687	19.5005	17.649	24.9085	6.9296	39.9213	7.5793	4.9796	8.2118	7.396	8.8267	6.9301	4.4139	7.1066	2.9805	7.6751	9.6505	2.6027	11.8347	6.7827	4.4066	7.986	2.2289	5.6214	5.2629	6.2581	1.5612	2.7529	9.1842	4.8373	5.6658	8.0056	4.4604	9.0083	5.5065	11.487	2.7535	24.9235	3.2846	3.5493	9.4843	6.0753
2615	LRRC32	leucine rich repeat containing 32	0.0082	0.0058	0.1747	0.0152	0.0955	0.0257	0.013	0.0309	0.2432	0.2385	0.0197	0.0706	0.0193	0.1338	0.4034	0.0777	0.1302	0.0114	0.0106	0.006	0.6165	0.1873	0.0803	0.0199	0.1082	0.0059	0.0529	0.0121	0.0229	0.01	0.0777	0.0189	0.0403	0.071	0.0722	0.0168	0.0741	0.0403	0.119	0.0274	0.0335	0.0075	0.022	0	0.1248	0.2367	0.1402
8853	ASAP2	ArfGAP with SH3 domain, ankyrin repeat and PH domain 2	0.0236	0.042	0.0238	0.0518	0.3103	0.2203	0.2052	0.6235	0.014	0.3287	0.5488	0.2619	0.031	0.0692	0.079	0.3782	0.0111	0.0702	0.0242	0.0625	0.3511	0.4209	0.0063	0.2881	0.2046	0.205	0.0048	0.0127	0.1393	0.5027	0.3306	0.3428	0.0741	0.3922	0.2535	0.2202	0.1053	0.0256	0.1714	0.3536	0.1592	0.0236	0.1781	0.5452	0.0623	0.3002	0.0358
59345	GNB4	guanine nucleotide binding protein (G protein), beta polypeptide 4	7.8553	2.1126	5.2938	5.0503	3.058	1.959	11.7634	9.7523	7.322	5.5237	6.118	4.1631	0.8104	6.125	8.4107	12.075	6.1853	5.0715	3.0871	3.7727	4.926	5.167	2.9126	6.4664	3.3384	4.8569	2.3763	2.8373	3.8341	4.0711	1.8259	2.1054	1.5286	3.0312	2.6579	3.7539	2.2609	2.8948	2.3805	2.1197	3.0267	1.196	8.2904	4.1788	1.2976	12.2416	2.3057
7001	PRDX2	peroxiredoxin 2	59.083	188.674	231.364	200.092	229.632	222.913	196.286	119.812	56.4158	173.549	166.28	118.987	104.801	193.511	166.842	183.085	152.59	103.846	121.809	84.962	136.699	153.18	145.76	208.165	133.144	195.115	236.023	204.103	217.188	261.03	226.762	194.621	260.442	189.08	201.677	191.631	180.104	190.785	226.698	155.188	129.265	98.6441	306.842	162.493	267.779	215.01	185.382
345778	MTX3	metaxin 3	0.3214	0.0751	0.1456	0.4739	0.3522	0.2872	0.2341	0.1858	0.3946	0.1583	0.5905	0.1772	0	0.289	0	0.0703	0.036	0.0369	0	0.286	0.1224	0.6281	0.0337	0.3716	0.2195	0.172	0.0091	0.0236	0.0397	0.2908	0.012	0.025	0.0275	0.2441	0.2074	0.1694	0.0061	0.2292	0.0924	0.201	0.0603	0.0224	0.0521	0.1301	0.1169	0.1429	0
445	ASS1	argininosuccinate synthase 1	1.9234	190.071	1.1456	386.275	2.8829	347.287	1.9615	55.6383	2.1067	263.865	1.3487	138.368	0.2742	192.932	3.2698	207.959	0.4776	1.5843	0.8709	0.8362	2.2844	204.632	0.8603	303.58	2.9521	288.464	1.2964	77.1528	2.0035	404.583	5.7956	211.265	0.4545	144.799	4.162	314.491	0.7958	239.316	6.1277	143.898	0.4877	180.28	1.1321	187.067	0.503	71.5181	0.3563
27286	SRPX2	sushi-repeat containing protein, X-linked 2	0.5743	0.0302	0.0414	0.0308	0.22	0	0.0218	0.0418	0.6827	0.2548	0.956	0.025	0	0	0	0	0.3642	0.0123	0.0101	0.0395	0.0346	0	0	0	0.192	0	0.0518	0	0	0	0.1358	0	0.0417	0.0365	0	0	0.0547	0	0.0107	0.0991	1.3176	0	0.0606	0	0.0159	0.0691	0
10791	VAMP5	vesicle-associated membrane protein 5	10.8572	0.2569	3.4703	0.115	1.514	0.6976	0	0.4206	0.09	0	0.2873	0	0.766	2.3324	4.7468	0	0	0	2.6411	0.886	4.8999	0.4787	0.7894	0	0	0	0.3466	0	0.5199	0.107	0	0.626	0.0911	0.0955	0.4642	0.0839	0.4355	0	0.5347	0.3103	5.2175	0	0	0	1.8103	3.7092	0
80173	IFT74	intraflagellar transport 74 homolog (Chlamydomonas)	13.7207	0	6.7103	0.0121	0.3973	0	0.0051	1.727	0.007	0.0059	0.0234	17.1847	0	1.4835	0.0057	3.6393	0.0111	0	0	2.887	0	12.9946	0	29.5465	0	12.3496	0	0.0058	0.3905	0.0098	0.0355	0	0	0.2166	0.051	0	0.4904	0.0038	0.0329	0.0054	13.5991	0	4.556	0.005	4.1617	0.1069	0.0045
131034	CPNE4	copine IV	0.0796	0.0441	0.071	0.049	0.1381	0.1051	0.2686	0.0433	0.3091	0.2641	0.3261	0.0979	0.0086	0.0675	0.0804	0.1528	0.026	0.0207	0.0258	0.0072	0.0986	0.1024	0.0243	0.2048	0.1454	0.0511	0.0517	0.0547	0.0397	0.2497	0.0531	0.0648	0.0368	0.0702	0.0665	0.0726	0.0762	0.0885	0.0851	0.0579	0.0652	0.0482	0.1661	0.2362	0.0223	0.0605	0.0144
30849	PIK3R4	phosphoinositide-3-kinase, regulatory subunit 4	0.0497	0.019	0.0624	0.7249	0.148	0.3803	0.1052	0.0099	0.1636	0.2619	0.0679	0.7899	0.004	0.0612	0.0427	1.4723	0.0111	0.0051	0.0053	0.0012	0.2927	0.022	0.0067	0.5672	0.0618	0.0163	0.0267	0.035	0.0507	0.0868	0.1711	0.0753	0.0368	0.0686	0.1131	0.0851	0.0731	0.0508	0.114	0.0403	0.7257	0.0294	0.0261	1.0397	0.0458	0.1251	0.0386
80335	WDR82	WD repeat domain 82	1.2101	0	0.1346	0.3842	2.7979	0.0281	0.1293	0.0376	0.0746	0.1403	0.4057	0.1499	0	0.1123	0.2449	0	0.1986	0.0083	0.2076	0.119	0.4054	0.418	0.0458	0.8704	3.356	5.9944	0.0898	0.1669	0.2265	0.2267	0.1977	0.0419	0.1235	0.21	2.9653	0.1577	1.0488	0.1835	0.2175	0.1597	0.0443	0	0.2958	0.0447	0.0527	0.1669	7.7215
23107	MRPS27	mitochondrial ribosomal protein S27	0.3537	0.5226	0.1317	0.7212	0.5753	1.2959	0.2468	0.9129	0.6739	1.2342	1.0817	1.1524	0.016	0.5665	0.1065	0.4083	0.4591	0.1608	0	0	0.169	1.2938	0.0343	0.7875	0.1179	0.8834	0.0604	0.8391	0.1184	2.4404	0.161	0.8294	0.0355	0.5335	0.2879	0.9589	0.0615	1.2085	0.2488	0.7072	0.3166	0.5549	0.5034	0.7904	0.3767	0.685	0.1096
83475	DOHH	deoxyhypusine hydroxylase/monooxygenase	0.0397	0.0581	0.0105	0.0282	0.2708	0.1103	0	0.0299	0.2781	0.1742	0.0807	0.0558	0.0176	0.0553	0.0152	0.0799	0.0329	0.0172	0.1041	0.0181	0.0861	0.2295	0.0112	0.0396	0.0476	0.0802	0.0184	0.107	0.0435	0.1468	0.0182	0.0955	0.1451	0.1813	0.06	0.1065	0.0354	0.2549	0.2421	0.1537	0.06	0	0.0506	0.0808	0.0709	0.0698	0.0784
5291	PIK3CB	phosphatidylinositol-4,5-bisphosphate 3-kinase, catalytic subunit beta	0.0648	0.0671	0.0764	0	0.097	0.1573	0.235	0.0057	0.1453	0.0331	0.094	0.1053	0	0.0457	0.1086	0.0617	0.0059	0.0388	0.0154	0	0.0366	0.1182	0	0.0617	0.0259	0.0133	0.0075	0.0332	0.0137	0.021	0.0923	0.0128	0.0305	0.1168	0.126	0.0068	0.0183	0.0116	0.1364	0.0065	0.032	0.1143	0.0132	0.002	0.1222	0.0257	0.0636
55243	KIRREL	kin of IRRE like (Drosophila)	0.027	1.6092	0.0335	0.9502	0.0106	0.1075	0.0577	0.0052	0	0.1745	0.1871	0.2623	0	0.2363	0.0167	0.0124	0	0.016	0.0128	0	0	0.6065	0.01	0.944	1.642	0.5584	0.0059	0.0266	0	0.0026	0	0	0	0.037	0.0084	0.0598	0.0063	0.1005	0.0189	0.0295	0	0.0353	0.0288	0.9238	0	0.0164	0
10999	SLC27A4	solute carrier family 27 (fatty acid transporter), member 4	0	0.3697	0.2174	0.1987	0.3557	0.7866	0.0285	0.1633	0.5855	0.6246	0.4472	0.1597	0	0.215	0.1799	0.128	0.2317	0.2953	0.1923	0.0581	0.2213	0.5376	0.0041	0.4706	0.0272	0.1981	0.2886	0.2918	0.4315	0.7553	0.0919	0.9753	0.0037	0.6762	1.9486	0.4341	0.2404	0.3465	0.4505	0.5044	0.082	0.7342	0.0718	0.1364	0.0101	0.5141	0.0382
65266	WNK4	WNK lysine deficient protein kinase 4	0.0143	0.0041	0.047	0.0222	0.1595	0.008	0.0345	0.0119	0.0405	0.0537	0.031	0.0228	0	0.0098	0.0192	0.0151	0.0093	0.0203	0	0.0095	0.0527	0.0055	0.0174	0.0084	0.0182	0.018	0.0043	0.0087	0.0073	0.0113	0.0138	0.0086	0.0041	0.0087	0.0238	0.0064	0.0051	0.0052	0.0125	0.0049	0.0934	0.0041	0.0153	0.007	0.0239	0.0617	0.0052
55871	CBWD1	COBW domain containing 1	0.0027	0.0118	0.9393	0.9402	0.0025	0.0393	0.0152	0.0031	1.9266	2.227	1.9008	1.2876	0	0.4372	0.0043	1.247	0.0015	0	0	0	0.4765	0.0247	0.3059	1.0989	1.1395	0.6927	0.0042	0.989	0.5836	1.3096	1.0074	0.9815	0.0035	0.0054	0.0027	0.0025	0.0018	0.002	0.0207	0.6877	1.0825	0	0.9179	0.0121	0	0	0.5314
3890	KRT84	keratin 84	0.1518	0.0087	1.9172	0.4714	2.8598	0.2609	1.2646	0.5396	1.0887	0.2452	1.1358	0.1772	0.5688	0.223	0.0355	0.1115	0.1535	0.042	0.4336	0.0238	2.3011	0.4915	1.0562	0.434	1.3612	0.1909	0.7315	0.9344	0.6638	0.9452	2.3413	0.3603	0.8358	1.3386	1.3392	0.5273	0.6824	0.4684	0.2005	0.0733	0.7107	0.0394	0.5093	0.0833	0.5358	0.2504	0.7946
56243	KIAA1217	KIAA1217	0.2945	0.48	0.1815	0.6522	0.1316	0.4353	0.1545	0.7208	0.1442	1.0577	0.9731	0.395	0.0168	0.2205	0.9773	0.3362	0.0548	0.3012	0.366	0.3268	0.5057	0.3205	0.2606	0.2989	0.1876	0.3402	0.0403	0.3104	0.1637	0.1955	0.1907	0.2203	0.0486	1.6765	0.2078	0.2446	0.1242	0.3157	0.1703	1.166	0.2008	0.2891	0.4553	0.5555	0.3497	0.7371	0.0704
9043	SPAG9	sperm associated antigen 9	0.7531	0.1793	0.1961	0.3413	0.6487	0.4727	0.2517	0.3733	0.7561	0.4136	0.3719	0.4992	0.0373	0.6305	0.2141	0.342	0.192	0.0528	0.2991	0.0799	0.6681	0.6576	0.1622	0.2711	0.4609	0.4058	0.3302	0.234	0.5582	0.3693	0.6436	0.6596	0.3471	0.5659	0.7072	0.2911	0.4934	0.6715	0.7044	0.3887	0.5822	0.193	0.6815	0.3531	0.4955	0.2004	0.1931
445329	SULT1A4	sulfotransferase family, cytosolic, 1A, phenol-preferring, member 4	0.6806	1.2664	0.8471	1.0905	1.0217	0.2869	0.421	1.3427	2.8101	2.6174	0.9699	1.1188	0.1297	1.3516	0.7257	0.6066	0.9399	1.0135	0.4856	0.2046	1.4292	1.0652	0.3338	2.4652	0.5251	0.7739	0.204	1.5374	0.1286	0.96	0.116	0.3149	0.1313	2.1323	0.1715	0.3509	0.2341	0.4072	0.2816	0.5942	3.1975	2.3422	0.8604	1.1946	0.353	2.8583	1.075
6595	SMARCA2	SWI/SNF related, matrix associated, actin dependent regulator of chromatin, subfamily a, member 2	0.0911	0.0631	0.121	0.7049	0.0682	0.0522	0.0624	0.1881	0.0395	0.1857	0.1138	0.063	0.0032	0.0351	0.1301	0.138	0.0912	0.0665	0.0407	0.3901	0.1111	0.3188	0.0569	0.9027	0.3224	0.0107	0.1287	0.088	0.0653	0.0909	0.0842	0.1236	0.048	0.1384	0.1016	0.052	0.0291	0.0916	0.0822	0.0811	0.0507	0.0153	0.2613	0.0218	0.0743	0.1274	0.0463
80179	MYO19	myosin XIX	0	0.0173	0	0.02	0.0046	0.2555	0.0174	0.0151	0.034	0.0116	0	0.0344	0	0.0461	0.0138	0.0301	0.0233	0.062	0	0.0264	0.0068	0.0598	0.0062	0.0476	0.0127	0.046	0	0.3194	0	0.0645	0.0911	0	0.0668	0.5439	0.0041	0	0.1202	0.0101	0.0027	0.3295	0.1058	0.0327	0.264	0.0358	0.1274	0.0857	0
27332	ZNF638	zinc finger protein 638	0.1219	0	0.6436	0.0506	0.0348	0.01	0.1046	0.1344	0.0573	0.6331	0	0.0558	0.1286	0.0281	0.0211	0.153	0.1014	0.0715	0.0096	0.1102	0.4898	0.086	0.1064	0.0187	0.0504	0.0172	0.0223	0.0115	0.0077	0.0155	0.0381	0.0041	0.0357	0.0393	0.0424	0.0399	0.0287	0.0027	0.0489	0.0351	0.0678	0.0579	0.5969	0.0027	0.2596	0.0495	0.2526
594	BCKDHB	branched chain keto acid dehydrogenase E1, beta polypeptide	2.2617	5.9005	0.2756	5.722	4.8234	3.7944	2.0071	6.84	3.1745	6.6674	5.0882	9.0103	0	4.1769	0.3647	10.3934	2.2704	0.7767	1.6687	1.5377	2.4656	6.4951	0.8468	5.932	1.8226	4.7404	0.2903	6.0233	0.8606	8.0315	0.9918	6.3935	0.3175	6.2058	4.0487	5.1715	0.487	4.7741	2.6732	2.0969	1.5756	2.5012	1.1485	5.0632	0.8611	4.18	0.189
91373	UAP1L1	UDP-N-acteylglucosamine pyrophosphorylase 1-like 1	0.0249	0.178	0.2235	0.5215	0.3077	0.9373	0.2973	0.2567	0.2315	0.8383	0.2037	1.1035	0.0118	0.3151	0.1162	0.2692	0.3901	0.0341	2.0967	0.7933	1.0878	0.7421	0.1521	0.6069	0.2389	1.1182	0.0995	0.5426	0.2743	1.4603	0.3336	0.2192	0.2806	0.5329	0.7994	0.6662	0.1814	0.8776	0.2335	0.2284	0.2668	0.545	0.8938	0.4836	0.5394	0.2453	0.1042
4830	NME1	NME/NM23 nucleoside diphosphate kinase 1	37.9384	5.1495	10.2616	17.5708	19.9334	8.1812	25.5294	3.7191	45.3375	12.1412	81.4749	19.2258	0.49	5.0472	12.4594	23.0619	10.1831	8.3414	8.258	2.659	15.2696	17.6544	3.9102	16.2222	14.3403	4.7754	8.4276	7.9357	5.5484	11.836	18.3042	6.7208	2.1723	7.3925	15.0072	8.0183	8.1575	7.4809	14.8684	3.8568	47.6555	4.046	57.4809	14.1665	20.9912	2.8534	1.7568
637	BID	BH3 interacting domain death agonist	0.972	0.0971	0.0497	0.1115	0.3221	0.1475	0.9612	0	0.3761	0.1763	0	0	0	0	0.0402	0	0	0	0.0304	0	0.1812	0.1561	0.1103	0	0.514	0.0552	0.1872	0	0.1099	0	0.2095	0	0.1715	0.4594	0.5624	0.1153	0.6651	0	0.4276	0.1045	0.1586	0.0336	0.1091	0	0.3727	0	0.3601
191	AHCY	adenosylhomocysteinase	11.5264	3.8962	7.3151	29.1597	8.3973	25.024	4.8532	12.3096	12.2858	12.9159	11.481	23.5627	0.7088	15.1036	3.7404	22.3813	2.1764	0.934	2.2617	2.2705	5.7286	21.5779	0.9643	33.5343	10.4767	16.8848	1.6959	9.5788	3.9195	36.6773	4.2952	20.3452	1.1107	17.3657	4.1041	18.6672	2.8513	20.0065	3.5469	7.6238	16.071	5.762	11.9596	23.2481	2.3774	7.8561	2.6372
4864	NPC1	Niemann-Pick disease, type C1	0	0	0.072	0.0081	0.1544	0.0615	0.0234	0.0054	0.0807	0	0.0834	0.0251	0.0017	0	0.0735	0.0358	0.0541	0.0231	0.0313	0.0088	0.0162	0.0099	0.0097	0	0.0068	0.01	0.0061	0.0055	0.011	0.0083	0	0	0.0041	0.0403	0.0634	0.035	0.0515	0.0138	0.0205	0.0102	0.0197	0.0174	0.0392	0	0.0519	0.0068	0.0065
10951	CBX1	chromobox homolog 1	1.6166	2.7442	7.5906	2.8508	6.8485	2.2761	14.6686	11.1124	10.8926	8.6021	0.5365	9.0854	0.2911	3.9223	3.0751	4.739	5.3246	0.9618	1.3678	0.4807	4.7063	3.2033	1.0435	1.724	2.7147	1.8867	6.9664	3.5679	6.1151	4.297	9.0235	3.2551	3.3871	6.3599	10.689	3.9125	2.5654	5.8111	6.2218	4.2137	5.7342	3.0695	9.0422	3.7813	7.1279	12.948	5.6198
654483	BOLA2B	bolA homolog 2B (E. coli)	0.4783	0.1314	0.0676	0.579	0.7282	0.1387	0.1885	0.3555	0.8988	0.1109	0.0423	0.2571	0.092	0.2334	0.1767	0.1746	0	0.065	0	0.0627	0.134	0.2494	0.0338	0.1245	0.1034	0.1224	0.1276	0.259	0.257	0.2958	0.2554	0.152	0.1209	0.2444	0.1943	0.1426	0.1036	0.216	0.269	0.3263	0.4243	0.0636	0.0756	0.0861	0.0921	0.147	0.1981
10283	CWC27	CWC27 spliceosome-associated protein homolog (S. cerevisiae)	0.4603	0.019	0.1237	0.2026	0.0863	0.0989	0.1013	0.241	0.209	0.1055	0.0134	0.0399	0.0483	0.1071	0.3441	0.2072	0	0.0464	0.0257	0.0092	0	0.0288	0.0052	0.4479	0.1193	0.0193	0.0269	0.0207	0.0391	0.06	0.0673	0.027	0.0821	0.0418	0.0611	0.1169	0.0351	0.0183	0.1551	0.028	0.3018	0	0.3187	0.1521	0.4159	0.1038	0.2899
91445	RNF185	ring finger protein 185	0.1506	0	0	0	0	0	0	0	0	0	0	0	0	0	0	0	0	0	0	0	0	0	0	0	0	0	0	0	0	0	0	0	0	0	0	0	0	0	0	0	0	0	0	0	0	0	0
90102	PHLDB2	pleckstrin homology-like domain, family B, member 2	0.3643	0.1292	0.0189	0.0952	0.1934	0.1207	0.1489	0.0867	0.1329	0.1974	0.2978	0.0499	0.0218	0.109	0.0923	0.2793	0.1177	0.0966	0.047	0.0325	0.0931	0.0689	0.0467	0.0181	0.0618	0.059	0.1143	0.1244	0.095	0.187	0.0618	0.1444	0.0086	0.0709	0.0201	0.0286	0.0616	0.1174	0.0804	0.0552	0.0327	0.046	0.1963	0.0338	0.0133	0.0839	0.0783
219988	PATL1	protein associated with topoisomerase II homolog 1 (yeast)	0.0292	0	0.0076	0	0.1265	0.007	0.0097	0	0.004	0	0	0.0091	0	0	0	0	0	0	0.0218	0	0	0.0063	0	0	0	0	0	0	0.0021	0	0	0	0.0509	0	0.0086	0	0	0	0.0383	0	0.0061	0	0.0283	0	0	0	0
25813	SAMM50	sorting and assembly machinery component 50 homolog (S. cerevisiae)	2.31	5.951	3.0737	14.2903	18.1996	23.8412	6.28	9.1715	3.4824	16.4539	10.3154	8.1339	0.2778	8.4578	4.2732	11.6036	5.9273	3.6631	0.5044	1.5577	1.7718	10.4208	0.4951	4.835	2.082	5.2705	2.2554	5.1845	8.4853	16.7893	7.8195	15.6295	2.9796	10.4869	1.4496	22.0544	3.8329	14.9119	10.4893	12.3625	8.9321	5.8393	7.0368	10.1418	3.0787	5.2278	0.9668
10605	PAIP1	poly(A) binding protein interacting protein 1	2.7641	1.9482	3.7883	1.651	2.7412	2.2272	6.8134	2.0248	12.4761	4.2291	9.7434	2.5053	0.8084	3.1424	6.5243	4.5664	3.3654	1.3818	6.4153	0.156	3.2371	5.8466	0.8501	0.2381	4.4575	4.2966	0.6523	0.3077	0.9873	0.4942	0.4622	0.4899	0.0514	0.4662	1.7876	0.3354	1.7671	0.2828	0.4416	0.302	3.0424	0.0111	1.7252	0.3208	0.1423	0.2247	0.5995
90861	HN1L	hematological and neurological expressed 1-like	2.1216	0	0.1362	2.3294	2.7637	0.2514	0.9353	0.0814	1.522	0	0.1671	0	0	0.0505	0.1192	0.1389	0.6269	0.1405	0.3814	0.0077	0.0324	2.7716	0	0	0.0982	1.2179	0.2626	0.0525	0.8388	2.2317	0.6073	0.1888	0	0.0212	0.9329	0.1739	1.1539	0.1282	1.0056	0	0.633	0.7882	0.8122	0	0.5761	0.1734	0.1756
51096	UTP18	UTP18 small subunit (SSU) processome component homolog (yeast)	0.39	0.108	1.846	0	0.282	0	0.0198	0.1461	0.2952	0	0.3884	0.0084	0.0452	0	0.0083	0	0	0	2.7329	0	0.0373	0	0.0006	0	0.1206	0	0	0.0963	0.0239	0	0.425	0	0.0945	0.1566	0.721	0	0.8924	0.1134	0.1701	0	0.875	0	0	0	0	0	0
92092	ZC3HAV1L	zinc finger CCCH-type, antiviral 1-like	0.3845	0	0.2226	0	1.1366	0.0137	0.9145	0.015	1.141	0.265	0.645	0.0096	0	0	0.5101	0.2368	0.7121	0.1247	1.5437	0.0218	0.4121	0.147	0.0216	0	0.2765	0	0.1224	0	0.4352	0	0.4839	0	0.0116	0.3453	1.3288	0	0.3282	0.0891	0.5423	0	1.32	0	0.9609	0.1491	0.3523	0.1778	0.1213
4124	MAN2A1	mannosidase, alpha, class 2A, member 1	0.3766	0.2291	0.2293	0.3668	0.2282	0.3031	0.5872	0.5136	0.266	0.436	0.9678	0.2258	0.0116	0.3051	0.0848	0.6718	0.1506	0.7184	0.1162	0.0246	0.1542	0.5143	0.0553	0.3385	0.2387	0.209	0.0366	0.0478	0.0825	0.3041	0.0423	0.1293	0.0335	0.2766	0.0587	0.3121	0.0272	0.2937	0.223	0.2641	0.2019	0.1012	0.2335	0.2059	0.2863	0.2158	0.1075
5272	SERPINB9	serpin peptidase inhibitor, clade B (ovalbumin), member 9	6.2025	0.5177	4.3581	1.6656	1.612	0.8946	3.7888	0.621	2.5477	2.1643	0.0194	2.1789	0.4217	0.8351	4.1788	1.7679	2.1181	2.0135	1.1161	0.0865	4.4729	2.2528	0.4028	1.5149	3.6879	1.5694	1.5179	1.4485	0.4768	1.4532	1.9672	1.1076	0.641	1.3989	1.2579	0.5051	1.8591	1.1976	0.7813	0.6218	1.2369	1.7739	2.7381	0.6582	8.655	0.3803	3.5753
351	APP	amyloid beta (A4) precursor protein	0.2693	0.027	0.1513	0.1745	0.2637	0.3649	0.1168	0.1699	0.0519	0.2621	0.0829	0.0612	0.0447	0.0549	0.1223	0.0752	0.0625	0.1161	0.1946	0.4053	0.3254	1.7717	0.0729	0.19	0.3434	0.0957	0.4943	0.2684	0.2197	0.0469	0.4449	0.3452	0.2717	0.4954	0.0944	0.3857	0.2677	0.3815	0.333	0.7418	0.0681	0.0518	0.1103	0.0553	0.0495	0.2989	0.0166
57488	ESYT2	extended synaptotagmin-like protein 2	1.0828	0.6757	0.7499	0.3063	1.9371	0.5202	1.6038	0.7909	1.2527	0.7721	3.2845	0.3792	0.0599	0.4334	0.5156	2.2877	0.6617	0.2026	2.8467	0.3226	3.5716	0.7841	0.182	0.4658	0.2467	0.3445	0.3228	0.2798	0.3468	0.4073	0.44	0.381	0.3027	0.3752	0.8739	0.5898	0.3185	0.6537	0.4496	0.8085	8.0776	1.1138	0.4914	1.4449	1.3952	0.6186	0.3964
5796	PTPRK	protein tyrosine phosphatase, receptor type, K	0.0829	0.047	0.0236	0.0341	0.0363	0.0754	0.0228	0.032	0.0586	0.0775	0.1191	0.0496	0.0041	0.0721	0.0652	0.0668	0.0609	0.013	0.0197	0.0097	0.0671	0.073	0.0068	0.0859	0.0055	0.037	0.0829	0.0268	0.0308	0.1073	0.0402	0.0603	0.023	0.1444	0.019	0.0077	0.0578	0.0773	0.0877	0.0811	0.1065	0.017	0.0267	0.0389	0.0033	0.049	0.0768
24148	PRPF6	pre-mRNA processing factor 6	0.7407	5.7587	0.4036	3.4243	0.4762	0.204	2.8171	3.8026	0.5689	4.8	0.4593	5.0856	0.1023	10.1226	2.4418	11.3808	0.5974	1.4282	2.026	0.6664	4.6068	8.4323	1.0083	4.2603	1.5168	3.3053	1.2571	0.4253	0.0917	1.0653	2.2432	1.7464	0.4538	4.0098	2.4856	4.9297	0.3661	4.0002	2.9442	2.8898	3.4517	2.5584	1.006	3.8799	0.7648	0.3853	1.9688
84340	GFM2	G elongation factor, mitochondrial 2	0.2475	0.1797	0.0162	0.1018	0.3406	0.2212	0.0757	0.1831	0.579	0.1956	0.3132	0.2209	0	0.2795	0.0436	0.3177	0.0072	0.1237	0.0107	0.0954	0.0217	0.2448	0.0135	0.6404	0.0171	0.2418	0.0073	0.1931	0.0569	0.2394	0.0169	0.1892	0.0304	0.4284	0.1016	0.2396	0.0139	0.3068	0.1429	0.3138	0.2765	0.0471	0.1745	0.3628	0.0518	0.2885	0.0019
1535	CYBA	cytochrome b-245, alpha polypeptide	1.1634	0	0.4359	0.2507	0.0979	0.0411	0.0397	0	0.1819	0.1621	0.1236	0	0.0612	0.0261	0	0	0	0	0.6501	0.038	0.4153	0.1202	0.3644	0.1398	0.0457	0.0898	0.1502	0.0752	0.0984	0.0928	0.0603	0.1001	0.2193	0.083	0.2076	0.0391	0.0628	0.0573	0.1937	0	0	0	0	0	0.6797	0	0.1793
57128	LYRM4	LYR motif containing 4	0.3865	0.4657	0	0.838	0.4676	0	0.0284	1.7048	0.8974	0.225	0.3335	0.8906	0	3.1095	0.4437	1.2493	0	1.6172	0	0.8395	0.1398	0.2934	0	0.3988	0.1078	0.6037	0	0	0.0651	1.1433	0	0.5966	0.0764	1.017	0	0.7029	0	0.4587	0.2743	0.6228	0.4231	1.0114	0.4008	0.3037	0.206	0.9552	0.2644
28960	DCPS	decapping enzyme, scavenger	1.8118	0.2227	1.5953	2.2498	1.9822	2.4377	3.289	1.8388	5.4071	3.9129	1.8184	5.9043	0.1777	1.0714	1.3349	1.1547	0.8356	0.5842	1.876	0.3446	1.6253	0.8998	0.4835	0.924	1.5659	1.0412	0.4863	3.7822	1.595	4.0157	5.4785	4.9715	0.4978	10.6549	2.3759	1.9904	1.4772	6.8523	3.8611	0.7232	2.2936	1.018	9.8918	1.9585	2.1476	2.5431	1.0305
56949	XAB2	XPA binding protein 2	0.0112	0.0165	0.0184	0.0053	0.0406	0.0139	0.1364	0.0529	0.5971	0	0.2352	0.332	0.003	0.0239	0.3837	0.6082	0.0282	0.001	0.0463	0.0335	0.5298	0.6309	0	0	0.0467	0.1108	0.0224	0	0.0212	0.0031	0.0092	0	0.0549	0.0247	0.0535	0.0185	0.0841	0.0501	0.1291	0.0106	0	0.1311	0.4899	0.0394	0.1215	0.12	0.0614
55054	ATG16L1	autophagy related 16-like 1 (S. cerevisiae)	0.251	0.0312	0.1496	0.0203	0.1745	0.0519	0.0451	0	0.2548	0.1211	0.0897	0.1393	0.0107	0	0.1093	0.2054	0.0554	0.024	0.0353	0.004	0.106	0.0861	0.0287	0.0539	0.075	0.0534	0.0399	0.0221	0.0357	0.0064	0.0271	0.0788	0.0327	0.0619	0.2243	0.0336	0.0869	0.0749	0.0194	0.0265	0.1848	0	0.0273	0.0326	0.0279	0.021	0
9254	CACNA2D2	calcium channel, voltage-dependent, alpha 2/delta subunit 2	0.0314	0	0.011	0.0209	0.0197	0.0074	0	0	0	0.0147	0.0157	0	0	0	0.0149	0.004	0	0	0.0087	0.0076	0.0215	0.0163	0.0136	0.0108	0.0244	0.0147	0	0	0	0	0.0015	0	0.0007	0	0.0045	0	0	0	0	0	0.0501	0	0.0252	0	0	0	0
9604	RNF14	ring finger protein 14	7.4844	0.0268	0.0717	0.0365	0.3628	0.2461	1.0173	0.0286	0.0838	4.3455	0.6345	0.8449	0.1028	0.482	0	0.7598	0.1269	0	0	0.0289	0.4155	0.0442	0.0094	0.0319	0.1424	0	0.2572	0.7082	0.0724	0.2645	0.3349	0.3458	0.1067	0.1933	0.2904	0.415	0.2456	0.2024	0.2084	0	0.3895	0.349	0.0245	0.292	1.6399	1.7621	0.0469
55768	NGLY1	N-glycanase 1	0.0345	0.0592	0.086	0.0533	0.0912	0.2009	0.1408	0.1081	0.1572	0.1596	0.2291	0.1374	0.0053	0.1269	0.1545	0.1918	0.1736	0.0165	0.0226	0.0258	0.0257	0.0723	0.0472	0.1163	0.0903	0.1178	0.0865	0.0926	0.0805	0.168	0.1732	0.1518	0.0914	0.1097	0.1141	0.0838	0.0946	0.1157	0.2086	0.0486	0.1785	0.0093	0.1964	0.0165	0.102	0.1398	0.0974
56947	MFF	mitochondrial fission factor	0.2214	0.1979	0.2099	0.2167	0.9206	0.339	0.9032	0.5617	0.2812	1.1475	0	0.2569	0.01	0.035	0.0589	3.823	0.0693	0.0161	0.0413	0	0.0673	0.128	0.007	0.213	0.0262	0.3203	0.0806	0.078	0.0327	1.2084	0.0547	1.0957	0.0293	0.2181	0.0434	0.1738	0.0389	0.3123	0	0.3481	0.3518	0.0653	0.2873	0.41	0.1639	0.7539	0.0106
8570	KHSRP	KH-type splicing regulatory protein	7.7705	3.1025	5.206	3.1082	5.8615	3.1875	9.7507	4.5039	3.8401	5.152	1.2062	3.7201	0.6536	2.9407	4.8321	4.0275	5.4663	2.7983	5.1088	2.4122	7.2814	3.1897	2.49	1.6474	2.6603	2.5106	3.4518	2.6565	2.7438	3.0506	4.8526	3.6013	1.6483	2.7847	4.3069	2.4268	3.7575	2.2515	4.1691	2.1005	4.9793	1.2895	10.5465	3.8052	5.722	7.3748	3.1003
57180	ACTR3B	ARP3 actin-related protein 3 homolog B (yeast)	0.8802	0.2823	0.2733	0.5576	1.0248	0.7166	0.9455	0.2384	1.247	0.7745	1.6178	0.707	0.0296	0.7983	0.4504	0.2027	0.0615	0.0537	0.1617	0.0818	0.53	0.7665	0.1175	0.7016	0.1521	0.337	0.631	0.9063	0.7836	0.9797	1.193	1.6104	0.6137	1.201	1.3459	1.0451	0.7856	0.9535	0.4836	0.6713	0.6285	0.2078	0.5949	0.3505	0.7045	0.3124	0.4091
114770	PGLYRP2	peptidoglycan recognition protein 2	0.6538	1.0351	0.7616	0.2557	0.6623	0.8971	1.2284	0.7005	0.8366	0.1463	0.2023	0.5068	0.1882	0.6514	1.0259	0.804	1.102	0.5024	0.6026	0.3084	1.3186	1.0153	0.1948	0.7001	1.145	0.4258	1.0035	1.056	0.6013	0.3146	0.8933	1.9709	0.234	1.0242	1.0085	0.956	0.5824	1.5188	0.5283	1.5353	1.8233	1.1466	1.0738	0.7548	2.2079	0.9809	0.6223
222	ALDH3B2	aldehyde dehydrogenase 3 family, member B2	0.1925	0.1462	0.1821	1.5088	0.2117	1.2802	0.051	0.0229	0.0423	0.0835	0.1328	0.2579	0	0.0483	0.1696	0.3107	0.1863	0.0444	0.1687	0.0186	0.1763	0.4535	0.0342	0.9937	0.1613	0.3148	0.0523	0.1957	0.0252	0.1354	0.0224	0.2567	0.0285	0.2655	0.0849	0.3038	0.097	0.2494	0.0719	0.0272	0.2745	0.0457	1.566	0.9251	0.0366	0.0151	0
29780	PARVB	parvin, beta	1.8945	1.4887	2.0493	0.5642	0.7415	0.7116	0.7299	0.8123	0.5245	1.2489	0.3108	0.6755	0.0997	0.5877	0.483	0.3225	0.2257	0.2765	0.2227	0.1642	0.6464	0.7033	0.1855	0.6182	0.5851	0.4076	0.2797	0.7078	0.4129	0.4997	0.9248	1.1616	0.4558	0.6437	0.6311	0.3116	0.5969	0.5375	0.4699	0.4216	0.5715	0.4533	0.5408	0.5328	0.9842	1.3718	0.4583
90268	FAM105B	family with sequence similarity 105, member B	0.5226	0.0156	0.2084	0	0.3184	0.1358	0.1956	0	1.0137	0.1048	0	0.0427	0	0.0436	0.0939	0.026	0.0742	0.0431	0.0154	0	0.4181	0.1222	0	0.0517	0.3173	0.005	0.0455	0.0564	0.0524	0.0688	0	0.0506	0.0228	0.164	0.0877	0	0	0.118	0.0694	0.0178	1.0051	0	0	0	0.109	0.0091	0.0102
27072	VPS41	vacuolar protein sorting 41 homolog (S. cerevisiae)	0.0579	0.1251	0.0075	0.0088	0.1583	0.0798	0.0837	0.0243	0.1423	0.0589	0.1562	0.146	0.0078	0.0066	0.018	0.2094	0.0129	0.0026	0.0157	0.0063	0.0574	0.1277	0.0166	0.0677	0.0274	0.039	0.023	0.0382	0.0404	0.1	0.0651	0.023	0.0205	0.0396	0.103	0.1846	0.0798	0.1619	0.1034	0.0299	0.0445	0.0084	0.0111	0	0.0847	0.0562	0.0243
3795	KHK	ketohexokinase (fructokinase)	44.4899	41.9349	19.3403	129.08	16.4059	102.074	55.7944	20.2599	17.041	87.092	29.1868	97.6303	1.705	71.8948	10.7294	72.167	14.0504	1.2988	13.5108	0.1067	18.5754	144.968	2.2673	118.329	7.0592	68.0219	5.547	47.7114	12.1344	130.937	5.6881	69.3286	5.2469	44.9112	13.2701	90.9712	8.0849	57.131	7.7123	23.8133	42.2995	19.0094	9.1003	122.418	3.1979	17.2708	4.0966
8443	GNPAT	glyceronephosphate O-acyltransferase	0.047	0.0284	0.0062	0	0.0269	0.047	0.0777	0.0199	0.0508	0.0479	0.052	0.1013	0.0125	0.0087	0.0238	0	0.0221	0	0.0048	0.0454	0.036	1.3737	0	0	0.0172	0.0239	0	0.0112	0.0108	0	0	0.0192	0.0048	0.0341	0.0514	0.0173	0.0092	0.0447	0.0094	0.086	0.0493	0.0023	0.0189	0.0281	0.0419	0.0076	0.0263
4043	LRPAP1	low density lipoprotein receptor-related protein associated protein 1	0.7242	4.9497	0.9108	3.8735	3.0599	5.7038	1.7682	0.5647	0.7387	1.3872	0.0492	0.5168	2.119	8.1305	2.4938	6.2514	3.0248	1.156	0.7026	0.1653	3.4303	4.9963	0.4739	3.3773	1.6511	1.86	1.1185	2.3223	0.6368	2.4077	0.315	0.6845	1.3415	4.7515	1.0657	1.6876	1.7219	2.8592	0.6325	2.5167	1.1859	0.1345	0.7841	2.9829	1.8484	0.7352	8.1404
25782	RAB3GAP2	RAB3 GTPase activating protein subunit 2 (non-catalytic)	0.6558	0.0591	0.0939	0.1146	0.1596	1.7605	0.7497	0.1135	0.5525	0.0898	0.5479	0.1468	0.01	0.9708	0.3646	0.4296	0.1047	0.1773	0.4997	0.0352	0.2645	0.3138	0.5332	0.5815	0.6351	0.4679	0.9265	1.0276	0.0779	0.9935	0.1039	1.4835	0.1212	0.7793	1.1567	0.9797	0.5504	1.0491	0.5617	1.3133	1.9368	0.935	0.2076	0.1092	0.7318	0.6784	0.077
197131	UBR1	ubiquitin protein ligase E3 component n-recognin 1	0.1014	0.0202	0.0057	0.0164	0.2602	0.4518	0.0022	0.0929	0.0724	0.0806	0.0045	0.0911	0.0004	0.0574	0.0165	0.1219	0.0448	0.0072	0.0082	0.0199	0.0303	0.0372	0.0035	0.0178	0.0238	0.0075	0.028	0.0102	0.0207	0.0175	0.0567	0.0056	0.0407	0.0048	0.0718	0.0039	0.0552	0.0929	0.1008	0.0078	0.0033	0.0015	0.0352	0.0603	0.0271	0.0221	0.0395
11158	RABL2B	RAB, member of RAS oncogene family-like 2B	0.1322	0	0.134	0.5747	0	2.3852	0.0091	0.0241	0	0.0218	0.2674	0.0487	0	0	0.0778	0.0546	0	0	0.0313	0.0113	0.0336	0.0666	0	0.1536	0.0165	0.2654	0	0.1242	0.0524	0.0313	0.0814	0	0.0539	0	0.1013	0.0449	0.1694	0.0325	0.1019	0	0	0	0.0092	0	0.0198	0	0
8029	CUBN	cubilin (intrinsic factor-cobalamin receptor)	0.7047	5.2196	1.7993	14.8502	1.8284	10.4344	2.8366	2.9251	0.7992	14.1442	3.1077	12.3454	0.2392	11.7873	2.2773	11.6196	2.944	0.3241	1.0046	0.015	3.0015	11.8744	0.4424	7.6396	2.6363	6.753	0.5496	6.3301	1.5075	9.8351	1.5157	10.0401	0.6829	5.6811	3.664	11.7279	1.771	10.9432	0.8099	4.8281	4.2902	8.3151	4.4021	12.5762	4.2864	1.1614	1.2844
535	ATP6V0A1	ATPase, H+ transporting, lysosomal V0 subunit a1	1.6025	2.0126	1.4859	5.4632	9.8815	6.4327	1.3892	0.8257	0.851	6.9017	4.2646	3.2973	0.0752	4.7069	1.3611	7.8113	1.4845	0.1456	0.5985	0.0246	0.4982	5.412	0.3104	6.1689	1.1597	4.6012	0.5699	3.1401	0.4037	8.8449	0.2247	5.8767	0.3229	2.3328	0.8714	4.0357	0.5059	3.6575	0.3341	2.573	1.912	4.6343	0.49	3.8539	1.0822	0.5813	0.2526
5522	PPP2R2C	protein phosphatase 2, regulatory subunit B, gamma	0.0865	0.0088	0.0543	0	0	0	0.0382	0.003	0	0	0.3418	0.0479	0.0015	0	0.1507	0	0.0161	0	0.0235	0.0076	0.0035	0.0524	0	0.0607	0.005	0	0.0111	0.0184	0.0201	0.0225	0.0435	0.0199	0.0082	0.0145	0	0.0157	0	0.0128	0.0177	0.0085	0	0	0.2034	0.0086	0.0109	0.0037	0
4538	ND4	NADH dehydrogenase, subunit 4 (complex I)	0.0173	0.2108	0.1625	0.8842	0.4084	2.5923	0.1681	1.9554	0.2046	1.8633	0.3149	3.0332	0.0208	1.6046	0.1872	1.8709	0.1234	0.5992	0.0233	0.6119	0.4899	1.4968	0.1298	2.7538	0.1439	1.6119	0.1601	1.3486	0.0561	2.1161	0.0927	1.6666	0.1492	1.9858	0.1214	1.3092	0.2796	2.2993	0.1952	1.3614	0.5246	0.9726	0.069	1.1039	0.1692	2.4754	0.1338
128312	HIST3H2BB	histone cluster 3, H2bb	7.5614	16.57	78.0778	36.3673	54.2245	141.733	23.244	19.6384	86.6422	151.867	133.563	67.9294	4.3201	20.9299	55.7136	119.539	48.3444	37.6267	25.8272	8.5846	178.337	53.3736	69.5498	55.2069	89.5173	78.2933	109.538	62.5352	60.8411	88.6404	130.323	58.9077	40.7956	138.306	113.49	88.1998	82.5837	78.9784	136.241	71.3349	34.4086	3.0736	33.8207	47.4609	25.7924	148.173	15.0574
6678	SPARC	secreted protein, acidic, cysteine-rich (osteonectin)	5.5418	0.218	1.3736	0.1416	5.1819	3.3967	0.8263	0.0593	4.6891	3.1493	1.3238	0.3187	0.0612	0.0815	0.5624	0	0.2778	0	1.169	0	2.2828	0.2656	1.292	0.1817	2.0695	0.0072	2.3638	1.0479	1.303	2.3881	4.4771	1.9538	1.7582	1.6994	1.6616	2.5911	3.5066	2.3272	3.5846	0.508	1.934	0.0745	1.4773	0.1343	0.6632	0	0.3935
4619	MYH1	myosin, heavy chain 1, skeletal muscle, adult	0.0296	0	0.0026	0.0016	0.005	0.0011	0	0.0012	0	0	0	0.0006	0	0.0002	0.0005	0	0	0.0008	0.0018	0	0.0032	0.0035	0	0.0039	0	0.0028	0.0016	0.0027	0.0025	0.0042	0.0058	0.003	0.0021	0.0034	0.0014	0.0018	0.0025	0.0034	0.002	0.0011	0	0.0004	0	0	0.0005	0.0006	0.0004
81873	ARPC5L	actin related protein 2/3 complex, subunit 5-like	2.027	3.4408	2.2512	3.5703	1.35	4.7889	1.2325	3.3914	1.8702	6.1101	2.0331	5.9525	0.5714	5.4297	3.1805	4.4009	1.9708	1.8023	1.6784	1.0304	2.8589	4.0436	0.3922	2.5012	1.6411	3.4238	3.0054	4.7349	0.7136	4.3872	1.0647	5.4709	1.163	4.3453	0.5324	7.7779	0.6587	3.5217	1.9025	4.2229	0.9739	0.3156	1.1379	4.1162	0.3097	3.2211	0.8673
10992	SF3B2	splicing factor 3b, subunit 2, 145kDa	0.6928	0.3291	0.5193	2.2677	1.0391	5.6215	0.7446	0.4397	0.8684	7.4796	0.4642	2.9797	0.0848	0.9754	0.8515	1.5635	1.0089	0.5039	0.5839	0.4486	0.9511	2.8758	0.364	11.4217	0.4607	0.6592	0.748	5.7368	0.8429	1.7422	0.759	0.7029	0.6757	10.5278	1.2145	11.2281	1.1686	0.5173	1.1397	7.7342	1.2141	0.2887	1.2938	6.3124	0.3648	2.276	0.1938
5239	PGM5	phosphoglucomutase 5	0.4478	0.3082	0.0718	0.7618	1.9435	0.6132	0.2311	4.2259	0.0141	1.6051	0.0109	1.1807	0.0197	1.6005	1.3316	1.1593	0.1374	0.3919	0.0326	0.723	0.8411	1.4312	0.1199	1.4756	0.2441	0.5659	0.3106	1.7716	0.1435	0.4578	1.6015	0.7446	0.0396	2.4605	0.5589	0.3446	0.184	2.4011	0.6433	0.3876	0.3972	1.119	0.8672	0.8628	0.7537	1.263	0.1941
139596	UPRT	uracil phosphoribosyltransferase (FUR1) homolog (S. cerevisiae)	0	0	0	0	0	0	0	0	0	0	0	0	0	0	0	0.0074	0	0	0	0	0	0	0	0	0	0.9433	0	0	0	0.2801	0	0	0	0	0	0	0	0	0	0.0155	0	0	0	0	0	0	0
283298	OLFML1	olfactomedin-like 1	0.0597	0.4326	0.1108	1.4926	0.8707	1.8234	0.3404	0.983	0.1575	4.6749	0	0.403	0	1.1182	0.2998	0.6425	0.0704	0.1651	0.1425	0.2928	0.6378	0.9371	0	0.8692	3.1813	1.963	0.2235	2.1462	0.0571	0.8906	0.3399	0.7812	0.1209	2.1993	0.4456	4.0777	0.6226	2.839	0.2429	0.5147	0.5677	0.2651	0.5803	1.0506	0	2.3684	0.1045
85437	ZCRB1	zinc finger CCHC-type and RNA binding motif 1	0.8175	0	0	0	0	0	0	0	0	0	0	0	0	0	0	0	0	0	0	0	0	0	0	0	0	0	0	0	0	0	0	0	0	0	0	0	0	0	0	0	0	0	0	0	0	0	0
60681	FKBP10	FK506 binding protein 10, 65 kDa	2.0012	0.0213	3.8428	0.0115	1.7545	0.0623	5.4946	0.0922	3.2604	0.4745	4.3372	0.0197	0.0136	0.0354	0.2748	0.0938	0.2167	0.0239	0.8	0.0297	0.4416	0.0422	0.5843	1.3786	8.746	0.02	0.2592	0.0387	0.4236	0.039	3.0098	0.0471	0.1704	0.3753	0.5289	0.0629	0.5997	0.033	0.823	0.0419	0.4488	0	2.229	0.0164	0.6961	0.3411	0.9337
729	C6	complement component 6	0.299	0.7498	0.5536	1.04	0.1183	1.0242	0.1392	1.0377	0.5932	0.5479	0.0347	0.3632	0.2382	0.862	0.7844	0.4577	0.6166	0.4337	0.2973	0.4018	0.5795	0.8743	0.158	0.7422	0.3461	0.3011	0.6398	0.5415	0.3869	0.4734	0.3356	1.6989	0.3755	1.1508	0.6142	0.561	0.1698	1.1857	0.0552	0.7329	0.4091	0.7518	0.1699	0.7259	0.6037	0.352	0.4188
124565	SLC38A10	solute carrier family 38, member 10	0.0605	0	0.0317	0	0.0074	0.0069	0.023	0	0.2386	0.0882	0.0051	0.0156	0	0.0118	0.0237	0.054	0.006	0.0396	0.0042	0	0.0081	0.0054	0	0.6951	0	0.0104	0.0165	0.0676	0	0.0069	0.0133	0.041	0	0.003	0	0.0094	0.0081	0.0139	0	0.011	0	0.0211	0	0.0065	0.0116	0.1742	0.1671
55691	FRMD4A	FERM domain containing 4A	0.0886	0	0	0	0.2765	0	0.0058	0	0	0	0	0	0	0	0	0	0	0	0	0	0	0	0.0003	0	0.0027	0	0.0079	0	0	0	0	0	0.0098	0.073	0.1092	0	0.0012	0	0.0959	0	0	0	0	0	0	0	0
51218	GLRX5	glutaredoxin 5	0.2461	3.5003	2.482	5.6229	5.6524	18.2943	2.437	8.6414	7.7645	5.7643	4.3691	7.0251	0.0849	7.115	0.3946	5.6243	0.3453	0.8834	0.104	0.9524	0.5636	4.2397	0.1742	3.5754	2.0255	3.7009	1.8717	11.3559	4.0595	14.1331	1.7509	11.8214	3.1392	16.2288	6.2288	15.1703	1.5528	14.9512	5.7787	10.8506	5.6289	1.2324	0.7944	4.4385	0.1866	2.9375	0.023
729454	LOC729454	destrin (actin depolymerizing factor) pseudogene 4	4.3377	0.0245	0.7255	0.4197	0.9197	0.4012	0.1085	0.141	0.1008	0.0981	0.2615	0.197	0.0529	0.2111	0.0309	0.0462	0.0429	0.0183	2.1392	0.4433	0.87	0.938	0.2162	0.9843	0.6231	0.4222	0.8768	0.8474	0.81	1.3001	1.1947	0.7413	0.186	1.2929	0.2984	0.4449	0.5519	0.8467	0.2176	0.161	0.1333	0.0304	0.1076	0.1147	0.0897	0.0535	0.1325
93343	MVB12A	multivesicular body subunit 12A	0.1228	0.5356	0.1071	0.2024	0.099	0	0.1696	1.4455	0.2208	2.6362	0.3389	3.9598	0.0679	3.1728	0.055	0.2852	0.1634	0.1089	0.0532	0.0365	0.1266	0.7125	0.0052	1.8782	0.1006	0.3896	0.0351	0.0268	0.0465	0.0794	0.0354	0	0.0621	0.3891	0.0287	0	0.1108	0.5109	0.1878	0.2227	0.0576	0	0.2739	0.7603	0.0728	0.2283	0.0778
149628	PYHIN1	pyrin and HIN domain family, member 1	0.413	0.0072	0.1677	0.0696	0.0758	0	0.3747	0.0983	0.4243	0.1572	0.0123	0.1053	0.0273	0.0887	0.3279	0.0359	0.0838	0.041	0.1489	0.0555	0.2845	0.0607	0.1203	0.017	0.2559	0.0762	0.2765	0.0712	0.2266	0.0179	0.1606	0.2659	0.1786	0.0728	0.1787	0.0064	0.2014	0.012	0.2336	0.1081	0.161	0	0.1936	0.039	0.1334	0.1103	0.1765
7278	TUBA3C	tubulin, alpha 3c	54.77	25.1513	47.9491	71.6204	73.873	62.0153	65.9548	60.8314	91.2397	102.045	97.2996	65.3672	8.8749	75.1972	57.2034	64.2175	42.7683	23.4568	33.1182	10.2881	61.1283	68.0461	10.8329	52.7655	43.1537	39.3461	36.2517	44.3271	38.7975	71.1506	53.1432	55.6161	15.559	58.5014	57.1495	42.1718	44.7737	45.4473	51.7464	32.0564	76.4407	27.6919	103.354	63.6926	44.9098	61.1291	37.6021
4784	NFIX	nuclear factor I/X (CCAAT-binding transcription factor)	0.0361	0	0	0.0179	0.0137	0	0.1138	0.1778	0	0	0.0919	0	0	0	0.0351	0	0	0	0.0146	0	0.0223	0.0092	0.0067	0	0.0088	0	0.0136	0.0046	0.0145	0	0.0179	0.0032	0.0129	0.0155	0.0088	0	0.0136	0	0.018	0.0041	0	0.0053	0.0821	0	0.0099	0.0093	0.0056
6229	RPS24	ribosomal protein S24	10.85	2.1445	7.3082	3.1045	5.1116	2.9866	4.4713	2.4621	14.8865	5.7692	15.8755	5.7042	1.9445	3.6329	9.9213	1.5855	4.5984	1.2623	4.5499	0.3706	9.4429	3.3927	2.7647	1.1968	5.9206	3.021	2.454	1.8672	1.5542	3.1754	2.5572	0.7157	5.2388	7.4026	10.5349	1.3121	8.2792	2.8649	11.2857	2.8154	12.1706	0.6612	5.2273	0.5894	5.5908	1.9201	4.211
26003	GORASP2	golgi reassembly stacking protein 2, 55kDa	1.1296	0.3782	0.9735	0.7194	1.7183	0.6379	1.1247	1.0792	1.9319	1.5026	0.8475	0.401	0.158	0.9671	0.35	1.5777	0.8079	0.4847	0.3412	0.2689	0.957	2.0932	0.2415	1.0723	0.6747	0.7877	0.194	0.42	0.3118	0.6557	0.4029	0.6586	0.2953	0.7795	0.7382	0.5684	0.7516	0.6228	0.5909	0.4976	2.2079	0.2271	0.508	0.4978	2.1856	1.3504	0.9579
8356	HIST1H3J	histone cluster 1, H3j	0.1946	0.0888	28.8678	3.8174	25.9656	10.7708	1.0879	0.8532	3.061	6.3553	10.3624	0.4782	1.2099	0.5284	0.6956	1.0116	2.3242	0.2727	13.817	2.9554	58.6521	2.7103	13.8759	2.6254	26.8715	2.8691	33.6198	17.5393	27.0328	4.2496	34.9979	9.6664	22.1318	16.7995	27.6694	7.1993	13.6609	4.2804	25.9108	9.6308	14.1453	0.8409	2.0187	0.2045	4.0565	3.0787	4.8478
253725	FAM21C	family with sequence similarity 21, member C	0.184	0.0268	0.0193	0.0784	0.0666	0.0428	0.1137	0.0296	0.0394	0.1412	0.0056	0.042	0.0106	0.0818	0.0342	0.0379	0.0586	0.0094	0.0091	0.0087	0.0502	0.0924	0.0105	0.1333	0.0198	0.056	0.0214	0.0995	0.0514	0.0557	0.0577	0.0724	0.0107	0.0718	0.0809	0.0843	0.0395	0.0879	0.0433	0.0355	0.0916	0.0315	0.0893	0.079	0.0837	0.0532	0.0435
654364	NME1-NME2	NME1-NME2 readthrough	28.5772	9.6366	9.8929	16.6759	22.4573	8.4642	19.4395	8.2706	44.8548	16.1728	59.9584	16.227	0.8785	6.4869	9.2307	18.0069	8.2344	7.1295	6.1325	4.8765	14.5619	18.8433	3.6585	14.4107	14.2522	7.6612	9.0532	9.5847	6.7735	16.1676	16.7108	12.8496	4.597	21.2904	20.8844	17.644	10.2626	15.5898	20.6823	10.1376	31.9845	3.34	38.0495	12.1179	15.6085	5.6486	4.5425
9097	USP14	ubiquitin specific peptidase 14 (tRNA-guanine transglycosylase)	1.8177	6.417	1.9477	7.5043	5.3476	8.5621	2.9458	4.0632	6.3345	5.9354	4.8874	7.5736	1.4969	6.8151	2.3478	10.5247	0.7716	0.4555	1.1393	2.4026	1.9312	4.4917	0.6284	6.1041	2.3995	6.2951	1.989	1.9165	2.2942	5.4873	3.0698	5.7029	0.5003	3.0279	4.1892	2.533	2.0845	1.1531	3.5741	1.8121	4.5165	8.3837	2.9186	6.7546	4.4688	4.8197	1.3635
8351	HIST1H3D	histone cluster 1, H3d	0.1946	0.0888	28.8678	3.8174	25.9656	10.7708	1.0879	0.8532	3.061	6.3553	10.3624	0.4782	1.2099	0.5284	0.6956	1.0116	2.3242	0.2727	13.817	2.9554	58.6521	2.7103	13.8759	2.6254	26.8715	2.8691	33.6198	17.5393	27.0328	4.2496	34.9979	9.6664	22.1318	16.7995	27.6694	7.1993	13.6609	4.2804	25.9108	9.6308	14.1453	0.8409	2.0187	0.2045	4.0565	3.0787	4.8478
2712	GK2	glycerol kinase 2	0	0.4975	0.0208	1.8304	0.0231	1.4489	0.0499	0.1876	0.0295	0.7411	0.0274	0.5206	0.0057	1.0235	0.0803	0.5552	0	0	0.0135	0.0048	0.0898	0.939	0.0074	0.3849	0.0268	0.9846	0	0.4823	0.0052	1.9627	0	0.8193	0.0199	0.5547	0.1399	0.8085	0.0806	0.6906	0.0229	0.1824	0.0504	0.8168	0.0279	2.3774	0.2911	0.607	0.0444
51258	MRPL51	mitochondrial ribosomal protein L51	0.3209	0	0.0884	0	0	0	0	0	0.1742	0.2011	0.3642	0.092	0	0	0.3821	0	0	0	0	0	0	1.304	0.0299	0.7127	0	0.2445	0	0	0	0	0	0.8627	0	0.8661	0.4554	0.7931	0	1.2582	0	0.0552	0	0	0.2556	0	0	0.3296	0
6737	TRIM21	tripartite motif containing 21	5.8244	0.2765	0.5745	0.1954	0.4506	0.1834	0.6392	0.4588	1.1244	0.186	0.7967	0.0403	0.0144	0.1596	0.2452	0.124	0.3464	0.036	0.6694	0.1667	0.3689	0.1669	0.0495	0.1713	0.2561	0.1203	0.1767	0.0151	0.1563	0.2144	0.1139	0.1667	0.318	0.0975	0.3602	0.0259	0.269	0.2221	0.4145	0.0253	0.1019	0	0.35	0.0345	0.473	0.0795	0.1506
57148	RALGAPB	Ral GTPase activating protein, beta subunit (non-catalytic)	0.0841	0.0134	0.0644	0.047	0.1626	0.1023	0.034	0.4278	0.1178	0.1223	0.4403	0.0574	0.03	0.1017	0.0084	0.0618	0.0917	0.021	0.1548	0.0477	0.0893	0.081	0.0167	0.1053	0.0401	0.227	0.09	0.075	0.0826	0.3157	0.0793	0.0853	0.0499	0.0912	0.0993	0.1074	0.1322	0.2218	0.1885	0.0224	0.0203	0.0059	0.0335	0.1111	0.1898	0.0384	0.1505
143098	MPP7	membrane protein, palmitoylated 7 (MAGUK p55 subfamily member 7)	0	0.8794	0	0.232	0	0.3458	0	1.4195	0	0.5273	0	1.475	0	1.1809	0.0683	0.545	0.0825	0.3232	0	0.3862	0	3.9383	0	3.242	0	0.5726	0	0.0163	0	0.7788	0	0.2367	0	1.0247	0.0038	0.8915	0	0.2037	0	0.3856	0	0	0	0.212	0	1.3174	0.0451
84661	DPY30	dpy-30 homolog (C. elegans)	4.0444	0.8633	2.4116	2.2069	3.0014	3.2357	4.6955	1.4247	2.115	3.4841	3.9045	3.4114	0.1997	1.2557	1.3516	0.7851	1.4172	0.6234	1.9125	0.2522	2.3247	2.9189	0.999	1.854	1.6397	1.9549	1.5339	0.9781	0.8424	1.61	3.2567	1.1197	0.8031	2.0705	1.8677	1.626	0.8127	1.3629	1.3529	1.3547	5.2473	0.7584	0.8417	2.3224	1.265	2.0159	0.9089
23170	TTLL12	tubulin tyrosine ligase-like family, member 12	0.966	0.438	0.2596	0.7499	1.1687	1.0204	7.166	0.5529	4.0661	6.6687	5.3072	1.797	0.4552	0.9162	4.8404	0.6082	0.4647	0.1502	1.0327	0.2135	2.811	1.249	0.1297	0.5391	3.1351	0.5247	0.5893	0.7438	1.0082	0.8909	1.3829	0.9406	0.3351	1.0584	1.8693	0.3659	0.8023	0.5133	1.738	0.3899	1.4212	0.1001	10.8852	3.2	1.7221	1.063	0.2603
7311	UBA52	ubiquitin A-52 residue ribosomal protein fusion product 1	31.6376	3.9484	23.1336	35.9621	24.1452	35.1362	38.1208	34.8162	32.6153	30.1678	23.2125	15.9336	2.6742	14.8042	14.7161	3.9167	8.0347	6.7481	17.9104	8.2203	45.2764	25.3132	31.1188	27.8107	71.4984	17.0025	49.353	24.8391	23.5999	33.7535	29.2219	26.7749	15.0633	45.9128	25.0258	12.7939	32.0718	26.107	39.169	17.4725	21.1917	8.2314	27.3141	15.0734	35.9793	34.8408	10.8619
9784	SNX17	sorting nexin 17	0.8422	2.2364	0.6002	1.2412	0.881	1.7017	0.6777	2.6771	2.5737	6.5154	1.2504	3.0078	0.0038	0.7394	1.5566	4.7897	1.2716	0.1539	0.1443	0.016	1.8981	2.5124	0.126	1.6942	2.8564	2.1344	0.1207	0.4733	0.3672	1.6609	0.1685	0.643	0.1535	1.1105	0.4891	1.4459	0.265	1.9568	0.5022	1.0433	2.5122	2.2889	1.0568	0.636	1.5755	3.9735	1.7173
51150	SDF4	stromal cell derived factor 4	0.1656	0.3006	0.0977	0.1582	0.1075	0.1931	0.1158	0.1334	0.158	0.1799	0.4739	0.1524	0.0574	0.5302	0.0343	0.1643	0.1112	0.0703	0.1084	0.0563	0.0577	0.3629	0.0091	0.0656	0.0431	0.1878	0.0804	0.1876	0.1729	0.2241	0.0906	0.4649	0.0541	0.269	0.0949	0.3273	0.0498	0.205	0.0975	0.1584	0.5539	0.2536	0	0.1067	0.1865	0.258	0.0893
340061	TMEM173	transmembrane protein 173	2.2386	0	0.3325	0	0.0434	0	1.3592	0.1009	0.4647	0.2076	0.206	0	0.2929	0.3399	0.382	0.1782	0.2091	0.0036	0.0894	0	0.592	0.0475	0.0303	0.0073	0.3663	0.0082	0.2495	0.046	0.1404	0.0278	0.1885	0.0373	0.149	0.0729	0.5673	0.0098	0.1888	0.0487	0.2502	0.0195	0.0718	0	0.0078	0	1.014	0.2844	0.218
57634	EP400	E1A binding protein p400	0.0111	0.0003	0	0	0.0008	0	0	0	0.0017	0.0131	0	0	0	0	0.0111	0	0.0042	0	0.0021	0	0.0059	0.0033	0.001	0	0.0083	0.0005	0.0005	0.0188	0.0136	0	0.0019	0	0.0011	0.0017	0.0017	0	0.0012	0.0016	0.0067	0.001	0	0	0.0014	0	0.0019	0.0026	0.0016
22949	PTGR1	prostaglandin reductase 1	8.0095	22.895	6.7783	15.6091	26.8808	70.6642	30.1322	22.5009	2.7685	17.8203	11.0233	21.5919	3.514	21.6581	8.1956	46.2514	16.5695	9.0764	5.3001	5.2797	14.9556	47.8925	1.194	43.638	2.9296	5.8343	15.0405	26.7599	13.6611	43.9735	14.8446	22.4463	3.3495	41.5788	6.5172	22.5572	12.9549	46.9691	47.8956	35.5017	9.608	9.0112	23.5875	45.1675	13.6537	43.7375	7.3194
3818	KLKB1	kallikrein B, plasma (Fletcher factor) 1	0.115	0.2081	0.5873	0.0323	0.0241	0.0411	0.0442	0.2849	0.1015	0	0	0.0391	0.0851	0.1114	0.1921	0.0318	0.5505	0.1579	0.4885	0.2953	0.1125	0.1574	0.0526	0.1128	0.9353	0.0073	1.3378	0.5156	0.8115	0.1479	1.2162	0.5989	0.0469	0.1137	0.6927	0.6701	0.1844	0.1557	0	0.2421	0.0921	0.1941	0.0345	0.0599	0.7311	0.2878	0.7402
1264	CNN1	calponin 1, basic, smooth muscle	1.8255	0.9442	0.2839	5.6562	15.0228	0.6724	0.7047	32.7251	6.4384	5.4887	0.0087	3.8353	0.0702	2.8415	10.0375	4.1696	3.2075	0.4351	0.5643	0.7516	2.0943	4.3292	0.0856	4.4792	3.1485	1.1113	1.9758	10.1843	0.5019	1.3594	12.014	3.4016	0.6891	17.9651	1.0569	0.711	1.4768	52.3803	1.5862	1.5609	1.9542	1.7986	1.0217	0.3687	0.5529	3.1393	0.4865
51091	SEPSECS	Sep (O-phosphoserine) tRNA:Sec (selenocysteine) tRNA synthase	0.026	0.1414	0.185	0.7578	0.1777	0.6613	0.6359	0.251	0.0612	0.3666	0.2806	1.6471	0.155	0.7289	0.2724	0.4882	0.3692	2.1237	0.4955	0.1304	0.7317	1.1266	0.041	0.6071	0.2605	0.4458	0.2712	0.2642	0.3484	0.3866	0.3059	0.4783	0.15	0.378	0.3377	0.5046	0.2095	0.3166	0.2735	0.2233	0.3152	0.108	0.3744	0.2734	0.4444	0.1076	0.1135
53938	PPIL3	peptidylprolyl isomerase (cyclophilin)-like 3	1.2042	0.5488	0.3666	3.8688	1.174	0.4072	1.1187	1.0819	1.8254	1.0673	0.4809	3.1859	0.2925	1.4204	0.9128	0.9768	0.8467	0.5916	0.4132	0.2635	0.3845	3.1342	0.2093	0.75	0.7828	0.6156	0.7983	0.6089	1.0044	0.937	0.6342	0.585	0.3654	0.7988	1.5597	0.5642	0.676	0.6812	0.8236	6.6329	1.1323	0.4403	2.2945	0.8272	1.3694	0.7338	0.502
950	SCARB2	scavenger receptor class B, member 2	1.3633	0.8981	3.6694	1.4132	3.6829	1.7212	3.4785	1.4793	3.4675	2.8471	5.4482	1.6293	0.6283	1.5626	0.618	1.8056	1.7286	0.8523	0.5006	0.2957	1.2047	1.5695	0.479	2.0935	1.3979	0.6906	1.5246	1.4558	2.6509	2.3488	1.4238	1.2678	1.4175	2.0405	2.017	1.3998	2.1053	2.5356	1.937	1.6652	0.7328	0.6805	3.3782	1.1076	3.8437	2.7041	0.8782
26135	SERBP1	SERPINE1 mRNA binding protein 1	5.0462	0.3707	1.795	1.9738	0.8665	0.1301	1.7165	0.163	0.6048	0.5667	1.0477	1.6268	0.0618	0.1159	1.3804	0.3721	1.3121	0.2943	2.632	1.0005	2.6799	2.1669	0.4734	1.6936	1.0148	0.3708	0.6934	0.4488	0.6236	0.5211	0.8976	0.4302	0.2288	0.4506	0.4613	0.2363	0.3538	0.186	0.7021	0.3521	2.0989	0	2.0054	0.3172	0.5925	0.3173	0.1757
8738	CRADD	CASP2 and RIPK1 domain containing adaptor with death domain	0.4464	0.873	0.2715	0.1936	1.0987	0.1035	0.8891	0.2484	0.6185	0.4574	0	1.496	0.0349	0.55	0	0.1148	0	0.0323	0.0167	0.0555	0.1538	0.4484	0.0592	0.237	0.0503	0.3993	0.1932	0.1764	0.0844	0.7318	0.015	0.2208	0.0209	1.1133	0.075	0.6168	0.3861	0.4705	0.949	0.3569	0	0.1153	0.2155	1.5473	0.1302	0.1904	0.084
5977	DPF2	D4, zinc and double PHD fingers family 2	0.185	0.0152	0.0489	0	0.0349	0	0.1298	0.2626	0.1138	0.0778	0.0193	0.0458	0.0115	0.0654	0.1343	0	0.0169	0.042	0.0213	0	0.187	0.0615	0.0463	0.11	0.0785	0	0.0786	0.0776	0.0679	0.0272	0.187	0.0708	0.071	0.1565	0	0.1095	0.0361	0.0358	0.0426	0.1539	0	0	0.0765	0.0071	0.0854	0.2849	0.1306
1306	COL15A1	collagen, type XV, alpha 1	3.3572	0.4181	2.322	0.9439	6.1597	3.3313	1.2172	1.9645	1.127	2.4805	0.6039	1.6457	1.0013	1.4767	3.6463	3.0833	1.0538	0.5644	1.6241	0.53	5.6417	1.5907	4.9125	1.0303	5.5773	0.6059	1.7687	4.272	0.8496	0.6763	2.3311	0.685	1.4197	2.0657	5.9176	1.6639	3.2382	3.4032	3.3391	0.8487	1.1995	0.2484	0.8981	0.5637	0.2005	1.6286	2.0517
282969	FUOM	fucose mutarotase	0.7159	0.6809	0	0.4381	0	0.6248	0.3904	0.1708	0	0.2407	0	0.737	0	0.5583	0	7.1313	0.0533	0	0	0	0.1889	2.8896	0	1.3441	0	0.5286	0	0.1378	0.0611	0.9316	0	0.8546	0.1592	0	0.3107	0.3046	0	0.5236	0.1492	0	0.4697	0.9733	0	0.7759	0.1043	0.1355	0
10383	TUBB4B	tubulin, beta 4B class IVb	67.5549	54.1352	59.6296	108.629	86.9344	111.366	100.137	93.9605	122.021	161.874	104.176	99.4189	12.1754	114.036	70.6512	110.53	61.5669	23.5067	40.4795	13.5454	65.3605	118.594	10.5899	81.6431	47.4613	60.0959	37.3208	63.9606	48.0739	124.626	53.2002	70.466	23.9656	86.4879	61.2859	76.256	57.5647	96.5451	61.5563	58.7673	79.3554	37.3428	117.404	107.403	71.4293	95.1566	45.0688
7327	UBE2G2	ubiquitin-conjugating enzyme E2G 2	0.0582	0.1256	0.088	0.1811	0	0	0.232	0.1167	0.233	0.3441	0.2141	1.1848	0.0089	0	0.2652	0.5657	0.3379	0.0409	0.1113	0.0316	0.4377	0.8792	0.1708	0.1555	0	0.223	0	0.0471	0	0	0	0	0	0.1449	0	0.1042	0.0534	0	0.1739	0.1073	0.2905	0.0378	0	0.1644	0.075	0.2109	0.0808
857	CAV1	caveolin 1, caveolae protein, 22kDa	19.5478	0.6989	29.1783	1.3834	50.4941	0.7145	10.4212	9.2813	72.4871	13.1564	7.8287	1.4469	1.5159	1.6353	5.091	3.023	2.2055	1.5457	8.916	2.489	35.015	2.6331	10.1718	1.7147	32.6225	0.272	27.8657	4.8406	58.113	1.7336	31.0717	2.33	7.456	5.8612	13.124	1.7215	10.4958	5.1382	41.5843	3.4136	11.7079	0.4409	25.9971	0.4299	6.2693	9.561	8.5992
11001	SLC27A2	solute carrier family 27 (fatty acid transporter), member 2	0.8931	5.5121	0.7831	7.7067	0.9734	13.7026	0.5139	5.3761	0.7817	7.7719	0.1129	7.0058	0.8717	5.4364	2.0569	8.9333	3.1175	0.2904	0.7648	0.0332	2.2116	11.8224	0.5077	10.8661	0.6315	6.2007	0.3155	7.4584	1.6407	9.7116	1.4103	11.315	1.3061	8.2514	1.9665	9.6895	0.9033	8.0534	0.9844	4.4944	4.0113	4.4271	0.2526	10.3394	1.9564	2.5543	2.2229
5160	PDHA1	pyruvate dehydrogenase (lipoamide) alpha 1	2.1199	10.6688	3.6191	44.1868	30.0041	54.6694	6.2308	50.7015	13.6231	26.7714	9.9828	47.5681	0.3792	59.108	7.1264	64.9582	6.4717	43.7597	1.5922	14.1203	3.6213	18.6232	1.0723	30.2995	2.9337	14.6164	19.9137	49.3615	11.7253	56.7343	8.9501	52.0021	6.8597	36.1195	22.4548	36.0202	8.8043	37.2975	17.1801	29.9255	18.4923	16.3149	6.9358	37.1457	3.9057	31.1058	1.1725
10906	TRAFD1	TRAF-type zinc finger domain containing 1	0	0	0	0	0	0	0	0	0	0	0	0	0	0	0	0	0	0	0	0	0	0	0	0	0	0	0	0	0	0	0	0	0	0	0.0095	0	0	0	0	0	0	0	0	0	0	0	0
90390	MED30	mediator complex subunit 30	0.2829	0	0.1163	0	0.147	0	0.569	0	0.4828	0.6668	0.4183	0	0	0	0	0	0	0	0	0	0.7983	0.6325	0	0.3139	0.5306	0.3209	0.0401	0	0.0735	0	0.105	0	0.0475	0.0902	0.1346	0	0.0604	0.0716	0	0	0	0	0.4264	0	0.1604	0	0
29886	SNX8	sorting nexin 8	0.0526	0.2333	0.0485	0.2067	0.7585	0.2706	0.3501	0.1588	0.7782	1.6552	0.429	0.3074	0.0025	0.3265	0.0889	0.2205	0.2691	0.1231	0	0	0.2292	0.5395	0.024	0.3097	0.19	0.1978	0.1117	2.3926	1.1627	0.5461	0.5635	2.4599	0.1524	0.4993	1.8404	0.5003	0.2129	0.2948	0.6098	0.2465	0.2916	0.2873	0.1542	0.1083	0.4158	0.0752	0.1036
8886	DDX18	DEAD (Asp-Glu-Ala-Asp) box polypeptide 18	0.2853	0.0615	0.4142	0.0582	0.6682	0.0353	0.4687	0.2002	0.1478	0.1581	0.6902	0.1398	0.0547	0.064	0.8712	0.188	0.202	0.0125	0.2671	0.0096	0.1655	0.2286	0.0787	0.364	0.1915	0.0621	0.3102	0.1162	0.3425	0.2472	0.6215	0.0424	0.2315	0.2733	0.6932	0.168	0.2654	0.2045	0.5631	0.2141	0.5533	0.1411	0.1589	0.0742	0.4501	0.1485	0.223
5684	PSMA3	proteasome (prosome, macropain) subunit, alpha type, 3	15.5993	3.3533	9.3826	11.2897	7.3421	7.3727	13.3112	3.3812	11.376	6.6919	10.7536	7.2966	1.8947	7.0074	7.6672	8.049	9.5011	2.3316	4.3224	1.3556	8.8056	9.2163	1.4195	5.9579	8.3317	6.2818	5.6609	4.5919	8.0229	10.1932	8.2597	7.2441	3.1565	5.8441	6.7606	6.1971	7.5179	4.3892	11.9133	3.8979	6.5815	2.0484	15.4514	7.4202	4.646	3.0435	4.2205
653505	PPIAL4B	peptidylprolyl isomerase A (cyclophilin A)-like 4B	15.2803	11.3715	22.1393	18.526	22.0357	11.5794	27.5505	27.4947	35.106	35.9562	27.7639	4.8443	1.3576	30.3053	24.7345	39.7226	22.3541	12.3237	13.6214	1.4017	23.6697	12.5209	6.3805	13.5474	23.6136	3.0289	15.6814	12.2472	16.974	18.5403	23.2067	15.8095	7.4847	17.2604	25.6256	14.9211	19.2175	15.5173	20.9173	11.9913	47.2382	27.0321	39.5885	22.6817	91.2488	36.0747	23.8771
10677	AVIL	advillin	0.0325	0.1989	0.0142	0.3276	0.0073	0.2948	0.0046	0.323	0	0.2365	0	0.389	0.0194	0.5886	0.0249	0.463	0.1088	0.0125	0.0826	0	0.0288	0.7537	0.0033	0.8581	0.0057	0.5034	0.0216	1.0457	0.0299	0.389	0	0.322	0.0199	0.2436	0.0189	0.108	0.0573	0.3672	0	0.0472	0	0.1764	0	0.3582	0.0213	0.1107	0.0262
51390	AIG1	androgen-induced 1	0.4862	0.1471	1.0225	1.3528	0.2842	0.251	0.3716	0	0	0.059	0.2901	0.572	0	0	1.4027	0.6271	1.8839	0.0977	2.4777	0.1059	0.9599	5.1759	0.2658	5.1351	0.6494	2.663	0	0	0.0947	0.0531	0.0347	0.2875	0	0.0378	0.8386	0.5131	0.2614	0	0.0199	0	0.1882	0.2516	0.0405	0.5453	0.1682	0	0
284273	ZADH2	zinc binding alcohol dehydrogenase domain containing 2	0.0201	0.2461	0	0.8684	2.2558	5.0288	0.0579	1.1165	0.0868	0.9242	0.0509	1.1496	0.0103	1.2582	0.0123	0.3569	0.0213	0.1142	0.1154	0.125	0.0789	1.3641	0.0188	1.0043	0.0737	1.2544	0	1.4178	0.0526	2.6765	0.0526	1.4346	0.5268	7.877	0.1089	1.2313	0.0327	6.9822	0.0342	1.2445	0.1725	0.1833	0.0451	0.2726	0.0901	1.0153	0.049
114569	MAL2	mal, T-cell differentiation protein 2 (gene/pseudogene)	1.5755	7.2927	1.8799	8.8732	5.7945	7.8968	3.7459	16.6288	1.6239	17.3439	5.9119	6.1473	0.4834	3.8334	1.3049	13.6627	3.8113	12.1052	2.4856	15.6262	0.3508	8.1346	0.1494	9.0438	0.9848	4.5799	3.7246	11.3588	1.3803	6.7098	0.2384	14.0301	0.3461	6.906	0.8028	5.4369	0.2885	7.3068	1.438	14.4063	0	21.0273	1.6739	5.127	0	33.5844	0.7465
23305	ACSL6	acyl-CoA synthetase long-chain family member 6	0.1141	1.4395	0.1109	0.0165	0	0.6639	0.1169	0.0291	0.028	0.0783	0	0	0	0.0222	0.098	0.0781	0	0.0132	0.0034	0.0049	0	0.3148	0	0.4298	0.0731	0.1736	0	0.0059	0	0	0	0.0522	0.0123	0.0111	0.0642	0.009	0	0	0	0.0246	0.2302	0.0644	0.1526	0.2643	0.0035	0.0086	0
64759	TNS3	tensin 3	0.4494	0.9109	0.1303	0.3815	0.1204	0.6044	0.2764	0.3387	0.6729	0.9652	0.7183	0.4282	0.0139	0.5765	0.334	0.3184	0.2202	0.4415	0.0798	0.1092	0.3075	0.4995	0.0406	0.4127	0.1731	0.3752	0.1318	0.8277	0.8909	1.6559	0.322	0.2539	0.2285	0.6873	0.3835	0.6247	0.147	0.4319	0.3007	0.415	0.4536	0.2451	0.455	0.8794	0.4797	0.4504	0.1973
210	ALAD	aminolevulinate dehydratase	1.1984	8.1939	0.4145	7.0961	1.4446	23.1343	1.646	5.4492	1.0411	14.9368	1.745	16.2441	1.1234	8.0016	2.5052	21.4867	1.9776	3.8831	1.6666	1.5897	1.4752	13.4996	0.94	14.6828	2.4963	13.7738	1.9581	4.9463	1.4234	22.0617	1.9373	11.5686	1.374	7.4244	1.8142	13.1966	2.6122	10.2526	2.185	4.8794	0.7193	5.3769	0.9551	9.4781	2.4807	4.7584	1.242
9775	EIF4A3	eukaryotic translation initiation factor 4A3	11.021	0.982	5.277	3.9341	3.8568	1.8628	7.3832	1.9281	6.2775	4.1252	11.0056	2.093	0.2993	1.7137	7.3829	6.3534	7.198	2.6396	7.8112	1.7169	6.3614	8.9067	1.3161	8.5534	1.9877	4.4797	1.5255	2.0158	1.7127	2.8374	3.2187	2.2951	0.7353	5.0092	1.9605	5.3834	1.6856	1.5762	3.2477	1.8974	3.4754	0.5522	5.8579	4.5529	1.063	2.2351	0.7314
1120	CHKB	choline kinase beta	0.2346	0.0524	0.0141	0.1309	0	0.1627	0.0317	0.0835	0.01	0.1598	0.0569	0.074	0.0066	0.2308	0.0803	1.3054	0.0716	0.0524	0.0095	0.0149	0.0174	0.0431	0	0.0141	0.1026	0	0.0146	0.0547	0.0381	0.1261	0.1945	0.2444	0.0201	0.2913	0.1717	0.2133	0.061	0.063	0.1913	0.0941	0.1141	0.0755	0.0516	0.0478	0.2477	0.3149	0.1194
4297	KMT2A	lysine (K)-specific methyltransferase 2A	0.0224	0	0.0176	0	0	0	0	0	0	0	0	0	0	0	0	0.0343	0	0	0	0	0	0	0.0007	0	0.0058	0.0011	0	0	0	0	0	0	0	0	0	0	0	0	0.0098	0	0	0	0	0	0	0.4513	0.1726
23085	ERC1	ELKS/RAB6-interacting/CAST family member 1	0.7264	0.1039	0.4366	0.4089	0.4776	0.5056	0.4044	0.2337	0.2256	0.2162	0.6535	0.2308	0.0127	0.134	0.5058	0.2644	0.201	0.1046	0.4527	0.1477	0.8478	0.6324	0.2379	0.0371	0.2271	0.3118	0.1159	0.2266	0.1323	0.2228	0.0816	0.1095	0.0847	0.2513	0.2703	0.0285	0.2533	0.1873	0.2508	0.1198	0.0601	0.1105	0.252	0.0555	0.1096	0.2914	0.1522
9274	BCL7C	B-cell CLL/lymphoma 7C	0.0761	0.0299	0.0628	0.0879	0.0474	0	0.4382	0.1275	0.0728	0	0.0581	0.1123	0	0.0828	0.3004	0	0.2103	0	0.4772	0.073	0.135	0	0.0312	0.06	0.0694	0	0.0099	0.0916	0.0501	0	0	0	0	0	0	0	0.0795	0	0	0.0364	0.1888	0.0154	0.2484	0.033	0.2109	0.0792	0.024
51596	CUTA	cutA divalent cation tolerance homolog (E. coli)	16.3369	4.5269	6.0205	7.7027	21.7516	14.6138	7.088	15.7287	17.0386	14.654	20.3427	7.5753	5.0187	9.1838	9.2747	15.3534	6.427	3.9155	3.3733	6.6248	9.3346	5.8975	5.778	11.6678	6.783	4.9488	11.9049	14.2543	9.8147	18.6067	16.2873	8.7359	9.9866	24.1426	16.1436	13.9539	12.8442	23.6209	16.1608	5.2966	18.5697	3.7837	30.0466	7.0892	2.588	10.7356	5.4054
23678	SGK3	serum/glucocorticoid regulated kinase family, member 3	0.0283	0.0225	0	0.0167	0.0303	0.0838	0.0349	0.0049	0.0644	0.243	0.0713	0.0733	0.0085	0.0059	0.0139	0.0797	0	0	0	0	0.022	0.2048	0.0047	0.032	0.0145	0.1063	0.0171	0.006	0.0071	0.0044	0.0264	0.0434	0.0219	0.136	0.0197	0.0136	0.012	0.0166	0.0165	0.0056	0.0368	0.0222	0	0.0056	0.0054	0	0
29114	TAGLN3	transgelin 3	0.3662	0.5845	0.0331	0.0565	0	0.169	0.1023	0.355	0.2312	0.5183	0.1333	0.3454	0	0.1645	0	0.0459	0	0.1038	0.0395	0.1598	0.2448	0.2337	0.0269	0.1078	0.0898	0.0999	0.0927	0.1338	0.0698	0.1379	0.1433	0.2503	0	1.0615	0.1635	0.6145	0.0944	0.3585	0	0.854	0	0	0.1204	0.0442	0	0.4269	0
9938	ARHGAP25	Rho GTPase activating protein 25	0.0214	0.0208	0.0238	0	0.1406	0	0.1478	0.0214	0.1036	0.0848	0.0621	0.0205	0.0109	0.0034	0.0506	0	0.1851	0.0138	0.0122	0	0.097	0.0356	0.0019	0.0046	0.0924	0	0.0515	0.0181	0.0537	0	0.1567	0.0205	0.0603	0.0526	0.0781	0.0174	0.2425	0.0326	0.1683	0	0.151	0.0152	0.0672	0	0.0689	0.0602	0.0459
5825	ABCD3	ATP-binding cassette, sub-family D (ALD), member 3	0.4039	1.1006	0.2705	1.5705	0.4998	2.0895	0.8199	1.253	0.4385	0.8941	0.2699	2.7102	0.098	1.6494	0.4335	3.1243	0.6745	0.2845	0.2031	0.0547	0.2802	2.4884	0.0898	7.1666	0.2008	1.272	0.0487	1.0928	0.1562	1.2491	0.2235	2.0373	0.4046	1.2699	0.5017	1.3361	0.241	1.66	0.1685	1.0916	0.4761	1.9613	0.6363	1.3444	1.0554	1.2184	0.2857
4179	CD46	CD46 molecule, complement regulatory protein	0.0751	0.3847	0.5562	1.2426	0.0794	0.4056	0.3941	0.2612	0.2449	0.8095	0.3304	0.6423	0.0044	0.3151	0.3411	0.8926	0.1537	0.2559	0.0433	1.0925	1.2728	1.2928	0.4447	1.7083	0.6728	1.1959	0.5182	0.377	0.5738	2.3734	0.7015	0.956	0	0.5816	0.7847	0.626	0.2786	0.6415	0.3784	0.4005	0.0169	0.2874	0.3681	0.5617	0.2735	0.669	0.028
51232	CRIM1	cysteine rich transmembrane BMP regulator 1 (chordin-like)	0	0	0	0	0.1386	0	0	0.0029	0	0.1106	0	0	0	0	0	0.0085	0	0	0	0	0	0.0264	0	0	0	0	0	0	0	0.0161	0.029	0	0.2786	0.1617	0	0	0.2032	0	0	0	0	0.0078	0	0.0031	0	0	0
4512	COX1	cytochrome c oxidase subunit I	0.0614	0.7888	0.1648	0.6325	0.6074	1.9545	0.3092	1.5215	0.4411	0.5402	0.6782	3.8212	0	1.2337	0.0738	1.5585	0.0092	1.1744	0.2407	0.4339	0	3.091	0.0097	2.5885	0.1561	1.2015	0	0.9946	0.1043	1.8058	0.081	2.4285	0.0866	1.6375	0.3772	0.7899	0.0465	3.6139	0.1511	1.6118	0.0242	1.0894	0.2718	1.0837	0.0669	2.2445	0.1404
54102	CLIC6	chloride intracellular channel 6	2.9709	0.4275	1.0301	0.1556	0.1139	0.2946	1.7251	0.0261	1.7367	0.6195	0.0666	0.7271	0.0406	0.0639	0.0498	0.0171	0.0477	0.0027	0.0026	0.0045	0.1677	0.2357	0	0.1876	0	0.4412	0.0403	0.1854	0	0.3274	0.578	0.4376	0.0599	0.103	0.0959	0.1639	0.0815	0.1225	1.0953	0.4246	0	0.1012	0	0.167	0.24	0.0398	0.0223
55577	NAGK	N-acetylglucosamine kinase	9.5901	1.4154	3.1916	2.6221	7.0925	3.7512	8.8712	2.6367	6.8044	5.4588	5.3547	3.0147	0.4758	1.9805	2.8047	2.4611	2.8457	0.6247	1.612	0.9214	5.6476	2.852	1.5141	3.294	5.7237	1.4543	2.3474	2.0192	2.4376	2.5032	2.3917	2.7115	2.3448	3.6121	5.0656	2.01	4.1669	1.4208	3.6271	1.9651	3.8929	1.5251	3.1838	4.234	5.2581	1.4537	3.0325
9639	ARHGEF10	Rho guanine nucleotide exchange factor (GEF) 10	0.0548	0	0.0301	0.0067	0.0814	0	0.2297	0.0047	0.0444	0.0058	0.1599	0	0	0	0.0331	0	0.0476	0.0027	0.0332	0	0.0049	0	0.0018	0	0.0264	0.0118	0.0024	0	0.0036	0	0.0443	0	0.0025	0	0.0431	0	0.0134	0	0.0097	0	0.0032	0	0.0467	0	0.0525	0	0
63916	ELMO2	engulfment and cell motility 2	0.1822	0.0356	0.073	0.0516	0.8105	0.6225	0.2985	0.1015	0.212	0.1548	0.462	0.1186	0.0115	0.0632	0.3552	0.0601	0	0.0438	0.0135	0.0264	0.1099	0.1028	0.0238	0.0439	0.1166	0.0472	0.0602	0.4569	0.046	0.1101	0.5796	0.0979	0.3782	0.1748	1.1185	0.1029	0.619	0.1117	0.4591	0.1342	0.1307	0.0213	0.0853	0.037	0.3544	0.1172	0.097
84457	PHYHIPL	phytanoyl-CoA 2-hydroxylase interacting protein-like	0.7671	0.0277	0	0.0153	2.2773	0.0389	0.0848	0.0634	0.0465	0.0252	0	0.2056	0	0.6205	0.5726	0.1254	0.2222	0.1124	0.7226	0.0278	0.006	2.6735	0	0.0465	0.0221	0.7371	2.7751	0.1032	2.002	0	5.4836	0.0986	1.4958	2.1293	0	0.4369	3.9707	0.0361	0	0.0412	0.0316	0.0402	0.2904	0.2343	0.0363	0.1458	0.009
26090	ABHD12	abhydrolase domain containing 12	0.1942	0.0424	0.4545	0.6315	1.1761	0.2872	0.1778	0.1413	0.9386	0.2525	0.4161	0.1097	0.0166	0.0535	0.0773	0.2772	0.3425	0.2388	0.0151	0.0989	0.2083	0.1813	0.0568	1.3426	0.0977	0.0525	0.0965	0.2171	0.1295	0.364	0.0994	0.106	0.1538	0.3297	0.3985	0.1581	0.1699	0.5493	0.1614	0.2366	0.0216	0.1309	0.066	0.0901	0.4501	0.2968	0.0729
272	AMPD3	adenosine monophosphate deaminase 3	0.0876	0.6393	0.0492	0	0.2181	0	1.1748	0.096	0.2977	1.047	0.0593	0.0102	0.0255	0.0568	0.2176	0.5584	0.0887	0.0534	0.217	0.0671	0.2627	0.5774	0.0656	0.052	0.1065	0.0079	0.0262	0	0.0339	0.0378	0.0145	0.172	0.0306	0.0225	0.0556	0	0.1177	0.0068	0.2744	0.0052	0.0352	0.0138	0.1224	0.1295	0.2301	0.117	0.016
2071	ERCC3	excision repair cross-complementing rodent repair deficiency, complementation group 3	0.0087	0.0048	0.0041	0	0.0432	0.0115	0.007	0.0057	0	0.0088	0.0288	0.0103	0.0026	0	0.0275	0.0167	0	0	0.0148	0	0.0102	0.0067	0.0052	0.0059	0.0109	0.0042	0.0258	0.006	0.0191	0.0113	0.0327	0	0.0201	0.035	0.0848	0.0334	0.0435	0.006	0.0618	0.006	0.017	0	0	0	0.009	0.0076	0.0035
84498	FAM120B	family with sequence similarity 120B	0.138	0.4047	0.3235	0.1297	0.4701	0.632	0.0129	0.4491	0.2359	0.3003	0	0.29	0	0.2129	0.2414	0.2038	0.1517	0.1071	0.0987	0.0742	0.2637	0.0254	0.0533	0.5869	0.1013	0.1047	0.0054	0.0372	0.005	0.189	0.0149	0.0057	0.008	0.1615	0.021	0.1159	0.0293	0.0839	0.1683	0.1964	0.0076	0.1354	0.1258	0.5094	0.6183	0.2229	0.0025
11284	PNKP	polynucleotide kinase 3'-phosphatase	0.1159	0.0339	0.0321	0.0529	0.1531	0.0572	1.4517	0.7736	0.2634	1.5118	0.0487	1.0246	0	0.1374	1.8491	0.1899	0.0265	0.7928	0.0167	0.2611	0.0421	0.0621	0.0488	1.2637	0.6915	0.1035	0.0595	0	0.289	0.2076	0.14	0.2007	0.1213	0.6322	0.6834	0.1523	0.2481	0.0889	0.232	0.2947	0.7858	0.8352	0.0788	0.7217	0.9272	0.792	0.5821
51622	CCZ1	CCZ1 vacuolar protein trafficking and biogenesis associated homolog (S. cerevisiae)	0.0471	0.0277	0.0898	0.0201	0.0939	0	0.1438	0.0145	0.214	0.0115	0.3934	0.0079	0.0063	0.0645	0.0295	0.0136	0.0284	0.0178	0.0056	0.0057	0.0574	0.3102	0.0044	0.0462	0.0624	0.1368	0.0343	0	0.0482	0.0209	0.0367	0	0.0154	0.4555	0.0976	0.0481	0.0087	0.147	0.0624	0.1307	0.0851	0.0341	0.026	0.0446	0.0238	0.0164	0.0814
80301	PLEKHO2	pleckstrin homology domain containing, family O member 2	0.4927	0.0316	0.1151	0.1175	0.8141	0.517	0.2463	0.0447	0.3823	0.2648	0.0201	0	0.026	0.0329	0.4587	0.0331	0.2985	0	0.1568	0.0199	0.5088	0.0364	0.1233	0.0496	0.2747	0.0379	0.1032	0.021	0.6547	0.654	0.9073	0.0337	0.507	0.5836	0.8734	0.4218	0.6127	0.5198	0.6768	0.4244	0.203	0	0.1474	0.0249	0.3692	0.0946	0.3338
10484	SEC23A	Sec23 homolog A (S. cerevisiae)	1.9021	2.0194	2.8533	0.9057	1.593	1.2684	1.5383	0.5711	1.0764	3.9285	1.6396	3.3165	0.3028	0.9033	4.7964	1.7877	1.643	0.123	0.866	0.439	1.973	1.1405	0.3236	0.6323	0.8856	1.83	0.9188	0.5689	1.6173	1.2439	2.1595	0.9772	0.8213	0.7434	2.1096	0.5925	1.5333	0.7261	1.8486	0.5679	2.3529	1.0997	2.6385	0.7732	1.6426	0.812	0.6642
56984	PSMG2	proteasome (prosome, macropain) assembly chaperone 2	0	0.0224	0.0482	0.0157	0.1005	0.0523	0	0.0165	0.1135	0.0582	0.2023	0	0	0	0.0407	0.0163	0	0.0088	0	0.0052	0.0365	0.014	0	0.0926	0	0	0	0	0	0.0124	0	0	0	0	0	0	0.0398	0.0409	0	0.0279	0	0	0.0509	0	0.1778	0	0.0477
2664	GDI1	GDP dissociation inhibitor 1	13.7598	3.4126	6.5575	6.1986	11.7949	6.5325	15.6079	7.2166	12.1492	9.3767	8.6605	9.4123	1.7587	6.5828	7.2056	7.513	5.7924	3.7872	4.8325	1.9978	6.4301	8.4148	2.3437	7.7365	6.1227	5.2219	4.1275	4.6621	7.4967	6.4497	13.4963	6.4368	3.1692	5.6909	10.2555	4.4698	9.6035	6.1602	8.4948	4.0824	10.3366	4.3656	16.4774	6.1096	15.9871	7.1053	5.0457
64949	MRPS26	mitochondrial ribosomal protein S26	0.7419	0.2309	0.4381	0.9533	1.1558	0.38	0.0117	0.4424	0.2507	0.5374	0.8273	1.1859	0.0088	0.4998	0.4767	1.1003	0.6439	0.0856	0.2595	0.17	0.9265	1.2812	0.0704	2.7648	0	0.4511	0	0.0896	0.038	1.5368	0	1.155	0.0322	1.7713	1.2416	0.7642	0	1.0293	0.6486	2.1599	0.8708	0.2845	0.5257	0.3621	0	0.2316	0
8802	SUCLG1	succinate-CoA ligase, alpha subunit	2.643	41.9794	2.0343	40.872	6.5495	119.148	3.051	18.7873	7.9075	32.5621	3.435	19.4864	0.794	60.0942	3.7247	44.1528	2.1135	11.1433	1.4682	8.0184	2.2255	55.7227	1.0833	54.9104	1.5445	39.1393	3.4302	68.5722	2.344	95.7648	2.8181	57.2336	2.9507	76.5824	4.8935	89.7141	2.1057	67.7297	2.6339	21.4776	16.7543	38.435	3.9455	72.9935	4.0015	42.3444	1.2639
10923	SUB1	SUB1 homolog (S. cerevisiae)	69.2378	10.6726	13.2473	24.8721	17.6525	23.8558	24.2717	45.0413	19.2159	35.9344	41.362	47.0341	3.3592	25.0662	25.1807	34.2377	21.9362	18.7244	16.8234	17.0595	20.042	50.754	7.1027	26.0361	20.9543	9.4163	13.5498	21.835	14.8492	31.2703	9.7501	17.2741	10.781	42.364	19.2433	31.4614	12.4532	19.3698	15.0283	32.7018	25.6986	3.4415	18.4077	26.4984	13.6127	60.1563	10.0238
101060751	LOC101060751	nucleoside diphosphate kinase B-like	17.7189	4.175	3.6818	4.3298	10.0557	4.1538	12.9979	2.3876	24.0287	8.758	29.8359	12.7518	0.5314	3.4228	6.6902	14.8223	5.3552	5.9994	2.8718	3.0701	5.5087	8.7731	1.1946	5.0711	7.3842	3.5702	2.0003	5.1649	2.7273	5.5194	3.0207	5.3088	1.6693	5.6539	6.7008	5.4143	3.647	4.936	4.4775	3.3689	13.5607	1.9246	17.3489	9.1927	7.6591	2.3518	1.1329
9130	FAM50A	family with sequence similarity 50, member A	0.0866	0	0	0	0	0.0105	0	0.0219	2.5265	0.0767	0.0101	0	0	0	0.0105	0.0544	0	0.1059	0.0297	0.0224	0.0072	0.1551	0	0	0.0247	0	0	0.0175	0.0181	0.0802	0	0.0122	0.0213	0.045	0.038	0.0176	0.124	0	0	0.0482	0	0	0.6029	0.0706	0	0.8772	0
7108	TM7SF2	transmembrane 7 superfamily member 2	0.0411	0.0391	0.0247	0.1937	0	0.2005	0.0691	0.1956	0	0.1928	0.1623	1.4802	0	0.8441	0.0127	0.4902	0	0	0	0	0.0331	0.0079	0	0.0139	0	0.0162	0	0.0643	0	0.1852	0.0062	0.3092	0.0611	0.2567	0	0.7524	0	1.409	0.0818	0.2686	0	0	0.0923	0.8401	0.1254	1.2896	0
4173	MCM4	minichromosome maintenance complex component 4	0.352	0	0.2319	0	1.319	0	1.336	0	1.8477	0	0.1514	0	0.0211	0	0.1238	0	0.3066	0.0411	1.0746	0	0.637	0	0.0147	0	0.7117	0	0.7066	0	0.0088	0	0.9943	0	0.9564	0	2.2417	0	0.0749	0.0103	0.9909	0	0.0552	0	0.9957	0	0.2006	0	0.0056
6232	RPS27	ribosomal protein S27	5.0687	0.7759	2.1679	0.6182	1.5704	0.8025	1.9108	3.0069	3.9897	0.6492	2.2433	0.8498	0.484	1.4257	3.8206	5.4941	6.6063	0.9941	2.2443	1.2553	1.7502	2.6627	0.297	2.0656	1.3089	0.2916	0.5681	0.4102	0.7411	4.673	0.362	0.2032	0.6171	1.0018	0.6437	0.7998	0.8907	2.3328	1.1846	0.7918	0.2357	0.3986	0.947	1.236	1.0326	1.4343	2.257
1456	CSNK1G3	casein kinase 1, gamma 3	0.0556	0	0.0215	0	0.5487	0.0164	0.0201	0.0292	0.0132	0.0266	0.0173	0.0365	0.0013	0.0377	0.0325	0.0282	0	0.0524	0	0	0.0117	0	0.0044	0.0494	0.0093	0.0033	0.008	0.0084	0.026	0.4385	0.0089	0.4409	0.0056	0.017	0.0175	0.4733	0.0136	0.0246	0.0122	0.0122	0.036	0.0059	0.0145	0.0185	0.0115	0.0519	0.0076
9804	TOMM20	translocase of outer mitochondrial membrane 20 homolog (yeast)	0.8264	0.6182	0.0402	0.1865	0	0.1869	0.1262	1.3104	0.4762	0.6134	0.0471	2.075	0.2439	1.1989	0.0578	0.4549	0.0208	0.0691	0.0335	0.1511	0	2.4534	0	0.1413	0	0.1659	0	0.2068	0.0619	1.2022	0.0411	0.3818	0.278	1.1247	0.0425	0.696	0	0.8534	0.1004	2.4668	1.5089	0	0.0727	1.3051	0.0761	1.4771	0.358
416	ARSF	arylsulfatase F	0.0625	0.0845	0	0.1493	0	1.4722	0	0.6378	0	0.0167	0	0.4372	0.0732	0.3522	0.0887	0.9782	0	0.0283	0.0155	0	0.022	0.6261	0.0172	1.2274	0	0.455	0.0148	0.3987	0.0136	0.3841	0	0.2753	0.0067	1.0916	0	0.8144	0.0582	0.9095	0.0109	0.8852	0	0.1966	0	0.2295	0	0.9101	0
7408	VASP	vasodilator-stimulated phosphoprotein	3.4579	0.2918	1.6268	0.8168	3.1613	1.1935	1.7772	2.4367	3.1637	2.0731	2.4573	0.5346	0.1673	0.8755	1.678	1.8459	0.8743	0.555	0.6734	0.2212	2.4113	0.9869	0.7754	0.6227	1.5255	0.5411	1.4147	1.1058	0.8366	0.7077	2.2097	0.7635	0.8809	2.5735	1.6862	0.861	2.3066	1.0677	1.6605	0.8211	2.8222	0.3355	1.9251	0.3077	1.0084	1.2749	1.546
79811	SLTM	SAFB-like, transcription modulator	0.7153	0	0.2409	0.4467	0.0156	0.0465	0.0426	0.0021	0.5668	0.4517	0.034	0.0121	0	0.0387	0.1573	0.0332	0.1655	0.2484	0.2906	0.003	0.0319	0.4629	0.0666	0.0963	0.2002	0.12	0.0198	0.0032	0.4477	0.8876	0.0245	0.6063	0.4188	0.0248	0.0339	0.0031	0.0237	0.0015	0.7211	0.0042	0.164	0	0.8238	0.0078	0.0051	0	0.0022
79590	MRPL24	mitochondrial ribosomal protein L24	0.1475	0.9243	0.1533	0.4364	0.7666	1.4323	0.1746	1.0837	0.7874	1.438	1.1059	1.9616	0.0222	1.6981	0.2012	1.1513	0.1828	0.4362	0.1057	0.2429	0.0308	1.2935	0.0483	0.857	0.0139	0.7583	0.2183	0.8144	0.1749	1.3892	0.2982	2.7857	0.1012	1.2582	0.4085	0.6083	0.0682	3.9863	0.3308	0.9804	0.4275	0.5267	0.5726	1.0909	0.1763	0.7349	0.024
24138	IFIT5	interferon-induced protein with tetratricopeptide repeats 5	0.2803	0.0146	0.0165	0.0147	0.092	0.031	0.16	0.0714	0.0538	0.1239	0	0.0476	0.2933	0.064	0.0313	0	0.0231	0	0.1898	0.0088	2.1787	0.9249	0.015	0.0314	0.0561	0.0319	0.1038	0.0286	1.0058	0.058	0.1473	0.0322	0.5903	0.0771	2.2392	0.0595	1.6855	0.061	3.1273	0.0385	0.2469	0	0.0707	0	0.0164	0	0.0939
9119	KRT75	keratin 75	0.2287	0.0508	2.0273	0.7169	1.0805	0.3488	1.1152	0.6094	0.848	0.9314	0.7054	0.2272	0.3357	0.2307	0.0415	0.3287	0.2986	0.0669	0.4102	0.1864	1.0816	0.9192	0.6296	1.3169	1.0724	0.5421	0.7076	0.9708	0.531	1.1661	0.3456	0.5615	0.6577	1.7137	0.5343	0.8202	0.874	0.5654	0.248	0.7067	1.0693	0.0441	0.5071	0.2209	0.4512	0.3955	0.5783
57104	PNPLA2	patatin-like phospholipase domain containing 2	0.0098	0	0.1423	0	0.1048	0	0.0419	0	0.3223	0	0.1218	0	0	0	0.007	0	0	0	0	0	0.0138	0	0.0199	0	0.0099	0	0.0056	0	0.1757	0	0.0302	0	0.025	0	0.0116	0	0.1642	0	0.1869	0	0.0298	0	0.0114	0	0.0095	0	0
55325	UFSP2	UFM1-specific peptidase 2	0.1367	0.2708	0.4707	0.4897	1.8286	1.3672	1.2654	0.6566	0.152	0.5402	0.597	0.8534	0.1244	0.6368	0.2693	1.131	0.439	0.233	0.1208	0.0184	0.6028	0.7284	0.0519	0.6396	0.3364	0.2077	1.454	1.4209	0.6425	1.3076	0.7666	2.58	0.4709	0.6019	0.7119	0.8326	1.1579	0.7373	1.2368	1.3319	0.3745	0.5157	0.2729	0.4421	1.1465	0.492	0.395
5970	RELA	v-rel avian reticuloendotheliosis viral oncogene homolog A	2.9942	0.0701	2.2858	0.5919	0.6526	0.2739	2.3229	3.342	0.3265	2.2084	2.1444	1.0353	0.276	0.9194	0.6939	1.0406	1.126	0.11	1.0655	0.1547	2.4522	0.7713	0.0469	1.7299	1.08	0.3643	0.3859	0.0873	0.4736	0.3823	0.7825	0.0893	0.3194	0.3944	0.5386	0.2188	0.7486	0.4414	0.6455	0.2337	0.358	0.5444	5.3692	0.7827	3.2639	3.7137	2.3435
1207	CLNS1A	chloride channel, nucleotide-sensitive, 1A	0.5137	0.6952	0.9957	0.8458	0.43	0.3317	0.8369	0.0278	3.4277	1.1483	0.267	1.0368	0.171	0.9809	0.67	2.123	0.821	0.3259	0.6348	0.1493	0.9496	1.5209	0.3077	1.5398	1.89	0.6723	0.7232	0.3738	0.2667	0.3998	0.667	0.1907	0.3147	0.4028	0.4619	0.4247	0.4995	0.239	0.7261	0.2466	0.8384	1.4434	1.7451	0.0269	1.0344	0.4064	0.9974
51808	PHAX	phosphorylated adaptor for RNA export	0.0797	0	0	0	0	0	0	0	0	0	0	0	0	0	0	0	0	0	0	0	0	0	0	0	0	0	0	0	0	0	0	0	0	0	0	0	0	0	0	0	0	0	0	0	0	0	0
7130	TNFAIP6	tumor necrosis factor, alpha-induced protein 6	0.8177	0	0	0	0.3132	0	0	0	0	0	0	0	0	0	0.2033	0	0.0148	0	0	0	0.0876	0	0.017	0	1.0463	0	0	0	0	0	0	0	0	0	0	0	0.3534	0	0.506	0	0.1591	0	0.0561	0	0	0	0
9343	EFTUD2	elongation factor Tu GTP binding domain containing 2	8.3467	0.6492	1.7468	0.5564	2.3942	0.6727	2.7825	1.3019	2.6135	1.1971	2.6481	1.1743	0.2305	0.83	1.9174	1.3692	1.9572	0.529	1.1358	0.2824	1.7366	2.3113	0.6127	0.7266	1.2204	0.672	1.0972	0.7425	1.1641	0.965	1.4003	0.7126	0.7984	1.5588	1.6303	1.0957	1.6777	1.0034	1.5963	0.8385	2.3892	1.1423	2.4092	0.877	1.7375	1.8233	0.8883
340529	PABPC1L2A	poly(A) binding protein, cytoplasmic 1-like 2A	0.2078	0.0601	0.0629	0.147	0.2391	0.2216	0.2575	0.1225	0.1457	0	0	0	0.0343	0	0	0	0.0156	0	0.0064	0.0805	0.2225	1.0987	0.1064	0	0.251	0.6334	0.2334	0.2545	0.2248	0.3854	0.306	0.2363	0.1287	0.3454	0.2036	0.3928	0.3444	0.2136	0.3352	0.2081	1.0386	0.0892	0.724	0.1248	0.0287	0.1182	0.0159
339122	RAB43	RAB43, member RAS oncogene family	0.0927	0.0661	0.2868	0.0176	0.4069	1.4285	0.634	0.0734	0.2142	0.2511	0.5848	0.6636	0	0	0.0553	0.1265	0.1139	0	0.1467	0.1782	3.1185	0.0987	1.1776	0.4091	0.0396	0.2703	0.0247	0.0192	0.104	0.2594	0.1506	0.0227	0.1563	0.3118	0.0161	0.0194	0.2411	0.0242	0.0248	0.2664	0	0	0.0624	0.1736	0.0756	0.3271	0.1046
143471	PSMA8	proteasome (prosome, macropain) subunit, alpha type, 8	4.7353	0.8415	1.9006	2.7099	1.088	2.9442	4.4816	1.1169	4.2224	3.218	5.2498	3.4117	0.4827	3.082	4.7581	2.437	1.7529	0.9634	2.0172	0.4889	2.9908	2.2225	0.5893	1.6129	1.7056	1.0124	0.4933	1.1537	0.8913	1.8298	1.2459	1.269	0.6595	1.3388	1.3926	1.3611	0.9401	1.2737	1.1291	0.998	5.3698	3.5343	3.3444	2.6874	3.1704	1.2184	2.4458
10155	TRIM28	tripartite motif containing 28	3.1042	1.2222	2.3379	1.7583	3.0332	2.3392	7.3472	3.8042	3.6611	3.6236	1.1429	2.3312	0.4923	2.5761	3.3044	2.7183	1.6923	1.4796	1.7917	1.0045	2.6818	2.1971	0.9167	1.678	2.3388	1.3326	2.6764	2.0594	1.7914	3.175	3.7139	2.6268	1.3487	3.6136	3.0993	2.7703	2.6424	2.6274	2.6868	2.3385	3.5854	1.02	10.9896	1.75	3.6194	3.9193	2.0524
51389	RWDD1	RWD domain containing 1	1.2484	0.4063	0.5882	1.7599	0.7183	0.4152	0.1709	0.5723	0.2324	0.3831	0.295	1.3291	0.0518	0.2751	0.1398	0.2577	0.2755	0.0754	0.151	0.1967	0.7992	1.0714	0.0934	0.5072	0.4021	0.4188	0	0.204	0.1047	0.362	0.1405	0.1813	0.0222	0.1383	0.1335	0.3014	0	0.1087	0.1376	0.2053	1.0034	0.0493	0.0669	0.1602	0	0.0369	0.6648
91942	NDUFAF2	NADH dehydrogenase (ubiquinone) complex I, assembly factor 2	0.5171	2.0301	0	3.5591	5.1051	1.1852	5.8931	3.029	0.516	6.421	0.3078	11.1544	0	4.6233	0.0756	2.9981	0.0652	1.2794	0.1389	0.1842	0.0584	1.7159	0.0254	2.995	0.1048	2.6473	0	2.4139	0.5728	1.6973	0.9953	2.5454	0.0732	2.175	0.2233	1.9053	0.8169	1.4339	0.8053	1.4557	0.2856	0.4992	0.3993	1.8225	0.4929	0.481	0
8106	PABPN1	poly(A) binding protein, nuclear 1	2.5597	0.6102	1.0979	0.5937	0.6254	0.6304	1.099	0.6601	1.4148	1.3051	0.736	0.7394	0.3322	0.854	2.3744	1.2771	1.1484	0.7774	1.4205	0.4979	1.2489	0.7406	0.4484	0.6738	0.9183	0.4528	0.6111	0.3273	0.9835	0.3888	0.6882	0.6596	0.3794	0.9618	0.5839	0.2715	0.8238	0.503	0.6174	0.6311	1.5949	0.2037	1.1663	0.5681	0.7826	2.0401	0.6556
23410	SIRT3	sirtuin 3	1.7024	0.6435	0.0667	0.4572	0.9102	0.5424	2.4707	0.3961	0.4239	1.3559	0.0536	0.4707	0	0.8504	0.0125	1.3417	0.3015	3.4239	0	0.0837	1.2708	0.7893	0.0188	0.6171	1.1552	0.1693	0.6011	1.4707	0.4752	0.7267	0.5444	0.567	0.0223	0.3164	0.742	0.5279	0.2587	0.9833	0.2061	0.3486	4.3951	0.4845	1.2457	0.0435	0.0542	0.4028	0.008
10135	NAMPT	nicotinamide phosphoribosyltransferase	4.1012	0.4934	5.375	1.3362	11.8375	1.2551	5.1003	1.7406	7.2811	2.5997	2.5138	1.7125	0.1979	1.8438	1.3786	1.6638	1.3641	1.0372	0.9573	0.6549	11.0893	1.485	2.3146	1.1239	1.2169	1.0837	2.6941	0.563	2.4815	0.5922	2.6106	7.7254	4.2683	3.987	5.2503	0.8567	4.0603	0.7206	3.275	0.9852	2.5964	0.2212	3.3909	1.2234	1.6218	1.7219	0.9596
56259	CTNNBL1	catenin, beta like 1	0.5667	0.1136	0.8899	0.1985	1.3352	0.2308	0.3113	0.3369	0.2572	0.2033	0.4859	0.3574	0.0344	0.1306	0.0233	0.0585	0.0349	0.0129	0.075	0.0179	0.6782	0.2571	0.361	0.2369	0.5908	0.1737	0.2307	0.1182	0.2075	0.2762	0.3212	0.1004	0.1747	0.2418	0.5713	0.1811	0.3744	0.2313	0.4609	0.146	0.9337	0.1051	1.2093	0.0644	0.3337	0.4435	0.1822
4928	NUP98	nucleoporin 98kDa	0.5439	3.0698	2.5154	0.9672	0.4378	0.071	2.4965	1.5062	1.6394	0.5685	1.478	1.095	0.9356	0.0946	2.4228	0.2259	3.5776	0.1778	2.2561	0.0303	0.803	2.5666	0.0622	0.9123	0.1516	1.284	0.3178	0.0975	0.208	0.6939	0.4756	0.1034	0.193	0.2982	0.3595	0.151	0.1487	0.2001	0.3571	0.0991	0.2948	0.0233	2.9106	1.7065	1.1984	2.4741	0.3763
6421	SFPQ	splicing factor proline/glutamine-rich	6.1199	13.4926	11.0751	3.6013	9.5357	2.998	16.2108	7.6585	3.5866	4.2204	7.0392	8.6851	0.6928	2.8177	6.016	5.804	3.9244	2.7163	4.882	1.9122	13.205	3.8194	3.2519	5.979	10.1425	3.5113	6.098	6.5316	1.9373	5.5755	4.2298	7.613	1.7987	3.0813	14.2526	2.151	4.569	2.5001	3.6209	2.4413	4.5749	3.3062	12.4074	6.4427	21.0103	5.5761	2.8619
3303	HSPA1A	heat shock 70kDa protein 1A	31.3755	11.5502	12.8118	28.6331	12.7368	25.7823	24.4133	24.3635	21.1911	31.7122	27.2415	39.308	2.098	23.5711	37.145	50.2314	22.5549	17.6871	29.9329	10.325	25.8252	36.7579	8.18	28.9941	26.0086	20.7845	19.8522	21.7723	25.6724	37.4087	45.3993	18.7897	17.793	35.8992	13.9016	25.1446	17.1589	22.7172	27.7636	21.3709	34.2786	8.6142	77.6316	16.3429	20.1058	33.921	6.6479
79902	NUP85	nucleoporin 85kDa	0.2912	0.0679	0.1492	0.0947	0.3676	0.3676	0.2985	0.3148	0.1648	0.1878	0.3914	0.1617	0.0813	0.3724	0.1514	0.2083	0.3054	0.0463	0.2107	0.0726	0.119	0.2478	0.0426	0.1144	0.1577	0.1089	0.3936	0.1633	0.1104	0.0748	0.1388	0.0541	0.1855	0.3023	0.2918	0.1605	0.5949	0.2787	0.3375	0.1627	0.404	0.0768	0.3259	0.0807	0.1684	0.2149	0.1199
63894	VIPAS39	VPS33B interacting protein, apical-basolateral polarity regulator, spe-39 homolog	0.0675	0.0429	0.0321	0.0281	0.0456	0.0685	0.1303	0.0423	0.0601	0.1031	0.0334	0.0869	0.0181	0.0961	0.0292	0.024	0.0412	0.0139	0.0229	0	0.0664	0.0837	0	0.0469	0.0288	0.0828	0.0288	0.0557	0.0873	0.1417	0.1161	0.0809	0.0528	0.1054	0.1471	0.0688	0.1176	0.0695	0.3344	0.063	0.0795	0.022	0.02	0.05	0.0936	0.0732	0.0642
64342	HS1BP3	HCLS1 binding protein 3	1.9972	0.9971	1.5806	2.6281	5.1307	3.1654	3.6322	0.9992	3.895	4.9858	2.5622	3.2421	0.1831	2.4562	1.7825	6.0657	2.2935	0.1425	2.181	0.5637	1.6766	2.164	0.3139	0.5682	0.9924	1.8991	0.7008	0.7594	1.6279	1.4929	1.2433	1.0526	0.7627	3.8122	1.7437	3.8663	1.1408	1.1123	1.5313	1.5369	7.5677	1.7345	3.5944	4.5215	0.555	0.3704	0.4143
29943	PADI1	peptidyl arginine deiminase, type I	0.0688	0	0.0904	0	0	0	0	0	0	0	0	0	0.0534	0	0	0	0	0	0	0	0	0	0	0	0	0	0	0	0	0	0	0	0	0	0	0	0	0	0	0	0	0	0	0	0	0	0
51194	IPO11	importin 11	0.1488	0	0	0	0.3105	0	0.1246	0.0086	0.0728	0	0	0.0217	0	0	0.0154	0	0.0104	0.0067	0.0098	0	0.0184	0.0135	0	0.0128	0.0136	0	0.0012	0	0.0306	0	0.01	0.0043	0	0.0034	0.0331	0.0216	0.0227	0	0.0323	0.0372	0	0.0076	0.049	0	0.0526	0	0.003
55604	LRRC16A	leucine rich repeat containing 16A	0.0889	0.059	0.0267	0.7223	0.0569	0.11	0.0489	0.3015	0.1792	0.1644	0.1047	0.1876	0.0204	0.1681	0.0842	0.5629	0.1254	0.4815	0.0416	1.5247	0.1195	2.3728	0.0411	1.5158	0.0858	1.2216	0.0996	0.1004	0.1289	0.2667	0.2238	0.1185	0.0888	0.3359	0.3353	0.0703	0.1417	0.1005	0.1364	0.075	0.2611	0.0458	0.3695	0.0765	0.346	0.3687	0.0426
23644	EDC4	enhancer of mRNA decapping 4	0.4507	0.055	0.4859	0.0651	0.3961	0.2117	0.5197	0.2152	0.298	0.3336	0.4374	0.1028	0.0643	0.3363	0.2072	0.2231	0.1502	0.1173	0.203	0.0222	0.4295	0.7858	0.0449	0.1519	0.2161	0.1357	0.1138	0.12	0.2137	0.1544	0.2874	0.3025	0.115	0.1987	0.3335	0.1092	0.2178	0.2458	0.2467	0.1862	0.112	0.144	0.2682	0.0926	0.3925	0.2721	0.2892
201626	PDE12	phosphodiesterase 12	0.1317	0.3444	0.0892	0.3905	1.4583	0.3327	0.2528	0.3744	1.2215	1.1181	0.4832	0.8872	0.0373	0.6258	0.136	0.2221	0	0.3542	0.0717	0.1981	0.1866	0.5006	0.0357	0.4849	0.1109	0.184	0.1613	0.327	0.0913	0.6659	0.1134	0.6579	0.043	0.8983	0.1421	0.4458	0.1161	0.6862	0.1672	0.4818	0.6101	0.5918	0.263	0.3342	0.1472	0.6424	0.1968
29777	ABT1	activator of basal transcription 1	0	0	0.0209	0	0	0	0	0	0.0519	0	0	0	0	0	0.0095	0	0.0131	0	0	0	0	0	0	0	0	0	0	0	0	0	0	0	0	0	0	0	0	0	0	0	0.6285	0	0.0267	0	0	0	0
359948	IRF2BP2	interferon regulatory factor 2 binding protein 2	0.2663	0.0081	0.4527	0.3117	0.0889	0.0805	1.9212	0.4973	0.3299	0.0673	0	0.4753	0	0.1796	1.5729	0.108	0.0477	0.1165	1.3881	0.0107	0.6217	0.9555	0.0752	0.4611	0.4503	0.2465	0.1351	0.0141	0.1552	0.0619	0.2847	0.045	0.0463	0.0633	0.0882	0.0294	0.1137	0.0526	0.1713	0.0579	1.2984	0.0309	1.8562	0.7732	0.2927	0.2426	0.1425
26059	ERC2	ELKS/RAB6-interacting/CAST family member 2	0.2079	0.21	0.1179	0.0096	0.0538	0.017	0.0534	0.0235	0.0239	0.0195	0.1412	0.0188	0.0048	0	0.2591	0.1056	0.0304	0.0097	0.0754	0.0126	0.5852	0	0.0094	0	0.039	0	0	0	0.0071	0	0.0072	0.0631	0.0084	0.0119	0.0214	0	0.0266	0.0135	0.0191	0.0046	0.0194	0	0.0324	0.0452	0	0	0.0019
375743	PTAR1	protein prenyltransferase alpha subunit repeat containing 1	0	0	0	0	0.1766	0.0236	0.1073	0.0195	0.0256	0.0959	0	0	0	0.0926	0	0	0.0036	0	0.0304	0	0	0.013	0.0182	0.041	0.0101	0.0051	0.0258	0	0.0717	0.0608	0.0558	0.1312	0.0147	0.1998	0.0984	0.0306	0.2612	0	0.1621	0	0.015	0	0.0161	0	0.0883	0	0.0094
9482	STX8	syntaxin 8	8.7215	0.2458	0.6528	0.4052	0.6847	0.7965	0.3893	0.1281	0.4835	0.4408	0.606	0.3655	0.0741	0.3241	0.2146	0.2033	0.0776	0.0513	0.2927	0.2879	0.8834	0.5793	0.1403	0.1473	0.4858	0.1831	0.2663	0.1226	0.3293	0.519	0.3944	0.2265	0.0584	0.3225	0.4643	0.3467	0.1004	0.8341	0.2862	0.257	0.2577	0.0422	0.3036	0.074	0.2179	0.2846	0.279
83854	ANGPTL6	angiopoietin-like 6	0.0103	0	0.0278	0	0.0167	0	0	0	0.0838	0	0	0	0	0	0	0	0.0101	0.0063	0	0.0093	0	0.1092	0	0	0	0	0.0302	0	0	0.0024	0.0275	0.0213	0.0087	0.0112	0.0181	0	0.0461	0	0	0	0	0	0.0476	0	0.0154	0.0195	0.0195
727957	MROH1	maestro heat-like repeat family member 1	0.0025	0.041	0.0272	0.0344	0.0442	0.0323	0.568	0.0501	0.1466	0.0279	0	0.0259	0.0146	0.0487	0.0597	0.0328	0.0224	0.0629	0.0132	0.0113	0.1293	0.0385	0.0073	0.0217	0.022	0.0298	0.0416	0.0307	0.0081	0.1026	0.0084	0.0469	0.0448	0.0587	0.3023	0.0026	0.0061	0.0297	0.0158	0.0043	0.0058	0.0187	0.0013	0.0304	0.1168	0.1075	0.0086
10203	CALCRL	calcitonin receptor-like	1.1332	0	0.4895	0	0.0931	0	0.2246	0.0689	0	0	0.1983	0.0442	0.0416	0.0317	0.6642	0.0387	0.1747	0.031	0.2613	0	0.3573	0.0159	0.2052	0	0.3841	0.0079	0.2436	0	0.1783	0	0.168	0.0285	0.0485	0.0175	0.3601	0.0675	0.2259	0.025	0.1312	0.0475	0	0.3607	0	0	0.3769	0.1326	0.1531
3251	HPRT1	hypoxanthine phosphoribosyltransferase 1	8.0046	3.9296	5.6296	5.8745	5.9867	8.1137	8.5905	5.3589	6.1677	6.1624	5.8999	6.5643	2.6487	4.8942	4.0379	6.0435	3.8722	3.9883	2.0666	2.8481	2.7785	7.4069	1.0793	7.8369	1.324	4.4082	2.1101	3.0726	2.1354	6.6115	3.1261	6.9642	0.9679	3.9475	4.0283	4.0689	7.5471	4.8048	3.1813	3.6056	1.776	3.387	4.073	5.3042	7.5744	7.4415	4.8787
58155	PTBP2	polypyrimidine tract binding protein 2	2.4552	0.012	3.7803	0.9487	0.2228	1.0444	0.0612	0.0378	0	0.1002	0.0862	0.1118	0.0047	0.0321	0.9324	0.0082	0.0137	0	0.089	0.1508	1.8316	1.0716	0.3382	1.5819	0.9995	0.4762	0.1783	0.1681	0.1698	0.2334	0.2219	0.1739	0.107	0.3785	0.1379	0.2763	0.1157	0.1519	0.1617	0.0949	1.5683	0.0387	1.6722	0.0739	0.0338	0.0657	0.0408
9779	TBC1D5	TBC1 domain family, member 5	0.0275	0.118	0.109	0.0488	0.0856	0.1711	3.9116	0.0851	0.4347	0.1212	0.1856	0.218	0.0148	0.1818	0.1251	0.3	0.1377	0.1036	0	0.0413	0.1065	0.1518	1.5353	0.0744	0.0454	0.1078	0.0426	0.0438	0.0365	0.0899	0.0657	0.0548	0.0461	0.1615	0.1236	0.0644	0.0333	0.1717	0.1216	0.0267	0.2173	0.1151	0.0954	0.166	0.1658	0.0776	0.0519
7070	THY1	Thy-1 cell surface antigen	80.6346	12.6997	115.943	63.9577	36.8077	30.5304	142.376	29.1887	34.9921	128.144	25.4985	36.1359	3.669	103.739	144.55	24.8057	90.9141	14.6134	55.7433	5.9848	58.0953	43.5063	16.2287	6.2499	68.0103	14.3956	98.4418	22.4678	55.0147	60.68	71.6576	47.9929	49.3649	36.2493	73.3437	72.2268	136.923	47.1027	105.684	28.7783	12.948	27.0619	44.8655	56.3017	53.0116	44.0877	11.8763
5195	PEX14	peroxisomal biogenesis factor 14	0.1742	0.0086	0.4545	1.1099	0.0798	0.1091	0.009	0.0328	0.0919	0.068	0.0664	0.155	0.0046	0.0726	0.1689	0.0624	0	0	0.0959	0	0.8082	1.0512	0.201	1.5219	0.1945	0.5619	0	0.0348	0.0107	0.0729	0.0125	0.0195	0.0087	0.0165	0.0395	0.0709	0.0332	0.1069	0.0315	0.0703	0.6347	0.1252	0.4538	0.034	0.0477	0.0301	0.0136
9782	MATR3	matrin 3	4.4915	1.1584	3.3846	1.4083	3.1573	2.2145	5.0304	4.0009	3.7157	2.9637	2.4376	1.9828	0.5449	2.8432	3.9148	3.4869	2.8469	1.626	3.7769	0.8391	4.2846	3.363	1.2672	1.9665	2.0759	1.5989	3.2866	1.9713	2.3841	2.6755	3.1439	1.859	1.5774	2.9398	2.9992	2.696	2.5111	2.4041	3.2165	2.3342	3.3188	1.1868	2.8345	1.6513	2.6643	4.4534	1.8041
79879	CCDC134	coiled-coil domain containing 134	0.056	0	0	0.0157	0	0	0.0495	0.0721	0.0448	0.0649	0	0.0764	0	0	0	0	0.0545	0.0748	0	0.0097	0.0645	0	0.0258	0.0431	0.2153	0.0092	0.3733	0	0.1449	0	0.5029	0	0	0.1607	0.0486	0	0	0	0.3913	0.1621	0	0	0.0657	0.0157	0.1922	0.1882	0.0259
10490	VTI1B	vesicle transport through interaction with t-SNAREs 1B	0.5972	0	0.2106	0.9226	0.5306	0.4104	0.1833	0.0723	0	0	0.0366	0	0	0.0219	0.0374	0	0.7155	0	1.3391	0.4363	1.1525	0.9741	0.2024	0.7957	0.0471	0.255	0	0.0288	0.2424	0.2243	0.1188	0	0	0.0529	0	0.0443	0.157	0.116	0	0.0686	0.2265	0	0.0135	0.0108	0.0448	0	0
81631	MAP1LC3B	microtubule-associated protein 1 light chain 3 beta	0.0229	0	0.0209	0	0.2334	0.0595	0.144	0.0978	0.0576	0.1892	0	0	0	0	0.1584	0	0	0	0	0.0056	0.0918	0.0711	0.0203	0	0	0.0421	0.0719	0	0.0505	0.0628	0.1334	0.0593	0.0769	0.1263	0.0147	0.0554	0.2175	0.0984	0.1308	0.0764	0	0	0.0808	0	0.0828	0.1741	0.0818
6434	TRA2B	transformer 2 beta homolog (Drosophila)	4.3599	5.0095	17.3218	9.188	7.687	5.7519	20.3418	8.6391	17.6713	8.5309	18.0698	9.7907	1.6244	8.3603	6.4417	8.232	7.1845	4.1413	5.1804	2.347	11.9917	7.7698	3.5192	3.6791	9.1168	3.8294	11.1361	7.4066	6.7194	10.3167	12.557	7.4178	7.0851	9.623	17.2877	7.4956	8.885	7.0198	9.8977	8.0923	5.2784	0.9179	16.8233	3.5696	5.2824	10.6294	7.463
55095	SAMD4B	sterile alpha motif domain containing 4B	0.009	0.0026	0	0	0.0752	0.0401	0.2896	0.0785	0.0191	0.0153	0.0286	0.1251	0	0	0	0.2419	0.0144	0.0244	0.0141	0	0.1791	0.0089	0.0095	0.0059	0.3028	0.0053	0.0186	0.0063	0	0.0116	0.0344	0	0.0245	0.0365	0.0519	0.0088	0.0936	0.0117	0.2272	0.0077	0	0	0	0	0.0107	0	0.0091
388468	POTEC	POTE ankyrin domain family, member C	0.0031	0.0106	0.1748	0.2236	0.4678	0.2032	0.0631	0.0626	0.1256	0.0326	0.049	0.0531	0.0184	0.1138	0.0054	0.0383	0.0145	0	0.4126	0	0.2308	0.7917	0	0.373	0	0.0011	0	0.2053	0	0.3129	0.2301	0.2232	0.1005	0.2186	0.2033	0.1718	0.2364	0.3311	0.147	0	0.048	0.0125	0.0842	0.0506	0.0233	0.0471	0.0646
1938	EEF2	eukaryotic translation elongation factor 2	31.9048	10.6259	23.1363	14.438	38.3166	15.0862	59.8357	17.899	32.8513	24.2904	58.8652	24.4509	2.083	19.765	13.4823	14.83	12.4796	6.5763	15.1806	5.5378	14.8199	14.2699	3.3161	16.6421	12.799	11.0583	10.1046	12.0545	8.9395	22.8995	17.3351	18.877	5.3604	17.0772	21.4016	13.4936	10.5135	13.1335	15.1891	9.0524	31.8154	7.1644	34.6571	15.4601	18.2249	17.4127	11.0736
23381	SMG5	SMG5 nonsense mediated mRNA decay factor	0.1347	0	0.0027	0	0.0099	0.0217	0.0107	0.0044	0.0292	0.0111	0.0024	0.1657	0.0087	0	0	0	0	0	0	0	0.0063	0.0049	0	0	0	0	0	0	0.002	0.0029	0.0046	0.0055	0.0218	0.1303	0.0177	0.055	0.03	0	0.0257	0.0027	0.7532	0	0	0.0398	0.0308	0.0012	0.0118
684	BST2	bone marrow stromal cell antigen 2	0.2818	0	2.4025	0.3399	2.3553	0.3784	2.1346	0.0827	0.8217	0.6803	1.0453	0	0	0.0206	0.3433	0.1344	0.8704	0.0697	1.761	0.1437	0.7089	0.4942	0.1413	0.152	0.2887	0.1866	0.2868	0.217	0.4493	0.1887	0.616	0.2282	0.101	0.2431	0.3868	0.2902	0.4332	0.3208	0.6728	0.0882	1.9922	0.1938	0.2613	0	1.7957	0.0528	0.0209
23683	PRKD3	protein kinase D3	0.0166	0	0.0286	0.0037	0.1564	0.7639	0.0087	0.0273	0.0111	0	0.0129	0.0293	0.0024	0.051	0.0069	0.0124	0.0102	0.0011	0.0458	0.0045	0.0594	0.1418	0.0122	0.0258	0.0268	0.0146	0.0124	0.0154	0.0353	0.0038	0.076	0.0657	0.0862	0.0193	0.021	0.0907	0.0157	0.0056	0.0147	0.0398	0.0038	0.0043	0.0967	0.01	0.0083	0.0107	0.0221
400954	EML6	echinoderm microtubule associated protein like 6	0.0146	0	0.0161	0	0.0114	0.0161	0.0128	0	0	0.0155	0	0	0	0	0.0229	0.0126	0.0023	0.0057	0	0	0.0128	0	0.0031	0.0105	0.0171	0	0.0075	0.0139	0.0067	0.023	0.0129	0.0175	0.0024	0.014	0.0172	0.0113	0.0111	0.015	0.0129	0.0073	0	0.0044	0.0151	0	0.014	0.0102	0.0051
64795	RMND5A	required for meiotic nuclear division 5 homolog A (S. cerevisiae)	0	0.2381	0.009	0	1.2532	0.0218	0.0371	0.0112	0.0171	0.0328	0.4137	0.2854	0.0087	0.0182	0	0	0	0	0.094	0.1845	0.0268	0.0155	0.1184	0	0.0101	0.0114	0.0118	0.0059	0.0122	1.19	0.045	0	0.0269	0.0194	0.1292	0.0197	0.0164	0.0161	0.016	0.0157	0.0078	0.0136	0.0108	0.0123	0.4798	0.0119	0.3905
55914	ERBB2IP	erbb2 interacting protein	0.6439	0.0759	0.0998	0.046	0.296	0.093	0.174	0.0924	0.1704	0.1556	0.0819	0.129	0.008	0.0704	0.4345	0.3447	0.0607	0.1415	0.137	0.1493	0.426	0.2276	0.0307	0.1987	0.0324	0.1266	0.0936	0.0688	0.0869	0.1401	0.0999	0.0583	0.0451	0.1288	0.1068	0.0706	0.0712	0.0985	0.1051	0.1672	0.0141	0.0105	0.0823	0.0704	0.0632	0.0822	0.0213
55754	TMEM30A	transmembrane protein 30A	0.1754	0.0485	0.3419	0.1892	0.0338	0.2371	0.1328	0.0467	0.6129	0.1173	0.2535	0.1022	0.0645	0.0477	0.1313	0.0696	0.1831	0	0.0207	0	0.2607	0.6344	0.1634	0.1005	0.0903	0.2764	0.1409	0.4918	0.1056	0.5079	0.1136	0.1931	0.0333	0.1418	0.3258	0.216	0.176	0.2361	0.1279	0.0434	0.0578	0.0494	0.0921	0.0858	0.2704	0.0319	0.0715
56926	NCLN	nicalin	1.3151	3.2125	1.4007	2.1795	2.3451	5.3105	1.4683	0.5877	1.419	2.2788	1.7284	4.0551	0.121	1.3974	1.666	1.4154	1.1699	0.2914	0.616	0.228	1.3545	4.0854	0.3933	3.0421	0.7137	1.6037	0.8331	1.4877	0.6992	4.0223	1.2829	3.4829	0.4171	1.1519	1.2707	2.3431	1.0443	1.7085	1.1759	1.3876	1.192	0.1281	0.7932	0.5903	1.0289	2.6143	0.7217
11140	CDC37	cell division cycle 37	5.0476	1.8126	4.5315	3.031	4.2289	2.807	4.3557	4.6564	4.9174	4.1458	2.3543	3.4793	1.0481	2.6027	5.2267	2.2793	3.9489	0.9955	4.265	1.5487	4.9952	3.0071	1.2217	2.2269	2.9721	2.2123	4.0886	2.2261	1.8722	3.2215	3.9131	2.7798	1.8748	3.6808	5.293	3.3435	3.9081	1.9855	3.7384	1.9604	5.5205	2.5801	5.4516	2.6626	6.7643	3.1097	3.8623
27161	AGO2	argonaute RISC catalytic component 2	0.2185	0.2193	0.3964	0.0549	0.3019	0.0766	1.3472	0.8092	0.3258	0.3326	1.9639	0.1186	0.1715	0.253	0.8427	0.2244	0.1708	0.4426	0.3637	0.1005	0.5076	0.5507	0.1567	0.311	0.1808	0.376	0.2001	0.0755	0.1266	0.0462	0.4612	0.3148	0.2414	0.306	0.2251	0.2289	0.5144	0.0431	1.375	0.1918	0.1241	0.0348	0.5034	0.0872	0.4673	0.4602	0.6083
1192	CLIC1	chloride intracellular channel 1	72.7677	16.3598	28.23	20.2152	90.4478	35.579	33.1475	17.555	81.1829	48.9434	47.1796	23.0231	7.1766	33.358	15.6042	19.5134	26.288	3.5666	16.0778	3.4509	40.4854	30.1581	6.8437	19.3928	27.7836	16.3856	42.7323	30.4883	33.8059	49.3515	61.2423	30.1892	24.554	42.6579	63.0047	29.0767	47.6195	32.4299	44.9861	15.3121	27.8058	16.8294	40.0294	16.7515	67.0676	19.0537	27.2516
11315	PARK7	parkinson protein 7	9.6514	17.2894	11.7326	50.6089	9.6312	64.5401	36.9178	52.0113	39.3733	44.6968	68.7349	47.2565	5.5088	47.6552	25.7777	26.3401	10.9098	17.2173	7.3137	11.7065	38.7673	33.1269	9.5891	36.503	17.1976	21.2835	13.2882	45.0541	19.9522	49.081	28.0086	45.7165	8.2121	24.2498	8.7483	10.3633	17.3858	40.2938	23.7748	32.5139	14.8868	6.6636	31.153	45.2669	7.223	35.2164	12.475
54946	SLC41A3	solute carrier family 41, member 3	0.0311	0.0257	0	0	0.034	0	0	0.0728	0	0.0493	0	0.0492	0	0	0	0	0	0	0.0153	0.0096	0.004	0.0397	0	0	0	0	0	0.036	0	0	0	0.0363	0	0.0583	0.0404	0.0321	0.0399	0	0.0211	0.0409	0	0	0	0	0	0.0559	0
55132	LARP1B	La ribonucleoprotein domain family, member 1B	0.0512	0	0.0059	0.0885	0.0079	0.0125	0.0422	0.0043	0.045	0.0524	0.1196	0	0.0341	0	0.1978	0.0068	0.0149	0	0.0158	0.0686	0.0084	0	0.0499	0	0.1593	0	0.0119	0	0.0431	0.0175	0.0338	0	0.0396	0.0554	0.0101	0.006	0.0273	0.0181	0.0252	0.0103	0	0	0.0188	0	0.026	0	0
23558	WBP2	WW domain binding protein 2	0.752	0.074	2.5904	1.7792	2.277	0.9968	0	0.0218	1.6647	0.013	4.2309	0.0898	0	0.0242	0.1648	0.1988	0	0.3615	3.5528	1.0102	2.242	3.1885	0.044	0.513	0.1029	1.6779	2.5081	1.844	0.0204	2.5356	0.9163	1.8164	3.5105	1.1703	0.5757	1.1187	1.6296	1.8739	0.9897	1.0343	0	0	0	0.0113	1.5391	0	6.805
6500	SKP1	S-phase kinase-associated protein 1	4.7341	1.0698	0.9801	3.3472	2.0862	3.6288	2.8319	2.3176	6.885	4.6334	8.1793	4.7224	0.883	2.3173	1.5947	2.2749	0.93	0.5426	0.8899	0.5289	2.0374	3.5021	0.5624	2.787	1.3286	1.1406	1.6495	1.6446	2.2863	3.1851	1.7465	1.975	1.6856	2.631	1.5375	2.343	1.8641	2.0992	2.6074	3.0748	5.2696	1.2552	4.0457	2.0637	1.9213	4.325	0.9296
10274	STAG1	stromal antigen 1	0.316	0.0054	0.0451	0.0132	0.0482	0.0602	0.085	0.038	0.0823	0.074	0.0241	0.0166	0.0114	0.0076	0.045	0.0349	0.0974	0.0151	2.7459	0.0229	0.0866	1.9059	0.1505	0.1635	0.0966	0.6731	0.0321	0.0157	0.0304	0.011	0.055	0.0121	0.0125	0.1538	0.0668	0.1168	0.1389	0.18	0.2217	0.0842	4.1126	0.0172	0.0552	0.0117	0.0246	0.1179	0.065
84135	UTP15	UTP15, U3 small nucleolar ribonucleoprotein, homolog (S. cerevisiae)	0.0282	0.0149	0.0403	0	0.1049	0.0289	0.1806	0.0239	0.1485	0.1228	0.0551	0.0694	0.007	0.0348	0.0102	0	0.0157	0	0	0	0.0503	0.0496	0.0288	0.0244	0.0267	0.0111	0.0312	0.02	0.0295	0.022	0.0644	0.0212	0.0266	0.0432	0.14	0.0393	0.0631	0.0452	0.0431	0.0363	0.0719	0.0157	0.0307	0.0149	0.0554	0.0733	0.0205
92840	REEP6	receptor accessory protein 6	0.1192	1.5969	0.0633	1.6604	0.1538	3.2338	0	0.3974	0	1.8365	0	2.1082	0.0952	1.3087	0	1.5985	0.0489	0.0333	0	0.3276	0.0768	7.436	0.0086	3.2852	0.0947	2.3494	0.0301	1.8977	0	5.3773	0	3.5726	0.0169	1.3059	0	2.6677	0.0393	3.3404	0.0475	1.3127	0.0944	1.4676	0	1.7408	0.0479	0.4473	0.0253
274	BIN1	bridging integrator 1	1.0687	1.5198	0.3493	2.8819	4.0584	4.1671	1.9677	0.9697	1.5844	4.543	0.1355	5.4829	0.0391	4.9082	0.5977	3.521	0.6235	0.2033	0.5054	0.1453	0.5299	4.6073	0.1839	3.36	0.768	1.3058	0.2309	1.8601	0.5729	5.8397	0.69	3.8619	0.6089	2.9259	0.7897	2.5211	0.2471	2.2009	0.6145	0.8968	2.212	3.1688	0.9301	2.2326	3.4439	2.1363	0.6448
9111	NMI	N-myc (and STAT) interactor	1.2346	0	0.5774	0.1204	1.1411	0.0496	0.9136	0.0067	0.8253	0.0689	1.103	0.0859	0.0554	0.022	0.1503	0.1462	0.1583	0.0241	0.101	0.0079	0.2602	0	0.0659	0	0.1231	0	0.2238	0.0405	0.1714	0	0.1295	0.0673	0.0773	0.1497	0.2789	0.2258	0.2836	0.16	0.2216	0.028	0.6408	0.0901	0.3221	0	0.2483	0.0103	0.3256
653361	NCF1	neutrophil cytosolic factor 1	0.0414	0	0	0	0.0818	0	0.0583	0	0.0335	0	0	0.015	0	0.0641	0.0097	0	0	0.0071	0	0	0.2275	0.0097	0.0525	0	0.1147	0.0022	0.0123	0	0.0124	0	0.4557	0	0.0207	0.0054	0.0268	0	0	0	0.027	0	0.0733	0	0	0	0.0454	0	0.0195
6613	SUMO2	small ubiquitin-like modifier 2	4.2681	0	0.8253	0.4794	0.8481	0.6376	0.0602	0.266	0.077	0.0637	0.0653	0.105	0	0	0	0	0	0	3.1348	0.5561	2.0177	0.9307	1.848	2.1249	3.2637	1.5808	1.4094	0.3384	1.0484	1.4873	1.9001	0.4312	0.7894	0.9348	1.2273	0	0.5375	0.4185	1.0688	0.8874	0.1072	0	0.0382	0.0284	0.0663	0	0
79840	NHEJ1	nonhomologous end-joining factor 1	0.0717	0.01	0.0438	0	0.0876	0.0475	0.4514	0.2677	0.0196	0.1316	0.0395	0.2998	0.0233	0.4356	0.0823	0.0249	0.0582	0.0179	0	0.0114	0.0585	0.753	0	0.0168	0.1339	0.3213	0.0252	0.0076	0.0219	0	0.0435	0.0416	0	0.0633	0.0997	0.0204	0.0626	0.0067	0	0.0066	0.0869	0.024	0.1202	0	0.1931	0.0358	0.0085
5445	PON2	paraoxonase 2	6.4127	0.3399	2.7263	3.0163	7.5275	1.1406	5.7362	0.7073	4.9992	0.8294	12.3759	1.2571	0.1355	0.8272	0.356	0.2253	1.4266	0.5349	0.7448	0.2539	2.1536	2.298	0.3984	1.4703	1.1022	0.4195	1.2287	1.0795	0.8931	0.7993	0.9041	1.5885	0.651	2.5948	2.1599	1.5502	1.7289	1.8077	2.35	1.7372	9.638	0.272	0.6934	0.127	0.5375	0.6037	0.5255
10658	CELF1	CUGBP, Elav-like family member 1	0.196	0.2014	0.483	0.4099	0.3642	0.3431	0.3383	0.2588	0.4984	0.5426	0.2162	0.3932	0.0165	0.2254	0.2807	0.2331	0.3176	0.7556	0.3602	0.206	0.3342	0.8356	0.168	0.3022	0.3434	0.4983	0.1777	0.1627	0.3599	0.4544	0.3185	0.2064	0.2739	0.4731	0.6202	0.3004	0.3908	0.2958	0.3341	0.2213	0.3434	0.0953	0.3663	0.2465	0.2042	1.4119	0.365
8394	PIP5K1A	phosphatidylinositol-4-phosphate 5-kinase, type I, alpha	0.0203	0.0539	0	0.1244	0.0208	0.0713	0.0027	0.0243	0.0116	0	0.0058	0.0071	0	0.0231	0	0.0146	0.007	0.0064	0.0045	0.0058	0	0.0216	0	0	0.004	0	0	0.0404	0.0046	0.0656	0.0026	0	0.011	0.1043	0.0129	0.0936	0.0114	0.0661	0.0222	0.1105	0	0	0	0.0094	0.0024	0.0206	0.0062
6810	STX4	syntaxin 4	0.4073	0.2275	1.5748	0.4443	1.4246	1.425	0.4673	0.3177	0.8153	0.3413	1.1626	0.4325	0.0043	0.7734	0.2643	0.1217	0.1488	0.0305	1.5936	0.2973	1.9925	0.2572	0.88	0.9511	2.551	0.6137	3.196	2.2566	1.5656	1.1276	0.5511	0.6675	0.98	1.1673	2.9874	1.369	1.4194	1.643	1.4906	0.6182	0.1653	0.2627	0.2424	0.1856	0.0455	0.4798	0.0756
56061	UBFD1	ubiquitin family domain containing 1	0.7128	0.3449	0.1841	0.0159	1.0849	0	1.1195	0.2339	0.4198	0.4652	0.4587	0	0.0817	0.0164	0.3984	0.1668	0.0771	0.076	0.2285	0.1567	0.0669	0.3985	0.0909	0.136	0.2836	0.2423	0.0882	0.1522	0.2584	0	0.4805	0.2969	0.2279	0.1194	0.5822	0.3477	0.3957	0	0.6532	0.3645	0.4202	0.0173	1.1116	0	0.2713	0.2783	0.1831
151742	PPM1L	protein phosphatase, Mg2+/Mn2+ dependent, 1L	0.0084	0	0.0126	0.0125	0	0.0401	0.119	0.0822	0.0348	0	0	0.034	0	0.0322	0.0843	0.0789	0	0.0254	0.081	0	0	0	0	0.0068	0	0	0	0.0289	0.0617	0.0257	0.1372	0.0235	0	0	0.0413	0.0244	0.0331	0	0.0497	0.0274	0.1881	0.0777	0.0241	0	0.0729	0.0686	0.0154
27348	TOR1B	torsin family 1, member B (torsin B)	0.1053	0.0145	0.0233	0.017	0.0302	0	0.0296	0.0233	0.2861	0.0157	0.0423	0.0632	0.0056	0.0146	0	0.0265	0	0.0064	0.0098	0.0286	0.1008	0.0283	0.0879	0	0.0512	0	0.0155	0	0.0403	0	0.0328	0.009	0.0079	0	0.0374	0.0405	0.0687	0	0.0942	0.0166	0.1023	0	0.0684	0.0205	0	0.0295	0
6897	TARS	threonyl-tRNA synthetase	6.6362	1.0757	1.9753	1.6446	2.8847	1.737	3.7719	1.1663	3.2834	2.4769	5.6956	1.9767	0.2389	1.7989	1.5179	1.7305	1.736	1.011	0.8063	0.3621	1.8935	2.1802	0.3295	1.6545	1.8837	0.8712	1.5048	1.1127	1.7394	1.7032	1.6478	1.4734	1.2198	1.1534	1.6077	1.2698	1.6072	1.4135	1.6316	0.6544	3.1397	1.1654	3.3982	1.6288	2.0417	1.4092	1.5003
84988	PPP1R16A	protein phosphatase 1, regulatory subunit 16A	0.0153	0.042	0.0821	0.0061	0	0	0.2353	0	0.1848	0.3432	0	0	0	0.0167	0	0	0.1252	0.0047	0.0563	0	0	0.1318	0	0.0496	0	0.0397	0	0	0	0.095	0	0	0	0	0	0	0	0	0	0	0.0088	0	0	0.0153	0	0	0.0527
9650	MTFR1	mitochondrial fission regulator 1	0.0676	0	0	0	0	0	0	0	0.026	0	0	0	0	0	0	0	0	0	0	0	0	0.0471	0	0	0	0	0	0	0	0	0	0.0629	0	0	0	0	0	0.0192	0	0	0.1572	0	0	0	0	0	0
23129	PLXND1	plexin D1	0.1167	0.0013	0.109	0	0.0313	0.0054	0.0907	0.0659	0.1978	0.0379	0.0087	0.0466	0.0008	0.0066	0.0696	0.0028	0.0423	0.0324	0.0357	0.0088	0.3147	0.0187	0.075	0.0042	0.08	0.004	0.0673	0.0315	0.0974	0.0031	0.1059	0.0066	0.0214	0.0076	0.2079	0.0037	0.1917	0.0125	0.1766	0.009	0.0102	0.0033	0.0599	0.0018	0.1273	0.0618	0.0291
203	AK1	adenylate kinase 1	3.0388	4.5602	2.2424	7.7105	2.561	9.1732	2.7586	9.2816	5.1267	15.3479	0.5756	8.0064	1.4891	6.8437	4.783	9.5456	2.2108	9.2653	2.8084	10.5414	4.3966	10.6817	2.9814	6.4334	7.6686	4.0413	4.1564	9.5556	4.358	9.7387	7.4063	11.1782	4.7699	14.3362	3.9027	6.1271	8.0378	9.6384	4.1741	9.6238	2.9488	3.3593	3.1667	6.0769	7.4794	26.6812	2.1408
103910	MYL12B	myosin, light chain 12B, regulatory	58.2855	27.4834	51.5313	55.0064	65.8169	31.2791	71.017	96.6349	53.5359	97.6462	153.843	43.7109	12.4192	48.4086	63.4998	43.59	46.119	28.3405	40.9989	21.6786	75.0695	54.1846	22.8486	31.1007	47.7968	30.5024	51.3342	48.6862	29.0205	46.8281	64.1791	51.9839	21.3186	91.3268	38.0556	39.9108	38.7879	33.5153	30.8217	41.913	59.1398	15.7633	43.0106	30.7295	25.9437	46.0112	26.2645
85363	TRIM5	tripartite motif containing 5	38.0712	0.048	18.3488	0.044	0.3595	0.3383	59.171	4.2098	23.6966	22.7389	19.6754	0	0	0.0226	0.4162	0.0257	0.1816	0.0137	0.0121	0	33.4716	0.124	0	0.0694	30.7887	0.0218	0.0274	0.0083	0.0137	0	0.0668	0	0.0768	1.205	1.0406	0.0546	0.0058	0.0165	0.0407	0.0379	27.2966	0.0289	44.1221	0	1.3296	4.8433	10.5344
63971	KIF13A	kinesin family member 13A	0.075	0.0122	0.0034	0.0152	0.016	0.0281	0.012	0.0121	0.0136	0.0153	0.0037	0.5641	0.0022	0.0231	0.0259	0.0339	0.0065	0.0619	0.0053	0.007	0.0093	0.021	0.0009	0.02	0.004	0.0132	0.0008	0.0148	0.0046	0.0261	0.0048	0.0196	0.0035	0.0243	0	0.029	0.0074	0.0218	0.0066	0.0154	0	0.0043	0.0133	0.0267	0.0125	0.0163	0.0122
2597	GAPDH	glyceraldehyde-3-phosphate dehydrogenase	1805.1	647.887	2705.11	1069.42	2395.3	1505.63	3316.72	768.478	6143.94	1224.71	6256.22	1100.61	484.098	1186.34	1808.18	1568.38	2291.91	404.927	1514.44	224.871	2491.95	1397.23	495.064	966.322	2837.55	779.699	1742.57	755.79	2014.63	1409.63	2331.59	1045.1	1030.34	1212.49	1998.78	997.149	2023.29	925.208	2826.46	655.955	1452.07	90.2255	3562.93	801.905	223.773	1061.84	977.787
5586	PKN2	protein kinase N2	0.1545	0.1947	0.1969	0.0843	0.172	0.1793	0.6486	0.2274	0.1943	0.2607	0.2111	0.3062	0.0114	0.2423	0.2508	0.1783	0.2375	0.0558	0.1732	0.0597	0.5186	0.2767	0.0263	0.1126	0.2676	0.0914	0.1263	0.0715	0.0528	2.5429	0.3375	0.132	0.0849	0.2568	0.2551	0.223	0.2537	0.0903	0.2479	0.1884	0.0832	0.2413	1.136	0.1165	0.1238	0.4026	0.0663
55198	APPL2	adaptor protein, phosphotyrosine interaction, PH domain and leucine zipper containing 2	2.0848	0.2882	0.6963	0.5205	0.3147	0.6607	0.4281	0.2848	0.5386	0.4515	0.1394	0.3838	0.0219	0.3452	0.2062	0.3474	0.2485	0.0468	0.1172	0.0641	0.0558	1.2543	0.0447	0.1486	0.3141	0.5096	0.0598	0.1129	0.2295	0.2261	0.0924	0.0448	0.0627	0.3826	0.1736	0.2803	0.1195	0.3343	0.2022	1.094	0.0461	0.108	0.2105	0.2427	0.0284	0.2451	0.1107
3611	ILK	integrin-linked kinase	6.9838	4.3938	6.1779	5.971	7.7551	4.9878	8.1495	22.6614	6.5162	24.0078	2.3202	4.9198	0.6972	6.9111	6.7397	8.8394	2.4322	2.7358	1.8917	1.9551	9.823	12.4502	5.039	9.4306	14.0514	5.6992	9.2976	9.5779	4.1326	8.1037	14.798	6.9984	4.8188	11.0454	11.5395	5.9672	11.1902	12.3065	11.1374	4.4616	3.3237	3.1508	7.9349	6.0831	8.0055	13.7895	3.9222
55161	TMEM33	transmembrane protein 33	0.705	2.0678	1.2494	1.1171	2.6503	1.088	1.1746	2.0284	0.1773	1.321	0.5921	0.5523	0.0779	1.2942	0.524	1.5636	0.6643	0.4897	0.6356	0.8279	0.9514	1.0267	0.4004	2.1785	0.7159	1.0318	0.9694	1.0172	0.7376	1.6	1.116	1.0997	0.2207	1.5728	1.2504	0.7302	0.8402	0.7176	1.0666	0.4847	1.4136	0.9788	0.5423	1.252	0.8174	1.5101	2.0831
25939	SAMHD1	SAM domain and HD domain 1	8.2723	0.3838	16.2709	0.6734	8.7773	1.561	6.1403	1.2158	5.8842	4.6095	2.9972	0.7691	0.6546	1.3979	3.5757	1.4156	1.7795	0.3898	1.0131	0.1209	4.3597	1.4413	0.4861	1.7979	4.2783	0.9511	1.8239	0.6986	4.228	0.5806	2.8338	0.7942	2.8632	2.2824	4.88	1.0701	8.4445	0.7989	10.7348	1.5939	3.8574	0.1447	2.8319	0.2686	4.6746	0.875	4.3515
26137	ZBTB20	zinc finger and BTB domain containing 20	0	0.1209	0.0521	0.0301	0.0226	0.1973	0.1923	0.2566	0.1936	0.0529	0.2987	0.2837	0	0.1225	0.1305	0.1438	0.1249	0.1178	0.0608	0.0388	0.1366	0.4282	0.0383	0.0082	0.1452	0.1301	0.0875	0.0844	0.108	0.1915	0.1735	0.0415	0.1191	0.0881	0.1352	0.0597	0.151	0.1051	0.0981	0.2201	0.1877	0.1629	0.2451	0.0202	0.0338	0.2848	0.056
10573	MRPL28	mitochondrial ribosomal protein L28	0.1215	0.2906	0.2022	0.8091	0.7507	0.2827	0.2666	0.6892	0.5605	0.1741	0.5483	1.0323	0.0934	0.9595	0.0244	0.1887	0.1046	0.1875	0.0488	0.3799	0.6834	0.6358	0	0.2642	0.0238	0.8746	0	0.1084	0.0808	0.6915	0	0.1745	0	0.4244	0.0666	2.833	0.3933	0.3027	0.1698	0.1867	0.085	0.2133	0.283	0.3021	0.5497	0.3662	0.553
9060	PAPSS2	3'-phosphoadenosine 5'-phosphosulfate synthase 2	3.1297	0.7682	0.4496	2.0408	1.903	1.5224	0.3344	0.2192	0.5417	0.3147	1.7973	1.0297	0.0301	0.7431	8.8601	7.0526	3.5946	1.1394	0.0612	0.0537	0.2266	3.3342	0.0786	1.1956	0.2428	1.7449	0.0745	0.223	0.7269	0.7974	0.2833	0.1768	0.6989	0.8778	0.457	0.8431	0.2697	0.5939	0.5188	0.4663	0.7056	2.2824	0.1657	2.5594	1.0918	0.207	0.0362
2346	FOLH1	folate hydrolase (prostate-specific membrane antigen) 1	0.3189	0.0743	0.7194	0.3342	0.3634	0.5902	0.3201	0.0537	0.1974	0.5701	0.7319	0.4616	0.0422	0.1495	0.1907	0.0699	0.124	0	0.2964	0	0.5424	0.3327	0.1006	0.1811	0.2481	0.1645	0.2634	0.2242	0.0993	0.6267	0.0987	0.4536	0	0.1726	0.1747	0.8137	0.5988	1.1456	0.3073	0.2924	0.0179	0.0769	0.1037	0.2133	0.0822	0.0332	0.2098
5968	REG1B	regenerating islet-derived 1 beta	0.1352	0.5802	0	0	0	0	0	0.9001	0	0.0619	0	1.0616	0	0	0	0.6877	0	0	0	0	0	0	0	0	0	0	0	0.055	0	0.256	0	0.4868	0	0.0361	0	0.1305	0	0	0	0	0	0	0	0.1956	0	0.0475	0
8665	EIF3F	eukaryotic translation initiation factor 3, subunit F	5.7815	13.324	3.9651	79.1501	3.3156	3.1154	6.1229	166.318	43.1522	56.5366	9.3142	3.2287	0.5501	3.9395	5.2741	3.1607	2.3654	1.1152	2.472	1.0687	3.904	23.3543	0.8378	103.453	2.0799	4.6647	1.7487	3.8653	2.2337	3.2716	2.9503	4.9192	182.217	5.3198	3.9883	3.081	2.4076	3.1175	2.8948	2.257	49.1242	88.0988	2.7863	1.6499	115.81	94.5624	76.0688
6223	RPS19	ribosomal protein S19	9.7425	1.0256	5.6957	11.4865	6.4403	2.9614	3.033	2.0893	3.657	1.7963	24.668	3.9015	0.8294	3.2209	13.4215	5.4876	8.2764	2.1156	11.0635	1.9818	10.6653	7.0175	8.5875	5.3756	6.4475	3.8845	2.1437	2.3151	2.9183	6.3122	3.2485	1.5281	1.7559	3.7816	1.8923	2.1475	1.7136	2.1249	3.2269	2.0475	16.7146	0.4179	9.6345	1.054	1.5767	2.6822	1.1406
8209	C21orf33	chromosome 21 open reading frame 33	3.1111	17.3575	1.7141	83.3654	7.7723	58.5111	2.5033	35.9994	9.5661	43.7725	5.1713	60.4827	0.5979	57.1467	3.4295	31.8119	4.461	4.7918	1.905	2.5475	3.1369	32.3045	1.2401	43.8958	2.0615	28.5944	3.3712	49.3309	2.7822	75.4767	4.9028	94.7425	2.9671	31.2869	5.3787	59.1964	1.9653	44.2916	7.4172	39.0729	7.9732	29.6722	4.5018	40.031	3.6807	29.994	2.0437
9049	AIP	aryl hydrocarbon receptor interacting protein	1.1222	1.096	0.7055	0.9066	1.3263	1.0442	1.0885	1.2698	1.9296	2.3584	0.3643	1.4797	0.1068	1.8943	1.2187	1.1447	0.7412	0.5299	0.6388	0.286	1.0832	1.4931	0.3108	0.6119	0.8814	0.7069	0.7815	0.3957	0.652	1.3096	1.1954	0.4975	0.8989	2.4978	1.3331	0.7865	1.6453	1.0603	1.5266	0.8807	1.2266	0.3797	2.02	0.8597	0.7102	0.9335	0.6063
11240	PADI2	peptidyl arginine deiminase, type II	0.0702	0.1459	0.0621	0.1762	0.1751	0.1509	0.3103	1.418	0.2928	0.1184	0.1545	0.3423	0	0.3456	0	0.6724	0.0149	0.7922	0.0525	0.3598	0	1.4839	0	0.9311	0.027	0.0251	0	0.029	0	0.224	0.0061	0.2249	0	0.4141	0.02	0.1137	0.0079	0.3765	0	0.1311	0.0462	0.041	0.0087	0.0703	0.0836	3.8326	0.0309
7280	TUBB2A	tubulin, beta 2A class IIa	58.13	29.821	44.4541	53.2498	57.9124	52.076	70.34	66.356	84.8488	103.567	100.694	59.6509	9.8926	56.6406	45.9818	61.1486	27.6448	18.9386	28.7906	11.1526	48.9481	68.0973	9.8553	41.8639	38.5761	42.5291	33.4412	41.3321	42.6906	66.3553	55.395	45.1112	21.1276	50.0611	45.3584	30.2921	39.1507	49.56	48.2193	29.0664	55.2301	13.5238	74.7707	61.0616	42.0104	65.3283	34.7164
29087	THYN1	thymocyte nuclear protein 1	0.3466	0.1166	0.2052	0.4671	0.5507	0.5818	0.7662	0.3118	0.7285	1.0884	0.4736	0.6592	0.0588	0.4556	0.2949	0.548	0.1259	0.1731	0.0942	0.3197	0.5021	0.7119	0.125	0.2543	0.5141	0.3471	0.6074	0.7631	0.0921	0.5595	0.2369	0.3691	0.3472	0.8866	0.3956	0.4073	0.3841	0.5687	0.5	0.3647	0.5571	0.1126	0.3742	0.6988	0.6064	1.5862	0.0724
54491	FAM105A	family with sequence similarity 105, member A	0.0441	0	0.0821	0	0.1932	0.0332	1.513	0.2258	0.1391	0.033	0.2797	0.02	0.0322	0	1.6822	0	0.1288	0	0.0947	0.0627	0.1307	0.4304	0	0.0374	0.2349	0.0098	0.0146	0	0.0665	0.0152	0.0145	0	0.027	0.035	0.7275	0.016	0.1264	0.0122	0.0587	0.0286	0.1433	0	0.2482	0	0.1866	1.0828	0
92181	UBTD2	ubiquitin domain containing 2	0.0345	0	0.0735	0.0077	0.0311	0.0157	0.1363	0.0455	0	0	0.0081	0.0478	0.004	0.0096	0.0111	0.0126	0.0714	0.0077	0	0.0223	0	0.0257	0	0.0088	0	0	0.0187	0	0.0065	0	0.0039	0	0	0.0258	0	0	0.014	0.0273	0.0226	0	0	0	0	0	0	0.0567	0
10576	CCT2	chaperonin containing TCP1, subunit 2 (beta)	15.0343	8.8148	12.7535	11.7586	21.2644	30.5731	10.9283	16.0575	16.2814	15.1255	25.1108	13.0815	3.5678	10.1599	12.2656	12.8041	9.2517	3.1775	7.7141	3.9051	10.4208	16.4916	3.6894	9.0345	9.0098	7.9401	5.8309	11.3129	14.1637	18.6876	16.3367	12.3339	6.7907	21.5722	13.2988	20.1018	11.1335	21.3076	21.8208	13.9717	14.7263	3.6725	20.6279	9.7307	4.6756	11.2816	6.6785
6390	SDHB	succinate dehydrogenase complex, subunit B, iron sulfur (Ip)	6.0688	50.8512	14.3072	77.0976	12.3682	54.166	12.0875	68.9562	11.1121	47.3881	29.6962	42.084	1.3345	60.2472	7.2374	75.391	4.34	21.3988	4.6882	17.1562	7.5849	63.7657	3.4571	63.0809	6.507	74.728	3.2231	48.3731	4.4536	95.2614	4.4032	50.3345	3.0682	33.4042	10.0849	30.4761	4.0167	46.2263	4.7756	15.7894	14.4058	45.0375	13.6691	49.0941	2.6717	47.8543	2.8443
55667	DENND4C	DENN/MADD domain containing 4C	0.0879	0.0348	0.1003	0.0203	0.0714	0.026	0.0271	0.0876	0.0906	0.0098	0.0177	0.0353	0.0145	0.0629	0.0252	0.4701	0.0472	1.3246	0.8175	0	1.313	0.1104	0.0071	0.0891	0.1159	0.0152	0.0388	0.0446	0.0288	0.0677	0.0605	0.0196	0.0321	0.0662	0.0704	0.0129	0.0271	0.0232	0.0402	0.0311	0.0212	0.0085	0.0594	0.0326	0.0255	0.0268	0.0204
23048	FNBP1	formin binding protein 1	0.9446	0.0561	4.0939	0.5876	0.4164	0.5552	7.4174	0.0899	0.0058	0.0264	4.4409	1.1061	0	0.0396	1.4229	1.0999	0.5365	0	1.2167	0.0197	0.7029	0.0138	0	0.505	0.7817	0	0.1679	0.2826	0	0.557	0.2167	0.4561	0.1006	0.5308	1.3878	0	0.0544	0	0.1219	0.1316	0.0783	0	1.4359	0.4111	1.2406	0	0.1127
1160	CKMT2	creatine kinase, mitochondrial 2 (sarcomeric)	0.938	1.2563	1.0972	2.9804	0	1.4277	0	2.1717	0.1219	2.0374	0.055	6.822	0	3.0675	0	3.7455	0	0.6865	0	0.3157	0	2.5658	0	1.5998	0.0118	0.6726	0	0.8948	0	7.135	0.1602	1.9338	0	1.1839	0	1.5118	0.118	1.7454	0.0296	1.3122	0	0.8006	0.1785	1.9365	0	1.5884	0
5441	POLR2L	polymerase (RNA) II (DNA directed) polypeptide L, 7.6kDa	0.1622	0.2719	0.8668	1.1261	0.3825	0	0.7381	2.9622	1.4287	1.1084	5.4585	0.9406	0.0764	0.2211	0.925	0	0.536	0	0.3833	0	1.5055	0	0.2936	0	1.1941	0.9434	0.2485	0.1849	0.4845	0	0.6443	0	0	0.5456	0.8627	0.4865	0.5542	0	0.5611	0	0.8201	0	1.5408	0.2659	0.5981	0.6683	0.3449
23593	HEBP2	heme binding protein 2	6.1511	2.5852	6.6185	2.3876	6.4003	3.1013	1.3152	0.3992	2.3019	2.0681	3.2898	1.6458	0.2624	1.0122	3.4033	2.2949	1.7534	0.3787	1.0252	0.7559	3.3346	4.7797	0.8971	3.1973	1.7518	1.4187	1.4668	1.5947	1.4306	2.793	2.8237	1.9653	0.5134	2.9992	2.2578	2.1915	2.1298	2.4224	2.6113	1.7598	3.6773	0.2041	2.7911	0.9274	0.3876	2.0703	0.8647
83759	RBM4B	RNA binding motif protein 4B	0.6191	0.0575	0.1656	0.1094	0.2612	0.1163	0.2053	0.1026	0.0807	0.0653	0.0081	0.1901	0.002	0.0728	0.1046	0.1461	0.1024	0.045	0.0825	0.0926	0.3502	0.3712	0.0203	0.1561	0.0809	0.2054	0.0765	0.0801	0.054	0.1249	0.114	0.1437	0.0468	0.8545	0.2566	0.1514	0.1629	0.1717	0.0912	0.0365	0.1819	0.0384	0.1364	0.0326	0.0699	0.1389	0.0185
5411	PNN	pinin, desmosome associated protein	0.2338	0.0856	0.155	0.1135	0.1266	0.0944	0.3967	0.3395	0.2769	0.0897	0.4678	0.1787	0.0525	0.2393	0.2239	0.175	0.2244	0.109	0.9497	0.0786	0.1767	0.1754	0.0283	0.9168	0.0934	0.0623	0.0889	0.2223	0.3936	0.1358	0.1805	0.0486	0.2417	0.1899	0.3726	0.0575	0	0.1423	0.1366	0.1384	0.0536	0.0466	0.3585	0.0546	0.2193	0.3769	0.0656
55139	ANKZF1	ankyrin repeat and zinc finger domain containing 1	0.0101	0	0.0356	0	0.3768	0	0.0702	0	0.0219	0	0.3701	0	0	0.0357	0.0079	0.0267	0.0288	0	0.0265	0	0.0065	0	0.004	0	0.0073	0	0.0088	0	0.0141	0.0047	0.0049	0	0.0034	0	0.0399	0.0043	0.0095	0	0.0082	0	0.0487	0	0.0778	0.0142	0.0392	0	0.0029
60412	EXOC4	exocyst complex component 4	0.4624	0.2754	0.2538	0.1822	1.2588	2.0577	0.6193	0.3661	0.5466	0.4073	0.3066	0.4347	0.1026	1.2008	0.2256	0.0769	0.1304	0.1572	0.0797	0.0999	0.4515	0.7936	0.0682	0.1374	0.2357	0.2174	0.2246	0.9926	0.1834	1.4011	0.6851	0.9617	0.1101	0.1579	0.9522	0.1279	0.4365	0.4449	0.6168	0.1321	0.2606	0.3582	0.4031	0.2184	0.4419	0.3888	0.2876
1465	CSRP1	cysteine and glycine-rich protein 1	8.6118	10.2126	2.5602	22.128	24.4274	16.9818	4.8719	81.9535	5.6931	59.6512	0.497	10.3406	0.7769	35.2721	30.3446	30.5597	7.4374	14.8604	3.2298	7.3303	12.5922	13.3937	2.0186	12.2355	6.3254	4.5394	8.5702	31.3699	3.0345	14.5271	23.476	28.2797	2.4602	33.6276	5.9958	13.9803	7.3364	64.0436	9.355	16.0449	5.7431	37.6101	3.8495	13.5524	13.1574	53.7925	5.9706
5304	PIP	prolactin-induced protein	0.0679	0	0	0	0	0.0702	0	0.1453	0	0	0	0	0	0	0	0	0	0	0	0.0191	0	0	0	0.7445	0	0.0102	0	0	0	0	0	0	0	0	0	0	0	0	0	0.0304	0	0	0	0	0	0	0
101060415	LOC101060415	peptidyl-prolyl cis-trans isomerase A-like 4A/B/C-like	15.2803	11.3715	22.1393	18.526	22.0357	11.5794	27.5505	27.4947	35.106	35.9562	27.7639	4.8443	1.3576	30.3053	24.7345	39.7226	22.3541	12.3237	13.6214	1.4017	23.6697	12.5209	6.3805	13.5474	23.6136	3.0289	15.6814	12.2472	16.974	18.5403	23.2067	15.8095	7.4847	17.2604	25.6256	14.9211	19.2175	15.5173	20.9173	11.9913	47.2382	27.0321	39.5885	22.6817	91.2488	36.0747	23.8771
29078	NDUFAF4	NADH dehydrogenase (ubiquinone) complex I, assembly factor 4	0.2109	1.7705	0.172	2.455	2.3226	3.201	0	1.1296	0.7464	2.1582	0.1716	1.5143	0.034	0.989	0.0154	2.4917	0.1301	0.946	0.1857	0.8555	0.8	4.9756	0.1216	2.3206	0.3416	2.6631	0	1.8465	0.2113	2.0931	0.1539	2.9947	0.4128	5.7084	2.2023	1.3485	0.2279	3.9194	0.9566	2.4648	0.4746	0.1106	0.2681	1.3484	0.0625	1.2968	0.1536
89970	RSPRY1	ring finger and SPRY domain containing 1	0.01	0	0.0048	0	0.2773	0.009	0.0237	0	0.0148	0	0.0463	0.0216	0	0	0	0	0	0	0	0	0.0948	0.0498	0.0131	0	0.0235	0	0	0.0259	0.0476	0	0.0063	0	0	0.0113	0	0	0	0.0095	0.0263	0	0	0.0046	0	0.0177	0	0.2894	0
522	ATP5J	ATP synthase, H+ transporting, mitochondrial Fo complex, subunit F6	10.1828	21.5358	11.968	93.8221	45.2659	62.7772	10.8796	59.8008	11.1463	55.559	23.7546	39.6951	2.3438	128.101	6.0502	109.277	7.0913	41.5252	3.1713	11.866	14.2436	31.7782	3.3147	48.7036	6.7608	23.8498	8.7104	48.4018	10.1301	65.0911	5.4651	38.9575	5.9326	47.0249	20.0106	62.4867	12.1478	91.8768	23.6203	53.2023	15.9708	71.7648	17.5105	46.8371	9.9612	64.8183	6.5956
55697	VAC14	Vac14 homolog (S. cerevisiae)	0.5497	0.1827	0.4662	0.2815	0.5707	0.3676	0.7242	0.6394	1.4917	0.9071	0.8975	1.0136	0.0981	0.5867	0.4713	0.2925	0.5796	0.1699	0.0814	0.0365	0.4321	0.4761	0.0657	0.7107	0.1992	0.1867	0.1538	0.3722	0.1883	0.4006	0.3152	0.2381	0.1828	0.3009	0.586	0.2382	0.2425	0.3139	0.2255	0.1574	0.3385	0.2196	0.4178	0.562	0.327	0.2278	0.2014
83743	GRWD1	glutamate-rich WD repeat containing 1	0.0952	0	0.0584	0.0106	0.0979	0	0	0.0204	0.1617	0.0141	0.1406	0	0	0	0.0632	0.046	0.0501	0.0411	0	0.012	0.0236	0.0363	0.0046	0	0	0	0.0565	0.0265	0.0149	0.0419	0.071	0.0326	0.0772	0.0419	0.0885	0	0.062	0.0482	0.1047	0.0149	0.0196	0	0.1338	0	0	0.0389	0.0258
8723	SNX4	sorting nexin 4	3.8022	1.0193	1.2573	2.2577	2.4118	2.0145	1.9918	0.5455	0.9744	1.8225	0.9891	1.9233	0.0954	1.4342	0.4884	1.3586	0.8838	0.0592	0.3961	0.0632	1.6122	1.9863	0.0869	2.2887	0.489	1.0433	0.7151	0.9987	0.5588	1.4194	0.6225	1.3018	0.6116	1.3604	0.7602	1.6646	0.8172	1.7576	0.9096	0.9002	2.0208	1.4012	0.9424	1.4839	1.0268	0.3562	0.7547
1611	DAP	death-associated protein	0.0281	0.0086	0.2251	0.6825	0.4488	0.1401	0.0404	0.0284	0	0	0.0088	0	0.002	0.0827	0.0716	0.421	0.3203	0.1406	0.1702	0.2981	0.0299	0.1499	0.0509	0.1906	0.1065	0.1525	0.2782	0.2641	0.3244	0	0.2579	0.2992	0.0248	0.8672	0.1687	0.3646	0.1982	0.1843	0.1702	0	0.0204	0.0454	0.0312	0	0.0153	0.1628	0.0071
23046	KIF21B	kinesin family member 21B	0.008	0.0026	0.0016	0	0.0343	0.0975	0.0061	0.0033	0.0839	0.0143	0.0455	0.0017	0	0.0069	0.0469	0.0902	0.0376	0.0122	0.0388	0.0147	0.0642	0	0.0054	0.0401	0.0008	0.0053	0.0253	0.0287	0.0167	0.07	0.0383	0.0185	0.0026	0.0239	0.0509	0.0436	0.0118	0.0392	0.059	0.0443	0.0013	0	0.0067	0.0173	0	0.0026	0
3708	ITPR1	inositol 1,4,5-trisphosphate receptor, type 1	0.1151	0.0526	0.1054	0.0456	0.2343	0.1185	0.7323	1.0253	0.531	0.1153	0.3287	0.2177	0	0.2681	0.0789	0.2335	0.0451	0.0258	0.0189	0.0307	0.7026	0.0828	0.0084	0.0552	0.546	0.0594	0.0107	0.0401	0.0153	0.4052	0.0327	0.3257	0.0094	0.1004	0.0648	0.5615	0.0255	0.4422	0.2445	0.4474	0.1759	0.052	0.1679	0.0699	0.0957	0.683	0.1986
128864	C20orf144	chromosome 20 open reading frame 144	0.1589	0	0	0	0.0766	0	0	0.0381	0	0	0	0	0	0.0273	0.0188	0	0	0	0	0	0	0	0	0	0	0	0	0	0.2239	0	0	0	0.024	0	0.119	0	0	0	0	0	0	0	0	0	0.2756	0.0252	0
55335	NIPSNAP3B	nipsnap homolog 3B (C. elegans)	0.0773	0.2829	0.2946	0.367	0.7684	1.0167	0.2517	0.7984	0.404	0.593	0.3036	0.5716	0.0444	0.4663	0.6436	1.0032	0.2425	0.3795	0.0906	0.1503	0.1931	0.4898	0.1145	0.4015	0.1327	0.2579	0.1726	0.7936	0.2176	0.6503	0.0605	0.3906	0.1613	1.1728	0.6713	0.6688	0.1574	0.5336	0.2377	0.5715	0.0748	0.2692	0.2796	0.2293	0.6119	0.8098	0.1426
8891	EIF2B3	eukaryotic translation initiation factor 2B, subunit 3 gamma, 58kDa	0.2484	0.1622	0.2188	0.3133	0.11	0.1848	0.6908	0.76	0.8629	0.5549	0.0532	0.3575	0.0296	0.278	0.404	0.2141	0.0988	0.1835	0.2916	0.1571	0.2456	0.2372	0.0688	0.1052	0.4891	0.1951	0.1914	0.0732	0.1314	0.2251	0.3478	0.1511	0.1085	0.2356	0.4085	0.2189	0.1969	0.1792	0.3283	0.0776	0.3079	0.0385	0.6923	0.2996	0.5421	0.4126	0.1881
23131	GPATCH8	G patch domain containing 8	0	0	0	0	0	0	0	0	0.0139	0	0	0	0	0	0	0	0.0048	0	0	0	0	0	0.0511	0	0.0596	0	0	0	0	0	0	0	0	0	0	0	0	0	0.026	0	0	0	0.0204	0	0.0755	0	0
9144	SYNGR2	synaptogyrin 2	5.2414	0	2.9683	0.5553	1.4112	0.4036	0.1466	0.0957	0.0445	0	4.5965	0.3008	0.022	0	1.0074	0.0964	1.0665	0	1.022	0.3874	1.7304	1.2095	0.2229	1.1072	1.2997	0.184	0.1536	0.1696	0.3407	0.0898	0.3914	0.2582	0.118	0.1792	0.2428	0.0661	0.0421	0.0933	0.2456	0.1271	2.4221	0.0306	2.3426	0.0182	1.8307	0.0735	0.0442
27067	STAU2	staufen double-stranded RNA binding protein 2	0.1556	0.0136	0.0521	0	0.4997	0	0.0856	0.0292	0.1309	0.0114	0.0367	0.0372	0.0077	0.0523	0.0325	0.312	0.1937	0.028	0	0.0593	0.0075	0.0224	0.0049	0.0233	0.0193	0.0439	0.8225	0.0554	0.0172	0.022	0.0382	0.0878	0.1427	0.0234	0.4442	0.032	0.0129	0.067	0.1723	0.0637	0.0422	0	0.1642	0.0437	0.0476	0.0085	0.0493
64146	PDF	peptide deformylase (mitochondrial)	0.0961	0.5929	0.0662	0.3335	0.2771	0.8877	0.1129	0.3315	0.1126	0.8456	0.5903	0.9694	0.0048	0.8728	0.0281	1.2692	0.1683	0.1436	0.1488	0.0215	0.0399	0.6609	0.1453	0.9073	0.0322	0.6166	0	0.3666	0.0126	0.7986	0.0222	0.3651	0	0.5254	0.143	0.6042	0	0.6199	0.0657	0.3417	0.3046	0.2222	0.1681	0.7673	0.0153	0.3198	0.0103
3674	ITGA2B	integrin, alpha 2b (platelet glycoprotein IIb of IIb/IIIa complex, antigen CD41)	0.0061	0.2999	0.1591	0.0044	0.0044	0	0.2005	0.0072	2.1171	0.0089	0	0	0.0052	0.0026	0.0121	0	0	0.0075	0.0473	0.0163	0.0573	0.0101	0.0329	0.0066	0.051	0.0113	0.0498	0.143	0.0033	0	0.3368	0.0265	2.5073	0	0.0164	0.0459	0.049	0.1171	0.0037	0.0103	0.0063	0	0.0038	0.0036	0.2855	0.0077	0
55862	ECHDC1	enoyl CoA hydratase domain containing 1	14.8968	10.5687	4.2412	13.8912	6.7993	12.2006	1.9452	6.3804	4.9308	19.7106	1.1784	9.4048	1.6683	12.9687	3.4811	15.3493	5.8157	1.6027	4.0265	1.0518	8.5399	14.4033	1.0296	11.5666	2.976	10.5358	3.0246	11.664	7.1356	27.9377	5.4431	16.1445	1.2205	20.5532	5.6101	10.8211	3.8115	16.5122	4.7623	8.1093	3.4175	11.814	3.9543	20.9072	2.5166	6.2152	9.4791
7965	AIMP2	aminoacyl tRNA synthetase complex-interacting multifunctional protein 2	0.8778	0.5529	0.4803	0.5083	1.2	0.9937	1.0182	1.0738	1.3375	1.1841	0.6851	0.9365	0.0782	0.6161	0.3444	0.8028	0.5425	0.2676	0.4223	0.1887	0.9625	2.3094	0.1114	0.6042	0.4428	0.5095	0.209	0.5222	0.5662	0.8227	0.6235	0.9792	0.3009	1.0028	1.4098	0.8141	0.7792	0.9931	1.0374	0.8404	0.9982	0.5749	0.7257	0.4959	1.3861	0.8081	0.6982
25820	ARIH1	ariadne homolog, ubiquitin-conjugating enzyme E2 binding protein, 1 (Drosophila)	0.3959	0.0093	0.1097	0.2419	0.1589	0.1926	0.0141	0.0499	0.1183	0.0716	0.1087	0.0756	0	0	0	0	0.0194	0	0.03	0.0366	0.3465	0.1291	0.0029	0.0612	0.0094	0.0539	0.1097	0.0086	0.0749	0.1073	0.3462	0.122	0.0527	0.1531	0.1088	0.0874	0.1728	0.0815	0.1653	0.1044	0.0506	0.0328	0.0354	0.0243	0.0733	0	0.0922
100	ADA	adenosine deaminase	0.7297	0.0105	1.2968	0.0148	2.7093	0.0111	0.5432	0.0091	2.1402	0.0826	6.3808	0.0208	0.0995	0.1923	0.3335	0	0.0794	0.0072	0.3638	0	1.4348	0.0232	0.0625	0	0.2768	0.0101	0.0714	0.0147	0.0649	0.0313	1.109	0.02	0.1252	0.0281	0.1152	0.0096	0.4784	0.0201	0.1912	0.0158	0.2882	0.0331	0.2751	0.0113	0.2013	0.0234	0.1362
124245	ZC3H18	zinc finger CCCH-type containing 18	0.03	0.0152	0	0	0.0282	0.006	0.0291	0.0262	0.0211	0.0154	0	0	0.0074	0.0447	0.0142	0.0177	0.0128	0.0092	0.01	0	0	0	0.0762	0.1502	0	0	0.0154	0.0126	0.0408	0.0072	0.0221	0.0108	0.088	0.0165	0.054	0.0936	0.0145	0.0832	0.0262	0.0361	0.0383	0.0053	0.0619	0.0055	0.0173	0.0292	0.0267
3689	ITGB2	integrin, beta 2 (complement component 3 receptor 3 and 4 subunit)	1.3473	0.0262	1.9745	0.1751	2.5424	0.0555	1.134	0.0231	0.9811	0.8056	1.805	0.086	0.1892	0.329	0.6509	0.0204	0.4182	0.0081	0.2915	0.1617	0.7026	0.1255	0.1078	0.0801	0.5824	0.2524	1.1228	0.0241	0.2024	0.0361	0.3303	0.0448	0.2608	0.3566	1.0872	0.0021	0.5127	0.036	0.5452	0.1443	0.2168	0	0.3425	0	2.0706	0.0344	0.4726
6714	SRC	v-src sarcoma (Schmidt-Ruppin A-2) viral oncogene homolog (avian)	3.1717	0.1304	0.3162	0.1302	0.5884	0.2094	0.439	0.1785	0.7008	0.5356	0.3444	0.1296	0.0143	0.107	0.226	0.1444	0.1637	0.0871	0.1246	0.0651	0.2512	0.1938	0.0928	0.1056	0.2902	0.0916	0.1498	0.1409	0.1931	2.2816	1.4185	0.2274	0.1677	0.8789	0.3533	0.9511	0.7745	0.1913	0.0556	0.8293	0.1864	0.1446	0.2725	0.1137	0.3089	0.0605	0.9449
79634	SCRN3	secernin 3	0.3319	0.3052	1.7405	0.1004	3.2374	1.2372	0.036	0.8912	1.0723	0.2632	0.1471	0.9705	0.0106	0.0682	0.3913	0.1416	0.0852	0.0303	0.0555	0.0384	0.0665	0.9145	1.8147	0.6288	0.1063	0.0379	0.0563	0.0892	2.1791	0.0996	2.0393	0.9137	1.9486	0.141	4.3545	0.8643	2.2619	0.2169	4.0536	1.535	0.1014	0.4435	0.0353	0.0334	1.1455	0.2886	1.416
3628	INPP1	inositol polyphosphate-1-phosphatase	1.5099	0.2837	0.9334	0.2617	0.7653	0.2418	0.4466	0.1177	2.6649	1.2918	0.2806	0.2403	0.0467	0.184	0.0298	0	0.0508	0.0063	0.084	0.0576	0.2428	0.3598	0.0514	0.3409	0.3294	0.279	0.1831	0.1145	0.1745	0.2336	0.2406	0.159	0.1785	0.2319	0.2331	0.1493	0.2563	0.2625	0.2032	0.3043	2.4577	0.1044	0.2119	0.2085	0.3314	0.2173	0.1864
8343	HIST1H2BF	histone cluster 1, H2bf	12.0876	15.7737	78.1593	35.5314	54.3685	142.796	23.2737	20.4213	78.7862	152.213	139.636	66.9957	4.3441	20.9941	48.9626	115.314	48.9942	29.9662	23.5635	6.6706	179.695	53.2189	69.5243	55.2069	89.5342	76.6166	109.557	62.5384	59.0125	88.0939	130.237	60.0953	40.3477	133.955	113.29	87.9127	80.9018	78.9784	135.281	72.1355	34.3232	3.0736	33.4804	47.4359	25.7936	149.939	14.8262
8994	LIMD1	LIM domains containing 1	0.0858	0.0346	0.1253	0.0019	0.0285	0.0345	0.0125	0.0173	0.0707	0.0162	0	0.0083	0.0127	0.0351	0.0192	0.1656	0.0058	0.0081	0.0085	0.0024	0.3561	0	0.0016	0	0.0257	0.0607	0.0336	0.0084	0.0636	0.0625	0.0746	0.02	0.1082	0.0816	0.0417	0.0332	0.0396	0.1509	0.1403	0.0334	0.0926	0	0.0396	0.0119	0.0437	0.0235	0.0145
8367	HIST1H4E	histone cluster 1, H4e	45.0841	20.3415	253.594	194.84	251.097	132.489	64.8496	45.8245	181.018	387.16	317.735	60.0252	22.2823	35.7052	349.848	167.609	257.572	117.165	142.745	80.1824	363.609	60.7999	95.7306	51.6642	205.655	70.7305	282.854	159.129	199.524	61.7923	261.708	114.649	131.833	219.54	281.903	103.493	153.259	72.4884	260.199	132.737	199.59	2.2379	92.3212	5.6023	103.173	194.476	87.5775
5358	PLS3	plastin 3	7.4658	7.0057	5.3804	13.5383	7.6321	9.055	7.2883	14.3471	10.0619	25.0036	12.0686	12.2613	0.8093	9.8789	3.9727	8.4781	1.7419	4.2184	3.0102	2.8567	4.5821	9.753	0.7769	10.4829	3.9246	5.2606	3.1937	5.5925	2.7059	15.6172	4.161	6.7832	1.6117	9.9651	2.8475	6.9339	2.3795	7.4637	3.0824	8.0439	5.2281	7.2251	7.0639	9.0041	5.3327	14.2392	2.0544
326625	MMAB	methylmalonic aciduria (cobalamin deficiency) cblB type	3.0381	3.5507	3.9385	11.1403	3.3451	5.0253	5.3857	6.1538	12.9664	8.1273	4.9413	6.0669	0.7577	11.8626	0.1243	5.8202	0.3172	1.063	0.2022	0.9371	2.8218	5.1815	2.5223	5.3743	0.8757	9.4119	0.2542	0.9025	0.3504	3.9138	0.616	5.2355	0.882	2.8895	0.9419	1.455	0.3159	12.2939	1.7491	2.167	6.023	2.4892	4.007	5.5832	1.0495	2.757	0.1849
6928	HNF1B	HNF1 homeobox B	0.0476	0.7432	0.0074	0.6729	0.0116	0.013	0.0379	0.0848	0.1244	0.1179	0	0.6527	0.005	0.4742	0.0072	0.0721	0.1115	0.0395	0.0219	0.0013	0.0615	0.091	0.012	0.0204	0.0248	0.2775	0.0372	0.0626	0.0281	0.1795	0.0331	0.0288	0.0399	0.4621	0.0198	0.6013	0.0057	0.5742	0.0513	0.0178	0.3282	0	0.0072	0.0576	0	0.0951	0.0536
23767	FLRT3	fibronectin leucine rich transmembrane protein 3	0.004	0.0204	0	0.1096	0.0302	0.0912	0	0.1451	0.2222	0.5518	0	1.2852	0.0043	0.2252	0.1723	1.1045	0.0472	0.0281	0.2594	0.0137	0.0634	0.1061	0.0482	0.0481	0.0483	0.0184	0.0527	0.0268	0.0326	0.4461	0	0.0179	0.0348	0.1842	0.0432	0.0763	0.108	0.0941	0.0341	0.0769	0	0.1751	0	0.0539	0.0199	0.073	0
5317	PKP1	plakophilin 1 (ectodermal dysplasia/skin fragility syndrome)	0	0	0	0	0	0	0	0	0	0	0	0	0	0	0	0	0	0	0	0	0	0	0	0	0.0053	0	0	0	0	0	0	0	0	0	0	0	0	0	0	0	0	0	0	0	0	0	0
123228	SENP8	SUMO/sentrin specific peptidase family member 8	0.0828	0	0	0.0392	0	0	0	0.0672	0	0	0	0	0	0.0636	0	0	0	0	0	0.0073	0.0452	0	0	0	0.0329	0.007	0	0	0	0.0218	0	0	0	0.1331	0	0.0328	0.009	0.1883	0.3548	0.0196	0.064	0	0.0234	0	0.0159	0	0.129
2039	DMTN	dematin actin binding protein	0.2437	0.944	0.5212	0.8006	1.6587	1.2212	0.8056	0.7993	0.2583	0.7358	0	0.5418	0.5186	2.4109	0.3375	0.9691	0.6356	0.7607	1.0004	0.7801	0.4405	1.1348	0.3173	0.6856	0.419	1.0593	0.6952	0.7696	0.6009	1.5001	0.2	1.1408	0.5597	0.9008	0.5132	1.3583	0.561	0.9188	0.2897	0.7448	0.1561	0.3498	0.1051	0.5973	1.8274	0.9351	0.3596
374882	TMEM205	transmembrane protein 205	6.5206	13.429	25.4244	28.7433	18.4018	4.5131	49.9124	11.5583	8.9104	9.9637	19.6761	23.8185	7.5417	22.524	12.1141	18.5574	10.0274	6.7748	10.4395	0.8471	10.4024	17.9965	1.6393	18.6951	4.7166	10.8101	20.635	1.4139	7.6831	3.5962	10.2229	1.1215	3.1179	26.6074	15.3873	2.528	4.24	32.1801	7.2716	10.5046	29.7551	21.8528	7.6116	19.5338	34.4703	7.6717	7.9894
2184	FAH	fumarylacetoacetate hydrolase (fumarylacetoacetase)	22.1087	7.1643	4.776	22.1715	6.9624	13.1292	5.5999	3.0659	4.239	12.4353	2.9923	10.9639	2.8282	7.8118	2.129	8.124	2.3808	0.4476	1.6023	0.1219	2.5241	24.1543	0.7976	10.9311	1.6029	9.9756	2.1322	9.8329	2.8832	39.4135	2.034	10.0316	1.6172	12.8377	11.8549	19.8919	1.2594	12.6423	4.3462	7.4107	6.5952	3.6301	4.2015	17.6514	3.107	7.3366	3.1998
80896	NPL	N-acetylneuraminate pyruvate lyase (dihydrodipicolinate synthase)	0.3104	2.0293	0.0658	5.0499	0.2528	4.5447	0.1679	0.7039	0.9294	7.36	0.0209	0.6263	0.015	2.0432	0.0129	0.6032	0.1371	0	0.0167	0	0.2534	5.718	0.0409	3.6568	0.2168	3.2287	0.1145	1.0289	0.1028	5.1102	0.0492	2.7507	0.2356	1.4914	0.5292	2.8425	0.1461	1.7074	0.4446	1.1242	0.0283	1.6767	0.1183	2.5021	0.2224	0.5409	0.444
27143	PALD1	phosphatase domain containing, paladin 1	0.3906	0.0024	0.0289	0	0.7489	0.26	0.0338	0.011	0.0716	0.0128	0.0265	0.0407	0	0.0038	0.0956	0.007	0	0	0.0202	0	0.0775	0.0027	0.0594	0.003	0.0502	0.0032	0.1866	0.1512	0.0862	0.0624	0.2525	0.1663	0.0205	0.0295	0.3001	0	0.1622	0.0832	0.0352	0.0277	0	0	0.0066	0	0.1204	0	0.0266
9446	GSTO1	glutathione S-transferase omega 1	68.3524	9.5065	18.6137	34.3216	34.3658	48.7046	38.9186	19.6466	15.7792	24.4164	63.7558	22.044	9.1857	22.9533	15.1735	12.1491	14.5914	2.7194	12.9557	3.9703	28.2008	30.6227	6.4634	45.1455	11.6005	25.1993	9.8745	28.9885	15.3862	52.9487	25.8419	24.8591	6.8221	25.646	17.6637	18.5	17.9804	18.2492	23.3378	10.6719	33.8882	14.1146	17.6569	27.9108	42.9624	11.3638	16.1144
54518	APBB1IP	amyloid beta (A4) precursor protein-binding, family B, member 1 interacting protein	0.2003	0	0.1306	0.0061	0.4148	0	0.2878	0	0.3035	0	0.2585	0	0.0088	0	0.1118	0	0.0394	0	0.0306	0.0119	0.2719	0.3702	0.0623	0	0.3107	0.008	0.0506	0	0.1551	0	0.2043	0	0.146	0.02	0.2131	0.0068	0.2422	0.0098	2.115	0	0.1799	0	0.0791	0	0.3622	0	0.1648
4926	NUMA1	nuclear mitotic apparatus protein 1	1.1666	0.4376	1.0545	1.9403	1.2438	1.6196	1.3858	1.1649	0.9212	1.4169	0.6819	1.1032	0.1413	0.7651	1.2408	0.9796	0.6155	0.6385	1.9229	0.5122	1.8424	2.2107	0.8107	1.0737	1.2823	0.7145	1.109	1.1178	0.9781	1.0428	1.8606	1.01	0.8549	1.4899	1.9313	1.2864	0.9379	1.0318	1.3589	1.0809	5.8255	0.7974	1.7444	0.6228	1.6331	1.5736	0.6344
63898	SH2D4A	SH2 domain containing 4A	0.0206	0	0	0	0.0643	0	0	0.028	0	0	0.0971	0.0169	0	0	0	0	0	0.0191	0	0	0	0.0038	0	0	0	0	0	0.0072	0	0.0176	0.0224	0	0	0.0359	0.0229	0.0054	0	0.0195	0.0071	0.0132	0	0	0.1732	0	0.0168	0.0114	0
6416	MAP2K4	mitogen-activated protein kinase kinase 4	0.1428	0.181	0.0724	0.2069	1.3988	0.3175	0.9089	0.7751	0.6053	0.5452	0.0551	0.0739	0.114	0.2149	0.4556	0.5176	0.2695	0.0766	0.2062	0.3331	0.3813	0.5558	0.0612	0.2548	0.2315	0.2433	0.6047	0.6453	0.4329	0.9197	0.4604	1.1087	0.1366	0.2118	0.783	0.3467	0.9089	0.2424	0.3072	0.5393	0.0857	0.7849	0.4598	0.2892	0.2991	0.1785	0.2589
23654	PLXNB2	plexin B2	0.4985	0.2055	0.8891	0.8166	0.9384	0.8488	0.7532	0.5035	0.416	0.8125	1.0344	0.5374	0.0537	0.3661	0.4372	1.8866	0.4384	0.1739	0.1819	0.1132	0.3312	1.1757	0.1557	0.8061	0.6078	0.5976	0.4949	0.3205	0.3305	0.236	0.4179	0.3451	0.2256	0.3546	0.8663	0.454	0.3207	0.6136	0.5442	0.5469	0.6058	0.3165	0.9564	0.66	0.4036	0.6528	0.1198
65123	INTS3	integrator complex subunit 3	0.0517	0.0213	0.1156	0.0011	0.0784	5.1883	10.2586	3.3399	0.0771	0.0681	0.0436	0.023	0.0034	0.0274	0.507	0.8897	0.6199	0.4121	0	0.042	0.1206	0.0266	0.0495	0.0393	0.0342	0.0061	0.028	0.0239	4.7338	4.8409	8.8955	14.5388	0.0048	3.608	10.2463	0.2408	0.034	0.0018	0.0306	0.0427	0.1279	0.0169	0.0643	0.011	0.1022	0.1937	0.1488
202	AIM1	absent in melanoma 1	1.1595	0.0251	0.044	0.0354	0.3891	0.0131	0.3685	0.0361	0.1083	0.0098	0.6439	0.0337	0.0041	0.0066	0.0589	0.3269	0.0151	0.0686	0.0763	0.0067	0.0535	0.1861	0.0129	0.1774	0.0476	0.0257	0.0743	0.022	0.0766	0.0264	0.148	0.0558	0.109	0.0752	0.1974	0.0119	0.1875	0.0278	0.2218	0.0319	0.1132	0.0039	0.7035	0.0215	0	0.0413	0.1512
201931	TMEM192	transmembrane protein 192	6.1241	1.3983	8.5098	1.5763	0.1893	0.7762	16.1738	0.4669	1.5702	1.3459	0.1179	8.3886	3.0645	7.0455	9.5754	0.4636	3.9591	0.5009	1.5855	1.8515	0.1926	10.5362	0.6945	6.6621	4.651	3.1983	0.1797	0.1493	0.3086	5.1371	0	0.3499	0	4.0504	0	4.3349	0.134	0.5369	0.0917	0.0057	3.2432	0.1083	0	4.8994	0.0724	6.3856	10.2704
866	SERPINA6	serpin peptidase inhibitor, clade A (alpha-1 antiproteinase, antitrypsin), member 6	0.7299	1.0625	1.1019	0.6637	0.7243	1.1888	0.7054	0.8719	0.4629	0.071	0.925	0.4428	0.2303	0.1873	1.316	0.2967	1.6138	1.5167	1.5713	0.8321	6.7128	4.5965	0.2224	1.6755	5.5988	0.8411	1.1926	0.9534	1.2153	0.2499	1.3548	2.0474	0.5773	0.6384	1.5357	0.5463	0.8991	0.8281	0.8464	1.3844	2.8988	1.1543	1.0194	0.8602	0.9009	0.873	1.4513
54539	NDUFB11	NADH dehydrogenase (ubiquinone) 1 beta subcomplex, 11, 17.3kDa	0.2376	0.3887	0.2068	1.3406	0.1446	1.535	0.1212	1.7485	0.2672	0.672	0.3994	1.3553	0.0095	1.1225	0.0766	0.8142	0.0257	0.5522	0.195	0.7025	0.1683	2.0347	0.0384	1.6898	0.1818	0.9939	0.0162	0.7618	0.028	1.1497	0.028	1.0125	0	1.2393	0	0.5413	0.0478	1.7139	0.3178	1.1033	0.5063	0.6291	0	0.8967	0	1.2504	0.0649
9221	NOLC1	nucleolar and coiled-body phosphoprotein 1	0.0957	0	0.0179	0.0215	0.0926	0.0364	0.0336	0	0.0874	0.0899	0	0	0.0054	0.0146	0.0359	0.0432	0.0488	0.0232	0	0	0.0218	0	0	0	0	0	0.0093	0.0255	0.0079	0.0398	0.0555	0.0309	0.0039	0.0774	0.2838	0.0365	0.0685	0.0091	0.0383	0.0466	0	0	0.0297	0	0.0303	0.1174	0.0253
283209	PGM2L1	phosphoglucomutase 2-like 1	0.9156	0.0094	0.0611	0.0235	0.32	0.0148	0.1685	0.049	0.3158	0	0.7822	0	0.0726	0.0442	0.0291	0	0.0087	0.0038	0.0576	0.0124	0.2718	0.0043	0.1133	0	0.1028	0.0123	0.055	0.2632	0.0364	0.0046	0.1504	0	0.0269	0	0.105	0	0.245	0	0.3343	0	0.0395	0.0081	0.4761	0	0.3886	0.0595	0.0637
3020	H3F3A	H3 histone, family 3A	0.2522	2.1607	48.3531	79.4656	107.528	257.316	1.5993	5.8969	23.006	109.063	16.2111	10.2329	2.2639	4.088	0.687	0.8882	1.9708	0.1959	14.4421	4.5253	90.282	26.2561	15.24	10.3306	33.6867	12.7952	61.6194	82.1679	59.6912	36.6426	120.456	91.6541	74.4579	199.246	84.9499	56.7098	36.8233	85.9315	129.54	119.362	23.5	1.009	2.4898	1.2925	18.4167	77.6255	34.1229
2327	FMO2	flavin containing monooxygenase 2 (non-functional)	0.1019	0.0023	0.0049	0.0403	0.0016	0.0561	0.0007	0	0.0063	0.0184	0	0.0025	0	0.0057	0	0.0048	0	0	0.0146	0	0.0106	0.1032	0.0039	0.1012	0	0.0751	0.0022	0.0444	0	0.075	0.0036	0.0665	0.0013	0.0207	0	0.0239	0.0035	0.0207	0.0027	0.0083	0.0009	0.0083	0	0.0061	0	0	0.0005
9663	LPIN2	lipin 2	0.0177	0.0388	0	0.0404	0.023	0.0423	0.0245	0.4422	0	0.0276	0.01	0.3184	0	0.0325	0.2784	0.043	0.0068	0	0	0.0469	0.011	0.436	0.0011	0.0453	0.0234	0.1865	0.013	0.0466	0.0637	0.1203	0.0213	0.0783	0.0207	0.0673	0.0451	0.0634	0.0404	0.0406	0.0208	0.0841	0.0818	0.0135	0.0139	0.0277	0.0143	0.0244	0.0081
377677	CA13	carbonic anhydrase XIII	0.3142	0	0	0	0.0388	0	0	0	0	0	0	0.0237	0	0.0267	0	0	0	0	0	0	0	0	0	0	0	0	0.0346	0.0289	0	0.0244	0	0	0	0	0	0.0265	0	0	0	0	0	0	0	0.0149	0	0	0.3084
101060582	LOC101060582	myomegalin-like	0.0102	0	0	0	0	0	0	0	0	0	0	0	0	0	0	0	0	0	0	0	0	0	0	0	0	0	0	0	0	0	0	0	0	0	0	0	0	0	0	0	0	0	0	0	0	0	0
259266	ASPM	asp (abnormal spindle) homolog, microcephaly associated (Drosophila)	0.0744	0	0.0315	0.0701	0	0.0033	0.012	0	0.0611	0.2001	0.0238	0.0228	0	0	0	0	0	0	0	0	0	0	0	0	0	0	0	0.1018	0	0	0	0	0.0589	0	0	0.1064	0.0152	0.0241	0.022	0	0.0134	0	0	0.0154	0	0	0.1013
9076	CLDN1	claudin 1	0.065	0	0.0215	0	0.3281	0.0318	0	0	0	0.1391	0.0486	0.07	0	0.0509	0.0189	0	0	0	0	0	0	0.0159	0	0	0	0	0	0	0.1265	0.0917	0.0574	0.0144	0.0254	0.0542	0.2802	0.174	0	0.0305	0.1331	0.0374	0.1898	0	0.1241	0.0213	0	0.0253	0
6697	SPR	sepiapterin reductase (7,8-dihydrobiopterin:NADP+ oxidoreductase)	19.4291	2.7438	2.1877	5.3374	9.6381	6.9371	1.7305	6.1469	5.4634	4.1642	5.1593	4.4707	0.5282	4.2916	1.5837	6.2482	1.2809	1.3803	0.4779	0.8494	23.9308	4.9044	0.32	9.3741	15.9176	7.7652	1.5998	3.4669	1.7737	5.6866	1.1144	4.6543	1.2339	5.0915	2.9336	4.3038	1.7849	7.8539	2.1373	2.9959	8.4609	5.0127	2.7449	4.0752	5.9862	3.5251	1.1243
51142	CHCHD2	coiled-coil-helix-coiled-coil-helix domain containing 2	9.8393	2.5925	0.7565	1.1627	3.2211	3.1705	1.1803	0.6337	3.8292	1.6917	6.7762	1.0362	0	0	2.9541	3.8095	9.6648	0.9283	1.0823	1.2181	0.4719	1.3119	0.4399	10.7628	1.5047	0.8346	0.6155	1.1053	11.358	0.9122	0.6196	1.6269	0.1893	1.1314	26.4521	1.3514	1.1487	1.1525	0.9123	0.6137	3.6857	1.0977	11.5278	1.159	11.9821	12.7002	0
140606	SELM	selenoprotein M	0.9764	0.1294	0.1042	0.3442	0.2753	0.5079	0.2764	0.2922	0.0667	0.8518	0.089	0.265	0.02	0.2613	0.155	0.0577	0.1733	0.1609	0.0634	0.1645	0.3056	0.4902	0.038	0.3452	0.1023	0.1659	0.5583	0.5773	0.1141	1.0419	0.3617	0.7035	0.8371	1.0172	0.5772	0.5485	0.4297	0.9885	0.2318	0.8586	0.1002	0	0.0543	0.0341	0	0.6887	0.1488
101060439	LOC101060439	ras-related protein Rap-1b-like protein-like	7.6623	5.0979	7.4349	10.1586	18.1942	12.4126	12.417	7.4118	12.0968	12.5744	15.0987	9.1609	0.9491	4.7592	4.3415	6.1897	2.0324	2.5606	3.8507	1.1267	6.1712	11.0007	2.7034	7.1881	4.0054	6.9342	5.379	10.0468	4.0644	10.57	7.4191	8.1822	7.7415	13.513	9.7272	9.7416	12.0962	10.7662	7.9502	8.7475	3.5212	2.6535	7.4237	8.5025	4.1178	9.4197	4.7832
5827	PXMP2	peroxisomal membrane protein 2, 22kDa	0.0782	0.2058	0	0.1515	0.1078	0.9397	0	0.0138	0	0.4518	0	0.4105	0	0.2369	0	0.0268	0	0	0.1005	0.0198	0.1037	0.8134	0	0.6351	0.1486	0.4917	0	0.1889	0	0.2375	0.0076	0.2057	0	0.254	0.2275	0.2407	0	0.1207	0.0098	0.1337	0.0995	0.1371	0	0.4395	0.1013	0.0901	0
28972	SPCS1	signal peptidase complex subunit 1 homolog (S. cerevisiae)	4.0044	0	2.022	1.017	0.2479	0	0	0	0	0	1.3442	0.2902	0	0	1.2808	0	2.379	0	0.4061	0	0.9909	0.6754	0	0.1542	0.4048	0.104	0	0	0	0.0955	0	0	0	0	0	0	0	0	0	0	0	0	0.8185	0	0	0	0
3068	HDGF	hepatoma-derived growth factor	12.0174	3.7961	3.8827	7.5589	4.3704	4.0595	30.3739	5.3098	4.4355	5.4642	8.951	8.9642	0.6645	4.0895	4.106	6.3957	4.8088	2.867	9.5444	2.67	9.122	11.347	3.6292	6.6312	9.0203	4.3521	4.3389	4.5822	4.3378	4.1867	10.1315	3.6814	4.1339	8.3075	6.7586	3.8388	4.6633	5.608	9.2857	4.1803	9.45	2.2379	20.3171	7.1636	8.5046	10.2785	13.0263
153364	MBLAC2	metallo-beta-lactamase domain containing 2	0.4826	0.2536	0.2126	0.342	0.7235	0.4229	0.123	0.4259	0.3512	0.4568	0.4389	0.4042	0.0149	0.1535	0.0257	0.5019	0.4742	0.0308	0.0089	0.045	0.5485	0.353	0.0948	0.3143	0.2269	0.2326	0.1544	0.466	0.2228	0.3225	0.2696	0.749	0.078	0.4201	0.6607	0.4845	0.235	0.3418	0.1671	0.1602	0.1393	0.0326	0.9555	0.4516	0.3508	0.3406	0.3033
23113	CUL9	cullin 9	0.0089	0	0	0	0.008	0.0125	0.0063	0.0429	0	0.0039	0.0224	0.0053	0	0.0014	0	0.0734	0.0017	0.033	0	0	0.0498	0.0123	0	0	0.0044	0.0067	0.0101	0.0026	0.0058	0.0058	0.0212	0	0	0.0092	0.005	0.0036	0.0037	0.0082	0	0.0029	0	0	0	0	0.0014	0	0
83706	FERMT3	fermitin family member 3	1.2059	0.2389	0.6197	0.4262	0.8978	0.144	0.7362	0.1003	4.3497	1.3125	1.1572	0.3462	0.2472	0.7096	0.3546	2.2181	4.7993	0.7775	0.7791	0.0964	1.2539	0.4874	0.5035	0.4106	0.556	0.3967	0.4279	0.2304	0.2643	0.0514	0.2142	0.1902	0.7665	0.2765	1.0865	0.0972	0.6352	0.223	0.7703	0.1713	5.3657	0.0623	0.4794	0.0959	0.9335	0.158	1.6297
53371	NUP54	nucleoporin 54kDa	0.3158	0.0512	4.265	0.2166	1.6935	0.3107	0.6748	0.183	0.2935	0.429	0.7354	0.6128	0.0108	0.2467	0.2394	0.0691	0.3974	0.1083	0.6281	0.2395	1.5811	0.4772	0.1632	0.0905	0.2236	0.2422	0.1975	0.3307	0.2446	0.3251	0.9845	0.1046	0.1771	0.3218	0.187	0.3091	0.3499	0.3425	0.2664	0.1995	0.3924	0	0.3199	0.1165	0.1998	0.2608	0.1381
3017	HIST1H2BD	histone cluster 1, H2bd	12.0876	15.7737	78.1522	35.5314	54.3685	142.796	23.2737	20.4213	78.7862	152.213	139.636	66.9957	4.3441	20.9941	48.9562	115.314	48.9942	29.9662	23.5366	6.6706	179.684	53.2106	69.5079	55.2069	89.5253	76.6166	109.549	62.5352	59.0034	88.0878	130.224	60.0953	40.3372	133.942	113.29	87.9068	80.8973	78.9784	135.278	72.1284	34.3232	3.0736	33.4804	47.4359	25.7936	149.933	14.8262
6809	STX3	syntaxin 3	1.8434	0.6377	0.6419	1.5878	0.5248	2.4364	0.3033	0.6636	0.5864	1.2413	0.1291	1.3021	0.0968	1.5722	0.2069	1.2071	0.1014	0.0489	0.0559	0.0111	0.1324	6.5938	0.0697	2.0831	0.1491	4.9862	3.3163	4.3673	0.137	2.0837	0.2147	6.3595	0.1056	3.7959	0.1862	2.9193	0.0839	1.4929	0.1493	1.9701	0.4348	0.4369	0.388	0.9568	0.2269	0.2605	0.1779
5588	PRKCQ	protein kinase C, theta	0.0105	0	0	0	0.1561	0	0	0.0645	0	0	0	0	0	0.034	0	0	0	0.0486	0	0.0064	0	0.0058	0	0	0	0	0	0.0186	0	0	0	0	0	0.0309	0	0	0	0	0	0	0	0	0	0	0	0.1178	0
1176	AP3S1	adaptor-related protein complex 3, sigma 1 subunit	3.4963	0.0929	0.7212	0.3284	2.6145	1.0999	1.3378	0.5536	1.4489	0.2564	4.0734	0.2691	0	0.2703	0.4078	0.1208	1.4141	0.0402	0.6082	0.1374	3.7851	3.2868	0.2735	3.2913	1.7644	2.7875	3.006	2.9809	2.9394	0.7486	0.5464	1.0387	0.3099	0.3335	1.5684	0.4753	0.4921	0.3947	0.2896	0.5394	0.4146	0.1686	2.466	0.0986	0.7122	3.1432	1.1407
4204	MECP2	methyl CpG binding protein 2 (Rett syndrome)	0.3774	0.2261	0.4933	2.1823	1.4908	0.6484	0.5378	1.0269	0.5429	0.9631	0.753	0.6755	0.0708	0.6022	1.4713	0.8586	0.3744	0.4481	0.832	0.274	1.8106	0.3349	0.318	0.3716	0.6044	0.3931	1.1283	0.8197	0.9489	0.6945	1.2738	0.5431	1.375	1.7709	0.9448	0.8241	0.6014	0.9906	1.6828	0.8231	2.2014	0.3305	1.1131	0.4174	0.2592	1.5096	0.2145
55240	STEAP3	STEAP family member 3, metalloreductase	0.3725	0.0359	0.0583	0.1876	0.1819	0.0894	1.1715	0.0487	0.1095	0.9016	0.3513	0.1644	0	0.0545	0	0.0917	0.0045	0.0044	0	0.012	0	0.014	0.0357	0.314	0	0.0228	0	0.0478	0	0.0453	0	0.037	0	0.038	0	0.1236	0	0.1658	0.0559	0.0074	0	0.0204	0.0511	0	0	0.1032	0
4354	MPP1	membrane protein, palmitoylated 1, 55kDa	1.7188	0.8131	0.4595	0.6449	0.5112	0.4593	0.6208	0.3051	0.9619	1.166	0.2679	0.6231	0.3546	0.6843	0.3617	0.7783	0.4871	0.3941	0.5745	0.5574	0.3058	1.1396	0.5577	0.7081	0.6041	0.8077	0.5108	0.2408	0.3138	0.7812	0.242	0.4736	0.4182	0.3855	0.2855	0.8301	0.3414	0.3689	0.337	0.4098	0.1142	0.0911	0.2619	0.5948	0.0892	0.3492	0.1419
23158	TBC1D9	TBC1 domain family, member 9 (with GRAM domain)	0.0229	0	0.0409	0.0106	0.045	0.0306	0.1248	0.012	0.0311	0.0262	0.0317	0	0.0008	0.0126	0.0051	0.0505	0.0992	0.0052	0.0335	0.0044	0.0169	0.0134	0	0.0082	0.0087	0.0066	0.0142	0	0.0202	0.018	0.0176	0.013	0.0154	0.0115	0.0214	0.0126	0.0156	0.0134	0.0147	0.0123	0.0206	0.0013	0.0575	0.013	0.0276	0.0129	0.0131
54732	TMED9	transmembrane emp24 protein transport domain containing 9	5.5269	1.2365	3.4634	1.4926	5.3659	2.4787	8.8481	1.4589	4.2056	2.2244	7.0237	2.3053	1.5675	1.2879	1.8102	2.1265	3.2718	0.8945	2.2821	1.5229	2.6487	1.9392	0.5071	1.3522	1.8033	1.7909	0.8567	2.1079	2.0812	2.8334	2.0926	3.1923	0.5273	1.8092	3.2185	2.045	2.0734	3.4066	1.9329	1.4554	4.4933	1.403	3.5779	1.5633	4.5668	1.2957	1.0684
79752	ZFAND1	zinc finger, AN1-type domain 1	0.2619	0	0.0567	0	0.0306	0	0.2106	0.1095	0.0192	0	0	0	0	0.0437	0	0.0593	0.1899	0.1023	0.1621	0	0.0504	0.0084	0	0	0.1144	0.0299	0.0406	0.0253	0.1446	0	0.0703	0	0.1119	0	0.2402	0	0	0.0085	0	0.0737	0.0266	0	0.0707	0	0.1001	0.0479	0.0355
284194	LGALS9B	lectin, galactoside-binding, soluble, 9B	0.1149	0.012	0.1974	0	0.712	0.0285	0.3015	0.0859	0.6361	0.1537	0.3547	0.078	0.0477	0.1929	0.1812	0	0.2258	0.0178	0.0771	0.0354	0.3695	0.0327	0.1097	0	0.161	0	0.1242	0.0138	0.1141	0	0.1305	0.0298	0.103	0.0149	0.255	0	0.1039	0	0.1013	0	0.3974	0	0.1213	0	0.3535	0.0498	0.2113
22930	RAB3GAP1	RAB3 GTPase activating protein subunit 1 (catalytic)	0.3387	1.1986	0.0621	0.0381	0.2021	0.115	0.1257	0.028	0.8362	1.2341	0.7654	0.6546	0.0017	1.1955	0.2873	0.1141	0.2806	0.0236	0.1283	0.0083	0.6012	1.0969	0.0995	0.0953	0.0554	0.0194	0.0642	0.0626	0.0924	0.1372	0.0686	0.1364	0.0279	0.1171	0.0587	0.1079	0.0581	0.1122	0.151	0.1345	0.0608	0.0155	0.1098	0.0215	0.0768	0.3642	0.2518
60682	SMAP1	small ArfGAP 1	0.1875	0.1606	0.312	0.1883	0	0.2585	0.2999	0	0.1608	0	0.1197	0.2276	0.0435	0.2615	0.2028	0.2673	0.2035	0.1014	0.1727	0.1577	0.17	0.2755	0.034	0.2115	0.1748	0.1094	0.2618	0.2411	0.156	0.3729	0	0.2542	0.0416	0.2611	0.0533	0	0.3018	0.3916	0.2151	0.1715	0.1654	0.1397	0.173	0.17	0.2003	0.1812	0.1484
84064	HDHD2	haloacid dehalogenase-like hydrolase domain containing 2	0.9463	1.9414	0.6019	3.0487	1.4973	3.2978	1.9782	3.4127	2.259	3.9727	3.8463	4.076	1.0844	4.486	0.3387	0.9407	0.3835	0.348	0.5663	0.5576	2.7051	4.3106	1.144	3.506	2.6123	1.5578	2.2841	3.273	2.8458	6.3643	8.4169	4.2614	0.3411	5.2523	4.2213	3.3531	4.001	4.5682	6.6572	3.0092	1.3475	0.2898	2.0787	3.0069	0.8184	3.7111	1.7564
4001	LMNB1	lamin B1	13.442	0.8623	19.502	2.3576	16.5107	1.8259	36.1832	2.5715	8.771	4.5955	12.9922	2.0748	0.8327	1.1318	13.3603	3.3335	13.819	0.6317	18.2503	0.6974	12.7408	2.4723	6.9661	2.4056	9.7987	1.3423	14.6192	3.3834	15.8514	2.5002	10.3333	3.0572	4.7741	2.9915	14.615	1.9782	5.4141	1.9269	4.7955	2.3162	18.9228	1.2683	33.1883	0.8316	12.1269	3.169	2.1457
9181	ARHGEF2	Rho/Rac guanine nucleotide exchange factor (GEF) 2	0.2827	0.0369	0.1643	0.0099	0.2092	0.023	0.1815	0.0607	0.1698	0.8652	0.139	0.1283	0.007	0.1089	0.1114	0.038	0	0.0206	0.0648	0.0354	0.3724	0.1279	0.2157	0.0964	0.6995	0.0353	0.0508	0.0155	0.0361	0.0079	0.1014	0.0104	0.0699	0.0482	0.1352	0.023	0.119	0.0125	0.1918	0.0638	0.1985	0	0.1553	0.0879	0.2675	0.0906	0.1289
6203	RPS9	ribosomal protein S9	11.8222	2.1841	9.1388	9.7918	9.3064	2.6397	18.0231	3.4759	4.6681	6.1641	22.9412	4.8721	0.957	3.0503	6.6437	5.4579	4.6583	2.2965	8.6967	1.0745	16.6277	5.062	6.2121	4.3911	12.7591	4.7097	6.6554	2.6137	3.9187	4.215	7.8882	1.3902	3.6329	4.5322	13.8054	3.5441	13.3979	2.8049	10.1324	2.4577	6.6812	0.9051	8.0343	5.5406	6.8294	1.8576	0.9856
217	ALDH2	aldehyde dehydrogenase 2 family (mitochondrial)	13.2688	170.21	12.0785	278.359	90.1387	418.33	26.0357	64.4229	6.4724	26.5753	35.3206	169.071	0.7761	80.1459	12.2221	213.137	27.6364	16.79	5.97	7.3209	15.6843	284.765	4.7608	266.919	22.1245	250.025	10.3838	239.329	2.6301	113.354	16.646	287.512	5.8393	84.654	14.9252	130.196	2.5797	128.198	12.7111	139.692	59.5069	118.928	32.4712	159.301	16.4516	103.793	5.318
4353	MPO	myeloperoxidase	0.1953	0.4918	0.3	0.0946	0.466	0.0728	0.2139	0.3153	0.2423	0.4129	0.6626	0.4322	0.0192	0.2155	0.5634	0.1534	0.1306	0.0457	0.7094	0.4281	1.2371	0.192	0.3117	0.0064	1.0672	0.1597	0.2272	0.0742	0.4229	0.0183	0.2064	0.1823	0.1615	0.0706	0.7199	0.0408	0.7507	0.2813	0.4173	0.2168	0.1952	0.1946	0.2058	0.023	0.9504	0.0166	0.2972
375790	AGRN	agrin	8.7764	3.222	9.6217	3.9023	6.8269	8.9781	12.6541	7.6723	12.0803	6.3327	3.2322	3.86	0.7792	4.7866	6.258	4.6089	2.9346	2.079	6.4318	3.8805	10.7681	4.6945	4.0888	3.3485	8.6782	2.8488	7.8682	7.2626	7.1003	7.4114	11.1445	5.7995	3.5721	7.3677	12.1411	3.7138	7.0438	5.3599	10.1618	6.8575	6.1524	3.2379	12.7802	3.6621	12.5913	12.0527	4.9838
10959	TMED2	transmembrane emp24 domain trafficking protein 2	2.1528	0.1214	3.2558	1.9678	2.9368	1.8896	9.8613	1.698	3.6526	1.6619	13.2216	1.8903	0.8861	2.6583	1.0554	2.0104	1.4205	0.5958	2.0619	0.672	4.906	2.1867	0.8936	2.6426	3.0447	1.2291	0.5497	1.014	1.8416	2.6051	0.6339	1.7166	1.4866	2.6372	2.7042	1.6086	2.2565	2.0934	1.0608	1.0088	1.6064	0.4135	0.8751	0.8634	0.471	2.2507	0.9327
6605	SMARCE1	SWI/SNF related, matrix associated, actin dependent regulator of chromatin, subfamily e, member 1	0.1083	0.0442	0.1232	0.1961	0.4175	0.1006	0.2616	0.6932	0.1594	0.1543	0.0867	0.1127	0.0656	0.2054	0.2617	0.1047	0.0654	0.2198	0.091	0.1005	0.1544	0.324	0.0714	0.038	0.2241	0.1065	0.0992	0.1753	0.1001	0.1014	0.1081	0	0.0738	0.2773	0.7406	0.3948	0.4389	0.3869	0.3782	0.1796	0.091	0.0024	0.2021	0.0819	0.2641	0.4336	0.2638
4289	MKLN1	muskelin 1, intracellular mediator containing kelch motifs	0.0666	0.1861	0	0.2841	0.0211	0.3057	0.0989	0	0	0	0.005	0.1644	0	0.0028	0	1.084	0	0.551	0.022	0.0637	0.0054	0.1558	0.0145	0.2435	0.0014	0.0895	0	0.1921	0.0198	0.3568	0	0.5273	0	0	0	0.065	0	0.1872	0	0.0067	1.7279	1.5263	0	0.271	0.1701	0.0027	0
9092	SART1	squamous cell carcinoma antigen recognized by T cells	0.22	0.4053	0.0581	0.1515	0.2861	0.1604	0.2125	0.759	0.3832	0.1209	0.0929	0.0208	0.0235	0.2881	0.1039	0.116	0.077	0.0121	0	0.0466	0.0672	0.2214	0.0648	0.0086	0.1681	0.3389	0.2075	0.126	0.1321	0.1133	0.1806	0.0982	0.1977	0.5217	0.3585	0.2099	0.3454	0.4701	0.2772	0.2552	0.2202	0.0211	0.3162	0.1015	0.0613	0.3169	0.1554
1968	EIF2S3	eukaryotic translation initiation factor 2, subunit 3 gamma, 52kDa	6.9823	1.1744	2.5745	2.5786	2.2196	2.0102	2.8795	1.9225	2.6304	1.9076	4.9904	3.2385	0.1788	1.8707	2.8819	2.4846	3.3988	1.0909	1.1336	0.4316	2.6071	3.6129	0.4963	1.8143	1.4264	1.4494	1.1211	1.1858	1.0752	2.0892	1.1746	1.0124	0.7135	1.6415	1.1416	1.6802	0.6971	1.4177	1.1838	1.3011	4.21	0.9013	2.8187	1	1.4081	1.6834	1.7921
54437	SEMA5B	sema domain, seven thrombospondin repeats (type 1 and type 1-like), transmembrane domain (TM) and short cytoplasmic domain, (semaphorin) 5B	0.0542	0	0.0523	0	0.1108	0	0.4583	0	0.0876	0	0.0202	0	0	0	0.0199	0	0.0477	0	0.0343	0	0.1021	0	0.0112	0	0	0	0.0508	0	0.0189	0	0.0932	0	0.0034	0	0.0652	0	0.0605	0	0.1051	0	0.0062	0	0.0128	0.0735	0	0	0.0879
166785	MMAA	methylmalonic aciduria (cobalamin deficiency) cblA type	0.596	0.7685	0.0793	2.3863	0.7045	0.8379	0.0367	0.5352	0.2498	1.0142	0.299	0.7819	0.0686	1.1538	1.7591	2.3198	0.6378	0.3189	0.8159	0.1132	1.2823	2.2691	0.5621	2.5862	1.078	1.9056	0.2096	0.3841	0.2103	2.2161	0.0465	0.944	0.1667	1.0011	0.2652	0.9639	0.1256	1.1158	0.3584	0.4802	1.3753	0.1356	0.6951	0.9277	0.9666	0.5586	0.084
55177	RMDN3	regulator of microtubule dynamics 3	0.9835	0.5611	2.1615	1.1488	3.6134	1.0136	0.9651	0.7853	3.3572	1.2654	1.2978	1.3224	0.2017	1.2077	1.1149	1.1509	0.4922	0.3007	1.0305	0.3271	1.3753	1.4032	0.1764	0.56	0.3513	0.5235	1.2764	1.2026	0.9352	1.4733	1.4377	0.9237	0.6953	1.2803	2.0979	1.0227	2.2731	1.5849	1.3441	1.0861	0.7058	0.8579	1.0698	0.9703	1.456	1.2722	0.538
10061	ABCF2	ATP-binding cassette, sub-family F (GCN20), member 2	0.1369	0.4697	0.043	4.4316	8.6119	9.5979	0.2162	0.2202	3.0268	2.2399	0.1846	3.1621	0.0078	1.4332	1.8941	0.9039	0.0368	0.0233	1.3846	0.5458	4.3489	0.6485	0.4343	1.0009	0.4076	0.6879	0.002	0.0801	0.0862	0.1151	0.0979	0.077	0.0914	0.1233	0.1781	0.1102	0.27	0.0948	5.0524	0.0761	11.0196	0.0575	0.0799	0.0405	0.0801	3.4748	0.0111
54467	ANKIB1	ankyrin repeat and IBR domain containing 1	0.036	0.0124	0	0.011	0	0.0285	0	0.0315	0.0272	0.0609	0	0.0072	0	0.0141	0.0051	0.0181	0.2176	0	0	0	1.9964	0.0153	0	0.1325	1.455	0.0841	0	0.0048	0	0	0.0037	0.0128	0	0.0068	0.0099	0.0668	0.0034	0.0966	0	0.009	0.0308	0.0073	0.0025	0.0042	0.0216	0	0.0029
9936	CD302	CD302 molecule	0.031	0	0.0084	0	0	0.0137	0.0247	0	0.0252	0.0568	0.0192	0	0	0	0.1747	0.0279	0.0139	0.0061	0	0	0.0085	0	0	0	0	0	0	0	0	0	0	0	0	0	0	0	0	0	0	0	0	0	0	0	0.0327	0	0
9026	HIP1R	huntingtin interacting protein 1 related	0.8428	0.2921	0.3168	1.0726	0.4686	1.4763	0.5336	0.7016	0.661	1.7364	0.3658	1.348	0.0475	1.4591	0.3414	0.6667	0.3257	0.2081	0.1374	0.1848	0.4246	0.9322	0.0539	0.7125	0.2864	0.5663	0.1612	0.7699	0.2959	2.267	0.3905	1.2577	0.1311	0.9203	0.2123	0.8158	0.2768	1.3449	0.4015	0.7056	0.2712	0.9919	0.3485	1.3133	0.1293	0.7839	0.1774
871	SERPINH1	serpin peptidase inhibitor, clade H (heat shock protein 47), member 1, (collagen binding protein 1)	27.21	4.3615	44.8829	7.2896	34.5029	5.2157	45.2396	6.0628	61.4854	22.1577	40.2345	8.3126	3.6197	8.605	30.7703	9.5276	14.8039	1.8946	26.6877	2.1133	34.586	10.1674	15.3336	8.6457	26.3957	5.5011	23.673	3.8465	15.6879	5.3375	23.4695	4.486	6.1666	7.0556	22.6468	6.9638	24.0116	6.7062	23.4983	5.3367	15.6527	2.0988	39.9146	6.992	11.981	7.9436	7.3981
57826	RAP2C	RAP2C, member of RAS oncogene family	0.2544	0.1332	0.3639	0.108	0.5476	0.1142	0.3004	0.1357	0.6657	0.2842	0.7844	0.1176	0.087	0.1384	0.2798	0.1807	0.2704	0.0629	0.2186	0.0185	0.2967	0.2461	0.157	0.172	0.1917	0.1476	0.2891	0.0978	0.179	0.1548	0.1523	0.0946	0.1888	0.2264	0.2656	0.1893	0.1551	0.0998	0.2192	0.1798	0.2281	0.1144	0.1954	0.0944	0.3752	5.5563	2.663
84267	C9orf64	chromosome 9 open reading frame 64	1.4813	0.1097	1.9153	0.4115	3.443	0.9502	1.4066	0.3031	1.2335	0.9729	2.2868	0.9974	0.1418	0.2225	0.625	2.1579	0.8845	0.2706	2.5457	0.3203	1.5535	0.3869	0.3623	1.8198	1.4764	0.4588	1.1718	0.4273	1.0308	0.9347	1.6929	1.1629	0.6668	0.8454	2.1937	0.5532	0.763	0.7023	1.292	0.3241	0.9977	0.2904	6.461	0.5149	2.2553	0.5731	0.9029
7739	ZNF185	zinc finger protein 185 (LIM domain)	0.2115	0.0336	0.0181	0.2872	0	0.1538	0.0261	0.0841	0.0871	0.0783	0	0.0088	0	0.0761	0.0218	0.1176	0.0471	0.0067	0.0118	0.0379	0.0154	0.0057	0	0.1059	0	0.0555	0.1056	0.1222	0.0154	0.0892	0.2821	0.0907	0.113	0.2107	0	0.0319	0.0533	0.1314	0.0852	0.096	0.0532	0.0258	0.0942	0.0092	0	0.0344	0.0131
51651	PTRH2	peptidyl-tRNA hydrolase 2	0.3139	0.2932	0.0767	0.2662	0.2425	0.3883	0.3374	0.3216	1.0348	0.5812	6.8642	0.3464	0.0643	0.5372	0.1176	0.3098	1.8595	0.1377	1.5529	0.0239	0.2004	0.5221	0.038	0.1512	0.1963	0.1169	0.1288	0.1523	0.0832	0.2657	0.107	0.1911	0.0505	0.4723	0.1698	0.2677	0.1271	0.3456	0.27	0.2735	0.1298	0.0481	0.222	0.2554	0.0658	0.3622	0.0321
10873	ME3	malic enzyme 3, NADP(+)-dependent, mitochondrial	0.1136	2.5124	0.1223	0.6239	0.7047	0.9814	0.0944	0.5979	0.4348	0.2474	0.2218	0.2669	0.004	0.4695	0.0512	0.8775	0.128	0.1555	0.0124	4.774	0.0184	0.3844	0.002	0.3766	0.0215	2.5525	0.048	0.532	0.128	0.4529	0.0626	0.6234	0.0405	0.8289	0.1215	0.4435	0.0277	0.7124	0.296	0.5036	0.1245	1.7347	0.0464	0.254	0.0042	0.6478	0.0553
57026	PDXP	pyridoxal (pyridoxine, vitamin B6) phosphatase	0.6712	1.2794	0.1495	4.5388	0.4017	0.6903	0.586	0.0701	0.192	0.7535	2.6276	4.0365	0.58	4.0141	4.0315	5.6448	2.622	2.4153	0.2864	0.2845	8.5875	2.875	1.8535	3.5831	0.2591	1.6737	3.5541	0.476	2.1583	2.6365	1.7317	0.3013	0.257	1.7605	1.7887	1.8718	0.4592	2.0537	1.2256	1.8718	0.2186	0.1992	0.7721	0.5656	0.6821	0.7476	0.1451
645402	USP17L4	ubiquitin specific peptidase 17-like family member 4	0.0048	0	0	0	0	0	0	0	0	0	0	0	0	0	0	0	0	0	0	0	0	0	0	0	0	0	0	0	0	0	0	0	0	0	0	0	0	0	0	0	0	0	0	0	0	0	0
5257	PHKB	phosphorylase kinase, beta	0.8716	0.0763	0.3484	0.928	0.4356	0.1115	5.4838	0.067	0.3003	0.3649	5.0091	0.5728	0.0373	0.5118	0.2178	0.2909	0.1121	0.0538	0.1629	0.0107	0.4658	1.2245	0.0696	0.053	0.3295	0.0758	0.2209	0.053	0.2307	0.162	0.3996	0.1252	0.1023	0.1285	0.674	0.1096	0.3187	0.0883	0.5892	0.0685	0.6057	0.1368	0.5054	0.7908	0.888	0.0779	0.2767
836841	HEC1	transcription factor HEC1	0.0409	0.0012	0.0404	0	0.1323	0	0.1028	0.0011	0.0598	0	0.09	0.0043	0.0013	0.001	0.0212	0.0006	0.0365	0	0.0048	0.0018	0.012	0.0016	0.0004	0.0008	0.0084	0	0.0079	0	0.1426	0	0.0766	0	0.009	0.0043	0.0732	0	0.015	0	0.0212	0.0161	0.1266	0.001	0.0285	0.0012	0.0762	0.0008	0.0315
79814	AGMAT	agmatine ureohydrolase (agmatinase)	0.4698	86.7512	0.808	78.6057	2.5844	93.2176	3.6179	33.5038	2.1287	40.3725	1.0349	21.8843	0.1908	108.246	2.8391	182.302	3.8702	0.8237	1.535	0.5754	1.8888	96.0744	1.0313	91.4388	1.9267	168.237	0.553	81.1257	2.1792	190.944	4.3117	301.805	0.8991	27.8376	3.4852	64.3166	0.975	171.556	3.737	20.319	9.2202	61.0641	3.1008	141.824	1.2036	19.1134	0.3349
23637	RABGAP1	RAB GTPase activating protein 1	0.0604	0.043	0.0362	0.0523	0.0434	0.413	0.0145	0.0791	0.0192	0.2093	0.059	0.141	0.0011	0.0877	0.0511	0.0577	0.0323	0.013	0.0047	0.005	0.1304	0.0881	0.0035	0.0847	0.0501	0.0342	0.0321	0.0985	0.0207	0.1249	0.0783	0.2504	0.0149	0.113	0.0533	0.1922	0.0426	0.1241	0.0563	0.0621	0.0251	0.0734	0.0455	0.1306	0.1052	0.0956	0.0504
5284	PIGR	polymeric immunoglobulin receptor	0.0605	1.1765	0	1.5231	0	0.6741	0	0.2779	0	2.5963	0	0.9844	0.1616	1.5512	2.5148	8.6489	0.1684	1.7912	0.0364	0.33	0	1.5271	0	0.8897	0.2666	1.4478	0	0.5752	0	1.5491	0	0.8317	0.2265	5.705	0	0.2948	0	1.0122	0	2.4781	0	0.6925	0	0.5983	0.2119	0.9829	0.5976
2548	GAA	glucosidase, alpha; acid	2.0356	0.4791	1.4257	1.6224	1.5	0.851	3.2977	2.3755	3.1853	1.1168	5.5142	2.133	0.1032	1.1404	1.2809	2.0481	1.721	1.3631	0.2605	0.4428	1.4385	2.5697	0.4184	1.3969	1.5934	0.7237	0.4628	0.8485	0.323	0.6451	0.8903	0.7956	0.4767	1.2942	1.4446	1.1232	0.4517	0.5694	1.739	1.0368	1.5578	1.5635	3.1176	1.3327	3.3222	3.2474	1.1171
259307	IL4I1	interleukin 4 induced 1	0.0794	0	0.0728	0	0.2226	0	0.0585	0	0.2385	0	0.2736	0	0.0156	0	0.0364	0	0.0152	0	0	0.0136	0.0051	0	0	0.0179	0.175	0	0.0055	0.0041	0.011	0	0.0153	0	0.0299	0.0036	0.0817	0	0.0196	0	0.0414	0.0036	0.0145	0	0.037	0	0.8677	0	0.0288
1806	DPYD	dihydropyrimidine dehydrogenase	0.0887	0.0605	0.017	0.1611	0.3195	1.0056	0.0286	0.2776	0.2164	0.3808	0.2209	0.0761	0	0.1235	0.0192	0.3418	0.0187	0.091	0.0157	0.012	0.0237	0.1916	0	0.0449	0.0193	0.1067	0.0043	0.0606	0.0053	0.781	0.0484	0.8311	0.0119	0.6572	0.0119	0.6077	0.0242	0.3918	0.0964	0.0505	0	0	0.0145	0.1217	0.1166	0.2584	0.1286
53917	RAB24	RAB24, member RAS oncogene family	1.9176	1.7711	0.3156	0.908	0.0759	0.838	1.4051	0.5519	0.4053	0.8418	1.57	0.3922	0.3748	0.7762	1.0084	0.8613	0.3162	0.0975	0.2431	0.0106	0.2905	0.6501	0.0405	3.1027	0.1055	0.2146	0.0749	1.8274	0.0899	0.5056	0.213	0.7447	0.2234	0.1245	0.2979	0.0827	0.1891	0.5209	0.5776	0.1598	1.5238	0.2433	1.3383	0.345	0.6584	0.4181	109.53
55052	MRPL20	mitochondrial ribosomal protein L20	0.3742	0.3647	0	0.0444	0.1963	0.44	0.1676	1.8838	0.2442	0	0.2671	0.8839	0.0122	0.9291	0	1.3911	0.1662	1.3512	0.1272	0.229	0.1607	0.6732	0.0327	0.6312	0.1957	0.3505	0.0163	0.554	0.106	0.5884	0.1635	0.4253	0.0385	0.588	0.0151	0.2829	0	0.7521	0.1701	0.444	0.2204	0.0859	0.2539	0.5248	0.0174	0	0
143872	ARHGAP42	Rho GTPase activating protein 42	0	0	0.0023	0	0	0	0.0351	0.0121	0.0273	0	0	0.0021	0.003	0.0287	0.0396	0.0238	0	0	0.0011	0.023	0.0072	0	0	0	0.0301	0	0	0	0	0	0	0	0	0	0.0347	0	0.0185	0	0.0853	0	0	0	0.0449	0.0257	0.0427	0	0
55759	WDR12	WD repeat domain 12	0.3449	0.0558	1.0026	0.1238	0.7115	0.1936	1.1371	0.5104	1.0951	0.1337	0.5236	0.1833	0.0103	0.412	0.2642	0.0399	0.0942	0.0387	0.0697	0.0105	0.4278	0.0143	0.096	0.0564	0.2565	0.1539	0.1628	0.3347	0.2628	0.0489	0.5367	0.1147	0.1027	0.3005	0.4533	0.1268	1.0943	0.2324	0.8332	0.3286	0.2717	0.0673	1.2505	0.0289	0.2971	0.0616	0.0703
506	ATP5B	ATP synthase, H+ transporting, mitochondrial F1 complex, beta polypeptide	66.6484	585.619	209.385	966.013	405.534	1036.4	294.211	1073.96	387.159	900.091	547.353	996.946	41.0796	1076.75	196.945	1514.53	199.58	575.193	86.4131	283.224	152.421	884.13	54.1669	840.775	123.857	526.341	93.7274	706.697	117.429	1088.35	131.981	756.707	75.3148	836.981	194.643	700.979	57.5561	1068.58	184.19	603.414	397.349	295.69	298.092	886.177	140.986	1188.37	80.635
56996	SLC12A9	solute carrier family 12, member 9	0.3347	0.1829	0.3586	0.155	0.3863	0.1791	0.1679	0.0739	0.5215	0.25	0.1401	0.1375	0.0155	0.2341	0.1316	0.4076	0.1227	0.1869	0.0585	0	0.1803	0.5599	0.0759	0.2747	0.1893	0.1301	0.1016	0.1637	0.9463	0.2552	0.1457	0.1853	0.08	0.1516	0.2279	0.1854	0.1353	0.2344	0.1058	0.1676	0.2504	0.1252	0.1172	0.1372	0.5104	0.0288	0.211
3827	KNG1	kininogen 1	5.3873	7.1824	7.0016	5.591	3.2405	5.2562	3.2879	8.714	2.5146	2.1877	0.8876	4.7511	2.0984	7.3408	3.5205	2.8567	7.7052	2.2765	5.2994	5.5921	10.7868	8.6044	2.5424	2.5843	5.2009	3.1239	12.7351	7.2416	4.7918	3.2884	8.3935	15.8217	2.6807	4.5338	6.1055	7.3885	4.5319	6.3194	2.9838	9.9362	7.7436	4.611	7.4094	5.7783	6.317	2.8852	4.6004
6844	VAMP2	vesicle-associated membrane protein 2 (synaptobrevin 2)	3.7577	0.4026	2.1567	1.7424	2.8534	3.6493	4.8477	5.6793	3.457	3.8021	0.1076	3.9651	1.2343	5.0193	2.3084	2.2544	2.5573	0.8368	1.0684	0.27	2.6719	3.9811	0.2565	1.9982	0.873	0.3307	2.5262	3.0343	2.7682	5.7825	3.0323	4.3271	1.4959	4.5816	3.0331	1.751	1.8365	3.0615	2.0665	4.0228	3.6705	2.1089	5.1207	0.5897	5.2807	4.1929	3.4157
8560	DEGS1	delta(4)-desaturase, sphingolipid 1	0.7006	0.0076	2.1657	0	0.4216	0	0.7106	0.0135	0.5667	0.0391	0.5518	0	0.0501	0.0218	0.275	0.0238	0.125	0.0044	0.2208	0.0023	0.4579	0.124	0.041	0.0645	0.1024	0	0.145	0	0.1301	0.0948	0.2064	0.088	0.0253	0.0563	0.2146	0.0363	0.0395	0.0191	0.2567	0	0.0486	0.0096	0.2449	0.0157	0.407	0.0684	0.7951
10184	LHFPL2	lipoma HMGIC fusion partner-like 2	0.0416	0	0	0	0	0	0	0	0.0961	0.0967	0	0	0	0	0.0329	0	0	0.0121	0	0	0	0	0.005	0	0	0	0	0	0.0262	0	0	0	0.0332	0	0.0257	0	0	0	0.0425	0	0	0.0307	0.026	0	0.0747	0.05	0
9238	TBRG4	transforming growth factor beta regulator 4	0.0709	2.3683	0.0491	1.6075	0.4352	1.8177	0.3361	0.4278	0.2542	0.841	0.927	0.7855	0.0662	0.88	0.0802	3.0211	0.0942	0.2396	0.0176	0.2031	0.0801	3.8816	0.0207	1.2463	0.0268	1.7883	0.012	0.5114	0.1549	3.5965	0.0917	0.5032	0.0491	0.4882	0.6134	0.4826	0.0295	0.5821	0.3205	0.3821	0.4561	1.9059	0.7268	0.7347	0.2446	1.4446	0.0884
8725	URI1	URI1, prefoldin-like chaperone	0.4613	0.597	0.0251	0.0376	0.0096	0.0398	1.2228	0	1.7682	0	1.0401	0.0494	0	1.004	0.0752	0	0	0.0202	0.0161	0.0142	0.068	0.0147	0	0.0243	0.0738	0	0.0136	0.0187	0.0107	0.0184	0.0257	0.0395	0	0	0	0.0597	0	0.9147	0	0	0	0	0	0.0205	0.396	0.0191	0.03
10204	NUTF2	nuclear transport factor 2	5.2775	5.1389	4.0013	4.6885	17.3932	3.0827	8.0347	9.0726	13.1016	12.8568	22.5664	10.1338	2.5531	8.9675	4.1902	6.7692	2.9902	2.3861	2.1497	2.1629	8.1614	11.1222	1.4059	5.7258	6.9366	5.3067	6.7295	3.904	3.8078	13.7391	9.7903	4.6545	5.0241	16.8128	10.0537	11.5244	10.6917	10.8832	9.7588	8.4757	4.0688	1.5238	8.1236	4.1075	5.2012	13.2884	7.7069
25844	YIPF3	Yip1 domain family, member 3	0.0998	0.1054	0.0638	0	0.0559	0.143	0.1786	0.1168	0.1109	0.2169	0.2709	0.3209	0.0305	0.175	0.0269	0.0941	0.0381	0.0668	0.0341	0.0678	0.038	0.2901	0.0064	0.0634	0.0967	0.0879	0.014	0.0763	0.022	0.0853	0.0643	0.2501	0.0415	0.0372	0.0401	0.1478	0.0167	0.1487	0.0315	0.1213	0.063	0.089	0.1434	0	0.0761	0.2528	0.0557
9361	LONP1	lon peptidase 1, mitochondrial	2.3207	7.6335	3.196	9.3905	14.7069	11.6176	7.6949	6.1257	21.4755	9.7591	11.8734	9.7555	0.601	12.6907	1.5959	10.2408	3.2227	2.3746	1.5359	1.3208	1.4872	9.1607	0.5165	10.6487	1.5961	9.1483	2.0355	12.5453	4.332	18.8858	4.5841	15.8	1.5125	7.8248	7.8761	10.293	1.6959	11.0488	4.691	5.0776	4.9656	3.7721	8.4635	10.0306	2.5322	6.6391	1.6002
2011	MARK2	MAP/microtubule affinity-regulating kinase 2	0.3568	0.1389	0.8046	0.9792	0.0711	0.0816	0.057	0.0153	0.1385	0.0195	0.0153	0.0808	0.0029	0.0502	0.0616	0.0149	0.0168	0.0216	2.5535	0.1259	0.0313	0.1263	0.0044	0.1163	0.014	0.0874	0.0495	0.2146	0.1958	0.0715	0.0702	0	0.0584	0.0766	0.0184	0.0025	0.1472	0.0654	0.0791	0.0894	0.0346	0.0996	0.0677	0.0013	0.075	0.1287	0.0298
11261	CHP1	calcineurin-like EF-hand protein 1	0.0875	2.6533	0.3877	4.3017	0.92	6.8428	0.2893	2.6807	0.584	2.0223	0.6703	8.0816	0.1914	4.1288	2.9442	1.0725	1.4726	0.3518	0.0252	0.2444	0.7898	2.8217	0.2072	2.5526	0.4876	2.7317	0.2568	5.728	0.3406	2.2795	0.7425	10.4693	0.7438	1.3749	5.8001	3.6915	0.1903	9.3727	0.6343	3.6219	0.9191	3.4046	0.2222	3.5714	0.2267	0.9588	0.1191
5817	PVR	poliovirus receptor	0.0779	0	0.3963	0.0748	0.0608	0.1371	0.1214	0	0.1194	0	0.6626	0	0	0.08	0.2715	0.2459	0.1059	0.2386	0.1282	0	0.2327	0.3587	0.0048	0	0.0286	0	0	0	0	0	0	0	0	0	0.0198	0	0	0	0	0	0.1571	0.1112	0.0642	0.0458	0.0253	0.0388	0
54951	COMMD8	COMM domain containing 8	0.5249	0.61	0.3133	0.7042	0.6035	0.8632	0.3236	0.6191	0.8507	1.7913	0.5495	0.7524	0.0592	0.6202	0.1652	0.154	0.0137	0.0264	0.0684	0.0334	0.5766	1.3077	0.1468	0.7867	0.3747	1.0452	0.2432	0.6556	0.2883	1.0603	0.5527	0.9691	0.3487	1.1206	0.2922	1.1622	0.6223	1.3692	0.6149	0.8245	0.4023	0.2809	0.1536	0.3854	3.0531	0.3009	0.4643
64769	MEAF6	MYST/Esa1-associated factor 6	0.459	0.0779	0.2426	0.0242	0	0	0.0712	0	0	0	0.1696	0	0	0	0.0318	0	0	0	0.1083	0.0409	0.1327	0	0.1497	0	0	0	0	0	0.0735	0.1454	0.4705	0	0.0236	0.0248	0.3461	0	0.4413	0	0.166	0	0.0597	0	0.0431	0	0.0256	0	0
11222	MRPL3	mitochondrial ribosomal protein L3	0.0718	0.156	0.0501	0.0818	0.1126	0.0578	0.0784	0.6919	0.2503	0.4046	0.2447	0.5495	0.0157	0.5885	0.2689	0.6761	0.0376	0.2766	0.0881	0.0143	0.0935	0.5156	0.0228	0.3249	0.0243	0.1409	0	0.035	0.0089	0.3488	0.0262	0.0423	0	0.3041	0.0346	0.2122	0.0125	0.2258	0.0235	0.1459	0.0873	0.0706	0.1689	0.3594	0	0.2419	0
60496	AASDHPPT	aminoadipate-semialdehyde dehydrogenase-phosphopantetheinyl transferase	1.1409	0.1734	0.0868	0.1354	0.8119	0.12	0.5645	0.2362	0.9772	0.876	0.5546	0.5878	0.051	0.3915	0.55	3.4584	0.4008	0.0578	0.1009	0.0479	0.1457	0.7013	0.0166	0.5007	0.103	0.1328	0.0977	0.1502	0.138	0.7382	1.5806	0.2632	0.1196	0.7255	1.6565	0.4796	0.3841	0.2582	0.5962	0.1043	0.2855	0.0102	0.7147	0.2908	0.2281	0.3943	0.0589
51295	ECSIT	ECSIT signalling integrator	0.028	0.7865	0.0555	0.9273	0.832	0.6368	1.5011	0.7349	0.3136	0.6116	1.625	1.4447	0	0.9102	0	0.3078	0	0.0406	0	0.0221	1.1774	0.2448	0.0025	0.6349	0.3494	0.554	0	0.2533	0.0079	0.7798	0.2298	0.3224	0.0167	1.0123	0.5687	0.4578	0.0207	0.3678	0.0412	0.2623	0.0674	0.4241	1.1531	0.6314	0.0302	1.2069	0
4689	NCF4	neutrophil cytosolic factor 4, 40kDa	0.023	0	0.031	0	0.3526	0	0.535	0	0.3213	0.213	0.0401	0.2103	0	0.0711	0.1823	0	0.1591	0	0.0262	0	0.0107	0	0.0063	0	0.0882	0	0	0	0	0	0.0112	0	0.2355	0.0101	0.0684	0	0.0354	0	0.0343	0	0.0117	0	0	0	0.0981	0	0.4352
54914	FOCAD	focadhesin	0.0071	0	0.0271	0	0.0259	0	0.0169	0.0056	0.0166	0.0172	0.4244	0.0415	0.0219	0	0.0045	0	0.0049	0	0.0421	0	0.0225	0	0.0125	0	0.0388	0	0.0041	0	0.0064	0	0.0055	0	0.0019	0.0066	0.0062	0.0039	0.0838	0	0.0182	0	0.0471	0	0.002	0	0	0	0.0083
387680	FAM21A	family with sequence similarity 21, member A	0.1927	0.0268	0.0183	0.1193	0.0624	0.0441	0.1275	0.0246	0.039	0.2009	0.0053	0.0354	0.0106	0.1179	0.0325	0.0359	0.1125	0.0089	0.0135	0.0082	0.0467	0.0922	0.01	0.1388	0.0188	0.0532	0.0203	0.0956	0.0499	0.0529	0.0595	0.0722	0.0117	0.0588	0.0796	0.0827	0.0375	0.0835	0.0437	0.0337	0.0826	0.1226	0.1618	0.078	0.1019	0.0992	0.0412
90957	DHX57	DEAH (Asp-Glu-Ala-Asp/His) box polypeptide 57	0.1279	0.0024	0.0067	0.0038	0.0062	0.0092	0.0533	0.0517	0.0246	0.0327	0.0036	0	0	0.0044	0.0015	0	0.0012	0	0	0	0.0056	0.0095	0.0007	0.0078	0	0.0033	0	0	0.0022	0	0	0	0.0023	0.0122	0.0239	0.0039	0.001	0	0.1578	0.0012	0.0412	0	0.0036	0.0012	0.0549	0	0.0143
60490	PPCDC	phosphopantothenoylcysteine decarboxylase	1.7215	0	0.0168	0	0	0.0574	0.0579	0.035	0.115	0.3495	0.0208	0.1828	0.122	0.0816	0.0546	0.1438	0.0337	0.0295	0	0.0691	0.1837	0.032	0.0245	0	0.0505	0.1354	0.0804	0.0189	0	0	0.0992	0	0	0.1151	0.0897	0.0228	0.0975	0.0181	0.211	0.0129	0.0927	0.0231	0	0.0365	0.0214	0.0112	0
4150	MAZ	MYC-associated zinc finger protein (purine-binding transcription factor)	0	0	0	0	0.0395	0.0122	0.0418	0	0	0	0	0.0153	0	0	0.1552	0	0.0305	0	0.0519	0	0.0382	0	0.0382	0	0.0118	0	0	0	0.0123	0	0.0263	0	0.0057	0.007	0.0127	0	0.0047	0	0	0	0.0313	0	0.0141	0	0.0309	0	0
23398	PPWD1	peptidylprolyl isomerase domain and WD repeat containing 1	0.4103	0.01	0.0769	0.0126	0.1464	0.1156	0.2301	0.0752	0.1234	0.0734	0.1335	0.0668	0.0094	0.0651	0.1933	0.1576	0.1174	0.0531	0.0401	0.0109	0.0919	0.06	0.0345	0.0173	0.0622	0.0212	0.0428	0.0258	0.0788	0.0531	0.0802	0	0.0091	0.0809	0.2916	0.177	0.1477	0.0294	0.1461	0	0.1709	0	0.136	0.0548	0.0996	0.0752	0.0608
114885	OSBPL11	oxysterol binding protein-like 11	0.0207	0.0496	0.0278	0.0211	0.1006	0.0818	0.1409	0.0511	0.0833	0.1332	0.0927	0.2158	0	0.0735	0.0063	0.0696	0.0047	0.002	0	0	0.0996	0.0659	0.0024	0.0356	0.0277	0.0326	0.0079	0.0528	0.0231	0.0675	0.0491	0.0339	0.0823	0.0433	0.1249	0.2362	0.0515	0.5715	0.0694	0.0791	0.0729	0.0209	0.0502	0.0552	0.041	0.0395	0.0265
2794	GNL1	guanine nucleotide binding protein-like 1	1.0881	0.5601	0.0815	0.5334	0.5313	2.5717	6.0508	0.1193	0.2741	0.3629	5.3626	0.3251	1.2816	4.4753	2.8878	0.2288	12.9243	1.415	3.3881	0.4942	6.183	9.9345	0.3416	6.8126	3.0854	2.7124	7.0053	0.8418	0.3006	0.1944	3.7849	0.184	0.8533	4.8361	3.2922	3.2671	1.8459	2.0468	0.7089	4.8988	9.4951	2.2723	4.8115	3.8113	4.4077	9.3768	0.0861
26953	RANBP6	RAN binding protein 6	0.0156	0.0125	0.0346	0.0079	0.1657	0.0435	0.1945	0.0703	0.0965	0.0428	0.1025	0.0309	0	0.0259	0.0106	0.037	0.0436	0.0059	0.0146	0.0014	0.122	0.0506	0.0032	0.0372	0.0083	0.0227	0.0125	0.0615	0.0336	0.0562	0.0936	0.3519	0.0061	0.0314	0.0816	0.0116	0.0652	0.0552	0.0489	0.0535	0.0273	0.0075	0.1914	0.044	0.1161	0.121	0.002
731	C8A	complement component 8, alpha polypeptide	0.4062	0.5409	0.6069	0.8878	0.2521	0.8671	0.5362	0.927	1.276	0.2783	0.0815	0.3313	0.1958	0.5106	0.1697	0.2872	0.5468	0.1998	0.5707	0.2927	0.2085	1.5401	0.2407	0.571	1.4051	0.2878	0.6827	0.7209	0.498	0.4546	0.5561	1.5239	0.3719	1.0266	0.7374	0.8018	0.2336	0.7767	0.2595	0.7363	0.1796	0.4783	0.0749	0.2267	0.654	0.4099	0.3202
55226	NAT10	N-acetyltransferase 10 (GCN5-related)	0.2874	0.0274	1.2313	0	0.6988	0.2602	0.1694	0.0411	0.5218	0.5246	1.5824	0.0937	0.0127	0.0234	0.1278	0.0406	0.5124	0.0312	0.8129	0.0043	0.325	0.0982	0.0598	0.1133	1.3679	0.0311	0.9652	0.2301	0.7029	0.2222	0.2236	0.017	0.2901	0.3559	0.5195	0.1967	0.0623	0.392	0.3353	0.476	0.1519	0.0087	3.0007	0.0132	0.0748	0.0898	0.6487
91010	FMNL3	formin-like 3	0.0222	0.0101	0.1332	0.0097	0.1228	0.03	0.0351	0.3903	0.1445	0.2329	0.1167	0.0193	0.0123	0.0244	0.2871	0.0312	0.1027	0.0304	0.0474	0.0189	0.4286	0.033	0.0927	0.3069	0.0782	0.1822	0.0859	0.1049	0.0584	0.0353	0.155	0.019	0.021	0.1314	0.1165	0.0111	0.0504	0.0569	0.0862	0.0594	0.0813	0.0036	0.1272	0.0091	0.1349	0.0964	0.0427
2009	EML1	echinoderm microtubule associated protein like 1	0.2337	0.0831	0.1775	0.1821	0.1957	0.3864	0.209	0.1378	0.0944	0.2841	0.0709	0.1104	0.0401	0.1263	0.6808	0.1979	0.0936	0.0988	0.1128	0.0128	0.2369	0.1056	0.1429	0.0997	0.4817	0.0434	0.167	0.1225	0.2297	0.2974	0.2622	0.2609	0.0649	0.2923	0.432	0.1319	0.2213	0.2258	0.3841	0.0558	0.088	0.1319	0.336	0.1235	0.1812	0.1022	0.1482
64207	IRF2BPL	interferon regulatory factor 2 binding protein-like	0.3783	0.0099	0.0043	0.0106	0.0232	0.0329	0.2029	0.0703	0	0.0525	0.0088	0.1182	0.0054	0.016	0.06	0.4818	0.1275	0.1596	0.0028	0.5046	0.0177	0.2771	0.0287	0.1267	0.0108	0.0151	0.0343	0.0588	0.0778	0.0246	0.0319	0.039	0	0.083	0.0284	0.0434	0.0409	0.0176	0.081	0.0782	0.1509	0.0056	0.1313	0.1666	0.0395	0.3583	0
6253	RTN2	reticulon 2	0.4132	0	0	0	0	0	0	0	0.3464	0	0	0	0	0	0	0	0	0	0	0	0.0393	0	0.013	0	0.0549	0	0.0032	0.0048	0	0	0	0.0232	0	0	0	0	0.0157	0	0.0069	0	0	0	0	0	0.1149	0.009	0.0755
8454	CUL1	cullin 1	0.2849	0.0877	0.2215	0.2598	0.4162	0.2679	0.4335	0.19	0.4961	0.3425	0.4701	0.2776	0.0641	0.2385	0.0868	0.2148	0.0855	0.0671	0.1121	0.0358	0.2593	0.3826	0.0709	0.4005	0.0817	0.1526	0.1321	0.1174	0.2599	0.3173	0.2559	0.1929	0.0969	0.1959	0.4641	0.1415	0.283	0.2441	0.2976	0.0654	2.19	0.0925	0.2475	0.1718	0.6287	0.1882	0.2242
84295	PHF6	PHD finger protein 6	0.0309	0	0.0028	0	0	0	0.3972	0.0279	0.078	0	0	0	0	0.0286	0.0164	0.0208	0.0144	0.0074	0	0	0.008	0	0.1502	0	0.0062	0	0.0277	0	0	0.8146	0.0136	0	0.0276	0.0185	0.0736	0	0	0.0157	0.1017	1.1734	0	0	0	0	0.0214	1.0814	0
9879	DDX46	DEAD (Asp-Glu-Ala-Asp) box polypeptide 46	0.8956	0.1233	1.0152	1.6383	0.3451	0.4589	0.9711	3.6982	0.6161	0.498	1.5646	2.0233	0.0554	0.754	1.0497	1.4368	0.4411	0.2944	1.3162	0.1866	1.8881	2.0854	0.2933	0.459	0.7524	0.6367	0.1695	0.2137	0.4003	0.2597	0.296	0.1812	0.1468	0.2828	0.1764	0.2822	0.4455	0.1868	0.3962	0.1742	0.7792	0.0826	1.1417	0.6539	0.7107	0.4876	0.4686
9823	ARMCX2	armadillo repeat containing, X-linked 2	0	0.018	0.0549	0.0526	0.2835	0.2398	0.089	0.9453	0.0234	0.1367	0	0.0303	0	0.2357	0	0	0	0.114	0	0	0.3942	3.9707	0	0.0899	0.0526	0.0951	0.1267	3.2924	0.022	0.2698	0	0	0.0188	0.1691	0.0176	0.199	0.0075	0.134	0.0415	0.3008	0.8903	0.2919	0.0419	0.0754	0.0435	0.164	0.0711
10053	AP1M2	adaptor-related protein complex 1, mu 2 subunit	0.0871	1.3743	0.1978	0.642	0.2883	2.2082	0.6318	1.564	0.163	4.329	0.6225	2.0416	0.0787	0.7804	0.6817	4.3004	0.3685	1.8216	0.3286	0.2926	0.2382	2.5041	0.0713	2.4317	0.2629	1.5521	0.511	0.3138	0.2186	0.6502	0.065	0.5534	0.1351	1.0366	0.0717	0.2889	0.4886	0.7114	0.5427	1.0509	0.1465	0.9223	0.393	1.7512	0.9167	3.4522	0.0978
7525	YES1	v-yes-1 Yamaguchi sarcoma viral oncogene homolog 1	3.446	0.1499	0.2922	0.1574	0.4077	0.0914	0.6266	0.3073	0.3026	0.4078	0.3694	0.3969	0.0351	0.5183	0.1677	0.1567	0.1909	0.073	0.1823	0.0743	0.2566	0.3875	0.0913	0.2676	0.2773	0.2573	0.1636	0.1619	0.0859	0.3262	0.0724	0.1858	0.2864	0.3106	0.1673	0.1662	0.505	0.5292	0.3136	0.2463	0.1889	0.2027	0.3141	0.4219	0.2325	0.1876	0.0937
8943	AP3D1	adaptor-related protein complex 3, delta 1 subunit	0.9959	0.7138	0.9031	0.6717	2.5696	1.126	0.9673	0.7595	0.8029	1.0367	0.5542	0.8593	0.0717	1.3472	0.5019	0.6868	0.7149	0.1423	0.3384	0.09	0.8223	1.1684	0.184	1.7697	0.7501	1.0028	0.3259	0.4962	0.3271	0.8225	0.7168	0.6621	0.3499	0.5736	0.7171	0.5027	0.4383	0.9256	0.4252	0.5076	0.973	0.4183	0.6191	0.5161	0.8009	0.4852	0.2885
8881	CDC16	cell division cycle 16	0.203	0.031	0.0754	0.0278	0.1914	0.1074	0.1412	0.1654	0.1331	0.1086	0.1997	0.2856	0.0161	0.0531	0.062	0.0892	0.2086	0.0063	0.0173	0.0032	0.096	11.2499	0.0064	0.051	0.0499	0.015	0.0951	0.0783	0.0889	0.0673	0.1314	0.1045	0.0675	0.103	0.2044	0.0911	0.1351	0.0641	0.1293	0.0474	0.1049	0.2802	0.1314	8.6645	0.5419	0.0382	0.0675
933	CD22	CD22 molecule	0.0987	0	0	0	0	0	0	0	0	0	0	0	0	0	0	0	0	0	0	0	0	0	0	0	0	0	0	0	0	0	0	0	0	0	0	0	0	0	0	0	0	0	0	0	0	0	0
9584	RBM39	RNA binding motif protein 39	0.6385	1.0325	0.6453	1.1182	0.8316	1.0689	1.8237	1.2853	1.1953	1.3894	0.6353	1.3935	0.1602	1.7608	1.2018	1.4186	0.9224	0.3114	0.5243	10.5811	1.2108	1.1556	0.5521	0.7212	0.7011	0.5987	0.8328	0.6452	0.7654	1.0953	1.1602	0.5415	0.4514	1.1512	1.0321	1.287	0.6271	0.8087	0.5983	0.8379	1.199	0.1702	2.2414	0.9177	0.6181	1.5414	1.1051
57514	ARHGAP31	Rho GTPase activating protein 31	0	0	0	0	0	0	0.0113	0	0	0	0.0174	0	0.0074	0	0.033	0	0	0.0022	0.0146	0	0.0651	0	0.0193	0	0.0358	0	0	0	0	0	0	0	0.0016	0	0	0	0	0	0	0	0	0	0.03	0	0	0	0.0036
6277	S100A6	S100 calcium binding protein A6	3.7231	2.3668	31.609	18.0109	29.3589	30.7692	17.6557	34.9874	25.4447	9.3446	4.8611	4.5121	3.1876	17.3524	0.4859	7.9311	0.6703	3.477	35.3385	178.362	11.7374	21.9625	15.5628	36.3478	27.4532	38.3201	73.291	61.7275	71.9106	72.7137	25.5712	48.0004	35.5143	61.3327	5.2419	33.0418	14.8846	29.8162	25.2326	63.2053	5.0835	1.0319	2.8949	5.1867	4.6727	13.4067	6.0416
72	ACTG2	actin, gamma 2, smooth muscle, enteric	535.003	104.573	241.167	355.324	400.954	205.417	314.577	512.567	437.174	537.051	329.02	238.064	14.3399	268.031	479.317	375.741	277.616	129.87	129.068	113.163	309.324	301.318	55.8034	297.447	342.118	162.45	177.721	295.066	104.597	200.133	202.569	262.971	81.5488	280.248	112.869	135.988	130.577	425.13	156.719	141.429	269.012	141.582	201.665	155.345	169.964	402.06	119.409
10207	INADL	InaD-like (Drosophila)	0	0.307	0.0346	0.0996	0.046	0.4223	0.1229	0.0958	0.0238	0.2947	0.0124	0.3006	0.0024	0.1966	0.011	0.1624	0.035	0.0177	0.0017	0.0085	0.0184	0.7655	0.0043	0.1054	0.0008	0.1804	0.0368	0.1647	0.0102	0.2078	0.0213	0.2477	0.0084	0.2357	0.0028	0.2836	0.0023	0.5565	0.0508	0.4846	0.0078	0.1161	0.0352	0.1206	0.006	0.1554	0.0017
51030	TVP23B	trans-golgi network vesicle protein 23 homolog B (S. cerevisiae)	0.0522	0	0	0	0	0	0	0	0	0	0	0	0	0	0	0	0	0	0	0	0	0	0	0	0	0	0	0	0	0	0	0	0	0	0	0	0	0	0	0	0	0	0	0	0	0	0
1654	DDX3X	DEAD (Asp-Glu-Ala-Asp) box helicase 3, X-linked	2.1348	1.0354	2.4445	1.4897	3.7727	1.4209	2.3488	2.6979	3.1757	2.6239	2.1068	2.0839	0.2931	1.9992	1.9279	1.9606	1.2135	0.6723	1.567	0.354	2.1224	2.1239	0.6164	1.1371	1.786	1.5221	1.626	2.015	1.3861	2.6806	1.4618	1.2073	0.8254	1.875	2.4213	1.5433	1.6927	1.9566	1.6242	1.6944	1.363	0.7986	2.0544	1.6118	1.2631	2.2771	1.0853
55227	LRRC1	leucine rich repeat containing 1	0.223	0.3133	0.0707	0.3438	0.4126	0.2614	0.245	0.424	0.126	0.4942	0.0749	0.4083	0.0189	0.4812	0.1228	0.7734	0.1181	0.109	0.0132	0.1168	0.0575	0.2795	0.0098	0.3256	0.0062	0.266	0.0093	0.8289	0.0391	2.8309	0.0338	0.2117	0.1621	1.1285	1.194	0.258	0.0879	0.2722	0.3888	1.706	0.023	0.0366	0.0558	0.206	0.0611	0.4275	0.0376
816	CAMK2B	calcium/calmodulin-dependent protein kinase II beta	0.0773	0.1021	0.2372	0.4028	0.4524	0.6078	0.2391	0.2855	0.2039	0.3631	0.2874	0.1777	0.0601	0.2243	0.257	0.3988	0.0669	0.0504	0.1925	0.0158	0.413	0.3906	0.0814	0.3941	0.251	0.1711	0.2851	0.3246	0.2707	0.352	0.2365	0.401	0.1702	0.2865	0.3988	0.3347	0.317	0.3889	0.2779	0.3064	0.3009	0.3246	0.3963	0.2181	0.6105	0.1962	0.2344
55680	RUFY2	RUN and FYVE domain containing 2	0.0268	0.2062	0.1468	0.027	0.052	0	0.0141	0.0959	0.0281	0.8698	0.096	0.0438	0.0031	0.113	0.0276	0.2502	0.0786	0.0041	0.5808	0.3799	0.3702	0.8021	0.0074	0.015	0.2991	0.3809	0.3	0.2859	0.0494	1.2009	0.1844	0.0256	0.1068	0.0584	0.5355	0.9193	0.1223	1.2715	0.0763	0.0648	0.0061	0.0393	0	0.0536	0.1659	0.0538	0.0728
7296	TXNRD1	thioredoxin reductase 1	4.4517	1.1167	1.5446	1.4411	3.3281	1.825	3.0505	1.8786	5.2218	2.721	4.0307	2.0869	0.5893	1.5732	1.7481	3.4106	1.2361	0.488	1.6229	0.6546	1.3554	3.0541	0.4381	2.0592	1.0313	1.2244	0.6826	1.4859	0.8112	2.9023	1.8357	2.3529	0.8899	2.1116	1.5736	1.7556	1.0391	2.0466	1.298	1.2396	6.9574	1.7027	2.9366	1.2947	2.6839	1.3265	2.1333
10810	WASF3	WAS protein family, member 3	0	0.271	0	0.2158	0.012	0	0.1156	0	0.0308	0	0.3457	0.5451	0.0201	0.3101	0.0281	0.0847	0	0.0174	0	0.02	0.1479	0.3917	0.0247	0.1074	0.0471	0.2185	0	0.0097	0.0403	0	0	0	0	0.0359	0.0134	0	0.0405	0	0	0.0795	0	0	0.1231	0	0	0.0484	0.0508
2949	GSTM5	glutathione S-transferase mu 5	0.3434	0.3935	0.0495	0.1137	0.1405	0.186	0.2004	0.1806	0.2496	0.3287	0.2181	0.3607	0.0466	0.2518	0.1755	0.1555	0.3037	0.0953	0.8636	0.5205	0.113	0.3503	0.0357	0.3197	0.9634	0.5475	0.3815	0.2133	0.0355	0.0776	0.0588	0.184	0.4713	0.5941	0.0242	0.1523	0.1115	0.0692	0.0908	0.1726	0	0.0447	0.3769	0.2717	0.1098	0.0864	0.1903
79077	DCTPP1	dCTP pyrophosphatase 1	1.1136	0.0482	1.1962	0.045	2.6645	0.1896	0.5583	0.1921	3.7822	0.2353	5.5874	0.1262	0.2449	0.0998	0.347	0	0.5508	0.0475	0.1715	0.0489	2.0804	0.1076	0.1035	0.1158	0.2629	0.0435	1.1956	0.0782	0.7399	0.0937	0.5567	0.1121	0.5342	0.2285	1.4905	0.0857	0.4129	0.0802	0.7822	0.1408	1.1042	0	1.5455	0.0563	0.4226	0.2112	0.2599
643854	CTAGE9	CTAGE family, member 9	0	0.0007	0.0008	0.0019	0	0.0171	0.0027	0.0015	0.0018	0	0.0015	0.0039	0	0.1901	0	0	0	0	0.0038	0	0.0185	0.0016	0.0003	0.0008	0.0006	0.0008	0	0.0016	0	0	0	0	0	0.0023	0	0.0027	0.0041	0.0246	0	0	0.0029	0.0008	0	0.0017	0	0.0009	0.0052
56886	UGGT1	UDP-glucose glycoprotein glucosyltransferase 1	2.214	1.1867	1.2336	1.8191	3.1239	3.6661	1.2168	2.2305	1.7207	4.2279	1.7345	1.6901	0.3452	2.673	0.8648	1.5355	1.7451	0.3579	0.6848	0.2373	2.163	3.169	0.9022	1.2334	1.7641	2.5772	0.6202	0.9691	0.3985	1.4326	1.1441	1.1749	0.7869	3.7454	2.4457	2.3047	1.5933	1.5043	1.4489	2.1122	1.9505	0.5237	1.167	1.0609	0.9667	1.4378	1.3059
55748	CNDP2	CNDP dipeptidase 2 (metallopeptidase M20 family)	364.641	112.179	234.992	256.891	528.922	242.337	399.178	114.25	539.057	267.781	752.908	199.271	95.5427	199.507	226.621	198.727	522.24	24.864	216.843	11.0797	264.764	205	40.8693	192.896	280.132	130.786	275.593	152.526	388.276	305.01	484.66	206.614	146.529	212.206	250.038	191.278	204.787	107.755	550.309	93.3311	609.325	67.1774	337.112	137.664	369.953	164.832	215.18
23264	ZC3H7B	zinc finger CCCH-type containing 7B	0.3432	0.0065	0.0027	0.0802	0.0207	0.0114	0.1979	0.1969	0	0.0987	0.012	0.0058	0	0.0175	0	0.094	0.0159	0	0.0058	0.0087	0.0031	0.02	0.0085	0.1196	0.0957	0.0069	0.0154	0.0147	0.017	1.5678	2.2036	2.2833	0	0.1863	0	0.464	0	0.01	0.0058	0.0072	0.0042	0.0052	0.2308	0.1427	0.0355	0.0115	0.0101
4643	MYO1E	myosin IE	1.4419	0.3092	0.5396	0.2223	0.971	3.4249	0.338	0.4156	0.948	2.382	0.5701	0.233	0.0647	0.2387	0.3931	0.1925	0.1183	0.0757	0.2427	0.0214	0.9314	0.2956	0.1016	0.2715	0.331	1.2754	0.4425	0.5361	0.1346	0.2721	0.285	0.085	0.0971	0.1049	0.2728	0.1062	0.4118	0.4587	0.4378	0.2749	0.2399	0.1527	0.2814	0.1004	0.2474	0.1959	0.0655
23770	FKBP8	FK506 binding protein 8, 38kDa	0.2138	0.4371	0.6667	0.7124	0.5426	1.3193	0.3333	0.8448	0.4204	0.8093	0.018	0.6635	0.0776	2.1393	0.2644	0.9159	0.4736	0.1922	0.052	0.3291	0.3634	0.9744	0.1306	0.5027	0.2122	0.7428	0.2874	0.4912	0.1459	1.6008	0.3457	1.0122	0.4358	0.7898	0.5146	0.9095	0.3187	0.8579	0.5565	0.7128	0.5635	0.4365	0.2027	0.6725	0.276	0.7215	0.581
2629	GBA	glucosidase, beta, acid	0.5054	0.8132	0.419	0.9429	0.3373	0.2115	0.1407	0.497	0.5675	0.9356	0.5257	0.399	0.0435	0.7013	0.2748	0.2909	0.4067	0.1896	2.757	0.1275	0.4493	0.9069	0.0756	0.8002	0.3349	0.2854	0.099	0.5012	0.2614	2.3869	0.1387	0.1209	0.1388	1.5104	0.175	0.929	1.2553	0.0929	1.0996	1.1871	0.3586	0.2251	0.4229	0.2686	0.5466	0.6535	0.176
90522	YIF1B	Yip1 interacting factor homolog B (S. cerevisiae)	0.5836	0.1185	0.624	0.1512	0.4817	0.0714	1.0593	1.3805	0.8462	0.3378	0.8144	0.1671	0.0791	0.2373	0.4466	0.8749	0.3918	0.2092	0.3654	0	0.2873	0.0938	0.1318	0.2284	0.1021	0	0	0.7914	0.4982	0.107	0.1026	0.1132	0.3565	0.098	0.2854	0.8251	0.0297	1.0819	0.5315	0.6373	0	0.1762	0.2156	0.1203	0.4904	0.8737	0.5136
654346	LGALS9C	lectin, galactoside-binding, soluble, 9C	0.1085	0.0113	0.1864	0	0.6724	0.0269	0.2848	0.0812	0.6007	0.1451	0.335	0.0737	0.045	0.1822	0.1711	0	0.2133	0.0169	0.0728	0.0334	0.349	0.0309	0.1036	0	0.152	0	0.1173	0.0131	0.1078	0	0.1233	0.0281	0.0973	0.0141	0.2409	0	0.0982	0	0.0957	0	0.3754	0	0.1146	0	0.3339	0.047	0.1995
100653243	LOC100653243	uncharacterized LOC100653243	0.0564	0.0533	0.1292	0.0029	0.1858	0.0968	0.4275	0.8088	0.248	0	0.1177	0.0777	0.8178	0	0.0994	0.0293	0.7717	0.1258	0.4245	0.0739	0.1227	0	0.0067	0.0093	0.1198	0.07	0.1077	0.0221	0.0877	0	0.0224	0.0641	0.0818	0.0123	0.4458	0.0488	0.0755	0.0349	0.0873	0.1073	0.1034	0	0.1388	0.0033	0.1569	0.1447	0.2954
9118	INA	internexin neuronal intermediate filament protein, alpha	18.9478	0.7964	24.1139	1.662	19.975	2.3246	33.4327	0.1072	25.4869	7.9179	32.2492	2.8467	0.8717	0.6073	15.2871	3.4099	13.0931	0.5663	11.1722	2.079	22.3674	0.7755	3.419	0.6249	8.5926	0.7864	5.0325	1.8106	2.6106	0.5668	12.6149	1.2262	6.6956	2.2895	9.3536	0.8815	11.1544	1.1915	7.6521	0.4107	15.2274	0.6277	22.1976	0.5794	25.9733	0.3744	0.1329
9362	CPNE6	copine VI (neuronal)	0.0723	0.42	0.0645	0.1179	0.1256	0.9956	0.2442	0.0394	0.281	0.4241	0.2965	0.4181	0.0078	0.2084	0.124	1.0694	0.0236	0.0188	0.0235	0.0066	0.0896	0.4075	0.0221	0.4752	0.1322	0.1566	0.047	0.0497	0.0361	1.8204	0.0483	1.7919	0.0335	0.0638	0.0604	0.8415	0.0692	0.3061	0.0773	0.9252	0.0593	1.3963	0.151	1.4672	0.0203	0.055	0.0131
219293	ATAD3C	ATPase family, AAA domain containing 3C	0.0421	0.2377	0.1888	0.2968	0.3874	0.2593	0.2559	0.1528	0.4236	0.3615	0.3937	0.3705	0	0.114	0.1981	0.4407	0.2619	0.1948	0.1052	0.1125	0.2548	0.2669	0.0513	0.298	0.0588	0.2522	0.0179	0.1216	0.0399	0.2642	0.0336	0.0794	0.0233	0.1376	0.1696	0.2236	0.0915	0.2501	0.1164	0.1533	0.4453	0.1153	0.2947	0.3371	0.2338	0.2684	0.0132
43	ACHE	acetylcholinesterase	0.0652	0	0.0027	0.0136	0	0	0.0052	0	0	0	0	0	0	0	0	0	0	0	0	0	0.017	0.0795	0	0.0817	0	0.0202	0	0	0	0.0108	0	0	0.0021	0	0	0	0	0	0.0043	0	0	0	0	0	0	0	0
5198	PFAS	phosphoribosylformylglycinamidine synthase	1.666	0.5079	0.3506	0.297	0.3483	0.4325	0.7824	0.5771	1.1078	0.7192	1.2027	0.5602	0.1529	0.2779	1.4889	0.9008	0.2094	0.2021	0.1593	0.2469	0.6968	0.8105	0.1833	0.8167	0.4959	0.2419	0.1752	0.1974	0.3016	0.2501	0.4157	0.215	0.1505	0.3317	0.4212	0.2973	0.3919	0.2563	0.5056	0.2113	0.1917	0.1117	0.6632	0.177	0.4728	0.8884	0.1267
6514	SLC2A2	solute carrier family 2 (facilitated glucose transporter), member 2	0.0306	0.8351	0.3274	2.9718	0.1293	4.0124	0	0.3593	0.0959	1.9908	0.6257	2.3052	0.0403	2.6813	0.0786	1.1481	1.0246	0	0.1256	0	0.65	1.274	0.0576	1.7768	0.4195	1.1893	0.2144	0.7583	0.4372	1.8109	0.0928	1.9984	0.2752	0.5277	0.205	2.2996	0.3243	1.5329	0.0215	1.4593	0.115	4.3221	0.0739	3.3181	0	0.3097	0
23167	EFR3A	EFR3 homolog A (S. cerevisiae)	0.0227	0.0425	0.1225	0.1064	0.355	0.1491	0.4553	0.1678	0.0804	0.2225	0.0627	0.1998	0	0.1152	0.0509	0.1423	0.2733	0.0297	0.0438	0.0283	0.1071	0.1815	0.1966	0.1835	0.1274	0.0578	0.5006	0.1576	0.3902	0.2901	0.5663	0.4358	0.2602	0.1356	0.9056	0.0628	0.2358	0.2051	0.1912	0.111	0.1851	0.1175	0.3082	0.058	0.0868	0.046	0.0153
115704	EVI5L	ecotropic viral integration site 5-like	0.0079	0	0	0.0562	0	0.0077	0.0047	0	0	0.0072	0.0069	0.0394	0	0.0326	0	0.1112	0	0	0	0.071	0	0.0273	0	0.0648	0.0138	0	0	0.0351	0	0	0	0.0081	0	0	0	0	0	0.0266	0	0.0104	0	0.0851	0	0.0166	0	0.0554	0
85377	MICALL1	MICAL-like 1	0.0092	0.008	0.0133	0	0.0036	0.0126	0.1443	0	0	0.2288	0.0032	0.016	0	0.0088	0.0099	0.01	0.0045	0.0056	0	0.0026	0.0041	0	0.001	0	0.0024	0.0034	0.0085	0.0068	0.0079	0.0096	0.0114	0.0028	0	0.0065	0.0179	0.0077	0.012	0.0064	0.003	0	0.0729	0.0078	0.0058	0.0208	0.018	0.0012	0.1979
3109	HLA-DMB	major histocompatibility complex, class II, DM beta	0.1538	0	0.4639	0.0231	1.9919	0	0.4736	0	1.0316	0	0.3198	0	0.0521	0.0622	0.3216	0.1443	0.1726	0.1541	0.044	0.0239	0.8418	0.0639	0.3293	0.017	0.4387	0.0629	0.2397	0	0.0928	0	0.1549	0.0345	0.171	0.1722	0.4595	0	0.2293	0.0503	0.2922	0.0621	0.1842	0	0.0466	0	1.2955	0.0482	0.6404
10539	GLRX3	glutaredoxin 3	1.7392	0.8461	0.0883	1.0172	1.7954	1.2529	2.4074	0.9102	2.3612	1.4936	1.9099	2.2923	0.1693	0.8036	1.3229	1.0585	2.5468	0.0618	2.1213	0.3695	1.9563	0.458	0.4338	0.9937	0.6257	0.7416	0.5042	1.5936	0.6617	1.0074	0.7714	1.1631	0.5767	1.3676	0.9335	1.2545	1.29	0.6346	1.107	0.8283	2.7444	0.044	0.8401	1.0161	0.4811	0.4104	0.3299
391	RHOG	ras homolog family member G	1.7275	0.6643	2.2961	0.3892	3.2127	2.9821	2.8173	1.0319	2.7289	2.7788	0.4165	1.1849	0.2201	0.5831	2.1933	0.9413	0.9909	0.395	0.6402	0.1318	1.034	0.8318	0.5129	0.2708	1.0803	0.2501	0.7949	1.1296	0.6125	1.1069	1.115	2.337	1.0906	1.9661	3.487	1.9474	1.6741	2.4458	2.3621	1.8549	0.8669	0.43	0.9336	0.6326	1.3978	0.6936	0.875
5025	P2RX4	purinergic receptor P2X, ligand-gated ion channel, 4	0.0267	0.0267	0.1	0.8366	0.6412	2.2679	0.1038	0.0035	0.2928	0.0201	0.3093	1.1697	0.0036	0.0133	0.3319	0.1836	0.5823	0	0.0657	0	0.1194	0.857	0.0232	0.0936	0.011	0.3964	0.0909	0.0533	0.0855	0.1059	0.0726	0.0775	0.006	0.0425	2.4976	0.013	0.0565	0.1039	0.0522	0.0158	0.6925	0.0084	0.1312	0.0666	0.0921	0.0285	0.0069
1687	DFNA5	deafness, autosomal dominant 5	0.4201	0.095	0.0647	0.0602	0.6055	0.1801	0.5653	0.1292	2.2923	0.2256	0.8791	0.1193	0.0121	0.1022	0.0113	0.1055	0.0085	0.031	0.0248	0.0172	0.206	0.1135	0.0404	0.2057	0.0758	0.0683	0.0549	0.0461	0.082	0.2641	0	0.0746	0.028	0.0829	0.167	0.2402	0.5907	0.136	0.1137	0.0592	0.6273	0.0275	0.2292	0.0533	0.4337	0.2081	0.1548
8411	EEA1	early endosome antigen 1	4.3938	0.5187	0.8236	1.2937	4.551	1.7396	1.8428	0.49	1.9283	3.1456	2.965	0.8248	0.0625	1.1098	0.4735	1.0798	0.458	0.178	1.1528	0.2349	1.4797	1.8657	0.5683	1.8644	2.4668	0.864	0.689	1.092	1.1969	2.2811	1.7103	1.2084	0.948	1.5242	0.708	0.9021	1.3498	1.0211	0.9302	0.7097	0.5571	0.2783	1.7147	1.4058	1.1698	0.4993	0.4316
4240	MFGE8	milk fat globule-EGF factor 8 protein	1.3201	1.1275	0.2448	0.9538	4.8814	2.6048	0.1278	1.3624	3.3498	4.5961	0.0743	1.5431	0.3928	0.8129	1.0814	2.4261	0.9468	0.4907	1.4285	0.4898	1.3641	1.9278	0.2016	2.4803	1.3493	0.8729	1.5455	2.8715	0.1935	2.6557	1.5353	2.2131	0.712	3.1161	0.8411	0.4941	0.1294	1.7113	0.0817	2.7545	0.761	0.9189	0.8773	0.1753	0.2864	0.8819	0.3951
30000	TNPO2	transportin 2	0.5076	0.1238	0.2669	0.1395	0.5011	0.2504	0.4834	0.3145	0.6171	0.4997	0.5292	0.2996	0.0385	0.2188	0.3497	0.7576	3.1125	0.0797	0.2302	0.0565	0.5203	0.41	0.0482	0.2653	1.9875	0.1479	0.2682	0.1267	0.155	0.2202	0.4161	0.1459	0.1382	0.2626	0.3859	0.2451	0.251	0.248	0.3066	0.2233	0.3576	0.083	4.86	0.1429	0.3136	0.2624	0.1397
2521	FUS	fused in sarcoma	6.5063	1.9485	3.379	1.9822	4.5465	1.129	14.8426	5.7343	9.1625	4.0977	4.1738	3.6885	1.133	4.289	3.8713	3.6496	6.0465	1.4527	6.1757	1.5114	3.1009	1.5426	1.5285	0.827	4.3336	0.9747	3.1039	1.7025	2.7111	2.6457	3.2152	1.4078	1.9478	2.1879	3.0825	1.7225	3.2714	2.3207	4.2354	1.3866	7.4892	1.3309	6.7443	2.6567	3.1055	5.281	2.2694
6204	RPS10	ribosomal protein S10	16.8677	6.6074	4.174	5.0425	9.921	18.1857	21.9909	16.6989	26.2699	15.6174	32.0036	2.9487	1.6478	16.5918	6.7581	9.185	4.7966	1.5488	2.3527	0.8766	12.9016	19.6494	1.069	9.2003	13.3523	10.3249	5.9762	11.934	4.1291	19.2718	7.717	6.9185	6.8329	23.7992	9.4877	12.8766	2.0694	8.7845	18.6308	9.2732	11.0724	0.8467	16.1295	5.8488	3.5806	18.0715	0.9504
115827	RAB3C	RAB3C, member RAS oncogene family	0.1022	0	0.0735	0	0.0703	0.0119	0.0263	0.0853	0	0.0219	0.0328	0.0244	0.0182	0.0621	0.0599	0.0441	0.0158	0.0257	0.0458	0	0.0437	0.0203	0.0146	0.0131	0.0672	0	0.0323	0	0	0.0182	0.1011	0	0.0202	0.0314	0.0506	0.0256	0.0452	0.0508	0.0601	0.0065	0.0227	0	0.1119	0	0.0165	0.0477	0.0277
84320	ACBD6	acyl-CoA binding domain containing 6	0.8389	0.0659	0.0343	0.0461	0.0543	0.0541	0.0422	0	0.3792	0.1075	0	0	0.0231	0.0149	0.0195	0	0.2357	0.0487	0.0292	0	0	0	0	0	0	0.0377	0.0105	0	0.0289	0.0101	0.013	0	0	0.0544	0.0907	0.0423	0.0714	0.0442	0.0878	0.0321	0.0593	0	0.2297	0.0137	0.0448	0.155	0.0515
55770	EXOC2	exocyst complex component 2	0.5861	0.1475	0.3296	0.0595	1.1488	0.4292	0.4682	0.2976	0.4238	0.7558	0.2484	0.1589	0.0979	0.2066	0.2178	0.4604	0.1081	0.074	0.7277	0.1638	0.722	0.3715	0.1085	0.114	0.5193	0.1059	0.099	0.5879	0.5575	0.4731	0.9943	0.5771	0.2389	0.4953	1.5916	0.2195	0.8197	0.6011	0.3319	0.2835	0.1552	0.0147	0.1936	0.0562	0.1381	0.2856	0.1241
7316	UBC	ubiquitin C	31.6376	3.9484	23.1336	35.9621	24.1452	35.1362	38.0894	34.8162	32.6153	30.1678	23.2125	15.9336	2.6742	14.8042	14.7161	3.9167	8.0347	6.7481	16.3341	8.0832	45.3067	25.3132	31.1188	27.8107	71.4495	16.9645	49.353	24.8391	23.5999	33.7535	29.2219	26.7749	15.0633	45.9128	25.0258	12.7939	32.0718	26.107	39.169	17.4725	21.1917	8.2314	27.3509	15.0734	35.9793	34.8408	10.8619
58490	RPRD1B	regulation of nuclear pre-mRNA domain containing 1B	0.8822	0.86	0.593	0.4074	1.1601	0.8995	2.0536	0.8308	3.6969	1.3097	0.6161	2.4279	0.2303	1.6994	0.5496	2.145	0.7152	0.3834	0.9252	0.3921	2.0627	1.9721	0.3315	1.4497	1.0414	0.7241	0.4546	0.9816	0.8072	2.6415	0.835	2.8765	0.81	2.7591	1.4696	4.1998	1.3945	1.9138	1.8962	2.962	4.4456	0.2307	3.5397	0.9789	0.4998	1.4972	0.6743
728932	GPR89C	G protein-coupled receptor 89C	0.0812	0.1319	0.1073	0.1612	0.085	0.1983	0.2975	0.254	0.0395	0.2019	0.1046	0.2335	0.028	0.33	0.0506	0.1661	0.534	0.0302	0.1446	0.0136	0.7855	0.6909	0.0817	0.1664	0.0545	0.2202	0.0397	0.1487	0.0551	0.2011	0.037	0.1681	0.0579	0.1234	0.1791	0.1075	0.1117	0.1851	0.0707	0.1637	0.7311	0.0693	0.2523	0.2669	0.2377	0.1648	0.1081
5832	ALDH18A1	aldehyde dehydrogenase 18 family, member A1	1.8016	0.6863	1.9968	0.7211	3.4358	0.8028	0.6296	0.3922	2.6106	0.9873	4.6702	0.6342	0.4674	2.3104	0.1748	0.5368	0.2751	0.1734	0.1389	0.3602	1.6891	1.8544	0.0444	1.207	0.2587	0.4679	0.1418	0.5954	0.5537	1.5956	0.7977	0.9148	0.063	0.595	1.8031	0.6537	0.2737	0.983	0.749	0.4934	2.6242	0.2679	1.9343	0.3865	0.4586	0.3476	0.1023
23519	ANP32D	acidic (leucine-rich) nuclear phosphoprotein 32 family, member D	0.0391	0	0	0.0436	0.0279	0.0803	0	0	0	0	0.0291	0.0344	0	0	0.0447	0	0.0187	0	0	0	0.0144	0.0658	0.0425	0.0249	0.056	0.0396	0	0	0	0	0	0	0	0	0	0	0	0	0	0	0	0.2475	0	0.0203	0.1598	0	0
7159	TP53BP2	tumor protein p53 binding protein, 2	0.036	0.0086	0	0.145	0.0029	0.0281	0.0823	0.0162	0	0.6021	0.0135	0.0183	0	0.0106	0.0384	0.0056	0.0047	0.0179	0	0	0	0.1121	0.0216	0	0.0048	0.0544	0.0031	0.0094	0	0.0089	0	0	0	0.0131	0	0.0289	0	0.6268	0.0113	0.0244	0.0908	0.0105	0.08	0.0084	0	0	0
5286	PIK3C2A	phosphatidylinositol-4-phosphate 3-kinase, catalytic subunit type 2 alpha	0.0523	0.0297	0.0646	0.0462	0.1519	0.0212	0.0521	0.288	0.0345	0.3447	0.0245	0.4023	0.0135	0.037	0.0378	0.0189	0.2357	0.0185	0.1282	0.0104	0.2064	0.0556	0.0399	0.2114	0.0756	0.0245	0.0299	0.0177	0.0525	0.0498	0.0383	0.0214	0.0262	0.0591	0.0751	0.0644	0.0718	0.3088	0.092	0.0395	0.0082	0.0018	0.0123	0.0083	0.0467	0.047	0.03
3875	KRT18	keratin 18	31.2049	16.1853	161.808	66.5395	65.1307	48.5258	82.8876	63.9431	51.7549	47.3479	115.881	45.5528	22.6102	54.547	21.1785	36.5191	90.1874	19.7912	48.8153	15.9854	32.7222	49.4666	5.5488	60.3845	44.8325	27.0295	52.7946	43.9069	15.3121	43.4184	22.7278	60.3325	25.7471	74.4301	34.3072	31.0349	26.6685	46.7378	38.6734	58.5671	313.771	19.3819	66.3656	37.543	68.1584	58.0914	32.2363
23012	STK38L	serine/threonine kinase 38 like	0.0779	0.0191	0.0137	0.0507	0.0793	0.0232	0.206	0.152	0.2868	0.2184	0.0414	0.1739	0.0045	0.1552	0.0831	0.0457	0.0332	0.0405	0.0335	0.0386	0.0883	0.081	0.0154	0.0681	0.0441	0.0259	0.0081	0.0421	0.0198	0.0354	0.0492	0.0257	0.0143	0.0774	0.0465	0.0108	0.1263	0.048	0.1017	0.0078	0.0307	0.0347	0.1423	0.0555	0.2128	0.1381	0.1718
57130	ATP13A1	ATPase type 13A1	0.8344	0.2378	0.3223	0.727	1.3385	0.8086	1.1538	1.0636	3.015	1.5992	1.5785	1.0721	0.3134	0.9062	0.5159	0.2606	0.6413	0.1843	0.3186	0.5771	0.8473	0.849	0.0945	0.6834	0.4451	0.5038	0.123	1.2548	0.2153	0.5537	0.6843	1.633	0.2346	0.6386	0.6515	0.4295	0.1471	0.5546	0.5115	0.6178	0.8978	0.1709	1.8434	0.7001	0.856	0.4885	0.5776
7779	SLC30A1	solute carrier family 30 (zinc transporter), member 1	0.2872	0.1878	0.6065	0.1561	1.1514	0.9734	0.6657	0.3941	0.8142	0.2856	0.8952	0.2004	0.0873	0.9999	0.1289	0.0918	0.1144	0.2065	0.0895	0.0924	0.4567	0.2941	0.0384	0.243	0.1546	0.1441	0.0364	0.0915	0.0637	1.3878	0.046	0.0482	0.0154	1.3433	0.0891	1.1219	0.2916	1.2574	1.1626	0.1584	0.0371	0.1743	0.1822	0.2408	0.1222	0.3472	0.1971
79701	OGFOD3	2-oxoglutarate and iron-dependent oxygenase domain containing 3	0.0693	0	0.0576	0	0.009	0	0	0	0.0668	0	0	0.0854	0.0237	0.2309	0	0	0	0	0.0333	0	0	0.0698	0	0.0342	0	0	0.0234	0	0.0337	0.0532	0.0606	0.0549	0.0106	0	0.0294	0	0	0.0598	0.0094	0.0177	0	0	0	0	0	0	0
818	CAMK2G	calcium/calmodulin-dependent protein kinase II gamma	0.1895	0.2437	0.3035	1.0194	1.7071	0.9102	0.275	0.5334	0.3209	0.6716	0.3806	0.6272	0.0773	0.6402	0.3317	0.7276	0.1189	0.0752	0.2347	0.0397	0.5165	0.9667	0.125	0.6515	0.3068	0.553	0.5407	0.7575	0.5784	1.0844	0.4527	0.6368	0.1799	0.6809	1.0994	0.5836	0.6486	0.9381	0.4654	0.5463	0.4685	0.4161	0.3981	0.4404	0.7837	0.3517	0.2795
55572	FOXRED1	FAD-dependent oxidoreductase domain containing 1	0	0.2324	0.1211	0.2866	0	0.6099	0.0108	0.2402	0.315	0.4919	0.0668	0.3821	0	0.1895	0.0504	0.6754	0.254	0.1548	0	0.0225	0.0682	0.8619	0.0112	0.6719	0.0697	0.2512	0	0.2798	0	0.4911	0.1757	0.0796	0	0.2659	0.1371	1.4257	0	0.6621	0.0499	0.3232	0.1359	0.1883	0.0372	0.1908	0.0193	0.4694	0
6227	RPS21	ribosomal protein S21	16.1978	4.4588	3.1927	9.8536	10.6719	5.5992	14.1394	15.0684	8.6394	6.1715	8.7638	4.8317	2.8592	12.8954	18.6672	5.4995	6.8655	2.842	5.8316	1.0689	6.6309	4.4334	2.4154	5.2286	4.4155	5.1373	8.2067	6.6334	12.3727	13.0602	16.4305	10.1911	5.8677	12.6293	11.9051	12.3165	7.8007	7.7893	19.7604	12.1907	6.1407	5.9428	4.8026	5.8447	2.555	8.257	8.5017
7257	TSNAX	translin-associated factor X	7.5184	2.0382	0.6672	1.3449	2.0458	1.238	1.8218	1.0649	1.5848	3.8966	0.9021	3.3988	0.1347	3.9807	1.8053	9.0514	0.9297	1.4355	0.8013	0.5688	1.0951	1.5719	0.3103	3.0934	1.0154	2.2269	0.6862	0.9482	0.5487	2.1972	1.2966	0.7017	0.4128	1.3227	1.2232	1.2835	0.866	0.7955	0.9933	0.6813	0.864	0.2655	1.8368	3.025	0.2003	1.8861	0.3817
57549	IGSF9	immunoglobulin superfamily, member 9	0.0508	0	0	0	0	0	0	0	0	0	0	0	0	0	0	0	0	0	0	0	0	0	0	0	0	0	0	0	0	0	0	0	0	0	0	0	0	0	0	0	0	0	0	0	0	0	0
22875	ENPP4	ectonucleotide pyrophosphatase/phosphodiesterase 4 (putative)	0.2601	1.4796	0.3624	1.3512	0.6287	0.1865	0.416	0.252	0.5687	2.4355	0.6679	1.1008	0.1703	0.1717	0.0765	0.3207	0.1345	0.2036	0.0691	0.0563	1.0868	2.6735	0.0603	0.3257	0.2068	0.8055	0.1306	0.2838	0.1997	0.2564	0.2102	0.1513	0.2451	0.2872	0.2462	0.2052	0.1397	0.2909	0.2477	0.3201	0.1545	0.0759	0.5859	1.2187	0.4244	1.3582	0.3737
8050	PDHX	pyruvate dehydrogenase complex, component X	0.1394	2.0535	2.7704	1.8135	2.8989	3.2494	0.9314	1.6873	8.0742	2.5251	6.9207	2.8513	0.0744	1.8891	3.15	2.3917	3.9128	3.5906	0.3482	0.3783	0.9661	3.8434	0.215	1.7299	0.3429	1.6062	1.0802	2.784	0.7149	2.3168	1.133	2.8042	0.3988	3.1304	2.3294	1.3734	0.1128	2.8198	1.7388	1.6727	0.5098	0.7574	0.9564	1.824	0.2616	4.8499	0.2147
54503	ZDHHC13	zinc finger, DHHC-type containing 13	0.0159	0	0.1337	0	0.1596	0	0.029	0.0143	0	0	0.0109	0.0091	0	0	0.0287	0	0.0189	0.0054	0.0111	0.0104	0.0662	0.0156	0	0	0.0152	0	0.009	0.0126	0	0	0	0	0	0	0	0.0023	0	0.0583	0	0.0455	0.0223	0	0.0406	0.0047	0	0.0156	0
10130	PDIA6	protein disulfide isomerase family A, member 6	90.6856	29.2996	31.0408	44.9263	78.5905	42.7771	93.5665	33.9713	140.662	83.153	69.6363	24.6715	4.2236	44.7319	16.1687	45.2099	35.8539	19.5	19.2114	5.1922	48.4504	64.4885	13.6425	34.7452	40.5668	26.0414	30.4509	38.2804	24.388	51.3578	36.5841	42.3366	25.5866	55.72	61.5162	34.5794	42.7656	50.4236	46.2945	36.1826	41.981	15.8607	45.0934	24.7553	90.662	45.3341	46.3682
3572	IL6ST	interleukin 6 signal transducer (gp130, oncostatin M receptor)	0.1083	0.0144	0.0272	0.0102	0.0676	0	0.0118	0	0	0	0.0186	0.0057	0.0091	0.0076	0.02	0.0403	0	0.0071	0	0	0.0245	0	0.0116	0	0.0281	0.0085	0.0046	0.0133	0.0066	0.015	0.0037	0.0593	0.0446	0.0058	0.0299	0.0036	0.0113	0.0613	0.0697	0.0467	0	0	0.0058	0.0063	0.0279	0.0121	0
2734	GLG1	golgi glycoprotein 1	0.7236	0.3421	0.897	1.5828	2.2809	1.0666	1.8572	1.1874	0.537	0.8021	1.6073	0.9504	0.0289	1.1749	0.6344	0.7479	0.5698	0.4702	0.4396	0.1831	1.5444	0.9537	0.3097	0.6434	0.4266	0.5006	0.2785	0.8182	0.3089	0.8539	0.6631	1.2682	0.8802	3.0953	1.9639	3.2933	1.6505	3.0138	1.2882	2.4694	0.4506	0.6418	0.5012	0.4198	0.5172	1.2261	0.2718
5226	PGD	phosphogluconate dehydrogenase	2.4555	2.8559	0.9778	4.3897	0.8016	6.2711	1.4533	5.6899	2.3361	5.2015	4.0294	3.7811	0.5519	3.3975	1.6479	3.715	1.4648	1.9942	1.3344	3.3608	2.1237	6.2867	0.506	5.8698	2.3416	2.5432	1.3609	3.8693	1.5781	9.4308	1.6422	5.47	2.3269	4.0591	1.4504	6.2939	0.8108	4.5678	1.4656	3.7893	1.8478	1.0556	2.986	5.8692	2.387	3.9981	0.9377
63892	THADA	thyroid adenoma associated	0.0351	0	0	0	0.0095	0	0.0022	0	0.0307	0	0.0025	0.0015	0	0	0	0	0	0	0	0	0.0007	0	0	0	0.0008	0	0	0	0	0	0.0013	0	0.001	0	0.0016	0	0	0	0.0022	0.0066	0	0	0	0.0006	0.0042	0	0.0007
2125	EVPL	envoplakin	0.0296	0.7277	0.0944	0.9935	0.133	0.1238	0.9847	0.123	0.0411	0.0286	0.0389	0.8222	0.0052	0.0257	0.252	0.5534	0.2457	0.2435	0.0479	0.0499	0.0401	0.0882	0.0074	0.1045	0.8847	0.057	0.044	0.0271	0.0175	0.0322	0.0013	0.0306	0.0049	0.1842	0.0031	0.0131	0.0119	0.0847	0.1124	0.0273	0.1431	0.0238	0.0317	0.0775	0.0105	0.1777	0
10521	DDX17	DEAD (Asp-Glu-Ala-Asp) box helicase 17	8.0961	3.8264	6.6	3.9464	7.9311	4.5913	14.3758	5.7239	6.107	7.0905	7.2693	6.151	1.0274	10.1974	9.0551	9.0908	10.6435	2.9841	5.1671	1.3395	6.193	8.8365	2.7611	7.1926	6.181	5.083	5.8095	4.8864	4.8135	7.715	7.0139	4.5748	2.7126	8.3831	5.7702	4.4989	3.1315	6.0841	4.7747	3.945	14.8905	1.9875	11.0215	3.805	3.6234	6.2423	2.3023
735	C9	complement component 9	1.9164	6.0214	3.6186	17.5998	1.912	13.6041	1.4442	7.3614	5.3638	6.1945	0.5533	3.9278	2.3867	7.751	2.0135	3.9323	3.581	1.4334	0.869	1.3676	2.1774	7.8581	0.7477	20.0398	1.3015	3.09	1.7929	5.6085	1.7634	10.6816	2.9805	12.6803	1.6426	19.6347	3.552	4.6936	2.4236	3.3198	1.0951	7.7409	5.4419	7.6429	2.1705	10.4736	6.3566	3.3866	1.2674
54534	MRPL50	mitochondrial ribosomal protein L50	0.5979	0.484	0.2084	0.1381	0.4453	0.6	0.1925	1.0797	0.5842	0.6893	1.5084	2.7113	0.1432	0.831	0	1.002	0.2255	0.375	0	0.1161	0.3398	0.5736	0.0532	0.3975	2.1699	1.0172	0.1356	0.6795	0.1052	1.2921	0.3165	0.4389	0.0733	0.9646	0.2176	1.0918	0	0.9037	0.1701	0.7927	0.4506	0.3696	0.4563	0.6325	0.2143	0.9166	0.0482
57092	PCNP	PEST proteolytic signal containing nuclear protein	0.7077	0	0	0.0669	0	0	0.0544	0	0.0186	0	0	0	0	0	0	0	0	0	0.1913	0.1371	0.1975	0.822	0.106	0	0.2483	0	0.0315	0.0222	0	0	0.046	0	0.0442	0.0129	0	0	0	0	0.0058	0.0236	0.3761	0	0	0	0.0501	0.1731	0.0377
3064	HTT	huntingtin	0.0317	0.0243	0.1743	0.0723	0.0644	0.0592	0.1015	0.1862	0.0625	0.1174	0.0096	0.1776	0.0079	0.0545	0.0333	0.0402	0.0395	0.0145	0.0236	0.0083	0.0365	0.1012	0.0048	0.0353	0.0344	0.0178	0.0054	0.0267	0.0029	0.0147	0.0158	0.0557	0.0284	0.0605	0.0393	0.0282	0.4414	0.1423	0.0403	0.0426	0.0365	0.0222	0.0355	0.068	0.0644	0.0169	0.0356
3276	PRMT1	protein arginine methyltransferase 1	5.7911	0.9488	2.2413	1.4339	1.7973	2.9918	5.3231	3.6956	4.1633	5.3337	7.6761	2.7352	0.3934	1.3615	2.4715	2.7646	7.6751	2.6744	5.1052	0.8136	3.4281	3.3273	0.6007	1.7979	2.1101	1.241	3.1709	1.9063	3.0956	2.583	3.489	0.9923	0.5776	2.6994	2.8534	2.8079	2.5568	2.3426	2.4565	2.8861	2.613	4.378	7.4781	2.6498	3.3981	9.9674	1.6355
5005	ORM2	orosomucoid 2	22.8468	16.022	79.1572	26.9493	8.8373	14.315	26.2467	30.4083	16.7999	6.1743	4.4982	2.3432	13.6841	26.8473	6.0471	3.9485	7.588	2.8672	42.0209	23.9999	88.2231	25.0233	8.0905	11.2832	11.7858	5.5384	35.2031	16.8954	13.1915	8.4319	45.1915	96.4031	13.0108	18.3939	27.6467	12.5013	13.3689	16.7075	10.8422	34.284	62.6071	9.3565	23.827	11.6827	21.5229	9.8881	12.1661
28976	ACAD9	acyl-CoA dehydrogenase family, member 9	1.0059	0.5574	0.3326	1.0943	1.2984	1.6588	0.7277	0.7298	1.2394	1.3799	0.7997	1.2844	0.0061	0.507	0.5269	1.0048	0.5521	0.4264	0.2258	0.268	0.4221	1.0268	0.2611	1.5231	0.4332	0.6052	0.102	0.5729	0.6825	1.0977	0.5986	0.8257	0.2535	0.8379	1.2376	1.0886	0.5689	1.3675	0.4806	1.1713	0.6881	1.1348	1.1773	1.0071	0.6262	0.9325	0.0547
401548	SNX30	sorting nexin family member 30	0.2975	0.4122	0.0316	1.254	0.6399	0.7556	0.2111	0.0493	0.0444	0.7591	0.321	0.5799	0.0043	0.5426	0.1811	0.612	0.6607	0.2857	0.0346	0.0069	0.0848	0.3297	0.0338	0.5078	0.17	0.8287	0.0829	0.4646	0.0782	0.8907	0.1145	0.5091	0.1146	0.5681	0.2079	1.4148	0.1144	0.8061	0.1395	0.3736	0.104	0.3727	0.3285	0.5079	0.1693	0.2803	0.1194
9403	SEP15	15 kDa selenoprotein	0.4969	0.4544	0.4653	0.3539	0.5204	0.366	0.2978	0.5298	0.8751	0.9032	0.3718	0.7009	0.0784	0.4605	0.1076	0	0.0456	0.0408	0.2473	0.1643	0.4032	0.2544	0.114	0	0.2164	0.3034	0.2846	0.394	0.2753	0.6303	0.43	0.5151	0.2379	0.6949	0.3924	0.5026	0.3599	0.6836	0.3637	0.3624	0.604	0.1608	0.1435	0.0783	1.4642	0.7496	0.6236
1459	CSNK2A2	casein kinase 2, alpha prime polypeptide	2.018	0.3178	0.7407	0.2893	1.7203	0.753	0.7177	0.6078	1.39	0.9779	2.441	0.5469	0.0885	0.5024	0.4195	0.8029	0.4694	0.1391	0.2748	0.0852	0.7321	0.7881	0.1096	0.4668	0.4376	0.3178	0.9833	0.8385	0.4401	1.2782	0.7049	0.9502	0.3552	0.9061	0.764	0.7947	0.8385	1.4658	0.8874	0.752	0.5599	0.5606	0.4536	0.3593	0.8992	0.8525	0.4265
5331	PLCB3	phospholipase C, beta 3 (phosphatidylinositol-specific)	0.1261	0.0449	0.0882	0.098	0.087	0.1029	0.0953	0.0888	0.1362	0.1667	0	0.0584	0	0.1556	0.0439	0.0394	0.0598	0.0848	0.0245	0.138	0.1745	0.0942	0.0057	0.0411	0.1102	0.0273	0.0431	0.051	0.0155	0.1458	0.1131	0.0203	0.0121	0.122	0.0814	0.0189	0.0423	0.102	0.0707	0.0642	0.0139	0.0046	0.0831	0.041	0.0336	0.1852	0.0485
23019	CNOT1	CCR4-NOT transcription complex, subunit 1	0.3305	0.0392	0.6237	0.8055	0.3222	0.2119	1.5682	0.4981	0.4208	0.4486	1.2772	0.5295	0.6048	0.6059	0.3691	1.1569	0.3337	0.0473	0.2937	0.1084	0.2099	0.3129	0.024	0.0632	0.205	0.281	0.0522	0.1545	0.0659	0.1771	0.1953	0.1097	0.1147	0.2151	0.3119	0.3305	0.177	0.2739	0.24	0.2447	0.2004	0.0508	0.1986	0.0707	0.1867	0.1353	0.1905
23524	SRRM2	serine/arginine repetitive matrix 2	0.9106	0.0716	0.2252	0.0498	0.1631	0.0431	0.1352	0.0399	0.1797	0.0615	0.0216	0.0131	0.0182	0.0843	0.1126	0.0579	0.0911	0.0625	0.1782	0.0509	0.5962	0.0383	0.128	0.0398	0.2164	0.0937	0.0651	0.0415	0.0852	0.0488	0.0858	0.0412	0.0519	0.057	0.1002	0.0578	0.0786	0.0426	0.0955	0.022	0.115	0.0233	0.1631	0.0545	0.1211	0.7441	0.1194
161291	TMEM30B	transmembrane protein 30B	0.1262	0	0	0	0	0	0	0	0	0	0	0	0	0	0	0	0	0	0	0	0.0512	0	0.022	0	0.0063	0	0	0.0102	0.0104	0.0213	0.014	0.0107	0.006	0	0	0	0.0058	0	0.012	0	0	0	0	0	0	0.014	0
11151	CORO1A	coronin, actin binding protein, 1A	2.8191	0.172	2.3013	0.5832	3.8786	0.4054	2.5125	0.3091	1.5785	1.4006	2.1346	0.5229	1.2417	0.4082	4.2496	0.3232	0.5634	0.1042	0.8694	0.2201	3.774	1.6272	0.3796	1.1684	3.1424	1.1624	0.88	0.7399	0.6991	0.5141	0.8957	0.6529	1.0541	0.9001	2.0057	0.2857	0.7352	0.3744	2.4444	0.3501	0.6806	1.1346	0.7391	0.1318	2.6477	1.0302	3.9397
403	ARL3	ADP-ribosylation factor-like 3	4.4942	4.7757	0.8746	29.8379	2.7595	3.8554	3.6738	18.7766	3.1695	56.3152	2.0091	35.8072	0.7667	50.2752	3.144	14.2601	1.4622	3.3809	3.1015	2.1189	2.4495	20.3327	1.2255	3.0491	1.853	10.8362	2.4794	1.842	3.7011	23.3355	4.3881	4.2874	0.8857	11.7408	4.3526	7.8466	1.6109	3.4939	2.3928	2.7978	6.555	12.1681	4.3362	34.0679	1.6577	15.9318	1.7881
834	CASP1	caspase 1, apoptosis-related cysteine peptidase	5.4927	0.1108	0.4009	0	1.8762	0.0435	1.2847	0.0362	1.0512	0.2146	0.4526	0.104	0.0865	0.0819	0.7775	0.2356	1.1712	0.0776	3.7605	0.0271	0.6828	0.3389	0.0852	0.4663	3.4924	0.0884	0.6383	0	0.3988	0	1.8905	0	0.444	0.13	0.6887	0.1055	0.7609	0.0308	2.225	0.0301	0.8021	0.1985	0.2923	0	0.9052	0.1572	1.3134
6818	SULT1A3	sulfotransferase family, cytosolic, 1A, phenol-preferring, member 3	0.6806	1.2664	0.8471	1.0905	1.0217	0.2869	0.421	1.3427	2.8101	2.6174	0.9699	1.1188	0.1297	1.3516	0.7257	0.6066	0.9399	1.0135	0.4856	0.2046	1.4292	1.0652	0.3338	2.4652	0.5251	0.7739	0.204	1.5374	0.1286	0.96	0.116	0.3149	0.1313	2.1323	0.1715	0.3509	0.2341	0.4072	0.2816	0.5942	3.1975	2.3422	0.8604	1.1946	0.353	2.8583	1.075
867	CBL	Cbl proto-oncogene, E3 ubiquitin protein ligase	0.0364	0	0.0156	0	0.0961	0	0.1558	0.032	0.0221	0	0.0331	0	0.0038	0.0452	0.0444	0	0.0017	0	0.0159	0.0025	0.0456	0.0047	0	0.0046	0.0164	0	0.0131	0	0.0125	0	0.0148	0	0	0	0.1174	0	0.0295	0.0199	0.0135	0.0044	0.0099	0	0.1796	0	0.0353	0.0104	0.022
5360	PLTP	phospholipid transfer protein	0.5919	0.0136	0.0707	0	0.1804	0	0.0469	0.2575	0.4307	0	0.1714	0.1941	0	0	0	0	0.0212	0.0321	0	0.2315	0.1761	0.1088	0	0.1898	0.0182	0.171	0.0254	0.2321	0.0434	0.0122	0.0615	0.0899	0.1265	0.2225	0.0219	0.0881	0.4666	0.0677	0	0.2294	0	0	0.0209	0	2.9121	0.1887	0
26229	B3GAT3	beta-1,3-glucuronyltransferase 3 (glucuronosyltransferase I)	0.1462	0.0434	0.1255	0.0326	0.1007	0.0948	0.1049	0.0941	0.0611	0	0.1097	0.0499	0.0032	0.0648	0.0337	0.0315	0.1684	0.0276	0.0178	0	0.079	0.1087	0	0.0729	0.9009	0.0268	0	0.0509	0.0197	0.3318	0.064	0.0492	0.0429	0.0607	0.0672	0.0525	0	0.0562	0.0264	0.0397	0	0	0.0163	0	0.0783	0.0587	0.0295
6566	SLC16A1	solute carrier family 16 (monocarboxylate transporter), member 1	0.1026	0	0.8165	0.3995	0.6143	0.2507	0.2185	0	0.1242	0.1838	1.2956	0.1756	0.0011	0	0.474	0	0.7479	0	0.6101	0	0.3687	0.088	0.1653	0.2604	0.2534	0.0806	0.135	0.0908	0.082	0.1731	0.2078	0.0823	0.0348	0	0.2901	0.0929	0.0117	0.2036	0.0826	0.0755	0.9708	0.068	0.7833	0.0142	0.0766	0	0.4711
9600	PITPNM1	phosphatidylinositol transfer protein, membrane-associated 1	0.0518	0.0069	0.0919	0.0044	0.1194	0.0233	0.2006	0.1131	0.0384	0.0124	0.1399	0.0364	0.0048	0.0097	0.0907	0.0106	0.0256	0.0063	0.0136	0.0167	0.0114	0.1016	0.0136	0.0236	0.0312	0	0.2331	0.0109	0.0145	0	0	0.0056	0.0166	0.0102	0.0771	0.0047	0.0114	0.0285	0.0217	0.0134	0.043	0.004	0.1844	0	0.024	0.1749	0.0625
130355	C2orf76	chromosome 2 open reading frame 76	0.0565	0	0	0	0.0224	0.0289	0	0.0238	0.082	0.0795	0.0254	0.0348	0	0	0	0	0	0	0	0	0	0.0399	0	0.0229	0.0209	0	0	0.0248	0	0.1148	0.013	0	0.0109	0.0482	0.02	0.0234	0.0087	0.0287	0.027	0.0127	0	0	0	0	0	0.044	0
129563	DIS3L2	DIS3 mitotic control homolog (S. cerevisiae)-like 2	0.0075	0.0358	0.0114	0.0488	0.0508	0.0773	0.0861	0.0489	0	1.1222	0.2944	0.9825	0.0191	0.0587	0.0666	0.0206	0.039	0.0234	0.0057	0	0.0229	0.5144	0.0077	0.0325	0.0171	0.024	0.0989	0.0446	0.0379	0.0923	0.099	0.014	0.0039	0.0289	0.0486	0.048	0.0356	0.0546	0.0167	0.08	0.0725	0.017	0.0413	0.081	0.0934	0	0.0065
53841	CDHR5	cadherin-related family member 5	0.3093	0.4257	0.0657	0.9349	0.0607	0.7623	0.0308	0.1876	0.3353	0.4071	0.0272	0.6014	0.0167	1.3767	0	0.2175	0.2419	0	0.211	0	0.0361	2.2162	0	0.5262	0	0.8541	0.1332	0.5004	0.0424	0.8489	0	0.5381	0.172	0.5434	0.0154	0.6922	0.0074	0.8601	0.0143	0.4257	0	0.1397	0.0042	0.4793	0.0312	0.182	0
23633	KPNA6	karyopherin alpha 6 (importin alpha 7)	0.2916	0.0552	0.3186	0.0524	0.2917	0.0901	0.559	0.0917	0.7317	0.2129	0.6159	0.0602	0.0032	0.063	0.1853	0.0995	0.0587	0.0706	0.102	0.0235	0.1505	0.0498	0.0386	0.0583	0.1179	0.0697	0.1685	0.0428	0.1927	0.0655	0.204	0.0762	0.0778	0.0927	0.1431	0.083	0.1827	0.1014	0.188	0.116	0.0848	0	0.3015	0.038	0.2078	0.1083	0.0392
9615	GDA	guanine deaminase	2.5448	19.1282	7.3588	29.0756	6.2446	25.6068	0.5773	2.4815	3.167	32.4127	3.8059	18.6353	1.5094	16.8695	2.2083	7.4484	3.556	0.0273	2.5169	0.0021	5.2315	17.9376	0.9775	8.9256	3.6108	10.821	1.4386	6.0201	2.0246	12.6474	0.6782	17.0821	0.3288	5.8364	5.7424	9.358	2.8162	12.5396	2.734	6.0346	1.5997	6.3548	2.4179	12.9186	0.0854	2.6181	1.163
9968	MED12	mediator complex subunit 12	0.0193	0	0.0079	0	0.0507	0	0.216	0	0	0	0	0	0	0	0	0	0	0	0.0074	0	0	0	0.0039	0	0.0084	0	0	0	0	0	0	0	0	0	0	0	0	0	0	0	0	0	0	0	0	0	0.0005
85461	TANC1	tetratricopeptide repeat, ankyrin repeat and coiled-coil containing 1	0.0027	0.009	0.1015	0.0143	0.0036	0.005	0.1367	0.0405	0.0206	0.019	0.0119	0.009	0	0.0103	0.2581	0.0093	0.0031	0.0144	0.0045	0.0028	0.0198	0.01	0.0037	0.0072	0.0187	0.0093	0.0053	0.0092	0	0.0809	0.0255	0.0042	0.001	0.0588	0.0047	0.0758	0.0093	0.0093	0.0246	0	0	0.005	0.0083	0.0029	0.0195	0.017	0.002
9535	GMFG	glia maturation factor, gamma	0.6398	0.0545	1.4349	0.4951	3.2368	0.878	0.3706	0.4481	0.6691	1.4005	0.2439	0.6046	0.0348	0.4275	0.3005	0	0.1729	0.1184	0.7772	0.1797	1.2288	1.2741	0.2298	0	0.9591	0.0544	0.0271	0.3695	0.3287	2.1835	0.5891	0	1.886	1.2033	0.3735	0.2003	1.2759	0.162	0.5168	0.4267	1.1605	0.0336	0.156	0.0103	0.0168	0.0189	1.1961
22800	RRAS2	related RAS viral (r-ras) oncogene homolog 2	1.1154	2.0216	1.0537	4.3944	1.795	3.6643	1.2582	2.1354	1.6103	5.0056	0.4906	2.6897	0.228	3.3881	0.7478	2.788	0.6477	0.3923	0.5837	0.6907	0.7536	3.8743	0.4443	3.0263	1.2168	2.4798	1.6866	3.3643	0.6692	3.149	1.198	3.2078	0.8302	4.7499	1.5326	3.8392	1.8089	6.54	1.436	3.0847	1.8435	1.9365	1.539	2.771	0.7413	2.5233	0.9227
347862	PDDC1	Parkinson disease 7 domain containing 1	0.6569	1.1954	0.9479	1.5018	1.4122	1.1905	1.7981	1.112	1.0893	1.5702	0.3313	0.8871	0.101	1.4948	0.8883	1.3672	0.8514	0.1891	0.1878	0.0688	0.2264	0.895	0.0853	0.4854	0.3438	1.0244	0.2859	0.7362	0.3448	1.8444	0.7827	1.6391	0.4592	1.9137	1.2854	0.9193	0.4939	1.635	0.7822	1.1075	0.6389	0.2221	0.4832	0.6522	1.3123	0.2959	0.3772
5267	SERPINA4	serpin peptidase inhibitor, clade A (alpha-1 antiproteinase, antitrypsin), member 4	1.6928	4.391	0.8063	0.2148	3.0151	8.0333	0.8503	2.5773	0.4771	0.1721	0	0.1689	0.249	0.8567	1.9829	0.5374	0.777	0.5434	0.4454	0.6161	1.8208	0.8999	0.1449	0.4145	0.9753	0.3693	2.8742	0.9787	2.8128	0.9304	1.7455	2.226	5.4365	4.1573	2.164	4.8432	4.4558	6.4564	4.2134	10.5227	1.4933	1.4362	0.8083	0.446	2.1894	1.0902	0.9387
10105	PPIF	peptidylprolyl isomerase F	0.7037	1.9605	0.6423	3.992	0.8991	3.1831	0.6704	1.6993	0	1.9225	0.1305	4.5202	0.1564	4.0256	0.3535	4.7846	1.053	2.9369	0.4614	3.0468	0	4.4548	0.0547	3.9102	0.0129	2.2969	0.3152	2.1806	0.1083	4.6645	0.1918	3.5195	0.2245	3.087	0.6031	3.01	0.1744	3.6131	0.1743	1.0794	0.8113	3.7243	0.1636	1.6244	0.6337	2.8854	0.3536
55773	TBC1D23	TBC1 domain family, member 23	0.6085	0.1139	0	0.0924	0.478	0.7147	0.3242	0.0932	0.2327	0.0733	0.0479	0.2222	0.0033	0.1693	0.0306	0.0626	0.1162	0.0099	0.0326	0	0	0.0231	0.0062	0.0189	0.0155	0.0349	0.1132	0.0598	0.0585	0.2678	0.2206	0.2284	0.0082	0.0151	0.0372	0.0565	0.0599	0.0878	0.0779	0.0328	0.3437	0.024	0.1264	0.0916	0.0302	0.1067	0.1092
22984	PDCD11	programmed cell death 11	0.2894	0.0067	0.321	0.0026	0.0731	0.0289	0.2412	0.0356	0.1663	0.0385	0.1806	0.0242	0.0145	0.0714	0.0197	0.4407	0.0156	0.0134	0.0503	0.0009	0.1919	0.267	0.0453	0.004	0.0439	0.0185	0.0152	0.0426	0.0595	0.0302	0.0734	0.0114	0.0425	0.2656	0.1455	0.0057	0.0282	0.0538	0.0344	0.0092	0.1262	0	0.0375	0.0056	0.1254	0.1469	0.0359
126308	MOB3A	MOB kinase activator 3A	0	0	0.2552	0	0	0	0	0	0	0	0	0	0.0166	0	0	0	0.0958	0.0391	0	0	0	0	0	0	0	0	0.0465	0	0	0	0	0	0	0	0	0	0.0801	0	0	0	0.0829	0	0	0	0	0.0195	0.0283
11313	LYPLA2	lysophospholipase II	0.5353	1.5137	0.5845	1.2879	2.1976	2.5268	1.9786	1.6317	3.6722	3.6029	1.0301	3.1017	0.1309	1.2157	0.4096	10.0631	0.7318	0.443	0.8132	0.8322	1.3712	2.8831	0.2003	2.0852	1.0916	1.2458	0.9491	2.3422	0.8239	3.4389	1.0882	2.0409	0.7506	3.4423	1.8808	3.1104	1.4348	2.2807	2.9619	1.9689	2.1386	0.5148	1.6424	2.3033	0.4963	3.0967	0.4442
5824	PEX19	peroxisomal biogenesis factor 19	0	0.1207	0.028	0.1573	1.1055	0.3884	0.1568	0.1148	0.087	0.4264	0	0.6006	0.0174	0.2836	0.0986	0.2149	0.04	0.0168	0.0667	0	0.1693	0.3758	0.0028	0.2236	0.059	0.1501	0.0077	0.1277	0.0588	0.3712	0.1033	0.1966	0.0657	0.3106	0.4194	0.2457	0.1298	0.3177	0.3403	0.2416	0.9711	0.2633	0.3137	0.1566	0.2157	0.0809	0.3202
23479	ISCU	iron-sulfur cluster scaffold homolog (E. coli)	0.1802	0.4524	0.1265	0.6092	1.565	0.726	0.076	0.6247	0.5516	0.3391	0.2973	0.1779	0.0298	0.9018	0.2706	1.4056	0.1878	0.2075	0.0989	0.1433	0.2319	2.4637	1.5948	1.2935	2.0346	1.8073	0.1009	0.7102	0.1238	0.796	0.2968	0.9481	0.1176	0.9853	0.1726	0.7756	0.143	0.5747	0.0845	0.5148	1.0322	0.6414	0.196	0.4233	0.1115	0.5218	0.1642
7342	UBP1	upstream binding protein 1 (LBP-1a)	0.0284	0.0066	0.0361	0	0.051	0.1147	0	0.0094	0.277	0.1163	0.0499	0.0213	0	0.0115	0.0571	0	0.0161	0.0101	0	0	0.0785	0.0198	0.0078	0.0381	0.0125	0.0192	0.3822	0.2947	0.4639	0.2655	0.5258	0.475	0.4623	0.1496	0.4547	0.1434	0.3096	0.0606	0.4385	0.3369	0	0	0.0254	0	0.0322	0.0985	0.0436
230	ALDOC	aldolase C, fructose-bisphosphate	15.4368	0.6501	9.8201	1.8199	17.9474	2.3728	49.3388	2.4092	24.4977	3.484	44.6134	2.6315	1.8744	1.2752	6.6557	1.6769	12.7584	1.6491	7.3395	1.1206	8.465	1.9845	2.4325	1.0454	9.0337	0.7495	6.0963	1.2724	10.1495	2.1854	10.331	1.2912	6.0253	2.7976	18.9013	1.1638	5.7751	1.6615	28.9066	1.801	13.9893	1.1628	60.9609	1.0358	18.6712	3.7622	8.9704
6418	SET	SET nuclear oncogene	39.2975	4.929	5.5192	10.8772	4.4152	3.0467	14.6294	5.9427	4.9535	4.5328	11.9774	7.2552	3.145	9.4399	9.0193	3.7155	6.3502	4.1054	8.756	2.976	25.5356	15.5178	6.8444	8.1329	14.893	5.7219	4.9816	5.5069	6.6923	5.3566	5.1555	4.2684	2.1541	6.3384	3.0482	4.1857	5.6247	3.2752	2.8616	4.2264	19.3119	0.6186	37.1317	5.2493	14.285	16.7676	7.8225
3842	TNPO1	transportin 1	0.8974	0.4111	0.6166	0.4325	1.4863	0.9847	1.2635	1.7673	1.6819	0.8358	1.3253	0.7992	0.1241	0.741	0.5856	0.8262	0.378	0.3158	0.4055	0.3321	0.9449	0.8187	0.1734	0.6419	0.5527	0.364	0.4503	0.4708	0.7084	1.0254	0.7797	0.8405	0.3416	1.0621	1.0576	0.6326	0.6501	0.9263	0.8835	0.8802	0.5933	0.2828	0.7014	0.5382	0.5232	0.9688	0.3292
23095	KIF1B	kinesin family member 1B	0.0671	0.0085	0.074	0.2056	0.0469	0.0881	0.094	0.0231	0.14	0.0157	0.074	0.0143	0.005	0.0044	0.0206	0.023	0.0135	0.0211	0.0584	0.0129	0.1017	0.0665	0.4488	0.0296	0.0293	0.011	0.0228	0.0149	0.0348	0.0693	0.0194	0.0334	0.0151	0.0528	0.0666	0.1092	0.0701	0.0756	0.0229	0.3248	0.0153	0	0.3981	0.0072	0.0273	0.0138	0.0047
858	CAV2	caveolin 2	1.7641	0	2.877	0	1.7833	0	0.1456	0.9629	8.3967	1.2162	3.1752	0.0745	0.2695	0	0.1206	0	0.15	0	0.3245	0.085	0.6941	0	0.0089	0	0.7127	0	0.5477	0.1054	1.5262	0	0.8978	0.0398	0.2462	0.1827	0.3497	0.0761	0.1039	0	0.9491	0.1229	0.0631	0	3.8226	0.0904	0.0705	1.0099	0.0373
8332	HIST1H2AL	histone cluster 1, H2al	60.8945	2.1196	59.7376	52.0411	33.9729	81.599	9.0459	35.7969	7.6586	8.407	100.666	11.8086	3.6984	10.6937	98.8346	8.813	51.3166	2.8698	130.204	44.6564	126.815	70.2687	87.0126	52.7844	143.066	62.8718	45.1866	27.9603	34.3806	35.1594	37.664	9.5477	27.3936	84.2306	18.3501	33.655	12.146	10.6695	20.2746	30.8231	101.513	0.6318	153.471	4.7771	10.0935	13.7447	5.7597
94121	SYTL4	synaptotagmin-like 4	0.114	0	0.0037	0	0	0	0.0054	0.0927	0	0	0	0.0038	0.0058	0	0	0	0	0.0118	0	0.0116	0	0	0	0	0	0	0.0422	0	0	0	0.0034	0.0265	0	0	0.0199	0	0	0	0	0	0	0	0	0	0	0.0652	0
8659	ALDH4A1	aldehyde dehydrogenase 4 family, member A1	2.8551	49.0745	1.8091	173.204	8.5963	156.07	6.7707	24.9393	16.5656	146.592	12.2383	121.726	0.0747	81.2725	5.4194	95.5401	3.344	2.3142	0.6663	1.1936	3.3139	188.118	0.824	184.909	1.8505	121.294	0.4841	38.938	1.1899	137.458	1.488	164.172	0.4769	19.5234	3.0741	122.164	0.5488	109.982	2.3674	36.3691	25.7954	47.9187	2.8506	93.6914	1.8999	24.504	0.4059
55072	RNF31	ring finger protein 31	0.0073	0.0198	0.1255	0.0142	0.0045	1.13	0.0227	0.2168	0.0105	0.0287	0.0075	0.0176	0.0026	0.0273	0.1841	0.4913	0.0247	0.1435	0.0072	0.0051	0.0201	0.1108	0.0031	0.0126	0.0083	0.0122	0.0021	0.0153	0.0048	0	0.011	0	0.0348	0.0758	0.016	0.0109	0.0217	0.0344	0.0211	0.0126	0.0111	0	0.0676	0.0107	0.0146	0.0138	0.0132
8417	STX7	syntaxin 7	3.0789	3.7361	3.3467	8.5974	2.8777	4.9958	3.7375	2.6781	3.3448	8.8151	2.4721	4.8556	1.0348	6.5462	4.0596	10.6862	5.2594	1.1451	1.3081	0.492	2.5922	5.0233	1.2114	2.8949	1.1634	2.9451	1.6699	3.3023	2.0393	6.3569	2.147	5.2602	1.4313	4.5709	3.5402	5.7152	2.4357	6.5	2.6753	4.4216	3.5653	2.7547	1.9537	3.5927	2.8181	4.1048	1.0334
26007	DAK	dihydroxyacetone kinase 2 homolog (S. cerevisiae)	4.0013	26.4847	1.7277	57.3977	0.9862	34.5624	1.6398	19.623	4.162	53.0833	0.635	20.7473	0.9248	58.3225	2.8993	64.5724	1.8756	2.0077	0.849	1.1231	3.5908	70.7539	1.5041	51.8993	2.6956	26.6898	1.1811	51.697	2.8845	114.688	3.5676	56.4684	2.1916	49.4601	6.0448	59.7278	3.2943	57.0245	4.0924	26.8634	15.9607	21.0446	3.8835	59.0149	2.8959	23.5801	2.1076
57037	ANKMY2	ankyrin repeat and MYND domain containing 2	0.4021	0.0262	0.0637	0.0736	0.1103	0.1085	0.0436	0.0224	0.1031	0.0491	0.0762	0.0906	0	0	0.0609	0.1846	0.0577	0	0.0083	0	0.0828	0.1058	0.0022	0.2072	0.0826	0.0146	0.0158	0	0.0084	0.0842	0	0.0849	0.0218	0.0446	0.1003	0.0125	0.0416	0.067	0.0376	0.0127	0.1779	0	0.1989	0.0325	0.0577	0.0216	0
1981	EIF4G1	eukaryotic translation initiation factor 4 gamma, 1	0.9371	0.314	0.3326	0.4019	0.8914	0.5605	1.2243	0.4408	1.224	0.9305	0.1184	0.4591	0.0251	0.5791	0.3583	0.4184	0.2743	0.2152	0.3632	0.3114	0.4149	0.7557	0.0942	0.3449	0.3936	2.1106	0.4072	0.4157	0.3187	0.8508	0.5036	0.6739	0.1825	0.4233	0.8587	0.4567	0.5891	0.3748	0.5038	0.2663	1.1023	0.3982	0.8698	0.637	0.3338	0.6086	0.241
64087	MCCC2	methylcrotonoyl-CoA carboxylase 2 (beta)	3.4273	12.0653	1.6094	23.2482	8.1315	18.684	5.0373	17.3767	4.7222	9.9294	8.7117	22.0532	0.3838	31.1766	2.2345	32.4119	2.9547	5.0453	0.8838	3.7652	8.1585	18.8351	0.5299	22.1945	1.2838	16.2065	0.9096	23.4788	2.7245	31.8184	6.9642	23.7685	0.6706	16.1533	5.1553	19.0679	1.0375	24.5047	2.144	9.8983	4.5871	11.4935	1.938	11.3988	2.436	9.5754	0.4088
8741	TNFSF13	tumor necrosis factor (ligand) superfamily, member 13	0.0277	0.0277	0	0	0	0	0	0.073	0.0493	0.0436	0	0.0303	0	0.0436	0	0	0	0.0099	0	0.0073	0	0.0189	0	0	0	0.0086	0	0.0224	0	0.0755	0	0.0263	0	0.1945	0.0181	0.0229	0	0.0807	0	0.043	0	0	0	0	0	0.1193	0
64779	MTHFSD	methenyltetrahydrofolate synthetase domain containing	0.024	0	0	0	0	0	0	0.0201	0	0	0	0	0	0	0	0.1509	0	0	0	0	0	0	0	0.0228	0	0	0.3046	0	0.2648	0.5741	0	0	0.1415	0	0	0	0.5516	0	1.0368	0	0	0	0	0	0	0	0
998	CDC42	cell division cycle 42	7.9529	3.2532	3.3729	5.6933	4.698	5.9834	9.6259	5.7749	27.0136	21.684	4.0682	4.4456	1.0734	6.4031	9.789	5.4572	3.1888	1.6729	2.662	1.6523	4.5749	6.0482	1.3519	6.3077	4.3785	3.7246	4.2971	5.0281	4.1132	6.3054	5.477	5.2593	3.3714	5.2941	5.0817	4.1127	5.4455	5.4042	5.7959	3.1249	3.7372	2.3263	5.5901	5.2822	4.9291	4.7906	2.2801
113174	SAAL1	serum amyloid A-like 1	0.0118	0	0.0028	0	0.015	0	0	0.007	0.0196	0	0	0.0055	0	0	0	0	0	0	0	0	0.006	0	0.0022	0	0.0044	0	0.0075	0	0.0038	0.0044	0.0072	0	0	0.0046	0.016	0	0.0054	0	0	0	0	0	0.0075	0	0.0068	0	0.0045
2633	GBP1	guanylate binding protein 1, interferon-inducible	2.0235	0.146	0.3894	0.1663	3.3099	0.3629	5.3744	0.301	1.0494	0.8157	2.0067	0.2182	0.2678	0.0687	1.0265	0.2352	0.9089	0.0654	0.7227	0.1948	3.9501	1.1398	0.7787	0.5649	1.5856	0.7859	1.0791	0.1457	0.9031	0.2605	0.7413	0.1089	1.59	0.3378	2.3255	0.1362	0.7418	0.2777	1.3772	0.0537	0.5888	0.0229	0.984	0.1488	2.6415	0.1891	5.7344
7372	UMPS	uridine monophosphate synthetase	1.6959	1.1691	0.263	0.6804	1.9647	0.8388	1.738	0.7769	1.2761	0.3887	2.4887	1.0176	0.0296	0.7813	0.472	0.4426	0.2853	0.2121	0.3202	0.0493	0.7574	1.1611	0.9521	0.5866	0.8069	0.3463	0.1521	0.6031	0.153	0.7572	0.432	0.5794	0.1587	0.4186	1.107	1.0357	0.44	0.1535	0.2708	0.2422	1.6493	0.3534	2.1924	0.7809	0.5038	0.4926	0.2765
1289	COL5A1	collagen, type V, alpha 1	0.0122	0	0.0488	0	0.0986	0.0201	0.0181	0.0046	0.1636	0.1841	0.079	0.0249	0	0	0.027	0.0048	0.0014	0.0039	0	0	0.1325	0.0646	0.0047	0	0.0807	0	0	0	0	0	0.0659	0	0.1121	0.0329	0.0511	0.0411	0.0273	0	0.0173	0	0.1912	0.0033	0.0272	0.0085	0	0.0155	0.0162
10621	POLR3F	polymerase (RNA) III (DNA directed) polypeptide F, 39 kDa	0.1334	0.0073	0	0	0.0408	0.0215	0.0324	0.017	0.045	0.0345	0.0255	0.0161	0	0.0479	0.0139	0.006	0.0126	0	0	0	0.017	0.0205	0	0.0131	0	0.0123	0	0.0138	0	0.0283	0.0137	0	0.0307	0.0327	0.0613	0	0	0	0	0	0.0143	0	0.0876	0.01	0.0143	0.0281	0.0099
472	ATM	ataxia telangiectasia mutated	0.3276	0.0049	0.0687	0	0.3186	0.0022	0.2835	0.0513	0.0847	0.2518	0.5421	0.3451	0.0055	0.0091	0.0652	0.0301	0.124	0.0041	0.017	0.0154	0.1921	0.0182	0.0405	0.0034	0.1924	0.0027	0.0699	0.0151	0.1122	0.0099	0.0815	0.0017	0.088	0.011	0.0738	0.2197	0.1077	0.0097	0.1628	0.1998	0.0578	0.0191	0.3225	0.0204	0.0553	0.0292	0.1324
51663	ZFR	zinc finger RNA binding protein	0.4055	0.0129	0.4234	0	0.7368	0.0672	0.9328	2.9712	0.3539	0.4406	0.2629	0.3566	0.1534	1.239	0.7392	0.6558	0.0794	0.0233	0.2139	0.0972	0.3173	1.3082	0.0324	1.3558	0.2027	0.0133	0.4008	0.4464	0.3928	0.1397	0.6931	0.3488	0.0474	0.2127	0.1854	0.0431	3.6678	0.1407	3.6829	0.0653	0.1894	0.436	0.2314	0.2511	0.3355	0.3775	0.1852
10052	GJC1	gap junction protein, gamma 1, 45kDa	0.1686	0	0	0	0	0	0	0	0	0	0	0	0	0	0	0	0	0	0	0	0	0	0	0	0	0.057	0	0	0	0	0	0	0	0	0	0	0	0	0	0	0	0	0	0	0	0	0
100287404	USP17L19	ubiquitin specific peptidase 17-like family member 19	0.0046	0	0	0	0	0	0	0	0	0	0	0	0	0	0	0	0	0	0	0	0	0	0	0	0	0	0	0.0116	0	0	0	0	0	0	0	0	0	0	0	0	0	0	0	0	0	0	0
25994	HIGD1A	HIG1 hypoxia inducible domain family, member 1A	0.1708	0.2599	0	0.3531	0.1106	0.3275	0	0.257	0.2273	0.5173	0.8691	0.6256	0	0.5929	0.062	0.214	0	0.1281	0	0.0088	0	0.2201	0	0.3785	0	0	0	0.1523	0	0.1732	0	0.4584	0	0	0	0.2648	0	0.5189	0	0.2508	0.238	0.3184	0	0.338	0.0502	0.4746	0
2339	FNTA	farnesyltransferase, CAAX box, alpha	1.4447	0.2819	0.6318	0.4931	1.1103	1.2381	2.5059	0.6358	1.9891	2.3262	1.82	1.0477	0.055	0.4842	0.5801	0.4499	2.5183	0.2922	0.14	0.1554	2.0208	1.1917	0.1273	0.5861	0.9394	0.4601	0.35	0.7116	0.4697	0.862	2.0577	0.7175	0.2593	0.9298	1.3972	0.6241	0.8294	1.4809	0.8086	0.755	3.277	0.0885	1.6985	0.8924	1.2516	3.6844	1.3407
55276	PGM2	phosphoglucomutase 2	4.5687	0.7512	2.5318	2.0099	2.9583	2.1668	3.1655	1.3014	2.2937	2.6007	3.3652	1.8646	0.3963	1.6024	2.9067	1.6573	0.886	0.4799	0.9744	0.3645	1.9387	1.8747	0.5505	2.1924	1.3069	0.9633	1.3347	1.0616	1.4202	1.5344	3.3749	1.5464	1.1538	1.8859	3.9244	1.2639	2.9126	1.8762	3.9368	1.0378	1.3279	0.8932	1.0528	0.5837	4.3063	1.7841	2.3434
57504	MTA3	metastasis associated 1 family, member 3	0.0235	0.1174	0.1366	0.129	0.1832	0.1098	0.2719	0.1886	0.3195	0.3351	0.0767	0.0983	0.0051	0.2127	0.2484	0.3204	0.1767	0.0115	0.2295	0.0996	0.1428	0.1518	0.0457	0.083	0.1114	0	0.1039	0.1775	0.5363	0.1036	0.2376	0.0956	0.0463	0.4757	0.1063	0.0442	0.0823	0.0697	0.256	0.034	0.1067	0.0063	0.2353	0.0668	0	0.3684	0.3638
673	BRAF	v-raf murine sarcoma viral oncogene homolog B	0.1801	0.0279	0.0381	0.0396	0.1037	0.0448	0.0389	0.0222	0.0407	0.0421	0.1278	0.0205	0	0.0137	0.0331	0.0675	0.0265	0.0165	0.0039	0.0078	0.0475	0.0085	0.2304	0.0303	0.0616	0.0249	0.0068	0.0223	0.0481	0.0397	0.0431	0.0201	0.0338	0.021	0.0245	0.051	0.0244	0.0144	0.0208	0.0147	0.0406	0.0047	0.0443	0.0286	0.0769	0.0395	0.013
27243	CHMP2A	charged multivesicular body protein 2A	1.2956	0.0569	0	0.2491	0.311	0.1445	0.1357	0.0925	0.1947	0.1103	0.1986	0.1086	0.3278	0.0359	0	0.168	0.4275	0	0.4068	0.0475	0.0728	0.4382	0.0562	0.7546	0.1827	0.255	0.7474	0.1686	0.0993	0.1463	0.0312	0.1971	0.1494	0.3826	0.9688	0.03	0.1944	0.1837	0.1575	0.2295	0.846	0	0.0833	0.0842	0	0.0756	0.1114
5037	PEBP1	phosphatidylethanolamine binding protein 1	132.964	380.863	111.135	796.142	226.043	530.772	146.365	465.534	321.512	704.623	718.002	869.665	28.5392	771.167	235.42	1186.06	234.241	546.267	112.807	182.335	212.261	732.36	68.5835	550.529	185.484	444.184	116.902	492.47	172.359	1193.72	292.803	408.586	123.834	858.144	251.063	651.929	135.557	601.582	260.952	389.771	256.707	121.718	516.649	772.961	36.4743	925.701	97.5659
51018	RRP15	ribosomal RNA processing 15 homolog (S. cerevisiae)	0.0616	0	0.0241	0.0119	0.0504	0	0.0423	0	0.0708	0	0	0	0	0.0193	0.0126	0	0.0429	0.0074	0.0371	0	0	0.0138	0	0	0	0	0	0	0.0111	0	0.0207	0	0.0201	0	0.0223	0	0	0	0.0652	0	0.0643	0	0.0521	0	0.0456	0.0092	0
143244	EIF5AL1	eukaryotic translation initiation factor 5A-like 1	14.3326	3.8091	8.4332	15.5021	8.5434	7.2169	20.835	15.815	36.2405	29.0572	31.4487	17.7867	1.321	28.4392	8.6895	19.1045	11.7952	4.212	2.9152	0.9839	7.2047	6.556	0.5123	7.5907	4.1669	2.0364	5.1265	5.6687	3.3885	11.0787	9.3406	6.2707	2.1069	13.9291	5.157	5.454	3.0743	5.2737	5.336	4.7944	17.1114	2.0863	38.7206	15.3847	1.402	16.2072	3.4462
23299	BICD2	bicaudal D homolog 2 (Drosophila)	1.1819	0	0.0113	0	0.3437	0.0093	0.1667	0.0244	0.0501	0.0115	0.1113	0.0038	0	0.0038	0.0849	0	0.2939	0	0.0146	0.0033	0.0071	0.1088	0.1493	0	0.7731	0	0	0.0205	0.0057	0.0151	0.3359	0	0.1562	0.1007	0.0348	0	0.0299	0	0.9165	0.0201	1.4774	0.012	0.0531	0	0.0812	3.8228	0.2093
9046	DOK2	docking protein 2, 56kDa	0	0	0	0	5.3012	0	0.1114	0	0.1142	0.076	0.1749	0	0	0	0.0327	0	0	0	0.059	0	0	0	0	0	0.0375	0	0	0	0	0	0	0	0.0143	0	2.013	0	0	0	0.1486	0	0.0103	0	0	0	0.1694	0	0.0768
5165	PDK3	pyruvate dehydrogenase kinase, isozyme 3	0.3656	2.7576	2.0093	5.2765	1.9968	0.8505	1.8609	0.9851	2.1796	1.2973	3.9351	1.1341	0.0143	2.9714	0.2827	3.2949	0.5963	0.5794	0.3446	0.2303	0.5288	3.0893	0.2167	1.8244	0.2401	2.2469	1.7723	0.9201	0.5918	2.6176	0.9392	1.1967	0.1327	1.2406	1.6912	4.1444	0.2081	3.0291	0.4881	0.5958	2.2373	0.7789	2.6951	3.7369	0.828	0.7193	0.2484
129285	PPP1R21	protein phosphatase 1, regulatory subunit 21	0.5362	0.2179	0.0609	0.3751	0.3539	0.5251	0.3171	0.4631	0.1621	0.6042	0.1023	0.5031	0.0071	0.707	0.0983	0.3442	0.1147	0.0347	0.1241	0.023	0.0947	0.5213	0.0208	0.3189	0.1488	0.3863	0.2563	0.3232	0.0702	0.6472	0.3493	0.7499	0.2011	0.3945	0.3001	0.4022	0.2683	0.4223	0.3828	0.2878	0.1184	0.1809	0.3416	0.1366	0.1576	0.1337	0.1131
151188	ARL6IP6	ADP-ribosylation-like factor 6 interacting protein 6	0	0.0792	0.1021	0.0399	0	0	0.1978	0	0.1494	0.1913	0	0.0444	0	0.0402	0.3389	0.2708	0.1464	0.1349	0.8603	0	0.205	0.0633	0	0.1115	0.0596	0	0.0474	0.0255	0	0	0.0845	0	0.0379	0	0.0444	0	0	0.0142	0	0.0367	0.1907	0.0455	0.6374	0.0627	0.7766	0.0555	0
54477	PLEKHA5	pleckstrin homology domain containing, family A member 5	0.529	0.7376	0.2411	0.7889	0.9631	0.4978	0.3224	0.1638	0.618	0.859	0.4232	1.0006	0.0359	0.6613	0.3125	0.6943	0.2761	0.14	0.1617	0.0597	1.0983	0.9037	0.0878	0.8146	0.3542	0.5905	0.3037	0.5699	0.2531	0.6418	0.4464	2.4617	0.1097	2.1768	0.3055	1.5858	0.4898	2.2427	0.5046	1.2362	0.3767	0.3878	0.3491	0.9251	0.0252	0.3977	0.0603
4125	MAN2B1	mannosidase, alpha, class 2B, member 1	0.1536	0.1987	0.1974	0.1564	0.6424	0.2545	0.1919	0.1663	0.7292	1.1983	0.2722	0.7629	0.0014	0.2501	0.1225	0.6291	0.1832	0.115	0.0388	0.0188	0.2501	1.0003	0.0288	0.3741	0.1133	0.2499	0.0568	0.2814	0.0611	0.5315	0.2051	0.2772	0.0744	0.5288	0.0916	0.6013	0.129	0.3762	0.1526	0.2929	0.084	0.1924	0.2288	0.3088	0.1058	0.2352	0.0695
29104	N6AMT1	N-6 adenine-specific DNA methyltransferase 1 (putative)	0.7839	0	0.0234	0.0204	0.2067	0	0.0455	0	0.1667	0.0646	0.2039	0.0422	0.0071	0.019	0	0	0	0	0	0	0	0.0173	0.0139	0	0	0	0.057	0	0.0393	0.2671	0	0	0.0126	0.012	0	0.0374	0.0409	0.0387	0	0.0206	0	0	0.025	0	0	0	0
7373	COL14A1	collagen, type XIV, alpha 1	2.5888	4.605	4.8415	14.0442	8.2055	5.6902	7.0284	30.0722	9.6014	57.4074	0.9025	3.3142	0.8226	7.081	2.5719	7.5923	4.8298	5.4962	3.4003	7.9029	7.2301	7.3112	0.8571	9.7435	17.1808	4.4444	6.3052	18.3394	1.1738	5.1973	6.1312	6.6461	1.732	33.7007	3.4628	4.7535	5.71	13.6575	3.9423	2.6329	2.7355	1.7912	2.4902	1.8701	0.5395	30.602	1.1629
25979	DHRS7B	dehydrogenase/reductase (SDR family) member 7B	0.5656	0.3421	0.2354	0.598	0.1251	0.5636	0.7989	0.8811	0.4266	0.3787	0.5432	0.5356	0.0895	0.7248	0.2274	0.389	0.4606	0.2452	0.1228	0.1583	0.1301	0.7119	0.0901	0.8418	0.212	0.3431	0.1151	0.335	0.0334	0.5196	0.0777	0.4416	0.1192	0.6095	0.0278	0.2789	0.1132	0.5169	0.1366	0.3086	0.0441	0.2554	0.1505	0.6557	0.2315	0.7928	0.5647
83604	TMEM47	transmembrane protein 47	0.9551	0	0	0.077	0	0	0	0	0	0	0	0	0	0	0	0	0	0	4.8725	0	1.6407	3.6906	0	0.108	0.1829	0	0.0508	0	0	0	0	0	0	0	0	0	0	0	0	0	0	0	0	0	0	0	0
178	AGL	amylo-alpha-1, 6-glucosidase, 4-alpha-glucanotransferase	1.7751	0.2485	1.1713	0.436	1.4393	0.7783	2.4595	0.7631	1.5223	1.1191	2.9289	0.6741	0.2942	0.6903	1.0599	0.5687	1.1406	0.2606	0.9823	0.1293	1.6689	0.8703	0.1642	1.0409	1.567	0.6348	1.0305	0.4259	2	0.7085	1.659	0.5975	0.6329	0.5247	3.8975	0.4537	0.6754	0.2434	2.5415	0.2817	1.142	0.3253	3.3734	0.5614	4.1009	0.6248	0.8422
11142	PKIG	protein kinase (cAMP-dependent, catalytic) inhibitor gamma	1.3906	0	0	0	0	0	0.2019	0	0	0	0	0	0	0	0	0	0	0	0	0.0412	0.0845	0	0	0	0	0	0	0	0	0	0	0	0.1435	0.1885	0	0	0	0	0.185	0.1437	1.8041	0	0	0.0513	0.1419	0.3156	0
79763	ISOC2	isochorismatase domain containing 2	4.5235	20.9312	4.5502	24.0739	267.42	44.2993	7.1904	18.4548	115.086	20.6952	33.8541	20.3109	0.7561	48.7998	3.0916	45.1935	5.3291	2.8184	1.4019	0.8263	3.8904	31.7539	0.6734	24.0881	3.0636	21.4926	1.886	21.6545	8.0278	66.9628	10.9984	83.0112	4.4558	45.8935	17.4461	62.0734	3.8639	95.8606	20.4668	19.5222	8.8152	12.7246	23.7974	41.8411	12.763	24.0483	2.6295
27339	PRPF19	pre-mRNA processing factor 19	1.6296	0.5583	4.9223	1.7165	2.2665	1.3362	1.6701	2.0695	1.588	4.7725	2.1911	1.3365	0.314	1.3205	1.6824	1.6301	2.1391	1.0566	1.1249	0.6164	7.1083	2.2478	0.6215	0.8979	1.5762	2.2848	1.7957	1.6127	1.9577	2.3101	1.9166	0.9868	1.2269	2.2148	1.7494	1.369	1.1237	2.0026	1.5722	1.616	2.6515	0.6455	2.0496	4.5659	1.2941	3.7641	1.1211
10579	TACC2	transforming, acidic coiled-coil containing protein 2	0.0778	0.0103	0	0	0.0081	0.0038	0	0.0231	0.0093	0.0257	0	0.0259	0.0019	0.014	0.0167	0.0029	0.0092	0.0098	0.0104	0.0389	0.0051	0	0.0011	0	0.0241	0.0159	0	0.0116	0	0.0201	0.0184	0.0267	0	0.0072	0	0	0.0068	0.4573	0.0027	0.2282	0.2544	0.0095	0.0027	0.0528	0.0318	0.0399	0.0076
170954	PPP1R18	protein phosphatase 1, regulatory subunit 18	0.8968	0.0071	0.0847	0	0.1244	0	0.0614	0	0.0713	0.0254	0	0	0.0076	0	0.078	0	0	0	0	0.0041	0.0621	0	0.0636	0	0.0542	0	0.7059	0	0.0428	0	0.0526	0	0.0331	0	0.0581	0	0.01	0	1.0024	0	0	0	0	0	0.1025	0	0.0441
55585	UBE2Q1	ubiquitin-conjugating enzyme E2Q family member 1	0.1063	0	0.0382	0.0265	0.1496	0	0.0868	0	0.1408	0.121	0.0531	0.0903	0	0	0.034	0.015	0.014	0.0076	0.052	0.0095	0.6002	0.0647	0	0	0.0423	0.0164	0.0832	0	0.0194	0.0074	0.1236	0	0.0217	0.0818	0.0813	0.0612	0.1169	0.0203	0.0403	0.0454	0.1497	0.0404	0.2014	0.0407	0.5911	0.0341	0.0548
80279	CDK5RAP3	CDK5 regulatory subunit associated protein 3	1.0543	0.2938	1.4171	0.5365	0.8206	1.1129	0.6453	1.0629	0.6496	1.062	0.4657	0.7514	0.2228	0.8335	0.7495	1.1531	0.4606	0.1713	0.3524	0.3314	1.6668	1.6968	0.296	0.9221	0.7538	0.9877	0.7057	0.518	0.56	0.7791	0.8506	0.9041	0.5505	0.9777	1.108	1.2884	0.8932	0.9132	0.7088	0.5763	1.3057	0.7044	0.4895	0.4698	0.6243	1.3064	1.3948
2266	FGG	fibrinogen gamma chain	23.3264	13.8716	312.529	27.842	13.4456	11.8765	11.8745	26.6783	523.996	3.9674	7.8157	8.4557	20.5496	5.7658	19.3558	8.2263	153.568	10.209	43.1776	5.6306	35.2002	28.7469	5.1388	9.1248	29.3351	9.6136	29.1666	28.1146	19.3437	3.9262	10.9424	60.3701	53.6466	8.0523	101.394	15.5844	18.7596	48.7493	3.9538	14.3265	11.7999	12.3715	10.9459	7.2248	179.767	8.6219	27.4965
91107	TRIM47	tripartite motif containing 47	1.0379	0.1086	0.1637	0.1493	0.8404	1.0109	0.2043	0.0306	0.4614	0.4089	0.2916	0.3639	0.0171	0.2191	0.1904	0.0722	0.1139	0.0256	0.1768	0.0025	5.9826	0.1135	0.1315	0.1137	0.3187	0.0957	0.0853	0.572	0.2051	0.1598	0.3104	0.6176	0.0841	0.1328	0.2975	0.7747	0.2838	1.0433	0.406	0.2037	0.7283	0.1591	0.3159	0.1516	0.695	0.0213	0.1166
2747	GLUD2	glutamate dehydrogenase 2	30.415	17.7579	5.6956	71.3484	25.8491	39.3177	4.4186	16.7856	15.8457	48.3731	8.3157	41.644	0.676	44.8126	9.721	45.4373	7.4535	7.2387	4.0074	8.0137	5.3653	28.0684	1.9291	54.0917	2.8264	34.5138	2.0487	32.9053	3.9161	46.0164	3.9697	52.8697	0.9961	18.9484	14.7557	26.4642	2.0441	26.3416	7.2113	18.6822	31.1528	11.2633	5.7209	40.6577	16.9276	11.4334	1.2792
91012	CERS5	ceramide synthase 5	0.0296	0	0	0	0	0	0	0	0	0	0	0	0	0	0	0	0	0	0	0	0	0	0	0	0	0	0	0	0	0	0	0	0	0	0	0	0	0	0	0	0	0	0	0	0.0176	0	0
54963	UCKL1	uridine-cytidine kinase 1-like 1	0	0.189	0.0341	0.1041	0.418	0.019	0.0126	0	0.3358	0.033	0.2094	0.0081	0	0	0	0	0	0.003	0.2507	0	0.2066	0.0231	0	0.119	0.1819	0.0048	0	0	0	0.0089	0.3726	0	0.0064	0.3987	0.0311	0.0095	0.0146	0.0942	0.296	0.0157	0	0.0036	0	0	0	0.0099	0
10103	TSPAN1	tetraspanin 1	2.188	11.0984	2.8498	9.5042	0.3569	1.0311	4.5788	0.908	1.384	15.6054	1.0021	2.8952	1.686	9.8535	0.4588	3.9565	2.5904	0.5656	1.2133	0.1577	0	1.7802	0.0573	1.5335	0.1405	2.7756	0.9386	0.8405	0.7638	2.036	0	1.6057	2.5447	5.2747	0	1.4997	0.113	1.7554	0	1.6713	24.061	3.4139	0	6.0779	0.0962	1.5144	0.1557
4131	MAP1B	microtubule-associated protein 1B	2.7526	0.961	0.1091	0.0554	1.3451	0.0674	0.3395	0.1425	3.4317	1.5025	0.1652	0.0616	0.0615	0.0671	1.0705	0.2271	0.1043	0.0068	0.0971	0.0337	0.2895	0.0521	0.1661	0.11	0.2989	0.037	0.4138	0.1	0.3511	0.1568	0.5248	0.1233	0.2044	1.0105	0.4695	0.2594	0.7334	1.5452	0.7129	0.3171	0.2458	0.0369	1.2346	0.0941	0.0696	0.1203	0.1685
141	ADPRH	ADP-ribosylarginine hydrolase	0.3113	0.2483	0.5281	0.3298	0.5674	0.0086	1.7925	0.5984	2.2173	0.9353	0.4246	0.281	0	0.0317	0.3756	0.1939	0.5354	0.0357	0.1921	0.0468	0.1024	0.3564	0.1645	0	0.2734	0.169	0.1543	0.0942	0.0523	0.0264	0.3278	0.0745	0.1015	0.1115	0.3355	0.0494	0.2844	0.0183	0.1734	0.0699	0.2465	0	0.2373	0.0116	6.1546	0.4603	1.399
1500	CTNND1	catenin (cadherin-associated protein), delta 1	8.0793	2.9817	6.2104	5.6237	6.2016	5.2461	8.1691	5.8803	9.9856	9.0179	2.3384	5.9646	0.9456	3.8896	5.0344	7.3331	4.9066	2.3001	5.5108	1.5695	4.2221	5.2707	2.3203	6.2265	3.9664	3.4629	4.6098	3.4666	2.8287	4.9311	4.1401	4.275	2.0223	3.4756	3.8702	3.7475	2.5429	4.8953	2.6719	3.5276	6.0531	3.0691	9.9135	4.9387	2.8318	7.755	1.8322
2806	GOT2	glutamic-oxaloacetic transaminase 2, mitochondrial	14.5289	25.0432	4.3417	57.1906	23.4607	68.764	7.0562	45.3062	25.0171	35.5574	10.8881	48.7772	0.938	48.3884	3.2989	51.8355	2.4285	22.4344	5.7498	15.7033	5.7512	36.8723	1.3062	38.0783	2.6452	26.1033	2.9517	42.8124	5.2777	84.0844	5.5958	68.1866	2.2569	46.3305	8.7387	36.6415	2.5386	57.8339	7.0021	25.1824	8.4025	17.8482	8.8787	49.6236	5.9247	77.1279	1.7265
9761	MLEC	malectin	6.3937	1.234	8.5738	2.3764	7.0347	2.9072	18.7922	1.2671	13.1045	3.6323	10.1897	1.9706	1.946	1.964	3.1286	2.4861	4.1765	0.4926	5.704	0.5155	3.8129	2.0421	0.5536	2.2569	2.9268	1.6134	3.5734	4.3625	4.0611	3.7828	3.1253	4.2415	1.6471	4.5116	3.3747	2.9471	3.4208	1.6557	4.0569	3.753	4.9117	1.4067	6.3263	1.5239	5.6409	1.7903	5.9448
8971	H1FX	H1 histone family, member X	1.1701	0.0203	0.5583	0.0405	0.5299	0.4784	0.1991	0.5911	1.0041	1.1718	2.0065	0.444	0.0833	0	1.9738	0.4329	1.4174	0.3785	6.0941	0.5709	2.6487	0.4321	1.1199	0.0662	2.0439	0.6098	3.1146	1.5609	1.2649	1.4072	1.9816	1.2609	1.4168	2.3533	1.5577	0.6726	0.9847	0.0923	1.2481	0.7855	0.7705	0.0779	0.3202	0.3254	0.0999	1.282	0.1133
708	C1QBP	complement component 1, q subcomponent binding protein	13.8528	29.6343	3.6354	41.7715	16.4194	23.9809	8.0257	40.8718	81.8339	41.4541	38.6335	66.0755	1.4789	77.5566	4.7029	66.5953	6.3607	3.6876	3.2292	2.8199	8.5562	31.3816	2.1106	40.3001	3.4064	19.9406	1.6653	31.1782	4.7217	43.6415	4.4037	37.4676	2.0737	46.7592	7.4988	30.4153	2.0694	31.5127	6.5602	17.3591	26.6425	4.2089	22.4408	34.509	4.6368	46.9647	5.4975
2212	FCGR2A	Fc fragment of IgG, low affinity IIa, receptor (CD32)	0.0391	0	0.0594	0	0.1616	0	0.0654	0	0.0299	0	0.0665	0	0.0099	0	0	0	0.0156	0	0	0	0.0247	0	0.003	0	0	0	0.0209	0	0	0	0.0126	0	0.0188	0	0.0912	0	0.0145	0	0.0661	0	0	0	0	0	0.0935	0	0.0958
51566	ARMCX3	armadillo repeat containing, X-linked 3	0.7187	0.1232	1.0521	0.3423	1.7598	0.4063	1.0647	0.1451	0.7783	0.5398	0.8621	0.5962	0.0377	0.2255	0.5356	0.4091	0.5555	0.0297	0.4299	0.0062	0.3344	0.2047	0.1754	0.1041	0.1456	0.2385	0.1052	0.0901	0.2678	0.3833	0.0776	1.2334	0.3626	0.4782	0.1892	0.2617	0.3143	0.4159	0.4262	0.3244	0.2247	0.1277	0.9342	0.2428	2.7495	0.1343	0.0891
57095	PITHD1	PITH (C-terminal proteasome-interacting domain of thioredoxin-like) domain containing 1	0.2058	0.1255	1.2344	0.5518	0.97	0.6394	1.3322	0.2149	1.1081	0.4327	0.7481	1.3029	0.1103	1.1833	1.0762	0.4113	0.3221	0.4794	0.8017	0.3572	0.1303	0.5166	0.2255	1.6528	0.5012	0.7644	0.3154	1.1568	0.8672	1.2081	0.8582	0.5245	0.5037	0.5544	0.887	0.7477	0.6603	1.1755	1.0179	1.0896	0.8764	0.2931	1.4107	0.3038	0.6132	0.1507	0.5967
2193	FARSA	phenylalanyl-tRNA synthetase, alpha subunit	1.7791	0.8731	0.4249	1.9959	2.0057	2.7947	3.6531	1.0205	2.6654	3.2783	1.0481	2.2179	0.3265	1.7353	1.3426	2.0632	1.0576	0.8371	0.4759	0.6218	2.4254	1.95	0.4558	1.7994	1.9118	1.3638	1.2373	1.2643	1.7678	2.4673	2.4219	0.8942	0.8554	2.5978	3.9307	1.6198	2.7742	2.4393	1.2631	1.574	2.1415	1.2616	1.3391	1.2221	2.4767	1.288	1.2126
1027	CDKN1B	cyclin-dependent kinase inhibitor 1B (p27, Kip1)	0.0377	0.0717	0	0	0.0935	0.0969	0.1434	0.046	0	0	0	0.0316	0.0092	0.0337	0.0272	0.0118	0.0462	0.023	0	0	0.1377	0	0	0	0	0	0.2146	0.1081	0.1617	0.0578	0.2451	0.0622	0.053	0.1186	0.0906	0.127	0.1543	0.114	0.1862	0.1356	0.116	0.0898	0.612	0	0.285	0.1033	0.2365
4774	NFIA	nuclear factor I/A	0.1157	0.0207	0.0557	0.2397	0.0594	0.0703	0.0241	0.073	0.0532	0	0.1328	0.1762	0.0112	0.0559	0.0842	0.0119	0.1043	0	0.0911	0.0261	0.1051	0.0666	0.0294	0.0466	0.0745	0.0269	0.0703	0.004	0.0587	0.0855	0.0953	0.0726	0.0442	0.1145	0.212	0.0586	0.0779	0.0795	0.1852	0.0034	0.0743	0.0044	0.2176	0.0578	0.0465	0.0504	0.028
23092	ARHGAP26	Rho GTPase activating protein 26	0.0096	0	0	0	0.0159	0	0.9571	0	0	0	0	0.0373	0	0	0.3934	0	0.1829	0.0559	0.0846	0	0.0341	0.0503	0.0088	0	0.0155	0	0.0138	0	0.0093	0	0.1271	0	0.0259	0	0.2416	0	0	0	0.0087	0.0097	0	0	0	0	0.069	0.0081	0.1972
23576	DDAH1	dimethylarginine dimethylaminohydrolase 1	11.339	27.1059	15.8292	88.5228	9.1389	110.97	22.1068	27.0146	22.1732	83.1596	29.3507	58.8739	3.9005	47.6041	29.066	79.0939	28.9273	9.8551	20.1109	7.0717	35.2756	82.0903	9.2891	94.1166	56.9193	45.8169	17.825	47.3554	20.8977	103.156	24.046	63.4126	12.2812	59.3544	25.6986	53.0639	30.8647	25.1368	21.4592	21.6123	24.1192	16.6846	48.6104	67.4781	14.6475	37.1187	12.6637
6748	SSR4	signal sequence receptor, delta	9.6549	6.544	13.8794	12.644	20.546	3.8192	26.1469	2.8198	19.0409	9.2815	25.1105	13.5919	0.2285	2.7368	5.5059	9.146	4.9893	2.2902	5.121	0.5759	5.4558	6.198	1.5438	10.3147	3.2389	4.7974	5.784	2.8755	2.4458	4.2154	6.9207	5.5902	5.8701	6.6345	6.172	4.7482	7.2995	9.2776	13.9807	4.1219	4.7481	7.8172	10.5044	6.9056	11.1647	6.4587	3.6853
2744	GLS	glutaminase	3.6784	27.2155	3.3077	25.7217	10.326	45.7467	2.0303	6.8296	36.8937	26.3488	9.597	19.7507	0.2713	34.9819	1.8383	36.5374	1.9017	3.3045	0.8021	2.1023	1.094	22.0766	0.5039	22.1834	1.8717	15.1074	0.6961	27.2013	2.0818	60.5741	2.811	44.9099	2.1061	25.0165	3.974	29.9899	1.7726	44.1917	1.3598	15.8286	8.0887	23.0018	6.4724	19.927	4.0045	6.5397	0.9108
57118	CAMK1D	calcium/calmodulin-dependent protein kinase ID	0.2161	0.03	0.0336	0.1515	0.0643	0.0401	0.3541	0.09	0.2673	0.35	0.0832	0.1146	0.0103	0.0781	0.0735	0.0542	0.2233	0.0174	0	0	0.1768	0.009	0.0405	0.0977	0.1848	0.1039	0.1652	0.059	0.1168	0.1633	0.1313	0.1215	0.0957	0.0549	0.2837	0.0391	0.0563	0.0609	0.1485	0.1	0.0593	0.0661	0.0543	0.0302	0.194	0.0076	0.0473
729540	RGPD6	RANBP2-like and GRIP domain containing 6	0.0189	0.0026	0.0117	0.0065	0.0231	0.0204	0.0183	0.0092	0.0287	0.0139	0.0145	0.0069	0.0013	0.0038	0.0181	0.0146	0.0182	0.0034	0.0091	0.0003	0.011	0.0096	0.0045	0.0162	0.008	0.0078	0.0672	0.007	0.0085	0.0238	0.009	0.0076	0.0041	0.0108	0.0166	0.0074	0.0356	0.0098	0.0111	0.0081	0.0209	0.0037	0.0219	0.0056	0.0196	0.0117	0.0061
2475	MTOR	mechanistic target of rapamycin (serine/threonine kinase)	0.3136	0.1351	0.0532	0.1245	0.0879	0.9119	0.3832	0.2693	0.1735	0.2195	0.2103	0.9575	0.0843	0.2228	0.2789	0.2923	0.4536	0.235	0.2007	0.0126	0.0966	0.6397	0.1069	0.8672	0.5104	0.0897	0.8314	0.0888	0.0385	0.3501	0.1894	1.5689	0.0705	0.5997	0.1275	0.9258	0.7604	0.7339	0.3903	0.5503	0.0944	0.2668	0.1037	0.253	0.8926	0.1356	0.1334
54514	DDX4	DEAD (Asp-Glu-Ala-Asp) box polypeptide 4	0.1025	0	0	0	0.1782	0.0509	0.024	0.0012	0	0	0.0731	0	0	0.0009	0.0813	0.0203	0	0.0279	0	0.0024	0.0395	0.0397	0.0122	0	0	0.0281	0	0	0	0	0	0	0	0	0	0	0	0.0588	0	0	0.0815	0.0147	0.0595	0	0.0685	0	0
23438	HARS2	histidyl-tRNA synthetase 2, mitochondrial	2.9226	0.4864	0.9641	0.5794	5.9321	1.5858	1.1519	1.1538	1.047	1.3958	3.3468	2.1206	0.0992	0.7059	0.5501	1.6867	1.113	0.3804	0.3099	0.1417	0.6317	3.3772	0.0502	0.8839	0.3742	0.4709	3.9224	3.9435	5.4452	2.4025	0.547	1.1502	0.3714	1.3722	1.0743	0.8106	2.0902	1.2864	2.2691	0.5818	1.6613	0.4937	1.7612	0.6753	1.2692	0.5479	0.4539
27335	EIF3K	eukaryotic translation initiation factor 3, subunit K	4.9346	0.6071	0.8175	0.4961	2.3698	2.5441	1.5486	2.1557	4.7446	3.3884	2.3052	1.0272	0.418	2.0449	3.9593	2.8257	1.2745	0.7426	1.9047	0.6964	1.7177	2.0981	0.1682	1.5261	0.9126	0.8034	2.1188	4.0534	2.5296	3.677	2.5934	1.7395	0.5198	3.9244	2.9369	3.3006	0.9093	2.2112	2.4194	3.7209	2.7881	1.9537	1.4528	1.5935	4.6202	2.0046	1.3587
5706	PSMC6	proteasome (prosome, macropain) 26S subunit, ATPase, 6	4.1637	1.5618	3.6341	3.7856	2.333	13.1404	4.5414	1.5404	5.5254	3.6663	2.6343	4.8761	0.453	2.5633	2.1758	3.9814	1.9464	0.7039	1.8626	0.659	3.0921	6.3327	1.3168	3.4778	2.6034	2.0084	1.724	2.4395	1.5199	5.4495	2.2156	2.8142	1.1003	3.2357	1.4496	4.0029	1.8265	4.6503	1.4834	1.4887	4.2683	0.8311	5.5897	2.1149	1.6609	2.0921	1.4842
116540	MRPL53	mitochondrial ribosomal protein L53	0.5233	0.3296	0.3564	0.533	0.124	0.1859	0	0.3908	0	0.5061	0.2901	0.8258	0.0194	0.4177	0.0191	0.7341	0.2859	0.4574	0	0.3177	0	0.9047	0	1.5223	0	0.6193	0	0.0779	0.1411	1.1444	0	0.1583	0	0.3123	0.0995	0.1938	0	0.3133	0	0.3541	0	0.109	0	0.4073	0	0.7875	0.0811
2790	GNG10	guanine nucleotide binding protein (G protein), gamma 10	0.5423	0.0574	0.9378	0.1788	1.0461	0.1358	0.8664	0.3059	1.0116	0.4663	0.7896	0	0.4094	0	0.7018	0.9809	0.5015	0.1754	0.3202	0.1413	0.6826	0.206	0.764	0	1.1995	0.0753	0.0134	0	0.338	0	0.2721	0	0.1224	0.0672	0.6791	0.0797	0.8514	0.1789	0.6702	0.1893	0.6531	0.1661	0.3771	0	0.7933	0.5406	0.5759
5318	PKP2	plakophilin 2	0.032	0.0427	0.2599	0.1048	0.2861	0.2251	0.0654	0.1568	0	0.021	0.0628	0.087	0	0.0696	0.0831	0.1719	0.0887	0.0074	0.1614	0	0.0288	0.0594	0.0016	0.3622	0.0136	0.0801	0.0362	0.1006	0.0197	0.0295	0.0156	0.1075	0.0377	0.0585	0.0281	0.0743	0.0182	0.0758	0.0345	0.0677	0	0.0114	0.1807	0.0802	0	0.1278	0
10114	HIPK3	homeodomain interacting protein kinase 3	0.0058	0	0	0	0	0	0	0	0	0	0	0	0	0	0	0	0	0	0	0	0	0	0	0	0	0	0	0	0	0	0	0	0	0	0	0	0	0	0	0	0	0	0	0	0	0	0
221092	HNRNPUL2	heterogeneous nuclear ribonucleoprotein U-like 2	7.2223	3.5607	9.3407	3.4414	3.8501	2.6843	8.7355	3.635	8.9385	7.2088	3.3479	3.1171	1.2258	1.6211	4.5813	4.7598	4.1254	1.5168	4.1721	0.771	6.2842	7.4887	2.7731	3.6753	3.701	1.708	5.3647	2.9033	4.0978	4.3324	2.5944	2.6463	3.1597	3.9131	3.1113	2.4937	1.7248	2.6566	3.5204	1.9499	4.9286	1.2346	8.036	2.4462	2.2048	6.6322	3.5105
28959	TMEM176B	transmembrane protein 176B	0.9864	0.2517	1.1346	0.1849	2.028	0.3058	1.5062	0.1002	0.6126	1.2878	0.5242	0.2765	0.0986	0.5985	0.447	0	1.0477	0	0.1988	0	0.4917	0.1447	0.0651	0	0.2502	0.1353	0.2524	0.2797	0.1619	0.124	0.1906	0.1982	0.15	0.3547	0.6978	0.1275	0.2147	0.3322	0.23	0.1933	1.0116	0.0534	0.3853	0.6412	0.7215	0.1048	0.1051
3101	HK3	hexokinase 3 (white cell)	0.2949	0.0461	0.4329	0.087	0.6354	0.1119	0.4806	0.0857	0.6991	0.1933	0.9302	0.0589	0.0336	0.1388	0.0958	0.0938	0.2394	0.184	0.042	0.0839	0.2274	0.112	0.0674	0.3381	0.1279	0.1117	0.1528	0.0461	0.1547	0.0689	0.1027	0.0933	0.1134	0.2205	0.2755	0.1047	0.0677	0.079	0.2382	0.1749	0.679	0.0576	0.2108	0.0216	0.3063	0.5553	0.3769
3052	HCCS	holocytochrome c synthase	0.1136	0.343	0.7189	0.1721	0.4429	0.186	0.2208	0.0225	0.2215	0.3799	0.5028	0.3327	0.0098	0.2542	0.0146	0.3391	0.0462	0.0778	0.0192	0.0758	0.0318	0.5537	0.0202	0.3996	0.0187	0.3215	0	0.0778	0	0.2355	0	0.2099	0.0137	0.1637	0.1893	0.1816	0.076	0.2313	0.0585	0.1582	0	0.2346	0.1372	0.2264	0.1374	0.3148	0
221477	C6orf89	chromosome 6 open reading frame 89	0.0123	0	0	0	0.0447	0.0159	0	0	0.0148	0	0.0141	0	0	0	0	1.1679	0	0	0	0	0.1669	0	0.0038	0	0.0059	0	0.0379	0	0.0676	0	0.015	0	0.06	0	0.0297	0	0.0193	0.0215	0.0177	0.0134	0.0166	0	0	0	0	0	0
29957	SLC25A24	solute carrier family 25 (mitochondrial carrier; phosphate carrier), member 24	3.1711	1.9103	3.6842	4.3568	6.5264	3.7899	4.1296	1.6378	7.6986	3.1931	8.1916	3.6217	0.1925	2.7477	1.8085	3.3812	1.4444	0.8945	1.0456	0.8927	3.4021	7.0767	1.5043	4.3768	2.3637	3.02	1.8273	3.2132	3.0909	4.0144	3.1903	5.0647	1.6681	2.7929	7.0896	3.8946	1.7707	3.2685	2.4737	2.2742	5.1405	1.7294	5.4439	2.265	3.6456	2.7442	0.8357
2350	FOLR2	folate receptor 2 (fetal)	0.3398	0	2.6437	6.0877	0.6615	0.1943	0.0741	0	1.4277	10.5013	1.071	0.3866	0	0	1.1208	0.03	0.0835	0.1382	0.5806	0	1.2875	8.5872	0.4788	0.0303	1.156	3.7088	0.4052	0.23	0.3516	0.0526	0.2934	0.1798	0.1508	0.2544	0.816	0.0542	0.881	0.0691	0.4789	0.0731	0.0308	0.0403	0.0614	0	1.9656	0	0.3282
23363	OBSL1	obscurin-like 1	0.1198	0.0046	0	0.058	0.0236	0	0.1435	0.0581	0	0	0.0099	0.0176	0.0165	0	0.1472	0.0417	0.0047	0.0502	0.044	0	0.0391	0	0.0036	0.0107	0.0039	0.0137	0.0143	0.0262	0.0354	0.015	0.0114	0.0052	0	0.1321	0	0.033	0.0223	0.2219	0	0.0922	0	0.7853	0	0	0	0.013	0
79133	NDUFAF5	NADH dehydrogenase (ubiquinone) complex I, assembly factor 5	2.8385	1.0925	0.1047	0.6406	0.2914	0.709	0	0.0324	0	0.1101	0.0863	0.0915	0.0073	0.1484	0.0076	2.7301	3.2765	0.4802	0.0933	0.0162	0.4581	0.2907	0.0727	1.765	0.5759	1.2558	0	3.7854	0	0.4339	0	0.3629	0	0.1125	0	0.3404	0	0.2779	0.096	1.1367	0.0345	0	0	0.0827	0.711	0.049	0.0125
55612	FERMT1	fermitin family member 1	0.237	0.1556	0.0656	0.7799	0.1078	0.3786	0.1122	0.3579	0.1216	0.3883	0.0556	0.191	0.0159	0.2412	0.1477	0.2094	0.0697	0.2056	0.078	0.1499	0.2814	0.2339	0.0973	0.7451	0.121	0.1188	0.1014	0.242	0.0686	0.4121	0.2131	0.8136	0.0551	1.1355	0.1538	0.1812	0.1698	1.2635	0.1337	0.1301	0.1606	0.4292	0.1724	0.2844	0.1474	0.5659	0.1057
7412	VCAM1	vascular cell adhesion molecule 1	3.5872	0.0575	4.1307	0.1133	2.8357	0.2843	2.8985	0.0595	1.5597	0.258	1.1241	0.2018	0.2341	0.3802	0.7012	0.0663	0.2472	0.0048	0.3537	0	1.0504	0.4131	0.1729	0.0137	0.7887	0.0577	1.7899	0.1491	1.9723	0.2198	2.2225	0.1246	0.6811	0.1145	1.1345	0.0433	1.5733	0.1052	1.6107	0.5066	0.5287	0.0336	0.9293	0.0385	2.5705	0.0438	0.9926
4046	LSP1	lymphocyte-specific protein 1	0.6164	0	0.2036	0.1535	0.6238	0	1.8296	0.0403	0.8551	0.1773	0	0	0.0807	0.0554	0.0165	0.0218	0.0434	0	0.3713	0.0121	0.7792	0.0341	0.218	0.1594	0.2681	0.1657	0.1783	0.0232	0.3358	0	0.1748	0.0156	0.1858	0	0.5194	0	0.1661	0	0.5764	0	0.3538	0	0.0267	0	0.8255	0.0651	0.5279
84365	MKI67IP	MKI67 (FHA domain) interacting nucleolar phosphoprotein	0.2979	0	0	0	0.0155	0	0.0512	0	0.42	0.021	0.2425	0	0.0128	0.0079	0.0099	0.1022	0.0494	0	0.0673	0	0.1532	0	0.006	0	0	0	0.0378	0	0.2207	0	0	0	0.0439	0.037	0.1002	0	0.0629	0	0.5164	0.0216	0.2514	0	0.1483	0	0	0.0762	0
55763	EXOC1	exocyst complex component 1	1.3799	0.2387	0.3595	0.4328	0.7293	0.6497	0.2692	0.3251	0.1724	0.272	1.1232	1.5311	0.1089	1.3425	0.0217	0.1928	0.0387	0.0166	0.0082	0.3869	0.338	0.4044	0.2639	0.5196	0.2749	0.1863	0.0123	0.0351	0.059	0.0289	0.2326	0.0414	0.0551	0.0541	0.0843	0.0846	0.1307	0.0406	0.2362	0.0457	1.3963	0.3328	0.8837	1.0605	0.1482	0.3498	0.0674
11285	B4GALT7	xylosylprotein beta 1,4-galactosyltransferase, polypeptide 7	0.1994	0	0.0122	0	0.0214	0	0.049	0.0089	0.0344	0.0136	0.0429	0	0	0	0	0	0	0	0	0	0.0096	0	0	0	0	0	0	0	0	0	0	0	0	0.0097	0	0	0	0.0088	0.0076	0	0.0237	0	0.0064	0	0	0	0
64963	MRPS11	mitochondrial ribosomal protein S11	1.8456	1.5015	0.1521	1.5879	0.4224	2.6572	0.2506	0.5006	1.6991	5.1469	1.9932	5.1225	0.0326	2.6949	0.3211	2.7933	0.6874	0.7016	0	0.0698	0.3289	2.2535	0.0999	3.002	0.1185	1.2511	0.081	1.3228	0.0435	1.118	0.0423	0.7452	0	2.5438	0.2347	1.4629	0.1531	2.4796	0.1837	1.5119	0.7522	0.2997	0.4208	2.5098	0	2.6174	0
2047	EPHB1	EPH receptor B1	0.009	0	0	0	0	0.0034	0	0.0016	0	0	0	0	0	0	0	0	0	0.0056	0	0.0087	0	0	0	0	0.0013	0	0	0.0022	0	0	0.0007	0	0	0	0.002	0	0.0025	0.0064	0.0013	0	0	0	0	0	0	0.0038	0
79624	C6orf211	chromosome 6 open reading frame 211	1.6095	0.8864	0.5351	1.0562	1.1077	1.5649	0.65	0.8155	1.4939	2.3665	2.5643	1.4258	0.3194	1.2554	0.4649	0.9718	0.7338	0.1793	0.379	0.135	0.9629	2.0914	0.0774	1.388	0.5405	1.1312	0.6996	0.5688	0.4957	1.285	0.4859	1.0285	0.4975	1.0615	0.8896	0.9142	1.0153	1.0721	0.9275	0.5918	0.6281	1.0672	0.3068	0.8344	0.7474	0.8959	1.0681
9716	AQR	aquarius homolog (mouse)	0.1298	0.0799	0.1319	0.0311	0.0287	0.0751	0.1349	0.0848	0.9054	0.1904	0.5645	0.1034	0	0.0246	0.0579	0.045	0.0963	0.0347	0.2671	0.1747	0.0874	0.0844	0.0361	0.0941	0.2358	0.136	0.111	0.0784	0.1477	0.0456	0.1449	0.0204	0.0619	0.1423	0.0836	0.0201	0.1295	0.0703	0.1052	0.0644	0.015	0.0116	0.2109	0.0257	0.0444	0.1694	0.0269
2588	GALNS	galactosamine (N-acetyl)-6-sulfate sulfatase	0.0351	0.2504	0.1668	1.1429	0.0661	0	0.1025	0.2137	0.187	0.2378	0.0917	0.0749	0	0.162	0.018	0.2132	0.0749	0.1109	0.0437	0	0	0.6886	0	0.3387	0	0.0476	0	0.1965	0.0485	0.3477	0	0.1498	0.1941	0.1936	0.0383	0	0.1103	0.2065	0	0	0.963	0	0.0927	0.1346	0.0768	0.0798	0
4128	MAOA	monoamine oxidase A	13.8508	19.4455	35.3293	31.2858	87.9063	42.753	18.8853	36.3564	67.1119	24.2916	47.9059	27.3156	0.2684	34.3441	4.9143	45.1195	5.0886	14.9357	2.3521	6.9569	1.4889	40.0454	0.1434	51.7111	0.7936	21.6107	2.5375	20.1418	2.2631	38.3344	2.6626	26.17	3.7886	28.3961	2.2401	21.6839	0.4228	30.7876	9.7052	18.7447	38.4239	25.0511	31.5651	40.2166	3.1496	33.0871	0.6376
258010	SVIP	small VCP/p97-interacting protein	0.5337	0	0.2948	0.5404	0.3859	2.5781	0.7242	0	0	0	0.6219	0.5458	0	0	0	0	0.2368	0.5557	0	0	0.1082	0	0	0.1661	0	0.2888	0	0	0	0	0	0	0	1.2104	0	0	0.6129	0	0	0	0.3574	0.5592	0	2.0298	0	0	0
55742	PARVA	parvin, alpha	2.8466	1.3319	1.6573	2.8898	2.5177	3.64	1.2808	4.7132	1.3371	5.3277	0.9928	2.4259	0.2738	3.5857	2.4117	2.0267	0.9953	1.214	0.9283	0.8389	2.1161	2.4034	0.6307	2.5499	1.8845	1.5957	1.5343	2.2347	1.2791	2.4195	3.0444	2.9417	0.8709	3.6518	2.3572	2.0235	2.515	3.5669	2.2381	1.8826	1.5716	2.6239	1.7412	1.282	2.8979	3.4198	1.4155
285855	RPL7L1	ribosomal protein L7-like 1	0.3472	0.014	0.0764	0	0.1502	0	0.115	0.0296	0.2916	0	0.9735	0.0794	0.0085	0.0201	0.0937	0	0	0	0.0083	0	0.1809	0.0501	0.0155	0.0109	0.0384	0.0284	0.0136	0.0061	0.0067	0.0531	0.1158	0	0.0849	0.0308	0.0953	0.0275	0.0684	0.0177	0.2065	0.0729	0.1094	0	0.0674	0	0.1111	0.0532	0.0647
7325	UBE2E2	ubiquitin-conjugating enzyme E2E 2	0.1076	0	0	0.0247	0.0535	0.0816	0	0.0469	0.1535	0	0	0.0384	0	0.0821	0	0	0	0	0.0354	0.0169	0.0789	0	0.0267	0.0759	0	0	0.1142	0.0792	0.0809	0.0607	0.1132	0.1038	0.0409	0.0968	0.1273	0.1071	0.0958	0.04	0.0922	0.0131	0.0529	0	0.0841	0.0221	0.0968	0.0131	0.0471
170575	GIMAP1	GTPase, IMAP family member 1	0.183	0.0564	0.3101	0.1942	0.4315	0.0771	0.3623	0.1839	0.525	0.8266	0.1528	0.0479	0.0258	0	0.7723	0.4885	0.1445	0.0166	0.2881	0.2406	0.8874	0.1745	0.1718	0.0584	0.3471	0.056	0.2377	0.0854	0.3332	0.0561	0.5623	0.0869	0.4134	0.1161	0.4175	0.0651	0.2585	0.0939	0.5658	0.199	0.2851	0.0515	0.1433	0.0255	0.603	0.2934	0.3163
4134	MAP4	microtubule-associated protein 4	4.0965	1.2267	0.9613	1.6913	2.1777	2.8501	3.5208	1.6939	4.4696	4.0151	0.3497	1.0558	0.2597	2.4687	1.3438	2.0484	0.8687	0.8819	0.9858	0.9686	1.5017	2.2533	0.4911	1.2419	1.5665	1.3313	1.2681	1.4959	1.1897	2.5332	2.036	2.1992	0.7923	1.8247	1.2569	1.3749	1.9306	1.748	1.3499	1.5488	4.2369	1.1061	2.0732	2.2452	3.3741	2.4347	1.2067
9514	GAL3ST1	galactose-3-O-sulfotransferase 1	0.065	0.013	0.0559	0	0.2093	0.3242	1.9894	0.039	0.8556	0.6094	0.4403	0.2702	0	0.2072	0.1028	0.8549	0.077	0	0.2731	0	0.0541	0.5224	0	0.1932	0.3019	0	0.0179	0.0245	0	0.129	0	0.0222	0.0386	0.5935	0.0114	0.1059	0.0699	0.1549	0.0729	0.5329	0.9264	0.2268	0	0	0.1727	0.2799	0.0058
51599	LSR	lipolysis stimulated lipoprotein receptor	0.0478	0	0.0068	0	0.0283	0.5895	0.3481	0	0.0622	0	0.0125	0	0.0174	0.1001	0.036	0.0471	0.1759	0.056	0	0.0569	0.0251	0.033	0	0	0	0	0	0	0	0.085	0	0	0.254	0.104	0	0.0175	0	0	0	0	0	0	0	0.0116	0.0093	0.0458	0.0093
1982	EIF4G2	eukaryotic translation initiation factor 4 gamma, 2	1.0247	0.2194	0.4848	0.4452	0.6993	0.6566	0.9149	0.3029	0.5167	0.7794	0.4429	0.6214	0.0136	0.4346	0.6047	0.805	0.5477	0.2074	0.3827	0.0453	0.6662	1.1556	0.1591	0.4731	0.2717	0.4963	0.4402	0.3479	0.2668	0.5007	0.4452	0.3272	0.2123	0.5154	0.4913	0.4052	0.6587	0.531	0.6325	0.3619	0.4978	0.5583	1.0435	0.5371	0.7899	0.3016	0.3906
8936	WASF1	WAS protein family, member 1	0	0	0	0	0	0.0118	0	0	0	0	0	0	0	0	0	0	0	0	0	0	0	0	0	0	0	0	0	0	0	0	0.0054	0	0	0	0	0	0	0	0	0	0	0	0	0	0	0	0
2167	FABP4	fatty acid binding protein 4, adipocyte	0.3831	0.6008	0	0.3133	0.0414	0.7493	0	0.4129	0	1.1271	0	0.3003	0	0.0533	0.0828	0.5159	0.0771	0.1857	0.553	0.7245	7.3511	1.6835	2.5935	0.2712	3.1909	1.0674	0.5046	0.0661	1.065	0.3522	1.6578	0.7289	0.1027	0.8241	0	1.3362	2.3678	0.4261	2.2622	1.0607	0	0.1273	0.0936	0.8565	0	0.3322	0
10284	SAP18	Sin3A-associated protein, 18kDa	0.1033	0.6296	1.3837	0.4562	4.4635	0.0607	0.6055	1.5787	1.5273	0.5949	0.9804	0.4634	0.06	0.6183	0.7315	0.6044	0.5446	0.2033	3.9688	0.4576	1.3673	0.9158	0.7708	0.3707	0.7206	0.3383	1.9206	1.0204	0.3404	0.8988	1.8983	0.5026	0.9656	2.1752	1.6789	1.2333	2.0932	1.4976	2.8166	1.5192	0.403	0.5596	0.9282	0.1922	1.7388	1.0899	1.264
1889	ECE1	endothelin converting enzyme 1	0.0794	0.0492	0.2484	0.0035	0.1986	0.0583	0.1088	0.1262	0.1958	0.0832	0.1362	0.1956	0	0.1691	0.0714	0.0385	0.0299	0.0054	0.033	0.0131	0.2408	0.152	0.0427	0.1156	0.0419	0.0176	0.0613	0.0963	0.0984	0.0201	0.1103	0.0715	0.0505	0.0151	0.0189	0.2314	0.084	0.0312	0.0579	0.0171	0.036	0.02	0.0534	0.1422	0.1383	0.1295	0.0224
1404	HAPLN1	hyaluronan and proteoglycan link protein 1	7.2437	0	3.7604	0	2.0596	0	2.6568	0.0154	1.9909	0	0.3402	0	0	0	0.0222	0	1.8053	0.0105	4.2331	0	1.4445	0.081	0.2336	0.0115	0.1835	0.0465	0.3278	0	1.6957	0	0	0	0.658	0	0.6579	0	0.6633	0	0.0349	0	6.6297	0	1.6666	0.0026	2.7448	0.3172	0.7676
23200	ATP11B	ATPase, class VI, type 11B	0.0213	0.0105	0.0326	0	0.0808	0.0039	0.0413	0.0006	0.0039	0	0.0621	0	0.0021	0.0008	0.0176	0.0015	0.0259	0.0031	0.3106	0.2389	0.0513	0.0132	0.0019	0.0216	0.0406	0	0.0164	0.0018	0.0562	0.0153	0.0141	0.02	0.0038	0.0159	0.0252	0.3303	0.0061	0.02	0.3814	0	0.0418	0.0037	0.1007	0.0013	0.042	0	0.0004
2026	ENO2	enolase 2 (gamma, neuronal)	61.1838	4.3433	117.448	18.0671	117.213	34.5436	325.037	92.6513	471.371	55.269	250.099	20.3022	36.1973	18.1766	140.563	32.0622	115.632	45.6017	74.9361	26.9241	180.114	15.6994	48.6148	15.0498	220.656	8.4197	180.713	20.6368	131.521	40.1544	209.499	33.836	128.463	48.9908	172.949	10.0508	298.824	17.7947	359.88	21.67	127.224	2.3589	396.986	17.1745	32.5407	104.478	116.071
55970	GNG12	guanine nucleotide binding protein (G protein), gamma 12	31.6493	10.2946	35.5923	31.4199	22.0575	26.2927	12.5321	15.3607	35.8206	64.5681	9.0071	13.303	4.3235	20.0103	10.5954	16.2824	10.6031	4.4641	4.3973	2.2532	16.2219	42.9479	15.9407	11.6815	25.6573	14.9483	25.0498	22.7355	12.8654	35.6733	17.9763	28.8593	11.1886	29.8048	9.9491	27.7024	35.3119	32.3988	25.9043	22.595	10.7766	2.618	14.678	6.4753	4.7853	13.1649	5.7119
23	ABCF1	ATP-binding cassette, sub-family F (GCN20), member 1	0.4357	0.3301	0.4058	0.409	0.4493	0.2838	1.708	0.1201	0.1756	0.6727	0.4499	0.2284	0.1162	0.2263	0.4845	0.574	0.3033	0.1979	0.3206	0.2638	0.8944	0.6918	0.1446	0.436	0.3725	0.3745	0.1597	0.1789	2.1666	0.4325	2.4787	0.3099	0.1425	0.5301	0.5461	0.3411	1.9769	0.4244	3.3654	0.3758	0.7607	0.0984	1.4936	0.162	0.6519	0.7719	0.6235
439921	MXRA7	matrix-remodelling associated 7	1.1636	0	0.7257	0.0454	0	0	0.1376	0.015	0.2007	0	0	0	0.072	0	0.0559	0	0.0575	0	0.1492	0.0408	0.4366	0	0.2217	0.0529	0.1533	0	0	0	0.0652	0	0	0	0	0	0	0	0.055	0	0.0356	0.0168	1.3021	0	0.0344	0	0	0	0
415	ARSE	arylsulfatase E (chondrodysplasia punctata 1)	0.7006	0.3185	0.3973	0.3237	0.7982	0.6311	0.7099	0.3777	0.3808	0.4657	1.0879	0.492	0.072	0.758	0.0641	0.5932	0.5556	0.0367	0.3485	0	0.3953	0.8437	0.12	0.6987	0.3088	0.7608	0.415	0.4724	0.181	0.583	0.1361	0.6498	0.0364	0.1476	0.2289	0.7669	0.2196	0.7969	0.0405	0.0598	0.1262	0.2994	0.1524	0.5783	0.0742	0.007	0.2686
158747	MOSPD2	motile sperm domain containing 2	0.0398	0	0.1168	0.0057	0.0958	0.0112	0.0922	0.0123	0.0922	0.1228	0.0568	0	0.0098	0.0184	0.027	0.0293	0.1667	0.0127	0.0126	0	0.0108	0.0324	0.006	0.0052	0.0373	0.0024	0.0397	0.0208	0.0102	0.0532	0.0301	0.0259	0.0194	0	0.0331	0.024	0	0.0181	0.071	0.0391	0	0.0998	0.0181	0	0.0527	0.0113	0.0518
667	DST	dystonin	0.2154	0.0719	0.0683	0.1188	0.0396	0.0756	0.0217	0.0172	0.1158	0.102	0.0228	0.1354	0.001	0.1718	0.0205	0.0136	0.0018	0.0059	0.0018	0.0033	0.0303	0.1315	0.0087	0.0888	0.0438	0.0239	0.0099	0.0199	0.0229	0.0611	0.0187	0.0477	0.0136	0.0612	0.0257	0.075	0.0256	0.1897	0.0233	0.0476	0.0089	0.0192	0.0209	0.1201	0.0447	0.0055	0.0652
7045	TGFBI	transforming growth factor, beta-induced, 68kDa	72.0851	5.4609	227.168	25.7941	301.173	25.6073	261.161	25.2662	409.849	28.5503	175.568	14.6123	2.2719	8.9982	14.151	11.0991	4.4845	4.6409	8.0729	3.208	14.8227	10.0142	1.7082	6.9798	18.2995	6.9488	7.557	13.4631	3.0187	12.6463	18.0493	19.0805	8.047	68.2939	17.6499	11.1845	15.3458	32.0117	33.0936	41.1112	26.3565	2.0186	31.4942	7.6747	11.6841	68.3661	19.0714
55364	IMPACT	impact RWD domain protein	0.7301	0.059	0.0581	0.0715	0.4005	0.2083	0.5015	0.1264	0.5028	0.0983	0.3401	0.1535	0.0117	0.7079	0.1883	0.3806	0.1594	0.159	0.166	0.2706	0.4314	0.0863	0.2519	0.1442	0.327	0.0257	0.0108	0.1249	0.2524	0.1634	0.8454	0.156	0.1191	0.0868	0.2148	0.058	0.1572	0.0602	0.0713	0.0837	0.947	0.2172	0.6271	0.4124	0.3294	0.3573	0.1114
2072	ERCC4	excision repair cross-complementing rodent repair deficiency, complementation group 4	0	0	0	0	0.0143	0	0.0478	0.0044	0	0	0	0	0.0008	0.0015	0	0	0	0.0015	0.0018	0.0012	0	0.0128	0	0	0.0244	0	0	0	0.0015	0.0035	0.0029	0	0.0016	0.0206	0	0	0	0.0053	0.0029	0	0	0	0	0	0.0145	0.1297	0.0123
51776	ZAK	sterile alpha motif and leucine zipper containing kinase AZK	0.0486	0	0.1873	0	0.1051	0	0.4665	0	0.4276	0.2642	0.0851	0.0857	0	0	0.193	0.02	0.0228	0	0.0108	0	0.1676	0.0267	0.0539	0	0.1233	0.0038	0.1053	0.0288	0.0147	0	0.1571	0	0.0198	0.026	0.0353	0	0.1176	0.056	0.1265	0	0.0212	0	0.2843	0	0.2296	0.0208	0.0563
8653	DDX3Y	DEAD (Asp-Glu-Ala-Asp) box helicase 3, Y-linked	1.3565	0.7134	1.8336	1.1397	2.5681	1.1581	1.7552	2.2772	2.2248	2.2977	1.3421	1.6107	0.2514	1.4192	1.5501	1.1498	1.152	0.5826	1.3821	0.3186	1.3115	1.2795	0.418	0.7702	1.2239	0.7643	1.548	1.7437	1.1917	2.3767	1.2358	1.0887	0.4513	1.5031	1.8621	1.5541	0.9917	1.2428	1.0874	1.3209	0.9829	0.7282	1.6806	1.1972	0.8002	1.7231	0.7845
2331	FMOD	fibromodulin	4.0559	0.1071	0.1979	0.5393	1.0247	0.0365	2.2662	0.2526	0.7309	4.7713	0.2898	0	0.0745	0.1782	0.1971	0.0494	0.3225	0.0449	0.384	0	0.2203	0.1437	0.047	0.4844	4.1407	0.1396	0.1258	0.0745	0	0	0.2049	0.0317	0.1877	0.1331	0	0.5669	0.2151	0.4211	0.1147	0	1.1906	0	0.2624	0.1248	0.0963	0.2314	0.1443
9444	QKI	QKI, KH domain containing, RNA binding	0.9896	0.0258	0.4914	0.1745	0.9222	1.5287	0.7481	0.4921	0.5229	0.8002	0	0.3319	0.0169	0.3079	0.8405	0.2602	6.3775	0.2923	3.7818	0.0947	0.5784	0.2566	0.2689	0.3091	0.8777	2.643	0.8802	0.4515	0.341	1.5606	1.5956	1.0223	0.7437	0.8494	1.2546	1.0145	0.569	0.9812	0.2853	0.5061	15.2001	2.9717	0.4145	2.2343	0.8003	0.5944	1.2739
30	ACAA1	acetyl-CoA acyltransferase 1	1.1855	23.937	0.1647	26.5079	0.7381	69.5489	1.0356	9.2213	1.334	24.3295	0.9741	40.3216	0.5947	67.1187	1.1383	26.6153	1.3588	1.5249	0.462	0.5605	1.4119	31.4673	0.3968	34.201	1.6746	23.3881	0.452	16.2829	0.2648	66.3247	0.2907	29.8515	0.9521	28.5925	0.5596	43.7016	0.5685	31.1254	0.971	20.6531	6.3161	12.5127	0.3283	30.1142	0.643	8.4362	0.9864
79969	ATAT1	alpha tubulin acetyltransferase 1	0.0882	0	0	0	0	0	0	0	0	0	0	0	0	0	0	0	0	0	0	0	0	0	0	0	0	0	0	0	0	0	0	0	0	0	0	0	0	0.1082	0	0.1915	0	0	0	0	0	0	0
10726	NUDC	nuclear distribution C homolog (A. nidulans)	1.7981	0.8999	3.7954	1.6799	0.8522	1.1784	1.0886	0.3315	8.3024	4.6961	2.8226	1.8995	12.1717	1.6459	0.8028	1.387	0.6924	0.795	7.0187	0.1975	4.1166	3.4334	0.1912	0.6363	7.1174	4.6967	0.4021	1.5726	0.7531	3.0884	1.2806	1.9081	0.5915	1.7232	0.8788	1.0581	0.5983	0.8656	0.9949	0.6924	5.2538	0.2418	1.9308	0.619	1.1507	1.2577	0.2008
3108	HLA-DMA	major histocompatibility complex, class II, DM alpha	0.2035	0	0.3893	0.2536	0.9851	0.1259	1.3744	0.1418	0.6013	0.1836	0.4555	0.0799	0.0719	0.2202	0.2729	0	0.7185	0.0252	0.1971	0.0869	0.2987	0.0588	0.7199	0.0366	0.6137	0.0698	0.3583	0	0.1605	0	0.1835	0.0899	0.2442	0.248	0.6641	0.0783	0.5377	0	0.6315	0.1803	0.1636	0	0.1108	0	0.591	0.1397	0.7797
51477	ISYNA1	inositol-3-phosphate synthase 1	0.3267	0.8607	0.259	0.5182	11.9214	2.3358	2.61	4.468	1.4683	0.8201	0.0801	0.5805	0.1026	0.9057	1.5014	1.8738	0.4151	1.305	0.1733	2.8444	1.1504	9.098	0.1978	2.6406	1.6453	2.3985	0.7533	1.5559	2.6915	4.0895	5.434	1.9973	2.205	6.9489	3.256	2.0266	1.446	2.5382	5.6602	4.1244	0.4612	0.5397	0.7452	0.4098	1.6788	5.0194	0.9015
2172	FABP6	fatty acid binding protein 6, ileal	8.5845	0	0.054	0	0.4842	0	1.7141	0	0.5569	0	0	0	0.0176	0	0	0	0	0	0	0	0	0	0	0	0	0	0	0	0	0	0	0	0	0	0	0	0	0	0	0	0	0	0	0	0	0	0
23567	ZNF346	zinc finger protein 346	0.0394	0	0	0	0.058	0	0	0.0211	0	0	0	0	0	0	0.0563	0.0234	0.0301	0.0123	0.0177	0	0	0	0.0425	0	0	0	0.0626	0	0	0	0	0	0.0138	0	0.0782	0.0999	0	0	0.0811	0.0684	0	0	0.1734	0	0	0.0205	0
9218	VAPA	VAMP (vesicle-associated membrane protein)-associated protein A, 33kDa	11.4607	3.3943	5.0155	5.2553	4.0267	3.5658	2.5192	15.4054	2.659	8.6604	1.8116	11.8363	4.9663	7.6218	5.945	6.8316	8.3152	2.396	1.8979	1.9022	5.1696	4.3016	2.5555	5.8421	3.2037	4.1417	2.167	3.6881	1.1116	4.697	2.6001	4.1745	0.5863	4.7321	2.3158	2.8221	1.3532	3.0659	2.4505	3.913	6.6131	1.4499	0.8863	7.3897	5.7706	19.4832	12.5649
840	CASP7	caspase 7, apoptosis-related cysteine peptidase	0.0768	0.0281	0.0095	0	0.4493	0.1512	0.2484	0.0227	0.1121	0.1159	0.0769	0.1532	0	0.0526	0.1582	0.1726	0.1085	0.0548	0.1006	0.0296	0.0745	0.0448	0.0275	0.031	0.019	0.0406	0.0926	0.1103	0	0.0194	0.1021	0.0333	0.1197	0.216	0.3166	0.9893	0.2015	0.1219	0.0965	0.0218	0	0	0.2447	0.0903	0.069	0.0525	0.077
7343	UBTF	upstream binding transcription factor, RNA polymerase I	1.1802	0.109	0.2067	0.2398	0.2276	0.4349	0.4938	0.5011	0.3985	0.8178	0.5094	0.5553	0.0264	0.2684	0.5274	0.4356	0.1831	0.1639	0.4019	0.0552	0.4352	0.4074	0.1446	0.3702	0.3781	0.1874	0.1655	0.1723	0.1734	0.2236	0.3058	0.2938	0.2266	0.7832	0.3974	0.2411	0.3677	0.3082	0.1873	0.1638	0.3386	0.0256	0.3642	0.3775	0.0994	0.7771	0.1372
5297	PI4KA	phosphatidylinositol 4-kinase, catalytic, alpha	0.137	0.0734	0.0924	0.168	0.2387	0.1659	0.1314	0.2119	0.1509	0.2746	0.1229	0.393	0.008	0.3389	0.0673	0.2412	0.0704	0.0665	0.0277	0.0316	0.1893	0.1914	0.0267	0.2014	0.1212	0.0462	0.0488	0.2118	0.0334	0.2744	0.0773	0.1337	0.0507	0.5579	0.1293	0.3504	0.0878	0.43	0.0444	0.0736	0.0474	0.0668	0.0446	0.1682	0.2136	0.1442	0.0425
2181	ACSL3	acyl-CoA synthetase long-chain family member 3	2.9805	0.336	1.4458	0.2296	1.5032	0.5623	0.9826	0.8254	1.6421	0.7211	1.0808	0.5695	0.2518	0.4894	1.4382	0.8977	2.39	0.5762	0.1624	0.0801	0.8254	0.3004	0.0617	0.6933	0.576	0.12	0.2687	0.3102	0.2427	1.0892	0.7594	0.4584	0.3989	0.3503	0.7499	0.3319	0.574	0.3502	0.3492	0.7131	1.6379	0.3423	0.6517	0.3066	1.7788	0.7058	0.7737
80856	KIAA1715	KIAA1715	3.8826	0.1341	8.5604	3.9231	1.8671	0.3361	4.0752	1.2919	3.0197	1.613	0.4961	3.8032	0.6963	1.2977	1.0394	0.8465	1.9113	0.0857	1.9987	0.0766	0.9079	0.2528	0.2107	0.1269	0.5163	0.1091	0.9143	0.4849	1.0213	1.1358	1.4222	0.6655	0.5794	0.6442	1.4099	0.7414	1.3699	0.8571	0.9141	0.3721	0.9008	1.0033	1.3619	0.2226	1.8631	0.1496	0.9602
55218	EXD2	exonuclease 3'-5' domain containing 2	0.0072	0.0077	0.0579	0.0029	0.0083	0.044	0.0695	0.1556	0.0813	0.0969	0	0.0739	0	0.0305	0.0258	0.0322	0.0994	0.0224	0.0214	0.0103	0.0581	0.0353	0.0238	0.0547	0.0371	0	0.0198	0.111	0.0281	0.1627	0.0492	0.0658	0.0062	0.0495	0.0111	0.0441	0.0064	0.0736	0.0442	0.0427	0.0109	0.0116	0.0534	0.0248	0.0234	0.123	0
91289	LMF2	lipase maturation factor 2	0.0092	0.0099	1.9357	0.0263	0.2678	0.0499	0.5047	0.1305	0.0678	0.1632	0.0894	0.081	0.0517	0.0811	0.3977	0.0469	0.1903	0.0595	5.7668	0.0024	4.1964	1.3991	0.0566	0.028	6.2065	0.0453	0.0573	3.3393	1.8169	0.9547	2.6858	1.7756	2.3943	0.027	1.96	0.9191	0.8564	0.1243	2.0688	0.0619	0.0729	0.0632	0.0491	0.0201	0.2328	0.1723	0.2145
2687	GGT5	gamma-glutamyltransferase 5	0.281	2.6147	0.3294	7.6013	2.4128	11.394	0.4415	6.4817	0.078	29.069	0.8281	7.2666	0.0225	8.0015	4.3396	11.9335	1.2082	2.5879	0.1685	0.1899	1.781	8.6088	0.2894	6.6859	4.67	3.8764	0.6095	11.9494	0.2139	5.4314	1.0947	4.0526	0.5176	13.046	1.461	3.7296	1.5001	6.991	2.4819	3.458	1.1356	2.2427	0.5819	6.4376	0.2989	5.2861	0.4512
1666	DECR1	2,4-dienoyl CoA reductase 1, mitochondrial	17.9655	22.7793	2.4969	93.3224	18.0085	102.6	7.5069	50.176	28.1359	51.9488	12.2737	76.5334	0.5233	48.6885	4.704	84.5383	6.0178	28.3483	2.6005	13.9325	4.4424	52.6037	1.5379	114.648	4.4564	50.5819	4.1467	51.1529	3.9797	101.007	4.7917	111.531	3.0721	45.3511	14.057	62.3464	4.0357	48.7617	4.4515	20.4401	19.2774	40.6739	9.612	68.1808	4.8996	37.5983	1.4408
9114	ATP6V0D1	ATPase, H+ transporting, lysosomal 38kDa, V0 subunit d1	1.9368	3.7142	1.9469	15.4105	2.9446	6.5849	2.8579	2.5389	1.6755	8.8449	3.4537	6.3269	0.2186	3.9211	1.1208	5.5865	2.5081	0.7312	1.0428	0.3342	1.0373	7.8701	0.2872	5.9708	0.8576	5.6843	0.2727	1.1715	0.4175	4.664	0.3177	1.8211	0.5593	3.2176	0.9068	3.6422	0.5762	5.017	0.4438	3.2873	1.3337	6.8563	0.96	4.8152	2.5282	1.7006	0.9452
5550	PREP	prolyl endopeptidase	1.1981	0.4622	0.6109	0.3621	0.821	0.6799	1.2533	0.7832	0.9142	0.8988	1.0194	0.7815	0.077	0.3825	0.6862	0.7965	0.6178	0.3229	0.1563	0.165	0.6617	0.8481	0.1257	0.6259	0.9229	0.3305	0.2556	0.2059	0.3461	0.6433	0.7272	0.4512	0.2392	0.8107	1.0224	0.4865	0.7269	0.5362	0.8966	0.4699	0.522	0.5302	0.441	0.4279	0.5677	1.8592	0.5228
9820	CUL7	cullin 7	0.006	0	0	0	0.0119	0.0084	0.0292	0.0441	0.0021	0.0097	0.0491	0.0288	0.007	0.0021	0	0	0.0025	0.0189	0.0015	0.0022	0.0083	0.0123	0.0014	0.016	0.022	0.006	0.0321	0.0039	0.0059	0.0066	0.0215	0	0	0.0082	0.0121	0.0083	0.0045	0.0094	0.0011	0.0043	0	0.0035	0.0048	0.0105	0.0067	0.0056	0.0036
6403	SELP	selectin P (granule membrane protein 140kDa, antigen CD62)	0.0103	0	0	0	0	0	0	0	0	0	0	0	0.007	0	0	0	0	0	0	0	0	0	0	0	0	0	0.0035	0	0	0	0.0038	0	0	0	0	0	0	0	0	0	0	0	0	0	0.0169	0	0.0055
51780	KDM3B	lysine (K)-specific demethylase 3B	0.3003	0.0263	0.0041	0.0043	0.0058	0.0046	0.0238	0.0557	0.0196	0.0082	0.0162	0.0107	0.0034	0.0273	0.0297	0.0644	0.0165	0.0126	0.018	0.0031	0.004	0.0242	0.0028	0.0052	0.0144	0.0243	0.0074	0	0.0119	0.0115	0.0223	0.0624	0.0054	0.0339	0.0347	0.0265	0.0099	0.0033	0.0062	0.0083	0.0279	0	0.0268	0.0262	0.0249	0.015	0.0074
57020	C16orf62	chromosome 16 open reading frame 62	0.2358	0.6292	0.2172	0.4728	0.5606	0.5411	0.8332	0.4002	0.6094	1.3539	0.3711	0.7094	0.0428	0.7734	0.1576	1.4175	0.2818	0.0698	0.0764	0.0977	0.3077	0.6329	0.0763	0.8057	0.1485	0.3073	0.1535	0.364	0.1364	0.2359	0.2419	0.476	0.1828	0.3368	0.3614	0.4804	0.2792	0.5862	0.3842	0.1919	0.2826	0.447	0.3896	0.503	0.4984	0.1425	0.2345
33	ACADL	acyl-CoA dehydrogenase, long chain	0.2193	0.0084	2.3116	3.4244	11.4001	3.1972	3.0538	1.3177	7.091	2.7481	7.8001	3.0142	0.1098	0.9248	3.3565	7.0459	2.9827	0.9197	2.0345	1.3316	3.9378	4.8486	0.7177	2.7196	1.3609	2.1415	0.916	1.7913	1.2556	3.5164	1.6951	2.9708	1.3393	5.1752	1.652	1.6628	1.9887	4.7909	0	0.8572	8.1134	3.367	3.5798	3.7047	7.4085	0.8308	0.3841
8546	AP3B1	adaptor-related protein complex 3, beta 1 subunit	3.8533	0.7652	1.999	1.5773	1.9589	1.4427	1.8682	0.9012	0.7964	2.2462	1.4028	2.0753	0.0727	1.3054	1.8897	2.2139	2.0808	0.4497	1.607	0.7995	3.0619	3.3253	1.1693	1.8567	2.7987	1.2048	1.0481	0.8539	1.2109	1.1942	0.9455	0.8676	0.4354	1.3292	1.1634	1.0199	1.1579	1.0979	0.5835	0.6016	8.3367	0.6003	1.8935	1.4867	1.2178	0.6838	0.6412
173	AFM	afamin	0.7224	0.7948	1.3367	0.4086	1.9779	2.3271	0.947	0.9116	0.5621	0.1495	1.0385	0.779	0.2079	0.5092	0.9084	0.2292	2.264	0.5854	1.8317	0.9042	3.4271	1.4719	0.2	0.2649	0.9862	0.3839	1.6533	1.4474	3.2136	0.6114	2.4501	4.1086	0.4446	0.2768	1.9473	1.1506	1.1917	1.2823	0.8976	1.1966	1.8933	1.1822	0.7794	0.3749	1.7281	0.6858	1.0355
662	BNIP1	BCL2/adenovirus E1B 19kDa interacting protein 1	0.2595	0.1974	0.3655	0.2596	0.54	0.5554	0.808	1.1064	0.9503	0.2803	0.658	0.1807	0.0511	0.2997	0.1476	0.2045	0.3027	0.1512	0.5527	0.6032	0.7771	1.1174	0.0477	0.3933	0.8893	0.8032	0.4602	0.0598	0.0717	0.1183	0.2823	0.0999	0	0.1163	0.2888	0.308	0.1946	0.318	0.2684	0.3932	0.2459	0.19	0.0798	0.1197	0.3275	0.7	0.1877
10380	BPNT1	3'(2'), 5'-bisphosphate nucleotidase 1	4.3636	3.4236	0.7895	5.9542	1.7214	3.4873	2.6523	6.9356	1.5167	4.6282	2.6429	3.9911	0.3801	8.9814	1.5235	2.6263	0.9048	0.5798	1.0382	1.1137	2.0654	4.9683	0.6528	4.4261	1.8331	2.2806	1.2818	3.8463	1.6501	5.7191	1.8211	4.1493	0.7629	4.5584	2.3774	3.5399	0.8267	3.2392	2.6298	2.2067	2.3537	2.2845	3.4962	3.6702	1.541	4.2191	2.2529
23673	STX12	syntaxin 12	0.9795	0.9751	1.0641	0.7491	2.8953	2.5881	1.6453	0.6955	1.4218	2.2455	1.0479	1.1124	0.1799	1.3135	0.7874	3.8149	0.6947	0.8067	0.5632	0.1973	1.0859	0.9464	0.3128	0.7177	0.8835	0.2923	0.5344	0.8156	0.5294	1.744	0.6995	1.5074	1.1437	1.9722	1.8284	1.3449	1.0153	1.6046	1.5084	2.0922	0.9742	0.8717	0.7997	0.9253	2.183	1.806	0.8214
30008	EFEMP2	EGF containing fibulin-like extracellular matrix protein 2	0.0987	0.0453	0.0104	0.0308	0.211	0.3006	0.0953	0.2382	0.2049	0.3695	0.0458	0.2389	0	0.376	0.1762	0.0619	0.0627	0.0087	0.0405	0.3629	0.1298	0.2651	0	0.096	0.244	0.1751	0.032	0.0794	0	0.0996	0.0474	0.0575	0.1402	0.1497	0	0.1008	0.0545	0.2621	0.0997	0.0384	0.1441	0.1516	0.1747	0.1266	0.011	0.1001	0.009
64005	MYO1G	myosin IG	0.0566	0.0219	1.2319	0.0168	0.4817	0.0215	0.2934	0.0233	0.4748	0.2544	0.1994	0.0286	0.022	0.0481	0.1951	0.0217	0.0332	0.0042	0.0344	0.0012	0.2533	0.0286	0.0021	0.022	0.0628	0.0199	0.0492	0.0292	0.0528	0.0233	0.0267	0.0219	0.0922	0.0584	0.2158	0.0204	0.0956	0.0875	0.301	0.0173	0.2798	0.0131	0.098	0.017	0.2848	0.0208	0.2157
55108	BSDC1	BSD domain containing 1	0	0	0.0111	0	0.0944	0.0444	0.0944	0	0.0196	0.0672	0	0	0	0	0.0241	0.0831	0.008	0	0	0	0.0088	0.0061	0	0	0	0	0	0.0215	0.0238	0.0675	0.0247	0.0334	0.013	0	0.0538	0.0315	0.0324	0.0354	0.0139	0	0	0	0.173	0.006	0.0354	0.006	0
3040	HBA2	hemoglobin, alpha 2	9335.63	16927.9	9733.73	8126.53	8410.36	7847.46	7472.24	10979.4	3986.04	6530.81	3481.62	9678.78	25056.5	8653.25	11359.6	6931.16	11027.6	19807	15132.3	21462.2	7768.22	7477.08	20003.4	9329.52	11358.4	14230.7	14190.6	13221.1	17422.1	6639.04	12383.1	8482.85	21667.8	9588.41	13074.6	12284.3	17091.2	10723.2	13108.2	15854.8	6225.92	16777.6	4178.66	11125.6	16089.3	10208.3	18192.3
5529	PPP2R5E	protein phosphatase 2, regulatory subunit B', epsilon isoform	0.523	0.1089	0.0592	0.0192	0.0692	0.4845	0.0792	0.0244	0.092	0.2258	0	0.0449	0	0.2024	0.3136	0.1667	0.2549	0.0389	0.0523	0.0298	0.4098	0.1608	0.0094	0.4078	0.4461	0.0426	0.0531	0.0083	0.154	0.1532	0.1602	0.1135	0.0353	0.2021	0.2645	0.1439	0.2263	0.1079	0.3021	0.075	0.0417	0.0594	0.3178	0.153	0.1837	0.3369	0.1256
115939	TSR3	TSR3, 20S rRNA accumulation, homolog (S. cerevisiae)	0.0369	0	0	0	0	0	0	0	0	0	0.0049	0	0	0	0	0	0	0	0	0	0	0	0	0	0	0	0	0	0	0	0	0	0	0	0	0	0	0	0	0	0	0	0	0	0	0	0
100996747	LOC100996747	40S ribosomal protein S26-like	1.9759	0.1642	0.2782	0	0	0.1436	0.0315	0.114	0.0763	0.1094	0.1035	0.2501	0.0099	0.0322	0.0154	0	0.0371	0	0	0	0.1912	1.505	0.0532	0.2768	0.1867	1.2923	0.2618	0	0	0.2299	0.0458	0	0.1875	0.3478	0	0.184	0.1222	0	0.2991	0.1141	0.057	0	0.0333	0.0131	0	0	0
55788	LMBRD1	LMBR1 domain containing 1	0.0567	0	0	0	0.052	0.1148	0	0	0	0.0796	0	0.4301	0	0	0	0	0	0	0	0	0	0	0	0	0	0	0	0.0719	0	0.1086	0	0	0	0	0	0	0	0.0948	0	0.0822	0	0	0	0	0.0256	0.0532	0
474384	F8A3	coagulation factor VIII-associated 3	0.0402	0	0	0.1731	0.0189	0.0139	0.0132	0	0	0	0	0	0	0	0.0553	0.0809	0.029	0.0354	0	0	0.0049	0.0473	0	0.0389	0	0	0	0.0357	0.0059	0.0063	0.0089	0	0	0.028	0.0079	0.038	0.01	0.0249	0.0162	0.0105	0.0182	0	0.0059	0	0.0387	0	0
55291	PPP6R3	protein phosphatase 6, regulatory subunit 3	1.2255	0.2008	0.1142	0.0864	1.5879	0.269	0.3153	0.3213	1.0096	0.4145	0.1965	0.7205	0.0188	0.1708	0.5414	0.1263	0.2219	0.089	0.2945	0.7291	0.2072	0.3964	0.0509	0.3003	0.056	0.0543	0.0762	0.0653	0.357	0.1078	0.303	0.1181	0.0673	0.1275	0.3055	0.0625	0.4328	0.1783	0.2286	0.0704	0.4926	0.1471	0.8827	0.1158	0.3595	0.1344	0.4893
8878	SQSTM1	sequestosome 1	0.1302	0.0149	0.6599	0.2172	0.188	0.0821	0.3075	0.0761	0.2683	0.4622	0.0498	0.2703	0.0759	0.9157	0.2759	0.0437	0.1064	0.0022	0.0065	0	0.3543	0.1339	0	0.1613	0.0189	0.4487	0.2641	0.2926	0.7515	0.0852	0.1157	0.5409	0.3847	0.3737	0.3594	0.4361	0.093	0.41	0.2277	0.3779	0.2215	0.0196	0.5952	0.2796	0.0318	0.1558	0.0321
90441	ZNF622	zinc finger protein 622	0.0454	0.0253	0.0032	0	0	0	0	0.0465	0.0101	0	0.0603	0	0	0	0	0	0.1194	0.0082	0	0	0	0.1874	0	0.6662	0	0	0	0	0	0	0	0	0	0	0	0	0	0	0	0	0	0	0.1358	0	0	0	0
348110	C15orf38	chromosome 15 open reading frame 38	0.4481	0.0797	0.1491	0.1061	0.1374	0.0661	0.1228	0.0184	0.1968	0.3481	0	0.061	0.0014	0.2529	0.1787	0.5125	0.1677	0.0577	0.2437	0.0968	0.2812	0.3023	0.1264	0.2642	0.2497	0.1427	0.108	0.0416	0.0783	0.1104	0.2122	0.0532	0.0506	0.0173	0.1805	0.1211	0.1451	0.0366	0.1553	0.0153	0.4243	0.0169	0.2718	0.0752	0.085	0.0567	0.0016
2049	EPHB3	EPH receptor B3	0.009	0	0.0012	0.0014	0	0.0055	0.0891	0.0393	0	0	0	0.0369	0	0	0	0.0063	0	0.0129	0	0.0093	0	0.0081	0.001	0	0.0041	0.001	0	0.0066	0	0	0.0007	0	0	0	0.002	0	0.0025	0.0839	0.0013	0	0	0	0	0	0	0.0042	0
51440	HPCAL4	hippocalcin like 4	0.2337	0	0	0	0	0.0145	0	0	0	0	0	0	0	0.0092	0	0	0	0	0	0	0	0	0	0	0	0	0	0	0	0	0	0	0	0	0	0	0	0	0	0.0132	0	0.0097	0	0	0	0	0
5341	PLEK	pleckstrin	0.2714	0.1734	0.2496	0.0298	0.6412	0	0.7785	0	2.1498	0.3464	0.4373	0	0.1152	0	0.9273	0	0.0241	0.0445	0.0489	0.0363	0.4644	0	0.0763	0.0579	0.275	0.029	0.2845	0	0.4473	0	0.0497	0.0912	0.5441	0.231	0.6326	0.1108	0.3749	0	0.5272	0.1807	0.0246	0	0.3133	0.0197	0.1014	0.0464	0.6335
3055	HCK	hemopoietic cell kinase	3.1634	0.0056	0.2419	0.0453	0.324	0.0656	0.3563	0.0328	0.1333	0.1	0.2562	0.0873	0.0012	0.0486	0.049	0	0.0331	0	0.1157	0.0095	0.1473	0.0285	0.0925	0.0277	0.1952	0.0065	0.0432	0.0317	0.0492	0.0524	0.0671	0.0398	0.0704	0.0616	0.971	0.0417	0.075	0.0548	0.1149	0.0436	0.1029	0.0295	0.1138	0.0318	0.4914	0.0431	0.1303
115294	PCMTD1	protein-L-isoaspartate (D-aspartate) O-methyltransferase domain containing 1	0.0441	0.0349	0.0128	0.0324	0	0.0514	0	0.0328	0	0	0	0.0292	0	0	0	0	0	0	0	0.0043	0.0459	0.089	0.0065	0.0552	0.0083	0.0661	0	0	0	0	0	0	0	0.0616	0	0.0428	0.0142	0	0.0163	0.0424	0	0	0.0154	0	0	0.0345	0
83638	C11orf68	chromosome 11 open reading frame 68	0.8867	0.0988	0.1252	0.1716	0.5745	0.1979	0.5298	0.0554	0.3071	0.2018	0.3826	0.3911	0	0.0932	0.4552	0.4423	0.4233	0.3131	0.2839	0.1287	0.3288	0.1452	0.0608	0.2997	0.3061	0.0771	0.3552	0.2927	0.3993	0.0791	0.5918	0.2449	0.2517	0.468	0.7937	0.3458	0.5201	0.3646	0.6408	0.2123	0.2553	0.0135	1.1431	0.1264	0.5566	0.6803	0.2288
5708	PSMD2	proteasome (prosome, macropain) 26S subunit, non-ATPase, 2	2.373	0.9749	1.3704	1.5229	2.2013	2.2241	3.5278	1.1269	1.516	1.8377	5.3622	1.5578	0.6131	1.6306	1.8232	1.7654	0.8341	1.0114	0.9097	0.3515	2.0377	1.3481	0.6642	1.8444	2.1577	0.8553	0.9773	1.0965	0.941	1.8446	1.5667	1.3903	0.8466	1.5658	1.9891	1.4607	1.6314	1.3928	1.2298	1.1145	3.2853	1.2582	4.4981	1.9604	3.2342	2.218	2.2533
256979	SUN3	Sad1 and UNC84 domain containing 3	0.1668	0	0	0	0	0	0	0	0	0	0	0.425	0	0	0	0	0	0	0.0088	0	0	0	0	0	0.0672	0	0	0	0	0	0	0	0	0	0	0	0	0	0	0	0	0	0	0.0664	0	0	0
23074	UHRF1BP1L	UHRF1 binding protein 1-like	0.0036	0	0	0	0.0038	0	0	0	0	0.0166	0.0381	0.0167	0	0	0	0	0	0	0	0	0	0.0137	0	0	0.0037	0.0164	0	0	0	0	0	0.0158	0	0	0	0	0	0	0	0	0	0.0058	0	0.0104	0	0	0
5208	PFKFB2	6-phosphofructo-2-kinase/fructose-2,6-biphosphatase 2	0.0591	0.7238	0.0397	1.174	0.0216	3.5077	0.0726	0.2261	0.0642	0.5427	0.0608	1.1752	0.0016	0.9767	0.0161	0.5332	0.0138	0.0628	0.0027	0.0571	0.006	0.8014	0	1.5136	0.0169	0.576	0.0049	1.0031	0.0038	4.3341	0.0055	2.6674	0.0025	0.4291	0.0056	0.5924	0.0293	0.9586	0.0047	0.3343	0	0.5111	0.0913	0.6734	0.7607	0.2795	0.0086
1832	DSP	desmoplakin	0.5168	0.3566	1.789	1.2022	1.5832	0.7654	0.1077	0.8269	0.5174	1.4737	3.1258	1.3029	0.0555	1.1623	2.0004	0.8657	0.5844	0.6605	0.9042	0.1203	2.2595	2.1781	0.1044	1.89	0.0005	1.4127	0.5042	0.3916	0.0049	0.7032	0.0026	0.3563	0.1116	0.6805	0.0014	0.3423	0.4619	1.0565	0.0624	0.3321	0.2234	0.602	0.1122	0.8993	0.0415	0.3154	0.0431
23353	SUN1	Sad1 and UNC84 domain containing 1	8.4271	0.0565	0.6745	1.2479	0.1759	0.6353	0.2616	0.29	0.1983	0.3023	0.2299	0.4719	0.0122	0.1074	0.269	0.2633	0.3046	0.3279	0.3529	0.0608	1.7394	0.4698	0.7524	6.555	0.3241	0.1804	0.2726	0.4239	0.2081	0.2506	0.3178	0.0752	0.1668	0.1857	0.7471	0.2818	0.3365	0.1991	0.2038	0.1154	0.4775	0.147	0.9664	0.0552	0.9724	0.3998	0.125
10809	STARD10	StAR-related lipid transfer (START) domain containing 10	0.1177	1.5162	0.1714	1.7875	0	0.3649	0.6564	1.1679	0	1.9185	0.1897	1.3067	0.0916	1.0091	0.5776	1.2646	0.0991	0.7982	0.1103	0.2891	0.3394	1.2918	0	0.9037	0.1413	0.7821	0.0428	0.3523	0.019	2.1233	0.0678	0.0669	0.1325	1.4502	0	0.3477	0.2445	0.4983	0.128	0.9881	0.0519	0.4179	0.2146	0.1081	0.2208	1.2379	0.3336
10682	EBP	emopamil binding protein (sterol isomerase)	1.1981	0.9866	0.3167	1.241	0.9082	0.8783	2.0572	0.7024	2.4879	2.3656	0.4764	1.6933	0.1833	1.661	0.5085	2.2867	1.0707	0.5088	1.038	0.2099	0.3156	3.8636	0.1219	1.6722	0.3548	1.8562	0.2471	0.9096	0.2511	1.5166	0.1869	1.5411	0.1223	0.8191	0.3595	0.9628	0.1707	1.2246	0.232	0.4159	0.8586	1.0937	0.3881	0.665	0.7792	0.9877	0.3561
10920	COPS8	COP9 signalosome subunit 8	1.6379	0.2453	0.7854	1.0236	3.3143	11.7839	1.5945	0.9137	1.5991	2.1734	1.1065	0.4843	0.2173	1.4042	0.8773	1.6769	0.5518	0.1843	0.9066	0.2576	1.094	0.9476	0.1704	1.2088	0.8337	0.1723	0.5385	2.1955	0.1949	1.3499	2.485	4.5189	0.9222	9.1773	6.0971	4.6161	4.6342	29.4424	4.7492	0.406	0.9217	0	0.7832	0.8082	0.4403	1.3186	0.9377
89	ACTN3	actinin, alpha 3	5.2078	3.4138	7.4373	6.3795	9.0106	6.9605	14.5563	9.6592	8.0707	12.5215	4.0285	6.3293	1.0035	6.6074	4.5339	4.397	3.3662	1.2995	1.2566	1.4645	3.1103	3.2711	1.847	3.8144	4.0521	2.4826	4.7279	5.9593	2.0546	8.026	5.6102	5.5733	2.0536	5.2886	3.2248	4.0691	3.8818	5.7747	4.6667	4.2202	2.8359	3.1771	8.721	4.7813	1.941	4.0421	1.5083
23430	TPSD1	tryptase delta 1	1.7244	0.0509	9.3889	0.0558	0.3849	0.0356	0.3969	0.6289	0.8968	0	0.8138	0.195	0.4801	1.9148	6.3486	0.5655	2.9555	0.1737	0.9763	0.0215	15.2148	0.7774	2.6884	1.0807	3.9289	0.6331	3.2883	1.2178	1.0457	0.1209	2.5869	0.9655	2.637	1.7704	2.9689	0.5161	3.7075	0.9527	3.0705	0.5992	1.7707	0	0.4606	0.1706	0.1825	0.7851	2.5123
2287	FKBP3	FK506 binding protein 3, 25kDa	6.277	3.5322	3.2936	4.2202	2.7161	2.3118	5.6385	3.3718	3.5979	11.2121	2.3029	6.7617	0.9323	6.9557	4.4112	4.3837	3.4578	2.1205	4.1822	2.035	3.3044	8.5797	1.2946	5.6143	2.7699	6.3918	1.2888	1.4787	2.7702	4.1635	2.289	1.745	1.7404	3.4582	2.2971	2.2633	1.3538	1.163	2.3021	1.4775	5.729	3.2643	6.9169	3.2664	1.5522	4.7248	1.7687
57418	WDR18	WD repeat domain 18	0.0737	0.0326	0.0421	0.0282	0.6562	0.0178	0.4695	0.0769	0.0332	0.2868	0.1556	0.1663	0.0126	0.082	0.2672	0.4799	0.4328	0.1768	0.2323	0	0.035	0	0.023	0.2951	0.022	0.013	0.1646	0.0847	0.0854	0	0.1991	0.0637	0.0574	0.1016	0.0706	0.0795	0.164	0.0814	0.1079	0.1111	0.4111	0.0342	0.4677	0	0.0624	0.1757	0.0462
135154	C6orf57	chromosome 6 open reading frame 57	2.0103	0.0941	0	0	0	0	0	0	0	0	0.2931	0	0	0	0	0	0	0	0	0	0	0	0	0	0	0	0	0	0	0	0	0	0	0	0	0	0	0	0	0	0	0.0366	0	0	0	0	0
79443	FYCO1	FYVE and coiled-coil domain containing 1	0.0733	0.0209	0.0189	0.1064	0.0701	0.048	0.1342	0.3442	0.0359	0.2118	0.0874	0.443	0.0066	0.0927	0.1053	0.0816	0	0.0409	0.0014	0.0039	0.0924	0.6442	0.0046	0.1397	0.0215	0.3303	0.0036	0.0525	0.007	0.0886	0.0487	0.0807	0.0059	0.1674	0.014	0.2609	0.0679	0.2597	0.0623	0.0432	0.2023	0.1466	0.0214	0.0285	0.0821	0.1093	0.0227
10856	RUVBL2	RuvB-like 2 (E. coli)	10.2372	2.2275	1.8143	3.1672	2.2815	3.4347	3.3808	4.3063	8.3008	3.8311	7.6938	3.1293	0.5326	4.0728	3.0743	4.0697	2.5157	1.8637	2.1416	1.1891	2.6147	6.6549	1.2456	4.8384	2.0359	2.6346	1.6796	1.1962	1.3933	4.0975	1.9448	3.0837	1.4549	5.1791	1.587	3.3903	1.7755	3.5323	2.355	2.7369	3.0838	0.4589	2.7429	2.1413	0.6605	3.8813	1.4795
84418	CYSTM1	cysteine-rich transmembrane module containing 1	1.8727	0.4468	0.7226	2.0775	0	0.4109	0.3005	0.9157	0.2233	0	0.2141	0.8729	0.1209	0.9373	0.0942	1.3322	0.3972	0.2451	0.3968	1.3667	0.7336	0	0	1.9736	0.3277	0	0.434	0	0	0	0	0	0.3642	0.8577	0	0	0	0.5896	0.2653	0.3821	0	0	0	0.3886	0	0.3924	0.2289
4763	NF1	neurofibromin 1	0.2358	0.0348	0.0079	0.0265	0.0386	0.0251	0.1573	0.0133	0.0921	0.0148	0.0618	0.0787	0.0012	0.0555	0.0276	0.0022	0.0174	0.0259	0.0176	0	0.0347	0.0853	0.0075	0.0438	0.0518	0.0324	0.0033	0.0145	0.009	0.0096	0.0156	0.0257	0.0039	0.0134	0.0387	0.0159	0.0251	0.0516	0.0307	0.0131	0.01	0	0	0.0096	0.1316	0.0215	0.0065
5608	MAP2K6	mitogen-activated protein kinase kinase 6	0.1416	0.1252	0.0039	0.4599	0.334	0.1701	0.0906	0.3362	0.2545	0.8035	0.1453	0.5121	0	0.1943	0.3561	0.2871	0.0277	0.036	0.1279	0.1372	0.2345	0.5486	0.0255	0.133	0.2791	0.1148	0.0301	0.1604	0.0644	0.4559	0.1233	0.1765	0.0589	0.5044	0.2057	0.2721	0.1155	0.1955	0.2956	0.019	0.4104	0.0093	0.1316	0.3276	0.0288	0.9449	0.1034
8368	HIST1H4L	histone cluster 1, H4l	45.0841	20.3415	253.594	194.84	251.097	132.489	64.8496	45.8245	181.018	387.16	317.735	60.0252	22.2823	35.7052	349.848	167.609	257.572	117.165	142.745	80.1824	363.609	60.7999	95.7306	51.6642	205.655	70.7305	282.854	159.129	199.524	61.7923	261.708	114.649	131.833	219.54	281.903	103.493	153.259	72.4884	260.199	132.737	199.59	2.2379	92.3212	5.6023	103.173	194.476	87.5775
51072	MEMO1	mediator of cell motility 1	0.2977	0.1086	0.0672	0.098	0.2171	0.0464	0.1254	0.0838	0.3557	0.2296	0.2093	0.0808	0.0089	0.091	0.0733	0.2684	0.4909	0.0306	0.0405	0	0.0188	0.0895	0.0022	0.1689	0.0332	0.0713	0	0.0364	0.0115	0.2337	0.0149	0.066	0.0063	0.1492	0.0594	0.1171	0.0678	0.1903	0.1496	0.1179	0	0.0857	0	0.0344	0.0437	0.1147	0.0422
8675	STX16	syntaxin 16	1.3228	0.052	0.1347	0.2158	0.1629	0.1937	0.274	0.3705	0.7312	0.1054	0.1477	0.3481	0.0362	0	0.1372	0.0825	0.0934	0.0334	0.9391	0.1858	0.2824	0.4232	0.0417	0.2991	0.0565	0.0392	0.6645	0.048	0.5088	0.0791	0.0671	0.1127	0.0575	0.1057	0.2665	0.1538	0.1087	0.0968	0.1129	0.1578	0.1362	0	0.1099	0.013	0	0.1559	0
3163	HMOX2	heme oxygenase (decycling) 2	1.0346	1.0715	1.8214	1.5411	3.4753	2.1136	2.2693	1.939	0.7724	0.8955	0.107	2.0437	0.3363	1.883	1.1453	2.091	0.9949	0.5725	0.6979	0.4674	0.8	0.9803	0.2031	0.447	0.364	1.2718	0.3239	0.9357	0.3749	1.2747	0.2077	1.156	0.2994	0.6551	0.8102	1.0208	0.4918	0.951	0.5428	0.6244	1.2327	0.7833	1.0298	0.4969	0.4813	0.9149	0.3286
56943	ENY2	enhancer of yellow 2 homolog (Drosophila)	0.5826	0.239	0.3295	0.2951	0.3173	0.0743	1.248	0.6413	0.683	0.6386	0.3879	0.9128	0.0179	0.3832	0.3599	0.3003	0.1695	0.1652	0.2152	0.1887	0.5794	0.5065	0.2908	0.2262	0.3788	0.2925	0.1296	0.2252	0	0.3708	0.2404	0.4123	0.3007	0.7478	0.1547	0.2821	0.0388	0.5515	0.3403	0.3201	1.5413	0.4194	0	0.2805	0.4614	0.495	0.3616
51160	VPS28	vacuolar protein sorting 28 homolog (S. cerevisiae)	0.9444	0.4206	0.2132	0.2934	1.8939	0.3555	1.0735	0.5049	0.4508	0.6157	0.5093	0.579	0.2817	0.6935	0.9119	0.5744	0.4959	0.3957	0.1072	0.1228	0.8538	2.8809	0.1243	0.3789	0.4818	0.4019	0.1956	0.1216	0.2926	1.4778	0.4769	0.1464	0.3005	0.8513	0.2818	0.5862	0.7652	0.4452	0.4261	0.3653	0.6099	0.129	0.7299	0.2778	0.3363	0.8209	0.3785
3716	JAK1	Janus kinase 1	0.0076	0.02	0.0481	0	0.5099	0	0.0948	0.029	0.0733	0.0417	0.2499	0.0255	0.008	0.0487	0.0751	0.0372	0.0719	0.0401	0.0142	0.0023	0.0866	0.0446	0.0436	0.0252	0.0635	0.0433	0.1377	0.0212	0.0458	0.0302	0.0739	0.0357	0.0251	0.0417	0.2942	0.0094	0.1035	0.0635	0.0833	0.0376	0.0451	0.005	0.1762	0	0.0347	0.0252	0.1283
89122	TRIM4	tripartite motif containing 4	0.0608	0.335	0.0189	0.0634	0.06	0.0509	0.169	0.3519	0.1562	0.0346	0.0612	0.1903	0	0.9854	0.0899	0.0457	0.0087	0.0443	0.0226	0.0136	0.0942	0.0639	0.3047	0.087	0.0301	1.0376	0.1489	0.0378	0.1356	0.0488	0.0471	0.041	0.0283	0.0295	0.5657	0.3156	0.0717	0.0616	0.0995	0.3688	0.0313	0.0416	0.2349	0.0198	0.028	0.3803	0.0087
6175	RPLP0	ribosomal protein, large, P0	25.111	10.1135	14.8005	14.4738	23.4024	18.6346	57.8941	20.1648	36.5293	33.3324	52.1575	21.0948	5.283	33.6747	10.9138	15.5735	12.4616	6.5477	20.1618	6.2296	17.0211	27.6944	5.2314	21.1542	12.7161	10.6596	11.4563	9.5954	15.7236	19.7584	21.6914	7.559	12.8355	26.5737	25.1131	19.2133	22.4735	18.2213	30.2283	16.6749	14.0004	4.0183	34.753	11.3031	28.2741	27.696	11.1958
81858	SHARPIN	SHANK-associated RH domain interactor	0.1826	0	0	0.0265	0.0324	0	0	1.3641	0	0	0	0	0	0	0	0	0	0	0	0	0.0247	0.04	0.0062	0.0136	0.018	0.0213	0	0.0154	0.0352	0.0202	0.0565	0.0131	0.0008	0.0337	0.0361	0	0.0293	0	0.0335	0	0	0.0514	0	0	0	0	0
6515	SLC2A3	solute carrier family 2 (facilitated glucose transporter), member 3	0.5014	0	0.4585	0	0.4156	0	0.178	0.0057	0.8088	0	0.448	0	0.0259	0	0.0457	0	0.2414	0	1.0723	0	0.1921	0	0.0935	0	0.2053	0	0.3669	0.0052	0.2048	0	0.4056	0.0164	0.1667	0.0059	0.497	0.0036	0.1179	0.0111	0.2064	0.0149	0.0384	0	0.147	0	0.4307	0.0139	0.1305
26065	LSM14A	LSM14A, SCD6 homolog A (S. cerevisiae)	0.5678	0.0779	0.0586	0.0851	0.3306	0.0994	0.2045	0.229	0.2928	0.4637	0.1107	0.1447	0.054	0.1894	0.1314	0.0868	0.1093	0.067	0.1481	0.0451	0.2001	0.1844	0.0283	0.1508	0.1018	0.0955	0.0584	0.0716	0.1058	0.1346	0.2019	0.0974	0.0749	0.3172	0.1692	0.1637	0.1739	0.2151	0.3021	0.1484	0.1349	0.0348	0.3002	0.0563	0.1274	0.2442	0.0845
8939	FUBP3	far upstream element (FUSE) binding protein 3	1.0723	0.2151	2.9934	1.8107	1.4061	1.6426	2.1361	0.5778	1.2634	1.5577	0.3041	1.7647	0.1091	0.5189	1.0827	2.2337	1.9525	0.2245	1.0705	0.4882	1.491	0.7795	0.4491	0.3109	1.2961	0.5328	0.5097	0.4857	0.4882	0.6377	0.9741	0.5011	0.4793	0.4976	0.8449	0.4319	0.5389	0.6306	0.422	0.4071	2.2519	0.4049	2.2033	0.6344	0.7813	0.6157	0.3281
3692	EIF6	eukaryotic translation initiation factor 6	10.0063	5.4058	10.1015	6.6632	12.2132	9.1271	11.9604	4.7621	33.4369	8.9973	27.6936	8.0085	0.8193	5.4645	8.2515	7.6985	4.6393	1.8228	4.0972	0.6538	7.1238	8.0773	1.9936	4.8355	4.1442	3.7114	4.1827	5.1518	4.1509	8.7443	7.1279	5.4247	3.0129	5.8363	5.5337	5.2124	3.8777	6.3109	6.7727	3.0644	24.3085	1.8341	16.072	6.7685	2.4706	3.8792	2.813
6505	SLC1A1	solute carrier family 1 (neuronal/epithelial high affinity glutamate transporter, system Xag), member 1	0.0423	0.1828	0.3534	0.3444	1.0897	0.5766	0.6132	0.3234	0.0855	0.3595	0.0899	0.342	0.0074	0.3615	0.0136	0.7129	0.0328	0.0102	0.0177	0	0.0081	0.4242	0.0049	0.2599	0.0356	0.1745	0.0793	0.2374	0.189	0.3146	0.2433	0.9028	0.0289	0.3552	0.9603	0.4099	0.1172	0.2291	0.0192	0.1947	0.0771	1.1606	0.0378	0.447	0.1893	0.0691	0.0795
10528	NOP56	NOP56 ribonucleoprotein	2.6703	0.1457	1.3062	0.232	1.0377	0.3356	0.9119	0.6938	1.1584	0.1947	1.3338	0.103	0.1332	0.222	0.1958	0.1434	0.1741	0.0165	0.7682	0.3449	0.7499	0.4509	0.5905	0.3136	0.543	0.3536	0.2922	0.1791	0.6333	0.8178	0.61	0.1398	0.6692	0.8054	1.3359	0.3337	0.9564	0.3348	0.896	0.4609	1.8153	0	0.7662	0.0507	0.4245	0.3709	0.2051
8363	HIST1H4J	histone cluster 1, H4j	45.0841	20.3415	253.594	194.84	251.097	132.489	64.8496	45.8245	181.018	387.16	317.735	60.0252	22.2823	35.7052	349.848	167.609	257.572	117.165	142.745	80.1824	363.609	60.7999	95.7306	51.6642	205.655	70.7305	282.854	159.129	199.524	61.7923	261.708	114.649	131.833	219.54	281.903	103.493	153.259	72.4884	260.199	132.737	199.59	2.2379	92.3212	5.6023	103.173	194.476	87.5775
9158	FIBP	fibroblast growth factor (acidic) intracellular binding protein	0.6046	0.4209	0.1395	0.1766	0.241	0.0785	2.6295	1.609	0.4274	0.2959	6.0254	0.5568	0.0827	0.3157	0.1113	2.8913	0.0653	0.0594	0.1002	0.0096	0.325	0.5748	0.1313	0.2589	0.2083	0.1956	0.1268	0.0988	0.1918	0.4916	0.102	0.0352	0.1008	0.4016	0.1627	0.3061	0.1638	0.2076	0.1743	0.0596	0.0448	0.3797	0.2728	0.2617	0.1778	0.4247	0.1362
100528021	ST20-MTHFS	ST20-MTHFS readthrough	0.2238	1.2379	0.2301	1.5519	0.3827	2.1207	0.1226	0.5658	0.2808	0.6531	0.4825	2.323	0.1062	2.4575	0.1635	1.6925	0.3171	0.2278	0.104	0.1446	0.0732	1.3235	0.0622	1.9363	0.2088	2.007	0.0487	1.0586	0.1233	4.0497	0.086	1.1175	0.0454	0.9876	0.2082	2.1938	0.0892	1.1689	0.1557	0.6124	1.0138	0.4187	0.2058	0.9347	0.1005	0.5469	0.073
6249	CLIP1	CAP-GLY domain containing linker protein 1	1.7767	0.4404	0.7259	0.7237	0.9639	1.6155	0.6334	0.1973	1.0858	0.6032	1.0612	1.7327	0.0095	0.926	0.0462	0.0792	0.411	0.4924	0.2946	0.0461	0.374	0.7677	0.0581	0.7231	0.0903	0.7041	0.4038	0.0991	0.1229	0.6665	0.3692	0.1816	0.0246	0.1599	0.0309	0.4981	0.0622	0.4404	0.656	0.1805	0.1396	0.0336	0.9835	0.5746	0.183	0.0757	0.0579
4253	CTAGE5	CTAGE family, member 5	0.0783	0.1685	0.2473	0.3131	0.0923	0.4305	0.2458	0.0455	0.6363	0.3829	0.0767	0.4602	0.0095	0.1075	0.141	0.7213	0.1704	0.0081	0.102	0.0061	0.161	0.3539	0.0221	0.1168	0.0662	0.1003	0.0641	0.2139	0.0809	0.2843	0.117	0.3115	0.0503	0.0641	0.1794	0.2596	0.082	0.3104	0.1169	0.1722	0.2541	0.0831	0.1433	0.2487	0.2353	0.1677	0.0981
116840	CNTROB	centrobin, centrosomal BRCA2 interacting protein	0	0	0	0	0	0	0	0.0115	0	0	0.0088	0	0	0	0	0	0	0	0	0	0	0	0	0	0	0	0	0	0.0039	0.0316	0.0074	0	0	0	0	0	0	0	0.0066	0	0	0	0	0	0	0	0.0085
6252	RTN1	reticulon 1	0.2179	0	0.456	0.0138	0.4326	0.0083	0.1892	0	0.1415	0.3161	0.0048	0.0052	0.0019	0.1103	0	0	0.2376	0	0.0114	0	0.4809	0.0045	0.0022	0	0.0159	0.002	0.0276	0.0727	0.0025	0	0	0.0089	0.0505	0.0126	0.0676	0	0.0128	0.0067	0.0244	0	0	0	0.0074	0.0019	0.0213	0.0046	0.0067
5690	PSMB2	proteasome (prosome, macropain) subunit, beta type, 2	25.2443	1.6614	2.7513	0.9439	1.889	3.0992	3.1457	1.1512	3.1948	2.0035	2.7985	1.5198	0.7146	1.8422	1.5153	1.0879	1.0846	0.6446	2.2232	0.2661	4.3769	2.89	1.2498	1.4722	1.6489	1.3987	3.9424	2.6484	3.1033	4.5281	5.6316	4.3425	2.2723	5.4575	8.4794	2.9872	3.9323	4.1165	7.4127	2.4144	2.1338	1.826	1.8993	1.1014	2.2874	0.9807	1.9476
6648	SOD2	superoxide dismutase 2, mitochondrial	116.801	34.2289	671.701	54.5689	915.439	86.6084	199.152	40.5669	415.091	35.5133	164.222	12.3115	25.4844	38.0152	87.3987	40.2886	57.0284	8.3054	26.2044	11.3385	42.0943	54.6695	91.6474	32.7162	164.439	48.4787	65.2735	73.3395	169.76	61.6502	101.593	39.9577	59.4208	37.8701	222.993	66.263	50.9228	49.5612	424.568	20.6549	394.618	19.4694	99.7692	26.0833	34.1805	52.2666	154.877
100130958	SYCE1L	synaptonemal complex central element protein 1-like	0.0149	0	0	0	0	0.02	0	0	0	0	0	0	0	0	0	0	0	0	0	0	0	0	0	0	0	0	0	0	0	0	0	0	0	0	0	0	0	0	0	0	0	0	0	0	0	0	0
10174	SORBS3	sorbin and SH3 domain containing 3	0.3393	0.9339	0.9382	1.4451	2.3931	2.1469	1.2642	2.8802	1.0912	5.0092	0.7336	1.2196	0.0795	4.3076	3.2536	2.5525	0.8117	0.6136	0.6562	0.6195	0.9822	1.6431	0.4992	0.9843	0.742	0.739	0.7236	1.6012	0.292	1.2151	0.8081	0.9616	0.5795	2.3028	0.4108	1.624	1.805	2.3474	1.4284	0.7325	0.274	1.089	1.7135	2.1727	1.7441	3.3633	0.8578
515	ATP5F1	ATP synthase, H+ transporting, mitochondrial Fo complex, subunit B1	6.2759	16.188	9.4727	32.913	13.1678	31.7075	12.8399	47.8264	12.1798	14.2932	17.6495	21.6596	0.6601	25.4799	7.5615	42.8256	12.339	23.4294	5.5246	10.1967	9.4159	45.6194	2.2757	32.9362	7.8229	28.7781	2.9039	29.4063	3.2622	36.3191	14.3162	40.1843	1.6375	27.8846	10.6155	23.5186	3.1964	29.9659	9.1684	15.9072	9.7158	12.5106	7.3319	20.0918	7.5688	54.2514	4.5355
8362	HIST1H4K	histone cluster 1, H4k	45.0841	20.3415	253.594	194.84	251.097	132.489	64.8496	45.8245	181.018	387.16	317.735	60.0252	22.2823	35.7052	349.848	167.609	257.572	117.165	142.745	80.1824	363.609	60.7999	95.7306	51.6642	205.655	70.7305	282.854	159.129	199.524	61.7923	261.708	114.649	131.833	219.54	281.903	103.493	153.259	72.4884	260.199	132.737	199.59	2.2379	92.3212	5.6023	103.173	194.476	87.5775
9027	NAT8	N-acetyltransferase 8 (GCN5-related, putative)	3.7109	18.981	2.2388	92.0863	3.9851	101.806	7.1654	35.8784	0.1024	26.2707	0.3651	77.3923	0.6896	144.599	2.9753	60.4845	3.0743	1.3433	1.1009	0.0977	2.2792	98.844	0.4741	59.3035	1.6165	44.9254	1.8016	62.3889	0.6436	121.458	0.7726	81.2948	2.1222	19.7698	3.3889	78.3602	3.5263	61.7997	4.1793	16.6971	4.6497	74.6777	1.511	100.764	1.2463	6.4519	1.4636
84129	ACAD11	acyl-CoA dehydrogenase family, member 11	3.0061	1.4684	0.9102	2.6702	2.1785	4.1946	1.339	1.388	4.6196	1.9646	1.7381	2.333	0.7893	1.7774	1.0057	1.3247	3.2015	0.1352	1.7276	0	2.7191	3.1573	0.3041	0.5605	2.2807	1.2017	1.4984	1.5721	2.5097	3.7196	1.6143	2.4673	1.5797	1.3771	4.8074	2.0459	2.7647	2.8756	2.8099	0.8756	10.8231	1.7076	0.0297	1.8346	1.4129	0.6099	2.3769
5606	MAP2K3	mitogen-activated protein kinase kinase 3	1.9742	0.4116	0.0779	0.4304	0.1211	0.2306	0.1522	0.1081	1.2826	1.2402	0.2212	0.3459	0.01	0.2486	0.1018	0.1976	0.0491	0.0631	0.0677	0.0605	1.1087	0.7876	0.0176	0.3403	0.2751	0.2909	0.0695	0.2142	0.13	0.2195	0.1452	0.0531	0.0918	0.211	0.1707	0.2441	0.2312	0.3368	0.2682	0.1131	0.4085	0.0776	0.1547	0.0812	0.0068	0.6144	0.1904
2201	FBN2	fibrillin 2	0	0.0111	0.1148	0.0738	0.1523	0.0538	0.2217	0.0412	0.0557	0.1378	0.1339	0.0395	0.0066	0.049	0.0588	0.0582	0.037	0.0069	0.0792	0.0277	0.267	0.0701	0.0177	0.0535	0.1657	0.0383	0.0775	0.0748	0.0301	0.0931	0.0242	0.0711	0.0501	0.1271	0.1367	0.091	0.0683	0.0918	0.0892	0.0215	0.1405	0.0396	0.1308	0.0316	0.0209	0.0441	0.0259
60489	APOBEC3G	apolipoprotein B mRNA editing enzyme, catalytic polypeptide-like 3G	0.1721	0	0.0598	0	1.4221	0	0.3858	0	0.0724	0.0129	0.3841	0	0.0227	0	0.0696	0	0.0426	0	0.0154	0	0.3205	0.0067	0	0	0.0382	0	0.5973	0	0.0104	0	0	0	0.3875	0	0.6836	0	0.3795	0	0.0746	0	0	0	0	0	0.5084	0	0.3226
10478	SLC25A17	solute carrier family 25 (mitochondrial carrier; peroxisomal membrane protein, 34kDa), member 17	0.0276	0.0299	0.0093	0.0284	0.1309	0.1522	0.1149	0.0498	0.023	0.3785	0.0784	0.9031	0.0198	0.084	0	0	0.018	0	0.0123	0.0077	0.0237	1.0218	0	0.0151	0	0.0378	0	0.5593	0.0088	0.3639	0	0.1016	0	0.0615	0.2558	0.0526	0.0382	0.079	0.0781	0.0731	0.0344	0.0809	0.0129	0.1373	0.2264	0.0567	0.006
5868	RAB5A	RAB5A, member RAS oncogene family	4.4313	5.3026	5.8076	6.7778	3.5642	5.8926	9.0193	7.6303	5.5585	11.7067	4.9365	4.4474	0.661	4.477	4.5299	8.0892	4.3704	3.3301	2.7769	1.6746	3.1666	9.4637	0.9911	5.7907	4.3985	5.167	1.6469	6.5403	1.3741	8.1276	4.6358	5.7868	1.4076	6.2348	4.4937	3.8411	2.8308	7.0432	4.1412	3.2398	2.7915	3.6372	8.7602	8.1092	4.7329	5.7315	2.3442
55902	ACSS2	acyl-CoA synthetase short-chain family member 2	1.362	0.1746	0.5399	0.2363	0.4081	0.2392	0.6454	0.1339	0.5263	0.297	1.4294	0.2123	0.0049	0.2346	0.0666	0.2649	0.0485	0.106	0	0.0047	0.0628	0.86	0.0042	0.5949	0.1485	0.1497	0.0253	0.0975	0.1935	0.1927	0.2801	0.1343	0	0.3564	0.4289	0.2946	0.3134	0.3747	0.4907	0.3045	0.4963	0.0921	0.5567	0.1983	0.2066	0.1345	0.0398
29978	UBQLN2	ubiquilin 2	0.3392	0.159	0.2341	1.7125	0.6207	0.9072	1.4767	0.4646	2.1371	1.0219	0.4484	0.606	0.0741	1.2925	0.3551	0.278	0.2512	0.1486	0.1224	0.1045	0.4375	0.3471	0.0493	0.1989	0.3483	0.1457	0.7884	0.3978	0.8102	0.8006	0.9887	0.691	0.5947	0.9783	0.9611	0.5981	0.8974	0.4149	1.1161	0.3619	0.4163	0.1704	0.6958	0.2673	0.7132	0.4316	0.7556
617	BCS1L	BC1 (ubiquinol-cytochrome c reductase) synthesis-like	2.3997	2.0957	0.2103	5.1592	3.8453	6.3518	2.0482	2.9177	4.3773	2.5561	3.4802	5.4724	0.1386	3.2191	6.4543	5.5345	18.491	3.5787	0.4157	0.4948	3.8456	6.9677	0.7998	4.6999	2.8219	2.9199	0.2658	1.3558	0.3821	0.7919	0.4297	1.7388	0.3922	2.0816	3.5014	2.4122	0.2856	1.6944	0.2509	1.4045	1.8075	0.5606	4.1949	2.2182	1.4836	1.768	0.2355
220869	CBWD5	COBW domain containing 5	0.0031	0.0135	0	0.0153	0.0029	0.045	0.0174	0.0035	0.015	0.0088	0.0461	0.0196	0	0.5007	0.005	0.009	0.0018	0	0	0	0.0024	0.0283	0	0.0171	0.0011	0.0101	0.0048	0.0092	0.0103	0.0278	0.0024	0.013	0.004	0.0061	0.0031	0.0028	0.0021	0.0023	0.0237	0.0031	0	0	0.0231	0.0138	0	0	0.0094
84343	HPS3	Hermansky-Pudlak syndrome 3	0.0662	0.0119	0.0349	0	0.013	0.0223	0.4283	0.0038	0.0081	0.011	0.203	0.0219	0	0.009	0.0027	0	0.0146	0.0043	0	0	0	0	0	0	0.001	0	0.0072	0.0014	0	0	0.0338	0	0.0072	0	0.0231	0	0	0.0133	0	0	0.0103	0.0192	0.0017	0.0012	0.0061	0	0.0032
5660	PSAP	prosaposin	40.6608	8.0966	26.9925	50.2758	36.1959	33.2034	18.5986	6.6913	19.191	15.247	83.5227	54.6932	1.0079	10.1581	17.6354	40.879	46.4771	25.018	27.7481	12.6241	14.7487	59.5523	11.5691	41.3677	24.9977	20.3661	3.3682	9.8591	3.9112	11.7884	7.4145	15.8328	5.6547	9.7518	11.9883	14.5255	7.2365	8.6997	4.9891	6.7781	29.9366	14.2156	36.4893	22.2341	32.4641	11.0362	3.7926
54784	ALKBH4	alkB, alkylation repair homolog 4 (E. coli)	0.2005	0	0	0.1567	0.0218	0	0.0144	0.0577	0.0192	0	1.3123	0	0	0	0	0.0303	0	0.0117	0.0131	0	0.0105	0	0	0	0.0255	0.0072	0	0	0.0127	0.835	0.0288	0	0.0081	0.5452	0.5339	0.3236	0.3014	0	0.0203	0.0117	0.0193	0.0679	0.7301	0.0152	0	0	0.0262
10240	MRPS31	mitochondrial ribosomal protein S31	0.062	0.334	0.0544	0.5558	1.4177	1.0081	0.0915	0.5939	0.2974	0.7514	0.4121	1.2095	0.0157	1.1984	0.0532	0.5408	0.0703	0.1684	0.0126	0.1222	0.1013	0.8939	0.0226	0.5778	0.054	0.7999	0.3766	1.0731	0.4231	2.0617	0.3426	0.8352	0.276	0.8419	0.1313	1.4907	0.6541	1.5558	0.4502	1.368	0.1126	0.2882	0.1882	0.3879	0.2995	0.6528	0.05
51608	GET4	golgi to ER traffic protein 4 homolog (S. cerevisiae)	0.9767	0.1771	0.2609	5.4981	0.4289	0.8289	0.4839	0.4126	0.2774	4.3735	0.1731	8.612	0.2004	6.2424	0.9175	7.1337	0.2915	0.2579	0.1217	0.0805	0.4836	0.2656	0.0102	5.9646	0.3855	0.2175	0.1865	2.5254	0.4357	1.7769	2.1801	4.5804	0.4872	1.1047	0.7155	0.229	0.2969	0.5521	0.4897	0.6616	2.6951	0.7533	0.8119	6.0088	0.5454	1.7148	0.4349
5306	PITPNA	phosphatidylinositol transfer protein, alpha	4.2872	0.4349	1.2052	1.5899	1.6598	1.3106	1.8684	0.633	2.8157	1.7375	4.4766	0.6339	0.0931	0.5822	1.1648	0.7612	1.5256	0.8408	0.8447	0.5611	2.0324	1.9984	0.3922	1.667	1.3412	0.6499	0.7156	0.9146	0.6245	1.2752	1.5218	1.2357	0.3495	0.7718	0.7265	0.8893	0.5396	0.5978	0.7413	0.6897	2.3207	0.4231	1.2982	0.7333	1.6299	1.6315	0.474
55890	GPRC5C	G protein-coupled receptor, family C, group 5, member C	0	0.1137	0.0395	0.0901	0	0.0131	0	0	0	0	0	0.1371	0	0.0172	0.0288	0.6293	0.0344	0.1774	0	0	0	0.0524	0	0.3558	0.0073	0.1903	0	0.061	0	0.109	0	0.2027	0	1.1489	0	0.9349	0	0.6832	0	0.6208	0	0.1635	0.0682	0.1286	0.0295	0.0153	0
8078	USP5	ubiquitin specific peptidase 5 (isopeptidase T)	3.0184	1.2993	1.0505	1.349	4.1506	3.109	2.1117	1.6201	3.6158	2.3454	1.8277	1.5068	0.4196	1.455	1.6406	1.4287	0.7491	0.8312	2.6155	0.9868	3.9675	3.7275	0.7915	2.0467	2.6575	1.3267	1.9467	1.5314	2.8887	2.61	3.459	2.859	1.573	3.1282	3.5666	2.3752	3.4452	2.0076	3.3283	2.1506	2.2478	1.7683	2.9531	0.7852	1.6842	1.9582	1.1369
727	C5	complement component 5	0.321	0.6891	1.6422	3.2399	0.8108	2.7625	0.4088	0.7637	0.4037	0.4303	0.4982	0.8298	0.2219	0.695	0.923	0.8696	1.339	0.6087	0.6138	0.475	0.779	1.7619	0.0833	2.7691	0.6036	0.927	0.8488	1.1959	0.5656	1.7157	0.4725	1.9625	0.5508	1.6234	1.2997	1.258	0.8381	2.1083	0.589	1.8266	1.0846	0.7834	1.0659	0.5896	0.5713	0.5345	0.3831
1819	DRG2	developmentally regulated GTP binding protein 2	4.4645	0.242	0.1904	0.2163	0.4259	0.546	0.2505	0.4261	0.265	0.4935	0.1185	0.3699	0.034	0.4357	0.1883	0.4055	0.1056	0.0517	0.3185	0.136	0.4588	0.5693	0.0234	0.3714	0.3672	0.359	0.1671	0.5787	0.1703	0.4686	0.3322	0.6659	0.2635	1.3695	0.2992	1.0685	0.4844	0.4784	0.5922	0.3809	0.4434	0.4515	0.1738	0.2337	0.1084	0.3508	0.1357
5564	PRKAB1	protein kinase, AMP-activated, beta 1 non-catalytic subunit	3.5627	1.0053	0.9204	0.6735	2.4014	2.0326	0.2663	1.1224	1.4376	1.2696	0.1585	0.9895	0.4133	1.0042	0.7358	0.9715	0.3751	0.1858	0.3399	0.1751	1.5611	1.5341	0.2093	1.0443	0.5618	0.8551	0.4312	0.8106	0.6032	2.4841	1.1955	2.3462	1.3339	2.4096	1.6729	1.603	2.2824	2.2481	2.435	1.299	1.1598	0.3098	1.6342	0.9017	1.7465	1.1113	0.4846
11041	B3GNT1	UDP-GlcNAc:betaGal beta-1,3-N-acetylglucosaminyltransferase 1	0.0894	0	0	0.013	0	0.0057	0.0398	0.028	0	0.0394	0.0967	0.4477	0	0.3134	0.0435	0.0508	0	0	0	0	0.2542	0.3255	0	0	0.0348	0.2403	0	0.0055	0.0085	0.2305	0.0604	0	0.1399	0	0.3393	0.236	0	0.5725	0.0245	0.1685	0.0846	0.176	0	0.1436	0.0236	0.4268	0.7882
7276	TTR	transthyretin	15.3503	113.22	101.336	189.249	79.5145	359.897	129.329	235.664	42.4536	70.6922	6.4635	45.0258	31.9696	116.094	30.5952	84.4351	81.4493	37.7462	54.7011	25.2603	64.803	139.435	28.836	47.0592	56.4757	52.1941	129.514	130.314	79.9709	189.694	117.537	306.577	49.9891	119.886	135.125	167.563	83.9535	156.104	94.3553	213.933	243.427	90.4449	104.296	308.772	70.8496	141.111	111.632
8437	RASAL1	RAS protein activator like 1 (GAP1 like)	0.2338	0.0705	0.1824	0.0363	0.2467	0.0355	1.2858	0.3656	0.04	0.1148	0.12	0.0552	0.0334	0.1118	0.0073	0.2839	0.4271	0.1823	0.8223	0.1529	0.0735	0.5792	0.1217	0.2952	0.2529	0.0342	0.1268	0.1295	0.4426	0.7785	0.9968	0.0338	0.1141	0.3972	0.114	0.0478	0.0113	0.0826	0.3947	0.3223	0	0.0232	0.475	0.0118	0	0.2212	0.0758
9039	UBA3	ubiquitin-like modifier activating enzyme 3	9.0703	0.3221	0.083	0.9147	0.4766	0.7553	0.8944	0.3382	0.6376	0.3646	0.2375	0.5059	0.0125	1.4483	0.5986	0.4347	0.1265	0.207	0.1235	0.2145	1.5239	2.1085	0.2446	2.414	1.0923	0.5294	0.3206	0.5818	0.2772	0.9735	0.8193	0.8725	0.2621	0.5422	0.8809	0.3349	0.394	0.3459	0.7696	0.3592	0.9762	0.2667	1.0572	0.461	0.8846	1.3531	0.3466
84928	TMEM209	transmembrane protein 209	0.0111	0	0.0066	0	0.0105	0	0	0.0095	0	0	0	0	0	0.0169	0	0	0	0	0	0	0.0042	0	0	0	0.0113	0	0	0.0094	0.0691	0	0	0	0.0033	0	0.0339	0.0369	0	0.0106	0	0	0	0	0	0	0	0.0306	0.0051
389524	GTF2IRD2B	GTF2I repeat domain containing 2B	0.0453	0	0.0131	0	0.0555	0	0.0373	0	0	0	0	0	0	0	0	0	0.0502	0	0	0	0	0.072	0	0	0.1541	0	0	0	0	0	0	0	0	0	0.0263	0	0	0	0	0	0.4958	0	0	0.0286	0	0	0
4713	NDUFB7	NADH dehydrogenase (ubiquinone) 1 beta subcomplex, 7, 18kDa	0.6701	2.9091	0.6627	4.6353	0.6085	5.2072	0.2306	11.6248	0.2041	5.1158	1.2455	6.6199	0.0415	5.6959	0.1893	6.5178	0.2087	3.1435	0.2914	1.0541	0.552	6.5445	0.2309	2.8055	1.0681	2.9548	0.2049	3.0792	0.1498	9.0251	0.0842	3.9305	0.1503	4.9692	0	4.2545	0.3706	5.7892	0.3069	6.327	0.6039	6.292	0	5.047	0.5527	9.3996	0.2275
85415	RHPN2	rhophilin, Rho GTPase binding protein 2	0.0133	0.1261	0.0412	0.0747	0.1699	0.0883	0.068	0.0818	0.2607	0.08	0.1257	0.2524	0.0177	0.0228	0.4166	0.2908	0.0171	0.0025	0.0139	0	0.0635	0.4691	0.0126	0.0139	0.0621	0.0144	0.0643	0.0308	0.0861	0.0951	0.1023	0.0576	0.0514	0.0104	0.1669	0.028	0.0406	0.1574	0.2676	0.1404	0	0.0207	0.1551	0.0141	0.0399	0.1282	0.0759
29094	LGALSL	lectin, galactoside-binding-like	0	0.557	0.3211	1.0383	0.4676	0.3021	0.1724	0.928	0.497	0.6524	1.0327	2.9351	0	0.8364	0.8919	2.3877	0.35	0.3788	0.1001	0.098	2.2565	1.0252	0.038	2.1836	0.2656	0.3607	0.2062	0.5307	0.1995	1.0531	0.4389	0.4576	0.0815	0.6678	0.4572	1.1866	0.4579	0.8668	0.4062	0.5177	0.0427	0.1081	0.2299	0.8449	0.6257	1.2207	0.1483
7174	TPP2	tripeptidyl peptidase II	1.7685	0.2143	0.7475	0.2753	1.1033	0.8113	0.9269	0.1425	1.5604	0.6149	0.8788	0.2995	0.1852	0.4146	1.1722	0.6744	0.9305	0.2545	0.6489	0.11	0.851	0.5928	0.1996	0.3635	1.1659	0.2184	0.5803	0.168	0.6621	0.6243	0.9801	0.3578	2.1639	0.7917	0.8563	0.4009	1.1577	0.5355	1.1312	0.7153	1.1036	0.1908	1.7541	0.167	0.4758	0.2166	0.4907
285966	FAM115C	family with sequence similarity 115, member C	0.1188	0	0.0409	0	0.034	0	0.1249	0	0.2484	0	0.1997	0	0.006	0	0.0069	0	0.0486	0	0.0346	0	0.05	0	0	0	0.0109	0	0	0	0.0396	0	0.0169	0	0.0279	0	0.054	0	0.0163	0	0.0658	0	0	0	0.0565	0	0.0368	0	0.0247
34	ACADM	acyl-CoA dehydrogenase, C-4 to C-12 straight chain	2.7835	51.2876	2.5261	157.939	8.724	132.336	23.3786	70.6252	5.9062	70.8781	9.9851	96.1998	0.3462	107.51	9.1916	190.771	12.8748	13.7315	3.2161	7.3585	7.1284	81.2747	2.7929	133.625	4.55	58.941	3.2116	83.1052	5.0339	128.227	3.1564	149.548	1.7057	64.7526	20.1819	75.856	2.9602	53.7531	5.5921	15.7603	10.1519	72.0618	15.5107	130.853	7.1356	89.0935	1.7098
150223	YDJC	YdjC homolog (bacterial)	0.0465	0	0.0464	0	0	0.0306	0	0	0.1662	0	0.2962	0	0	0	0	0	0.1499	0	0.0132	0	31.9683	0	0	0	0	0	0	0	0	0.0468	0	0.0252	0	0	0	0	0	0	0	0	0.0879	0.0103	0.0511	0	0	0.2416	0
26056	RAB11FIP5	RAB11 family interacting protein 5 (class I)	0.8413	1.7227	0.4488	0.6056	0.72	1.0272	0.427	0.5036	3.3081	0.7219	0.0731	0.6787	0.1522	0.8911	0.2776	1.0083	0.3966	0.8442	0.298	0.0357	0.6945	1.2051	0.1057	0.3667	0.3557	0.6498	0.2423	0.5944	0.5114	1.2097	0.4894	0.5124	0.6581	1.6027	0.3472	1.7086	0.3374	0.8627	0.8457	0.5352	0.3332	0.6309	0.4565	0.444	0.9492	0.6524	0.6778
58508	KMT2C	lysine (K)-specific methyltransferase 2C	0.0046	0	0	0	0	0.1505	0	0.0005	0.0023	0	0	0	0	0	0	0	0	0	0	0	0	0	0	0	0	0	0.0081	0	0.0005	0.0037	0	0	0	0.009	0	0	0	0	0	0	0	0	0.0021	0	0	0	0
55739	CARKD	carbohydrate kinase domain containing	0.148	1.1475	0.4033	2.069	0.5004	2.4079	0.3325	1.5924	1.1708	1.8216	1.3531	1.9129	0.2587	1.6048	1.1909	2.5184	0.7534	0.6983	0.4258	0.5363	0.8758	3.483	0.4512	2.2563	0.9815	1.6639	0.4989	1.0548	0.5328	2.0554	1.0887	1.8668	0.2906	2.2122	1.6376	1.446	0.6769	0.8521	0.4604	0.9882	0.8547	0.3874	2.0055	1.6127	0.3593	1.3069	0.5517
5876	RABGGTB	Rab geranylgeranyltransferase, beta subunit	0.2991	0	0.3813	0.2248	0.3115	0.3593	0.2021	0.0746	0.7703	0.0907	0.1212	0.1126	0.0152	0.0892	0.0598	0.0803	0.0129	0.0398	0	0.0938	0.1592	0.1022	0	0.2005	0.0767	0	0.0063	0.01	0.0164	0.1219	0.0535	0.2187	0.0095	0.0975	0.237	0.125	0.1103	0.0432	0.1583	0.0188	0.3703	0.2114	0.0643	0.2299	0.0913	0	0.0339
7168	TPM1	tropomyosin 1 (alpha)	228.702	68.8924	101.747	184.312	124.018	96.4656	180.018	220.834	207.8	361.715	280.198	168.428	21.4455	191.994	150.495	127.743	135.499	47.3723	133.687	95.8846	168.095	127.371	78.2874	111.4	173.513	84.0488	152.762	213.706	79.8607	132.725	166.175	180.366	63.2366	217.719	83.0273	94.0196	45.0786	280.93	88.8956	62.9054	125.042	34.884	146.826	134.008	36.0439	95.2599	30.9547
51606	ATP6V1H	ATPase, H+ transporting, lysosomal 50/57kDa, V1 subunit H	0.6035	5.8219	0.967	9.3882	1.0138	10.7175	2.2807	1.9424	1.3272	8.7378	1.6369	8.0528	0.1476	6.9691	0.538	5.6311	0.7659	0.3916	0.4772	0.4415	1.5024	9.2384	0.1996	7.9716	0.7386	5.8749	0.4625	10.2886	0.393	7.5114	0.6861	10.3416	0.5783	3.9251	0.8519	7.4969	0.8236	4.2376	0.4765	3.709	0.8742	4.466	1.4308	7.3166	0.678	1.1824	0.5869
7461	CLIP2	CAP-GLY domain containing linker protein 2	0.1182	0.0194	0.3946	0.0174	0.0366	0.015	0.0743	0.0938	0.1453	0.0773	0.7219	0.0302	0	0.0065	0.0399	0.0174	0.3535	0.4087	0.3355	0.0355	0.9061	0.0205	0.0463	0	0.0725	0.0026	0.0018	0.0076	0.0782	0.0046	0.0363	0.0069	0.0173	0.0118	0.0051	0.004	0.0385	0.0121	0.018	0.0373	0.0828	0.0055	0.3691	0	0.2239	0.1476	0.0932
56997	ADCK3	aarF domain containing kinase 3	0.529	1.5633	0.005	0.5224	1.0512	3.0724	0.6299	1.3805	0.7544	1.128	0.9537	2.8944	0.0642	2.59	0.3065	2.0536	0.1696	0.5599	0.0239	0.1292	0.3516	3.0447	0.1387	2.1542	0.238	0.7834	0.1851	1.1738	0.1964	4.3565	0.3977	2.9673	0.5008	2.1631	0.4719	5.3073	0.3074	2.2209	0.4619	3.7239	1.0184	0.0474	0.6558	3.1129	0.1222	1.473	0.2442
4952	OCRL	oculocerebrorenal syndrome of Lowe	0.3978	0.0565	0.0549	0.0816	0.111	0.0209	0.0302	0.0113	0.3388	0.2751	0.0584	0.0233	0.0017	0.0142	0.0504	0.1178	0.0075	0.1736	0.0799	0.1112	0.0375	0.0654	0.1124	0.1102	0.0756	0.0214	0.0062	0.0064	0.008	0.0133	0.0089	0.0123	0.0042	0.0122	0.0537	0.0084	0.0137	0.136	0.0098	0.0061	0.0293	0.3243	0.0205	0.1448	0.013	0.1448	0.1911
3329	HSPD1	heat shock 60kDa protein 1 (chaperonin)	56.1422	215.786	98.4911	375.199	433.128	636.896	108.334	269.156	504.679	393.738	363.121	365.118	7.8157	493.814	42.648	412.973	40.6803	48.6037	15.2705	24.091	33.7679	430.02	18.7181	375.768	30.0278	268.455	21.8902	389.247	52.3372	700.883	42.5649	594.402	29.9826	442.3	157.277	466.353	23.4063	580.925	40.4621	249.224	710.663	227.946	217.859	385.56	134.341	179.865	10.5872
55860	ACTR10	actin-related protein 10 homolog (S. cerevisiae)	0.5669	0.1056	0.1507	0.2543	0.5563	0.5128	0.7482	0.1348	0.8097	0.7144	0.2769	0.5663	0.1414	0.3898	0.7033	0.1585	0.1793	0.3457	0.422	0.1937	0.6296	0.4411	0.1187	0.3502	0.3704	0.2632	0.3845	0.0942	0.337	0.2654	0.3231	0.3806	0.4954	0.4348	0.8114	0.7658	0.7066	0.5051	0.5977	0.7554	0.4517	0.0592	0.913	0.3292	0.1587	0.2439	0.0948
51382	ATP6V1D	ATPase, H+ transporting, lysosomal 34kDa, V1 subunit D	0.5873	15.268	1.0628	21.5956	1.1277	20.4677	2.4716	7.7605	0.5118	20.8983	4.769	18.7231	0.0977	16.1024	0.8754	9.3667	0.643	0.4225	0.772	0.7258	1.0155	14.2577	0.1969	12.6394	0.8154	11.561	0.5564	5.274	0.4791	16.9379	0.4426	8.9259	0.2772	5.2867	0.5815	15.1338	0.6461	11.9735	0.679	6.4925	0.9323	1.1201	0.7789	21.314	0.0378	6.0787	1.4012
90332	EXOC3L2	exocyst complex component 3-like 2	0.513	0.2614	1.6394	1.4573	1.3969	0.1067	0.3472	0.3682	0.0836	0.3104	0.1525	0.2772	0.0674	0.2031	0.8634	0.5245	0.5753	0.0655	1.5494	0.7717	4.6527	3.7557	0.5325	0.2149	3.6041	2.7576	7.0674	0.0953	2.9863	3.4051	1.4017	0.2167	0.1765	0.1345	0.8305	0.1158	1.8132	1.365	0.2552	0.1185	0.1392	0.1847	0.0943	0.0892	0.2079	0.416	0.4089
80201	HKDC1	hexokinase domain containing 1	4.9325	0.7342	4.8252	1.7673	10.1086	1.5228	2.9077	0.3238	5.5338	2.4152	5.6432	1.556	0.2977	2.2593	0.8766	1.1451	1.7839	0.0258	0.7315	0.0411	2.2031	3.364	0.117	1.9324	0.1662	1.6425	1.7086	1.0202	0.7648	1.1263	0.3345	0.7263	0.2782	1.0071	0.5823	0.4307	0.2889	1.5279	0.8898	0.5681	4.7722	0.7301	0.2371	0.7684	0	0.1496	0.3985
2944	GSTM1	glutathione S-transferase mu 1	0.829	0.8793	0.1134	0.1157	0.2116	0.1359	0.3267	1.1151	0.8206	0.8804	0.3023	0.3603	0.0531	0.7616	0.2094	0.1303	1.2552	0.6363	1.5143	1.1235	0.1698	0.2977	0.0493	0.3614	1.4563	0.7026	0.8036	0.672	0.0804	0.2263	0.1551	0.1312	0.9062	1.0979	0	0.1108	0.2065	0.1429	0.1711	0.1982	0.0626	0.1836	1.6018	0.7759	0.2125	0.6093	0.6446
9342	SNAP29	synaptosomal-associated protein, 29kDa	1.0689	0.1303	0.33	0.618	0.4805	0.4078	0.2891	0.0862	0.2173	0.1623	0.4714	0.3098	0	0.4892	0.2845	0.2186	0.2288	0.0895	0.4894	0.1757	0.233	0.2445	0.0567	0.1725	0.1817	0.1317	0.2234	0.8104	0.308	3.9577	0.327	1.288	0.2414	2.6274	0.3273	5.0985	0.1147	12.1813	0.2853	0.8757	0.3672	0.1468	0.3583	0.1745	0.4592	0.2047	0.299
3009	HIST1H1B	histone cluster 1, H1b	87.9368	0.2407	37.614	1.6352	3.3572	1.3048	6.5756	0.0502	71.7089	44.8851	72.093	1.0943	0.1688	2.4009	35.9752	5.7944	24.665	0.6361	13.0385	0.1024	27.8761	0.2661	12.0246	2.3237	24.4566	0.7664	3.4608	0.5088	0.7991	0.0775	3.1339	0.6154	1.6223	1.0477	2.3168	0.2631	0.6115	0.2327	1.9489	0.543	2.6709	0.0969	0.0401	0.5984	1.3891	37.3235	2.2448
84643	KIF2B	kinesin family member 2B	0	0	0	0	0	0	0	0	0	0	0	0	0	0	0	0	0	0	0	0	0	0	0	0	0	0	0	0	0	0	0	0	0	0	0	0	0	0	0	0	0	0	0	0	0	0	0
101060291	LOC101060291	myomegalin-like	0.0139	0.0278	0.0059	0.0104	0.0794	0.0271	0.0211	0.143	0.0237	0.0215	0.0325	0.0265	0.0014	0.0105	0.0117	0.0839	0.0571	0.0047	0.0033	0.0305	0.0061	0.0141	0.0024	0.0096	0.0022	0.0235	0.0067	0.0164	0.0152	0.0329	0.0497	0.0206	0.0093	0.0378	0.0111	0.0537	0.0055	0.0277	0.0278	0.0608	0.0495	0.0074	0.0054	0.0169	0.0437	0.0318	0.009
1315	COPB1	coatomer protein complex, subunit beta 1	3.3056	2.4995	3.2166	5.5706	12.8014	4.6536	5.0072	5.9054	7.7405	9.5878	2.5085	9.8481	0.9229	20.0525	1.8138	9.0761	9.4374	1.309	1.1168	4.7648	14.0467	9.0269	0.7077	11.6235	2.8833	2.2968	19.0967	6.419	7.4868	13.664	19.0476	5.5993	7.1882	4.1276	12.2318	3.8355	17.5593	2.5101	19.5887	4.1557	9.8287	1.8452	6.5765	4.9933	6.3371	12.7416	5.9545
6117	RPA1	replication protein A1, 70kDa	2.0801	0.2835	0.9555	0.8696	0.9689	0.4996	1.7223	1.2351	1.8456	2.2477	1.3617	1.7711	0.2615	2.8103	1.0035	0.5902	0.7936	0.3606	2.7175	0.7047	1.3134	1.2652	0.5451	1.2029	1.8749	0.8965	1.1115	0.6622	1.2424	0.5945	2.204	0.581	0.7591	0.8326	2.3492	0.3522	0.9216	0.9071	1.3783	0.5577	4.7498	0.1679	2.6736	0.4182	0.8406	1.5513	0.8312
27314	RAB30	RAB30, member RAS oncogene family	0.0268	0	0	0	0	0	0	0	0	0	0	0	0	0	0	0	0	0	0	0	0	0	0	0	0	0	0	0	0	0	0	0	0	0	0	0	0	0	0	0	0	0	0	0	0	0	0
231	AKR1B1	aldo-keto reductase family 1, member B1 (aldose reductase)	48.0066	2.4533	8.171	3.2377	10.3395	4.2416	36.5101	22.0401	14.7492	2.158	66.3917	12.7761	5.4051	4.0019	4.5746	5.5421	22.4748	48.4444	11.8629	70.6377	9.8274	11.7085	10.6108	3.2747	5.4961	2.0078	5.8301	3.1075	2.6017	3.2734	19.32	4.3216	2.692	5.3529	1.5798	2.8734	4.133	3.9007	4.2874	112.29	83.6982	1.2138	11.5105	2.1742	2.9427	42.8689	11.8358
9368	SLC9A3R1	solute carrier family 9, subfamily A (NHE3, cation proton antiporter 3), member 3 regulator 1	7.9453	9.5867	5.1681	55.1486	3.9228	75.7931	12.4071	22.4378	4.2873	49.8722	3.2344	54.1642	1.3011	73.9299	3.6979	59.5686	5.427	1.0847	4.8558	0.4216	2.5207	24.9493	1.0779	30.6987	1.3056	26.5617	3.8561	47.0535	3.3063	87.7164	2.5969	46.513	2.4212	48.1885	2.4833	44.927	1.979	70.4971	3.1654	18.8018	7.4801	30.4224	7.6152	36.8185	2.4009	4.9132	0.9689
23568	ARL2BP	ADP-ribosylation factor-like 2 binding protein	0.9933	0.0562	0.1511	0.0737	0.8441	0.0205	2.1416	0.0471	0.5152	0	1.1112	0.1633	0.0339	1.3466	0.6931	2.3616	0.9458	0.0308	0.1182	0.0568	1.0816	0.7439	0.1089	0.0862	0.1853	0.0574	0.1863	0	0.3418	0.1402	0.2615	0	0.0189	0.0417	0.1792	0	0.4344	0.079	0.0356	0.0453	2.4891	0.9347	1.4302	0	0.4743	0.0314	0.0554
25801	GCA	grancalcin, EF-hand calcium binding protein	1.9296	1.0809	1.4115	1.1245	4.1396	3.8525	4.0614	3.1499	3.1886	3.4809	2.2481	2.8732	0.0855	0.4821	1.283	2.0904	2.0967	0.9698	1.2603	0.4259	2.1319	1.0166	0.5254	0.9862	1.3275	0.6942	3.5383	2.8874	1.8773	7.2042	1.9884	2.8867	1.206	3.2952	3.7371	1.8565	2.4514	1.3909	3.2629	1.3149	1.3903	0.6053	2.6512	0.8389	2.5247	1.2181	0.8069
8310	ACOX3	acyl-CoA oxidase 3, pristanoyl	0.8943	0.4168	0.0453	0.3671	0.1432	0.6624	0.0783	0.2484	0.0531	0.389	0.091	0.2475	0.0633	0.5151	0	0.3958	0.0623	0.0139	0.0884	0.0255	0.2766	2.8302	0.0425	0.2423	0.0771	1.5231	0.0667	0.2085	0.0267	0.4369	0.0218	0.2594	0.0265	0.084	0.1041	0.4517	0.0791	0.347	0.0974	0.5226	0.949	0.3827	0.0962	0.1589	0.3047	0.2731	0.1454
4358	MPV17	MpV17 mitochondrial inner membrane protein	0.0694	0.2978	1.0613	2.2741	1.356	0.7069	0.7836	0.5581	0.7297	0.5699	0.7697	1.0268	0	0.7466	0.0143	0.4969	0	0	0.2364	0.0711	1.7422	4.2279	0.315	2.5781	0.5929	2.5782	0	0.3033	0.1705	0.5841	0.3489	0.5672	0.2302	0.4729	1.0527	0.1016	0.1316	0.8739	0.7057	0.4198	0.8087	0.495	0.6126	0.542	0.6424	0.345	0
83658	DYNLRB1	dynein, light chain, roadblock-type 1	2.3068	1.6913	2.5771	3.9592	2.3624	8.3596	3.061	3.1017	3.8	4.8403	0.5942	4.5278	0.7532	3.9352	4.4423	4.6263	3.3411	2.2225	1.4932	1.0761	3.1581	2.7949	1.3255	1.8166	2.0951	2.707	3.2845	3.1892	1.8926	1.8119	3.1131	1.1409	2.1048	3.2577	3.1607	2.8816	2.0867	4.0426	3.8037	3.6459	2.9152	0.7631	5.4505	1.9264	0.5957	2.9477	1.7976
3384	ICAM2	intercellular adhesion molecule 2	0.2083	0.0661	0.0811	0.0402	0.0533	13.5221	0.0405	0.1001	0.055	0.0765	0.0345	0.0506	0.0239	0.1711	0.1849	0.0785	0	0.1207	0.155	0.0473	0.2777	0.0474	0.086	0.0314	0.0415	0.04	0.1099	0.0353	0.1598	0	0.069	0.0313	0.1192	0.0586	0.2158	0	0.1445	0.0458	0.1374	2.5258	0.0366	0	0.0504	0.0349	0.0233	0.2145	0.1356
1977	EIF4E	eukaryotic translation initiation factor 4E	1.1729	0	0.0602	2.0634	0.1683	1.9239	0.6594	0.5265	0.0719	5.2552	0.6943	3.5328	0.1234	0.1843	0.0984	1.1121	0.0859	4.5498	4.4496	11.1144	4.2423	4.4433	3.4137	3.0411	2.6691	2.1376	0.0338	0.7529	0.1195	0.324	0.1843	0.19	0.0567	1.4652	1.228	0.7969	1.5348	0.521	0.1663	0.1003	25.3169	0.0874	0.9555	0.063	0.2996	1.7481	0.1641
7454	WAS	Wiskott-Aldrich syndrome	0.1058	0	0.2206	0	0.0461	0	0.4559	0	0.376	0.1674	0.0139	0	0.0495	0.1624	0.0833	0	0.0186	0	0	0	0.1833	0	0.0708	0	0.1669	0	0.0102	0	0.0066	0	0.0327	0	0.0567	0	0.0551	0	0.0425	0	0.0622	0	0.2775	0	0.0694	0	0.3534	0.1697	0.1845
9646	CTR9	CTR9, Paf1/RNA polymerase II complex component	0.0281	0.0196	0.0204	0.0288	0.0785	0.0351	0.4729	0.0557	0.0447	0.0552	0.0524	0.0376	0.0038	0.0693	0.4997	0.1215	0.3924	0.1155	0.0496	0.0967	0.3758	0.2811	0.1683	0.0134	0.0335	0.1234	0.0299	0.0256	0.2132	0.1963	0.3228	0.2216	0.0184	0.0379	0.2948	0.0254	0.1221	0.017	0.0432	0.0149	0.0975	0.0229	0.0596	0.0702	0.08	0.0573	0.0278
150472	CBWD2	COBW domain containing 2	0.0026	0.0113	0.9057	0.9066	0.0024	0.0144	0.0118	0.003	1.8578	2.1474	1.7984	1.2371	0	0.4216	0.0042	1.1949	0.0015	0	0	0	0.4595	0.0238	0.295	1.0596	1.0988	0.6679	0.004	0.9541	0.5628	1.2629	0.9715	0.9464	0.0034	0.0052	0.0026	0.0024	0.0018	0.0019	0.0038	0.6634	1.0439	0	0.8745	0.0044	0	0	0.5124
286410	ATP11C	ATPase, class VI, type 11C	0.0605	0.0614	0.1217	0.2287	0.1343	0.0734	0.0602	0.0425	0.0541	0.1175	0.3477	0.0244	0.0088	0.0865	0.1173	0.1192	0.0366	0.0138	0.0462	0.0668	0.1695	0.0888	0.0066	0.0671	0.0631	0.0564	0.0437	0.0166	0.0041	0.6609	0.0071	0.321	0.0088	0	0.0672	0.0124	0.0234	0.057	0.0151	0.0223	0.0456	0.0792	0.0544	0.0283	0.063	0.0488	0.0294
2982	GUCY1A3	guanylate cyclase 1, soluble, alpha 3	3.8521	0	0.3354	0.0069	0.6938	0.0086	0.4293	0.1132	1.643	0.1278	0.7678	0.167	0.016	0.0064	0.5029	0.0833	0.2766	0.015	0.7683	0	0.6119	0.0109	0.2371	0.0035	0.5863	0.0035	0.1764	0.0149	0.0833	0	0.4479	0.0348	0.121	0.1438	0.3376	0	0.6662	0.0332	0.3081	0.0102	0.0724	0.0077	0.5477	0	0.3641	0.0138	0.2709
8677	STX10	syntaxin 10	0.0352	0	0.0426	0	0.1202	0	0.0128	0	0.0632	0.0909	0	0	0	0	0.1306	0.279	0.0461	0	0	0	0	0	0	0.0224	0.1993	0	0	0	0.0233	0.3232	0.2206	0	0.1653	0.1091	0.0591	0.0584	0.1148	0	0.3037	0	0	0.0134	0.1226	0	0.0662	0	0.0188
8289	ARID1A	AT rich interactive domain 1A (SWI-like)	0.0808	0.0159	0.0136	0	0.1173	0.0069	0.0973	0.0803	0.0204	0.039	0.0111	0.0217	0	0.005	0.0931	0.0305	0	0.0176	0.0219	0	0.0051	0.0427	0.0142	0.0302	0.019	0.0131	0.1494	0.0119	0.0606	0.0123	0.1115	0.0016	0.0075	0.0648	0.0531	0.0018	0.0066	0.0274	0.0095	0.0498	0.0036	0.0054	0.099	0.0009	0.0124	0.1686	0.1274
101060318	LOC101060318	eukaryotic translation initiation factor 1A, X-chromosomal-like	3.3977	0.1486	0.1403	0.8274	0.4427	0.4235	0.4158	0.1342	0.8694	0.3862	0.3227	0.5511	0.0679	0.2087	1.0336	1.1417	0.7366	0.3223	1.4197	0.5486	1.8366	0.7834	1.3557	0.5674	1.1924	0.9917	1.9685	0.5076	1.2266	0.465	0.8029	0.3979	1.1747	0.3102	0.7501	0.615	0.4867	0.3646	0.9428	0.2231	0.231	0.0084	0.7366	0	0	0.2334	0
163	AP2B1	adaptor-related protein complex 2, beta 1 subunit	5.2142	2.188	5.1831	6.3883	7.7158	5.0542	6.0328	5.2613	4.8689	8.687	5.5063	5.4837	0.7342	6.5422	3.5809	4.0196	2.6845	2.0099	2.4409	1.1414	3.5524	6.3117	0.8986	4.3278	2.6796	2.8326	3.1005	6.9417	2.956	6.9566	5.7483	9.0205	2.523	4.4688	3.9136	3.5805	2.7617	8.4092	3.5186	5.0336	4.8153	3.4537	6.0404	4.7472	1.9677	5.1988	1.6964
84085	FBXO30	F-box protein 30	0.0183	0.0324	0	0	0	0	0	0.0061	0	0	0	0	0	0.0329	0	0.0193	0	0	0	0	0	0.0603	0	0	0.0264	0	0	0	0	0	0.0046	0	0.0025	0	0	0	0	0	0	0	0	0	0	0	0	0	0.0033
8717	TRADD	TNFRSF1A-associated via death domain	3.0333	1.2675	0.919	0.411	1.5866	0.1892	3.016	0.9027	2.561	0.6542	3.1074	0.4111	0.5017	0.4439	1.4523	2.3879	2.0536	0.1248	1.4614	0.0631	0.6735	0.785	0.4797	0.2003	0.9956	0.3117	2.364	0	0.3746	0.3585	0.8341	0	0.511	0.164	0.6647	0.2766	1.4958	0.0839	0.4125	0.0773	3.1986	0.1219	2.2266	0.2952	0.8555	0.2611	1.0454
53373	TPCN1	two pore segment channel 1	0.071	0.6093	0.079	0.2198	0.2159	0.4094	0.256	0.4279	0.053	0.3304	0.4086	0.5691	0.0024	0.9127	0.066	0.6669	0.0263	0.0102	0.0264	0	0.078	0.3424	0.0112	0.1352	0.0223	0.1225	0.0556	0.1531	0.0629	0.4843	0.0433	0.2785	0.0833	0.187	0.0934	0.3227	0.0441	0.3676	0.0488	0.1115	0.0783	0.3472	0.0234	0.1994	0.0387	0.0164	0.0107
29995	LMCD1	LIM and cysteine-rich domains 1	0.5677	0.1279	0.0509	2.1504	0.9027	0.4702	0.6786	1.5361	0.3199	3.4111	0.4953	0.3386	0	0.5001	0.5868	1.9721	0.2327	0.3443	0.0647	0.2861	0.3357	0.5348	0.0159	0.3271	0.5623	0.1894	0.1176	0.2992	0.0299	0.4848	0.295	0.3546	0.038	1.5497	0.1223	1.4053	0.229	0.8932	0.3702	0.2334	0.3612	0.3695	0.2667	0.153	0.1103	0.9412	0.0198
1730	DIAPH2	diaphanous-related formin 2	0.2524	0.162	0.1315	0.0261	1.3868	0.0652	0.3278	0.2573	0.4588	0.1021	0.0926	0.0498	0.01	0.135	0.3731	0.0279	0.0675	0.0766	0.1994	0	0.6849	0.0788	0.0736	0.1161	0.3379	0.0035	0.104	0.0118	0.2896	0.1199	0.5516	0.0858	0.0901	0.1644	0.2742	0.2069	0.225	0.3643	0.2906	0.0916	0.2068	0.0574	0.8304	0.0657	0.9256	0.1292	0.2061
79651	RHBDF2	rhomboid 5 homolog 2 (Drosophila)	0.0294	0	0	0	0.0291	0	0.0083	0	0	0	0	0	0	0	0	0	0.0186	0	0	0	0.0115	0	0.001	0	0	0	0.0036	0	0.0748	0	0	0	0.0042	0	0	0	0.0066	0	0	0	0	0	0	0	0	0	0.0071
10970	CKAP4	cytoskeleton-associated protein 4	7.1592	2.4717	8.1296	5.1066	19.5378	4.4115	6.183	4.5002	10.5202	6.1043	14.8604	4.8275	0.7425	2.7334	3.2097	3.7271	2.9199	0.7077	3.8824	0.912	3.9573	2.3479	1.7033	1.9421	3.537	1.696	7.5583	5.8738	5.9417	7.4289	8.881	6.2553	2.6533	5.1688	7.0403	4.5642	4.3956	3.5783	7.404	3.4138	2.0392	1.6959	4.3499	2.9509	2.4218	2.9748	1.8402
54431	DNAJC10	DnaJ (Hsp40) homolog, subfamily C, member 10	0.952	0.016	0.1042	0.0528	0.4258	2.5836	0.2755	0.2589	0.1125	0.0359	0.1052	0.0102	0.0028	0.0378	0.115	0.0814	0.1829	0.1361	0	0.018	0.4474	0.2062	0.1248	0.0352	0.042	0.5865	0.0407	0.5151	0.1427	2.7507	0.0487	0.0086	0.1896	3.834	0.092	4.9367	0.0581	0.0833	0.1447	3.8151	0.1716	0.0117	0.2734	0.0084	0.2768	0.1968	0.0209
3655	ITGA6	integrin, alpha 6	1.8798	0.7333	2.3273	1.3503	0.83	1.6329	0.9487	1.0316	1.2355	1.0964	0.8663	1.6753	0.3997	1.3319	4.1521	1.6857	1.3195	0.306	1.0569	0.3011	2.0431	1.6598	1.1381	1.4252	1.4995	1.0952	1.1126	1.1033	1.6659	2.0357	1.3249	1.6152	1.103	1.5009	1.9133	1.2888	1.4092	1.2589	1.7945	1.5872	1.716	0.2854	2.0641	1.0699	1.3391	1.2191	0.6972
64499	TPSB2	tryptase beta 2 (gene/pseudogene)	2.7241	0.2206	32.0714	0.256	1.4569	0.4099	0.9359	0.7266	1.6101	1.4605	1.5165	0.3849	0.4035	1.7255	5.6286	0.3332	2.137	0.1062	0.8285	0.3524	63.9212	0.9221	17.5602	2.6462	29.1426	1.1218	18.3025	9.9989	1.6012	0.1507	11.3732	4.0033	5.9546	3.2746	17.9988	0.3071	29.1348	2.5008	9.5694	0.3971	3.9032	0.045	1.2098	0.2003	10.6057	2.1913	3.3038
5795	PTPRJ	protein tyrosine phosphatase, receptor type, J	0.0114	0.0254	0.028	0.0171	0.0413	0.0595	0.0092	0.0844	0.0587	0.0498	0.0388	0.0924	0	0.0332	0.054	0.1281	0.0136	0.0186	0.0161	0	0.062	0.0427	0	0.0211	0.0019	0.0127	0.0155	0.0231	0.0102	0.0343	0.0592	0.045	0.0144	0.0364	0.0169	0.0214	0	0.0074	0	0.0265	0.1439	0.2259	0.0107	0.0365	0.0288	0.0596	0.01
2767	GNA11	guanine nucleotide binding protein (G protein), alpha 11 (Gq class)	1.1856	0.4492	1.5244	1.4422	1.06	1.9546	1.2122	0.9038	0.9894	1.9653	0.4608	1.3833	0.2247	1.2293	1.0618	1.2275	0.7227	0.5123	0.8212	0.444	1.3966	2.144	0.2987	2.1283	1.0341	0.777	1.0462	1.1283	0.6447	1.6761	1.1109	1.3326	0.4507	2.3835	1.0713	1.0356	0.7667	2.0966	1.0293	0.9577	1.8986	0.6646	1.6243	1.2911	0.4646	2.1544	0.6309
100996271	LOC100996271	putative uncharacterized protein FLJ46348-like	0	0	0.0557	0	0	0	0	0.0701	0.0342	0.0137	0	0.038	0.0064	0	0.031	0.0108	0	0.0098	0	0	0.7501	0.2249	0	0	0	0	0	0	0	0	0	0	0	0	0	0	0.1034	0	0	0	0	0	0.0343	0.2055	0	0	0
22874	PLEKHA6	pleckstrin homology domain containing, family A member 6	0.0725	0.4847	0.0026	0.3844	0.0254	0.4948	0.122	0.6562	0.0182	0.3461	0	0.2425	0	0.9154	0.0234	1.3722	0.1693	0.1407	0.213	0.1481	0.0975	0.7973	0.0319	0.576	0.1406	0.3908	0.1939	0.5502	0.141	0.6307	0.0815	0.5996	0.1319	0.5183	0.14	0.5919	0.0293	0.524	0.0991	0.3127	0.4493	0.7047	0.0836	0.5198	0.1092	0.254	0.0111
6829	SUPT5H	suppressor of Ty 5 homolog (S. cerevisiae)	0.5028	0.1317	0.2678	0.3906	0.1839	0.3228	0.3314	0.2301	0.2454	0.1327	0.2678	0.171	0.0531	0.3552	0.1864	0.2991	0.3317	0.2254	0.3378	0.0185	0.2091	0.253	0.16	0.1253	0.1198	0.133	0.2275	0.1816	1.082	0.1046	0.816	0.1796	0.096	0.2327	0.3978	0.1482	0.2061	0.1019	0.2951	0.1917	0.1299	0.0369	0.1342	0.364	0.1032	0.1721	0.0492
10598	AHSA1	AHA1, activator of heat shock 90kDa protein ATPase homolog 1 (yeast)	0.7882	1.3875	11.5852	1.305	6.0278	2.0948	2.5342	1.3798	1.1652	2.1222	2.7436	1.5182	0.0685	1.2244	1.2883	3.1277	0.3498	0.7082	11.8604	2.1935	0.3769	1.9657	4.7818	4.0404	0.3846	0.7563	5.8841	2.609	6.276	4.0163	9.6264	3.0179	3.73	3.6959	6.213	2.4436	3.4896	2.6186	4.3115	0.6888	1.2373	1.3845	1.6276	1.2551	2.0712	2.2492	1.2368
54386	TERF2IP	telomeric repeat binding factor 2, interacting protein	0.0996	0	0	0.8965	0.2199	0.049	0.8537	0.1745	0	0.0792	0	0	0	0.1768	0.2341	0.0916	0	0.0138	0	0	0.2113	0.7527	0.0263	0.0755	0.013	0	0.019	0	0.0319	0	0.038	0.0824	0.0158	0.0232	0.092	0.0829	0.0369	0.0903	0.0544	0.058	0	0	0.1891	0.2596	0.1982	0.1282	0.0172
80851	SH3BP5L	SH3-binding domain protein 5-like	0.0172	0	0.0149	0	0.1655	0.013	0.1521	0	0	0	0	0.0079	0	0	0.0125	0.0474	0.0211	0	0.0079	0	0.2045	0	0.0739	0	0.0832	0	0	0	0	0	0.05	0	0	0	0.0224	0	0.0096	0	0.0396	0	0.0286	0	0.1741	0	0.0829	0	0.0472
51474	LIMA1	LIM domain and actin binding 1	2.5113	0.2948	0.5223	0.3773	0.9014	0.4915	0.5718	0.7645	0.4472	0.4712	0.0256	0.246	0.0712	0.6594	1.1317	0.7109	0.4071	0.3501	0.3728	0.422	0.9321	0.8014	0.4151	0.3532	0.4256	0.7225	0.5375	0.3766	0.4718	0.3793	0.3117	0.3784	0.4296	0.4095	0.4719	0.4769	0.4742	0.484	0.605	0.6241	0.8453	0.4179	0.3874	0.4805	0.6366	1.0861	0.4807
339487	ZBTB8OS	zinc finger and BTB domain containing 8 opposite strand	0.1841	0.061	0.0963	1.6162	0.2315	0.079	0.6714	0.0936	0.4984	0.1347	0.8255	1.142	0.0487	0.4791	0.0945	0.1498	0	0.0456	0.0552	0.0385	0	1.4621	0.0449	0.0815	0.1673	1.7302	0.0596	0.0743	0.1859	1.8325	0.3245	0.0623	0.1984	0.985	0.3162	1.0577	0.3889	0.0985	0.1658	0.0853	0.4432	0.0416	0.2586	0.1092	0	0.0857	0.16
7726	TRIM26	tripartite motif containing 26	0.0846	0	0	0.0095	0.0516	0.0525	0.0426	0.0477	0.0051	0.0658	0.0591	0.026	0.0032	0.0255	0.2751	0.05	0.0088	0	0	0.0027	0.0199	0.0579	0.0129	0.0399	0.0148	0.0169	1.0754	0.009	0.0111	0.2474	0.0053	0.0137	0.0101	0.5204	0	0.0349	0.0228	0.0281	0	0.0272	0	0	0.0464	0.0816	0.0248	0.0233	0.0111
23165	NUP205	nucleoporin 205kDa	0.2546	0.1198	0.2196	0.1805	0.7217	0.4975	0.4142	0.585	0.5294	0.3417	0.4407	0.2995	0.0655	0.1932	0.1235	0.1677	0.1408	0.0357	0.0826	0.067	0.3028	0.1822	0.1077	0.0564	0.1422	0.0507	0.1783	0.0803	0.2944	0.1593	0.2729	0.163	0.0835	0.2933	0.4497	0.3221	0.2257	0.4052	0.4179	0.258	0.8	0.1219	0.3443	0.0946	0.444	0.462	0.1344
7402	UTRN	utrophin	2.7338	1.7615	1.6468	0.465	1.3061	0.9194	0.4958	1.8361	0.7441	1.5566	0.6573	1.9645	0.1297	1.4247	0.8571	1.0692	0.7279	0.9513	0.8509	0.6103	0.9376	2.455	0.4081	2.6118	0.7346	2.0027	0.7911	0.6769	0.8512	0.6143	1.1038	0.3514	0.6479	0.8745	1.4375	0.5994	0.7422	0.5812	1.2541	0.6462	0.6729	0.2344	0.4799	0.465	1.1007	1.7883	0.4463
10226	PLIN3	perilipin 3	11.023	0.7127	4.4336	0.8159	10.483	1.3063	9.1893	2.4258	9.1231	2.053	1.2241	0.6332	0.3152	0.7568	2.4201	2.5359	2.4569	0.8544	0.5358	0.5756	2.7583	0.8977	0.6422	0.62	2.2695	0.6926	1.2556	1.1101	1.2249	1.0621	1.7184	0.9408	1.1853	1.9844	2.2379	0.614	1.5547	0.6656	3.018	0.6496	2.7212	0.4317	6.6199	1.1619	2.0946	1.7323	0.9349
84299	MIEN1	migration and invasion enhancer 1	1.3766	0.2377	0.2656	0.1585	2.5887	1.3735	0.5779	0	0.5479	2.0022	2.7914	2.7369	0	1.5542	0	0	0.2087	0.3912	0	0.2683	0	0.5502	0	0.7001	0.5338	0.3227	1.471	0.9456	0.4935	1.7699	2.0628	1.3521	1.2534	1.5507	2.0725	1.2118	1.3081	2.9585	2.48	1.538	0.3092	0.8243	0.3637	0.5075	0	1.0273	0
5313	PKLR	pyruvate kinase, liver and RBC	56.6691	15.8239	28.8987	21.3037	17.0942	25.4394	50.8286	34.8571	67.3256	18.0674	91.1991	24.1885	10.1625	26.2088	47.1909	21.4354	38.6728	5.201	58.2041	3.305	51.7654	27.7369	4.3776	18.6958	40.281	11.8339	50.5944	12.5457	33.4071	29.5169	49.1314	24.7818	13.6255	13.3921	15.0223	16.9316	13.7882	17.529	32.9225	11.3267	41.1731	4.057	67.7604	21.3337	5.4579	20.0982	17.5663
10157	AASS	aminoadipate-semialdehyde synthase	0.0213	1.2217	0.05	1.7519	3.8807	3.9917	0.0344	0.7163	0.0424	0.7242	0.2785	1.5805	0	2.6854	0.549	3.816	0.4293	0.9446	0	0.0635	0.1433	1.1399	0.0319	3.0331	0.1221	1.6116	0.0158	1.7748	0.8072	4.6634	0.6092	1.6383	0.0501	4.2223	0.2882	2.3205	0.0386	4.1698	0.7526	0.7913	0.4512	0.537	0.2272	2.1366	0.2636	0.9488	0.0138
3684	ITGAM	integrin, alpha M (complement component 3 receptor 3 subunit)	0.0394	0.0312	0.7263	0.0035	0.4895	0	0.3324	0.0161	0.2019	0.056	0.1544	0.0154	0.0183	0.0288	0.1358	0.0172	0.0456	0.0061	0.0677	0.0132	0.1244	0	0.0153	0	0.0847	0.0029	0.3165	0.0038	0.0717	0	0.3475	0.0771	0.079	0.151	0.2858	0.1041	0.3502	0.385	0.3279	0.0045	0.0412	0	0.1055	0	0.2234	0.0165	0.2834
79039	DDX54	DEAD (Asp-Glu-Ala-Asp) box polypeptide 54	0.0322	0	3.1257	0.0039	0.3588	0.0075	2.7495	0.0059	1.9187	0.0098	0.0884	0.0055	0.006	0.0036	0.0551	0.0395	0.0111	0	0.0057	0	0.087	0.0181	0.0488	0.0248	0.0147	0.0116	0.0798	0	0.103	0.0294	0.0507	0.0179	0.1737	0.0191	0.0318	0.0187	0.0431	0.0135	0.0329	0.0113	0.0289	0	0.018	0.0081	0.0554	0.0229	0.0464
440145	MZT1	mitotic spindle organizing protein 1	1.1657	1.5001	0.5225	0.4942	0.2888	0.4903	0.3027	0.2126	0.3757	1.6427	0.6567	0.1311	0.1036	0.7426	1.6995	1.8414	1.6945	0	0.2192	0.0437	0.4991	0.7762	0.1913	0	0.1726	0.0902	0.0807	0.8131	0.703	1.2742	0.5252	0.4002	0.0829	0.5799	0.6679	0.2398	0.3138	0.2411	0.3994	0.1923	0.39	0.1057	0.4054	0	1.7585	0.2445	0.7292
8495	PPFIBP2	PTPRF interacting protein, binding protein 2 (liprin beta 2)	0.0468	0.0843	0.406	0.074	0.2722	0.0761	0.1435	0.1043	0.0434	0.204	0.0102	0.1265	0.0305	0.0816	0.151	0.1968	0.2843	0.0678	0.0908	0.054	0.0807	0.0972	0.5348	0.161	0.2033	0.1639	0.1689	0.1388	0.147	0.3372	0.1426	0.1557	0.1436	0.1132	0.1304	0.1365	0.0773	0.0757	0.1021	0.5056	0.0543	0.0771	0.1165	0.044	0.0867	0.1309	0.035
83985	SPNS1	spinster homolog 1 (Drosophila)	0.0282	0.1365	0.1903	0.0321	0.4624	0.0861	0.3818	0.0911	0.345	0.1608	0.2123	0.1784	0.0253	0.0549	0.0872	0.0844	0.1901	0.0107	0.0923	0	0.1576	0.117	0.0673	0.0421	0.1329	0.0353	0.191	0.1209	0.0969	0.1199	0.1611	0.1546	0.0594	0.1138	0.226	0.1294	0.2402	0.1309	0.1964	0.1206	0.0823	0.2084	0.2559	0.0664	0.2689	0.0512	0.1198
118460	EXOSC6	exosome component 6	3.2887	0.0506	0.0531	0.0658	0.0937	0.1368	0.086	0.1187	0.1303	0.1315	0.1319	0.1126	0.0258	0.0743	0	0.1856	0	0.0537	0.0577	0.0236	0.1281	0.0867	0.0362	0.2779	0.3278	0.0462	0	0.1297	0.0716	0.1135	0.089	0.0814	0	0.1701	0.1107	0	0.1295	0.1201	0.1873	0.1122	0.0989	0	0.0814	0.062	0.039	0.1304	0.0816
84869	CBR4	carbonyl reductase 4	0.5663	20.3592	0.2633	19.2446	0.3396	6.1073	0.2554	8.2927	0.2429	5.4497	10.0063	14.7738	0.0808	33.9425	27.2137	8.1206	0.354	2.389	0.0716	2.0622	0.5939	8.0925	4.7869	30.2839	0.2297	2.9816	0.2623	7.2367	6.9778	10.2656	0.2623	7.1596	0.1274	10.6304	0.5849	5.6464	0.5571	9.5112	0.4433	4.3526	1.4858	4.1663	1.06	4.2574	0.6796	6.8084	0.1564
2990	GUSB	glucuronidase, beta	0.0546	0.0204	0	0.0683	0.0681	0.0749	0.1719	0.4969	0.7446	0.1017	0.0583	0.2237	0	0.0791	0.0119	0.4484	0	0.0502	0	0.0309	0.0158	0.0785	0.0097	0.245	0.0386	0.243	0.0117	0.0516	0.0234	0.1977	0.0159	0.0342	0	0.2049	0.0353	0.0569	0.028	0.0709	0.0108	0.0096	0.1259	0.1983	0	0.082	0	0.136	0
3898	LAD1	ladinin 1	2.004	0.1338	0	1.0528	0	0.4099	0	0.0372	0	0.772	0	0.055	0.0005	0.1552	0.1123	0.5503	0.0876	0.0514	0	0.0313	0	1.4067	0	0.5927	0	0.7378	0.0114	1.1356	0.3971	0.4294	0	0.5531	0	0.2926	0	0.3909	0	0.4778	0	0.1429	0	0.2167	0	0.336	0	0.0474	0
9552	SPAG7	sperm associated antigen 7	0.2335	0.1002	0	0	0	0.2508	0.3557	0.2865	0.3307	0.1263	0.0704	0.1834	0.0419	0.3462	0	0.091	0.0502	0.1138	0.064	0.0686	0.4519	0.1244	0.0957	0.0213	0.3283	0.044	0.5989	0.1801	0.5171	0.3884	0.541	0.3364	0.2021	0.3926	0.3944	0.29	0.0293	0.0479	0.0721	0.3717	0.1989	0	0.161	0.0854	0.179	0.0689	0.0593
4301	MLLT4	myeloid/lymphoid or mixed-lineage leukemia (trithorax homolog, Drosophila); translocated to, 4	1.1281	0.4607	0.3618	0.3711	0.3097	0.2776	0.3365	0.1554	0.4915	1.0638	0.055	0.5812	0.1402	0.5555	0.7274	0.8694	0.4599	0.1632	0.4057	0.0595	0.2934	0.3737	0.1818	0.5257	0.4557	0.1882	0.3172	0.2255	0.2438	0.5874	0.2776	0.2967	0.3022	0.2679	0.2473	0.2051	0.2186	0.4124	0.1517	0.1748	0.1918	0.4794	0.0788	0.6681	0.3386	0.4364	0.2163
8895	CPNE3	copine III	6.2639	1.2192	3.4247	3.0427	2.9814	1.3729	3.8609	2.0167	4.59	1.9184	6.3442	2.6144	0.5289	1.7037	3.2793	3.3714	2.3057	1.0536	4.7097	0.5299	3.2345	2.2814	0.8073	2.0716	2.0046	2.1303	0.6259	0.8741	0.727	1.2272	0.9593	0.9603	0.4437	0.7013	0.7716	0.7071	0.5455	0.8373	1.6263	0.6745	3.1384	0.6699	5.5718	1.8358	0.5138	2.3743	0.9553
[truncated: 16,197 more rows]
[truncated: 417 more columns]

## Sheet: Matrix MBR
Genes ID	Gene Symbol	ccRCC_80_TA	ccRCC_196_TA	ccRCC_132_TA	ccRCC_36_TA	ccRCC_109_TA	ccRCC_19_TA	ccRCC_225_TA	ccRCC_155_TA	ccRCC_156_TA	ccRCC_214_TA	ccRCC_230_TA	ccRCC_208_TA	ccRCC_216_TA	ccRCC_161_TA	ccRCC_158_TA	ccRCC_157_TA	ccRCC_146_TA	ccRCC_145_TA	ccRCC_138_TA	ccRCC_144_TA	ccRCC_192_TA	ccRCC_39_TA	ccRCC_97_TA	ccRCC_98_TA	ccRCC_181_TA	ccRCC_133_TA	ccRCC_17_TA	ccRCC_54_TA	ccRCC_187_TA	ccRCC_62_TA	ccRCC_205_TA	ccRCC_207_TA	ccRCC_46_TA	ccRCC_86_TA	ccRCC_95_TA	ccRCC_89_TA	ccRCC_91_TA	ccRCC_153_TA	ccRCC_139_TA	ccRCC_154_TA	ccRCC_209_TA	ccRCC_204_TA	ccRCC_213_TA	ccRCC_151_TA	ccRCC_228_TA	ccRCC_69_TA	ccRCC_77_TA	ccRCC_203_TA
[truncated: 16,915 more rows]
[truncated: 416 more columns]
