# Supplementary material for: A Proteogenomic Atlas of Clear Cell Renal Cell Carcinoma in a Chinese Population
Source: Research Square preprint supplement (doi:10.21203/rs.3.rs-221123/v1), 2021-02-26
Supplement: Supplementary file 3 [file 0c8cffd4d52f97eb7bd8e56f.xlsx]

## Sheet: Description
Table S1: Clinical characteristics of 232 Chinese ccRCC patients and abbreviations used in the text.
Clinical characteristics	Clinical characteristics of 232 Chinese ccRCC patients
Statistics	Statistics of clinical informations
Abbreviations	Abbreviations and corresponding full names

## Sheet: Clinical characteristics
ccRCC No.	Age	Gender	BMI	Height_in_cm	Weight_in_kg	Hypertension	Diabetes	Cardiovascular and Cerebrovascular Diseases	Family history of cancer	Subtype	Tumor Size in cm	Primary Tumor Location	T	N	M	Stage(TNM)	Stage	ISUP grade	Live Status	OS(month)	First site of recurrence	Progression	PFS(Month)
ccRCC_001	30	Male	/	/	/	No	No	No	No	ccRCC	7x6.5x8.5	Right Kidney	3b	0	0	T3bN0M0	III	4	death	84	Kidney, Bones	Yes	18
ccRCC_002	44	Female	/	/	/	No	No	No	No	ccRCC	6x6x5 ;0.6x0.6x0.6	Left Kidney	1b	0	1	T1bN0M1	IV	3	death	38	Head, Kidney	Yes	7
ccRCC_003	67	Male	/	/	/	No	No	No	No	ccRCC	6x5x4.5	Left Kidney	1b	0	0	T1bN0M0	I	2	death	14	/	Yes	3
ccRCC_004	33	Male	23.6614	172	70	No	No	No	Yes	ccRCC	4.5x4x3	Left Kidney	1b	0	0	T1bN0M0	I	3	living	138	Kidney, Adrenal gland, Head, Bones	Yes	37
ccRCC_005	84	Male	/	/	75	No	No	No	Yes	ccRCC	4x4x2.5	Right Kidney	1a	0	0	T1aN0M0	I	1	death	83	/	Yes	23
ccRCC_006	70	Female	17.898	155	43	No	No	No	Yes	ccRCC	4.5x4.5x3	Right Kidney	1b	0	0	T1bN0M0	I	3	death	98	Kidney	Yes	94
ccRCC_007	54	Female	/	/	/	No	No	No	No	ccRCC	7x6x6	Right Kidney	3a	1	1	T3N1M1	IV	4	death	7	Neck	Yes	3
ccRCC_008	57	Male	23.8281	160	61	No	No	No	No	ccRCC	5	Right Kidney	1b	0	1	T1bN0M1	IV	4	death	13	Liver	Yes	3
ccRCC_009	49	Female	20.3125	160	52	Yes	No	No	No	ccRCC	3.5x3x3	Right Kidney	1a	0	0	T1aN0M0	I	2	living	125	/	No	125
ccRCC_010	57	Male	22.4913	170	65	No	No	No	No	ccRCC	4x4x3	Right Kidney	1a	0	0	T1aN0M0	I	2	living	124	/	No	124
ccRCC_011	34	Female	21.6441	155	52	No	No	No	No	ccRCC	6.0x5.0x5.0	Right Kidney	1b	0	0	T1bN0M0	I	3	death	59	Kidney	Yes	24
ccRCC_012	56	Male	26.8923	167	75	No	No	No	Yes	ccRCC	9x7x7	Left Kidney	2a	0	0	T2aN0M0	IV	3	death	22	Bones, shins, collarbones, Kidney	Yes	17
ccRCC_013	74	Male	18.7242	176	58	No	No	No	No	ccRCC	7.0x6.0x5.5	Left Kidney	3a	0	1	T3aN0M1	IV	3	death	22	Neck	Yes	8
ccRCC_014	50	Female	25.3906	160	65	Yes	No	Yes	No	ccRCC	5.0x4.0x4.0	Left Kidney	1b	0	0	T1bN0M0	I	2	living	122	Pancreatic	Yes	115
ccRCC_015	58	Male	25.6055	170	74	No	No	No	No	ccRCC	6.0x3.0x4.0	Left Kidney	3a	0	0	T3aN0M0	I	2	living	119	/	No	119
ccRCC_016	64	Male	28.0557	172	83	No	No	No	No	ccRCC	13x6x6	Right Kidney	2a	0	0	T2bN0M0	II	2	living	119	/	No	119
ccRCC_017	59	Male	22.8374	170	66	No	No	No	No	ccRCC	4.3x4.0	Left Kidney	1b	0	0	T1bN0M0	I	2	living	118	/	No	119
ccRCC_018	51	Female	23.4375	160	60	Yes	No	No	No	ccRCC	12.5x9x6	Right Kidney	3a	1	0	T3N1M0	III	3	death	26	Lymph nodes after the peritoneum , Kidney	Yes	7
ccRCC_019	63	Male	21.9671	168	62	No	No	No	No	ccRCC	5.0x4.0x3.0	Right Kidney	1b	0	0	T1bN0M0	I	2	living	118	/	No	118
ccRCC_020	63	Male	23.03	168	65	No	No	No	No	ccRCC	4x3x3	Left Kidney	1a	0	0	T1aN0M0	I	2	living	117	/	No	117
ccRCC_021	51	Male	23.6614	172	70	No	No	No	No	ccRCC	2.5x2.2x2.0	Right Kidney	1a	0	0	T1aN0M0	I	3	living	117	/	No	117
ccRCC_022	69	Female	/	/	/	No	Yes	No	No	ccRCC	3x2.5x2	Right Kidney	1a	0	1	T1aN0M1	II	3	living	117	Kidney	Yes	48
ccRCC_023	65	Male	23.04	178	73	Yes	No	No	No	ccRCC	8x7x6	Left Kidney	2a	0	0	T2aN0M0	II	4	living	116	Kidney	Yes	97
ccRCC_024	57	Female	18.9164	165	51.5	No	No	No	No	ccRCC	7.5x6.0x4.5	Left Kidney	3a	1	0	T3aN1M0	III	3	death	46	Kidney	Yes	19
ccRCC_025	41	Male	22.7903	174	69	No	No	No	No	ccRCC	7.0x6.0x5.0	Left Kidney	1b	0	0	T1bN0M0	I	3	living	114	Kidney	Yes	43
ccRCC_026	71	Male	21.3669	181	70	No	No	No	Yes	ccRCC	4.5x3.0x3.0	Right Kidney	3a	0	1	T3aN0M1	IV	3	death	35	Kidney	Yes	11
ccRCC_027	41	Male	22.8374	170	66	No	No	No	No	ccRCC	7x7x6	Right Kidney	3a	0	0	T3NxM0	I	2	living	113	/	No	113
ccRCC_028	30	Male	/	/	/	No	No	No	No	ccRCC	2.2x2x1.7	Left Kidney	1a	0	0	T1aN0M0	I	2	living	112	/	No	112
ccRCC_029	55	Female	/	/	/	Yes	No	No	No	ccRCC	8x7x6	Left Kidney	2a	0	0	T2aN0M0	II	3	living	111	Head , Kidney , Liver	Yes	58
ccRCC_030	44	Male	25.4028	166	70	No	Yes	No	No	ccRCC	Right Kidney: 1.8x1.6x1.2;Left Kidney: 3.0x3.0x3.5 and diameter: 1.0	bilateral renal cell carcinoma	1a	0	0	T1aN0M0	I	3	living	111	Kidney	Yes	50
ccRCC_031	59	Male	/	/	79	Yes	No	No	No	ccRCC	4.0x3.5x3.0	Left Kidney	1a	0	0	T1aN0M0	I	3	living	111	/	No	111
ccRCC_032	38	Male	24.4898	175	75	No	No	No	No	ccRCC	6.0x5.0x4.5	Right Kidney	1b	0	0	T1bN0M0	I	3	living	110	/	No	110
ccRCC_033	45	Female	/	/	/	No	No	No	No	ccRCC	10.0x7.5x6.0	Left Kidney	2a	0	0	T2aN0M0	II	3	death	17	Kidney	Yes	6
ccRCC_034	66	Female	20.4082	140	40	No	Yes	No	No	ccRCC	3x5x4	Left Kidney	3a	0	0	T3N0M0	III	2	living	109	/	No	109
ccRCC_035	43	Male	31.1419	170	90	Yes	No	No	No	ccRCC	4.5x3x3	Left Kidney	1b	0	0	T1bN0M0	I	2	living	109	/	No	109
ccRCC_036	47	Male	/	/	/	No	No	No	No	ccRCC	6.0x4.0x2.5	Left Kidney	1b	0	0	T1bN0M0	I	3	living	109	/	No	109
ccRCC_037	47	Female	/	/	/	No	Yes	No	Yes	ccRCC	7x7x4	Left Kidney	2a	0	0	T2aN0M0	II	4	death	96	/	Yes	78
ccRCC_038	55	Male	20.5499	168	58	No	No	No	No	ccRCC	4.0x3.5x3.0	Left Kidney	1a	0	0	T1aN0M0	I	3	living	108	/	No	108
ccRCC_039	56	Male	25.4581	167	71	No	No	Yes	No	ccRCC	7.5x7.0x5.0	Right Kidney	2a	0	0	T2aN0M0	II	3	living	108	/	No	108
ccRCC_040	64	Female	28.4799	159	72	Yes	No	No	No	ccRCC	3.5x3.0x3.0	Left Kidney	1a	0	0	T1aN0M0	I	3	living	108	/	No	108
ccRCC_041	43	Female	23.4375	160	60	No	No	No	No	ccRCC	9x10x8	Right Kidney	2a	0	0	T2aN0M0	II	4	death	30	Behind the lower cavity veins	Yes	7
ccRCC_042	49	Male	27.4145	174	83	Yes	No	No	No	ccRCC	4.0x3.5x2.8	Left Kidney	1a	0	0	T1aN0M0	I	3	living	108	/	No	108
ccRCC_043	55	Male	21.2585	168	60	No	No	No	No	ccRCC	10x6x5	Left Kidney	3a	0	1	T3N0M1	IV	4	death	31	Left shoulder, Kidney , Bones	Yes	22
ccRCC_044	40	Male	/	/	/	No	No	Yes	No	ccRCC	6.5x5x5	Left Kidney	1b	0	0	T1bN0M0	I	2	living	107	/	No	107
ccRCC_045	52	Male	20.2449	175	62	No	No	No	No	ccRCC	3.5x3.0x3.0	Right Kidney	3a	0	0	T3aN0M0	III	3	living	105	Kidney	Yes	17
ccRCC_046	31	Male	24.6914	180	80	No	No	No	No	ccRCC	6.0x5.0x5.0	Right Kidney	1b	0	0	T1bN0M0	I	3	death	96	Bones, Left Kidney, Adrenal gland	Yes	27
ccRCC_047	62	Male	25.8264	176	80	Yes	No	No	No	ccRCC	6.0x6.0x4.5	Right Kidney	3a	1	0	T3aN1M0	III	4	death	27	Lower cavity venous cancer hydrantLower cavity venous cancer hydrant , Liver	Yes	4
ccRCC_048	58	Male	25.2595	170	73	Yes	Yes	No	No	ccRCC	4.5x4x4	Right Kidney	1b	0	0	T1bN0M0	I	3	living	105	/	No	105
ccRCC_049	58	Female	28.959	162	76	No	No	No	No	ccRCC	7x6x6	Left Kidney	1b	0	0	T1bN0M0	III	4	death	28	Kidney	Yes	3
ccRCC_050	17	Male	25.9516	170	75	No	No	No	No	ccRCC	7x8x6	Right Kidney	3a	1	0	T3aN1M0	III	4	death	25	/	Yes	4
ccRCC_051	60	Male	22.6422	182	75	No	No	No	No	ccRCC	4.5x5x4	Right Kidney	1b	0	0	T1bN0M0	I	2	living	104	Kidney, Pancreatic, Post-peritoneal transfer	Yes	73
ccRCC_052	59	Male	23.8751	165	65	No	No	No	No	ccRCC	3.5x3.5x3	Left Kidney	1a	0	0	T1aN0M0	I	3	living	104	Kidney , Bones	Yes	17
ccRCC_053	57	Male	21.4844	160	55	Yes	No	No	No	ccRCC	3x2x2	Left Kidney	1a	0	0	T1aN0M0	I	3	death	89	Liver	Yes	72
ccRCC_054	51	Female	/	/	/	No	No	No	No	ccRCC	14x8x8	Left Kidney	3a	0	0	T3aN0M0	I	2	living	103	Kidney	Yes	54
ccRCC_055	55	Female	23.4375	160	60	Yes	No	No	No	ccRCC	5x4x4	Left Kidney	3a	0	0	T3aN0M0	III	2	living	103	/	No	103
ccRCC_056	49	Male	23.3887	173	70	No	No	No	No	ccRCC	5.0x5.0x4.0	Left Kidney	1b	0	0	T1bN0M0	I	3	living	103	/	No	103
ccRCC_057	56	Male	/	/	/	No	No	No	No	ccRCC	4×3.5×3.5	Left Kidney	1a	0	0	T1aN0M0	I	2	living	102	/	No	102
ccRCC_058	55	Male	17.4191	166	48	No	No	No	No	ccRCC	7×6×4	Left Kidney	3b	0	1	T3bN0M1	IV	4	death	26	Kidney , Kidney venous cancer hydrant	Yes	7
ccRCC_059	52	Male	24.6914	180	80	No	No	No	No	ccRCC	3.5x3x1.8	Left Kidney	1a	0	0	T1aN0M0	I	3	living	102	/	No	102
ccRCC_060	60	Female	/	/	/	No	No	No	No	ccRCC	9x9x5	Left Kidney	2a	0	1	T2aN0M1	IV	2	living	101	Pancreatic	Yes	23
ccRCC_061	63	Male	22.3214	168	63	No	No	No	No	ccRCC	6×5×4	Right Kidney	1b	0	0	T1bN0M0	I	3	living	101	Left Adrenal gland	Yes	38
ccRCC_062	37	Female	25	160	64	No	No	No	No	ccRCC	4.5x4.5x5.0	Left Kidney	1b	0	0	T1bN0M0	I	2	living	100	/	No	100
ccRCC_063	61	Female	/	/	/	No	No	No	No	ccRCC	5.0x4.5x3.0	Left Kidney	1b	0	0	T1bN0M0	I	2	living	100	/	No	100
ccRCC_064	49	Male	25.9516	170	75	Yes	Yes	No	No	ccRCC	12×9×8.5	Left Kidney	3a	0	0	T3aN0M0	III	2	death	69	Kidney	Yes	25
ccRCC_065	46	Female	22.3214	168	63	No	No	No	No	ccRCC	4.5x4x4.5	Right Kidney	1b	0	0	T1bN0M0	I	3	living	99	/	No	99
ccRCC_066	25	Male	26.3656	172	78	No	No	No	No	ccRCC	4.5x3.5x3.5	Right Kidney	1b	0	0	T1bN0M0	I	2	living	99	/	No	99
ccRCC_067	47	Male	29.3878	175	90	No	No	Yes	No	ccRCC	9x8x7	Right Kidney	2a	0	0	T2aN0M0	II	4	living	98	/	Yes	27
ccRCC_068	59	Male	/	/	/	No	No	No	No	ccRCC	3.5x3.2x2.8	Left Kidney	1a	0	0	T1aN0M0	I	2	living	98	/	No	98
ccRCC_069	65	Female	25.9695	152	60	No	No	No	Yes	ccRCC	4x4x3.8	Right Kidney	1a	0	0	T1aN0M0	I	2	living	98	/	No	98
ccRCC_070	43	Male	26.0276	172	77	No	No	No	No	ccRCC	4.5×4.5×3	Left Kidney	1b	0	0	T1bN0M0	I	2	living	98	/	No	98
ccRCC_071	28	Male	29.3848	165	80	No	No	No	Yes	ccRCC	3.5x3.0x3.0	Right Kidney	1a	0	0	T1aN0M0	I	3	living	98	/	No	98
ccRCC_072	61	Female	26.6389	155	64	No	No	No	No	ccRCC	6.5x5.0x4.5	Right Kidney	4	0	0	T3N0M0	III	3	living	98	/	No	98
ccRCC_073	23	Female	20.5457	156	50	No	No	No	No	ccRCC	3.5x3x2	Left Kidney	1a	0	0	T1aN0M0	I	3	living	97	/	No	97
ccRCC_074	40	Female	/	/	55	No	No	No	No	ccRCC	3.8x3x2	Left Kidney	1a	0	0	T1aN0M0	I	2	living	97	/	No	97
ccRCC_075	54	Male	24.2215	170	70	No	No	No	No	ccRCC	3.0x2.5x2.0	Left Kidney	1a	0	0	T1aN0M0	I	2	living	96	/	No	96
ccRCC_076	39	Female	25.4028	166	70	No	No	No	No	ccRCC	4.5x3.5x3.0	Right Kidney	1b	0	0	T1bN0M0	I	2	living	96	/	No	96
ccRCC_077	47	Female	/	/	/	No	No	No	No	ccRCC	5.6x5.3x4.2	Left Kidney	1b	0	0	T1bN0M0	I	3	living	96	/	No	96
ccRCC_078	61	Male	23.8754	170	69	Yes	No	No	No	ccRCC	5.0×3.8×3.3	Left Kidney	1b	0	0	T1bN0M0	I	3	living	95	/	No	95
ccRCC_079	42	Female	20.5457	156	50	No	No	No	No	ccRCC	4.3x3.0x3.2	Right Kidney	1b	0	0	T1bN0M0	I	2	living	95	/	No	95
ccRCC_080	64	Male	21.9713	172	65	No	No	No	No	ccRCC	3.5x2.5x2.0	Left Kidney	1a	0	0	T1aN0M0	I	3	living	95	/	No	95
ccRCC_081	57	Female	18.7328	165	51	Yes	No	No	No	ccRCC	7.5x6.5x6.0	Right Kidney	2a	0	0	T2aN0M0	II	2	living	94	/	No	94
ccRCC_082	37	Male	/	/	63	No	No	No	No	ccRCC	7x6.5x6	Right Kidney	1b	0	0	T1bN0M0	I	3	living	94	/	No	94
ccRCC_083	49	Male	25.9516	170	75	No	No	No	No	ccRCC	9x8x8	Left Kidney	T3a	1	1	T3aN1M1	IV	4	death	16	Lymph nodes after the peritoneum , Kidney , Bones	Yes	5
ccRCC_084	47	Male	27.7551	175	85	No	No	No	No	ccRCC	4.5x3.8x3.0	Left Kidney	1b	0	0	T1bN0M0	I	2	living	94	/	No	94
ccRCC_085	41	Male	/	/	/	No	No	No	No	ccRCC	4.0x3.5x3.0	Right Kidney	1a	0	0	T1aNxM0	I	3	living	93	/	No	93
ccRCC_086	50	Male	27.102	175	83	Yes	No	No	No	ccRCC	3.0x3.2x2.5	Right Kidney	1a	0	0	T1aN0M0	I	3	living	92	/	No	92
ccRCC_087	45	Male	27.4286	175	84	No	Yes	No	No	ccRCC	8x4x5	Left Kidney	2a	0	0	T2aN0M0	II	2	living	92	/	No	92
ccRCC_088	53	Female	20.6905	157	51	No	No	No	No	ccRCC	6.5x6.0x5.0	Right Kidney	1b	0	0	T1bN0M0	I	2	living	91	/	No	92
ccRCC_089	73	Female	22.0604	155	53	No	No	No	No	ccRCC	5x4x3.5	Left Kidney	1b	0	0	T1bN0M0	I	3	living	91	/	No	91
ccRCC_090	47	Female	43.7098	165	119	Yes	No	No	No	ccRCC	8.6x7.0x5.0	Left Kidney	2a	0	0	T2aN0M0	II	3	living	91	/	No	91
ccRCC_091	39	Female	29.6427	158	74	No	No	No	No	ccRCC	2.3x1.5x1.4	Right Kidney	1a	0	0	T1aN0M0	I	2	living	91	/	No	91
ccRCC_092	68	Female	/	/	/	Yes	No	No	No	ccRCC	5x5x4.5	Right Kidney	1b	0	0	T1bN0M0	I	2	living	91	/	No	91
ccRCC_093	72	Male	22.3214	168	63	No	No	No	No	ccRCC	9.5x7.0x7.0	Left Kidney	2a	0	0	T2aN0M0	II	3	living	91	/	No	91
ccRCC_094	53	Male	26.079	165	71	No	Yes	No	No	ccRCC	4.5x3.5x4	Left Kidney	1b	0	0	T1bN0M0	I	3	death	45	Widespread transfer	Yes	12
ccRCC_095	57	Male	25.8645	168	73	Yes	Yes	No	No	ccRCC	6.7x6.0x4.8	Left Kidney	1b	0	0	T1bN0M0	I	3	living	90	/	No	90
ccRCC_096	70	Male	27.1809	165	74	Yes	No	No	No	ccRCC	4x4.2x2.8	Right Kidney	1a	0	0	T1aN0M0	I	3	living	90	/	No	90
ccRCC_097	39	Male	23.6713	178	75	No	No	No	No	ccRCC	5.5x5x4	Right Kidney	1b	0	0	T1bN0M0	I	3	living	90	/	No	90
ccRCC_098	49	Female	23.03	168	65	No	No	No	No	ccRCC	5.1x5.0x4.4	Right Kidney	1b	0	0	T1bN0M0	I	3	living	90	/	No	90
ccRCC_099	64	Male	23.3067	167	65	No	No	No	No	ccRCC	5.0x4.5x4.0	Right Kidney	3b	1	1	T3bN1M1	IV	3	death	3	Lymph nodes after the peritoneum , Bones,Kidney	Yes	1
ccRCC_100	60	Male	27.8876	155	67	Yes	Yes	No	Yes	ccRCC	8×6×6	Left Kidney	2a	0	0	T2aN0M0	II	3	living	89	Kidney	Yes	18
ccRCC_101	58	Male	22.921	176	71	No	No	No	Yes	ccRCC	4x3x2	Left Kidney	1a	0	0	T1aN0M0	I	3	living	88	/	No	88
ccRCC_102	49	Male	22.8374	170	66	No	No	No	No	ccRCC	8.5×7.0×6.5	Left Kidney	2a	0	0	T2aN0M1	IV	2	death	10	Liver	Yes	2
ccRCC_103	66	Male	24.2215	170	70	Yes	No	Yes	No	ccRCC	6.5x5.0x4.8	Right Kidney	1b	0	0	T1bN0M0	III	3	death	17	Kidney and Waist muscle	Yes	20
ccRCC_104	53	Male	/	/	/	No	No	No	No	ccRCC	10x6.5x6.0	Right Kidney	3a	1	1	T3aN1M1	IV	4	death	24	Pulmonary, rib, post-abdominal wall, post-peritoneal lymph node stompano	Yes	7
ccRCC_105	50	Female	/	/	/	No	No	No	No	ccRCC	2x2x1.5	Left Kidney	1a	0	0	T1aN0M0	I	3	living	88	/	No	88
ccRCC_106	51	Male	23.1834	170	67	No	No	No	No	ccRCC	11x9x5.5	Left Kidney	2b	0	0	T2bN0M0	II	3	death	38	Kidney	Yes	21
ccRCC_107	64	Female	26.2336	161	68	Yes	No	No	No	ccRCC	9.5x6.5x5.0	Left Kidney	2a	0	1	T2aN0M1	IV	4	death	36	peritoneal metastasis, relapse of the kidney region, pulmonary metastasis	Yes	9
ccRCC_108	52	Female	22.0317	158	55	No	No	No	No	ccRCC	8x6.5x6	Right Kidney	2a	0	0	T2aN0M0	II	2	living	87	/	No	87
ccRCC_109	55	Male	27.4725	182	91	No	Yes	No	No	ccRCC	8x6x5	Right Kidney	2a	0	1	T2aN0M1	IV	3	death	11	Kidney, Bones	Yes	3
ccRCC_110	60	Male	26.7299	173	80	Yes	No	No	No	ccRCC	5.5x5.0x4.0	Left Kidney	1b	0	0	T1bN0M0	I	2	living	87	/	No	87
ccRCC_111	53	Male	27.5482	165	75	Yes	No	No	No	ccRCC	3×3×3	Left Kidney	1a	0	0	T1aN0M0	I	3	death	83	Kidney, Bones	Yes	28
ccRCC_112	61	Male	23.3067	167	65	Yes	No	No	No	ccRCC	4×3.5×2	Right Kidney	1a	0	0	T1aN0M0	I	2	living	86	/	No	86
ccRCC_113	48	Male	28.7356	174	87	Yes	No	No	No	ccRCC	4.5x3x2	Right Kidney	1b	0	0	T1bN0M0	I	3	living	86	/	No	86
ccRCC_114	48	Male	27.4691	180	89	Yes	No	No	No	ccRCC	1.8x1.6x1.0	Left Kidney	1a	0	0	T1aN0M0	I	2	living	86	/	No	86
ccRCC_115	47	Female	26.0375	158	65	No	No	No	No	ccRCC	9x8.3x10	Left Kidney	2a	1	0	T2aN1M0	III	3	death	36	Kidney, Bones, Liver, Head	Yes	16
ccRCC_116	48	Male	23.4075	179	75	No	Yes	No	No	ccRCC	3x2.5x2.5	Right Kidney	1a	0	0	T1aN0M0	I	2	living	86	/	No	86
ccRCC_117	61	Male	25.1429	175	77	Yes	No	No	Yes	ccRCC	4.5x4x3	Left Kidney	1b	0	0	T1bN0M0	I	3	living	86	/	No	86
ccRCC_118	63	Male	22.1367	166	61	No	No	No	No	ccRCC	5.5x5x5	Right Kidney	1b	0	0	T1bN0M0	I	2	living	85	/	No	85
ccRCC_119	76	Male	22.2063	163	59	No	No	No	No	ccRCC	1.3x2.5x2.5	Right Kidney	1a	0	0	T1aN0M0	I	2	living	85	/	No	85
ccRCC_120	68	Female	22.8928	155	55	Yes	No	Yes	No	ccRCC	4.5x4x3	Right Kidney	1b	0	0	T1bN0M0	I	2	living	85	Bones	Yes	40
ccRCC_121	41	Female	23.8281	160	61	No	No	No	No	ccRCC	3.5x2.5x2.5	Right Kidney	1a	0	0	T1aN0M0	I	3	living	85	/	No	85
ccRCC_122	66	Male	22.7732	165	62	Yes	No	No	No	ccRCC	5.0x5.0x5.0	Right Kidney	3a	0	0	T3aN0M0	III	4	living	85	/	No	85
ccRCC_123	49	Male	20.0692	170	58	No	No	No	No	ccRCC	8x6x5	Left Kidney	2a	0	0	T2aN0M0	II	3	living	85	/	No	85
ccRCC_124	47	Male	27.6817	170	80	No	No	No	Yes	ccRCC	4×4×3	Left Kidney	3a	1	0	T3aN1M0	III	4	death	6	Kidney	Yes	5
ccRCC_125	70	Male	15.8079	163	42	Yes	No	Yes	No	ccRCC	4x4x3	Right Kidney	1a	0	0	T1aN0M0	I	2	death	72	/	Yes	18
ccRCC_126	58	Male	19.2672	172	57	No	No	No	No	ccRCC	7x7x7	Left Kidney	1b	0	0	T1bN0M0	I	2	living	85	/	No	85
ccRCC_127	62	Male	/	/	/	Yes	Yes	No	No	ccRCC	8x7.5x6.5	Right Kidney	2a	0	0	T2aN0M0	II	4	living	84	/	No	84
ccRCC_128	52	Male	24.9337	178	79	No	No	No	No	ccRCC	7x5x4	Left Kidney	1b	0	0	T1bN0M0	I	3	living	84	/	No	84
ccRCC_129	61	Female	24.3496	153	57	Yes	No	No	No	ccRCC	3.5x3x2.7	Left Kidney	1a	0	0	T1aN0M0	I	3	living	84	/	No	84
ccRCC_130	69	Male	28.4091	176	88	Yes	Yes	No	No	ccRCC	5x3x3	Left Kidney	1b	0	0	T1bN0M0	I	2	living	84	/	No	84
ccRCC_131	76	Male	22.4913	170	65	Yes	No	Yes	No	ccRCC	7x6x3	Right Kidney	1b	0	0	T1bN0M0	I	4	death	30	Intestinal	Yes	7
ccRCC_132	44	Male	32.3232	165	88	No	No	No	No	ccRCC	7.5x7x3.5	Right Kidney	2a	0	0	T2aN0M0	II	2	living	83	/	No	83
ccRCC_133	57	Male	/	/	/	No	No	No	No	ccRCC	5x3.5x3	Right Kidney	1b	0	0	T1bN0M0	I	3	living	83	Kidney	Yes	77
ccRCC_134	60	Female	23.4375	160	60	No	No	No	No	ccRCC	3x3x2	Right Kidney	1a	0	0	T1aN0M0	I	2	living	82	/	No	82
ccRCC_135	62	Male	/	/	/	No	No	No	No	ccRCC	5x4x3	Right Kidney	1b	0	0	T1bN0M0	I	2	living	81	/	No	81
ccRCC_136	58	Female	28.8415	158	72	Yes	No	Yes	No	ccRCC	4.5x4x4	Left Kidney	1b	0	0	T1bN0M0	I	3	living	80	/	No	80
ccRCC_137	64	Male	24.2215	170	70	No	No	No	No	ccRCC	5.7x5.6	Left Kidney	1b	0	0	T1bN0M0	I	3	death	57	Back	Yes	22
ccRCC_138	56	Female	20.7031	160	53	No	No	No	No	ccRCC	4.5x5x3	Left Kidney	1b	0	0	T1bN0M0	I	3	living	80	/	No	80
ccRCC_139	59	Male	23.7253	155	57	No	No	No	No	ccRCC	4.5x4x4	Right Kidney	1b	0	0	T1bN0M0	I	3	living	79	/	No	79
ccRCC_140	48	Female	23.7332	159	60	Yes	No	No	No	ccRCC	5.2x5x3.3	Left Kidney	1b	0	0	T1bN0M0	I	2	living	79	/	No	79
ccRCC_141	50	Male	22.8571	175	70	No	No	No	No	ccRCC	4.5x4.2x4.0	Left Kidney	1b	0	0	T1bN0M0	I	3	living	79	/	No	79
ccRCC_142	63	Male	21.3039	165	58	No	No	No	No	ccRCC	6x5x3.8	Right Kidney	3b	1	1	T3bN1M1	IV	4	death	14	Kidney, Lymph nodes after the peritoneum, Bones, Lymph nodes after the peritoneum, Bones	Yes	13
ccRCC_143	76	Female	17.0656	155	41	No	No	No	No	ccRCC	6×5.5×4	Right Kidney	3b	0	0	T3bN0M0	III	3	death	8	Kidney	Yes	2
ccRCC_144	57	Male	24.6755	172	73	Yes	No	No	No	ccRCC	6.0x4.5x3.0	Right Kidney	1b	0	0	T1bN0M0	I	2	living	78	/	No	78
ccRCC_145	42	Male	26.1738	177	82	No	No	No	No	ccRCC	4x3x3	Left Kidney	1a	0	0	T1aN0M0	I	3	living	78	/	No	78
ccRCC_146	71	Male	17.9931	170	52	No	No	No	Yes	ccRCC	8x6x4.5	Left Kidney	2a	0	0	T2aN0M0	II	2	living	78	/	No	78
ccRCC_147	48	Female	21.5645	164	58	Yes	No	No	Yes	ccRCC	2.0x1.8x1.5	Right Kidney	1a	0	0	T1aN0M0	I	2	living	78	/	No	78
ccRCC_148	51	Male	22.2222	180	72	No	No	No	Yes	ccRCC	7.5x6	Left Kidney	2a	0	0	T2aN0M1	IV	3	living	78	Kidney	Yes	28
ccRCC_149	45	Female	21.3675	156	52	No	No	No	No	ccRCC	5×4.5×4	Right Kidney	1b	0	0	T1bN0M0	I	3	living	77	/	No	77
ccRCC_150	69	Male	22.5981	176	70	Yes	No	No	No	ccRCC	3x3.1x2.8	Left Kidney	1a	0	0	T1aN0M0	I	2	living	77	/	No	77
ccRCC_151	62	Male	22.3863	173	67	Yes	No	No	No	ccRCC	4.5x5x4	Left Kidney	1b	0	0	T1bN0M0	I	4	living	77	/	No	77
ccRCC_152	55	Male	24.3865	162	64	Yes	No	No	No	ccRCC	5.8x4.8	Right Kidney	1b	0	0	T1bN0M0	I	3	living	77	Post-peritoneal lymph node stoustos	Yes	43
ccRCC_153	60	Female	22.8329	158	57	Yes	Yes	No	No	ccRCC	4.7x3.5x2.5	Right Kidney	1b	0	0	T1bN0M0	I	3	living	77	/	No	77
ccRCC_154	70	Male	22.5896	167	63	Yes	No	No	No	ccRCC	5x4x4	Left Kidney	1b	0	0	T1bN0M0	I	3	living	77	/	No	77
ccRCC_155	53	Female	21.4844	160	55	No	No	No	No	ccRCC	2.5x2x2	Right Kidney	1a	0	0	T1aN0M0	I	2	living	77	/	No	77
ccRCC_156	55	Male	25.8264	176	80	Yes	No	No	No	ccRCC	3.5x3x2.5	Left Kidney	1a	0	0	T1aN0M0	I	3	living	77	/	No	77
ccRCC_157	55	Male	29.4118	170	85	No	No	No	No	ccRCC	2×1.8×1.3	Right Kidney	1a	0	0	T1aN0M0	I	1	living	76	/	No	76
ccRCC_158	62	Male	22.7204	173	68	No	No	No	No	ccRCC	3.3×2.7×1.9	Right Kidney	1a	0	0	T1aN0M0	I	2	living	76	/	No	76
ccRCC_159	41	Male	22.0386	165	60	No	Yes	Yes	No	ccRCC	5x4.5x3.5	Left Kidney	1b	0	0	T1bN0M0	I	3	living	76	Kidney	Yes	59
ccRCC_160	30	Male	32.4905	184	110	No	No	No	Yes	ccRCC	4.5x4.5x4	Right Kidney	1b	0	0	T1bN0M0	I	2	living	76	/	No	76
ccRCC_161	60	Male	21.9713	172	65	No	No	Yes	No	ccRCC	3x2.8x2.5	Left Kidney	1a	0	0	T1aN0M0	I	3	living	76	/	No	76
ccRCC_162	75	Male	24.4898	175	75	No	No	No	No	ccRCC	4x2.6x2.5	Right Kidney	1a	0	0	T1aN0M0	I	3	living	76	Kidney	Yes	25
ccRCC_163	55	Male	23.0546	173	69	No	No	No	No	ccRCC	4.5x4x4	Left Kidney	1b	0	0	T1bN0M0	I	3	living	76	/	No	76
ccRCC_164	51	Male	24.6097	165	67	No	No	No	No	ccRCC	5.9x4.6x4.2	Left Kidney	1b	0	0	T1bN0M0	I	2	living	76	/	No	76
ccRCC_165	52	Female	20.7612	170	60	No	No	No	No	ccRCC	6x5x4	Right Kidney	1b	0	0	T1bN0M0	I	3	living	75	Liver	Yes	64
ccRCC_166	62	Female	20	150	45	No	No	No	Yes	ccRCC	7.5x6x4	Left Kidney	2a	0	0	T2aN0M0	II	3	living	75	/	No	75
ccRCC_167	67	Male	33.8021	172	100	Yes	No	Yes	Yes	ccRCC	4	Right Kidney	1a	0	0	T1aN0M1	IV	3	death	70	Kidney	Yes	45
ccRCC_168	66	Male	24.4898	175	75	No	No	No	Yes	ccRCC	4.5x4.5x2	Right Kidney	1b	0	0	T1bN0M0	I	3	living	75	/	No	75
ccRCC_169	50	Female	19.433	162	51	No	No	No	No	ccRCC	9x7x6.5	Left Kidney	3a	0	0	T3aN0M0	III	4	death	29	Kidney	Yes	3
ccRCC_170	52	Female	26.2917	162	69	Yes	No	No	No	ccRCC	3.5x3.2x2.5	Left Kidney	1a	0	0	T1aN0M0	I	3	living	74	/	No	74
ccRCC_171	71	Male	28.7268	171	84	Yes	No	No	No	ccRCC	7.5x4x3	Right Kidney	2a	0	0	T2aN0M0	II	3	death	70	Kidney	Yes	55
ccRCC_172	67	Male	29.0657	170	84	No	No	No	No	ccRCC	4.8x4x2	Right Kidney	1b	0	0	T1bN0M0	I	3	living	73	Kidney	Yes	34
ccRCC_173	62	Male	19.257	169	55	Yes	Yes	No	Yes	ccRCC	3.8x3x2.4	Right Kidney	1a	0	0	T1aN0M0	I	2	living	73	/	No	73
ccRCC_174	34	Female	23.4375	160	60	No	No	No	Yes	ccRCC	4.9x4.7x3.5	Right Kidney	1b	0	0	T1bN0M0	I	2	living	73	/	No	73
ccRCC_175	60	Male	23.4375	160	60	Yes	No	No	No	ccRCC	7.9x6.2x3.5	Left Kidney	3a	0	0	T3aN0M0	III	4	living	73	/	No	73
ccRCC_176	47	Female	21.2585	168	60	No	No	No	Yes	ccRCC	6x5.8x5	Left Kidney	1b	0	0	T1bN0M0	I	2	living	72	/	No	72
ccRCC_177	57	Male	25.2092	169	72	No	Yes	No	No	ccRCC	3x3x2	Left Kidney	1a	0	0	T1aN0M0	I	2	living	72	/	No	72
ccRCC_178	58	Male	25.2826	164	68	No	Yes	No	Yes	ccRCC	4.0x2.5x2.5	Left Kidney	1a	0	0	T1aN0M0	I	3	living	72	/	No	72
ccRCC_179	56	Female	25.8478	161	67	Yes	No	No	Yes	ccRCC	2.5x2.5x2.0	Right Kidney	1a	0	0	T1aN0M0	I	3	living	72	/	No	72
ccRCC_180	61	Male	20.7612	170	60	No	No	No	Yes	ccRCC	5.0x4.2x4.0	Right Kidney	1b	0	0	T1bNM0	I	3	living	71	Head	Yes	43
ccRCC_181	66	Male	25.0995	167	70	Yes	No	No	Yes	ccRCC	4.0x3.5x3.0	Left Kidney	1a	0	0	T1aN0M0	I	4	living	71	Bones	Yes	6
ccRCC_182	66	Male	23.7387	168	67	Yes	No	No	No	ccRCC	4.0x3.5x3.5	Left Kidney	1a	0	0	T1aN0M0	I	3	living	70	/	No	70
ccRCC_183	43	Male	23.3355	163	62	No	No	No	No	ccRCC	6.5x5.4x4.5	Right Kidney	1b	0	0	T1bN0M0	I	4	living	70	/	No	70
ccRCC_184	73	Male	18.75	160	48	No	No	No	No	ccRCC	4x4x3	Right Kidney	3a	0	0	T3aN0M0	III	2	living	70	/	No	70
ccRCC_185	65	Male	22.5896	167	63	No	No	No	No	ccRCC	4.5x4x3	Right Kidney	1b	0	0	T1bN0M0	I	3	living	70	/	No	70
ccRCC_186	51	Female	19.7055	164	53	No	No	No	Yes	ccRCC	5.0x4.8x4.0	Left Kidney	1b	0	0	T1bN0M0	I	3	living	69	/	No	69
ccRCC_187	65	Female	19.5312	160	50	Yes	No	No	No	ccRCC	4x3x2.8	Left Kidney	1a	0	0	T1aN0M0	I	2	living	68	/	No	68
ccRCC_188	48	Male	27.102	175	83	No	No	No	No	ccRCC	3.5x3.2x1.5	Right Kidney	1a	0	0	T1aN0M0	I	3	living	68	/	No	68
ccRCC_189	55	Male	28.3737	170	82	No	No	No	/	ccRCC	9.8×6.5×4.3	Right Kidney	2a	0	0	T2aN0M0	II	4	living	68	Waist muscle, Kidney	Yes	4
ccRCC_190	67	Female	20.0288	158	50	No	No	No	No	ccRCC	4.5x3x3	Left Kidney	1b	0	0	T1bN0M0	I	3	living	68	/	No	68
ccRCC_191	54	Female	22.719	157	56	Yes	No	No	Yes	ccRCC	4x3.5x2	Right Kidney	1a	0	0	T1aN0M0	I	3	living	67	/	No	67
ccRCC_192	64	Male	26.2346	180	85	Yes	Yes	No	No	ccRCC	4.5x4.0x3.8	Left Kidney	4	0	0	T4N0M0	IV	3	living	67	Kidney	Yes	17
ccRCC_193	35	Male	27.6361	168	78	Yes	No	No	No	ccRCC	7.5x6.5x6.0	Right Kidney	2a	0	0	T2aN0M0	II	3	living	67	/	No	67
ccRCC_194	53	Male	26.0617	173	78	Yes	No	No	No	ccRCC	3x2.2x1.5	Left Kidney	1a	0	0	T1aN0M0	I	1	living	67	/	No	67
ccRCC_195	43	Male	33.2031	160	85	Yes	Yes	No	No	ccRCC	7.0x5.0x3.0	Left Kidney	1b	0	0	T1bN0M0	I	4	living	66	/	No	66
ccRCC_196	63	Male	30.1038	170	87	Yes	No	No	No	ccRCC	5.5×5×3.5	Left Kidney	1b	0	0	T1bN0M0	I	2	living	66	/	No	66
ccRCC_197	67	Male	23.8751	165	65	Yes	No	No	No	ccRCC	5.5x4.6x4.2	Left Kidney	1b	0	0	T1bN0M0	I	3	living	65	/	No	65
ccRCC_198	76	Male	24.1633	175	74	Yes	No	No	Yes	ccRCC	4.5x3.3x1.5	Right Kidney	3b	0	0	T3N0M0	III	3	death	43	？	Yes	30
ccRCC_199	72	Male	30.1205	166	83	Yes	Yes	No	No	ccRCC	7x6x4.5	Right Kidney	3a	1	0	T3aN1M0	III	3	death	22	。	Yes	6
ccRCC_200	61	Female	23.8281	160	61	Yes	No	No	No	ccRCC	6×4.5×4	Left Kidney	1b	0	0	T1bN0M0	I	3	living	65	/	No	65
ccRCC_201	66	Female	24.4352	158	61	Yes	No	No	No	ccRCC	4.5x4x3.5	Right Kidney	1b	0	0	T1bN0M0	I	2	living	65	/	No	64
ccRCC_202	57	Male	21.7993	170	63	No	No	No	No	ccRCC	9x7x7.5	Left Kidney	2a	0	0	T2aN0M0	II	3	living	64	Kidney	Yes	27
ccRCC_203	62	Male	26.9896	170	78	No	No	No	No	ccRCC	4x3.7x3	Left Kidney	1a	0	0	T1aN0M0	I	2	living	64	/	No	64
ccRCC_204	45	Male	32.2421	168	91	No	No	No	No	ccRCC	6.0x4.0x4.5	Right Kidney	3b	0	0	T3bN0M0	III	3	living	64	/	No	64
ccRCC_205	41	Male	25.8264	176	80	Yes	No	No	No	ccRCC	4.5x4x3.5	Right Kidney	1b	0	0	T1bN0M0	I	3	living	63	/	No	63
ccRCC_206	52	Male	20.7612	170	60	No	No	No	Yes	ccRCC	5x3.5x3	Right Kidney	1b	0	0	T1bN0M0	I	2	living	63	/	No	63
ccRCC_207	50	Male	24.2587	177	76	No	No	No	No	ccRCC	Right Kidney: 8x5x3.5 ;Left Kidney: 2.4x1.8x1.6	Left Kideny(bilateral renal cell carcinoma)	2a	0	0	T2aN0M0	II	3	living	63	/	No	63
ccRCC_208	61	Female	19.9792	155	48	Yes	No	Yes	No	ccRCC	2.0x1.8x1.5	Left Kidney	1a	0	0	T1aN0M0	I	2	living	62	/	No	62
ccRCC_209	50	Male	22.4913	170	65	Yes	No	No	No	ccRCC	6x6x5	Left Kidney	1b	0	0	T1bN0M0	I	2	living	63	/	No	63
ccRCC_210	35	Male	24.4193	181	80	No	No	No	No	ccRCC	4x3x2	Right Kidney	1a	0	0	T1aN0M0	I	3	living	62	/	No	62
ccRCC_211	76	Male	22.2041	175	68	Yes	No	No	No	ccRCC	5x4.5x3.5	Right Kidney	1b	0	0	T1bN0M0	I	2	living	62	/	No	62
ccRCC_212	42	Male	18.8092	171	55	No	No	No	No	ccRCC	3x3x2.5	Left Kidney	1a	0	0	T1aN0M0	I	2	living	62	/	No	62
ccRCC_213	43	Female	20.7008	163	55	No	No	No	No	ccRCC	4.5×4.7×2.0	Left Kidney	1b	0	0	T1bN0M0	I	3	living	62	/	No	62
ccRCC_214	52	Male	26.5118	178	84	No	No	No	Yes	ccRCC	3.5x3.5x3	Left Kidney	1a	0	0	T1aN0M0	I	3	living	62	/	No	62
ccRCC_215	46	Male	25	160	64	No	No	No	Yes	ccRCC	4x4x3.5	Left Kidney	1a	0	0	T1aN0M0	I	3	living	61	/	No	61
ccRCC_216	69	Female	24.1415	155	58	Yes	No	No	No	ccRCC	4.5x3.5x2.5	Right Kidney	1b	0	0	T1bN0M0	I	2	living	61	/	No	61
ccRCC_217	54	Female	29.4758	153	69	No	No	No	No	ccRCC	4x3.2x2.2	Left Kidney	4	0	0	T4N0M0	IV	4	death	42	Kidney, Bones	Yes	2
ccRCC_218	51	Male	21.3578	169	61	Yes	No	Yes	No	ccRCC	4.6x4.0x3.8	Right Kidney	1b	0	0	T1bN0M0	I	2	living	61	/	No	61
ccRCC_219	82	Male	25.1486	162	66	No	No	No	No	ccRCC	3.8x3.5x3.0	Right Kidney	1a	0	0	T1aN0M0	I	4	living	61	/	No	61
ccRCC_220	44	Female	23.7118	163	63	No	No	No	No	ccRCC	9x7.5x6	Right Kidney	2a	0	0	T2aN0M0	II	2	living	60	/	No	60
ccRCC_221	57	Female	26.5625	160	68	Yes	No	No	No	ccRCC	5.5x4.0x3.5	Left Kidney	1b	0	0	T1bN0M0	I	2	living	60	/	No	60
ccRCC_222	39	Female	23.533	161	61	Yes	No	No	No	ccRCC	5x5x4	Right Kidney	1b	0	0	T1bN0M0	I	2	living	60	/	No	60
ccRCC_223	56	Female	/	/	/	No	No	No	/	ccRCC	8x7x5	Left Kidney	2a	0	0	T2aN0M0	II	2	living	60	/	No	60
ccRCC_224	55	Male	25.7117	165	70	No	No	No	No	ccRCC	4.0x3.8x2.6	Right Kidney	1a	0	0	T1aN0M0	I	3	living	59	Kidney, Parotid	Yes	34
ccRCC_225	70	Male	20.7612	170	60	No	No	No	No	ccRCC	6x5x3	Left Kidney	3b	0	0	T3bN0M0	III	3	living	59	/	No	59
ccRCC_226	65	Female	25.3906	160	65	No	No	No	No	ccRCC	6.5x6.5x4.5	Right Kidney	1b	0	0	T1bN0M0	I	3	living	59	/	No	59
ccRCC_227	60	Male	21.2031	171	62	No	No	No	No	ccRCC	6x4.5x4	Left Kidney	1b	1	0	T1bN1M0	III	3	living	59	Lymph nodes after the peritoneum	Yes	9
ccRCC_228	76	Male	24.2215	170	70	Yes	No	Yes	Yes	ccRCC	4.5x3.5x3.5 ;3x2.5x1.5	Right Kidney	2a	0	0	T2aN0M0	II	3	living	59	/	No	59
ccRCC_229	59	Male	26.8612	181	88	No	Yes	No	Yes	ccRCC	5.5x5.0x4.0	Left Kidney	1b	0	0	T1bN0M0	I	3	living	58	/	No	58
ccRCC_230	64	Female	19.5312	160	50	No	Yes	No	No	ccRCC	5.0x4.0x3.0	Left Kidney	1b	0	0	T1bN0M0	I	3	living	57	/	No	57
ccRCC_231	55	Male	29.3524	178	93	No	Yes	No	No	ccRCC	3.5x2.8x3	Left Kidney	1a	0	0	T1aN0M0	III	2	death	56	Liver, Back	Yes	19
ccRCC_232	69	Male	27.9155	165	76	Yes	No	No	No	ccRCC	7.5x6.0x5.5	Right Kidney	2a	0	0	T2aN0M0	II	3	death	43	Kidney, Bones	Yes	9

## Sheet: Statistics 
Clinicopathological characteristics of 232 ccRCC patients in FUSCC cohort
Characteristics		Mean (median)	Range
Age at surgery, year		55 (55.5)	17-84
tumor size, cm		5.5 (5.0)	1.8-14.0
Progression status	Recurrence	79 (34.1)
	Non-recurrence	153 (65.9)
Live status	Death	49 (21.1)
	Living	183 (78.9)
Gender, n (%)	Male	157 (67.7)
	Female	75 (32.3)
Clinical manifestation, n (%)	Incidental	160 (69.0)
	Symptomatic	72 (31.0)
Laterality, n (%)	Left	123 (53.0)
	Right	109 (47.0)
Hypertension, n (%)	Present	77 (33.2)
	Absent	155 (66.8)
Diabetes, n (%)	Present	25 (10.8)
	Absent	207 (89.2)
Cardiovascular and cerebrovascular diseases	Present	15 (6.5)
	Absent	217 (93.5)
pT stage, n (%)	T1	162 (69.8)
	T2	36 (15.5)
	T3	32 (13.8)
	T4	2 (0.9)
pN stage, n (%)	N0	219 (94.4)
	N1	13 (5.6)
pM stage, n (%)	M0	217 (93.5)
	M1	15 (6.5)
AJCC stage, n (%)	I	157 (67.7)
	II	30 (12.9)
	III	25 (10.8)
	IV	20 (8.6)
ISUP grade, n (%)	1	3 (1.3)
	2	81 (34.9)
	3	119 (51.3)
	4	29 (12.5)
ccRCC: clear cell renal cell carcinoma; FUSCC: Fudan University Shanghai Cancer Center; AJCC: the American Joint Committee on Cancer;ISUP: International Society of Urological Pathology

## Sheet: Abbreviations
Abbreviations	Full names
RCC	Renal cell carcinoma
ccRCC	clear cell renal cell carcinoma
NNMT	Nicotinamide N-methyltransferase
DNA-PKcs	DNA-dependent protein kinase catalytic subunit
AA	aristolochic acid
TCGA	The Cancer Genome Atlas
CPTAC	Clinical Proteomic Tumor Analysis Consortium
ECM	extracellular matrix
WES	whole exome sequencing
TNM	tumor node metastasis
ISUP	International Society of Urological Pathology
COSMIC	Catalog of Somatic Mutations in Cancer
SBS	Single Base Substitution
CNA	copy number alteration
iBAQ	intensity-based absolute quantification
FOT	fraction of total
SCNA	somatic copy number alteration
HR	hazard ratio
CI	confidence interval
H-3PLB	high 3p loss burden
L-3PLB	low 3p loss burden
TSG	tumor suppressor gene
OS	overall survival
WT	wild type
FC	fold change
GSEA	Gene Set Enrichment Analysis
DEP	differentially expressed protein
PCA	principle component analysis
OXPHOS	oxidative phosphorylation
TME	tumor microenvironment
OxPPP	oxidative pentose phosphate pathway
APM	antigen-presenting machinery
TCR	T cell receptor
Hcy	homocysteine
IHC	immunohistochemistry
SAH	S-adenosyl homocysteine
NAM	nicotinamide
1MNA	1-methylenicotinamide
K-Hcy	lysine-homocysteinylation
NAC	N-acetyl-cysteine
