# Supplementary material for: A Proteogenomic Atlas of Clear Cell Renal Cell Carcinoma in a Chinese Population
Source: Research Square preprint supplement (doi:10.21203/rs.3.rs-221123/v1), 2021-02-26
Supplement: Supplementary file 8 [file 049808fae981c424972c3855.xlsx]

## Sheet: Description
Table S4: Differentially expressed proteins in whole cohort; Related to Figures 3, S5.
Expressed proteins	Proteins for tumor/tumor adjacent differential analysis
Upregulated pathways	Tumor upregulated pathways
Downregulated pathways	Tumor downregulated pathways
Kidney specific proteins	Expression of 17 HPA-annotated kidney specific proteins in ccRCC tumor and adjacent tissues.

## Sheet: Expressed proteins
Gene Symbol	mean of Tumor	mean of Tumor adjacent	p value	BH adjusted p value	FC (T/TA)	None-missing value in Tumor	None-missing value in tumor-adjacent
PRODH	1.3214	0.770652	0.254816	1	1.71466	210	231
ARHGEF11	0.0222828	0.0131891	0.000790303	1	1.68949	172	186
NFKBIE	0.0719321	0.00813897	0.0170156	1	8.83799	138	48
MAN2C1	0.33222	0.252463	0.00200531	1	1.31592	227	232
GSK3B	0.0730981	0.0662893	0.484702	1	1.10271	197	211
FAM3C	1.19438	1.53483	3.22e-05	0.407813	0.778185	231	232
SIRPA	0.251285	0.030294	1.6e-15	2.32976e-11	8.29487	182	91
RILPL1	0.122379	0.0470759	0.0421132	1	2.5996	189	180
STEAP3	0.239454	0.115594	0.00358765	1	2.07151	134	178
ACTR2	27.3199	18.3572	6.36e-10	8.86775e-06	1.48824	232	232
GOLGB1	0.379987	0.45829	0.0591018	1	0.82914	227	232
ITGB4	0.589879	0.28909	9.01e-09	0.0001235	2.04047	225	232
EXOC4	0.386912	0.380636	0.8439	1	1.01649	228	232
PLOD1	0.967588	0.274073	7.66e-13	1.09737e-08	3.5304	232	231
RPL23A	16.3371	11.6424	6.75e-06	0.0873788	1.40324	231	232
RPA3	2.26187	1.47714	3.35e-08	0.000455332	1.53125	228	232
OSTM1	0.118705	0.0849222	0.00696496	1	1.39781	170	166
HLA-DMA	0.577343	0.105285	1.29e-33	1.9697e-29	5.4836	220	139
CD109	0.426623	0.191969	3.21e-05	0.406643	2.22235	229	232
MRPL22	0.576971	1.30667	1.81e-09	2.50812e-05	0.441558	210	231
FKBP1A	19.4423	14.7003	9e-06	0.116163	1.32258	231	232
TMEM167A	1.3141	0.898413	0.000783413	1	1.46269	196	196
TIMM50	1.0491	2.4163	3.18e-33	4.853e-29	0.434176	224	231
LSM4	0.467192	0.668399	0.072226	1	0.698972	158	146
HNRNPUL2	4.84859	3.46553	5.62e-09	7.72638e-05	1.39909	231	232
LYZ	6.52775	44.1546	4.95e-22	7.40075e-18	0.147838	232	232
UTP14A	0.106953	0.0281598	0.0092503	1	3.79809	144	95
LGALS3BP	2.66833	3.07471	0.226291	1	0.867833	232	232
TSR1	0.482428	0.181774	2.23e-11	3.15657e-07	2.654	210	152
SETD3	0.311001	0.735732	3.72e-24	5.58967e-20	0.422709	225	232
ACSF2	1.26592	31.0184	4.3e-66	6.75874e-62	0.0408119	203	232
PDZK1	4.22133	36.8096	2.35e-64	3.69114e-60	0.11468	219	232
ACTN4	56.111	113.18	1.35e-39	2.07684e-35	0.495768	231	232
IFT74	1.69083	2.60749	0.0538413	1	0.648451	138	168
HNF1B	0.067077	0.196503	4.37e-12	6.22769e-08	0.341353	166	202
PRKACA	0.95178	1.52346	1.2e-16	1.75692e-12	0.624748	230	232
EPS8	1.00164	0.955719	0.602176	1	1.04805	226	232
PHLDB1	0.115453	0.122535	0.823206	1	0.942205	215	225
PRSS3	0.737762	1.16489	0.0687143	1	0.633331	197	186
USP7	1.01241	0.94584	0.536217	1	1.07039	232	232
AKAP13	0.0458224	0.0225313	0.00518641	1	2.03372	212	215
CCBL2	0.21484	0.495127	2.33e-11	3.29765e-07	0.433909	194	227
TSPAN1	4.64188	3.74287	0.815502	1	1.24019	152	230
EEFSEC	0.835774	0.854049	0.843098	1	0.978602	226	232
NUP54	1.42046	0.664596	0.0552887	1	2.13732	226	231
UBE2K	3.57233	3.2873	0.36025	1	1.08671	227	232
NENF	1.32783	2.10416	0.000138686	1	0.631051	216	232
SOD1	58.7676	180.025	1.73e-38	2.65745e-34	0.326442	232	232
ERP29	7.68825	16.5688	1.9e-22	2.84297e-18	0.46402	231	232
RPLP0	20.253	15.9625	0.000101433	1	1.26878	232	232
IMMT	5.7459	15.6544	2.98e-44	4.60321e-40	0.367047	231	232
GPNMB	2.12523	0.0989637	0.0371779	1	21.4749	171	105
UGGT2	0.033396	0.0151753	0.0334404	1	2.20068	155	155
NAPRT1	1.81869	3.90884	2.94e-18	4.33973e-14	0.465276	230	232
DNM1L	0.761952	1.26201	2.21e-17	3.24848e-13	0.603763	231	232
ITGAM	0.727816	0.0564921	3.96e-05	0.49991	12.8835	230	185
TOMM22	3.07157	6.43412	6.71e-18	9.88718e-14	0.477388	229	232
VPS13C	0.238634	0.404935	1.02e-10	1.43494e-06	0.589315	230	232
GTF3C1	0.0672173	0.0670441	0.988802	1	1.00258	200	208
CTH	0.188505	1.59658	3.8e-58	5.94624e-54	0.118068	153	231
TTC37	0.356228	0.332672	0.45103	1	1.07081	227	232
SH3GLB1	1.78707	0.589966	1.53e-07	0.00205525	3.02911	226	227
GPLD1	0.0862507	0.0158309	3.14e-08	0.00042704	5.44827	185	96
POGZ	0.0319565	0.0196998	0.004738	1	1.62217	182	156
VPS52	0.211714	0.259019	0.0837662	1	0.817368	217	232
GALC	0.239791	0.552845	2.19e-05	0.279137	0.43374	173	218
DNMT1	0.0194277	0.00488862	3.01e-09	4.1532e-05	3.97407	169	76
GART	1.45824	1.0636	0.000956349	1	1.37105	232	232
MRPL41	0.171802	0.303777	0.00260723	1	0.565554	115	178
STT3B	0.802606	0.677447	0.113407	1	1.18475	231	232
SART1	0.273111	0.190264	0.0050571	1	1.43544	220	223
ATP5D	5.81845	28.1381	2.87e-19	4.25277e-15	0.206782	219	232
PPBP	0.518979	0.663318	0.406675	1	0.782398	123	173
DEPTOR	0.200716	0.349327	2.65e-08	0.000360877	0.574579	213	232
SIRT3	0.367915	0.815747	7.85e-10	1.09343e-05	0.451016	185	230
BID	0.272138	0.159542	0.00197469	1	1.70574	189	142
KEAP1	0.0127799	0.0100809	0.492786	1	1.26774	129	116
ITPR1	0.211203	0.2042	0.78696	1	1.03429	225	232
ATP6V1H	1.0803	6.18614	2.77e-61	4.34336e-57	0.174632	232	232
MRVI1	0.0449964	0.035686	0.22156	1	1.2609	176	146
SF3A2	0.700689	0.607906	0.0928158	1	1.15263	215	219
PRKD2	0.113566	0.0432084	3.66e-14	5.28101e-10	2.62834	215	178
SCARB2	2.41106	1.69695	1.12e-06	0.0147571	1.42082	231	232
NIPSNAP1	7.77374	22.4844	3.3e-30	5.01501e-26	0.345739	232	232
CTGF	0.304114	0.229797	0.496766	1	1.3234	108	163
ND3	0.647196	4.13241	6.54e-47	1.01344e-42	0.156615	164	211
IDNK	0.207645	1.10822	3.14e-46	4.86198e-42	0.187368	162	228
PSMA2	3.89364	3.95782	0.793893	1	0.983785	232	232
HIST1H1C	75.9075	54.8217	0.000663352	1	1.38463	231	232
LMCD1	0.478737	0.884184	2.39e-08	0.000325709	0.541445	219	231
UBAP2L	0.232215	0.139692	6.59e-05	0.824541	1.66234	220	227
PSPH	0.929766	1.92084	4.53e-17	6.64642e-13	0.484042	214	231
HNRNPA3	37.0809	25.3355	5.29e-10	7.3859e-06	1.4636	232	232
LPIN2	0.0256098	0.0982651	8.39e-09	0.000115052	0.26062	154	211
TGM2	100.32	10.08	1.23e-18	1.81855e-14	9.9524	232	232
YLPM1	0.094149	0.0619194	0.00550182	1	1.52051	206	221
SPATA5L1	0.0742578	0.0513689	0.436213	1	1.44558	160	194
RGS19	0.089017	0.00514082	6.65e-12	9.46627e-08	17.3157	158	15
FAM136A	0.255838	0.850644	5.27e-14	7.59618e-10	0.300758	157	216
PAK4	0.209347	0.214916	0.903234	1	0.974088	177	219
CAPZA2	17.9626	25.2	1.22e-10	1.71459e-06	0.712801	232	232
NSUN2	0.530944	0.298078	9.87e-06	0.127224	1.78122	225	232
ANKZF1	0.0781532	0.00382	1.27e-07	0.00170967	20.459	147	38
OSBPL9	0.237737	0.312206	0.0176676	1	0.761474	222	232
PRPF38A	1.12592	1.10921	0.945295	1	1.01506	222	227
JUP	1.29529	1.97439	1.36e-14	1.96738e-10	0.656048	229	232
ABCE1	0.803575	0.698187	0.0440366	1	1.15094	229	232
DES	31.1104	9.51653	0.000326532	1	3.26909	212	224
IPO5	1.44478	1.82136	0.005439	1	0.793246	231	232
LGALS9	0.152629	0.00698935	1.73e-17	2.54448e-13	21.8374	136	9
SF3A1	1.08654	1.10454	0.787193	1	0.983699	229	232
RPS2	4.56716	4.16054	0.149582	1	1.09773	232	232
EXOSC2	0.409459	0.383043	0.414493	1	1.06896	219	232
ACTL6A	1.17248	0.891014	0.00483435	1	1.3159	226	232
AFTPH	0.113441	0.18403	0.00181438	1	0.616424	168	220
RPRD1A	0.289076	0.241657	0.0796241	1	1.19623	208	229
CYB5R2	0.0196738	0.0299297	0.350546	1	0.657333	50	153
IAH1	1.55842	1.02272	4.16e-08	0.000564845	1.5238	227	232
SNRPG	5.38115	6.15151	0.0357764	1	0.874769	225	229
EIF2AK2	0.982395	0.744887	0.000100258	1	1.31885	229	232
CPQ	0.553693	4.69974	4.33e-51	6.73402e-47	0.117814	224	232
TMEM109	9.6741	6.42632	3.53e-05	0.446721	1.50539	231	232
MRPL15	0.376034	0.650653	0.00102697	1	0.577933	198	232
NEXN	0.23349	0.343166	0.0236235	1	0.680402	193	228
EIF2B1	0.969914	0.794188	0.0885383	1	1.22127	228	232
MTFP1	3.14665	2.10455	0.000720777	1	1.49517	221	231
LRRC59	3.21091	3.19203	0.951647	1	1.00592	230	232
DNAJB11	2.37355	3.21453	0.0043146	1	0.738383	232	232
RPSA	20.2355	15.3295	1.81e-05	0.231372	1.32003	231	232
ATP6V1C1	3.33805	8.08318	1.93e-18	2.851e-14	0.412962	232	232
MDH2	119.418	349.452	1.61e-47	2.49647e-43	0.341731	232	232
GTF2A1	0.206724	0.45297	5.64e-10	7.87175e-06	0.456375	201	211
FABP5	10.3697	3.10726	0.0359857	1	3.33725	226	223
NCALD	2.4668	1.31962	2.8e-09	3.86568e-05	1.86933	225	231
RNF213	0.421202	0.135752	3.52e-21	5.24938e-17	3.10274	230	232
PKM	675.406	165.424	1.86e-43	2.87091e-39	4.08287	232	232
RAVER1	0.200028	0.106218	4.76e-07	0.00633366	1.88318	209	218
RBM5	0.0566595	0.023682	0.000143853	1	2.39251	151	119
PARP1	3.87797	2.93068	3.34e-05	0.422911	1.32323	231	232
PABPC4	0.862089	0.759556	0.0899001	1	1.13499	226	232
ACP1	5.49529	5.42616	0.798155	1	1.01274	232	232
LPCAT2	0.206905	0.127856	0.000833366	1	1.61827	218	222
BAD	0.168061	0.301729	7.77e-10	1.08252e-05	0.556993	187	229
PDCD10	0.893607	1.41442	7.24e-09	9.9369e-05	0.631782	225	232
KIAA1191	0.392693	0.394169	0.987523	1	0.996256	154	164
IFIT1	0.478172	0.265524	1.62e-05	0.207409	1.80086	219	227
NDUFA11	0.818976	8.30333	3.36e-67	5.28427e-63	0.0986322	206	232
EXOC1	0.345689	0.47438	0.000786685	1	0.728717	220	232
HAAO	2.87747	6.44812	1.13e-28	1.71274e-24	0.446249	230	232
TES	1.60859	0.694531	3.16e-18	4.66353e-14	2.31608	231	232
ANP32E	4.92638	5.49218	0.0897989	1	0.896981	232	232
MYO5A	0.149439	0.120375	0.208194	1	1.24144	218	199
GRB2	2.43258	2.02699	0.00170907	1	1.2001	231	232
KPNB1	4.47936	1.94847	1.41e-07	0.00189518	2.29891	232	232
CTR9	0.149372	0.084783	5.56e-05	0.697891	1.76182	211	226
NDUFAB1	6.31762	35.6468	9.13e-43	1.40849e-38	0.177228	229	232
APOOL	1.59425	3.19702	8.19e-20	1.21613e-15	0.498668	228	232
IGF2BP2	0.0447834	0.134159	2.28e-08	0.000310787	0.333809	57	210
THUMPD3	0.0435502	0.0490366	0.484183	1	0.888117	178	204
CYTB	0.697044	3.7568	6.17e-36	9.44935e-32	0.185542	210	229
SDSL	0.509474	1.99173	9.09e-12	1.29242e-07	0.255795	187	232
PRKCDBP	1.59361	0.448163	1.65e-20	2.45668e-16	3.55588	225	212
PCYOX1	4.9351	14.9154	1.88e-46	2.91212e-42	0.330873	232	232
PLTP	1.14791	0.232497	0.0292506	1	4.93731	191	157
RBM39	1.06406	1.20613	0.445713	1	0.882211	230	232
PALD1	0.122941	0.0386186	1.07e-06	0.0141101	3.18347	203	151
RABGEF1	0.695831	0.632049	0.587254	1	1.10091	209	216
IMPA1	1.57571	1.58483	0.957822	1	0.994245	225	232
EVL	0.720413	0.093824	3.24e-12	4.62283e-08	7.67834	220	95
MAPK1IP1L	0.353944	0.435513	0.0118874	1	0.812706	200	207
ICAM3	0.228398	0.00545815	7.43e-07	0.00984252	41.8453	180	23
GNG5	2.05445	1.23594	7.45e-05	0.930356	1.66226	210	173
TP53I3	1.30317	2.04331	0.000114216	1	0.637775	226	232
MLYCD	2.2705	3.28856	0.00518375	1	0.690422	226	232
GBP4	0.348378	0.0108375	2.22e-11	3.14263e-07	32.1455	178	51
PET112	0.149257	0.235202	0.0216929	1	0.634592	139	222
COQ10B	0.283922	0.50733	0.194197	1	0.559639	133	228
MAP3K7	0.0128638	0.0163517	0.111329	1	0.786691	123	152
ITGAV	1.28903	1.06956	0.00538745	1	1.2052	231	232
ITIH1	34.5468	5.25036	1.39e-13	2.00021e-09	6.57989	232	232
ALG5	1.16192	1.12766	0.804821	1	1.03038	223	219
ND4	0.270735	1.72922	8.06e-57	1.26034e-52	0.156565	207	231
PIGR	0.374593	2.12745	2.69e-08	0.00036627	0.176076	118	230
ANAPC5	0.0337789	0.00644116	0.104586	1	5.24423	141	87
TPT1	12.2832	9.50502	0.00157161	1	1.29228	231	232
SORD	5.67256	51.6397	3.74e-43	5.77119e-39	0.109849	231	232
CCDC47	1.34071	1.26281	0.795562	1	1.06169	230	232
ALYREF	1.10982	0.809916	0.00169511	1	1.37029	223	230
ECI1	10.2311	42.6908	1.85e-54	2.88563e-50	0.239655	231	232
OCIAD1	2.13531	4.40481	8.14e-23	1.21921e-18	0.484768	228	232
RAB1B	8.81857	8.86682	0.931438	1	0.994558	231	232
PLIN2	15.0577	0.841777	2.09e-14	3.01963e-10	17.888	224	121
TRAM1	1.4507	0.439336	1.15e-16	1.68383e-12	3.30204	224	214
ZNF207	2.43393	2.0358	0.221217	1	1.19557	206	205
RPS27A	25.5038	21.9945	0.109093	1	1.15955	215	215
SLC16A3	0.824403	0.0391085	6.3e-16	9.19989e-12	21.0799	225	144
UBAC1	0.0804433	0.167393	0.000521182	1	0.480565	207	227
AKT1S1	0.275501	0.271643	0.943671	1	1.0142	168	133
BTD	0.10955	0.350826	4.23e-23	6.34119e-19	0.312264	213	232
PPM1G	0.414212	0.364119	0.562283	1	1.13757	203	222
SSRP1	0.975155	0.942205	0.864355	1	1.03497	229	232
PGD	2.82574	4.14116	0.000201319	1	0.682354	232	232
GIMAP4	0.878059	0.323921	6.06e-10	8.45491e-06	2.71072	223	213
LZTFL1	1.51632	2.3483	0.00409382	1	0.645708	218	231
C8G	2.70926	2.43176	0.513069	1	1.11412	230	232
HNRNPR	5.9969	5.42385	0.0615279	1	1.10565	231	232
PDIA4	11.2891	7.33363	0.000120278	1	1.53936	231	232
RPS12	26.7124	17.7162	2.05e-08	0.000279702	1.5078	231	232
ACSM2A	10.1837	132.466	1.71e-46	2.64913e-42	0.0768779	192	230
CLTB	3.96438	2.93809	0.494797	1	1.34931	194	206
OCRL	0.0921743	0.0663419	0.0086292	1	1.38938	209	221
EPN1	0.284291	0.336648	0.00924168	1	0.844475	219	228
SLC25A1	9.54997	15.7778	1.37e-08	0.000187347	0.60528	231	232
VAMP5	1.90004	0.48051	1.13e-14	1.63647e-10	3.95421	173	103
ATP6V1A	4.9232	23.2514	1.34e-51	2.08531e-47	0.211737	232	232
PF4	0.862823	1.1174	0.0275823	1	0.77217	179	189
RAD21	0.391322	0.398194	0.889484	1	0.982742	228	228
SRRM1	0.149943	0.161195	0.392621	1	0.930198	218	226
SULT1C2	0.968233	2.61364	2.41e-08	0.000328411	0.370453	184	231
ALDH1A1	201.871	115.601	1.35e-07	0.00181629	1.74627	232	232
VIL1	1.10374	12.0023	3.07e-66	4.82573e-62	0.0919609	182	231
WDR77	0.994098	1.34166	9.94e-06	0.128087	0.740945	229	232
MRPS5	0.103584	0.271489	3.1e-19	4.59234e-15	0.381541	164	228
VKORC1L1	0.587594	0.229513	3.14e-07	0.00419441	2.56017	211	194
GLYATL1	1.26291	21.4583	5.4e-45	8.3484e-41	0.0588542	203	230
RAB3D	0.727561	0.0562837	0.0561726	1	12.9267	214	130
SRP14	5.65633	5.11675	0.21061	1	1.10545	230	232
MOGS	2.9108	2.00027	0.000128326	1	1.45521	232	232
CHCHD1	0.52559	1.97649	6.73e-19	9.95771e-15	0.26592	150	208
YES1	0.279597	0.388376	0.00160654	1	0.719912	204	231
IL1RAP	0.0286896	0.00259539	1.66e-05	0.212463	11.0541	133	29
ATG16L1	0.0937792	0.050218	1.96e-05	0.250135	1.86744	175	184
AGO2	0.441345	0.230536	8.15e-15	1.18134e-10	1.91443	232	231
VAC14	0.440588	0.560051	0.0492726	1	0.786692	228	232
GSTP1	184.36	172.442	0.519761	1	1.06911	232	232
EBNA1BP2	0.193943	0.0302531	5.91e-24	8.87623e-20	6.4107	207	131
RPL7	3.20157	1.14777	8.68e-15	1.25791e-10	2.78939	230	229
CSNK2A2	0.789822	0.632801	0.00115043	1	1.24814	228	232
MRPL10	0.433871	0.763425	0.00510185	1	0.568322	178	223
DDB2	0.493757	0.0358575	1.98e-18	2.92446e-14	13.77	207	78
WDR75	0.0626054	0.0232845	5.9e-09	8.10778e-05	2.68871	197	131
P4HA1	2.26368	0.861761	1.66e-14	2.3992e-10	2.62681	232	229
C8B	0.879498	0.67488	0.263266	1	1.30319	228	232
WDR74	0.079778	0.0220682	0.0181047	1	3.61506	132	29
DNPEP	2.33007	1.99646	0.00821732	1	1.1671	231	232
CIRH1A	0.0845934	0.0129935	1.01e-07	0.00136209	6.51044	175	93
SDF4	0.223941	0.298353	0.0278303	1	0.75059	200	228
RPS26	1.60858	0.674774	5.18e-07	0.00688733	2.38388	193	124
CHCHD3	3.37748	7.93169	2.17e-07	0.00290671	0.425821	228	232
AGMAT	4.00693	99.5435	8.49e-54	1.32351e-49	0.0402531	216	232
RPL38	12.2146	7.5764	2.66e-05	0.338033	1.61219	230	231
C17orf49	1.34187	0.678857	3.78e-19	5.59818e-15	1.97666	229	231
TOR4A	0.182187	0.0151652	0.00153135	1	12.0135	186	50
ATP1B3	1.10386	0.886573	0.00454	1	1.24509	228	232
RNASEH2A	0.443146	0.0691902	3.97e-05	0.501014	6.40475	118	69
ND5	0.363286	2.58179	4.5e-52	7.00515e-48	0.140711	218	230
NBAS	0.291075	0.352419	0.0177739	1	0.825933	225	232
A2M	13.1247	7.1869	2.36e-11	3.33964e-07	1.8262	232	232
NDUFB6	0.711638	8.34698	4.7e-29	7.12896e-25	0.085257	221	230
NOTCH3	0.0616904	0.0130881	3.12e-07	0.00416832	4.71347	184	138
PLOD2	4.00695	0.188554	1.55e-13	2.22968e-09	21.251	224	73
MROH1	0.0471021	0.0555388	0.545289	1	0.848093	144	162
DDRGK1	0.80158	1.16472	1.81e-05	0.231372	0.688218	228	232
DNAJB12	0.0824953	0.190316	8.98e-10	1.24957e-05	0.433465	172	223
BRK1	1.22536	1.04522	0.13252	1	1.17235	210	224
ESYT2	1.22108	0.758522	0.000219697	1	1.60982	230	232
COX2	29.1857	216.297	9e-60	1.40949e-55	0.134933	232	232
SDCBP	0.592359	0.541369	0.665046	1	1.09419	220	222
TRAPPC9	0.063202	0.189921	0.000781724	1	0.332781	206	230
TNS3	0.339805	0.583794	2.61e-08	0.000355508	0.582064	228	232
BROX	0.244477	0.14902	0.001329	1	1.64056	214	213
C1S	0.989368	0.733606	0.0249212	1	1.34864	232	232
TPK1	1.56716	0.694409	0.00582769	1	2.25683	187	185
NUP133	0.32426	0.240781	0.000816401	1	1.3467	229	232
F10	0.698864	0.423335	0.114891	1	1.65085	210	201
CERS2	1.66395	1.40865	0.0604603	1	1.18123	228	230
ANXA7	5.85139	8.22456	1.35e-09	1.87461e-05	0.711453	232	232
PGPEP1	0.21106	0.723441	2.41e-39	3.70706e-35	0.291745	203	231
EMC6	0.658048	0.961421	0.000308911	1	0.684453	175	207
IGJ	3.07532	4.16532	0.395123	1	0.738315	229	227
AGPAT1	0.234014	0.397755	5.57e-08	0.000754456	0.588337	205	221
DMXL2	0.0167049	0.0484689	0.0159972	1	0.344651	109	164
DPYSL3	2.67959	1.75638	0.00115769	1	1.52563	231	231
AIF1	5.31603	2.51862	0.000159201	1	2.11069	228	227
GGA3	0.0386346	0.0495731	0.382662	1	0.779346	150	157
AKAP9	0.0942392	0.171657	2e-05	0.25514	0.548997	223	231
TAP1	1.5341	0.143739	2.15e-28	3.25682e-24	10.6728	230	226
MRPL33	0.0984375	0.280304	8.93e-06	0.115268	0.351182	72	168
ARAF	0.663602	0.398582	0.00523484	1	1.6649	222	230
MIOS	0.180507	0.134616	0.0340881	1	1.34091	219	232
CLPB	6.48055	8.13628	0.361119	1	0.796501	224	232
CDS2	0.302512	0.257857	0.283945	1	1.17318	219	227
CLIC1	39.8222	21.8945	2.55e-09	3.5241e-05	1.81883	232	232
AP2B1	3.50311	4.96937	6.83e-15	9.90623e-11	0.70494	232	232
SETD7	0.139891	0.0446832	2.72e-09	3.75659e-05	3.13074	200	171
MAP2K2	0.167964	0.118873	0.0454675	1	1.41297	207	210
ACSL4	0.671465	0.980477	9.46e-05	1	0.684835	227	232
NDUFB7	0.63628	6.7002	3.71e-65	5.82915e-61	0.0949643	197	232
PLXND1	0.0835665	0.0191519	3.22e-19	4.76946e-15	4.36336	220	159
COL1A1	88.5046	30.7563	3.74e-16	5.46526e-12	2.87761	232	232
THNSL1	0.235355	0.9202	2.97e-31	4.52034e-27	0.255765	211	232
PRDX1	192.728	260.957	2.64e-09	3.64742e-05	0.738542	232	232
DIMT1	0.215962	0.0971767	3.71e-05	0.468981	2.22236	180	162
CAPG	10.6002	4.2195	4.41e-10	6.16562e-06	2.51218	232	232
CLN5	0.146438	0.143894	0.906091	1	1.01768	203	219
MID1	0.334031	0.0402514	7.02e-11	9.89329e-07	8.29861	173	79
GMPS	0.792793	0.450889	8.89e-09	0.000121873	1.75829	226	232
EXOSC4	0.190001	0.149168	0.0085715	1	1.27374	201	205
DCAF8	1.1894	1.39237	0.304745	1	0.854226	204	230
ARCN1	4.18998	4.43672	0.329817	1	0.944386	232	232
VAMP7	0.415965	0.371312	0.303445	1	1.12026	220	225
ENOSF1	0.479543	2.1257	6.66e-35	1.01871e-30	0.225594	198	229
ARHGEF12	0.208587	0.274135	0.00591738	1	0.760893	225	232
HN1L	0.607388	1.10255	0.0128394	1	0.550893	193	162
WARS	7.29563	3.6037	1.72e-08	0.0002349	2.02448	231	232
WDR48	0.0579531	0.0823106	0.0176214	1	0.704079	160	217
TMX2	0.197635	0.322164	1.69e-06	0.0221948	0.613462	205	230
CPNE1	2.15552	1.38046	5.74e-09	7.88963e-05	1.56145	230	229
CD99L2	0.138499	0.607768	0.0446008	1	0.227881	180	210
KRAS	0.543833	1.50022	4.16e-34	6.35814e-30	0.362502	188	225
ACSS1	0.684596	3.01393	1.6e-38	2.45792e-34	0.227144	217	232
EIF2B4	0.375097	0.355149	0.695724	1	1.05617	219	226
GPAA1	0.22411	0.132193	0.00363471	1	1.69532	206	213
AHCY	5.42023	16.8594	1.52e-45	2.35159e-41	0.321496	232	232
IPO4	0.191283	0.142746	0.0161693	1	1.34002	220	231
ELOVL1	0.121483	0.0643029	0.000631835	1	1.88923	124	94
BLVRB	28.6848	37.0693	0.000172015	1	0.773815	232	232
NBEAL2	0.0210737	0.00558578	0.0106228	1	3.77274	142	72
NUDT14	0.325635	0.201639	0.000301425	1	1.61495	189	207
NECAP2	1.75543	1.1971	0.00121408	1	1.46641	229	232
BAZ1B	0.162372	0.0870668	0.000138505	1	1.86491	221	222
ABCA1	0.0265898	0.00688302	0.0351473	1	3.86311	138	16
HBB	14273.5	13360.2	0.0786075	1	1.06836	232	232
YARS	1.25788	1.14541	0.147623	1	1.09819	232	232
NAGA	0.463023	1.14435	1.14e-19	1.69187e-15	0.404616	225	232
ITIH5	1.04615	2.07754	0.0453235	1	0.503554	216	232
RAPH1	0.0331125	0.0649086	0.051356	1	0.510141	171	202
AFG3L2	1.8104	4.11579	1.23e-28	1.86394e-24	0.439866	231	232
PRDX2	125.595	164.631	1.67e-11	2.36789e-07	0.762888	232	232
RSF1	0.0343293	0.0687412	0.000361614	1	0.499399	172	176
WAPAL	0.0213053	0.00789241	2e-06	0.026228	2.69946	170	128
SLK	0.464564	0.53315	0.114549	1	0.871358	227	232
PCK1	0.923969	20.4527	3.13e-58	4.89814e-54	0.0451759	152	228
NDUFA5	7.47332	88.6608	7.43e-67	1.16829e-62	0.0842911	231	232
PRPF8	1.18583	0.762531	6.88e-11	9.69667e-07	1.55512	231	232
HINT3	0.725444	1.136	3.51e-05	0.444261	0.638598	222	227
RBMXL1	1.21333	1.08158	0.181918	1	1.12181	189	208
CAMK1	0.518793	0.287262	1.97e-08	0.000268866	1.80599	221	230
SAMD4B	0.0456207	0.0130813	3.15e-06	0.0411201	3.48748	141	96
DNM2	2.72526	2.76617	0.815823	1	0.985211	232	232
RHEB	0.896198	2.16922	6.79e-17	9.95278e-13	0.413143	222	230
GMPR2	5.07933	12.8149	1.33e-07	0.00178965	0.39636	225	231
CYB5A	76.3128	218.878	2.06e-29	3.12687e-25	0.348654	230	232
RBP1	0.664243	2.41378	1.52e-40	2.34004e-36	0.275188	215	231
PLEKHA2	0.248802	0.0871732	9.05e-09	0.000124039	2.85411	219	213
LUM	267.124	123.571	4.92e-06	0.063901	2.1617	232	232
EIF4A3	3.59433	2.99385	0.0174973	1	1.20057	232	232
SNRPD2	5.13781	4.48004	0.0942931	1	1.14682	227	232
GNAQ	0.739034	0.985642	3.59e-06	0.0468064	0.7498	229	232
D2HGDH	0.148143	1.451	1.34e-53	2.08839e-49	0.102097	180	230
ADSSL1	7.79249	3.60866	5.46e-08	0.000739775	2.15939	214	231
HSPD1	105.696	378.742	4.5e-45	6.95745e-41	0.27907	231	232
ACSM2B	11.268	168.662	6.51e-52	1.01328e-47	0.0668085	197	229
LIMA1	0.630472	0.7353	0.0306758	1	0.857435	229	231
ZC3H4	0.0180071	0.00870603	2.02e-06	0.0264862	2.06834	158	152
C9	10.0188	11.0211	0.629915	1	0.909056	231	232
SART3	0.523179	0.385763	4.17e-06	0.0542726	1.35622	229	232
WDR18	0.149396	0.0834701	1.43e-05	0.183355	1.78982	199	176
DHX38	0.140116	0.0475481	1.11e-07	0.00149606	2.94684	213	197
F12	0.369918	0.287162	0.0118831	1	1.28819	224	225
ENPP2	0.101125	0.00312228	1.13e-07	0.00152268	32.388	143	15
CIAO1	0.338952	0.327473	0.831366	1	1.03506	221	227
RENBP	0.552874	2.08872	1.05e-38	1.61322e-34	0.264696	224	232
LLGL1	0.0379891	0.0406424	0.709291	1	0.934715	186	189
TGFB1	0.368418	0.0565034	0.00800347	1	6.52029	194	83
RPL10A	8.38976	12.246	2.25e-08	0.000306742	0.685103	231	232
APOC2	1.19957	1.25555	0.688207	1	0.955416	193	200
MIF4GD	0.144378	0.0750994	0.000692164	1	1.92249	154	146
NCK2	0.544714	0.269207	0.000562444	1	2.0234	224	231
UBLCP1	0.431149	0.394883	0.412705	1	1.09184	216	231
PNKP	0.376017	0.403676	0.590353	1	0.931484	208	223
CAPS	0.115204	1.27944	9.65e-34	1.47384e-29	0.0900422	35	228
OSBPL5	0.013363	0.00499207	0.00527532	1	2.67684	141	116
C5	1.33613	1.2632	0.793727	1	1.05774	232	232
LYRM5	0.222567	1.57352	1.95e-10	2.73682e-06	0.141445	63	161
RAB27B	0.430233	0.0530835	0.054764	1	8.10483	128	55
EFTUD2	1.85544	1.20123	2.78e-09	3.8389e-05	1.54462	231	232
RARS	4.18354	3.02819	0.000309879	1	1.38153	232	232
AAMDC	0.462089	0.42075	0.421399	1	1.09825	171	177
PPTC7	0.110895	0.101642	0.827606	1	1.09104	89	189
RNPS1	1.65723	1.35686	0.00359908	1	1.22137	229	232
FTSJD2	0.122221	0.309142	0.000987179	1	0.395356	213	229
MCM6	0.235924	0.0299391	2.15e-20	3.20006e-16	7.88012	207	74
PNP	14.5078	66.0104	9.71e-61	1.52214e-56	0.219781	232	232
ECSIT	0.328763	0.595502	2.94e-08	0.000400046	0.552078	147	223
HIBCH	3.30574	35.7204	1.5e-64	2.3562e-60	0.0925449	230	232
HSPA14	0.0615697	0.0487593	0.036903	1	1.26273	196	216
CNOT10	0.0565507	0.0423697	0.0127989	1	1.3347	196	196
CSRP1	19.9441	24.4616	0.37112	1	0.815325	231	232
RFC5	0.0813619	0.0478423	0.053022	1	1.70062	197	180
SEC11C	0.773739	0.537884	0.15261	1	1.43849	215	219
ITPRIP	0.192387	0.00250965	0.000642382	1	76.6589	176	38
EXOC7	0.497312	0.480592	0.767374	1	1.03479	223	231
H1FX	1.03461	0.668485	1.33e-05	0.170692	1.5477	225	215
CDC23	0.168224	0.123477	0.029757	1	1.36239	210	220
LRMP	0.0370347	0.0642692	0.0143362	1	0.576244	146	167
RAP1GDS1	0.450884	0.576732	0.159849	1	0.781791	226	232
CCDC58	2.44002	5.09349	6.6e-19	9.76602e-15	0.479047	223	232
AUH	1.32037	9.41408	2.14e-77	3.37178e-73	0.140255	202	231
PTPRO	0.0125365	0.13439	1.14e-14	1.65083e-10	0.0932842	46	205
MGAT2	0.168525	0.0386828	0.0206842	1	4.35657	183	150
FGA	307.353	25.157	6.89e-07	0.00913683	12.2174	232	232
PPP1R7	3.77301	3.51085	0.257592	1	1.07467	232	232
RBMS1	0.459325	0.550973	0.294688	1	0.833661	173	166
UBE4B	0.0637825	0.0720224	0.383061	1	0.885592	179	203
NSF	2.89181	2.3747	0.000924786	1	1.21776	232	232
SVIL	0.140188	0.0810281	6.15e-07	0.00816535	1.73012	222	230
IRAK4	0.158274	0.00560203	0.127072	1	28.2529	146	45
IRF2BP1	0.146448	0.52202	2.9e-07	0.00387643	0.28054	174	212
MISP	0.0124868	0.0358319	0.000242329	1	0.348481	29	141
ATXN2	0.0555799	0.11208	0.00734098	1	0.495894	159	183
BRD4	0.104819	0.0463347	0.0396396	1	2.26221	175	128
BANF1	4.9657	4.11241	0.0518247	1	1.20749	232	231
CTPS1	0.306468	0.156211	4.01e-09	5.52458e-05	1.96188	225	228
S100A8	16.161	2.73248	0.0612686	1	5.91441	217	219
CCDC6	2.42181	2.48999	0.818974	1	0.972617	224	232
BHMT	57.9185	296.589	1.08e-23	1.62108e-19	0.195282	228	232
RAB8B	1.11528	0.96197	0.0475728	1	1.15937	231	229
HNMT	2.21697	3.82523	3.3e-10	4.62066e-06	0.579566	226	232
PLVAP	2.80088	2.13304	0.00406221	1	1.31309	228	232
DOCK1	0.136588	0.153516	0.24304	1	0.889729	222	232
RPS15A	21.6918	12.287	1.43e-14	2.06778e-10	1.76543	231	232
EVPL	0.134261	0.232935	0.00372526	1	0.57639	193	231
TFAM	2.85492	10.1628	3.25e-26	4.90652e-22	0.280918	221	232
METTL14	0.301804	0.270242	0.455352	1	1.11679	191	202
ASS1	7.13022	177.527	2.26e-53	3.52131e-49	0.0401642	230	232
CUL1	0.30948	0.260395	0.0399052	1	1.1885	230	232
PDXK	3.03149	5.66281	1.05e-17	1.54539e-13	0.535332	232	232
MED23	0.0409867	0.0312168	0.416382	1	1.31297	170	133
AIFM2	0.58085	0.189724	2.2e-09	3.04282e-05	3.06155	180	156
LCK	0.0634829	0.00858185	2.28e-08	0.000310787	7.39735	118	13
HOOK1	1.27507	0.855543	0.0264808	1	1.49036	206	230
LRRC40	0.667486	0.449835	0.000418922	1	1.48385	226	232
WARS2	0.158021	0.409229	3.17e-12	4.52391e-08	0.386143	169	230
WDFY1	0.885447	0.77065	0.406282	1	1.14896	232	232
FHOD1	0.158116	0.128174	0.295711	1	1.23361	221	180
ITSN1	0.167947	0.457606	0.000198793	1	0.367013	216	232
INTS7	0.0719559	0.0816635	0.397918	1	0.881126	186	148
PISD	0.124009	0.139315	0.496072	1	0.890134	157	208
MRPL46	0.411498	0.854827	2.96e-06	0.0386665	0.481381	204	232
TMED3	0.110017	0.00941353	1.89e-12	2.70175e-08	11.6871	127	28
BST1	0.973401	2.78115	2.8e-19	4.14988e-15	0.35	228	231
CBX1	3.39033	2.27293	0.0052785	1	1.49161	134	135
AGFG1	0.549292	0.364435	0.00852648	1	1.50724	228	231
APOC3	5.97121	10.4379	1.16e-07	0.00156287	0.572068	226	230
KRT73	0.117579	0.0497438	0.00962578	1	2.3637	140	57
RPS6KA3	0.654637	0.785602	0.0792902	1	0.833293	229	232
PAPSS1	0.788278	0.860887	0.450979	1	0.915658	220	232
NDUFS3	4.9687	42.1721	4.81e-76	7.57623e-72	0.11782	231	232
PARD3	0.0627281	0.0921856	0.00615027	1	0.680455	169	216
THOC7	0.596353	0.407256	0.0258651	1	1.46432	159	136
IPO7	0.594333	0.512487	0.059839	1	1.1597	232	232
RBM10	0.207869	0.270439	0.481186	1	0.768636	216	226
IKBKB	0.123898	0.0767539	0.00445703	1	1.61423	219	221
SGTA	2.47199	1.72957	0.120235	1	1.42925	223	232
MICAL1	0.490109	0.321421	0.0114156	1	1.52482	220	222
RPL5	4.62857	3.25961	2.74e-07	0.00366448	1.41998	231	232
BCKDK	1.37887	0.808207	6.22e-05	0.778744	1.70609	229	231
UTP18	0.527632	0.141818	0.000388872	1	3.72049	128	69
HP1BP3	3.7355	4.11772	0.137078	1	0.907176	231	232
ETFB	11.8814	68.0714	1.43e-59	2.23924e-55	0.174543	231	232
MMRN1	0.119859	0.0102241	3.08e-10	4.31416e-06	11.7233	146	44
PPIL4	0.144918	0.118675	0.115308	1	1.22113	199	218
PPIA	885.809	706.178	7.79e-06	0.100717	1.25437	232	232
GLO1	17.6261	26.7369	3.87e-12	5.51746e-08	0.659242	232	232
UBR3	0.00890918	0.0173616	0.0293694	1	0.513156	99	174
PPP3CB	0.184514	0.117339	0.000423822	1	1.57249	149	156
CA12	2.39481	4.70196	5.89e-20	8.75136e-16	0.509321	220	232
SREK1	0.284933	0.228536	0.0411	1	1.24677	206	195
CPPED1	2.1923	3.36904	1.1e-07	0.00148269	0.650719	230	232
LRRC57	0.541295	1.9899	1.09e-28	1.65222e-24	0.272021	215	232
CMC1	0.964795	4.43518	1.19e-22	1.78131e-18	0.217532	142	226
STX5	0.256605	0.229965	0.164944	1	1.11584	224	228
SLC9A3R2	1.40033	4.49496	9.25e-59	1.4479e-54	0.311534	209	232
TRPV2	0.121536	0.00571388	5.69e-11	8.02688e-07	21.2704	206	20
PPP1R12C	0.226293	0.217023	0.807828	1	1.04272	205	223
FEN1	0.386062	0.139657	9.84e-06	0.126847	2.76435	216	213
TIMP2	0.0484348	0.141808	0.000840649	1	0.341551	54	125
AUP1	0.247352	0.220323	0.253743	1	1.12268	218	228
S100A4	15.7314	7.01169	7.94e-07	0.010507	2.2436	232	228
HADHB	20.1004	46.8466	5.47e-31	8.32096e-27	0.429068	231	232
LRRFIP1	1.38228	0.835626	0.0313252	1	1.65419	228	232
MCFD2	1.78776	2.17777	0.00356734	1	0.820913	216	231
COL1A2	54.3901	20.7623	9.58e-13	1.37109e-08	2.61966	232	232
ITGB5	0.305427	0.313097	0.900207	1	0.975503	222	229
ANXA2	366.794	122.659	8.65e-24	1.29845e-19	2.99037	232	232
ANP32B	7.75334	10.307	7.4e-05	0.924186	0.752238	230	230
CES2	5.71534	11.3055	1.12e-11	1.59107e-07	0.505537	222	231
PON2	3.2035	1.09173	4.1e-07	0.00546325	2.93432	231	232
RBBP9	0.928716	1.38979	1.82e-05	0.232614	0.668241	207	231
HYPK	0.425702	0.347693	0.0784638	1	1.22436	205	207
RDX	14.6974	19.2724	0.000411334	1	0.762611	232	232
AHSG	17.773	11.9915	0.00165067	1	1.48213	232	232
EGFL7	0.0949619	0.0584625	0.200365	1	1.62432	117	82
ISCU	0.360243	0.750439	1.83e-10	2.56914e-06	0.480043	204	230
SNX3	5.52622	6.86678	0.000519111	1	0.804776	232	232
IST1	1.19098	1.24752	0.770284	1	0.954673	224	232
THBS1	9.1248	3.24119	3.56e-07	0.00475046	2.81526	232	232
EPRS	1.95002	1.80094	0.196843	1	1.08278	231	232
RBCK1	0.0466003	0.0250169	0.00491512	1	1.86275	156	130
PSME1	43.9621	24.2243	1.13e-11	1.60516e-07	1.8148	232	232
FDXR	1.34468	0.943417	0.0020663	1	1.42533	226	232
TMX1	1.24751	0.880794	6.74e-08	0.000911518	1.41635	228	231
ACTR3	18.6924	15.0446	0.000371242	1	1.24247	232	232
PTPN23	0.261562	0.390911	0.085589	1	0.669108	230	232
ATPAF2	0.492479	2.09583	1.52e-41	2.34247e-37	0.23498	200	232
SUMO2	0.553468	0.311188	0.00301938	1	1.77856	142	119
TMPPE	0.0905906	0.300354	7.57e-24	1.13664e-19	0.301613	159	226
GTF3C3	0.0995471	0.0615845	0.0867535	1	1.61643	200	201
IFT27	0.654005	0.839099	0.42725	1	0.779413	223	230
DICER1	0.0149388	0.0341748	7.61e-05	0.950032	0.437127	133	136
PDLIM3	1.0066	0.780357	0.184139	1	1.28992	209	205
NFATC2	0.0365828	0.00526142	4.08e-07	0.00543782	6.95303	171	27
43710	11.8245	10.9919	0.159186	1	1.07574	231	232
APOBEC3C	0.643079	0.0122169	0.0019517	1	52.6383	193	19
CDC73	0.255456	0.332141	0.223646	1	0.769118	209	220
HIST1H1A	0.49401	0.800863	0.024018	1	0.616847	48	119
POFUT2	0.138096	0.0437637	4e-07	0.0053332	3.1555	200	185
HARS2	1.17407	1.38627	0.0771944	1	0.846926	219	232
ADAMTSL1	0.00962297	0.0178401	0.0674346	1	0.5394	39	121
MRPS24	0.212743	0.636483	7.65e-17	1.12088e-12	0.334248	146	225
NCKIPSD	0.179214	0.146772	0.121134	1	1.22104	212	225
SERPINA5	0.711375	4.18871	1.62e-45	2.50582e-41	0.169832	215	232
RGL2	0.047903	0.0139384	0.000823643	1	3.43677	163	112
YME1L1	0.954297	1.67999	0.0403081	1	0.568037	209	230
BTF3L4	0.77539	0.664275	0.228889	1	1.16727	135	147
RUVBL1	2.64009	3.52628	0.000420522	1	0.748691	232	232
BNIP1	0.474548	0.640523	0.0421968	1	0.740875	218	225
RPL31	1.19407	1.07498	0.595779	1	1.11078	141	163
EXOSC3	0.478504	0.285668	0.321334	1	1.67504	199	203
MMS19	0.330152	0.189253	0.00199926	1	1.7445	222	227
TMSB4X	108.454	64.8791	0.00118398	1	1.67163	226	232
EEF1A1	133.905	123.207	0.178521	1	1.08683	232	232
PRPF3	0.156198	0.0887747	0.000451911	1	1.75949	205	199
PITRM1	0.813079	1.47824	5.5e-10	7.6769e-06	0.55003	227	232
APOBEC3G	0.496273	0.00658793	0.000970624	1	75.3306	197	32
GAPVD1	0.204996	0.175087	0.16201	1	1.17082	228	231
SEC31A	1.49356	3.32575	1.21e-18	1.78911e-14	0.449089	231	232
MFSD10	0.123659	0.043165	4.92e-09	6.76795e-05	2.86479	182	135
PARP10	0.0838758	0.0183742	0.0131982	1	4.56486	194	190
COL15A1	2.44199	1.62399	7.47e-07	0.00989402	1.5037	232	232
SPECC1L	0.279077	0.151637	0.0609413	1	1.84043	168	154
MRM1	0.0395733	0.125375	0.0147512	1	0.31564	111	211
TPST1	0.097572	0.226299	0.00472284	1	0.431165	111	124
PNPT1	0.532368	1.43913	9.41e-37	1.44293e-32	0.369923	229	232
CST3	9.92281	33.2305	5.12e-27	7.73888e-23	0.298606	226	231
APOA1	611.727	455.154	0.00136809	1	1.344	232	232
SFPQ	7.19811	6.20666	0.139868	1	1.15974	231	232
ATP2B2	0.0342919	0.0350686	0.932098	1	0.977853	99	140
F11R	0.461916	0.759581	4.46e-16	6.51428e-12	0.60812	231	230
RAB5A	3.82657	5.93757	3.21e-14	4.63428e-10	0.644468	231	232
GLIPR2	0.839169	0.502756	0.000446754	1	1.66914	218	202
EFHD1	1.86134	3.48832	1.43e-19	2.12169e-15	0.53359	218	232
SPAG9	0.41708	0.393487	0.39915	1	1.05996	225	232
OCIAD2	5.03475	11.5717	1.39e-15	2.0244e-11	0.435091	226	232
ADRM1	1.25304	0.945699	0.00055992	1	1.32499	230	230
CYFIP1	0.911847	0.695855	1.88e-06	0.0246694	1.3104	231	232
GOLT1B	0.887825	0.223739	8.83e-07	0.0116653	3.96812	203	179
LAMB1	3.76087	2.794	0.000183954	1	1.34605	231	232
TM9SF3	0.863712	0.84946	0.835317	1	1.01678	229	232
EPPK1	1.85037	0.677776	5.72e-11	8.06806e-07	2.73005	218	232
RTCA	1.09966	2.36996	1.62e-13	2.33021e-09	0.463999	230	232
UBXN6	1.2613	0.944549	0.0433394	1	1.33534	226	231
PPAT	0.278045	0.128111	7.86e-09	0.000107847	2.17035	219	214
PCK2	10.2888	288.45	1.31e-60	2.05316e-56	0.0356693	232	232
RPS13	8.0198	4.94433	4.56e-07	0.00607027	1.62202	231	232
SERPINB8	0.230453	0.0359457	2.94e-19	4.3559e-15	6.41115	165	31
KHK	11.7088	67.0399	5.27e-47	8.16797e-43	0.174655	223	232
ILK	5.70806	6.87075	0.000915465	1	0.830778	231	232
F13B	0.124979	0.0570105	0.000477321	1	2.19221	183	188
IARS2	3.48404	7.0171	4.11e-17	6.03348e-13	0.496507	231	232
VCPIP1	0.839729	0.731673	0.409535	1	1.14768	212	227
MTX2	0.657285	1.5115	8.02e-16	1.1702e-11	0.434855	223	232
GRPEL1	1.93881	5.45828	5.99e-34	9.15212e-30	0.355205	227	232
GLYAT	3.28259	53.0143	2.06e-53	3.20989e-49	0.0619188	200	232
SMAD4	0.152483	0.269581	0.00204554	1	0.56563	168	194
EHD4	6.1688	7.70906	0.000267481	1	0.800201	231	232
AXL	0.0352247	0.00213737	1.39e-09	1.92932e-05	16.4804	149	25
DTYMK	1.98029	1.9124	0.693947	1	1.0355	228	232
RHOG	2.40064	1.00944	4.02e-07	0.00535906	2.3782	230	231
AHCTF1	0.0472656	0.0140117	0.017695	1	3.37329	201	160
HLA-E	3.07937	0.874647	6.58e-16	9.60746e-12	3.5207	224	214
PLCG2	0.454584	0.690873	3.12e-05	0.395585	0.657985	229	232
SRM	1.37302	1.16163	0.085115	1	1.18198	228	230
LYN	0.598394	0.21644	7.6e-11	1.07031e-06	2.76471	229	228
ERLIN1	2.47994	2.79467	0.0801068	1	0.887383	227	232
RIPK2	0.0362429	0.00178306	1.45e-05	0.185861	20.3262	117	15
CCDC88A	0.0192966	0.0100054	0.0129483	1	1.92862	130	46
FMO3	0.223438	0.211554	0.734864	1	1.05618	171	200
NACA	4.18966	3.55463	0.0169872	1	1.17865	231	232
CLUH	0.225921	0.610462	1.43e-28	2.16688e-24	0.370081	214	231
NNMT	19.4268	1.1181	9.1e-08	0.00122805	17.3748	223	62
VDAC2	30.0124	50.168	1.27e-09	1.76428e-05	0.598238	231	232
PTPN1	2.16754	1.3874	1.65e-06	0.0216744	1.5623	231	232
VPS37A	0.317839	0.158838	0.0274789	1	2.00103	160	198
ALDH1L2	0.413025	1.61137	6.99e-26	1.05437e-21	0.256319	174	210
ASPA	1.40665	2.71922	2.74e-11	3.87573e-07	0.517301	210	232
MORC3	0.0595031	0.0189444	0.0107174	1	3.14094	161	73
TROVE2	1.53306	1.51041	0.834144	1	1.015	230	232
LAS1L	0.128393	0.0677945	6.01e-09	8.25774e-05	1.89386	214	210
RHOC	7.60388	10.9941	1.29e-08	0.000176498	0.691631	227	232
CTSA	1.35159	3.20465	2.48e-20	3.68999e-16	0.421759	230	232
ERAP2	0.483588	0.234112	3.99e-05	0.503458	2.06563	142	143
FBXO7	0.297654	0.19578	0.0229896	1	1.52035	218	215
SRSF2	5.26557	3.79142	3.75e-05	0.47385	1.38881	230	232
FKBP2	7.74685	12.2073	4.73e-14	6.81829e-10	0.634611	231	232
STRN	0.249612	0.275666	0.376271	1	0.905485	224	231
PITPNM1	0.0508966	0.0267983	0.00817902	1	1.89924	192	191
HPRT1	4.0732	5.51619	7.04e-09	9.6631e-05	0.738408	232	232
TCEA1	0.550958	0.53093	0.571591	1	1.03772	221	232
TAGLN2	101.287	60.8229	1.85e-09	2.56299e-05	1.66528	232	232
ADSL	0.621826	0.526376	0.0327935	1	1.18133	230	231
PLA2G15	0.0832334	0.213528	0.00156312	1	0.389802	118	183
RAB35	29.8968	26.8318	0.189611	1	1.11423	232	232
CPT1A	0.815423	2.84739	6.2e-39	9.5294e-35	0.286375	230	232
PURA	1.85066	2.67821	1.68e-07	0.00225439	0.691008	229	232
PSMD9	0.622725	0.765626	0.0216966	1	0.813354	227	232
MAL2	3.20431	12.5544	2.62e-32	3.99288e-28	0.255235	193	231
SLC12A9	0.209174	0.21308	0.858633	1	0.98167	225	230
UBE2N	9.15923	9.33583	0.716058	1	0.981083	232	232
ASNS	0.179018	0.033123	2.32e-13	3.33384e-09	5.40465	170	98
COG5	0.077807	0.0444701	0.00295447	1	1.74965	179	185
RAB2A	6.86998	5.03338	1.46e-07	0.00196195	1.36488	232	232
PRCP	0.432448	1.15281	1.25e-31	1.90325e-27	0.375124	229	232
TRAPPC2L	0.5976	0.352224	0.00104905	1	1.69665	210	221
GTPBP10	0.0355095	0.0987709	3.99e-13	5.72645e-09	0.359514	102	217
FCN3	0.368839	0.31453	0.305846	1	1.17267	196	184
STBD1	0.351709	0.0647218	5.87e-09	8.06714e-05	5.43416	204	126
YBX1	1.00178	0.350589	1.06e-05	0.136443	2.85743	172	153
RRAGC	0.536575	0.404942	0.000265209	1	1.32506	221	229
CGGBP1	0.143679	0.350683	7.4e-08	0.00100018	0.409713	150	179
RAB23	0.286737	0.589327	7.54e-08	0.0010188	0.48655	197	224
GANAB	7.19425	6.30031	0.0221851	1	1.14189	232	232
ARFGAP2	0.189527	0.212545	0.205995	1	0.891705	215	230
NARFL	0.183067	0.201371	0.797281	1	0.909104	153	193
SLC46A1	0.0732269	0.104697	0.0563331	1	0.699416	129	117
FAM188A	0.0888172	0.120683	0.0840766	1	0.735954	173	163
PPOX	0.295485	0.680336	1.34e-22	2.00558e-18	0.434322	215	232
NUCKS1	0.335008	0.316021	0.644942	1	1.06008	178	191
SNRPE	7.85632	5.59222	0.00053901	1	1.40486	229	229
CETN2	0.401742	0.512268	0.00199405	1	0.784241	216	229
LIPA	0.893673	0.198513	1.19e-24	1.79012e-20	4.50183	227	195
PMVK	3.52129	2.38473	5.47e-08	0.000741076	1.4766	229	232
PDPR	0.479314	0.904753	9.39e-17	1.37517e-12	0.529773	230	232
DNAJC3	0.917578	0.918576	0.99026	1	0.998913	232	231
CKMT2	1.51411	2.1647	0.382142	1	0.699454	57	226
ATP2B1	0.85158	0.94833	0.511309	1	0.897979	226	232
AKR7A2	10.8522	26.81	4.9e-34	7.48818e-30	0.404781	232	232
PIEZO1	0.0214251	0.00917375	6.38e-06	0.0826146	2.33548	189	141
TAP2	0.649505	0.0634093	9.1e-26	1.37246e-21	10.2431	227	177
F2	8.51912	3.71282	2.99e-08	0.00040679	2.29452	232	232
GSN	19.0983	15.1361	8.28e-05	1	1.26177	232	232
ALDH1B1	4.51781	24.7108	3.01e-21	4.48972e-17	0.182828	228	232
PTMS	12.0614	18.2894	0.000118331	1	0.659476	211	227
VAMP8	0.772328	1.60435	0.00282312	1	0.481397	146	166
MRPS35	0.16516	0.626193	2.99e-33	4.56364e-29	0.263752	183	227
GATM	43.3672	772.824	2.33e-66	3.66323e-62	0.0561153	231	232
SRSF5	1.56633	1.27398	0.0161039	1	1.22947	224	229
GMPPA	0.583154	0.690943	0.0158716	1	0.843998	230	232
MADD	0.00449737	0.0026853	0.15315	1	1.67481	133	103
LIG3	0.142171	0.205505	0.000348597	1	0.691811	218	231
TSFM	0.558856	1.34327	7.27e-21	1.08338e-16	0.416042	213	231
QSOX1	0.555798	0.0754434	0.0130803	1	7.36709	208	174
EIF2S3	2.006	1.76541	0.0187599	1	1.13628	232	232
LRCH3	0.0605043	0.0213276	0.129577	1	2.8369	173	161
SLC39A14	1.11127	0.491785	9.71e-07	0.0128182	2.25967	222	226
RNF40	0.121951	0.115488	0.661523	1	1.05597	197	219
AP5Z1	0.0374353	0.0377507	0.967785	1	0.991644	184	186
COX5B	29.5448	172.163	2.15e-47	3.33293e-43	0.171609	231	232
ZC3H15	0.159623	0.22814	0.0681671	1	0.699669	169	211
PSMB2	2.24312	1.77241	0.00826657	1	1.26558	228	231
HEATR5B	0.0694206	0.0928101	0.0206627	1	0.747985	205	228
MRPL53	0.337908	0.708175	3.84e-05	0.485069	0.477153	131	219
KIF2A	0.369196	0.150848	8.17e-05	1	2.44747	220	207
PPP1R13L	0.215753	0.0168088	6.73e-18	9.91598e-14	12.8357	205	58
EGLN1	0.252561	0.148722	0.00360348	1	1.69821	201	167
CDKN2C	0.142116	0.0617563	6.75e-05	0.84429	2.30123	137	115
ACADVL	12.3016	29.4776	3.06e-39	4.70628e-35	0.41732	231	232
LAIR1	0.116966	0.0072766	2.08e-08	0.000283754	16.0743	145	25
STAU2	0.109515	0.0549974	0.00963648	1	1.99128	185	193
NFU1	1.57956	3.65611	3.05e-24	4.58354e-20	0.432034	220	232
MPP6	0.370095	0.63453	0.00039968	1	0.583258	203	231
COG1	0.155951	0.13562	0.590438	1	1.14991	209	218
ELAVL1	2.9488	2.41012	0.0111581	1	1.22351	230	232
APPL1	0.321174	0.716738	6.87e-26	1.03634e-21	0.448105	227	232
MTSS1	0.00910043	0.031625	0.0255524	1	0.287761	82	142
CNN3	7.49637	7.67793	0.718537	1	0.976352	231	232
XPO7	0.486672	0.974466	0.015173	1	0.499424	230	232
MST1	0.206721	0.138252	0.0118355	1	1.49525	175	194
SERPINA3	38.51	15.763	7.5e-07	0.00993225	2.44307	231	232
ITIH4	5.85647	3.15816	1.82e-07	0.00244026	1.85439	232	232
RAD23B	2.5479	2.96584	0.00328061	1	0.85908	232	232
CKAP4	6.59112	3.89751	5.85e-09	8.04024e-05	1.69111	231	232
HADH	7.12539	88.6023	3.9e-80	6.14718e-76	0.08042	231	232
MIEN1	0.653868	0.931982	0.00118527	1	0.701588	187	206
F13A1	9.39116	2.96129	5.21e-06	0.0676362	3.1713	232	232
CTAGE5	0.150787	0.251571	1.05e-06	0.0138474	0.599381	213	226
LMNB1	10.1573	2.56528	3.19e-36	4.88676e-32	3.95952	231	232
NCEH1	5.30493	1.74523	2.24e-15	3.2592e-11	3.03967	232	232
RFC1	0.0377771	0.0172355	0.0255637	1	2.19182	184	178
XRN2	0.395041	0.475343	0.151003	1	0.831065	228	232
FUS	4.16094	2.88569	3.35e-08	0.000455332	1.44193	231	232
ABHD12	0.254691	0.216036	0.40766	1	1.17893	217	218
DYNC1LI2	2.77403	2.95705	0.510298	1	0.938109	229	232
TECR	1.73993	1.87965	0.359986	1	0.925667	229	230
KIAA1598	1.2768	1.33637	0.742662	1	0.955429	226	232
RFT1	0.0411125	0.0254019	0.0610786	1	1.61848	183	189
AP3S1	1.44775	1.03825	0.00226625	1	1.39442	220	226
DAGLB	0.176557	0.0243496	4.2e-19	6.21852e-15	7.25092	202	122
MMAB	2.49733	7.07913	1.35e-15	1.96641e-11	0.352773	221	232
PNPLA6	0.155411	0.276366	7.59e-17	1.11216e-12	0.562339	228	232
SPP1	0.501555	0.473877	0.908009	1	1.05841	111	166
HSPB11	0.552357	0.189599	0.000871759	1	2.91329	168	121
RSL1D1	0.918276	0.217004	1.17e-21	1.74751e-17	4.23161	228	229
CUL4B	0.280125	0.239135	0.0771621	1	1.17141	226	229
FBL	2.50675	1.43011	1.92e-11	2.72064e-07	1.75283	231	232
NUP188	0.0550777	0.0260945	1.45e-08	0.000198201	2.1107	219	210
DHRS7	2.56489	2.30048	0.470842	1	1.11493	231	232
IMPDH2	1.47289	1.00074	5.66e-06	0.0733819	1.47181	231	232
PROZ	0.0793414	0.183034	0.00656098	1	0.433478	122	132
PHPT1	1.92254	1.9691	0.802543	1	0.976355	221	232
PICALM	1.12835	1.60352	3.61e-11	5.10237e-07	0.703673	231	232
RSRC2	0.0396068	0.0263734	0.207734	1	1.50177	125	70
TXNRD2	0.872323	3.26757	5.49e-56	8.57977e-52	0.266964	223	232
CD180	0.0657245	0.0206506	0.051665	1	3.18268	124	7
PTPN11	0.487268	0.48605	0.972862	1	1.0025	230	232
NPM1	27.4623	15.5666	3.34e-06	0.043577	1.76418	231	232
NCKAP1	1.29229	1.38846	0.359493	1	0.930736	230	232
SLC2A3	0.644238	0.0105347	2.01e-07	0.0026934	61.1541	199	8
GOLGA3	0.281014	0.17688	0.000264494	1	1.58872	227	229
DENND3	0.0375641	0.0042769	0.00864937	1	8.78304	154	38
HSDL1	0.473327	0.490246	0.827932	1	0.965489	213	224
AMN	1.13845	6.72217	8.88e-39	1.3645e-34	0.169358	175	223
LSM14B	0.0376457	0.0158084	1.52e-06	0.019985	2.38138	152	98
RRM1	0.0216294	0.0044466	3.29e-06	0.0429279	4.86427	129	71
MGLL	2.76353	1.05422	5.27e-11	7.43755e-07	2.6214	227	232
HNRNPDL	9.42527	7.4404	7.95e-05	0.992081	1.26677	231	232
SERINC1	0.0587536	0.046334	0.110982	1	1.26805	158	154
BLOC1S5	0.477723	0.28446	0.0308925	1	1.6794	183	169
EIF3A	1.42219	1.4953	0.435818	1	0.951112	231	232
ABI1	0.387128	0.399845	0.641591	1	0.968194	226	232
DAB2	2.75094	9.08579	1.6e-44	2.47216e-40	0.302774	230	232
NDUFB3	1.22997	9.15982	6.49e-32	9.88557e-28	0.134278	217	230
IL18	0.196632	0.106121	0.00125017	1	1.8529	179	183
GPC4	0.0683312	0.144271	0.0015132	1	0.473631	118	213
DCP1A	0.114971	0.0521779	0.000109774	1	2.20344	173	145
MAMDC2	0.182547	0.103634	4.86e-06	0.0631314	1.76147	206	224
CSNK2A1	1.51374	1.29601	0.0358601	1	1.168	213	217
PRF1	0.126836	0.00395591	4.45e-18	6.5642e-14	32.0625	166	25
ATP6V1E1	5.22922	35.0261	2.84e-59	4.44602e-55	0.149295	232	232
DPCD	0.268307	0.121046	4.84e-11	6.83166e-07	2.21658	210	212
TRIO	0.088859	0.0128297	1.36e-14	1.96738e-10	6.92601	204	122
PWP1	0.138409	0.200465	0.124175	1	0.690443	192	152
HIP1	0.455433	0.591474	0.00247974	1	0.769996	227	232
GNB2	7.19969	8.48477	0.0011673	1	0.848542	232	232
TPM1	149.15	149.991	0.949924	1	0.994392	232	232
COA3	1.69819	8.27584	3.82e-29	5.7957e-25	0.205199	189	231
ATG3	1.14286	1.13776	0.966787	1	1.00448	231	232
CFI	1.36057	1.45501	0.415549	1	0.935096	232	232
ACTG1	759.687	997.125	7.77e-10	1.08252e-05	0.761877	221	232
NUB1	0.134241	0.0438746	5.04e-10	7.03987e-06	3.05966	201	181
IDH3G	1.05413	2.31327	7.81e-15	1.13229e-10	0.455687	228	232
RDH10	0.4785	0.335803	0.00517079	1	1.42494	185	227
ZFR	0.388865	0.596079	0.00380371	1	0.652371	222	226
STK3	0.271183	0.284886	0.829718	1	0.951898	220	228
YWHAH	20.8493	15.5132	0.000370089	1	1.34397	232	232
NOL6	0.0881397	0.0421785	0.120933	1	2.08968	201	161
ERCC3	0.0450369	0.0116474	1.04e-05	0.133931	3.86669	176	142
LIMCH1	0.712548	0.581018	0.0475589	1	1.22638	212	231
DNPH1	10.9886	28.0647	1.4e-24	2.10532e-20	0.391547	230	232
TRAPPC4	0.333812	0.503681	0.000433999	1	0.662745	223	231
SPCS1	1.02333	0.529576	0.0389695	1	1.93236	118	86
LCN2	1.59644	1.2773	0.573086	1	1.24986	140	218
FRG1	0.0581053	0.0414937	0.0476126	1	1.40034	158	138
STS	0.0657758	0.0348021	0.0565002	1	1.89	184	94
ARHGAP4	0.260837	0.0340212	8.89e-07	0.0117428	7.66688	224	170
GLG1	0.930805	0.898252	0.643594	1	1.03624	231	232
EXOSC5	0.12636	0.0946444	0.00328105	1	1.33511	193	191
ARPC5L	1.83371	3.80493	1.21e-32	1.84489e-28	0.481929	225	232
IL16	0.226009	0.0279329	3.97e-21	5.91967e-17	8.09112	223	188
H2AFY	15.7877	14.8331	0.300385	1	1.06436	231	232
TMEM192	2.84046	4.01496	0.00133734	1	0.707469	204	230
CDH11	0.171575	0.239845	0.479447	1	0.715358	183	224
NUBP1	0.231548	0.205217	0.458702	1	1.1283	204	208
ATAD1	0.536784	0.973847	4.02e-11	5.67825e-07	0.5512	224	232
GPS1	1.28479	1.3115	0.852153	1	0.979632	230	232
KPNA1	0.158642	0.107652	0.00107932	1	1.47365	193	170
ABCB7	0.195436	0.340006	0.00100293	1	0.574801	224	232
ADIPOQ	0.202554	0.0717476	2.65e-09	3.66071e-05	2.82315	170	118
ACAD9	0.523836	1.03875	2.71e-19	4.01703e-15	0.504297	228	232
ACTN2	7.48651	10.1348	7.51e-07	0.00994474	0.738691	213	227
IDE	0.570929	0.755581	0.000682776	1	0.755616	226	232
CAB39	1.0443	1.52488	1.66e-07	0.00222789	0.684839	229	232
HDHD2	1.61808	2.66057	1.44e-11	2.04365e-07	0.608171	225	232
RPL27	3.1493	2.86308	0.252112	1	1.09997	226	232
ILVBL	0.966965	3.1783	3.78e-42	5.82725e-38	0.30424	228	232
FBXO22	0.337292	0.396807	0.344876	1	0.850015	217	228
KRT2	0.807488	0.947168	0.414971	1	0.852529	231	226
CPT2	4.31208	11.7603	2.35e-25	3.54098e-21	0.366665	228	232
TUBB2A	20.7846	32.464	3.11e-05	0.394348	0.640235	94	152
MYH14	1.94017	2.17323	0.135086	1	0.892758	221	232
COL8A1	0.353794	0.0920323	3.55e-05	0.449217	3.84424	203	102
SND1	4.60557	4.04871	0.021812	1	1.13754	232	232
C14orf166	4.06621	5.66618	9.32e-10	1.29632e-05	0.717628	231	232
PPIB	80.9001	62.3829	0.00124099	1	1.29683	232	232
ACSL3	0.944393	0.70378	0.000947091	1	1.34189	230	232
NT5C	2.93997	2.76668	0.374458	1	1.06263	227	232
SRSF3	21.3316	15.8347	6.07e-07	0.00806035	1.34714	222	232
PTBP3	0.204397	0.24972	0.0487682	1	0.818507	217	227
EIF6	6.6706	5.99276	0.0939474	1	1.11311	232	232
PTK2B	0.149488	0.0991466	0.117954	1	1.50775	169	192
CASP7	0.121601	0.0718438	0.00176547	1	1.69257	191	166
SCYL2	0.0926409	0.189578	1.62e-06	0.0212868	0.488669	204	232
GABPA	0.127008	0.0487143	0.00155687	1	2.6072	206	190
LYPLA2	1.21068	2.1228	1.4e-09	1.94306e-05	0.570324	229	231
C8orf82	0.436526	1.8893	3.55e-61	5.56534e-57	0.231052	208	232
GCDH	1.29653	14.7634	9.72e-56	1.51826e-51	0.0878204	228	232
VPRBP	0.0395808	0.0605093	0.0214806	1	0.654128	207	226
C11orf68	0.419624	0.283519	1.64e-06	0.0215447	1.48006	224	229
FAM213A	2.30092	3.54974	6.39e-07	0.00848081	0.648195	230	232
NAT10	0.432754	0.153786	1.37e-12	1.95951e-08	2.814	224	229
SH3GLB2	0.63343	0.864591	0.066417	1	0.732635	215	229
SELM	0.355002	0.338898	0.689869	1	1.04752	189	218
IRF3	0.162773	0.105462	0.000716366	1	1.54343	188	152
BUD31	0.29331	0.293074	0.994569	1	1.00081	210	209
SEC16A	0.119913	0.0880371	0.0640619	1	1.36207	223	232
DDB1	2.13661	1.82012	0.00458862	1	1.17388	232	232
PPP5C	0.674894	0.672234	0.946348	1	1.00396	230	232
CLIC2	1.74484	2.47851	0.0167614	1	0.703988	226	232
PDS5B	0.14797	0.128398	0.0950907	1	1.15243	227	229
CARKD	0.784329	1.83433	1.15e-42	1.77387e-38	0.427583	222	232
SFXN4	0.217803	0.603079	2.03e-18	2.99811e-14	0.361152	167	227
PIK3C2A	0.0663246	0.0692308	0.787567	1	0.958021	212	227
PHGDH	4.05909	14.889	7.7e-41	1.1858e-36	0.272624	228	232
RALB	3.94592	5.69157	4.33e-12	6.17112e-08	0.693293	232	232
POGLUT1	0.0730448	0.05334	0.092522	1	1.36942	173	133
RNF31	0.0417041	0.0645825	0.137389	1	0.64575	206	219
RABGGTA	0.499446	0.512555	0.772688	1	0.974425	226	232
FKBP15	0.446356	0.366456	0.0617364	1	1.21803	229	232
IDH1	7.98411	37.5001	1.61e-53	2.50902e-49	0.212909	232	232
FHL2	0.288055	0.599423	8.86e-07	0.0117041	0.480554	194	230
LSM14A	0.232304	0.142427	0.00233313	1	1.63104	222	228
PPP4R2	0.0849253	0.0613444	0.00990092	1	1.3844	176	183
EMP3	0.278398	0.259851	0.822509	1	1.07138	122	35
LRG1	2.43284	1.56614	0.0782407	1	1.5534	230	232
SPINT1	0.130442	0.0866053	0.0566709	1	1.50617	167	199
RBM17	0.226876	0.136801	4.6e-08	0.000624174	1.65844	218	213
ANKLE2	0.0439266	0.0102231	0.00138984	1	4.29679	126	66
C16orf62	0.360395	0.723035	7.24e-17	1.06109e-12	0.498447	228	232
SLC9A1	0.0528578	0.0717491	0.175109	1	0.736704	160	202
PRODH2	1.10541	10.5939	7.08e-50	1.09974e-45	0.104344	157	224
PSAP	33.3189	26.9222	0.153251	1	1.2376	232	232
WIPF1	0.223064	0.0490456	3.7e-12	5.2762e-08	4.54809	203	134
WDR44	0.302274	0.208815	0.0614684	1	1.44756	216	226
ATP2A2	2.71214	1.80413	4.7e-11	6.63499e-07	1.5033	231	232
ARHGAP25	0.277567	0.0559151	2.84e-07	0.00379736	4.96408	222	132
SP100	0.211342	0.110799	6.06e-10	8.45491e-06	1.90744	205	170
EARS2	0.288448	0.768683	4.7e-18	6.92968e-14	0.37525	188	230
APOL1	0.238528	0.0838564	4.48e-10	6.26259e-06	2.84448	203	163
ISLR	0.0816356	0.068843	0.377341	1	1.18582	115	185
THOC1	0.126529	0.100796	0.0557876	1	1.2553	211	212
FAM91A1	0.206409	0.160451	0.0133794	1	1.28643	220	230
MCM3	0.241473	0.0230694	8.99e-22	1.34311e-17	10.4672	218	141
FIS1	6.48199	12.3935	1.4e-16	2.04918e-12	0.523015	228	232
NCKAP1L	0.215618	0.0182694	4.51e-15	6.54897e-11	11.8022	224	73
KYNU	0.626512	1.36351	1.27e-12	1.81686e-08	0.459484	190	223
CCT2	11.8755	12.6349	0.254247	1	0.939899	232	232
TRIM21	0.524687	0.189855	3.7e-07	0.00493617	2.76362	223	223
POMGNT1	0.0415045	0.0276619	0.114638	1	1.50042	158	177
TOM1	1.26294	1.56864	0.00773136	1	0.805116	232	232
QARS	1.0893	2.25096	3.81e-16	5.56717e-12	0.483924	231	232
VCL	9.43459	12.7158	7.49e-07	0.00991976	0.741956	231	232
NTMT1	0.536599	0.495092	0.697868	1	1.08384	174	177
INTS10	0.0394178	0.202254	0.0684688	1	0.194893	169	97
CCT4	7.27188	6.93446	0.30636	1	1.04866	232	232
BOP1	0.157486	0.133833	0.410445	1	1.17674	198	150
UBA7	0.369902	0.138956	2.75e-11	3.88932e-07	2.662	227	232
TLR3	1.10708	0.328944	1.29e-27	1.9519e-23	3.36556	221	219
GUK1	0.827972	0.846056	0.852729	1	0.978626	225	232
GAK	0.221549	0.304511	4.74e-05	0.596482	0.727555	226	232
RPL13A	14.7354	10.523	4.08e-07	0.00543782	1.4003	231	232
PRPF4	0.241866	0.216341	0.153573	1	1.11798	222	230
NRP1	0.76514	0.672584	0.0414093	1	1.13761	231	232
CFDP1	0.257251	0.105821	1.56e-09	2.16403e-05	2.43101	193	121
GSK3A	0.12294	0.161532	0.000975429	1	0.761088	213	231
PRPF39	0.683341	0.275278	0.107336	1	2.48237	195	193
DUSP23	2.51111	2.13837	0.140967	1	1.17431	229	229
LYPLA1	4.29013	4.9527	0.0529463	1	0.86622	225	232
CASC4	0.3664	0.204841	9.39e-06	0.121112	1.7887	213	225
TBXAS1	0.719055	0.0900662	1.55e-27	2.345e-23	7.98363	229	146
FGB	1073.66	69.0095	1.49e-06	0.019595	15.5582	232	232
MYO1F	0.246094	0.0417014	6.78e-11	9.55709e-07	5.90134	225	119
DERA	1.33804	1.57142	0.00827898	1	0.851487	231	232
NEFL	9.68616	0.944575	3.95e-14	5.69709e-10	10.2545	128	60
TMBIM1	0.620025	0.517876	0.183613	1	1.19725	227	232
PDXDC1	0.403147	0.548122	0.00395559	1	0.735506	225	232
PCBD2	0.765887	0.699287	0.423318	1	1.09524	205	222
PLS1	2.88997	4.80042	1.06e-12	1.51665e-08	0.602025	228	232
ICT1	0.440816	1.1132	3.27e-10	4.57931e-06	0.395989	143	221
RPL11	11.5789	8.15417	2.52e-06	0.0329666	1.42	231	232
MRPL44	0.403346	1.35373	2.53e-22	3.78437e-18	0.297953	217	232
USP9Y	0.0823955	0.0983434	0.242622	1	0.837835	167	176
TPD52L1	0.395839	4.15967	2.83e-05	0.35924	0.0951612	85	178
APMAP	4.59997	2.54074	2.31e-09	3.19404e-05	1.81049	232	232
CCT5	8.54546	7.23549	0.0014492	1	1.18105	232	232
GRSF1	0.300891	0.52141	0.00123494	1	0.577072	217	232
PCOLCE	3.10453	2.86329	0.844932	1	1.08425	183	218
CCT8	10.1342	9.19281	0.0799345	1	1.10241	232	232
PGAM5	0.566209	1.63265	1.08e-13	1.55444e-09	0.346804	201	230
RBBP5	0.146802	0.145557	0.958949	1	1.00856	191	182
ECI2	3.3773	27.8998	7.69e-63	1.20671e-58	0.121051	229	232
ERCC2	0.0236806	0.0158213	0.0240857	1	1.49675	161	147
CRYAB	355.479	95.545	5.88e-06	0.0762224	3.72054	232	232
SERPINB6	2.8543	4.82799	2.68e-13	3.84955e-09	0.5912	231	232
ANGEL2	0.0214634	0.0481859	0.0091426	1	0.445428	72	129
CYB5R1	2.00682	5.04579	3.74e-33	5.70724e-29	0.397721	228	232
NDUFA12	2.15021	25.3393	3.81e-72	5.99808e-68	0.0848569	228	232
FAF1	0.229141	0.240897	0.587607	1	0.951199	218	231
VPS36	0.7186	0.878941	0.0070856	1	0.817575	230	232
PCYOX1L	0.113923	0.0508738	0.00145322	1	2.23933	209	190
CCDC9	0.196693	0.221483	0.495078	1	0.88807	174	131
NOB1	0.024318	0.00372957	2.18e-06	0.0285558	6.52033	124	76
S100A13	3.84982	1.98452	2.21e-10	3.09975e-06	1.93993	227	230
MSN	30.2894	38.126	3.43e-05	0.434272	0.794456	232	232
SEC24D	0.182778	0.03748	7.06e-11	9.94895e-07	4.87667	226	175
ATP5J	13.3992	55.1161	1.2e-50	1.86564e-46	0.243108	231	232
AGT	4.32214	6.71476	1.22e-08	0.000166969	0.643678	232	232
SCLY	0.329193	0.825257	4.51e-24	6.77492e-20	0.398898	210	232
RTFDC1	0.0700223	0.0251222	0.0186749	1	2.78726	134	126
CFP	0.0759428	0.0295749	0.000110227	1	2.56782	148	135
TMEM63B	0.040783	0.0127083	0.00235989	1	3.20916	176	169
CDH1	0.379806	1.26824	1.5e-21	2.23995e-17	0.299476	206	232
FUK	0.310559	0.361201	0.0513965	1	0.859797	226	232
CTSZ	2.66298	4.24877	2.62e-06	0.0342565	0.626764	230	232
DBNL	1.21659	1.07599	0.149996	1	1.13067	232	232
SEC22B	6.40095	5.11531	0.000693713	1	1.25133	232	232
MON2	0.158702	0.154704	0.839594	1	1.02584	217	231
PTPN2	0.0798802	0.038449	7.7e-05	0.961114	2.07756	162	115
TPP2	0.878227	0.489002	8.37e-12	1.19047e-07	1.79596	232	232
C15orf48	0.269199	0.114766	0.00341672	1	2.34563	117	146
COQ7	0.989542	2.22895	1.38e-09	1.91585e-05	0.443949	147	221
PALLD	1.01367	1.41792	0.00590804	1	0.714895	222	232
MTMR10	0.0651175	0.10419	0.0014338	1	0.624988	156	215
TUFM	16.1488	64.7071	1.31e-61	2.05447e-57	0.249567	231	232
ACSF3	0.0998585	0.376075	8.4e-26	1.26697e-21	0.265528	195	232
GOLGA4	0.0519971	0.101498	3.27e-06	0.0426702	0.512297	200	231
METTL7B	1.74562	2.04095	0.0766663	1	0.855297	219	226
RPS5	5.57666	3.37956	3.14e-08	0.00042704	1.65011	231	232
PARL	0.138445	0.130255	0.72937	1	1.06288	168	195
UBR4	0.193425	0.223046	0.0880799	1	0.867199	231	232
SLAIN2	0.0751374	0.0766241	0.922956	1	0.980597	144	162
WRNIP1	0.117493	0.0934982	0.0221084	1	1.25663	207	223
PRMT1	4.2606	2.79528	0.000456745	1	1.52421	231	232
MRC2	0.142877	0.221602	2.5e-05	0.318075	0.644745	226	232
MCM5	0.143931	0.00366198	6.12e-21	9.12186e-17	39.304	190	24
EIF2B2	0.183615	0.197349	0.422721	1	0.930406	213	226
RPS28	19.7399	13.3142	0.000386426	1	1.48262	227	232
RPL12	11.3699	7.18766	1.58e-07	0.00212131	1.58186	231	232
LRSAM1	0.381731	0.224221	0.00746695	1	1.70248	201	216
ACOX1	0.790714	7.16986	8.11e-60	1.27019e-55	0.110283	224	232
PLOD3	1.75897	0.228199	1.08e-18	1.597e-14	7.70803	231	229
NEMF	0.0916046	0.0465023	0.0577633	1	1.96989	165	199
AOC3	2.8621	11.7042	1.07e-30	1.62715e-26	0.244536	225	232
POLDIP3	0.101877	0.10623	0.870402	1	0.959023	179	191
CHORDC1	0.212743	0.228003	0.500294	1	0.93307	213	217
DPH5	0.0574041	0.0373687	0.256245	1	1.53616	96	138
FARP1	0.86825	2.08038	1.66e-32	2.53034e-28	0.417352	229	232
LSM7	0.617895	0.463801	0.0624192	1	1.33224	188	173
DNAJC10	0.202389	0.712548	9.97e-07	0.0131574	0.284036	209	203
AGR2	0.0483242	0.110611	0.0895924	1	0.436883	11	139
CSTF3	0.527514	0.425667	0.252234	1	1.23927	211	219
RCC2	1.22168	0.683688	1.82e-11	2.57967e-07	1.7869	228	232
STAMBPL1	0.0978654	0.00590056	1.31e-07	0.001763	16.5858	164	9
BET1L	0.489365	0.347913	0.0681123	1	1.40657	177	160
DIABLO	1.25577	1.98215	0.00333287	1	0.633541	227	232
LMNA	56.519	31.5923	7.19e-14	1.03558e-09	1.78901	231	232
FKBP10	2.8289	0.14497	4e-13	5.7404e-09	19.5137	229	223
PAFAH1B3	1.33593	1.23676	0.701456	1	1.08019	228	232
FXR1	0.578364	0.76939	0.000870441	1	0.751719	227	232
KIF3A	0.108535	0.096881	0.235366	1	1.12029	184	213
DOCK2	0.34798	0.0308053	7.64e-24	1.14707e-19	11.2961	226	119
CD63	1.68208	0.491749	3.93e-09	5.41515e-05	3.4206	212	190
NDUFA13	5.07385	33.4724	1.18e-93	1.86086e-89	0.151583	230	232
ZC3H14	0.0744718	0.0553138	0.13779	1	1.34635	176	172
CNN1	9.4305	9.71583	0.930248	1	0.970632	219	232
SRSF4	1.0129	0.706477	0.00784708	1	1.43373	219	221
PEA15	7.11407	3.86365	9.63e-09	0.000131931	1.84128	231	232
ACAT2	0.802937	1.45797	8.2e-19	1.21303e-14	0.550724	230	232
LMTK2	0.0407709	0.0402061	0.917374	1	1.01405	198	221
AMFR	0.0124073	0.0337359	1.8e-05	0.230148	0.367776	63	138
MTR	0.143928	0.127023	0.250008	1	1.13308	199	221
FBLIM1	0.510448	0.920119	0.000228907	1	0.554763	200	229
PAK2	1.62657	1.20626	6.05e-05	0.757944	1.34844	231	232
EIF2B3	0.469132	0.510467	0.490142	1	0.919024	221	232
LASP1	9.00439	5.42587	2.42e-13	3.47706e-09	1.65953	231	232
ATXN10	0.495212	0.260797	0.00389757	1	1.89884	220	230
LMOD1	0.285527	0.228585	0.210611	1	1.24911	192	222
GATC	0.148762	0.28907	0.000463232	1	0.514625	132	221
DIS3L2	0.063857	0.06699	0.846294	1	0.953231	200	223
FAM120A	0.94061	0.945072	0.939104	1	0.995279	231	232
ACE2	2.21042	5.00263	0.000504776	1	0.441851	194	228
PTCD3	0.231752	0.866728	7.53e-39	1.15721e-34	0.267387	216	232
TINAGL1	16.8868	53.0845	5.52e-30	8.38598e-26	0.318111	232	232
PTPRK	0.0608713	0.0681863	0.350508	1	0.89272	198	229
ZFYVE16	0.0411654	0.0459339	0.636364	1	0.896188	185	176
STX12	1.10704	1.38462	0.00188033	1	0.799524	231	232
CFD	0.924278	9.96962	2.35e-25	3.54098e-21	0.0927094	219	232
FOCAD	0.0898177	0.00600741	0.0826635	1	14.9511	181	90
MRPL11	0.400371	0.908817	8.97e-11	1.26262e-06	0.440541	209	227
NCF2	0.342856	0.0161153	5.5e-05	0.690415	21.2753	192	58
LCLAT1	0.34932	0.328646	0.563668	1	1.0629	218	232
IGFBP4	0.07491	0.104917	0.119069	1	0.713991	121	141
RASIP1	0.353196	0.255535	0.0129495	1	1.38218	214	230
TOR1AIP1	1.31805	0.9507	1.21e-06	0.0159381	1.3864	231	232
RPL28	1.7442	1.2549	0.000190359	1	1.38991	225	226
PRRC1	1.21705	1.28282	0.388072	1	0.948727	230	232
STX16	0.258867	0.218641	0.221014	1	1.18398	217	217
TGFB1I1	1.24183	2.14041	3.72e-15	5.40404e-11	0.580185	229	232
GPD2	1.88196	2.01862	0.357994	1	0.932299	231	232
COPS4	1.63016	2.92581	1.98e-22	2.96228e-18	0.557166	231	232
ELP6	0.070845	0.162652	1.02e-05	0.131407	0.435561	137	196
SDF2L1	0.337545	0.451746	0.0223184	1	0.7472	200	216
LMAN1	6.86259	5.23624	0.000516437	1	1.3106	232	232
ENY2	0.380958	0.37688	0.896841	1	1.01082	193	214
ROMO1	0.690069	1.87188	2.12e-05	0.2703	0.368651	153	199
GAR1	0.495657	0.318292	1.99e-05	0.253884	1.55724	215	219
FHIT	0.938439	5.36789	3.91e-67	6.14887e-63	0.174824	212	232
DFNA5	0.425057	0.218091	5.3e-05	0.665627	1.94899	219	228
GTF3C4	0.495489	0.268444	0.0154181	1	1.84578	205	224
GPC6	0.131931	0.0760475	0.000851738	1	1.73485	196	209
LDHB	122.084	556.663	2.25e-77	3.54488e-73	0.219314	232	232
ISYNA1	1.36917	1.72565	0.0185618	1	0.793424	224	232
ACYP2	0.220458	0.225223	0.875882	1	0.978847	155	168
SF3B4	0.385853	0.426081	0.345605	1	0.905585	220	230
MX2	0.135716	0.0370322	8.53e-12	1.21297e-07	3.6648	208	115
TIMM8A	3.31843	6.58496	3.41e-14	4.92165e-10	0.50394	229	232
UTP6	0.016475	0.00330698	0.000756034	1	4.9819	121	50
ABHD11	1.06811	2.17331	5.43e-11	7.66282e-07	0.491469	225	232
POLR2C	0.287894	0.267268	0.513808	1	1.07718	220	225
YWHAE	139.667	112.811	1.97e-05	0.251392	1.23807	232	232
MPP1	0.51027	0.738447	7.31e-09	0.000100322	0.691005	230	232
RIC8A	0.474612	0.206903	2.21e-12	3.15787e-08	2.29389	228	231
GZMK	0.348617	0.00805793	1.71e-05	0.218795	43.2638	135	8
MTCH1	0.42232	1.14044	1.81e-20	2.69455e-16	0.370314	213	232
F11	0.0247086	0.0390086	0.0383994	1	0.633413	103	172
GRIPAP1	0.448344	0.772423	5.88e-06	0.0762224	0.580439	224	231
FAT1	0.0273873	0.00346836	4.73e-09	6.50801e-05	7.89632	177	66
TBL3	0.234543	0.085914	0.00115656	1	2.72997	211	218
RAB12	0.212444	0.207207	0.822803	1	1.02527	221	232
LCP2	0.145889	0.00504901	3.97e-14	5.72553e-10	28.8947	199	15
ACTB	825.686	1044.93	4.98e-08	0.000675487	0.790181	232	232
MRPS6	0.386136	1.08531	6.14e-13	8.79985e-09	0.355784	151	226
BLOC1S2	1.46516	0.977732	0.00082595	1	1.49853	217	210
OAS1	0.242678	0.0547568	1.68e-09	2.32949e-05	4.43192	151	64
DCTN6	0.650902	0.693648	0.318417	1	0.938374	220	220
ACSL5	0.144775	0.0159395	7.34e-11	1.03406e-06	9.08281	186	46
PRDX6	86.355	157.48	7.59e-20	1.12727e-15	0.548355	232	232
GYG1	1.73253	1.06112	0.0377739	1	1.63274	229	232
ACP5	0.501831	0.447197	0.609869	1	1.12217	192	217
PDLIM2	0.619439	6.54833	9.7e-56	1.51524e-51	0.0945951	219	231
UBA2	0.770845	0.648859	0.0240483	1	1.188	227	232
LSM2	1.3844	1.11198	0.00361478	1	1.24499	227	232
NXN	0.0669256	0.0329883	0.0101773	1	2.02877	147	133
GNL1	3.42607	3.95762	0.223264	1	0.865689	228	231
PRKAA1	2.77614	2.21742	0.0252925	1	1.25197	229	232
ACO2	32.4242	137.251	1.23e-54	1.91892e-50	0.23624	232	232
KHDRBS3	0.817677	0.947317	0.119901	1	0.863151	192	228
PPP2R4	2.42659	4.26075	2.33e-20	3.46751e-16	0.569522	231	232
HK3	1.45482	0.0425869	1.11e-07	0.00149606	34.1613	188	27
NANS	8.17058	13.0014	0.000772856	1	0.628436	232	232
PRKAR2B	0.530797	2.13713	1.29e-35	1.97486e-31	0.248369	174	228
ATXN2L	0.310704	0.176413	0.000293862	1	1.76123	219	221
ANGPTL4	0.540611	0.016379	0.00063889	1	33.0063	186	9
TTC28	0.0168663	0.00355677	0.000673341	1	4.74204	163	95
C12orf23	0.998113	0.286559	7.55e-11	1.06334e-06	3.4831	197	115
SMC3	0.878899	1.14893	0.000188945	1	0.764973	230	232
CD81	8.24882	7.60767	0.329073	1	1.08428	232	232
CHD2	0.0160084	0.00618379	7.6e-10	1.05898e-05	2.58876	178	128
COG4	0.216145	0.202735	0.644003	1	1.06615	219	228
MRPL4	0.186096	0.497635	2.16e-15	3.14323e-11	0.37396	153	222
CPNE3	2.3863	2.06613	0.0136609	1	1.15496	232	232
CASP1	1.05072	0.163244	2.26e-21	3.37282e-17	6.43652	229	170
HPX	146.785	108.938	0.0012488	1	1.34741	232	232
NUP37	0.481087	0.559667	0.219846	1	0.859596	218	221
RAB10	4.4429	4.24227	0.661407	1	1.04729	232	232
DNASE2	0.163815	0.0916787	9.75e-07	0.012869	1.78684	197	167
OXA1L	0.384647	0.447643	0.538862	1	0.859273	119	172
CNPY2	2.58094	3.24796	0.00186189	1	0.794634	230	232
STK38L	0.138208	0.130808	0.654799	1	1.05657	214	224
PIP4K2C	1.52911	5.04702	4.36e-06	0.0567149	0.302973	220	232
TUBGCP2	0.240886	0.159146	6.22e-05	0.778744	1.51362	222	232
SPNS1	0.245263	0.127614	6.14e-07	0.00815269	1.92191	214	215
STAG1	0.227203	0.157092	0.173197	1	1.4463	209	186
C9orf142	0.642177	0.614495	0.80461	1	1.04505	214	222
AKT1	0.203093	0.14369	0.000388768	1	1.41341	218	221
BABAM1	0.407586	0.481975	0.0959316	1	0.845657	216	228
RAP1A	6.03489	10.6069	1.15e-22	1.72178e-18	0.568957	232	232
TUBG1	0.206128	0.174454	0.0991213	1	1.18156	146	141
HLA-DPB1	1.58043	0.459471	3.36e-18	4.95835e-14	3.43966	227	204
DHX15	2.37956	2.50949	0.249993	1	0.948224	231	232
PPP1CB	4.00047	3.89389	0.639746	1	1.02737	232	232
AMPD2	1.18699	0.864446	0.00207693	1	1.37312	231	231
CSTF2T	0.124166	0.0601983	0.00048477	1	2.06262	121	112
KXD1	0.111072	0.196325	0.00157625	1	0.565754	156	157
PSMB8	2.63447	0.850009	6.37e-26	9.61169e-22	3.09934	231	232
ADAP2	0.0583804	0.00202767	1.96e-10	2.75047e-06	28.7919	116	10
FAM195B	0.331354	0.263311	0.0284489	1	1.25841	192	207
MSH6	0.0927918	0.02964	2.2e-08	0.000299948	3.13063	203	155
CFHR3	0.114634	0.1907	0.148623	1	0.601122	163	188
PSMA3	6.64541	5.86531	0.0323022	1	1.133	232	232
MAPK14	0.776889	0.525893	0.00310032	1	1.47728	229	232
TMEM179B	0.067709	0.00837914	1.74e-24	2.61609e-20	8.08066	154	46
AP1G2	0.0820848	0.0542871	0.011733	1	1.51205	195	202
EPB41L2	1.10836	1.62711	1.82e-08	0.000248503	0.681185	230	232
PPP1R14B	0.499434	0.123571	1.49e-05	0.190958	4.04168	141	71
CFB	4.44731	3.20636	0.0198693	1	1.38703	232	232
PHACTR4	0.011086	0.0335543	1.02e-05	0.131407	0.33039	117	183
CAPN7	0.0593769	0.109993	0.00181033	1	0.539827	187	225
UBE2I	5.16776	2.20777	9e-19	1.33119e-14	2.34072	228	232
XRCC4	0.177159	0.11819	0.0467225	1	1.49893	201	191
SERPINA1	270.045	179.347	0.000136381	1	1.50571	232	232
FAM105A	0.169191	0.0435667	8.06e-11	1.13501e-06	3.8835	196	115
ENO3	280.604	110.623	4.04e-24	6.06929e-20	2.53659	232	231
IFI30	0.208182	0.0747098	0.00725232	1	2.78655	142	135
CDH13	2.18271	0.913772	2.11e-17	3.1017e-13	2.38868	228	232
ECHDC1	4.77061	13.1466	1.77e-46	2.74191e-42	0.362878	229	232
ABI3BP	0.230951	0.110543	0.0174168	1	2.08924	187	181
SLTM	0.227312	0.222346	0.906894	1	1.02234	178	174
SCRN2	1.34339	6.80174	8.77e-56	1.37005e-51	0.197507	226	232
CUL5	0.582102	0.672903	0.13819	1	0.86506	231	232
CRADD	0.253406	0.458475	0.000246003	1	0.552715	185	213
MZT1	0.58946	0.387006	0.0026507	1	1.52313	211	193
LAMA1	0.296103	0.212527	0.17327	1	1.39325	179	230
AAR2	0.0773006	0.0261223	0.000251843	1	2.95918	177	125
RPL35	0.997183	0.686615	0.0255322	1	1.45232	164	173
IRGQ	0.55883	0.644681	0.513159	1	0.866832	218	227
NAGLU	0.278681	2.01716	1.23e-43	1.89912e-39	0.138155	224	232
CISD1	23.286	49.3006	1.09e-15	1.58911e-11	0.472328	229	232
GLTP	1.67234	2.90188	0.0284843	1	0.576296	210	232
GCN1L1	0.494153	0.512292	0.581271	1	0.964592	231	232
EXOSC8	0.206471	0.15993	0.489424	1	1.29101	194	174
PLXNB2	0.576672	0.647023	0.16771	1	0.891269	230	232
CARS	0.659424	0.385556	3.84e-06	0.0500314	1.71032	231	232
RABEP1	0.328592	0.309919	0.722912	1	1.06025	218	232
UGT2B7	5.87503	92.9855	4.63e-56	7.23669e-52	0.0631822	203	230
TTC39B	0.0995986	0.526901	6.48e-26	9.77702e-22	0.189027	185	229
GSS	3.12962	5.37068	3.94e-09	5.42853e-05	0.582723	232	232
KIAA1217	0.374515	0.484291	0.0412586	1	0.773327	223	232
MRPS9	0.192338	0.659033	2.22e-29	3.36885e-25	0.291848	198	231
ITPK1	0.0409275	0.0471069	0.441424	1	0.86882	155	151
EXOC5	0.475862	0.416286	0.41577	1	1.14311	223	232
DDAH1	18.5606	51.97	4.18e-46	6.47106e-42	0.357141	231	232
GET4	0.581858	3.12766	1.55e-26	2.34112e-22	0.186036	217	232
SF3A3	1.08029	1.05069	0.626031	1	1.02818	230	232
SRSF11	0.715529	0.612827	0.0244101	1	1.16759	222	231
NDUFAF3	0.544261	1.36272	4.8e-09	6.60336e-05	0.399392	160	226
SLC4A1	9.7415	4.93879	0.000351797	1	1.97245	232	232
C11orf58	0.404043	0.261172	0.000527232	1	1.54704	178	170
PARN	0.436373	0.772436	0.0246611	1	0.564931	179	181
FXN	0.41421	1.39993	9.85e-12	1.39978e-07	0.29588	117	211
43717	3.55086	3.08025	0.0114438	1	1.15278	231	232
BLMH	1.53414	1.39459	0.103842	1	1.10007	232	232
SYNPO2	0.398831	0.390768	0.904514	1	1.02063	207	229
TLN2	2.0799	2.09252	0.932013	1	0.993967	227	232
PTRF	13.1393	4.77471	4.88e-19	7.22386e-15	2.75186	231	232
TP53RK	0.150946	0.213411	0.000264779	1	0.7073	181	209
MFN1	0.0771121	0.184436	5.67e-07	0.00753373	0.418097	191	231
GBP1	2.63367	0.406713	1.23e-14	1.78092e-10	6.4755	228	227
BPHL	2.15833	34.259	1.84e-61	2.88549e-57	0.0630005	219	232
OLA1	2.23286	2.54868	0.0101246	1	0.876083	232	232
CTSC	1.6064	4.76674	9.01e-27	1.36123e-22	0.337001	230	232
MYL6	95.6804	75.8674	0.00727001	1	1.26115	232	232
DHX8	0.0399687	0.0338256	0.121225	1	1.18161	189	198
MRE11A	0.609218	0.368246	3.4e-12	4.85044e-08	1.65438	227	231
BGN	244.375	169.469	0.0201388	1	1.442	232	232
MTMR14	0.0463403	0.0371048	0.340212	1	1.2489	168	181
ALG1	0.255932	0.184612	0.00455697	1	1.38632	220	229
NID1	13.5336	11.6509	0.0163742	1	1.16159	232	232
PEX19	0.235206	0.25003	0.63364	1	0.94071	208	224
CPSF6	0.976564	0.789496	0.00199726	1	1.23695	228	231
STUB1	0.24366	0.516425	6.14e-15	8.90791e-11	0.471822	215	232
NOP9	0.111496	0.0472591	2.01e-09	2.78264e-05	2.35924	204	180
CNDP2	240.063	163.745	2.38e-06	0.0311542	1.46608	232	232
SF3B1	1.10095	1.01102	0.140554	1	1.08895	229	232
IPO9	0.518539	0.311597	1.24e-08	0.000169669	1.66413	231	231
ARHGAP5	0.0359183	0.0756808	2.45e-09	3.38639e-05	0.474603	177	228
PYROXD2	0.0703591	0.267905	8.71e-07	0.0115103	0.262627	92	181
PARP9	0.517619	0.165401	1.74e-05	0.222563	3.12947	217	162
PDK3	1.00452	2.38793	2.49e-17	3.65905e-13	0.420666	225	232
EZR	29.9107	35.0848	0.0821087	1	0.852526	232	232
NHP2	0.867179	0.490419	2.48e-07	0.00331874	1.76824	203	189
ARMC8	0.144275	0.103141	0.0343352	1	1.39882	217	221
PRPSAP1	1.49267	2.36101	5.49e-06	0.0712108	0.632218	232	232
AAMP	0.399218	0.372476	0.682029	1	1.0718	185	177
PPP1CC	2.32217	2.5893	0.0278229	1	0.896836	223	224
DIDO1	0.0413338	0.0121369	1.81e-07	0.00242721	3.40562	178	135
KDM1A	0.306422	0.230715	0.0402024	1	1.32814	214	229
IDH2	41.1794	293.371	3.4e-68	5.34922e-64	0.140366	232	232
CD40	0.0833841	0.0156761	4.61e-08	0.000625485	5.31918	132	16
UHRF2	0.0306224	0.0160053	0.0538188	1	1.91327	133	100
ALG3	0.119242	0.07875	0.00610047	1	1.51418	189	191
VTI1B	0.212216	0.19235	0.486475	1	1.10328	148	169
EXOSC9	0.210791	0.0784742	1.55e-08	0.000211777	2.68612	196	151
BRI3BP	0.151679	0.233366	0.00622368	1	0.64996	187	178
NRBP2	0.136396	0.0453827	1.34e-06	0.0176357	3.00545	133	133
CYBA	0.390035	0.0451133	5.31e-06	0.0689079	8.64568	170	93
ABAT	3.56851	71.1549	8.87e-64	1.3925e-59	0.0501513	216	231
CCDC90B	1.87093	1.05558	0.114377	1	1.77242	206	230
SDPR	0.827774	0.68615	0.255619	1	1.2064	214	231
PDHB	10.3996	50.7426	1.01e-67	1.58883e-63	0.204948	230	232
PDCD4	0.986116	0.783922	0.0193675	1	1.25793	230	232
ASB9	0.130052	0.475451	9.68e-10	1.346e-05	0.273533	85	218
POSTN	68.8536	6.59513	2.12e-09	2.93281e-05	10.4401	232	231
SSBP1	9.41753	9.66597	0.788018	1	0.974297	231	232
LYVE1	0.0965016	0.104007	0.774216	1	0.927834	105	141
FMNL1	0.150019	0.00860901	5.81e-12	8.27402e-08	17.4258	220	53
FARSB	1.62045	1.62393	0.972709	1	0.997856	231	232
DYSF	1.9267	1.21163	7.76e-14	1.11752e-09	1.59017	231	232
PRPF40A	0.113348	0.105563	0.562766	1	1.07375	228	227
HM13	10.7268	2.8753	6.15e-08	0.000832526	3.73069	231	232
RBM47	0.777464	1.33045	4.4e-12	6.27e-08	0.58436	216	232
RNF14	0.373569	0.319203	0.361086	1	1.17032	200	214
BCMO1	0.026346	0.0124786	1.43e-07	0.00192192	2.1113	135	119
NDUFAF7	0.253225	0.611079	3.24e-17	4.75924e-13	0.41439	186	229
YARS2	0.243756	0.536523	6.46e-09	8.87087e-05	0.454325	216	231
C11orf31	1.18968	1.27703	0.565239	1	0.9316	213	219
OPA1	1.40912	3.04755	6.19e-36	9.47937e-32	0.462378	231	232
HSD17B14	0.121873	0.344055	6.21e-08	0.000840523	0.354225	92	188
RPL14	13.4291	8.57184	7.36e-08	0.000994925	1.56666	231	232
PTPN12	0.277067	0.0902087	5.33e-12	7.59205e-08	3.07139	218	150
MFN2	0.371631	0.817397	2.23e-17	3.27765e-13	0.454651	224	232
SYNCRIP	7.83837	6.97488	0.0254994	1	1.1238	232	232
KMO	0.893505	4.03101	8.98e-29	1.36128e-24	0.221658	165	225
ITPA	1.82837	1.03167	1.06e-10	1.491e-06	1.77224	225	227
PAPSS2	0.969736	1.37657	0.0032859	1	0.704457	221	232
ATIC	3.49126	2.98909	0.0195882	1	1.168	232	232
AEBP1	1.43293	0.514661	5.34e-07	0.00709739	2.78423	222	232
AIG1	0.336515	0.533637	0.0343061	1	0.630607	139	163
SNX6	1.48876	1.39077	0.356789	1	1.07046	231	232
NUP107	0.294739	0.141459	1.23e-07	0.00165607	2.08355	228	232
GMFB	0.716417	1.09672	1.27e-06	0.0167221	0.653237	213	225
GPD1	6.69425	63.1261	3.38e-61	5.29916e-57	0.106046	217	232
SDHC	2.09578	5.19983	4.33e-08	0.000587841	0.403048	196	232
FGL2	0.66166	0.428217	0.00775369	1	1.54515	204	206
ASPN	22.1175	18.9027	0.628242	1	1.17007	226	232
LRRC47	1.51367	1.74223	0.0456382	1	0.868816	231	232
C12orf10	2.04589	2.83408	0.083463	1	0.721889	226	232
USP5	2.26701	2.06148	0.147697	1	1.0997	232	232
SLC25A11	7.3706	21.8485	2.02e-46	3.12878e-42	0.33735	231	232
GADD45GIP1	0.601833	1.81318	9.6e-10	1.33498e-05	0.331922	187	229
ARID1B	0.00649983	0.00523129	0.466983	1	1.24249	106	126
SLC31A1	0.099117	0.187067	0.000431937	1	0.529847	98	124
TMEM2	0.156408	0.0142182	4.51e-17	6.61752e-13	11.0006	214	80
TIMM9	2.60826	4.63499	6.69e-14	9.63761e-10	0.562731	217	232
LUC7L	0.125091	0.0952761	0.0035556	1	1.31293	197	187
TBC1D10A	0.0177425	0.133189	1.17e-33	1.78671e-29	0.133213	115	211
NPEPPS	4.20793	4.0265	0.41745	1	1.04506	232	232
TRMT1L	0.0376608	0.0714979	0.0471643	1	0.52674	161	170
NMI	0.452898	0.108788	2.07e-21	3.08948e-17	4.16312	227	182
USP24	0.10967	0.143179	0.010292	1	0.765965	219	232
PPP1R18	0.1991	0.0482976	0.000842022	1	4.12235	197	48
HNF4A	0.13407	0.358064	9.67e-13	1.38387e-08	0.37443	151	216
AP3B1	1.82627	1.5328	0.026714	1	1.19146	230	232
HSD17B4	9.52333	11.0084	0.0931824	1	0.865098	231	232
FAM107B	0.290307	0.290705	0.988654	1	0.998629	206	221
HLA-B	8.46922	1.35169	2.85e-21	4.25135e-17	6.26563	225	212
TRIP4	0.0769489	0.0135716	0.000857552	1	5.66987	157	62
EIF3F	27.2066	37.263	0.0273351	1	0.730122	231	232
THOP1	0.367475	0.277065	0.00230684	1	1.32632	231	232
SYNE3	0.0450182	0.0180597	2.03e-09	2.80972e-05	2.49275	199	167
RNF170	0.270646	0.421298	0.0353751	1	0.642408	174	200
YIPF6	0.166801	0.135192	0.0803702	1	1.23381	158	163
DPP4	8.59109	25.1858	2.94e-28	4.45263e-24	0.341109	231	232
HBS1L	0.118091	0.143008	0.52358	1	0.825762	217	230
BCAP31	6.47715	6.15129	0.705749	1	1.05297	231	232
NDUFA7	1.24193	18.4059	6.24e-48	9.68074e-44	0.0674747	129	230
ZEB2	0.0116714	0.00470362	0.004195	1	2.48136	136	58
DNAJC17	0.332831	0.202362	0.0681376	1	1.64473	166	173
ARRB1	0.575893	0.542894	0.832871	1	1.06078	226	232
GDI2	20.7277	26.605	1.38e-07	0.00185569	0.779091	232	232
DCAKD	0.23674	0.475998	2.55e-06	0.0333514	0.497356	215	230
C7	1.54135	1.49754	0.865788	1	1.02926	230	232
UEVLD	0.0948792	0.100941	0.809179	1	0.939946	175	208
MYO6	1.66902	5.28849	3.12e-61	4.89185e-57	0.315594	231	232
IVD	1.3997	8.29582	1.99e-55	3.10778e-51	0.168723	227	232
ARHGEF17	0.10674	0.0603639	2.09e-11	2.96007e-07	1.76828	217	229
BUB3	2.30187	1.80964	0.0355667	1	1.272	228	232
TEX10	0.246903	0.0933505	0.0192774	1	2.6449	206	150
CPD	0.108193	0.0740897	0.0391689	1	1.4603	214	230
BAG5	0.396314	0.492438	0.148501	1	0.804801	216	218
SQSTM1	1.06581	0.210456	0.0542462	1	5.06428	203	186
PHIP	0.0631864	0.050322	0.171068	1	1.25564	207	202
MTPN	9.71347	6.46394	7.02e-07	0.00930712	1.50272	232	232
VPS45	0.32293	0.414647	0.000290105	1	0.778807	231	232
RPL6	3.96407	2.4206	8.61e-07	0.0113798	1.63763	230	230
CHCHD5	0.430345	1.16853	4.35e-18	6.41712e-14	0.368277	146	227
CMPK2	0.425845	0.0949642	2.22e-09	3.07026e-05	4.48427	189	172
PSMC6	2.4861	3.2431	1.7e-05	0.217532	0.76658	232	232
CAB39L	0.343447	0.429656	0.0264127	1	0.799354	206	228
RASSF4	0.0530078	0.0201678	0.000151063	1	2.62835	120	110
RPS18	1.0235	0.653866	0.0403872	1	1.5653	201	197
WTAP	0.54087	0.295725	0.0827433	1	1.82896	187	171
LRRK2	0.0739712	0.00423435	1.9e-20	2.82834e-16	17.4693	201	95
SIRT2	0.205463	0.185837	0.469107	1	1.10561	215	229
MAPKAPK2	0.285546	0.133388	4.32e-13	6.1979e-09	2.14072	224	215
PCYT2	0.413574	1.75354	2.74e-51	4.26234e-47	0.235851	208	232
SLC35E1	0.133421	0.0364774	2.29e-12	3.27149e-08	3.65762	182	126
VAMP3	3.74752	3.86536	0.571186	1	0.969515	229	228
DCAF7	0.614425	0.995666	0.0025872	1	0.6171	224	231
SCOC	0.445762	1.44074	6.77e-19	1.00162e-14	0.309399	175	208
NBN	0.170589	0.175877	0.782143	1	0.969934	218	229
PPP2R5C	0.150944	0.147606	0.887179	1	1.02261	158	159
SORBS2	1.29543	2.0989	1.19e-06	0.0156771	0.617196	226	232
PLBD1	0.502426	0.677075	0.0502021	1	0.742054	218	221
TRIM25	2.81856	1.45241	1.38e-06	0.0181525	1.94061	231	232
NPC1	0.0880074	0.0143344	9.47e-05	1	6.1396	200	144
PFDN6	2.49182	2.30095	0.447743	1	1.08295	230	231
MPO	6.44987	0.250338	0.00423133	1	25.7646	231	230
UBAC2	0.138624	0.0505945	0.000151693	1	2.73991	165	119
OS9	0.334204	0.099753	8.6e-06	0.111086	3.35032	206	183
GBAS	2.82324	5.49726	4.4e-09	6.05792e-05	0.513572	229	232
CDKN1B	0.096143	0.055445	0.000356945	1	1.73402	135	137
SMIM15	2.36957	0.629724	2.74e-06	0.0358091	3.76288	146	60
AGL	1.31965	0.688069	9.68e-12	1.37592e-07	1.91791	231	232
MTHFD1L	0.135377	0.0309663	2.81e-06	0.0367211	4.37175	177	84
KIAA0319L	0.0451231	0.112392	0.00295672	1	0.40148	176	207
TYMP	25.438	1.91552	4.65e-28	7.03917e-24	13.2799	232	232
SNW1	0.243393	0.0908246	0.000305343	1	2.67981	211	201
DHX57	0.0122742	0.012146	0.983924	1	1.01055	161	135
ADAM10	0.476372	0.945759	7.33e-32	1.11643e-27	0.503693	231	232
CRLF3	0.0730106	0.0103361	5.9e-06	0.0764699	7.06364	166	74
AP2A2	2.37771	3.83307	4.58e-24	6.87962e-20	0.620315	232	232
LRP1	0.327411	0.247377	0.00322072	1	1.32353	231	232
B3GAT3	0.248244	0.0515054	0.0541116	1	4.81978	172	167
POLR1C	0.602131	0.609099	0.943002	1	0.98856	210	226
TPCN1	0.135391	0.499797	3.43e-12	4.89289e-08	0.270893	214	227
DDAH2	2.6416	7.00678	2.84e-23	4.25915e-19	0.377007	229	232
CD55	0.145651	0.119903	0.325077	1	1.21474	139	157
DHRS1	0.434493	0.963318	1.85e-18	2.73337e-14	0.451038	205	230
MRPS30	0.191375	1.36971	0.0529142	1	0.139719	127	218
PLEC	8.45324	4.05634	2.92e-23	4.37883e-19	2.08396	232	232
JMJD6	0.169106	0.0458905	1.12e-14	1.6221e-10	3.68498	196	132
FABP1	7.05349	225.925	1.5e-43	2.31555e-39	0.0312204	102	229
PROC	0.154892	0.150788	0.884532	1	1.02721	159	183
CDH2	0.683628	0.817506	0.0189642	1	0.836237	221	231
XPO1	1.99412	1.3589	7.28e-07	0.00964673	1.46745	232	232
FKBP7	0.353706	0.170344	0.000123926	1	2.07643	212	201
SCRN3	0.658006	0.373566	0.00182978	1	1.76142	205	218
TALDO1	20.2439	21.3283	0.433638	1	0.94916	232	232
NUDC	2.54799	2.08297	0.0672714	1	1.22325	228	232
ACAD8	0.744156	4.86834	2.73e-64	4.28774e-60	0.152856	215	232
MTRR	0.0445756	0.0215813	0.00423195	1	2.06547	119	125
RAPGEF6	0.00829535	0.00601091	0.599178	1	1.38005	120	29
CMC2	0.220034	0.778163	6.47e-18	9.53419e-14	0.28276	103	209
NF2	0.132349	0.208197	0.212754	1	0.635691	199	211
TBC1D1	0.160622	0.112806	0.193103	1	1.42387	189	224
THYN1	0.437437	0.539004	0.00281609	1	0.811566	225	229
HNRNPM	11.0806	8.22381	7.53e-08	0.00101753	1.34738	231	232
BCAR1	0.123959	0.178173	0.0555536	1	0.695726	193	212
TWF1	2.44086	3.16895	0.0567066	1	0.770244	230	232
RPTOR	0.0956144	0.0789041	0.265938	1	1.21178	218	228
KRT10	1.68686	2.54107	0.0237888	1	0.663838	232	229
FAM129B	2.20583	1.52309	3.6e-07	0.00480348	1.44826	232	232
TSTD1	1.92289	4.80469	1.41e-34	2.15617e-30	0.400211	214	232
HSPB8	2.72661	0.681939	6.64e-24	9.97062e-20	3.99832	217	175
DFFA	0.247031	0.425122	7.16e-11	1.00884e-06	0.581084	213	232
THEMIS2	0.154247	0.0123817	8.81e-10	1.22618e-05	12.4577	203	26
MPG	0.156147	0.05228	2.46e-06	0.0321916	2.98675	194	137
RNPEP	5.0188	6.1747	0.00573634	1	0.812801	232	232
DNAJC2	0.109904	0.083414	0.535732	1	1.31758	120	118
STX4	0.676121	0.679966	0.971569	1	0.994344	208	230
VPS11	0.339552	0.167214	0.198028	1	2.03064	224	232
SSR3	2.19654	2.5304	0.561457	1	0.868064	209	222
CRNKL1	0.119892	0.102243	0.251857	1	1.17262	220	221
USP15	0.690253	0.4207	0.0632029	1	1.64073	231	232
FMO1	2.23453	22.333	1.65e-51	2.56757e-47	0.100055	204	231
CLCC1	0.0944047	0.0362128	7.03e-10	9.79841e-06	2.60694	204	176
GRWD1	0.0621969	0.0267956	1.04e-08	0.000142438	2.32116	174	133
ADRBK1	0.273888	0.0664065	2.4e-06	0.0314112	4.12442	220	192
CHTOP	0.138101	0.0495473	8.96e-09	0.000122824	2.78726	144	85
MARCKS	0.341785	0.130774	6.59e-05	0.824541	2.61356	199	181
SNAP23	3.3454	2.83328	0.0451056	1	1.18075	229	232
MCU	1.59283	1.13985	0.00990597	1	1.3974	228	232
CRYZL1	0.218212	0.355879	3.41e-07	0.00455201	0.613163	203	228
PIGT	0.34907	0.407311	0.269979	1	0.857013	217	215
CTSL	0.448049	1.56808	1.32e-26	1.99399e-22	0.285731	225	232
GNE	0.260011	0.054463	3.8e-17	5.5803e-13	4.77408	207	170
GGCX	0.114533	0.0989556	0.181005	1	1.15742	209	221
UTP15	0.0629869	0.0202816	9.86e-15	1.42852e-10	3.10562	187	169
PTPRG	0.169118	0.24476	0.0153982	1	0.690955	192	231
SYAP1	0.341674	0.31254	0.546494	1	1.09322	184	203
HSPA8	56.5563	79.4668	2.02e-11	2.86153e-07	0.711698	232	232
DSG2	2.01959	4.11201	2.23e-06	0.0292063	0.491143	212	232
SUCLG2	9.21022	116.175	6.97e-85	1.09889e-80	0.0792786	231	232
TENC1	0.339704	1.01547	2.18e-35	3.33627e-31	0.334527	211	231
BLOC1S1	1.00273	1.84926	6.35e-12	9.04176e-08	0.542236	221	231
SRPRB	2.40728	1.99833	0.0471299	1	1.20464	231	232
RBPJ	0.0595044	0.0217771	0.000195411	1	2.73243	169	73
GRHPR	8.11619	51.2341	3.36e-52	5.23085e-48	0.158414	232	232
C2orf43	0.115554	0.102479	0.331016	1	1.12758	169	169
FNBP1L	0.377282	0.369317	0.929138	1	1.02157	204	231
COX7A2L	3.41145	12.9132	1.32e-24	1.98541e-20	0.264184	166	232
COG2	0.114157	0.106547	0.482041	1	1.07142	211	229
ATP6V1B2	4.79558	27.2431	1.33e-53	2.07294e-49	0.17603	232	232
TBL1XR1	0.522473	0.227729	9.67e-07	0.0127663	2.29427	223	228
FAM114A2	0.470501	0.321222	3.78e-05	0.477603	1.46472	231	232
C2	0.79427	0.677986	0.0885283	1	1.17151	232	232
PARVB	0.818157	1.25936	0.0165094	1	0.649663	208	219
TRAF6	0.260951	0.190655	0.038462	1	1.3687	205	215
STK38	0.256369	0.164696	0.000378153	1	1.55662	195	205
PPP2R5D	0.4392	0.39001	0.180957	1	1.12613	225	229
PGLYRP2	1.69597	0.831259	0.0447977	1	2.04025	232	232
IGFBP3	3.47138	0.537928	1.17e-05	0.150403	6.45325	222	192
RPS6	20.8132	10.3976	3.01e-13	4.32266e-09	2.00173	231	232
FRK	0.150967	0.307791	2.77e-08	0.000377052	0.490486	189	230
GRAP2	0.0612274	0.0019831	8.12e-07	0.0107403	30.8745	117	14
CTSH	0.479732	2.42132	2.68e-27	4.0527e-23	0.198128	205	230
MXRA5	0.123875	0.0136709	2.7e-06	0.035289	9.06118	165	56
ZNF384	0.045396	0.0313494	0.248306	1	1.44807	125	47
AAGAB	0.113263	0.118108	0.841536	1	0.958973	137	157
ITGA5	0.253026	0.0633582	2.18e-15	3.17212e-11	3.99358	226	182
SAMD9	0.0297059	0.00340491	1.93e-10	2.70895e-06	8.72441	166	48
AKR1C3	7.23043	11.7778	3.87e-05	0.488781	0.613902	232	232
MRPS34	0.0670099	0.216233	4.78e-13	6.85595e-09	0.309897	113	193
GOLM1	0.226724	0.283822	0.104656	1	0.798827	161	202
RAB6B	1.75489	0.713641	4.54e-10	6.3451e-06	2.45907	144	78
ATM	0.126884	0.0526737	9.14e-11	1.28636e-06	2.40886	219	222
THOC2	0.169964	0.191384	0.195402	1	0.888078	228	232
PEX16	0.0368106	0.0503778	0.261812	1	0.730692	125	148
TMEM223	0.0944059	0.169833	5.36e-06	0.0695514	0.555876	175	223
HNRNPA0	2.31461	1.24559	5.13e-19	7.59343e-15	1.85824	231	232
COL12A1	5.72526	3.42308	0.000365014	1	1.67255	232	232
LONP1	4.55779	10.0132	4.65e-18	6.85643e-14	0.45518	231	232
GHITM	0.611434	0.83418	0.0208311	1	0.732976	152	159
SRSF1	40.2218	36.941	0.0757338	1	1.08881	231	232
NDRG1	47.6706	9.73713	8.76e-23	1.31199e-18	4.89575	232	232
TOR1A	0.441219	0.313717	0.053488	1	1.40643	220	222
RRBP1	4.70462	4.42966	0.475296	1	1.06207	231	232
ME3	0.189301	0.854705	5.54e-20	8.23244e-16	0.221481	184	232
BMP2K	0.222794	0.147151	0.0381603	1	1.51405	178	116
SLC22A5	0.0356025	0.74545	2.13e-60	3.33771e-56	0.0477597	114	221
CHMP5	1.08274	1.53127	9.51e-05	1	0.707089	223	228
ARL6IP6	0.13186	0.0633663	2.04e-06	0.0267403	2.08091	158	143
CTBP2	0.524486	0.623293	0.00793598	1	0.841476	218	232
RPN1	9.86479	9.1007	0.203426	1	1.08396	232	232
SBSPON	0.641975	0.597163	0.509193	1	1.07504	193	232
MSTO1	0.0603464	0.0389412	0.0294209	1	1.54968	126	156
ACY3	0.537761	2.86093	4.07e-35	6.22629e-31	0.187967	190	229
GNAI2	9.92184	6.44977	1.61e-09	2.23291e-05	1.53832	232	232
AGA	0.400064	0.475494	0.277935	1	0.841365	213	232
CNOT6L	0.0133	0.0128797	0.829956	1	1.03263	123	122
GAL3ST1	0.35771	0.222455	0.0158571	1	1.60801	169	195
SLC30A5	0.0480799	0.0195328	0.000265936	1	2.46149	169	170
COPE	3.92186	4.41278	0.0447012	1	0.88875	232	232
TMED1	0.943243	0.998521	0.549357	1	0.94464	209	228
SARS	2.50683	2.09197	0.00415409	1	1.19831	231	232
TBC1D4	0.12185	0.322471	9.82e-16	1.43235e-11	0.377865	203	231
SYK	0.276296	0.0995671	0.00330249	1	2.77497	204	195
VASN	0.212567	0.195764	0.416692	1	1.08583	221	228
NIT1	4.20593	4.40211	0.704511	1	0.955434	231	232
CA3	0.194417	0.12191	0.15195	1	1.59475	139	147
C1GALT1	0.0267453	0.0345843	0.238758	1	0.773336	102	147
NF1	0.0569676	0.0428094	0.335114	1	1.33073	203	214
RAE1	0.719534	0.686341	0.581984	1	1.04836	224	231
U2AF2	3.65531	2.94586	0.000221488	1	1.24083	231	232
INTS4	0.035739	0.0237462	0.0294821	1	1.50504	177	119
OAF	0.0993431	0.174236	0.164044	1	0.570165	112	162
ANXA11	8.53715	9.29159	0.228447	1	0.918804	232	232
ACOX3	0.253681	0.463269	1.97e-06	0.0258365	0.54759	222	231
RABIF	3.69181	3.82961	0.751362	1	0.964017	195	211
SEPSECS	0.251231	0.592117	1.5e-16	2.1954e-12	0.424293	206	231
BASP1	0.473949	1.03425	0.000124246	1	0.458252	190	231
NID2	5.3161	3.22414	1.92e-12	2.74445e-08	1.64884	231	232
NDUFB10	1.95433	19.3485	3.47e-70	5.46109e-66	0.101007	224	232
PGK1	587.202	220.303	1.6e-17	2.3536e-13	2.66543	232	232
CEP250	0.0332229	0.0130941	0.0666357	1	2.53725	180	90
CD93	0.378582	0.0801311	1.8e-24	2.70612e-20	4.72454	228	210
HAX1	0.111398	0.261799	9.26e-06	0.119454	0.42551	172	220
OSBPL3	0.0747196	0.0206525	4.06e-06	0.0528531	3.61794	177	133
COMMD8	0.33206	0.622492	2.38e-15	3.46171e-11	0.533437	217	228
MYOF	3.57664	1.31686	7.75e-21	1.15475e-16	2.71602	231	232
EEF2	23.0135	16.0188	1.77e-07	0.00237446	1.43665	232	232
DECR2	1.24658	3.502	7.76e-24	1.16501e-19	0.355963	215	231
ALG11	0.235428	0.367082	0.000342656	1	0.641351	207	230
PPAP2B	2.68561	1.30208	3.13e-05	0.39679	2.06256	224	231
CDV3	0.434265	0.0849459	1.57e-11	2.22673e-07	5.11225	190	148
RPS14	10.1332	6.96777	2.12e-07	0.00284016	1.4543	231	232
RPAP1	0.0475799	0.025245	0.00485572	1	1.88472	169	118
EXOC6B	0.239139	0.201561	0.256066	1	1.18643	215	232
PAIP1	3.01933	2.43462	0.0206937	1	1.24017	231	232
ZADH2	0.157454	1.02529	3.97e-27	6.00185e-23	0.15357	179	230
WDR82	0.406889	0.497991	0.380065	1	0.817061	212	214
HNRNPH1	9.60367	7.23373	4.16e-07	0.00554195	1.32762	231	232
FETUB	0.171529	0.144324	0.327528	1	1.1885	183	171
CD14	1.60211	0.69616	7.67e-08	0.00103622	2.30135	231	230
DYNC1I2	1.75909	1.82095	0.544306	1	0.966031	229	232
ANKRD13A	0.631951	0.227509	5.65e-14	8.14221e-10	2.77769	225	214
DNAJC7	0.272473	0.562395	2.17e-10	3.04408e-06	0.484487	203	226
LXN	4.129	2.81062	0.0003642	1	1.46907	225	186
PAPOLA	0.176613	0.135698	0.650807	1	1.30152	190	166
OSBP	0.75445	1.10555	7.37e-11	1.03814e-06	0.682422	228	232
TTC38	2.06037	8.44018	3.99e-46	6.17732e-42	0.244114	229	232
STT3A	2.92827	1.50152	1.64e-08	0.000224024	1.9502	231	232
MSH3	0.53601	0.399406	0.0428989	1	1.34202	202	197
EPT1	0.0537597	0.0280126	0.000136015	1	1.91912	157	99
NUP43	0.319025	0.229707	2.65e-05	0.336815	1.38884	218	226
ASRGL1	2.03223	4.38791	5.77e-11	8.13801e-07	0.463142	198	232
HLA-DQB1	0.965179	0.274938	1.62e-07	0.00217469	3.51054	175	139
EFNB1	0.0814409	0.176651	0.00131091	1	0.461027	182	227
VTA1	1.08764	1.07275	0.819665	1	1.01388	232	232
MS4A6A	0.070185	0.00522043	8.24e-10	1.14717e-05	13.4443	120	8
RAB31	1.1753	0.18802	4.36e-17	6.39917e-13	6.25093	199	62
EXOSC10	0.142928	0.109404	0.487094	1	1.30642	214	220
RTF1	0.052056	0.0225535	0.000691659	1	2.30811	143	111
TERF2IP	0.119777	0.14817	0.331084	1	0.808377	172	162
VBP1	1.10111	0.837184	0.000159182	1	1.31526	226	231
UPP1	0.563166	0.0442417	0.0141289	1	12.7293	167	55
ADCK4	0.0709734	0.100957	0.167768	1	0.703007	168	200
CDC42BPB	0.38906	0.575988	9.27e-05	1	0.675465	228	232
ZBTB8OS	0.253849	0.350919	0.0982032	1	0.723385	198	191
AP2S1	7.50538	13.2382	7.36e-17	1.07853e-12	0.56695	231	232
PFKFB2	0.245721	0.918726	2.55e-12	3.64089e-08	0.267458	140	230
POLR2A	0.246022	0.186976	0.0182809	1	1.31579	223	232
FBXL8	0.188762	0.0894935	6e-06	0.077748	2.10922	182	123
SCP2	3.41231	7.30391	9.92e-17	1.45268e-12	0.467189	230	232
CACYBP	3.65597	4.28678	0.0405404	1	0.852847	230	232
ACO1	3.37635	23.185	3.24e-54	5.05278e-50	0.145626	232	232
IFIT5	0.337621	0.0601772	7.43e-07	0.00984252	5.61045	190	132
POLR2G	0.464322	0.21343	0.0022107	1	2.17552	193	175
CD46	0.296426	0.63302	2.6e-14	3.7544e-10	0.468273	204	229
GLRX	35.0288	65.4782	3.54e-13	5.08132e-09	0.534969	230	232
NDUFS4	1.03962	9.3472	7.83e-77	1.23346e-72	0.111223	222	232
SNX18	0.25601	0.310082	0.0035157	1	0.825621	225	229
KRT18	51.5419	52.2048	0.891723	1	0.987303	229	232
LSM1	0.609041	0.875648	0.00202642	1	0.695531	199	225
ENPP3	3.16436	0.59859	3.82e-17	5.60929e-13	5.28636	220	216
UNC13D	0.0986375	0.00231315	0.00563469	1	42.6421	121	7
NAMPT	5.13852	1.66548	1.68e-09	2.32949e-05	3.08531	232	232
PRKACB	0.595644	0.81715	5.49e-07	0.00729566	0.728929	221	232
PLEKHA1	0.302629	0.154415	1.63e-06	0.0214166	1.95984	213	225
LRBA	0.309202	0.647456	7.96e-28	1.20475e-23	0.477565	227	232
COPA	2.95374	2.71972	0.160779	1	1.08605	231	232
GLDC	0.230633	3.72963	1.71e-60	2.67991e-56	0.061838	133	228
PROSC	2.26162	5.47979	5.98e-38	9.1781e-34	0.412721	231	232
MPDZ	0.0135175	0.0590742	4.44e-09	6.11255e-05	0.228822	86	220
STIM1	0.435623	0.188956	5.7e-15	8.27127e-11	2.30542	229	230
SLMAP	0.130779	0.235386	0.000503321	1	0.555594	214	229
PSMA1	5.24696	6.35571	0.00764844	1	0.825551	231	232
TRIP6	0.662979	0.597232	0.64642	1	1.11009	225	232
MAP2K4	0.469875	0.438657	0.521	1	1.07117	215	231
GATAD2B	0.0332366	0.0161329	3.09e-05	0.391843	2.06018	163	109
FBXO6	0.0669019	0.0164431	0.00449053	1	4.0687	139	53
PRPF6	1.78562	3.32262	2.52e-08	0.0003433	0.537412	228	232
MGMT	0.260074	0.378657	0.00105725	1	0.686833	187	224
MRC1	0.401482	0.264551	0.00209472	1	1.5176	225	227
RRP12	0.127263	0.0512533	0.00620167	1	2.48302	212	185
DEF6	0.0927756	0.00310155	2.48e-08	0.000337925	29.9126	149	16
RANGAP1	0.810905	0.745202	0.275575	1	1.08817	231	232
CBFB	0.30264	0.0383691	4.4e-15	6.38968e-11	7.88761	207	99
RAP2C	0.341208	0.233191	0.0456331	1	1.46321	197	152
AFM	1.1986	0.808338	8.82e-05	1	1.48279	232	232
UFD1L	1.29419	1.64454	0.000173386	1	0.786964	230	232
GDA	4.41704	12.5178	2.59e-18	3.82336e-14	0.35286	210	231
STAT5B	1.70435	1.26712	0.0908577	1	1.34506	226	229
LRRFIP2	0.360131	0.523514	0.00530409	1	0.687911	218	229
EIF2D	0.246276	0.302761	0.235391	1	0.813434	183	207
MUC1	1.39082	2.57924	1.98e-05	0.252628	0.539236	179	229
DHRS3	1.06661	0.978433	0.570548	1	1.09013	192	228
FN3KRP	1.75115	1.41116	0.00293431	1	1.24093	232	231
G3BP1	1.92934	1.26686	1.02e-06	0.0134589	1.52294	231	232
TBK1	0.308626	0.20127	0.00160929	1	1.53339	223	223
NSDHL	0.407349	0.835938	0.00431692	1	0.487296	223	231
TSPO	1.65549	0.933637	0.0027317	1	1.77316	204	196
TIMP3	0.466237	1.40861	4.01e-20	5.96287e-16	0.33099	207	231
ACAA1	2.10391	26.2444	6.15e-62	9.64751e-58	0.0801658	230	232
HIBADH	9.53949	41.1471	4.75e-52	7.39385e-48	0.231839	231	232
ENO2	126.457	33.685	3.82e-30	5.80449e-26	3.7541	232	229
RCN1	5.11201	1.99764	1.74e-13	2.50212e-09	2.55903	231	232
ABHD10	5.73286	32.4993	5.12e-63	8.03482e-59	0.176399	230	232
EPS8L2	1.38796	2.24735	4.18e-11	5.903e-07	0.617599	224	232
APOE	10.2237	7.15008	0.255293	1	1.42987	232	232
CRAT	0.946547	4.52956	1.09e-67	1.71457e-63	0.208971	228	232
VPS25	1.42337	1.83088	0.00190719	1	0.777421	227	232
ADH5	8.35028	18.351	1.3e-31	1.97925e-27	0.45503	232	232
ACBD3	0.730638	0.53768	0.00652608	1	1.35887	230	232
CAPN6	0.0253255	0.0278849	0.869597	1	0.908217	150	113
VPS16	0.573336	0.40253	5.76e-05	0.722362	1.42433	228	232
GTF2F2	0.085678	0.0430457	9.09e-06	0.117306	1.99039	183	151
OARD1	0.392498	0.881115	2.72e-09	3.75659e-05	0.445456	205	206
BIN1	0.924328	2.72016	1.02e-38	1.56723e-34	0.339806	227	232
NDC1	0.0947606	0.0654767	0.0336516	1	1.44724	116	103
LOC391322	1.79339	3.82752	3.78e-05	0.477603	0.468551	98	138
VWA1	11.9049	5.10179	9.38e-17	1.37379e-12	2.33348	231	232
SNX1	2.14529	2.61387	0.000814523	1	0.820736	231	232
ABCF3	0.187752	0.323863	2.94e-07	0.0039296	0.579728	219	232
TXN2	1.43282	8.28926	1.11e-53	1.73016e-49	0.172853	222	232
EFEMP1	5.02936	2.07103	0.000797651	1	2.42843	226	225
PFKM	7.46612	9.03923	0.00852893	1	0.825969	232	232
COMMD9	0.606409	1.18334	4.47e-18	6.59325e-14	0.512456	223	232
SLFN11	0.0368226	0.00276905	4.48e-07	0.00596467	13.2979	118	10
SBF1	0.0893536	0.0663904	0.0142242	1	1.34588	208	225
GLRX3	1.33969	1.03186	0.00209269	1	1.29832	230	232
SCRN1	1.24296	1.04621	0.203723	1	1.18807	227	232
ICAM1	3.99416	1.12632	2.01e-24	3.02143e-20	3.54621	231	232
CXorf38	0.162698	0.0468488	9e-10	1.25226e-05	3.47284	182	130
MANBA	0.0653838	0.107874	0.0989218	1	0.606111	198	210
TMEM50B	0.13921	0.176248	0.0517791	1	0.789854	128	142
CD36	2.25152	0.112044	2.01e-19	2.98083e-15	20.095	213	110
NUCB1	3.01399	3.35992	0.0870479	1	0.897042	231	232
ARPC1B	2.58918	1.28116	1.03e-12	1.47383e-08	2.02096	232	232
MRPL12	1.57346	3.73808	2.37e-16	3.46684e-12	0.420927	207	232
TMF1	0.0447253	0.0389464	0.46228	1	1.14838	176	186
HDGFRP3	0.852608	1.62501	9.68e-08	0.00130583	0.524679	208	231
UBXN1	0.324267	0.41895	0.0556198	1	0.774	207	225
PAK1	0.262605	0.230961	0.0929129	1	1.13701	200	224
ALDH3A2	2.95968	10.5021	2.29e-36	3.50943e-32	0.281817	231	232
ARSB	0.239272	0.579571	3.96e-19	5.86397e-15	0.412843	218	231
CNN2	2.19486	3.34112	3.19e-11	4.51002e-07	0.656924	231	232
STXBP3	0.942922	1.32222	1.84e-05	0.235134	0.713135	231	232
ACOT11	0.13399	0.502029	2.57e-22	3.84395e-18	0.266896	144	230
TMED2	2.75965	1.79599	5.57e-06	0.0722262	1.53656	230	232
DAP3	0.521346	1.70872	7.71e-21	1.14887e-16	0.305109	219	232
DYNLL1	0.763274	0.694105	0.464253	1	1.09965	203	209
EEF1E1	3.11232	4.99373	7.12e-11	1.00328e-06	0.623245	229	232
SH3BP5L	0.0536774	0.00647418	8.71e-07	0.0115103	8.291	116	21
TFIP11	0.181429	0.121851	0.132432	1	1.48895	203	203
FAM98A	0.315649	0.806488	1.02e-17	1.50134e-13	0.391387	211	231
RPF2	0.0887209	0.0232076	9.36e-06	0.120735	3.82293	167	106
SLC3A1	0.676245	3.29111	9.01e-49	1.39862e-44	0.205476	208	230
TIAL1	0.503819	0.377539	0.191522	1	1.33448	214	224
COQ9	0.7725	3.55184	8.15e-55	1.27197e-50	0.217493	217	232
MTM1	0.320217	1.25745	8.29e-09	0.000113706	0.254656	210	232
ALDH5A1	1.06268	4.74219	7.55e-56	1.17969e-51	0.22409	223	232
EIF2B5	0.281734	0.227276	0.065217	1	1.23961	221	229
EFHD2	3.29959	1.39648	1.32e-12	1.88813e-08	2.36279	231	228
TBC1D15	0.375773	0.331928	0.0702492	1	1.13209	227	232
NUFIP2	0.0883475	0.0189219	2.22e-05	0.282895	4.66906	121	54
MYH9	69.168	54.71	3.73e-05	0.471472	1.26427	232	232
SEC61G	2.73116	2.23629	0.00577653	1	1.22129	226	232
RANBP9	0.135363	0.179171	0.184123	1	0.755495	157	166
CDIPT	2.52418	1.82074	3.81e-06	0.0496481	1.38634	230	232
RFTN1	0.18682	0.137963	0.00338324	1	1.35413	217	225
HEATR3	0.0371622	0.0193984	0.106926	1	1.91573	179	169
ARL2	1.13892	2.65644	1.82e-07	0.00244026	0.428738	219	232
KIF13B	0.217165	0.604428	2.1e-49	3.2613e-45	0.35929	227	232
ARF3	10.7254	28.5987	7.54e-12	1.07279e-07	0.375032	56	123
QSOX2	0.0234636	0.0180952	0.181025	1	1.29667	137	143
CNPY3	0.94746	0.503928	1.52e-09	2.10885e-05	1.88015	222	210
TM9SF1	0.304395	0.417217	0.00127267	1	0.729585	217	227
CPN1	0.0849281	0.0350206	0.0052988	1	2.42509	159	123
VPS51	0.110036	0.13495	0.0146072	1	0.815386	219	232
NDUFV2	2.28239	17.1596	2.94e-48	4.56229e-44	0.133009	231	232
UGGT1	1.56691	1.76684	0.0421403	1	0.886844	232	232
MICU1	0.0370879	0.0438471	0.437426	1	0.845846	133	150
PARVA	1.79991	2.68488	9.36e-15	1.35626e-10	0.670387	230	232
LSP1	0.710653	0.0975935	5.24e-13	7.51468e-09	7.28176	221	132
GPD1L	0.246651	1.62896	1.71e-47	2.65118e-43	0.151416	210	232
EIF3B	2.88164	1.97552	2.55e-06	0.0333514	1.45867	231	232
SSH3	0.458959	0.249044	4.68e-05	0.588978	1.84288	220	226
KIAA1429	0.0526396	0.0195805	0.00134951	1	2.68836	194	174
43715	4.11906	2.94929	6.35e-09	8.72045e-05	1.39663	231	232
POLB	0.067388	0.0813746	0.196678	1	0.82812	161	191
ORM1	207.793	171.332	0.150953	1	1.2128	232	232
THOC5	0.219026	0.184898	0.403349	1	1.18458	214	209
CIRBP	3.75777	6.21899	2.45e-14	3.53829e-10	0.604242	229	232
NOSIP	0.0961519	0.0674218	0.0223815	1	1.42613	128	117
COPS7B	0.621485	0.183587	5.11e-07	0.00679579	3.38523	192	172
FUCA1	1.11525	1.86465	5.55e-08	0.000751803	0.598104	232	232
CNRIP1	0.197497	0.215956	0.709053	1	0.914525	166	173
NUTF2	5.73995	5.57423	0.65476	1	1.02973	232	232
AARS	1.63401	1.935	0.00752497	1	0.844449	232	232
OSTF1	1.4353	0.411519	0.00158367	1	3.48781	217	209
NAP1L4	1.6917	1.82194	0.29338	1	0.928516	232	232
LOXL2	0.1807	0.0177563	5.9e-09	8.10778e-05	10.1767	206	15
RPL32	2.02481	1.4607	3.12e-05	0.395585	1.38619	230	229
ENSA	4.53953	7.10624	0.189815	1	0.638809	212	206
PRKAR2A	2.00934	4.18325	8.69e-32	1.32349e-27	0.480331	232	232
DCTPP1	0.745689	0.229524	2.58e-06	0.0337361	3.24885	218	196
GBF1	0.176223	0.162187	0.321375	1	1.08654	227	232
MECR	0.513332	0.494249	0.786339	1	1.03861	199	227
APOO	2.7517	9.38039	2.53e-36	3.87621e-32	0.293346	223	232
YWHAB	26.4702	23.3589	0.0484379	1	1.13319	232	232
FSTL1	0.0967088	0.00793901	3.24e-06	0.042282	12.1815	127	27
ECHS1	29.7667	397.603	1.93e-74	3.03936e-70	0.0748654	232	232
ERLIN2	3.81102	5.06013	3.75e-08	0.000509363	0.753147	231	232
SRP19	0.264434	0.347531	0.199251	1	0.760892	156	183
NDRG3	0.404808	0.299755	0.0711773	1	1.35046	207	223
RARS2	0.0525667	0.102568	5.23e-10	7.30317e-06	0.512506	164	223
PRKAA2	0.904638	1.55784	1.35e-07	0.00181629	0.580699	214	231
SCPEP1	0.223108	0.746926	2.93e-45	4.53095e-41	0.298701	222	232
ASCC3	0.166793	0.0280856	2.53e-10	3.5463e-06	5.93872	222	195
QKI	1.70326	1.28157	0.0541212	1	1.32904	229	230
PIP4K2B	0.288006	0.231675	0.0694992	1	1.24315	218	230
RMDN3	1.17561	1.09784	0.363418	1	1.07084	228	232
LAMB2	7.79964	4.22565	2.27e-15	3.30262e-11	1.84578	231	232
CD97	0.369138	0.161601	3.98e-11	5.62255e-07	2.28425	230	221
EXOSC7	0.156369	0.119704	0.0162371	1	1.3063	211	208
ANXA4	430.715	44.1166	2.59e-36	3.96788e-32	9.76311	232	232
GARS	0.772345	0.59937	0.0935575	1	1.28859	231	232
SEH1L	0.789841	0.948952	0.0391856	1	0.83233	227	232
MYEF2	0.716753	0.870816	0.0151057	1	0.823083	221	231
NCSTN	0.493706	0.396298	0.0326721	1	1.24579	231	231
RBM19	0.0923705	0.00255431	0.000236822	1	36.1626	127	42
YTHDC2	0.0777976	0.031978	3.88e-09	5.34664e-05	2.43285	197	182
SEC11A	2.61536	2.0833	0.00321448	1	1.2554	230	232
EEF1G	12.283	12.6684	0.609311	1	0.969577	232	232
PLCB2	0.0752089	0.0027447	0.0264939	1	27.4015	165	25
EEF1D	10.5228	14.3008	1.11e-06	0.0146287	0.735816	231	232
ACTN1	35.0882	40.604	0.0166153	1	0.864155	232	232
SORL1	0.198888	0.210818	0.658197	1	0.943414	222	232
MAN2B2	0.129414	0.29858	1.05e-08	0.000143797	0.433432	185	225
ALDH2	14.6565	134.831	4.56e-42	7.02787e-38	0.108703	230	232
UBE3A	0.200531	0.299234	2.84e-05	0.360453	0.670149	222	232
TPR	0.986729	0.906613	0.158238	1	1.08837	231	232
CFHR5	0.186189	0.454609	4.24e-06	0.0551666	0.409559	110	205
PSMC1	1.7458	2.26583	1.29e-05	0.165662	0.77049	232	232
PHYKPL	1.56785	0.8116	7.27e-11	1.02427e-06	1.9318	220	230
MATR3	2.86286	2.44276	0.00078209	1	1.17198	231	232
WDR47	0.0108262	0.00300457	5.17e-06	0.0671324	3.60325	124	86
INTS3	0.85356	0.798945	0.806295	1	1.06836	209	199
MFF	0.390418	0.426604	0.731316	1	0.915177	198	219
CORO1C	2.04065	1.35846	1.3e-08	0.00017784	1.50217	231	232
CTBS	0.432152	1.17066	5.63e-11	7.9428e-07	0.369152	222	232
PRPS1	2.5022	1.48588	5.01e-07	0.0066633	1.68399	230	232
TRA2B	8.27907	6.46481	9.57e-05	1	1.28064	231	232
CALCOCO1	0.0274162	0.0375435	0.372828	1	0.73025	87	122
S100A9	28.3879	12.4917	0.0567482	1	2.27253	200	219
IFI35	0.852205	0.476473	1.9e-05	0.24263	1.78857	226	220
LCP1	13.9609	4.59034	1.8e-09	2.49444e-05	3.04136	232	232
COL5A3	0.0473202	0.0123286	2.25e-11	3.18465e-07	3.83825	203	39
STAT2	0.310574	0.104717	2.26e-16	3.30638e-12	2.96584	230	222
AP5B1	0.0332436	0.0462867	0.212687	1	0.71821	121	91
PON1	3.07766	1.15287	0.0296686	1	2.66957	232	229
WDR45B	0.405335	0.46075	0.356476	1	0.879728	213	224
EMC8	0.157187	0.275263	7.11e-07	0.00942502	0.571041	199	221
KIAA1715	2.17414	1.0522	2.7e-09	3.72924e-05	2.06628	228	232
DHCR7	0.150374	0.174796	0.512405	1	0.860282	145	150
NAE1	0.650738	0.665701	0.831897	1	0.977523	230	232
HMHA1	0.120536	0.00942703	1.58e-10	2.21895e-06	12.7862	178	25
PYGL	7.48754	2.10558	1.97e-22	2.94751e-18	3.55605	232	232
SWAP70	4.04447	3.41201	0.135069	1	1.18536	227	232
43713	0.261231	0.0850775	8.25e-13	1.18157e-08	3.07051	211	163
BCCIP	0.240643	0.17023	0.0517242	1	1.41363	194	195
UBA6	0.999774	0.538234	1.76e-11	2.49498e-07	1.85751	231	232
PRKCI	0.197782	0.124316	0.0258014	1	1.59096	204	224
TSPAN9	0.849924	1.40198	2.64e-09	3.64742e-05	0.60623	217	231
AAK1	0.224471	0.25705	0.25539	1	0.873258	222	230
ANGPTL2	0.832508	0.0703143	2.27e-09	3.13918e-05	11.8398	222	121
MFAP4	6.30068	1.84888	0.000224251	1	3.40783	207	213
LBR	0.413089	0.17521	1.13e-05	0.145318	2.35768	208	180
DARS	5.59327	3.40674	2.23e-13	3.20518e-09	1.64182	232	232
HDAC6	0.377703	1.21839	2.34e-46	3.62396e-42	0.310002	225	232
DNAJC5	0.688989	0.509533	0.0843529	1	1.3522	182	184
PPIP5K2	0.105386	0.0411497	0.0387748	1	2.56104	208	170
TMSB10	170.483	21.1526	1.22e-13	1.7557e-09	8.05967	230	221
SLC25A3	14.1002	23.2195	2.23e-06	0.0292063	0.607257	232	232
A1BG	10.035	6.27208	0.000249456	1	1.59995	232	232
CYB561D2	0.484583	0.901959	2.09e-05	0.266517	0.537256	119	144
ARFRP1	0.165325	0.180541	0.68428	1	0.915718	172	180
PI4K2A	0.284689	0.160313	0.000205923	1	1.77583	220	231
USP11	0.0368704	0.0180002	0.0255799	1	2.04833	118	87
DDC	2.47348	32.2549	3.47e-44	5.35941e-40	0.0766855	192	230
TNS1	2.51195	2.82371	0.0371484	1	0.88959	231	232
FGGY	0.713801	0.890585	0.174206	1	0.801496	212	231
PPP3CA	0.580772	0.474692	0.0034691	1	1.22347	226	228
OPLAH	0.728085	1.81931	1.93e-30	2.93399e-26	0.400199	224	232
RPL30	13.1266	10.5544	0.000553969	1	1.24372	232	232
APOC1	18.1084	6.71185	6.14e-05	0.769096	2.69797	232	230
TXN	180.955	338.398	1.97e-18	2.90989e-14	0.534739	232	232
HTATIP2	1.14451	0.560302	5.54e-06	0.0718427	2.04266	216	218
SNRPA	1.24127	0.837104	1.81e-07	0.00242721	1.48282	228	232
CBX3	9.50315	7.20389	0.000155158	1	1.31917	229	232
MAP1B	0.717208	0.2969	9.99e-07	0.0131828	2.41566	229	232
FABP4	0.65679	0.93086	0.0754845	1	0.705574	105	209
HNRNPA1	33.2221	21.5567	9.65e-09	0.000132195	1.54115	212	201
FKBP9	1.88239	2.23	0.0431247	1	0.844119	230	232
EMC7	0.55797	0.965179	6.74e-10	9.39489e-06	0.5781	217	232
AK1	3.97929	9.81816	1.23e-21	1.83701e-17	0.405299	232	232
MAN1B1	0.0733491	0.0609507	0.148214	1	1.20342	193	195
IWS1	0.0448509	0.0365352	0.253156	1	1.22761	172	176
PIK3CD	0.0142524	0.000865603	6.29e-07	0.00834935	16.4653	126	20
FKBP4	2.46869	4.35205	6.47e-22	9.67006e-18	0.567248	231	232
TTC19	0.212324	0.41474	4.62e-07	0.00614968	0.511946	162	213
GALK2	0.589414	1.08931	5.18e-06	0.0672519	0.541087	218	230
FAM120B	0.168574	0.200303	0.121476	1	0.841594	176	218
CNOT3	0.331804	0.15939	0.00896807	1	2.08171	200	180
RAI14	0.779567	1.4622	3.46e-17	5.08136e-13	0.533148	229	232
WDR61	1.0191	1.16522	0.0791934	1	0.8746	227	232
ABCB8	0.0990391	0.473727	4.49e-40	6.90921e-36	0.209064	155	231
GTF2F1	0.064223	0.0659548	0.845242	1	0.973742	168	170
ABR	0.14382	0.0436205	4.15e-06	0.0540164	3.29708	204	137
ALDH9A1	7.09683	21.58	3.28e-51	5.10138e-47	0.328861	232	232
PRKCD	0.268782	0.350393	0.0161051	1	0.767087	224	232
KLC2	0.0762643	0.0629594	0.220644	1	1.21133	130	155
SLC1A1	0.108208	0.412638	1.07e-25	1.61356e-21	0.262236	176	227
NEDD4	0.24003	0.246237	0.861974	1	0.974794	226	230
PDCD5	4.38513	2.98056	1.08e-07	0.00145584	1.47124	229	232
HSP90AB1	46.0997	45.6849	0.886844	1	1.00908	232	232
SET	10.798	8.38358	0.000773638	1	1.288	231	232
CCDC50	0.328801	0.172365	4.16e-05	0.524618	1.90759	202	203
PSMD7	1.81642	1.61518	0.143456	1	1.12459	232	232
FUOM	0.125551	0.535861	4.27e-16	6.23762e-12	0.234297	88	195
UBL4A	0.745135	0.78867	0.76996	1	0.9448	198	219
PDIA3	60.2116	41.3327	8.42e-09	0.000115455	1.45675	232	232
DAPK3	0.140283	0.092885	0.024588	1	1.51029	162	141
TUBAL3	3.72724	3.40388	0.21567	1	1.095	231	232
CMAS	1.3859	1.07289	0.00184235	1	1.29175	230	232
CAPN1	8.20247	5.59392	1.11e-10	1.56077e-06	1.46632	232	232
RNASET2	3.92822	4.93192	0.0200361	1	0.796489	227	232
HAPLN1	3.561	0.0416048	0.0397124	1	85.5911	196	51
C9orf64	1.06267	0.711795	7.14e-07	0.00946407	1.49294	228	232
CLEC11A	0.193659	0.201756	0.80476	1	0.959866	163	197
FUBP1	2.43177	1.78646	3.84e-07	0.00512141	1.36123	230	232
RARRES2	0.739477	1.26506	1.37e-07	0.00184251	0.584538	216	230
PSMA4	6.82094	5.58289	0.00788488	1	1.22176	232	232
COL21A1	2.03696	0.193485	1.35e-05	0.173232	10.5277	221	211
PSMD8	0.620653	0.756084	0.017038	1	0.820878	228	228
YIF1B	0.439096	0.248915	6.11e-10	8.52345e-06	1.76404	220	219
CAND1	3.6102	3.15517	0.00294837	1	1.14422	232	232
ATRN	0.074638	0.0688037	0.632844	1	1.0848	221	205
STX6	0.516573	0.348439	0.00370972	1	1.48253	223	221
PRPF38B	0.167816	0.111143	0.178316	1	1.50992	198	154
AOC1	3.62346	11.4172	2.09e-23	3.13542e-19	0.317369	211	232
FDPS	1.19442	1.84893	0.000920415	1	0.646003	231	232
DDX56	0.0499646	0.00823711	3.52e-08	0.000478262	6.06579	153	51
NXF1	0.231813	0.202772	0.590082	1	1.14322	218	222
TNIP1	0.147461	0.0917731	0.287977	1	1.6068	164	67
HSPB6	0.634859	1.49708	6.14e-09	8.43575e-05	0.424064	138	217
CDH5	0.756483	0.830156	0.490372	1	0.911253	220	232
MCM2	0.45624	0.0247612	2.71e-25	4.08261e-21	18.4256	208	41
KDELC2	0.358836	0.183786	2.18e-10	3.05789e-06	1.95247	228	230
NRBP1	0.293844	0.343531	0.279767	1	0.855362	216	225
MCCC1	1.68883	11.6726	8.79e-90	1.3861e-85	0.144683	226	232
TMEM97	0.178591	0.100259	0.0106868	1	1.7813	177	149
GLRX5	1.84735	5.51834	3.35e-30	5.09066e-26	0.334765	217	232
PURB	1.57552	1.12963	0.0267063	1	1.39473	197	198
DENR	0.892717	0.40177	0.00767749	1	2.22196	209	206
BAG1	0.159313	0.328438	2.96e-09	4.0851e-05	0.485064	182	222
PAAF1	0.0985756	0.0956021	0.796607	1	1.0311	177	183
WIPF2	0.0386137	0.0402266	0.720459	1	0.959905	164	185
ARF5	21.9222	36.4532	8.14e-20	1.20879e-15	0.601379	228	230
PMPCB	0.502555	1.35469	1.56e-30	2.37214e-26	0.370973	224	232
CPVL	1.58194	2.97299	1.05e-08	0.000143797	0.532104	231	232
NELFB	0.282642	0.247759	0.193032	1	1.14079	211	218
MGST2	6.77329	8.8579	2.67e-05	0.33925	0.764661	231	232
XPO5	0.156425	0.078727	1.01e-07	0.00136209	1.98694	211	216
MAGT1	0.3815	0.230019	0.00339142	1	1.65856	221	210
NAT8	3.46561	59.8748	1.59e-45	2.45957e-41	0.057881	204	231
EHD1	3.11584	5.8093	1.77e-32	2.69783e-28	0.536354	232	232
STRBP	1.7789	1.073	2.27e-08	0.000309446	1.65787	228	232
HEBP2	2.02921	2.07851	0.768062	1	0.976283	223	232
ATP6AP2	0.186941	0.056103	3.71e-07	0.00494914	3.3321	203	172
MPHOSPH10	0.0440391	0.00959539	4.28e-06	0.0556785	4.58962	154	79
SPARC	1.6885	0.570018	1.72e-12	2.45908e-08	2.96219	229	196
CCAR1	0.48025	0.525848	0.278206	1	0.913287	227	232
RPS27L	1.59892	1.09664	0.0190855	1	1.45801	122	111
PRKG1	0.45603	0.475732	0.697927	1	0.958587	217	231
GCLC	1.03082	1.76305	7.59e-12	1.07968e-07	0.58468	232	232
PABPN1	1.11648	0.828951	3.07e-06	0.0400881	1.34686	222	225
MRP63	0.27104	1.0663	1.03e-10	1.4489e-06	0.254188	103	193
DCPS	1.94653	1.76751	0.263978	1	1.10128	228	232
ACSS2	0.356909	0.282189	0.601682	1	1.26479	211	231
AHCYL1	1.28603	1.75341	1.13e-05	0.145318	0.733447	226	232
PROCR	0.533813	0.610877	0.211266	1	0.873847	207	195
KIAA1279	0.114028	0.0425427	0.00893619	1	2.68033	165	171
SERPING1	12.7279	11.3597	0.286634	1	1.12045	232	232
GIPC1	0.563223	1.40506	2.28e-14	3.29346e-10	0.400852	215	231
PPP1R8	1.40949	0.886677	0.0443102	1	1.58963	199	197
PBDC1	2.07372	1.74097	0.0166179	1	1.19113	231	232
P4HB	81.8639	29.9047	2.09e-15	3.04179e-11	2.73749	232	232
S100A1	83.8119	24.6401	1.07e-06	0.0141101	3.40144	213	228
UBA5	0.643649	0.516187	0.00602952	1	1.24693	225	231
RNF181	0.176993	0.227556	0.0382465	1	0.7778	181	204
HECTD3	0.283174	0.595741	1.36e-14	1.96738e-10	0.475331	221	232
HIF1AN	0.115265	0.0480642	1.09e-06	0.0143695	2.39814	196	152
CPSF1	0.281716	0.176086	0.00885606	1	1.59988	219	231
HDGF	8.05478	6.155	4.86e-05	0.611242	1.30866	231	232
CHID1	1.76356	2.22423	0.0462135	1	0.792888	230	232
NT5C3A	0.578215	0.583491	0.926517	1	0.990958	218	232
ARHGDIA	29.2725	28.5228	0.669037	1	1.02629	232	232
APOA2	13.0454	6.85434	0.0180722	1	1.90323	227	219
COPZ1	2.69666	2.29365	0.0500996	1	1.17571	230	232
MTDH	2.79034	1.43979	3.94e-15	5.72324e-11	1.93802	231	232
COG3	0.885879	0.476499	0.268402	1	1.85914	198	221
SNRNP40	1.17737	0.782638	1.83e-06	0.0240151	1.50436	224	228
BCL7C	0.0863517	0.0521328	0.0071481	1	1.65638	123	90
ABCB10	0.155882	0.128629	0.142363	1	1.21187	199	227
LRWD1	0.0488546	0.0240382	0.0116124	1	2.03237	146	136
SRPK2	0.0416372	0.0208838	0.177907	1	1.99375	120	67
GPT	1.08979	5.15485	1.6e-27	2.42048e-23	0.211411	167	230
NADSYN1	0.175931	0.13266	0.0302209	1	1.32617	211	213
SLC35A3	0.389612	0.510163	0.0915687	1	0.7637	182	191
NGLY1	0.10037	0.159148	0.0857975	1	0.630672	209	228
SNX27	0.385885	0.797289	7.3e-10	1.01733e-05	0.483997	225	232
PKP4	0.274963	0.387091	0.0289434	1	0.710334	211	231
RUFY1	0.884879	0.721019	0.0394736	1	1.22726	228	232
FAM115C	0.100176	0.00497595	4.39e-06	0.0570963	20.132	177	20
STXBP2	0.572531	0.996439	1.87e-14	2.70215e-10	0.574577	228	232
ITSN2	0.169921	0.28909	0.0191911	1	0.587777	223	232
MRPS22	0.778445	2.2094	3.14e-39	4.82901e-35	0.352333	221	232
PRKCSH	17.8235	13.4604	6.8e-05	0.850272	1.32415	232	232
AKAP12	0.97671	0.839273	0.138043	1	1.16376	223	232
GOLPH3	0.498578	0.426739	0.222158	1	1.16834	211	228
SEC24A	0.336769	0.273711	0.116377	1	1.23038	228	231
DDX39A	4.17967	2.85981	3.32e-08	0.000451288	1.46152	218	195
PRDX5	75.3762	154.065	2.55e-26	3.8505e-22	0.489249	232	232
FTL	71.3575	16.6159	1.1e-06	0.0144991	4.29454	232	232
CSTB	41.3779	29.5402	0.000216467	1	1.40073	231	232
MTTP	0.0875797	0.600814	5.58e-36	8.54633e-32	0.145768	52	214
CUTA	9.14197	10.7675	0.0107144	1	0.84903	230	232
HGD	4.39582	18.2695	1.2e-54	1.87224e-50	0.24061	224	232
PDE12	0.315512	0.602148	9.74e-12	1.38435e-07	0.523978	221	231
EPB41L1	0.6655	2.13579	1.28e-48	1.98682e-44	0.311594	222	232
RPAP3	0.127349	0.158474	0.221801	1	0.803592	190	224
BLOC1S4	0.205517	0.242757	0.56843	1	0.846593	175	163
HMGB3	3.06437	4.14991	0.0233318	1	0.738417	182	200
SNRPC	2.59062	1.98569	1.89e-06	0.0247987	1.30464	230	230
OGFR	0.132924	0.0821623	8.37e-06	0.108132	1.61782	221	207
TIMM13	5.17021	17.6936	4.75e-43	7.3283e-39	0.292208	229	232
PIK3R4	0.119375	0.361443	2.68e-11	3.7914e-07	0.330273	218	232
CDK5RAP3	1.20662	1.10192	0.293551	1	1.09501	231	232
IK	0.196917	0.255397	0.164874	1	0.771022	208	204
UBQLN2	0.636237	0.736068	0.401607	1	0.864373	223	229
H2AFY2	2.38959	5.58126	2.33e-18	3.44001e-14	0.428145	216	232
LANCL1	2.07439	2.21099	0.267199	1	0.938219	232	232
SLC2A5	1.35926	3.18066	1.42e-11	2.01555e-07	0.427352	214	227
M6PR	0.952646	0.504878	3.87e-09	5.33325e-05	1.88688	226	231
PHKB	0.502963	0.228577	9.64e-05	1	2.20041	227	232
DEGS1	0.492867	0.0413595	2.73e-17	4.01146e-13	11.9167	222	152
ZFYVE20	0.0240384	0.0348654	0.152768	1	0.689464	110	174
KPNA2	0.0419722	0.0105985	0.000158101	1	3.96019	156	116
FIBP	0.542747	0.373301	0.208679	1	1.45391	221	229
GGA2	0.167341	0.287267	0.00737176	1	0.582528	180	211
HNRNPF	7.62391	5.88503	2.3e-05	0.29302	1.29548	232	232
FCHO2	0.436654	1.20429	0.000144303	1	0.362581	224	232
PYCARD	1.83291	0.321926	8.19e-18	1.20631e-13	5.69358	228	210
GMDS	0.615727	0.916631	3.82e-06	0.0497746	0.671729	224	232
SCAMP4	1.08733	1.60078	0.0323212	1	0.67925	125	166
PLS3	5.57668	9.49055	2.69e-19	3.98766e-15	0.587604	231	232
HOOK3	0.400442	0.38604	0.662461	1	1.03731	227	232
CD276	0.0942918	0.00722737	4e-07	0.0053332	13.0465	143	17
GALT	0.325352	0.908912	8.85e-33	1.34971e-28	0.357958	216	231
OSBPL1A	0.0713081	0.0660398	0.751507	1	1.07977	165	169
LYRM4	0.290885	0.932829	3.61e-25	5.43666e-21	0.311831	147	219
RPLP2	105.874	86.6597	0.00332822	1	1.22173	231	232
PDCL3	0.343507	0.448915	0.0982827	1	0.765195	216	224
UQCRFS1	3.32684	28.2761	1.87e-73	2.9445e-69	0.117655	230	232
GALK1	3.06319	9.76912	6.84e-37	1.04898e-32	0.313558	232	232
SF3B5	0.502722	0.333519	0.0153156	1	1.50733	149	146
OXCT1	4.4958	8.1248	0.0224918	1	0.553343	228	232
BAK1	0.393857	0.303802	0.324328	1	1.29643	171	192
EIF1B	0.763393	1.40388	5.65e-05	0.708793	0.543771	74	141
COPS7A	0.849385	1.31537	4.96e-07	0.0065973	0.645736	225	232
CBX5	2.63913	2.4182	0.24308	1	1.09136	226	230
COPG1	1.65299	1.57557	0.404713	1	1.04914	231	232
TPP1	9.98137	7.26831	0.00143904	1	1.37327	232	232
NUP35	0.258622	0.137718	2.3e-05	0.29302	1.87792	214	174
CMBL	12.5329	28.671	1.04e-15	1.51653e-11	0.437128	229	232
GCSH	1.52839	8.87225	2.93e-27	4.43045e-23	0.172267	173	224
NMD3	0.171413	0.0613525	4.7e-06	0.0610906	2.79391	199	173
THRAP3	0.553593	0.414745	6.44e-05	0.805837	1.33478	228	231
GNA13	2.15123	2.21115	0.785449	1	0.972901	231	232
IKBKG	0.311934	0.277203	0.337317	1	1.12529	216	198
NFIC	0.0702945	0.0691879	0.859897	1	1.01599	190	203
ATP6AP1	0.37284	0.697134	0.0594444	1	0.534818	221	229
GLOD4	4.00936	6.79525	6.47e-20	9.61183e-16	0.590024	232	232
SPTB	1.45207	1.12677	0.000432387	1	1.2887	231	232
DTX3L	0.143229	0.0226779	2.08e-17	3.05781e-13	6.3158	208	85
MNDA	2.04947	0.118544	0.000705983	1	17.2887	231	176
SLC27A1	0.27939	0.391852	0.331408	1	0.712998	216	230
DOCK7	0.205211	0.361391	1.87e-05	0.23893	0.567838	216	231
NUP205	0.339791	0.251437	0.00136407	1	1.3514	231	232
SLC25A24	2.80615	3.28626	0.00368566	1	0.853905	231	232
FAM50A	0.217401	0.0691799	0.0125716	1	3.14255	118	88
RPL36	8.95465	6.47403	0.00297162	1	1.38317	217	230
XRCC5	8.983	7.96382	0.0209059	1	1.12798	231	232
MIA3	0.246329	0.270937	0.407059	1	0.909173	226	232
APOA4	9.87074	26.5813	7.31e-16	1.06689e-11	0.371341	232	232
NDUFA10	1.3609	9.12288	2.26e-73	3.55837e-69	0.149174	229	232
HPS5	0.0305558	0.0105834	0.000314148	1	2.88713	127	86
ACADL	1.82127	2.59795	0.000298796	1	0.701041	197	229
PNMA2	0.127574	0.010435	7.48e-11	1.05356e-06	12.2256	137	20
STK25	0.0630928	0.107919	0.0357428	1	0.584628	129	180
SLC25A13	3.63902	10.352	3.12e-46	4.83132e-42	0.351529	231	232
UBE2B	0.951777	0.671185	0.16216	1	1.41805	122	101
DNAJA1	2.12633	1.72631	0.00723332	1	1.23172	230	232
STIP1	2.26599	2.5805	0.0610253	1	0.87812	232	232
TIA1	0.228151	0.145489	2.25e-05	0.286672	1.56817	208	168
SUMF1	0.10656	0.552933	4.83e-07	0.00642583	0.192717	128	175
[truncated: 4,112 more rows]

## Sheet: Upregulated pathways
Category	Term	Count	%	p value	Genes	List Total	Pop Hits	Pop Total	Fold Enrichment	Bonferroni	Benjamini	FDR
KEGG_PATHWAY	hsa05416:Viral myocarditis	21	3.0837	7.93068e-13	HLA-DQB1, PRF1, ICAM1, ITGAL, CAV1, HLA-A, HLA-C, ITGB2, HLA-B, CD40, HLA-DMB, HLA-E, HLA-DMA, HLA-DQA1, HLA-F, CCND1, CASP8, HLA-DRB4, HLA-DPA1, HLA-DPB1, HLA-DRA	337	57	6879	7.52038	1.91121e-10	1.91121e-10	1.02428e-09
KEGG_PATHWAY	hsa04145:Phagosome	31	4.55213	2.01574e-11	HLA-DQB1, MSR1, TLR2, C1R, ITGB2, HLA-DMB, HLA-DMA, CANX, FCGR1A, TAP2, TAP1, HLA-DRB4, SCARB1, HLA-DPB1, THBS1, THBS2, THBS3, TCIRG1, HLA-A, HLA-C, HLA-B, HLA-E, HLA-DQA1, HLA-F, CORO1A, CD36, ITGA5, HLA-DPA1, FCGR2A, CD14, HLA-DRA	337	150	6879	4.21858	4.85794e-09	2.42897e-09	2.60353e-08
KEGG_PATHWAY	hsa04612:Antigen processing and presentation	21	3.0837	3.0424e-10	HLA-DQB1, HLA-A, HLA-C, HLA-B, HLA-DMB, HLA-E, HLA-DMA, CANX, HLA-DQA1, CD74, TAPBP, HLA-F, B2M, PSME2, TAP2, TAP1, HLA-DRB4, CD4, HLA-DPA1, HLA-DPB1, HLA-DRA	337	76	6879	5.64029	7.33218e-08	2.44406e-08	3.92956e-07
KEGG_PATHWAY	hsa05150:Staphylococcus aureus infection	18	2.64317	3.10395e-10	HLA-DQB1, ICAM1, ITGAL, C1R, ITGB2, HLA-DMB, HLA-DMA, C1QC, HLA-DQA1, C1QA, C1QB, FGG, FCGR1A, HLA-DRB4, HLA-DPA1, FCGR2A, HLA-DPB1, HLA-DRA	337	54	6879	6.80415	7.48051e-08	1.87013e-08	4.00906e-07
KEGG_PATHWAY	hsa05330:Allograft rejection	15	2.20264	7.39587e-10	HLA-DQB1, PRF1, HLA-A, HLA-C, CD40, HLA-B, HLA-DMB, HLA-E, HLA-DMA, HLA-DQA1, HLA-F, HLA-DRB4, HLA-DPA1, HLA-DPB1, HLA-DRA	337	37	6879	8.27532	1.7824e-07	3.56481e-08	9.55251e-07
KEGG_PATHWAY	hsa05332:Graft-versus-host disease	14	2.0558	1.69098e-09	HLA-DQB1, PRF1, HLA-A, HLA-C, HLA-B, HLA-DMB, HLA-E, HLA-DMA, HLA-DQA1, HLA-F, HLA-DRB4, HLA-DPA1, HLA-DPB1, HLA-DRA	337	33	6879	8.65983	4.07526e-07	6.79209e-08	2.18407e-06
KEGG_PATHWAY	hsa04611:Platelet activation	26	3.81791	2.43604e-09	FERMT3, PTGS1, COL2A1, APBB1IP, FGG, FGA, FGB, GUCY1A3, FCER1G, ARHGEF1, TBXAS1, LYN, PIK3CD, STIM1, ITPR3, COL5A3, COL5A2, VASP, COL5A1, VWF, MAPK13, COL1A2, FCGR2A, COL1A1, PLA2G4C, LCP2	337	130	6879	4.08249	5.87087e-07	8.38695e-08	3.14639e-06
KEGG_PATHWAY	hsa04514:Cell adhesion molecules (CAMs)	26	3.81791	1.6137e-08	HLA-DQB1, ITGAL, ITGB2, HLA-DMB, HLA-DMA, VCAM1, HLA-DRB4, CD4, ESAM, HLA-DPB1, ICAM1, PTPRC, ICAM3, CD276, HLA-A, HLA-C, CD40, HLA-B, HLA-E, HLA-DQA1, HLA-F, SIGLEC1, PECAM1, VCAN, HLA-DPA1, HLA-DRA	337	142	6879	3.73749	3.889e-06	4.86126e-07	2.08425e-05
KEGG_PATHWAY	hsa05169:Epstein-Barr virus infection	24	3.52423	1.61422e-08	HLA-DQB1, ICAM1, ITGAL, LYN, VIM, PIK3CD, HLA-A, HLA-C, HLA-B, NFKB2, CD40, HLA-E, HLA-DQA1, HLA-F, TRADD, DDX58, MAPK13, BCL2, HLA-DRB4, HLA-DPA1, HLA-DPB1, ENTPD1, NCOR2, HLA-DRA	337	122	6879	4.01557	3.89026e-06	4.32252e-07	2.08493e-05
KEGG_PATHWAY	hsa04940:Type I diabetes mellitus	14	2.0558	5.0423e-08	HLA-DQB1, PRF1, HLA-A, HLA-C, HLA-B, HLA-DMB, HLA-E, HLA-DMA, HLA-DQA1, HLA-F, HLA-DRB4, HLA-DPA1, HLA-DPB1, HLA-DRA	337	42	6879	6.80415	1.21519e-05	1.21519e-06	6.51263e-05
KEGG_PATHWAY	hsa05320:Autoimmune thyroid disease	15	2.20264	1.09656e-07	HLA-DQB1, PRF1, HLA-A, HLA-C, CD40, HLA-B, HLA-DMB, HLA-E, HLA-DMA, HLA-DQA1, HLA-F, HLA-DRB4, HLA-DPA1, HLA-DPB1, HLA-DRA	337	52	6879	5.88821	2.64267e-05	2.40246e-06	0.000141631
KEGG_PATHWAY	hsa05168:Herpes simplex infection	27	3.96476	7.15152e-07	HLA-DQB1, IFIH1, OAS3, PML, TLR2, TLR3, OAS1, OAS2, HLA-DMB, HLA-DMA, CD74, TAP2, CASP8, TAP1, HLA-DRB4, HLA-DPB1, HLA-A, HLA-C, HLA-B, HLA-E, STAT1, HLA-DQA1, STAT2, HLA-F, DDX58, HLA-DPA1, HLA-DRA	337	183	6879	3.01167	0.000172337	1.43625e-05	0.000923686
KEGG_PATHWAY	hsa04512:ECM-receptor interaction	18	2.64317	7.41594e-07	ITGB4, COL2A1, COL5A3, COL5A2, COL5A1, VWF, LAMA4, CD36, ITGA5, COL6A3, COL6A2, COL1A2, COL6A1, COL1A1, THBS1, THBS2, THBS3, FN1	337	87	6879	4.22327	0.000178708	1.37479e-05	0.000957839
KEGG_PATHWAY	hsa05152:Tuberculosis	26	3.81791	1.31739e-06	HLA-DQB1, TLR2, ITGB2, HLA-DMB, HLA-DMA, CD74, ITGAX, BCL2, FCGR1A, CASP8, HLA-DRB4, FCER1G, HLA-DPB1, TCIRG1, STAT1, HLA-DQA1, TRADD, LSP1, CASP10, CORO1A, MAPK13, HLA-DPA1, FCGR2A, APAF1, CD14, HLA-DRA	337	177	6879	2.99844	0.000317442	2.26777e-05	0.00170153
KEGG_PATHWAY	hsa00010:Glycolysis / Gluconeogenesis	15	2.20264	3.1089e-06	ALDOA, LDHA, LDHAL6B, ALDOC, HK2, PGAM1, PFKP, PKM, GPI, TPI1, HK3, ENO2, ENO3, PGK1, ENO1	337	67	6879	4.56995	0.000748966	4.99486e-05	0.00401539
KEGG_PATHWAY	hsa05140:Leishmaniasis	15	2.20264	6.40007e-06	HLA-DQB1, PTPN6, TLR2, ITGB2, HLA-DMB, STAT1, HLA-DMA, HLA-DQA1, MAPK13, FCGR1A, HLA-DRB4, HLA-DPA1, FCGR2A, HLA-DPB1, HLA-DRA	337	71	6879	4.31249	0.00154123	9.63967e-05	0.00826602
KEGG_PATHWAY	hsa05310:Asthma	10	1.46843	8.17165e-06	HLA-DQB1, HLA-DRB4, FCER1G, HLA-DPA1, CD40, HLA-DPB1, HLA-DMB, HLA-DMA, HLA-DQA1, HLA-DRA	337	30	6879	6.80415	0.00196744	0.000115839	0.010554
KEGG_PATHWAY	hsa04510:Focal adhesion	26	3.81791	2.06199e-05	CAV2, CAV1, DIAPH1, ITGB4, COL2A1, BCL2, COL6A3, COL6A2, COL6A1, THBS1, THBS2, THBS3, FN1, EGFR, FLT1, PIK3CD, COL5A3, COL5A2, COL5A1, VASP, VWF, LAMA4, CCND1, ITGA5, COL1A2, COL1A1	337	206	6879	2.57633	0.00495713	0.000276043	0.0266294
KEGG_PATHWAY	hsa05144:Malaria	11	1.61527	0.000100934	VCAM1, ICAM1, ITGAL, CD36, PECAM1, TLR2, ITGB2, CD40, THBS1, THBS2, THBS3	337	49	6879	4.58239	0.0240328	0.00127951	0.130288
KEGG_PATHWAY	hsa05164:Influenza A	22	3.23054	0.000103457	HLA-DQB1, ICAM1, IFIH1, PIK3CD, OAS3, PML, TLR3, OAS1, OAS2, HLA-DMB, STAT1, HLA-DMA, HLA-DQA1, STAT2, DDX58, MAPK13, PYCARD, HLA-DRB4, HLA-DPA1, HLA-DPB1, CASP1, HLA-DRA	337	174	6879	2.58089	0.0246261	0.00124594	0.133543
KEGG_PATHWAY	hsa00500:Starch and sucrose metabolism	9	1.32159	0.000141322	GPI, PYGM, PYGL, ENPP3, HK3, GYS1, HK2, GYS2, PGM2L1	337	33	6879	5.56704	0.0334875	0.00162064	0.182378
KEGG_PATHWAY	hsa04066:HIF-1 signaling pathway	15	2.20264	0.000209663	PDK1, EGFR, FLT1, PIK3CD, HK2, RPS6KB1, RPS6, HK3, BCL2, HMOX1, SLC2A1, ENO2, ENO3, ANGPT2, ENO1	337	96	6879	3.18945	0.0492784	0.00229436	0.270462
KEGG_PATHWAY	hsa05166:HTLV-I infection	27	3.96476	0.000253687	HLA-DQB1, ITGAL, ITGB2, NFKB2, HLA-DMB, HLA-DMA, CANX, VCAM1, SLC2A1, HLA-DRB4, HLA-DPB1, NFATC2, ICAM1, PIK3CD, HLA-A, HLA-C, CD40, HLA-B, HLA-E, CDK4, ATM, HLA-DQA1, HLA-F, CCND1, LCK, HLA-DPA1, HLA-DRA	337	254	6879	2.16983	0.0593145	0.00265501	0.327168
KEGG_PATHWAY	hsa05145:Toxoplasmosis	16	2.34949	0.000268341	HLA-DQB1, TLR2, CD40, HLA-DMB, STAT1, HLA-DMA, HLA-DQA1, LAMA4, MAPK13, BCL2, CASP8, HLA-DRB4, HLA-DPA1, ALOX5, HLA-DPB1, HLA-DRA	337	110	6879	2.96909	0.0626316	0.00269133	0.346036
KEGG_PATHWAY	hsa05323:Rheumatoid arthritis	14	2.0558	0.000308686	HLA-DQB1, TCIRG1, ICAM1, ITGAL, FLT1, TLR2, ITGB2, HLA-DMB, HLA-DMA, HLA-DQA1, HLA-DRB4, HLA-DPA1, HLA-DPB1, HLA-DRA	337	88	6879	3.24744	0.0717042	0.00297177	0.397967
KEGG_PATHWAY	hsa05146:Amoebiasis	15	2.20264	0.000594986	PIK3CD, TLR2, ITGB2, COL2A1, COL5A3, COL5A2, COL5A1, SERPINB9, LAMA4, COL1A2, HSPB1, SERPINB1, COL1A1, CD14, FN1	337	106	6879	2.88856	0.133622	0.00550152	0.765766
KEGG_PATHWAY	hsa04151:PI3K-Akt signaling pathway	31	4.55213	0.00138658	TLR2, ITGB4, RPS6KB1, COL2A1, BCL2, COL6A3, COL6A2, GYS1, COL6A1, GYS2, THBS1, ANGPT2, THBS2, THBS3, FN1, EGFR, FLT1, PIK3CD, PKN1, CDK6, CDK4, RPS6, COL5A3, COL5A2, COL5A1, VWF, CCND1, LAMA4, ITGA5, COL1A2, COL1A1	337	345	6879	1.83416	0.28423	0.0123087	1.77618
KEGG_PATHWAY	hsa04672:Intestinal immune network for IgA production	9	1.32159	0.00176127	HLA-DQB1, HLA-DRB4, HLA-DPA1, CD40, HLA-DPB1, HLA-DMB, HLA-DMA, HLA-DQA1, HLA-DRA	337	47	6879	3.90877	0.346126	0.0150583	2.25114
KEGG_PATHWAY	hsa05322:Systemic lupus erythematosus	16	2.34949	0.00215478	HLA-DQB1, C1R, CD40, HLA-DMB, HLA-DMA, C1QC, TRIM21, HLA-DQA1, C1QA, C1QB, FCGR1A, HLA-DRB4, HLA-DPA1, FCGR2A, HLA-DPB1, HLA-DRA	337	134	6879	2.43731	0.405398	0.0177666	2.74766
KEGG_PATHWAY	hsa01230:Biosynthesis of amino acids	11	1.61527	0.00242777	ALDOA, BCAT1, PKM, TPI1, ALDOC, ENO2, PGAM1, PFKP, ENO3, PGK1, ENO1	337	72	6879	3.11857	0.443342	0.0193374	3.09075
KEGG_PATHWAY	hsa04064:NF-kappa B signaling pathway	12	1.76211	0.00320411	DDX58, VCAM1, ICAM1, LYN, BCL2, LCK, UBE2I, NFKB2, CD40, CD14, ATM, TRADD	337	87	6879	2.81551	0.538572	0.0246407	4.06034
KEGG_PATHWAY	hsa01200:Carbon metabolism	14	2.0558	0.00328762	ALDOA, ME1, ALDOC, PFKP, HK2, PGAM1, PKM, GPI, TPI1, HK3, ENO2, ENO3, PGK1, ENO1	337	113	6879	2.52898	0.547795	0.0244956	4.1641
KEGG_PATHWAY	hsa05321:Inflammatory bowel disease (IBD)	10	1.46843	0.00363031	HLA-DQB1, HLA-DRB4, TLR2, HLA-DPA1, HLA-DPB1, HLA-DMB, STAT1, HLA-DMA, HLA-DQA1, HLA-DRA	337	64	6879	3.18945	0.583761	0.0262109	4.58881
KEGG_PATHWAY	hsa05230:Central carbon metabolism in cancer	10	1.46843	0.00363031	SLC16A3, PKM, EGFR, PDK1, HK3, PIK3CD, SLC2A1, PGAM1, HK2, PFKP	337	64	6879	3.18945	0.583761	0.0262109	4.58881
KEGG_PATHWAY	hsa05161:Hepatitis B	16	2.34949	0.00461614	IFIH1, PIK3CD, TLR2, TLR3, CDK6, CDK4, STAT1, STAT2, DDX58, CASP10, CCND1, BCL2, CASP8, DDB2, APAF1, NFATC2	337	145	6879	2.25241	0.672106	0.0322641	5.80095
KEGG_PATHWAY	hsa04666:Fc gamma R-mediated phagocytosis	11	1.61527	0.00745732	PTPRC, ARPC1B, DOCK2, LYN, FCGR1A, HCK, PIK3CD, RPS6KB1, FCGR2A, INPP5D, VASP	337	84	6879	2.67306	0.835352	0.0502356	9.21532
KEGG_PATHWAY	hsa05133:Pertussis	10	1.46843	0.0103599	C1QA, C1QB, MAPK13, ITGA5, PYCARD, ITGB2, C1R, CASP1, C1QC, CD14	337	75	6879	2.72166	0.918712	0.0673409	12.5853
KEGG_PATHWAY	hsa05100:Bacterial invasion of epithelial cells	10	1.46843	0.0132445	CAV2, ARPC1B, CAV1, ITGA5, HCLS1, PIK3CD, RHOG, ELMO2, ELMO1, FN1	337	78	6879	2.61698	0.959774	0.0831804	15.8197
KEGG_PATHWAY	hsa04144:Endocytosis	21	3.0837	0.0136601	ARFGAP1, STAMBP, EGFR, CAV2, CAV1, ARFGAP3, PML, HLA-A, HLA-C, HLA-B, HLA-E, HLA-F, ARPC1B, RAB31, SMAP2, ARRB2, SH3GLB1, WIPF1, RAB11FIP1, EHD2, ARAP1	337	241	6879	1.77868	0.963658	0.0835346	16.2765
KEGG_PATHWAY	hsa05134:Legionellosis	8	1.17474	0.0152729	CASP8, PYCARD, TLR2, ITGB2, APAF1, NFKB2, CASP1, CD14	337	54	6879	3.02407	0.975502	0.0907245	18.0276
KEGG_PATHWAY	hsa01130:Biosynthesis of antibiotics	19	2.79001	0.0153132	BCAT1, ALDOA, LDHA, LDHAL6B, ALDOC, PFKP, HK2, PGAM1, ACLY, PPAT, PKM, GPI, TPI1, HK3, ENO2, ENO3, PGK1, HSD17B7, ENO1	337	212	6879	1.82942	0.975742	0.0887843	18.0708
KEGG_PATHWAY	hsa00051:Fructose and mannose metabolism	6	0.881057	0.0183192	ALDOA, TPI1, ALDOC, HK3, HK2, PFKP	337	32	6879	3.82734	0.98839	0.102982	21.2431
KEGG_PATHWAY	hsa04610:Complement and coagulation cascades	9	1.32159	0.0185209	C1QA, VWF, C1QB, FGG, FGA, FGB, F2, C1R, C1QC	337	69	6879	2.6625	0.988951	0.101718	21.4519
KEGG_PATHWAY	hsa04922:Glucagon signaling pathway	11	1.61527	0.0221613	PHKA2, PKM, LDHA, PYGM, LDHAL6B, PYGL, SLC2A1, GYS1, PGAM1, GYS2, ITPR3	337	99	6879	2.26805	0.995488	0.118036	25.1329
KEGG_PATHWAY	hsa05340:Primary immunodeficiency	6	0.881057	0.0233877	PTPRC, TAP2, LCK, TAP1, CD4, CD40	337	34	6879	3.6022	0.996665	0.121573	26.3366
KEGG_PATHWAY	hsa04660:T cell receptor signaling pathway	11	1.61527	0.023598	PTPRC, PTPN6, MAPK13, NCK1, PIK3CD, LCK, CD4, NFATC2, GRAP2, CDK4, LCP2	337	100	6879	2.24537	0.996834	0.120054	26.5412
KEGG_PATHWAY	hsa03030:DNA replication	6	0.881057	0.0292835	MCM7, MCM2, MCM3, MCM4, MCM5, MCM6	337	36	6879	3.40208	0.999225	0.144194	31.8783
KEGG_PATHWAY	hsa05205:Proteoglycans in cancer	17	2.49633	0.0349836	EGFR, CAV2, PTPN6, CAV1, ARHGEF1, HCLS1, PIK3CD, TLR2, RPS6KB1, CD63, RPS6, ITPR3, CCND1, MAPK13, ITGA5, THBS1, FN1	337	200	6879	1.73506	0.999813	0.166896	36.8679
KEGG_PATHWAY	hsa05131:Shigellosis	8	1.17474	0.0354989	ARPC1B, MAPK13, ITGA5, DIAPH1, HCLS1, RHOG, ELMO2, ELMO1	337	64	6879	2.55156	0.999835	0.165961	37.302
KEGG_PATHWAY	hsa04115:p53 signaling pathway	8	1.17474	0.0439586	CCND1, CASP8, DDB2, CDK6, APAF1, THBS1, CDK4, ATM	337	67	6879	2.43731	0.99998	0.198364	44.0452
KEGG_PATHWAY	hsa04622:RIG-I-like receptor signaling pathway	8	1.17474	0.0536208	DDX58, CASP10, TMEM173, IFIH1, ISG15, MAPK13, CASP8, TRADD	337	70	6879	2.33285	0.999998	0.233284	50.9252
KEGG_PATHWAY	hsa05160:Hepatitis C	12	1.76211	0.0599241	DDX58, EGFR, MAPK13, PIK3CD, OAS3, TLR3, OAS1, SCARB1, OAS2, STAT1, TRADD, STAT2	337	133	6879	1.84173	1	0.253239	54.9835
KEGG_PATHWAY	hsa05162:Measles	12	1.76211	0.0599241	DDX58, IFIH1, CCND1, PIK3CD, OAS3, TLR2, OAS1, CDK6, OAS2, STAT1, CDK4, STAT2	337	133	6879	1.84173	1	0.253239	54.9835
KEGG_PATHWAY	hsa03008:Ribosome biogenesis in eukaryotes	9	1.32159	0.0613107	WDR75, WDR36, NOB1, UTP15, WDR3, NAT10, NOP56, PWP2, GNL3	337	87	6879	2.11163	1	0.254154	55.8336
KEGG_PATHWAY	hsa02010:ABC transporters	6	0.881057	0.0616821	ABCD1, TAP2, TAP1, ABCC3, ABCC1, ABCB6	337	44	6879	2.78352	1	0.251364	56.0587
KEGG_PATHWAY	hsa04974:Protein digestion and absorption	9	1.32159	0.0647222	COL6A3, COL1A2, COL6A2, COL6A1, COL2A1, COL1A1, COL5A3, COL5A2, COL5A1	337	88	6879	2.08764	1	0.258162	57.8625
KEGG_PATHWAY	hsa04110:Cell cycle	11	1.61527	0.0807843	CCND1, MCM7, CDK6, MCM2, MCM3, CDK4, MCM4, MCM5, ATM, STAG2, MCM6	337	124	6879	1.81078	1	0.308644	66.3101
KEGG_PATHWAY	hsa04210:Apoptosis	7	1.0279	0.080786	CASP10, BCL2, PIK3CD, CASP8, APAF1, ATM, TRADD	337	62	6879	2.30463	1	0.304078	66.3109
KEGG_PATHWAY	hsa04015:Rap1 signaling pathway	16	2.34949	0.0888603	FYB, EGFR, ITGAL, FLT1, SIPA1, PIK3CD, ITGB2, APBB1IP, VASP, DOCK4, PRKD2, MAPK13, THBS1, RAPGEF2, ANGPT2, LCP2	337	210	6879	1.55524	1	0.325282	69.9393
KEGG_PATHWAY	hsa00250:Alanine, aspartate and glutamate metabolism	5	0.734214	0.0891787	ADSSL1, IL4I1, CAD, ASNS, PPAT	337	35	6879	2.91607	1	0.321675	70.0747
KEGG_PATHWAY	hsa05014:Amyotrophic lateral sclerosis (ALS)	6	0.881057	0.0954089	DERL1, MAPK13, BCL2, APAF1, CASP1, NEFL	337	50	6879	2.4495	1	0.336075	72.6134
KEGG_PATHWAY	hsa05212:Pancreatic cancer	7	1.0279	0.0964021	EGFR, CCND1, ARHGEF6, PIK3CD, CDK6, STAT1, CDK4	337	65	6879	2.19827	1	0.334471	72.9993

## Sheet: Downregulated pathways
Category	Term	Count	%	p value	Genes	List Total	Pop Hits	Pop Total	Fold Enrichment	Bonferroni	Benjamini	FDR
KEGG_PATHWAY	hsa01100:Metabolic pathways	345	27.2512	4.52753e-95	LDHB, GDA, ALAD, BTD, EHHADH, GGT1, OGDH, NMRK1, UXS1, HIBADH, GLDC, FAH, GOT2, GOT1, NT5C2, PDHA1, GPT2, ATP6, ACSM2B, AADAT, ACAA2, GATM, SUCLG2, SUCLG1, ACSM2A, NME6, NME3, NNT, MGAM, BHMT, DLD, ATP5C1, ABAT, ATP6V1G3, MDH2, MDH1, MPST, ACAA1, HSD17B10, COASY, NAGLU, ACADSB, AHCY, ENPP1, NAGS, CYP51A1, ALDOB, ASL, ACAT1, HADHA, HADHB, QRSL1, ATP6V0C, GALNS, IDH2, COX6B1, IDH1, ALDH4A1, GCSH, M…	690	1219	6879	2.82158	1.18169e-92	1.18169e-92	5.92153e-92
KEGG_PATHWAY	hsa00190:Oxidative phosphorylation	99	7.81991	1.03595e-70	UQCRC2, ATP5D, UQCRC1, ATP5B, CYC1, NDUFAB1, COX5A, UQCRFS1, UQCRQ, COX5B, NDUFS7, NDUFS6, UQCR10, NDUFS5, NDUFS4, UQCR11, NDUFS8, ATP5L, ATP5O, ATP6V0D1, NDUFS3, ATP5I, COX17, NDUFS2, ATP6V0D2, ATP5H, NDUFS1, ATP6, ATP5J, ND1, NDUFB11, NDUFB10, ND4, ND5, ND2, ND3, NDUFC2, ATP6V1H, NDUFA13, COX4I1, NDUFC1, NDUFA10, ATP6V1D, NDUFA12, NDUFA11, COX6C, ATP6V1F, ATP6V1C1, ATP6V1C2, ATP6V1A, UQCRH, ATP…	690	133	6879	7.42095	2.70384e-68	1.35192e-68	1.35492e-67
KEGG_PATHWAY	hsa05012:Parkinson's disease	83	6.55608	2.95769e-46	ATP5D, UQCRC2, UQCRC1, ATP5B, CYC1, UCHL1, NDUFAB1, COX5A, UQCRFS1, COX5B, UQCRQ, NDUFS7, NDUFS6, NDUFS5, UQCR10, NDUFS4, UQCR11, HTRA2, NDUFS8, ATP5O, NDUFS3, NDUFS2, ATP5H, NDUFS1, ATP6, ATP5J, ND1, NDUFB11, NDUFB10, ND4, SLC25A4, ND5, SLC25A5, ND2, SLC25A6, CYCS, ND3, NDUFC2, NDUFA13, COX4I1, NDUFC1, NDUFA10, NDUFA12, NDUFA11, COX6C, UQCRH, ATP5C1, UQCRB, NDUFB3, NDUFB4, NDUFB5, NDUFB6, NDUFB7…	690	142	6879	5.82728	7.71957e-44	2.57319e-44	3.86834e-43
KEGG_PATHWAY	hsa01130:Biosynthesis of antibiotics	90	7.109	1.29591e-35	TM7SF2, LDHB, EHHADH, AMT, OGDHL, OGDH, PSPH, AGXT, PDHB, CMBL, GLDC, FDFT1, GOT2, ACSS1, GOT1, IDH3G, RGN, DAO, CAT, PDHA1, HADH, SUCLA2, AADAT, ACAA2, ACADM, ACO2, SUCLG2, ACO1, SUCLG1, FBP1, FBP2, NME6, ALDH7A1, CTH, NME3, ALDH1B1, HAO2, DLD, PCYOX1, PCCB, OAT, PCCA, MDH2, ALDH9A1, MDH1, ACAA1, HSD17B10, ASS1, CYP51A1, PAFAH2, ALDOB, ADH5, ECHS1, AASS, ASL, ACAT1, HADHA, ALDH3A2, HADHB, GALM, …	690	212	6879	4.23236	3.38233e-33	8.45582e-34	1.69491e-32
KEGG_PATHWAY	hsa05010:Alzheimer's disease	75	5.92417	2.5562e-31	UQCRC2, ATP5D, UQCRC1, ATP5B, CYC1, NDUFAB1, UQCRFS1, COX5A, COX5B, UQCRQ, NDUFS7, NDUFS6, NDUFS5, UQCR10, NDUFS4, UQCR11, NDUFS8, ATP5O, NDUFS3, NDUFS2, ATP5H, NDUFS1, ATP5J, ATP6, NDUFB11, NDUFB10, CYCS, NDUFC2, NDUFA13, COX4I1, NDUFC1, NDUFA10, NDUFA12, NDUFA11, COX6C, UQCRH, ATP5C1, UQCRB, NDUFB3, HSD17B10, NDUFB4, NDUFB5, NDUFB6, NDUFB7, NDUFB8, NDUFB9, COX7C, MME, CYTB, COX7A2L, NDUFB1, CAL…	690	168	6879	4.4507	6.67168e-29	1.33434e-29	3.34324e-28
KEGG_PATHWAY	hsa01200:Carbon metabolism	60	4.73934	3.97834e-30	AMT, EHHADH, OGDHL, OGDH, PSPH, AGXT, PDHB, GLDC, GOT2, ACSS1, IDH3G, GOT1, MCEE, RGN, CAT, PDHA1, SUCLA2, GPT2, ALDH6A1, ACADM, ACO2, ACADS, SUCLG2, ACO1, SUCLG1, FBP1, FBP2, HAO2, DLD, PCCB, PCCA, MDH2, MDH1, ME3, GLUD2, GLUD1, ALDOB, ADH5, ECHS1, ACAT1, HADHA, MUT, IDH2, IDH1, FH, DLST, SHMT1, CS, SDSL, IDH3B, DLAT, IDNK, SDHA, SDHB, SDHC, PHGDH, GPT, HIBCH, PSAT1, PC	690	113	6879	5.29357	1.03835e-27	1.73058e-28	5.20324e-27
KEGG_PATHWAY	hsa05016:Huntington's disease	77	6.08215	2.05031e-28	UQCRC2, ATP5D, UQCRC1, ATP5B, CYC1, NDUFAB1, UQCRFS1, COX5A, COX5B, UQCRQ, NDUFS7, NDUFS6, NDUFS5, UQCR10, NDUFS4, UQCR11, NDUFS8, ATP5O, NDUFS3, NDUFS2, ATP5H, NDUFS1, ATP5J, ATP6, NDUFB11, NDUFB10, SLC25A4, SLC25A5, SLC25A6, CYCS, NDUFC2, NDUFA13, COX4I1, NDUFC1, NDUFA10, NDUFA12, NDUFA11, COX6C, UQCRH, ATP5C1, UQCRB, NDUFB3, NDUFB4, NDUFB5, NDUFB6, NDUFB7, NDUFB8, NDUFB9, COX7C, CYTB, COX7A2L,…	690	192	6879	3.99821	5.35132e-26	7.64474e-27	2.68159e-25
KEGG_PATHWAY	hsa00280:Valine, leucine and isoleucine degradation	37	2.92259	2.64369e-27	HSD17B10, ACADSB, EHHADH, ECHS1, ACSF3, ACAT1, HADHA, ALDH3A2, HIBADH, HADHB, AUH, MCCC2, MUT, IVD, MCEE, MCCC1, ACAD8, HADH, HMGCL, BCKDHA, ACAA2, ALDH6A1, ACADM, ACADS, BCKDHB, DBT, ALDH7A1, ALDH1B1, AOX1, DLD, ALDH2, ABAT, HIBCH, PCCB, PCCA, ALDH9A1, ACAA1	690	47	6879	7.84838	6.90002e-25	8.62503e-26	3.45766e-24
KEGG_PATHWAY	hsa04932:Non-alcoholic fatty liver disease (NAFLD)	63	4.9763	2.50683e-24	UQCRC2, UQCRC1, CYC1, NDUFAB1, UQCRFS1, COX5A, UQCRQ, COX5B, NDUFS7, NDUFS6, NDUFS5, UQCR10, NDUFS4, UQCR11, NDUFS8, NDUFS3, NDUFS2, NDUFS1, NDUFB11, NDUFB10, CYCS, NDUFC2, NDUFA13, COX4I1, NDUFC1, NDUFA10, NDUFA12, COX6C, NDUFA11, UQCRH, UQCRB, NDUFB3, NDUFB4, NDUFB5, NDUFB6, NDUFB7, NDUFB8, NDUFB9, COX7C, CYTB, COX7A2L, NDUFB1, COX6B1, NDUFA4, NDUFA5, NDUFA2, COX7A2, NDUFA3, COX7A1, NDUFA8, NDU…	690	151	6879	4.15949	6.54282e-22	7.26981e-23	3.27866e-21
KEGG_PATHWAY	hsa00020:Citrate cycle (TCA cycle)	26	2.05371	5.99002e-21	OGDHL, OGDH, PDHB, IDH3G, IDH2, IDH1, PDHA1, SUCLA2, FH, DLST, ACO2, SUCLG2, ACO1, SUCLG1, CS, IDH3B, DLAT, PCK2, PCK1, SDHA, SDHB, SDHC, DLD, MDH2, PC, MDH1	690	30	6879	8.64029	1.5634e-18	1.5634e-19	7.83431e-18
KEGG_PATHWAY	hsa00071:Fatty acid degradation	28	2.21169	1.40725e-17	ACOX1, ACADSB, CPT2, EHHADH, ADH5, ADH1C, ADH1B, ECHS1, ADH6, ACAT1, HADHA, ALDH3A2, HADHB, ACSL1, HADH, ECI1, GCDH, ACAA2, ECI2, ACADM, ACADS, CPT1A, ACADVL, ALDH7A1, ALDH1B1, ALDH2, ALDH9A1, ACAA1	690	42	6879	6.64638	3.67291e-15	3.33901e-16	1.84053e-14
KEGG_PATHWAY	hsa00260:Glycine, serine and threonine metabolism	26	2.05371	2.53101e-16	AMT, GCAT, PSPH, AGXT, PIPOX, GLDC, SRR, GCSH, DMGDH, DAO, SARDH, SHMT1, CHDH, GATM, MAOA, MAOB, SDSL, GRHPR, ALDH7A1, CTH, DLD, BHMT, PHGDH, AGXT2, PSAT1, AOC3	690	39	6879	6.64638	5.79536e-14	4.88498e-15	2.88658e-13
KEGG_PATHWAY	hsa00630:Glyoxylate and dicarboxylate metabolism	21	1.65877	3.58854e-15	SHMT1, ACO2, ACO1, AMT, CS, HOGA1, GRHPR, AGXT, ACAT1, GLDC, AFMID, MUT, MCEE, HAO2, DLD, GCSH, CAT, PCCB, PCCA, MDH2, MDH1	690	27	6879	7.75411	9.27258e-13	7.12763e-14	4.65183e-12
KEGG_PATHWAY	hsa00380:Tryptophan metabolism	25	1.97472	9.50811e-15	KYNU, EHHADH, OGDHL, ECHS1, KMO, OGDH, ACAT1, ALDH3A2, HADHA, AFMID, HAAO, CAT, HADH, AADAT, GCDH, DDC, MAOA, MAOB, ACMSD, ALDH7A1, ALDH1B1, AOX1, ALDH2, AOC1, ALDH9A1	690	40	6879	6.23098	2.49201e-12	1.77969e-13	1.249e-11
KEGG_PATHWAY	hsa04146:Peroxisome	33	2.60664	3.59826e-12	ACOX2, ACOX1, HACL1, ECH1, EHHADH, PRDX5, AGXT, PEX11G, PIPOX, PECR, ACSL1, GSTK1, IDH2, PXMP2, ABCD3, IDH1, DAO, CAT, HMGCL, ECI2, NUDT19, AMACR, EPHX2, DECR2, CRAT, SOD1, PHYH, DHRS4, HAO2, SCP2, SLC27A2, CROT, ACAA1	690	83	6879	3.9638	9.39139e-10	6.26093e-11	4.7061e-09
KEGG_PATHWAY	hsa00640:Propanoate metabolism	19	1.50079	4.17811e-12	LDHB, ALDH6A1, ACADM, SUCLG2, EHHADH, SUCLG1, ECHDC1, ECHS1, ACAT1, ACSS3, HADHA, ACSS1, MUT, MCEE, ABAT, HIBCH, SUCLA2, PCCB, PCCA	690	28	6879	6.76506	1.09048e-09	6.81553e-11	5.46451e-09
KEGG_PATHWAY	hsa00620:Pyruvate metabolism	22	1.73776	1.61339e-11	LDHB, ME3, LDHD, GRHPR, DLAT, PCK2, ACAT1, ALDH3A2, PDHB, PCK1, HAGH, ACSS1, ALDH7A1, ALDH1B1, DLD, ALDH2, PDHA1, MDH2, ALDH9A1, PC, MDH1, FH	690	40	6879	5.48326	4.21097e-09	2.47704e-10	2.11015e-08
KEGG_PATHWAY	hsa01210:2-Oxocarboxylic acid metabolism	14	1.10585	1.49488e-10	AADAT, ACY1, NAGS, ACO2, ACO1, CS, IDH3B, GOT2, GOT1, IDH3G, IDH2, IDH1, GPT, GPT2	690	17	6879	8.21023	3.90164e-08	2.16758e-09	1.95515e-07
KEGG_PATHWAY	hsa04966:Collecting duct acid secretion	17	1.34281	3.94123e-10	CLCNKB, ATP6V1B2, ATP6V1G1, ATP6V1B1, ATP6V1D, ATP6V1F, ATP6V1C1, ATP6V0C, ATP6V1C2, ATP6V1A, ATP6V1E1, ATP6V0A1, CA2, ATP6V1G3, ATP6V0A4, ATP6V0D1, ATP6V0D2	690	27	6879	6.27713	1.02866e-07	5.414e-09	5.1547e-07
KEGG_PATHWAY	hsa04964:Proximal tubule bicarbonate reclamation	15	1.18483	3.12126e-09	FXYD2, ATP1B1, GLUD2, SLC9A3, GLUD1, ATP1A1, PCK2, AQP1, PCK1, GLS, SLC25A10, CA4, CA2, SLC4A4, MDH1	690	23	6879	6.50189	8.14649e-07	4.07325e-08	4.08228e-06
KEGG_PATHWAY	hsa04260:Cardiac muscle contraction	26	2.05371	2.78214e-08	UQCRC2, FXYD2, ATP1B1, UQCRC1, COX7A2, COX7A1, CYC1, COX7C, COX4I1, CYTB, ATP1A1, COX7A2L, UQCRFS1, COX5A, COX5B, UQCRQ, COX6C, UQCR10, UQCR11, COX3, UQCRH, COX2, COX1, COX6B1, COX6A1, UQCRB	690	75	6879	3.45612	7.26135e-06	3.4578e-07	3.63874e-05
KEGG_PATHWAY	hsa00650:Butanoate metabolism	15	1.18483	5.22054e-08	ACSM2B, ACADS, ALDH5A1, EHHADH, ACSM2A, ECHS1, ACAT1, HADHA, ACSM3, L2HGDH, ABAT, BDH2, HADH, BDH1, HMGCL	690	27	6879	5.53865	1.36255e-05	6.19345e-07	6.8279e-05
KEGG_PATHWAY	hsa01212:Fatty acid metabolism	20	1.57978	5.6711e-08	ACAA2, ACOX1, ACADSB, CPT2, ACADM, ACADS, EHHADH, MCAT, ECHS1, ACAT1, HADHA, CPT1A, OXSM, HADHB, ACADVL, PECR, ACSL1, SCD5, HADH, ACAA1	690	48	6879	4.15399	1.48015e-05	6.43546e-07	7.41719e-05
KEGG_PATHWAY	hsa01230:Biosynthesis of amino acids	24	1.89573	2.4271e-07	SHMT1, ACY1, ACO2, ASS1, NAGS, ACO1, CS, ALDOB, SDSL, IDH3B, PAH, PSPH, ASL, GOT2, CTH, IDH3G, GOT1, PHGDH, IDH2, IDH1, GPT, PSAT1, GPT2, PC	690	72	6879	3.32319	6.33453e-05	2.63947e-06	0.000317438
KEGG_PATHWAY	hsa00010:Glycolysis / Gluconeogenesis	23	1.81675	2.57686e-07	LDHB, ALDOB, ADH1C, FBP1, ADH5, ADH1B, ADH6, FBP2, DLAT, PCK2, ALDH3A2, PDHB, PCK1, GALM, ACSS1, G6PC, ALDH7A1, AKR1A1, ALDH1B1, DLD, ALDH2, PDHA1, ALDH9A1	690	67	6879	3.42239	6.72537e-05	2.69024e-06	0.000337025
KEGG_PATHWAY	hsa00350:Tyrosine metabolism	16	1.26382	4.22278e-07	DDC, MAOA, MAOB, ADH1C, ADH5, ADH1B, ADH6, HGD, FAH, FAHD1, GOT2, GOT1, AOX1, GSTZ1, HPD, AOC3	690	35	6879	4.55752	0.000110208	4.23901e-06	0.000552293
KEGG_PATHWAY	hsa00410:beta-Alanine metabolism	15	1.18483	4.70597e-07	ALDH6A1, ACADM, EHHADH, UPB1, ECHS1, DPYS, HADHA, ALDH3A2, ALDH7A1, ALDH1B1, ALDH2, ABAT, HIBCH, ALDH9A1, AOC3	690	31	6879	4.82398	0.000122818	4.5491e-06	0.000615489
KEGG_PATHWAY	hsa00330:Arginine and proline metabolism	19	1.50079	6.82504e-07	GATM, MAOA, HOGA1, SAT2, MAOB, AGMAT, ALDH3A2, CKB, GOT2, ALDH7A1, GOT1, ALDH1B1, ALDH2, PRODH2, ALDH4A1, DAO, OAT, AOC1, ALDH9A1	690	50	6879	3.78843	0.000178118	6.3619e-06	0.000892639
KEGG_PATHWAY	hsa05110:Vibrio cholerae infection	19	1.50079	1.32984e-06	SLC12A2, ATP6V1H, ATP6V1G1, ATP6V1B2, ATP6V1B1, ATP6V1D, ATP6V1F, ATP6V1C1, ATP6V0C, ATP6V1C2, ATP6V1A, TJP1, ATP6V1E1, ATP6V0A1, ATP6V1G3, ATP6V0A4, ATP6V0D1, TJP2, ATP6V0D2	690	52	6879	3.64273	0.000347028	1.19685e-05	0.00173928
KEGG_PATHWAY	hsa00310:Lysine degradation	19	1.50079	1.32984e-06	AADAT, GCDH, DLST, EHHADH, OGDHL, ECHS1, AASS, OGDH, ACAT1, HADHA, PIPOX, BBOX1, ALDH3A2, ALDH7A1, ALDH1B1, TMLHE, ALDH2, HADH, ALDH9A1	690	52	6879	3.64273	0.000347028	1.19685e-05	0.00173928
KEGG_PATHWAY	hsa00220:Arginine biosynthesis	11	0.868878	6.92379e-06	GOT2, GOT1, ACY1, NAGS, ASS1, GLUD2, GLS, GLUD1, GPT, ASL, GPT2	690	20	6879	5.48326	0.00180548	6.02353e-05	0.00905519
KEGG_PATHWAY	hsa00250:Alanine, aspartate and glutamate metabolism	14	1.10585	1.66696e-05	ASS1, ALDH5A1, GLUD2, GLUD1, ASL, AGXT, GOT2, GOT1, GLS, ALDH4A1, ABAT, GPT, AGXT2, GPT2	690	35	6879	3.98783	0.00434134	0.000140338	0.0217998
KEGG_PATHWAY	hsa00360:Phenylalanine metabolism	9	0.7109	0.0001039	GOT2, DDC, GLYAT, GOT1, MAOA, MAOB, PAH, HPD, AOC3	690	17	6879	5.27801	0.0267548	0.000847117	0.135805
KEGG_PATHWAY	hsa04142:Lysosome	27	2.1327	0.000124007	ARSB, NAGLU, AP1M2, GM2A, LGMN, CTSA, GLB1, ATP6V0C, AP1S1, GALNS, NAGA, ATP6V0D1, ATP6V0D2, ATP6V1H, NAPSA, GNS, CTSL, NPC2, GLA, SMPD1, SUMF1, ATP6V0A1, SORT1, CTSC, NEU1, ATP6V0A4, CTSH	690	121	6879	2.22461	0.0318495	0.00098036	0.162066
KEGG_PATHWAY	hsa00340:Histidine metabolism	10	0.789889	0.000144114	AMDHD1, ALDH7A1, ALDH1B1, MAOA, MAOB, FTCD, ALDH2, AOC1, ALDH3A2, ALDH9A1	690	22	6879	4.53162	0.0369178	0.00110576	0.188322
KEGG_PATHWAY	hsa04721:Synaptic vesicle cycle	17	1.34281	0.000349411	STX3, ATP6V1H, ATP6V1G1, ATP6V1B2, ATP6V1B1, ATP6V1D, ATP6V1F, ATP6V1C1, ATP6V0C, ATP6V1C2, ATP6V1A, ATP6V1E1, ATP6V0A1, ATP6V1G3, ATP6V0A4, ATP6V0D1, ATP6V0D2	690	63	6879	2.6902	0.0871761	0.00260267	0.45603
KEGG_PATHWAY	hsa03320:PPAR signaling pathway	17	1.34281	0.000732262	ACOX2, ACOX1, CPT2, ACADM, EHHADH, PCK2, CPT1A, PCK1, ACSL1, CYP27A1, FABP3, FABP1, GK, SCD5, SCP2, SLC27A2, ACAA1	690	67	6879	2.52959	0.174025	0.00529677	0.953496
KEGG_PATHWAY	hsa05120:Epithelial cell signaling in Helicobacter pylori infection	17	1.34281	0.000732262	ATP6V1H, ATP6V1G1, ATP6V1B2, ATP6V1B1, ATP6V1D, ATP6V1F, ATP6V1C1, ATP6V0C, ATP6V1C2, ATP6V1A, TJP1, ATP6V1E1, ATP6V0A1, ATP6V1G3, ATP6V0A4, ATP6V0D1, ATP6V0D2	690	67	6879	2.52959	0.174025	0.00529677	0.953496
KEGG_PATHWAY	hsa03010:Ribosome	27	2.1327	0.000851409	MRPS17, MRPS16, MRPS15, RPL19, MRPS11, MRPS10, MRPL20, MRPL11, MRPL12, MRPL14, MRPL16, MRPL19, MRPL18, MRPL2, MRPL1, MRPL4, MRPL3, MRPS5, MRPL9, MRPS6, MRPS21, MRPS7, MRPL24, MRPL23, MRPL22, MRPS18C, MRPS9	690	136	6879	1.97925	0.199335	0.00599043	1.10784
KEGG_PATHWAY	hsa00053:Ascorbate and aldarate metabolism	10	0.789889	0.000857718	UGT1A9, ALDH7A1, ALDH1B1, MIOX, ALDH2, RGN, UGT2A3, ALDH3A2, ALDH9A1, UGT2B7	690	27	6879	3.69243	0.200653	0.00587636	1.11601
KEGG_PATHWAY	hsa00982:Drug metabolism - cytochrome P450	17	1.34281	0.00087071	GSTA1, GSTA3, MAOA, MAOB, ADH5, ADH1C, ADH1B, GSTT1, ADH6, FMO4, UGT1A9, GSTM3, FMO1, GSTK1, AOX1, UGT2A3, UGT2B7	690	68	6879	2.49239	0.203362	0.00581264	1.13283
KEGG_PATHWAY	hsa00270:Cysteine and methionine metabolism	12	0.947867	0.000900031	GOT2, ADI1, TST, LDHB, CTH, GOT1, AHCY, BHMT, SDSL, MDH2, MDH1, MPST	690	38	6879	3.14828	0.20944	0.00585812	1.17077
KEGG_PATHWAY	hsa04978:Mineral absorption	13	1.02686	0.000956196	FXYD2, ATP1B1, SLC5A1, SLC9A3, ATP1A1, SLC6A19, MT1X, SLC26A6, MT2A, MT1E, MT1H, MT1G, MT1F	690	44	6879	2.94555	0.220955	0.00607141	1.24341
KEGG_PATHWAY	hsa00480:Glutathione metabolism	14	1.10585	0.00118696	GSTA1, GSTA3, GGCT, GSTT1, ANPEP, GGT1, GGT5, GSR, GSTM3, OPLAH, GSTK1, GPX3, IDH2, IDH1	690	51	6879	2.73674	0.266538	0.0073533	1.54133
KEGG_PATHWAY	hsa01040:Biosynthesis of unsaturated fatty acids	9	0.7109	0.00121457	PECR, ACOX1, ACOT7, ACOT2, ACOT1, SCD5, HADHA, ACOT4, ACAA1	690	23	6879	3.90113	0.271812	0.0073495	1.57693
KEGG_PATHWAY	hsa00760:Nicotinate and nicotinamide metabolism	10	0.789889	0.00152631	NMNAT3, NNT, ENPP1, BST1, AOX1, NT5C2, QPRT, NMRK1, PNP, NMNAT1	690	29	6879	3.43778	0.328789	0.00901981	1.97796
KEGG_PATHWAY	hsa00062:Fatty acid elongation	9	0.7109	0.00223613	ACAA2, ACOT7, ACOT2, ECHS1, ACOT1, HADH, HADHA, ACOT4, HADHB	690	25	6879	3.58904	0.442494	0.0129001	2.88544
KEGG_PATHWAY	hsa00980:Metabolism of xenobiotics by cytochrome P450	17	1.34281	0.00225487	GSTA1, GSTA3, ADH5, ADH1C, ADH1B, GSTT1, ADH6, EPHX1, CBR3, UGT1A9, GSTM3, CBR1, GSTK1, AKR7A2, AKR7A3, UGT2A3, UGT2B7	690	74	6879	2.29031	0.445221	0.0127267	2.9093
KEGG_PATHWAY	hsa00670:One carbon pool by folate	8	0.631912	0.00236701	MTHFD1, MTHFS, SHMT1, ALDH1L1, AMT, FTCD, ALDH1L2, MTFMT	690	20	6879	3.98783	0.46126	0.0130738	3.05193
KEGG_PATHWAY	hsa04974:Protein digestion and absorption	19	1.50079	0.0023812	COL4A4, COL18A1, COL4A3, FXYD2, ATP1B1, SLC9A3, SLC3A2, SLC7A8, MME, ATP1A1, SLC3A1, SLC6A19, COL4A6, COL4A5, SLC7A7, XPNPEP2, PRCP, SLC1A1, DPP4	690	88	6879	2.15252	0.463256	0.0128795	3.06996
KEGG_PATHWAY	hsa00970:Aminoacyl-tRNA biosynthesis	15	1.18483	0.0049802	VARS2, FARS2, QARS, WARS2, DARS2, LARS2, IARS2, SARS2, EARS2, QRSL1, PARS2, NARS2, SEPSECS, YARS2, MTFMT	690	66	6879	2.26581	0.728306	0.026243	6.32121
KEGG_PATHWAY	hsa04976:Bile secretion	15	1.18483	0.00751065	FXYD2, ATP1B1, ABCB11, SLC5A1, SLC9A3, SLC22A7, SLC22A8, EPHX1, ATP1A1, ABCB1, AQP1, CA2, ABCC2, SLC51A, SLC4A4	690	69	6879	2.1673	0.860219	0.0385893	9.38968
KEGG_PATHWAY	hsa04122:Sulfur relay system	5	0.394945	0.0127984	TST, TRMU, NFS1, MOCS1, MPST	690	10	6879	4.98478	0.965332	0.0637946	15.5043
KEGG_PATHWAY	hsa05323:Rheumatoid arthritis	17	1.34281	0.0129553	ATP6V1H, ATP6V1B2, ATP6V1G1, ATP6V1B1, ATP6V1D, ATP6V1F, ATP6V1C1, ATP6V0C, CTSL, ATP6V1C2, ATP6V1A, ATP6V1E1, ATP6V0A1, ATP6V1G3, ATP6V0A4, ATP6V0D1, ATP6V0D2	690	88	6879	1.92594	0.966741	0.0633546	15.6798
KEGG_PATHWAY	hsa00040:Pentose and glucuronate interconversions	9	0.7109	0.0140086	UGT1A9, CRYL1, SORD, AKR1A1, KL, UGT2A3, DCXR, UGT2B7, XYLB	690	33	6879	2.71897	0.97483	0.0671153	16.8491
KEGG_PATHWAY	hsa00130:Ubiquinone and other terpenoid-quinone biosynthesis	5	0.394945	0.0185439	COQ3, COQ7, NQO1, COQ5, HPD	690	11	6879	4.53162	0.992444	0.0864984	21.7147
KEGG_PATHWAY	hsa04530:Tight junction	16	1.26382	0.0248609	CLDN8, PRKCZ, CLDN7, OCLN, CLDN19, ACTN4, MAGI1, CLDN3, MPDZ, MPP5, LLGL2, TJP1, CGN, CLDN2, TJP3, TJP2	690	87	6879	1.83348	0.998599	0.112607	28.0547
KEGG_PATHWAY	hsa05204:Chemical carcinogenesis	15	1.18483	0.0263209	GSTA1, GSTA3, ADH5, ADH1C, ADH6, EPHX1, GSTT1, ADH1B, GSTM3, CBR1, UGT1A9, GSTK1, SULT1A2, UGT2A3, UGT2B7	690	80	6879	1.86929	0.999053	0.116901	29.4509
KEGG_PATHWAY	hsa01220:Degradation of aromatic compounds	3	0.236967	0.028055	AKR1A1, ADH5, RGN	690	3	6879	9.96957	0.999405	0.122167	31.0766
KEGG_PATHWAY	hsa00531:Glycosaminoglycan degradation	6	0.473934	0.0351939	GNS, ARSB, HYAL1, NAGLU, GALNS, GLB1	690	19	6879	3.14828	0.999913	0.148901	37.4118
KEGG_PATHWAY	hsa00471:D-Glutamine and D-glutamate metabolism	3	0.236967	0.052406	GLUD2, GLS, GLUD1	690	4	6879	7.47717	0.999999	0.211896	50.5411
KEGG_PATHWAY	hsa00860:Porphyrin and chlorophyll metabolism	9	0.7109	0.0537811	ALAD, UGT1A9, FECH, FXN, PPOX, UGT2A3, MMAB, UGT2B7, EARS2	690	42	6879	2.13634	0.999999	0.213745	51.4716
KEGG_PATHWAY	hsa00561:Glycerolipid metabolism	11	0.868878	0.0602229	ALDH7A1, GLA, AKR1A1, ALDH1B1, ALDH2, GK, LPIN2, AGPAT3, AGK, ALDH3A2, ALDH9A1	690	58	6879	1.89078	1	0.233377	55.6193
KEGG_PATHWAY	hsa00072:Synthesis and degradation of ketone bodies	4	0.315956	0.0703285	BDH2, BDH1, ACAT1, HMGCL	690	10	6879	3.98783	1	0.26434	61.4714
KEGG_PATHWAY	hsa00052:Galactose metabolism	7	0.552923	0.07321	GALK1, GALM, G6PC, GLA, MGAM, GALT, GLB1	690	30	6879	2.32623	1	0.270192	63.0043
KEGG_PATHWAY	hsa00590:Arachidonic acid metabolism	11	0.868878	0.0796756	GGT5, PLA2G4A, CBR1, PTGES2, PTGDS, GPX3, EPHX2, GGT1, CYP4F3, CBR3, CYP4F2	690	61	6879	1.79779	1	0.287235	66.2413
KEGG_PATHWAY	hsa00400:Phenylalanine, tyrosine and tryptophan biosynthesis	3	0.236967	0.0816296	GOT2, GOT1, PAH	690	5	6879	5.98174	1	0.289601	67.1668
KEGG_PATHWAY	hsa00910:Nitrogen metabolism	5	0.394945	0.0827813	GLUD2, GLUD1, CA5B, CA4, CA2	690	17	6879	2.93223	1	0.289445	67.7012
KEGG_PATHWAY	hsa00450:Selenocompound metabolism	5	0.394945	0.0827813	SEPHS2, CTH, SCLY, SEPSECS, TXNRD2	690	17	6879	2.93223	1	0.289445	67.7012
KEGG_PATHWAY	hsa00051:Fructose and mannose metabolism	7	0.552923	0.0944745	KHK, SORD, PFKFB2, ALDOB, FBP1, FBP2, ENOSF1	690	32	6879	2.18084	1	0.320631	72.6909

## Sheet: Kidney specific proteins
Gene Symbol	ccRCC_80_T	ccRCC_196_T	ccRCC_132_T	ccRCC_36_T	ccRCC_109_T	ccRCC_19_T	ccRCC_225_T	ccRCC_155_T	ccRCC_156_T	ccRCC_214_T	ccRCC_230_T	ccRCC_208_T	ccRCC_216_T	ccRCC_161_T	ccRCC_158_T	ccRCC_157_T	ccRCC_146_T	ccRCC_145_T	ccRCC_138_T	ccRCC_144_T	ccRCC_192_T	ccRCC_39_T	ccRCC_97_T	ccRCC_98_T	ccRCC_181_T	ccRCC_133_T	ccRCC_17_T	ccRCC_54_T	ccRCC_187_T	ccRCC_62_T	ccRCC_205_T	ccRCC_207_T	ccRCC_46_T	ccRCC_86_T	ccRCC_95_T	ccRCC_89_T	ccRCC_91_T	ccRCC_153_T	ccRCC_139_T	ccRCC_154_T	ccRCC_209_T	ccRCC_204_T	ccRCC_213_T	ccRCC_151_T	ccRCC_228_T	ccRCC_69_T	ccRCC_77_T	ccRCC_203_T	ccRCC_190_T
AQP2	-0.730249	-0.725435	-0.700151	-0.685441	-0.706637	-0.722206	-0.73422	-0.696526	-0.68185	-0.715088	-0.710052	-0.722257	-0.709512	-0.729065	-0.705918	-0.675566	-0.724139	-0.68733	-0.723058	-0.683746	-0.605701	-0.692801	-0.719804	-0.732169	-0.679157	-0.648418	-0.677984	-0.701273	-0.732602	-0.714895	-0.72107	-0.667474	-0.704112	-0.685313	-0.723921	-0.713977	-0.713055	-0.684678	-0.720953	-0.658274	-0.701483	-0.724782	-0.709065	-0.639325	-0.677227	-0.704697	-0.722939	-0.727471	-0.640214
ATP6V0D2	-0.704094	-0.802979	-0.697811	-0.306886	-0.631427	-0.725762	-0.815592	-0.650537	-0.680689	-0.77801	-0.658723	-0.833708	-0.723626	-0.802825	-0.784048	-0.781716	-0.835124	-0.794365	-0.755152	-0.764272	-0.123727	-0.715065	-0.826373	-0.75555	-0.690148	-0.301044	-0.620112	-0.524457	-0.785327	-0.803098	-0.841514	-0.708609	-0.757573	-0.682783	-0.66309	-0.608213	-0.46288	-0.6676	-0.787779	-0.554888	-0.751719	-0.812504	-0.737119	-0.576038	-0.423971	-0.718813	-0.648764	-0.826938	-0.498178
NPHS1	-0.587419	-0.587419	-0.587419	-0.587419	-0.587419	-0.587419	-0.587419	-0.546082	-0.587419	-0.587419	-0.587419	-0.587419	-0.587419	-0.587419	-0.587419	-0.587419	-0.587419	-0.587419	-0.587419	-0.587419	-0.587419	-0.587419	-0.587419	-0.587419	-0.587419	-0.587419	-0.587419	-0.587419	-0.587419	-0.587419	-0.587419	-0.587419	-0.587419	-0.587419	-0.587419	-0.587419	-0.587419	-0.587419	-0.587419	-0.587419	-0.587419	-0.587419	-0.587419	-0.563297	-0.587419	-0.587419	-0.587419	-0.587419	-0.587419
NPHS2	-0.643538	-0.643538	-0.643538	-0.643538	-0.643538	-0.643538	-0.643538	-0.510473	-0.643538	-0.643538	-0.643538	-0.643538	-0.643538	-0.643538	-0.643538	-0.643538	-0.643538	-0.643538	-0.643538	-0.643538	-0.643538	-0.643538	-0.643538	-0.643538	-0.643538	-0.643538	-0.643538	-0.643538	-0.643538	-0.643538	-0.643538	-0.643538	-0.643538	-0.643538	-0.643538	-0.643538	-0.643538	-0.643538	-0.643538	-0.643538	-0.643538	-0.643538	-0.643538	-0.643538	-0.643538	-0.643538	-0.643538	-0.643538	-0.643538
FGF1	-0.631153	-0.631153	-0.630293	-0.631153	-0.631153	-0.631153	-0.631153	-0.619073	-0.631153	-0.631153	-0.631153	-0.631153	-0.631153	-0.631056	-0.629917	-0.631153	-0.631153	-0.631153	-0.631031	-0.631004	-0.631153	-0.631153	-0.631153	-0.630788	-0.631056	-0.631059	-0.631153	-0.631153	-0.631153	-0.630482	-0.631153	-0.631153	-0.631153	-0.630728	-0.631153	-0.631153	-0.631153	-0.631153	-0.631153	-0.630924	-0.631153	-0.630813	-0.63076	-0.631153	-0.631153	-0.631153	-0.63098	-0.630977	-0.631153
LRP2	-0.625702	-0.658646	-0.619566	-0.548394	-0.706457	-0.700578	-0.693316	-0.642164	-0.639948	-0.684111	-0.657742	-0.698138	-0.672573	-0.66843	-0.694345	-0.691458	-0.661255	-0.632908	-0.629833	-0.61522	-0.604692	-0.674934	-0.680857	-0.675994	-0.611384	-0.636377	-0.593975	-0.63172	-0.696252	-0.657073	-0.673367	-0.54902	-0.520232	-0.688363	-0.650661	-0.691337	-0.61801	-0.663874	-0.651212	-0.670337	-0.650377	-0.663865	-0.618767	-0.613409	-0.558829	-0.503134	-0.518817	-0.612487	-0.613125
GGT1	-0.62873	-0.59139	1.94115	-0.62873	-0.577288	-0.569939	-0.62873	-0.147287	-0.62873	-0.570535	-0.567755	-0.62873	-0.62873	0.016372	0.739529	-0.62873	0.341505	-0.594171	1.25513	-0.0110368	-0.592979	-0.62873	-0.609662	-0.596951	1.25553	-0.575302	-0.446798	-0.62873	-0.62873	-0.620586	-0.604498	-0.325643	-0.588013	-0.58424	-0.459112	-0.613833	-0.598739	0.645982	-0.413034	-0.359209	-0.62873	-0.541339	-0.461297	-0.61999	-0.551667	-0.305384	-0.617806	-0.587219	-0.601321
DPYS	-0.345137	-0.345137	-0.345137	-0.294201	-0.345137	-0.345137	-0.327465	-0.345137	-0.227372	-0.345137	-0.345137	-0.345137	-0.345137	-0.266426	-0.107436	-0.345137	-0.295498	-0.265039	-0.345137	-0.295558	-0.319865	-0.345137	-0.345137	-0.345137	-0.345137	-0.271071	-0.345137	0.273032	-0.345137	-0.345137	0.285276	-0.345137	-0.345137	-0.325053	-0.345137	-0.345137	-0.345137	-0.00203518	-0.286722	-0.157015	-0.345137	-0.345137	-0.18859	-0.345137	-0.345137	0.098118	-0.345137	0.0853915	-0.345137
BHMT	-0.810103	-0.810409	-0.689533	-0.757062	-0.815429	-0.807363	-0.808994	-0.767442	-0.752202	-0.734836	-0.753938	-0.816489	-0.76434	-0.719686	-0.721631	-0.796222	-0.809287	-0.796814	-0.810974	-0.78414	-0.817521	-0.816851	-0.816531	-0.808618	-0.791732	-0.761837	-0.763448	-0.797581	-0.800182	-0.815541	-0.813742	-0.777551	-0.71657	-0.812292	-0.785813	-0.65809	-0.791321	-0.781372	-0.780159	-0.732305	-0.809008	-0.816524	-0.814418	-0.815945	-0.724259	-0.74203	-0.788623	-0.816001	-0.795322
AGMAT	-0.735938	-0.661974	-0.670322	-0.698131	-0.694297	-0.670807	-0.742247	-0.636203	-0.554668	-0.734531	-0.633048	-0.740743	-0.680805	-0.692016	-0.706479	-0.694297	-0.726668	-0.583933	-0.585535	-0.702305	-0.611839	-0.744965	-0.727251	-0.728561	-0.684542	-0.744965	-0.651297	-0.684784	-0.714923	-0.597474	-0.532974	-0.667555	-0.505067	-0.696141	-0.604705	-0.744965	-0.524869	-0.664255	-0.716719	-0.644017	-0.695996	-0.744965	-0.576071	-0.718709	-0.458427	-0.561608	-0.714195	-0.518365	-0.678815
SLC22A13	-0.667555	-0.667555	-0.667555	-0.667555	-0.667555	-0.667555	-0.667555	-0.657867	-0.667555	-0.667555	-0.667555	-0.667555	-0.667555	-0.667555	-0.667555	-0.667555	-0.667555	-0.649413	-0.667555	-0.667555	-0.635653	-0.667555	-0.667555	-0.667555	-0.667555	-0.667555	-0.667555	-0.667555	-0.667555	-0.667555	-0.667555	-0.667555	-0.667555	-0.667555	-0.667555	-0.667555	-0.667555	-0.667555	-0.667555	-0.667555	-0.667555	-0.667555	-0.667555	-0.59721	-0.65546	-0.667555	-0.667555	-0.667555	-0.665086
SLC22A8	-0.612465	-0.612465	-0.612465	-0.612465	-0.612465	-0.612465	-0.612465	-0.595618	-0.612465	-0.612465	-0.612465	-0.612465	-0.612465	-0.612465	-0.612465	-0.612465	-0.612465	-0.612465	-0.612465	-0.612465	-0.612465	-0.612465	-0.612465	-0.612465	-0.612465	-0.612465	-0.612465	-0.612465	-0.612465	-0.612465	-0.612465	-0.612465	-0.612465	-0.612465	-0.612465	-0.612465	-0.612465	-0.612465	-0.612465	-0.612465	-0.612465	-0.612465	-0.612465	-0.612465	-0.612465	-0.612465	-0.612465	-0.612465	-0.612465
HRSP12	1.03342	-0.108463	0.862728	-0.627088	0.779596	0.778874	-0.5867	0.39794	0.238046	0.292256	1.11727	0.187521	0.790285	0.577492	0.895975	0.745075	0.897077	1.0569	0.371068	0.885926	1.13988	0.720986	-0.939302	0.255273	0.507856	0.935507	1.33244	1.09691	0.264818	0.146128	0.369216	0.100371	0.801404	0.544068	0.786751	0.845098	1.12057	1.54407	1.22272	1.46389	0.691081	-0.0649968	0.356026	0.857332	1.23045	0.071882	0.158362	-0.0305841	1.48001
UMOD	-0.310571	-0.310571	-0.310571	-0.310571	-0.310571	-0.310571	-0.310571	-0.243141	-0.310571	-0.310571	-0.310571	-0.310571	-0.310571	-0.310571	-0.310571	-0.310571	-0.310571	-0.310571	-0.310571	-0.310571	-0.310571	-0.310571	-0.310571	-0.310571	-0.310571	-0.30846	-0.310571	-0.310571	-0.310571	-0.310571	-0.310571	-0.310571	-0.310571	-0.310571	-0.310571	-0.310571	-0.310571	-0.310571	-0.310571	-0.310571	-0.310571	-0.310571	-0.310571	-0.310571	-0.310571	-0.310571	-0.310571	-0.310571	-0.310571
CALB1	-0.406878	-0.406878	-0.406878	-0.406878	-0.406878	-0.406878	-0.406878	-0.406878	-0.406878	-0.406878	-0.406878	-0.406878	-0.406878	-0.406878	-0.406878	-0.406878	-0.406878	-0.406878	-0.406878	-0.406878	-0.406878	-0.406878	-0.406878	-0.406878	-0.406878	-0.406878	-0.406878	-0.18533	-0.406878	-0.406878	-0.188588	-0.406878	-0.406878	-0.406878	-0.406878	-0.406878	-0.406878	-0.406878	-0.406878	-0.406878	-0.406878	-0.406878	-0.406878	-0.406878	0.16654	-0.406878	-0.406878	-0.406878	-0.406878
SLC12A1	-0.698297	-0.698297	-0.694076	-0.698297	-0.698297	-0.698297	-0.698297	-0.226983	-0.694604	-0.616867	-0.698297	-0.698297	-0.686931	-0.698297	-0.698297	-0.698297	-0.698297	-0.698297	-0.636865	-0.698297	-0.698297	-0.698297	-0.698297	-0.698297	-0.698297	-0.698297	-0.685109	-0.698297	-0.698297	-0.675565	-0.698297	-0.674606	-0.698297	-0.698297	-0.698297	-0.698297	-0.185309	-0.622862	-0.698297	-0.698297	-0.695131	-0.698297	-0.698297	-0.634946	-0.6853	-0.625643	-0.698297	-0.68554	-0.690959
SLC12A3	-0.441309	-0.441309	-0.441309	-0.441309	-0.441309	-0.441309	-0.441309	-0.441309	-0.441309	-0.441309	-0.441309	-0.441309	-0.441309	-0.441309	-0.441309	-0.441309	-0.441309	-0.389697	-0.441309	-0.441309	-0.441309	-0.441309	-0.441309	-0.441309	-0.441309	-0.441309	-0.441309	-0.441309	-0.441309	-0.441309	-0.441309	-0.441309	-0.441309	-0.441309	-0.441309	-0.441309	-0.441309	-0.441309	-0.441309	-0.441309	-0.441309	-0.441309	-0.441309	-0.441309	-0.441309	-0.441309	-0.441309	-0.441309	-0.441309
[truncated: 415 more columns]
