# Supplementary material for: A Proteogenomic Atlas of Clear Cell Renal Cell Carcinoma in a Chinese Population
Source: Research Square preprint supplement (doi:10.21203/rs.3.rs-221123/v1), 2021-02-26
Supplement: Supplementary file 9 [file 7cb2411902e21037b32592ac.xlsx]

## Sheet: Description
Table S7: Differentially expressed proteins of each subtypes and relevant enriched pathways; Related to Figure 5, S9.
Subtype	Proteomic subtype and corresponding CPTAC immune subtype
COSMIC	Separate decomposition of mutation spectra of the three proteomic subtypes
differential genetic events	differential significant arm-level CNA events and somatic mutations among three subtypes
GP1_proteins	specific up-regulated/down-regulated proteins in GP1
GP2_proteins	specific up-regulated/down-regulated proteins in GP2
GP3_proteins	specific up-regulated/down-regulated proteins in GP3
GP1_pathways	GP1 up-regulated/down-regulated pathways
GP2_pathways	GP2 up-regulated/down-regulated pathways
GP3_pathways	GP3 up-regulated/down-regulated pathways
Deconvolution	ESTIMATE analysis results; CD8 cluster, APM and immunosuppression scores
drug targets	identified drug targets for GP1 patients

## Sheet: Subtype
ccRCC No.	Subtype	CPTAC immune subtype
ccRCC-60	GP2	Metabolic immune-desert
ccRCC-62	GP2	Metabolic immune-desert
ccRCC-69	GP2	Metabolic immune-desert
ccRCC-71	GP3	CD8- inflamed
ccRCC-73	GP2	CD8- inflamed
ccRCC-74	GP3	CD8- inflamed
ccRCC-77	GP2	CD8+ inflamed
ccRCC-82	GP3	CD8- inflamed
ccRCC-86	GP2	Metabolic immune-desert
ccRCC-90	GP3	Metabolic immune-desert
ccRCC-92	GP3	Metabolic immune-desert
ccRCC-93	GP3	CD8- inflamed
ccRCC-97	GP2	Metabolic immune-desert
ccRCC-98	GP2	CD8+ inflamed
ccRCC-100	GP2	VEGF immune-desert
ccRCC-105	GP3	CD8- inflamed
ccRCC-110	GP3	CD8- inflamed
ccRCC-117	GP1	CD8- inflamed
ccRCC-120	GP3	VEGF immune-desert
ccRCC-121	GP2	Metabolic immune-desert
ccRCC-122	GP3	CD8- inflamed
ccRCC-129	GP3	CD8- inflamed
ccRCC-133	GP2	Metabolic immune-desert
ccRCC-135	GP3	CD8- inflamed
ccRCC-136	GP3	CD8- inflamed
ccRCC-140	GP2	Metabolic immune-desert
ccRCC-141	GP2	Metabolic immune-desert
ccRCC-147	GP2	CD8- inflamed
ccRCC-148	GP1	Metabolic immune-desert
ccRCC-149	GP1	CD8+ inflamed
ccRCC-151	GP2	Metabolic immune-desert
ccRCC-152	GP2	CD8- inflamed
ccRCC-155	GP2	CD8- inflamed
ccRCC-156	GP2	Metabolic immune-desert
ccRCC-159	GP3	VEGF immune-desert
ccRCC-160	GP2	Metabolic immune-desert
ccRCC-162	GP1	CD8+ inflamed
ccRCC-163	GP2	CD8- inflamed
ccRCC-165	GP3	CD8- inflamed
ccRCC-167	GP2	Metabolic immune-desert
ccRCC-169	GP1	CD8+ inflamed
ccRCC-172	GP2	Metabolic immune-desert
ccRCC-174	GP2	Metabolic immune-desert
ccRCC-176	GP2	Metabolic immune-desert
ccRCC-180	GP2	Metabolic immune-desert
ccRCC-181	GP2	Metabolic immune-desert
ccRCC-183	GP2	Metabolic immune-desert
ccRCC-185	GP2	VEGF immune-desert
ccRCC-186	GP2	Metabolic immune-desert
ccRCC-187	GP2	CD8+ inflamed
ccRCC-191	GP3	CD8- inflamed
ccRCC-192	GP2	Metabolic immune-desert
ccRCC-194	GP3	CD8- inflamed
ccRCC-202	GP2	CD8- inflamed
ccRCC-210	GP3	CD8- inflamed
ccRCC-211	GP2	CD8- inflamed
ccRCC-212	GP3	CD8- inflamed
ccRCC-215	GP3	CD8- inflamed
ccRCC-219	GP2	Metabolic immune-desert
ccRCC-220	GP2	Metabolic immune-desert
ccRCC-222	GP3	CD8- inflamed
ccRCC-223	GP3	CD8- inflamed
ccRCC-225	GP2	CD8+ inflamed
ccRCC-227	GP2	CD8+ inflamed
ccRCC-9	GP3	CD8+ inflamed
ccRCC-16	GP1	CD8+ inflamed
ccRCC-17	GP2	Metabolic immune-desert
ccRCC-19	GP2	Metabolic immune-desert
ccRCC-35	GP3	CD8- inflamed
ccRCC-36	GP2	Metabolic immune-desert
ccRCC-38	GP1	Metabolic immune-desert
ccRCC-39	GP2	Metabolic immune-desert
ccRCC-40	GP3	Metabolic immune-desert
ccRCC-48	GP3	CD8- inflamed
ccRCC-53	GP3	CD8- inflamed
ccRCC-55	GP3	CD8- inflamed
ccRCC-56	GP1	CD8+ inflamed
ccRCC-57	GP1	CD8- inflamed
ccRCC-59	GP1	CD8- inflamed
ccRCC-63	GP3	Metabolic immune-desert
ccRCC-65	GP3	CD8+ inflamed
ccRCC-66	GP3	CD8- inflamed
ccRCC-68	GP3	CD8- inflamed
ccRCC-70	GP3	CD8+ inflamed
ccRCC-72	GP2	Metabolic immune-desert
ccRCC-75	GP3	CD8- inflamed
ccRCC-76	GP3	VEGF immune-desert
ccRCC-78	GP1	CD8+ inflamed
ccRCC-79	GP3	CD8- inflamed
ccRCC-80	GP2	Metabolic immune-desert
ccRCC-81	GP2	Metabolic immune-desert
ccRCC-84	GP3	Metabolic immune-desert
ccRCC-85	GP3	CD8- inflamed
ccRCC-87	GP3	CD8- inflamed
ccRCC-88	GP3	Metabolic immune-desert
ccRCC-91	GP2	Metabolic immune-desert
ccRCC-95	GP2	Metabolic immune-desert
ccRCC-96	GP3	CD8- inflamed
ccRCC-101	GP2	CD8+ inflamed
ccRCC-106	GP3	CD8- inflamed
ccRCC-108	GP2	Metabolic immune-desert
ccRCC-112	GP2	Metabolic immune-desert
ccRCC-113	GP3	CD8- inflamed
ccRCC-114	GP3	CD8- inflamed
ccRCC-116	GP3	CD8- inflamed
ccRCC-118	GP3	Metabolic immune-desert
ccRCC-119	GP2	Metabolic immune-desert
ccRCC-123	GP3	CD8- inflamed
ccRCC-125	GP3	CD8- inflamed
ccRCC-126	GP3	Metabolic immune-desert
ccRCC-127	GP3	CD8- inflamed
ccRCC-128	GP3	CD8- inflamed
ccRCC-130	GP3	Metabolic immune-desert
ccRCC-132	GP2	CD8- inflamed
ccRCC-134	GP3	VEGF immune-desert
ccRCC-137	GP1	CD8+ inflamed
ccRCC-138	GP2	CD8- inflamed
ccRCC-139	GP2	Metabolic immune-desert
ccRCC-143	GP1	CD8- inflamed
ccRCC-144	GP2	Metabolic immune-desert
ccRCC-145	GP2	Metabolic immune-desert
ccRCC-146	GP2	Metabolic immune-desert
ccRCC-150	GP3	CD8- inflamed
ccRCC-153	GP2	Metabolic immune-desert
ccRCC-154	GP2	Metabolic immune-desert
ccRCC-157	GP2	Metabolic immune-desert
ccRCC-158	GP2	Metabolic immune-desert
ccRCC-161	GP2	Metabolic immune-desert
ccRCC-164	GP3	CD8- inflamed
ccRCC-168	GP2	Metabolic immune-desert
ccRCC-170	GP2	CD8- inflamed
ccRCC-173	GP3	Metabolic immune-desert
ccRCC-175	GP2	Metabolic immune-desert
ccRCC-177	GP3	Metabolic immune-desert
ccRCC-178	GP2	CD8+ inflamed
ccRCC-179	GP1	Metabolic immune-desert
ccRCC-182	GP3	CD8- inflamed
ccRCC-184	GP3	CD8- inflamed
ccRCC-188	GP2	CD8+ inflamed
ccRCC-190	GP2	Metabolic immune-desert
ccRCC-193	GP2	Metabolic immune-desert
ccRCC-195	GP2	Metabolic immune-desert
ccRCC-196	GP2	Metabolic immune-desert
ccRCC-197	GP2	Metabolic immune-desert
ccRCC-199	GP1	CD8+ inflamed
ccRCC-200	GP3	CD8- inflamed
ccRCC-201	GP3	CD8- inflamed
ccRCC-204	GP2	CD8+ inflamed
ccRCC-205	GP2	Metabolic immune-desert
ccRCC-206	GP3	CD8- inflamed
ccRCC-207	GP2	Metabolic immune-desert
ccRCC-208	GP2	VEGF immune-desert
ccRCC-209	GP2	Metabolic immune-desert
ccRCC-213	GP2	Metabolic immune-desert
ccRCC-214	GP2	CD8- inflamed
ccRCC-216	GP2	CD8- inflamed
ccRCC-224	GP3	Metabolic immune-desert
ccRCC-89	GP2	CD8- inflamed
ccRCC-20	GP2	CD8- inflamed
ccRCC-21	GP2	Metabolic immune-desert
ccRCC-27	GP3	CD8- inflamed
ccRCC-32	GP2	CD8+ inflamed
ccRCC-34	GP3	CD8- inflamed
ccRCC-107	GP1	CD8+ inflamed
ccRCC-104	GP1	CD8+ inflamed
ccRCC-103	GP1	CD8- inflamed
ccRCC-102	GP2	Metabolic immune-desert
ccRCC-99	GP1	CD8- inflamed
ccRCC-94	GP1	CD8- inflamed
ccRCC-83	GP1	CD8+ inflamed
ccRCC-67	GP1	CD8- inflamed
ccRCC-64	GP1	CD8- inflamed
ccRCC-61	GP1	Metabolic immune-desert
ccRCC-58	GP1	CD8+ inflamed
ccRCC-52	GP1	Metabolic immune-desert
ccRCC-50	GP1	CD8- inflamed
ccRCC-49	GP1	VEGF immune-desert
ccRCC-47	GP1	Metabolic immune-desert
ccRCC-43	GP1	Metabolic immune-desert
ccRCC-41	GP3	CD8- inflamed
ccRCC-33	GP1	Metabolic immune-desert
ccRCC-30	GP1	CD8+ inflamed
ccRCC-29	GP1	Metabolic immune-desert
ccRCC-26	GP1	Metabolic immune-desert
ccRCC-25	GP1	CD8- inflamed
ccRCC-24	GP1	Metabolic immune-desert
ccRCC-22	GP1	CD8+ inflamed
ccRCC-18	GP1	CD8+ inflamed
ccRCC-13	GP1	CD8+ inflamed
ccRCC-12	GP1	Metabolic immune-desert
ccRCC-11	GP1	CD8+ inflamed
ccRCC-8	GP2	Metabolic immune-desert
ccRCC-7	GP2	Metabolic immune-desert
ccRCC-6	GP3	CD8- inflamed
ccRCC-5	GP1	CD8- inflamed
ccRCC-4	GP1	CD8- inflamed
ccRCC-3	GP1	Metabolic immune-desert
ccRCC-2	GP3	CD8+ inflamed
ccRCC-1	GP1	CD8+ inflamed
ccRCC-109	GP2	CD8- inflamed
ccRCC-111	GP2	CD8+ inflamed
ccRCC-115	GP1	Metabolic immune-desert
ccRCC-124	GP1	CD8- inflamed
ccRCC-131	GP2	Metabolic immune-desert
ccRCC-142	GP1	CD8+ inflamed
ccRCC-166	GP2	Metabolic immune-desert
ccRCC-171	GP1	Metabolic immune-desert
ccRCC-189	GP3	Metabolic immune-desert
ccRCC-198	GP2	CD8+ inflamed
ccRCC-231	GP3	CD8- inflamed
ccRCC-232	GP3	CD8- inflamed
ccRCC-10	GP3	CD8- inflamed
ccRCC-14	GP3	CD8- inflamed
ccRCC-15	GP3	CD8- inflamed
ccRCC-23	GP1	Metabolic immune-desert
ccRCC-28	GP2	CD8- inflamed
ccRCC-31	GP3	Metabolic immune-desert
ccRCC-42	GP3	CD8- inflamed
ccRCC-44	GP3	CD8- inflamed
ccRCC-45	GP1	CD8+ inflamed
ccRCC-46	GP2	CD8+ inflamed
ccRCC-51	GP2	Metabolic immune-desert
ccRCC-54	GP2	Metabolic immune-desert
ccRCC-37	GP1	CD8- inflamed
ccRCC-226	GP1	CD8- inflamed
ccRCC-228	GP2	Metabolic immune-desert
ccRCC-229	GP2	CD8- inflamed
ccRCC-230	GP2	VEGF immune-desert
ccRCC-203	GP2	Metabolic immune-desert
ccRCC-217	GP1	CD8+ inflamed
ccRCC-218	GP3	Metabolic immune-desert
ccRCC-221	GP1	CD8+ inflamed

## Sheet: COSMIC
GP1 samples	SBS1	SBS5	SBS22	SBS23	SBS40		GP2 samples	SBS1	SBS5	SBS22	SBS40	SBS52		GP3 sample	SBS1	SBS5	SBS22	SBS40
ccRCC-103	11	64	0	0	0		ccRCC-100	10	73	0	0	0		ccRCC-105_snv_HC	5	10	0	81
ccRCC-104	16	127	317	0	0		ccRCC-101	6	42	0	0	0		ccRCC-106_snv_HC	0	1	0	7
ccRCC-107	7	14	0	0	64		ccRCC-102	6	18	0	26	0		ccRCC-10_snv_HC	12	36	0	114
ccRCC-115	14	181	0	0	0		ccRCC-108	8	21	0	43	0		ccRCC-110_snv_HC	13	27	0	34
ccRCC-117	17	38	0	0	74		ccRCC-109	12	49	0	80	0		ccRCC-113_snv_HC	2	22	0	48
ccRCC-11	0	0	0	0	3		ccRCC-111	5	35	0	78	0		ccRCC-114_snv_HC	3	7	0	75
ccRCC-124	5	15	0	0	40		ccRCC-112	6	5	21	88	0		ccRCC-116_snv_HC	14	19	0	72
ccRCC-12	22	21	0	19	53		ccRCC-119	10	27	178	155	0		ccRCC-118_snv_HC	6	17	0	104
ccRCC-137	7	187	0	0	0		ccRCC-121	19	217	0	0	0		ccRCC-120_snv_HC	3	92	42	0
ccRCC-142	17	38	0	0	77		ccRCC-131	18	28	0	75	0		ccRCC-122_snv_HC	0	2	3	0
ccRCC-143	0	0	0	0	1		ccRCC-132	44	559	0	0	0		ccRCC-123_snv_HC	11	33	0	39
ccRCC-148	2	39	0	0	0		ccRCC-133	6	0	0	64	0		ccRCC-125_snv_HC	4	51	0	0
ccRCC-149	6	0	0	0	90		ccRCC-138	19	305	0	0	0		ccRCC-126_snv_HC	3	40	0	53
ccRCC-162	10	51	0	0	104		ccRCC-139	12	47	0	54	0		ccRCC-127_snv_HC	3	14	13	0
ccRCC-169	14	34	0	0	69		ccRCC-140	6	23	56	80	0		ccRCC-128_snv_HC	7	62	0	0
ccRCC-16	16	1	0	0	86		ccRCC-141	15	29	0	50	0		ccRCC-129_snv_HC	13	32	0	85
ccRCC-171	8	95	31	0	0		ccRCC-144	13	0	0	65	0		ccRCC-130_snv_HC	6	180	126	0
ccRCC-179	4	97	0	0	0		ccRCC-145	12	33	0	96	0		ccRCC-134_snv_HC	52	588	0	0
ccRCC-18	3	79	0	0	0		ccRCC-146	25	49	0	62	0		ccRCC-135_snv_HC	15	0	28	76
ccRCC-199	0	0	0	0	11		ccRCC-147	14	22	0	39	0		ccRCC-136_snv_HC	12	34	248	0
ccRCC-1	9	0	0	0	63		ccRCC-151	18	414	0	451	0		ccRCC-14_snv_HC	12	70	133	0
ccRCC-217	10	16	0	0	67		ccRCC-152	15	34	0	46	0		ccRCC-150_snv_HC	6	32	0	89
ccRCC-221	6	33	0	0	53		ccRCC-153	38	560	0	0	0		ccRCC-159_snv_HC	3	0	0	34
ccRCC-23	14	247	0	0	0		ccRCC-154	14	66	0	101	0		ccRCC-15_snv_HC	11	43	0	117
ccRCC-24	5	32	0	10	38		ccRCC-156	7	119	0	0	0		ccRCC-164_snv_HC	3	66	0	0
ccRCC-25	3	0	0	13	43		ccRCC-157	9	95	0	95	0		ccRCC-165_snv_HC	5	12	0	77
ccRCC-26	9	32	0	0	84		ccRCC-158	10	24	0	87	0		ccRCC-173_snv_HC	5	3	0	48
ccRCC-30	4	8	42	0	76		ccRCC-160	5	146	0	0	0		ccRCC-177_snv_HC	2	62	0	82
ccRCC-33	7	9	0	0	30		ccRCC-161	0	88	57	0	0		ccRCC-182_snv_HC	8	151	0	0
ccRCC-37	0	6	0	9	17		ccRCC-163	11	89	0	0	0		ccRCC-184_snv_HC	0	56	0	0
ccRCC-38	7	33	0	0	35		ccRCC-166	11	0	21	76	0		ccRCC-189_snv_HC	0	0	124	135
ccRCC-43	25	63	0	37	74		ccRCC-167	3	69	0	0	0		ccRCC-191_snv_HC	6	0	0	55
ccRCC-45	12	100	0	0	0		ccRCC-168	3	9	0	0	0		ccRCC-201_snv_HC	6	18	33	0
ccRCC-47	14	46	51	0	124		ccRCC-170	6	8	0	0	0		ccRCC-210_snv_HC	5	7	0	38
ccRCC-50	0	13	0	0	0		ccRCC-172	14	9	0	88	0		ccRCC-212_snv_HC	8	21	0	36
ccRCC-52	12	36	0	0	97		ccRCC-174	4	14	0	41	0		ccRCC-215_snv_HC	0	100	0	0
ccRCC-56	11	3	0	0	76		ccRCC-175	16	38	0	98	0		ccRCC-218_snv_HC	9	12	0	82
ccRCC-57	5	101	0	0	0		ccRCC-176	12	83	0	0	0		ccRCC-223_snv_HC	11	22	0	61
ccRCC-58	10	24	0	0	80		ccRCC-178	10	40	0	84	0		ccRCC-224_snv_HC	13	92	0	0
ccRCC-59	11	81	0	0	0		ccRCC-180	7	37	0	43	0		ccRCC-231_snv_HC	7	32	0	38
ccRCC-5	26	38	0	26	140		ccRCC-181	0	0	0	4	0		ccRCC-232_snv_HC	9	35	0	77
ccRCC-61	14	157	0	0	0		ccRCC-183	4	28	0	84	0		ccRCC-27_snv_HC	3	52	0	0
ccRCC-64	3	117	0	0	0		ccRCC-185	8	2	0	164	0		ccRCC-2_snv_HC	12	5	0	65
ccRCC-67	9	87	0	0	0		ccRCC-186	22	30	0	44	0		ccRCC-31_snv_HC	17	1	0	53
ccRCC-78	0	2	0	1	0		ccRCC-187	5	132	0	0	0		ccRCC-34_snv_HC	12	0	56	89
ccRCC-83	0	0	9	0	31		ccRCC-188	8	64	317	0	0		ccRCC-35_snv_HC	4	15	0	18
ccRCC-94	15	0	92	0	91		ccRCC-193	0	0	0	32	0		ccRCC-40_snv_HC	0	0	18	104
							ccRCC-195	20	35	0	64	0		ccRCC-42_snv_HC	0	0	250	159
							ccRCC-196	14	10	0	84	0		ccRCC-44_snv_HC	13	66	0	0
							ccRCC-197	11	107	0	0	0		ccRCC-48_snv_HC	0	65	0	0
							ccRCC-19	13	36	0	87	0		ccRCC-63_snv_HC	0	24	0	49
							ccRCC-202	54	495	0	0	0		ccRCC-65_snv_HC	12	37	371	0
							ccRCC-203	3	93	0	0	0		ccRCC-66_snv_HC	5	52	0	0
							ccRCC-204	12	29	264	0	0		ccRCC-68_snv_HC	4	107	0	0
							ccRCC-205	2	84	0	0	0		ccRCC-70_snv_HC	0	0	37	106
							ccRCC-207	11	0	0	100	0		ccRCC-71_snv_HC	5	12	0	46
							ccRCC-208	8	16	0	67	0		ccRCC-74_snv_HC	5	59	0	0
							ccRCC-209	8	12	0	29	0		ccRCC-75_snv_HC	2	90	0	0
							ccRCC-20	8	18	0	114	0		ccRCC-79_snv_HC	6	52	0	0
							ccRCC-211	7	25	0	46	0		ccRCC-84_snv_HC	7	4	0	70
							ccRCC-213	3	61	0	0	0		ccRCC-85_snv_HC	3	8	0	34
							ccRCC-214	9	33	0	81	0		ccRCC-87_snv_HC	13	0	0	48
							ccRCC-216	5	36	0	84	0		ccRCC-88_snv_HC	9	82	0	0
							ccRCC-219	14	116	207	0	0		ccRCC-90_snv_HC	13	25	0	32
							ccRCC-21	11	0	94	120	0		ccRCC-92_snv_HC	0	0	31	87
							ccRCC-220	17	0	0	42	0		ccRCC-93_snv_HC	2	31	0	44
							ccRCC-225	5	122	0	0	0		ccRCC-9_snv_HC	7	81	0	0
							ccRCC-229	8	11	0	275	42
							ccRCC-230	0	0	0	0	1338
							ccRCC-28	3	59	0	0	0
							ccRCC-32	10	7	0	83	0
							ccRCC-36	19	24	0	59	0
							ccRCC-39	14	0	0	123	0
							ccRCC-46	6	3	0	69	0
							ccRCC-62	4	20	117	0	0
							ccRCC-69	14	11	39	96	0
							ccRCC-73	2	26	0	0	0
							ccRCC-77	10	0	0	68	0
							ccRCC-7	11	41	0	56	0
							ccRCC-80	11	9	0	74	0
							ccRCC-81	18	34	496	0	0
							ccRCC-86	7	0	0	63	0
							ccRCC-89	11	74	200	0	0
							ccRCC-91	0	23	15	45	0
							ccRCC-95	11	72	0	95	0
							ccRCC-97	4	0	0	50	0
							ccRCC-98	6	16	0	40	0

## Sheet: differential genetic events
	GP1 ( n = 51)	GP2 (n = 97)	GP3 (n = 76)	p value (Fisher's exact test)			GP1(n = 51)	GP2&3(n = 173)	p value (Fisher's exact test)
chr4q_loss	13	21	6	0.01195		BAP1 mut.	12	12	0.00179
non-chr4q_loss	38	76	70			BAP1 WT	39	161
chr8p_loss	19	18	16	0.03843		ABCA13 mut.	5	2	0.007476
non-chr8p_loss	32	79	60			ABCA13 WT	46	171
chr9p_loss	24	15	11	3.129e-05		MAST4 mut.	4	2	0.02526
non-chr9p_loss	27	82	65			MAST4 WT	47	171
chr9q_loss	25	18	12	5.42e-05
non-chr9q_loss	26	79	64				GP2(n = 97)	GP1&3 (n = 127)	p value (Fisher's exact test)
chr12q_gain	15	8	6	0.001108		NEB mut.	8	1	0.00595
non-chr12q_gain	36	89	70			NEB WT	89	126
chr14q_loss	30	45	24	0.008637		DDIAS mut.	8	1	0.00595
non-ch14q_loss	21	52	52			DDIAS WT	89	126
chr18q_loss	13	9	7	0.01825		AKAP9 mut.	6	0	0.006026
non-chr18q_loss	38	88	69			AKAP9 WT	91	127
chr20q_gain	16	11	7	0.002255		HERC1 mut.	7	1	0.01282
non-chr20q_gain	35	86	69			HERC1 WT	90	126
						NBPF9 mut.	8	2	0.01889
						NBPF9 WT	89	125
						CMYA5 mut.	6	1	0.02709
						CMYA5 WT	91	126
						ADGRV1 mut.	7	2	0.03686
						ADGRV1 WT	90	127
						CENPF mut.	7	2	0.03686
						CENPF WT	90	127
						PBRM1 mut.	30	25	0.03784
						PBRM1 WT	67	102
							GP3(n =76)	GP1&2(n = 148)	p value (Fisher's exact test)
						A2M mut.	5	2	0.04611
						A2M WT	71	146

## Sheet: GP1_proteins
GP1 up-regulated proteins									GP1 down-regulated proteins
Gene symbols	GP1	GP2&GP3	Fold change	p-value	None-zero in GP1	None-zero in GP2&GP3			Gene symbols	GP1	GP2&GP3	Fold change	p-value	None-zero in GP1	None-zero in GP2&GP3
AACS	0.164199	0.0486267	3.37672	0.0202068	41	114			AASS	0.0393431	0.400578	0.0982158	1.26e-08	28	154
AAK1	0.378268	0.176681	2.14097	0.0292252	53	169			ABAT	1.25232	4.28823	0.292038	0.000544779	49	167
AAMP	0.658216	0.318739	2.06506	0.0323314	47	138			ABCC6	0.00830782	0.0178892	0.464404	0.0476917	22	98
ABCC1	0.229135	0.113808	2.01334	3.81e-05	55	164			ABCC9	0.00400364	0.0205505	0.194819	3.89e-08	5	73
ACAP1	0.121223	0.014989	8.08745	9.31e-06	28	31			ABCD4	0.0218793	0.104731	0.20891	0.000386392	19	107
ACBD3	1.26216	0.565475	2.23204	5.2e-06	55	175			ABCG2	0.00141582	0.0120417	0.117576	2.33e-07	8	79
ACP2	0.606289	0.283265	2.14036	0.00903626	53	167			ABHD6	0.0833145	0.21637	0.385055	5.29e-05	35	152
ACSL4	1.18834	0.510853	2.3262	1.16e-06	55	172			ACAA2	13.3377	29.2192	0.45647	0.00407572	55	176
ADA	1.68949	0.502298	3.36353	0.000184069	55	169			ACAT1	11.7991	42.324	0.278779	0.000555283	55	177
ADAM15	0.0293602	0.013978	2.10045	0.0201209	14	86			ACE2	0.539397	2.72966	0.197605	1.26e-05	34	160
ADAMTSL4	0.197551	0.00891859	22.1504	1.13e-06	36	58			ACMSD	0.0397851	0.0854637	0.46552	0.0116208	17	89
ADRBK1	0.460431	0.215923	2.13238	0.0188466	53	167			ACOT2	0.214981	0.839567	0.256062	0.00067397	37	155
AGFG1	0.966602	0.419619	2.30352	0.0464252	54	174			ACOX2	0.0423604	0.195895	0.21624	0.00208419	23	110
AIF1	9.44499	4.03302	2.34191	6.65e-05	55	173			ACSM2A	2.37293	12.6108	0.188166	1.83e-06	32	160
AIM1	0.495067	0.182561	2.71179	6.32e-05	54	163			ACSM2B	3.32019	13.7377	0.241684	6.82e-06	35	162
AKAP13	0.0860769	0.033314	2.58381	0.0393449	52	160			ACSM5	0.0520611	0.110937	0.469284	0.0137036	19	97
ALG3	0.260241	0.0754288	3.45015	4.21e-07	52	137			ACTR5	0.00471636	0.0133045	0.354495	7.38e-05	15	98
ALOX5	4.12264	1.39218	2.96129	2.94e-06	55	173			ACY1	2.42042	12.0175	0.201408	0.018864	50	173
ALOX5AP	3.98392	0.900782	4.42274	0.00383397	48	135			ADAL	0.00751073	0.0172236	0.436071	0.000333313	6	59
ALYREF	1.88461	0.869063	2.16855	2.3e-07	55	168			ADCK1	0.0154353	0.091401	0.168874	0.0170915	11	59
AMPD3	0.596648	0.173836	3.43225	0.00350251	52	165			ADCY5	0.00134382	0.0040361	0.33295	4.8e-08	4	68
ANGPTL4	1.58598	0.21578	7.34999	9.52e-05	49	137			ADCY9	0.00140691	0.00403096	0.349026	0.00223116	7	59
ANKLE2	0.103646	0.0253696	4.08545	2.26e-05	41	85			ADH6	0.00884782	0.195769	0.0451953	7.05e-05	12	81
ANKRD22	0.223526	0.0284141	7.86675	8.83e-05	30	48			ADHFE1	0.0203371	0.0857513	0.237164	0.000188906	11	79
ANXA2	598.942	294.658	2.03267	2.37e-05	55	177			ADIPOQ	0.0860475	0.238757	0.360398	6.21e-07	24	146
APBB1IP	0.552558	0.235934	2.342	1.79e-05	54	158			AES	0.0351909	0.0737512	0.477157	9.09e-05	15	100
APMAP	8.50006	3.38807	2.50882	1.56e-11	55	177			AFAP1L1	0.00796764	0.0322592	0.246988	1.3e-09	13	119
APOBEC3C	1.53417	0.366187	4.18958	0.00101942	50	143			AFAP1L2	0.0330313	0.1732	0.190712	2.16e-05	33	152
APOE	26.2031	5.25837	4.98312	3.23e-05	55	177			AFMID	0.167277	0.695811	0.240406	0.000155867	22	121
APOL2	0.929416	0.333501	2.78685	0.00141528	49	144			AFTPH	0.0397525	0.136338	0.291573	0.0433684	36	132
ARGLU1	0.502587	0.201913	2.48912	0.0445132	29	66			AGMAT	1.96481	4.64149	0.423314	0.00905444	49	167
ARHGAP18	0.824322	0.302112	2.72853	4.26e-05	55	175			AGPAT9	0.0267245	0.0706633	0.378195	0.00153364	10	76
ARHGAP25	0.526857	0.200104	2.63291	0.000556589	54	168			AGXT2	0.114851	0.759978	0.151124	0.000216335	23	117
ARHGAP30	0.058282	0.0072448	8.04466	6.69e-05	34	64			AHSP	0.0748378	0.172629	0.433518	0.00343973	17	92
ARHGAP4	0.565622	0.166129	3.40471	0.00271474	53	171			AIF1L	0.33881	0.879769	0.385112	0.000344638	31	147
ARHGAP9	0.0613938	0.0154399	3.9763	0.000848397	29	50			AIFM2	0.176165	0.7066	0.249314	0.00156499	36	144
ARL6IP5	16.2214	6.3371	2.55975	3.78e-07	55	176			AK9	0.00948436	0.0370945	0.255681	0.000550367	11	75
ARPC1B	4.27818	2.06435	2.07241	2.9e-09	55	177			AKR1C1	0.813106	3.1917	0.254756	7.62e-08	21	143
ARPP19	1.29454	0.240102	5.39161	0.0253245	41	114			AKR7A3	2.8489	5.73341	0.496894	0.00193578	46	170
ARRB2	0.282983	0.0766092	3.69385	3.04e-05	49	124			AKT3	0.0353005	0.0918056	0.384514	1.45e-05	22	128
ASNS	0.290715	0.14431	2.01451	0.0396987	44	126			AKTIP	0.110373	0.260955	0.422958	0.000178062	23	122
ATG12	0.197683	0.0661879	2.98669	0.00036075	40	91			ALDH1A1	87.6767	237.355	0.369391	5.54e-07	55	177
ATG4C	0.0251264	0.00742582	3.38365	0.0323538	30	70			ALDH1L1	1.45045	4.6215	0.313849	1.27e-07	36	169
ATP2A3	0.76488	0.313103	2.4429	0.00191942	54	169			ALDH6A1	5.92561	25.7674	0.229965	0.00027753	55	176
ATXN2L	0.538389	0.239955	2.24371	0.0015211	54	165			ALDH7A1	9.23079	22.857	0.403849	8.15e-06	55	177
AVL9	0.302485	0.084028	3.59981	0.00151614	38	92			ALDH8A1	0.42593	0.987364	0.431381	9.81e-05	28	142
B4GALT1	0.339611	0.120272	2.8237	0.000441264	52	156			ALDOB	4.51803	45.3885	0.0995412	0.000213639	43	168
B4GALT7	0.0658375	0.0101833	6.46525	1.49e-08	39	53			ALPL	0.151684	1.12887	0.134368	4.25e-08	31	154
BASP1	1.29833	0.217786	5.96149	0.0209878	47	143			AMDHD1	0.0376395	0.182905	0.205787	7.7e-06	18	113
BCAT1	0.271216	0.0906805	2.9909	0.00327301	45	122			AMFR	0.00370291	0.015112	0.24503	0.0154442	9	54
BCS1L	8.01744	2.61207	3.06938	0.00132135	55	170			AMN	0.308395	1.39638	0.220853	2.77e-08	25	150
BET1	2.99462	0.660465	4.5341	0.00383297	52	167			ANK3	0.397344	1.10093	0.360917	7.49e-05	44	168
BIN2	0.230974	0.0578556	3.99226	0.00889686	46	133			ANKRD49	0.0169591	0.0796506	0.212919	0.00427777	10	61
BNIP2	0.0542535	0.0124306	4.36452	0.00484321	31	66			ANO1	0.00944	0.0640023	0.147495	5.34e-05	15	97
BPNT1	5.72247	1.83819	3.1131	0.0202651	54	175			ANTXR1	0.0198729	0.0617379	0.321892	0.0331096	14	77
BTF3L4	1.39997	0.581313	2.40829	1.65e-06	45	90			AOC3	1.24287	3.36525	0.369324	0.0399918	53	172
C1GALT1	0.0618518	0.0158364	3.90566	0.0280363	30	72			APBB1	0.00174182	0.0230408	0.075597	2.52e-09	5	74
C1orf122	1.34523	0.565984	2.3768	0.0196857	28	62			ARHGAP24	0.0116427	0.0517107	0.225151	1.91e-10	20	148
C1QA	0.570121	0.132624	4.29877	3.78e-05	50	141			ARHGAP31	0.00273964	0.013676	0.200324	9.77e-06	7	71
C1QB	11.4469	3.10401	3.68776	1.21e-05	55	176			ARHGEF15	0.00716164	0.0293024	0.244405	1.47e-13	6	95
C1QC	3.42782	0.831672	4.1216	1.8e-09	55	175			ARHGEF28	0.00482164	0.020525	0.234915	4.24e-05	16	104
C1R	1.09939	0.54664	2.01118	0.00686099	54	174			ARHGEF37	0.0252595	0.143743	0.175727	5e-11	18	141
C1S	1.92572	0.69841	2.75729	4.76e-08	55	177			ARHGEF40	0.0117018	0.0428682	0.272972	4.76e-05	25	130
C20orf27	0.517036	0.185405	2.78869	0.00676394	48	134			ARL15	0.135855	0.526093	0.258234	3.69e-05	43	169
C3orf58	0.292904	0.130191	2.24981	0.000840202	45	115			ARL6IP4	0.25156	0.695674	0.361606	0.00401547	27	125
C4BPA	8.03973	3.13546	2.56413	1.15e-06	55	177			ARVCF	0.0341073	0.0862256	0.395559	5.85e-08	25	154
C4BPB	0.262508	0.120764	2.17373	0.000110826	40	85			ASAP2	0.0280516	0.136221	0.205928	2.08e-09	21	143
C5	2.95214	0.833982	3.53981	2.06e-06	55	177			ASPA	0.727897	1.61757	0.449995	0.000552912	43	167
C5AR1	0.115194	0.0198104	5.81483	0.000245058	28	43			ASPDH	0.091412	0.791629	0.115473	0.000188737	9	73
C5orf15	0.199502	0.0467272	4.26951	0.000178857	32	56			ASPG	0.097516	0.269657	0.36163	5.9e-07	7	83
C7	3.46959	0.942187	3.68248	0.000365278	55	175			ASRGL1	0.697867	2.44686	0.285209	5.21e-06	35	163
C8B	2.08489	0.50494	4.12899	3.56e-06	55	173			ASS1	1.85323	8.76997	0.211316	0.0413044	53	177
C8G	5.55067	1.82634	3.03923	0.00014291	55	175			ATG2B	0.000484	0.00475554	0.101776	5.1e-14	3	84
C9	22.2578	6.21569	3.5809	4.82e-05	55	176			ATL2	0.560521	1.60485	0.349268	0.026488	37	143
CALR	64.1331	26.8949	2.38458	2.12e-06	55	176			ATP5S	0.0483602	0.102121	0.473559	0.00496373	24	121
CALU	13.6084	4.77871	2.84772	5.41e-11	55	176			ATP6	1.88631	5.09438	0.370274	0.000839649	39	162
CANT1	0.0855751	0.0318379	2.68784	0.000148595	32	56			ATP9B	0.00286618	0.00600152	0.477576	0.0424884	11	60
CAPN6	0.0512642	0.0172655	2.96917	0.0071068	42	108			ATPIF1	1.57058	3.16177	0.49674	0.020988	33	136
CARD11	0.0143596	0.00435435	3.29777	0.00157998	27	45			ATXN3	0.0519222	0.115382	0.450004	0.0017995	33	143
CARD9	0.0783829	0.0330228	2.3736	7.21e-05	39	74			AUH	0.429439	1.59721	0.268868	4.67e-06	38	164
CASP1	1.74589	0.834711	2.09161	3.3e-07	55	174			BAG5	0.214308	0.45287	0.473221	0.000180303	43	173
CASP3	0.453056	0.216914	2.08864	0.00228881	48	134			BBOX1	2.62373	7.14178	0.367378	4.22e-05	42	165
CASP4	0.137085	0.0253674	5.40399	5.27e-06	37	64			BBS1	0.00824218	0.0382292	0.215599	6.31e-06	13	100
CBFB	0.708889	0.176405	4.01854	2.88e-07	53	154			BBS2	0.00497145	0.0149616	0.33228	7.31e-06	12	96
CCDC43	0.262535	0.0890046	2.94968	0.00632803	34	76			BDH2	3.03819	9.21216	0.329803	2.21e-05	54	177
CCDC88B	0.102891	0.0212244	4.84775	0.000112346	37	75			BHMT	23.2576	68.6888	0.338594	0.0023203	53	175
CCDC90B	5.72335	0.673849	8.49351	0.00083164	51	155			BHMT2	2.12356	7.64546	0.277754	0.000292537	43	168
CCNL1	0.0141813	0.00631395	2.24602	0.000140682	28	40			BIN3	0.018922	0.0939376	0.201432	2.66e-11	14	132
CD151	1.02471	0.477772	2.14477	9.55e-11	55	154			BPHL	1.03995	2.50585	0.415009	0.0376613	50	169
CD163	1.40921	0.553526	2.54587	0.00108357	54	175			BTNL9	0.00168946	0.133267	0.0126772	1.14e-09	3	61
CD2BP2	0.721911	0.23135	3.12042	2.91e-05	52	145			C12orf57	0.484012	1.38675	0.349026	0.000720721	30	137
CD300A	0.0747509	0.0328857	2.27306	0.0026014	25	41			C14orf169	0.011748	0.0422685	0.277937	0.0291964	21	94
CD38	1.08194	0.258112	4.19174	0.00756273	44	120			C14orf2	1.53449	3.4295	0.447438	0.00169216	37	157
CD40	0.176047	0.0545905	3.22487	0.0357841	36	96			C19orf77	0.028474	0.148352	0.191935	0.00150403	8	62
CD44	8.15329	1.64765	4.94842	3.72e-08	55	177			C7orf10	0.0184345	0.23653	0.0779373	7.09e-13	15	140
CD47	2.41021	1.13652	2.12069	2.95e-11	55	155			C7orf41	0.00439291	0.0533472	0.0823457	2.18e-10	4	72
CD63	3.61252	1.08222	3.33806	6.21e-06	53	159			CA1	49.4219	104.35	0.473614	1.98e-07	55	177
CDA	1.66346	0.118704	14.0135	0.00399803	30	67			CA4	0.105615	0.268943	0.392704	0.00288999	22	107
CDC123	0.0857307	0.0175664	4.88037	0.00503835	26	51			CAMSAP1	0.00310491	0.00735395	0.422209	0.0248382	8	52
CDC27	0.0350664	0.0104618	3.35185	0.0040326	30	63			CAMSAP2	0.00253436	0.0103976	0.243744	1.79e-06	6	69
CDCP1	0.112521	0.0282752	3.97948	1.28e-10	42	56			CAPN5	0.0366747	0.115966	0.316254	9.52e-08	24	149
CDKN2AIPNL	0.135843	0.0176719	7.68691	1.61e-05	31	44			CASKIN2	0.0147313	0.0486269	0.302945	7.11e-12	13	131
CDV3	0.819196	0.314653	2.60349	0.00261312	49	141			CBR4	1.24199	2.91782	0.425655	0.00149526	44	165
CFHR5	0.4702	0.0979375	4.80102	5.72e-05	37	73			CCBL1	0.041436	0.114935	0.360518	3.34e-06	27	145
CHERP	0.404838	0.157773	2.56596	0.00010661	54	163			CCDC104	0.0115816	0.0255994	0.452418	0.0363058	16	77
CHMP4B	1.01655	0.415917	2.44412	0.00105193	53	161			CCDC28A	0.0194924	0.0412997	0.471974	0.000201575	17	103
CHST14	0.132874	0.0524882	2.5315	0.0229629	49	155			CD34	0.228657	1.07754	0.212202	6.78e-08	33	168
CLASP1	0.264138	0.118655	2.2261	0.00260148	55	169			CD36	0.435324	2.81588	0.154596	2.13e-05	45	168
CLEC11A	0.394404	0.131281	3.00428	0.0090543	43	120			CDC42BPG	0.00165273	0.0104106	0.158755	5.47e-06	5	60
CLIC1	65.6872	31.785	2.06661	2.01e-05	55	177			CDH1	0.196942	0.436628	0.451053	0.00286945	42	164
CLU	164.611	25.7797	6.38527	2.03e-06	55	177			CDH16	0.364319	1.13032	0.322315	0.0215614	43	161
CNNM3	1.24724	0.276437	4.51183	0.0187929	41	158			CDS1	0.0340189	0.0795586	0.427596	4.28e-05	11	90
COPS7B	1.21153	0.438138	2.76518	6.98e-05	51	141			CELF4	0.0211933	0.0682873	0.310355	0.0162543	12	72
CORO1A	9.4786	2.48416	3.81561	1.8e-05	55	177			CENPV	0.0636369	0.398119	0.159844	4.39e-10	22	152
COX19	0.432085	0.0744999	5.79981	0.000250138	35	68			CEP135	0.00453727	0.0249741	0.181679	0.000121713	10	75
COX20	3.19709	1.56718	2.04003	2.36e-07	55	167			CEP97	0.00223164	0.00638644	0.349434	0.0070555	11	67
CPB2	1.93974	0.438093	4.42768	0.00114735	54	164			CHDH	0.839837	2.81922	0.297897	0.00212175	50	168
CPOX	1.12357	0.438946	2.55969	1.5e-11	55	174			CKB	2.4053	12.5448	0.191736	0.0108327	52	175
CPSF7	0.706877	0.268634	2.63137	0.000172881	54	164			CLDN5	0.0305849	0.0965015	0.316937	5.59e-05	18	111
CRP	2.49521	0.718572	3.47246	1.16e-05	34	56			CLEC14A	0.271488	0.972299	0.279223	1.44e-05	32	152
CRTAP	0.209382	0.0809124	2.58777	4.63e-05	42	87			CLMN	0.0864218	0.980909	0.0881038	0.000197926	45	161
CSK	1.37838	0.668787	2.06101	0.00012945	55	175			CLN6	0.100725	0.385746	0.261117	0.000113983	29	140
CTHRC1	0.802051	0.274559	2.92123	0.0127818	45	134			CMA1	0.0522118	0.583081	0.0895446	2.71e-08	10	95
CTSG	8.63562	1.71172	5.04501	0.00236131	52	151			CNKSR3	0.00849782	0.0227473	0.373575	1.18e-06	7	80
CTSZ	5.46687	1.79171	3.05121	3.02e-08	55	175			COA4	0.0714333	0.247659	0.288434	0.0031068	22	107
CXorf38	0.274412	0.127985	2.1441	0.0482801	47	135			COBLL1	0.0274864	0.0870392	0.315793	0.000109779	30	143
CYBB	5.36498	0.931444	5.75986	1.7e-05	55	175			COL4A1	1.09672	2.67401	0.410142	8.53e-05	55	177
CYLD	0.0522016	0.0131502	3.96964	0.0263652	26	58			COX1	0.104667	0.366393	0.285667	0.000557886	29	137
DAD1	23.1947	10.1318	2.28929	1.57e-07	55	176			COX4I2	0.00443836	0.0350045	0.126794	5.1e-09	4	68
DCK	0.385547	0.117651	3.27705	0.00450955	45	121			COX6C	0.898832	3.01619	0.298002	0.000515803	31	145
DEF6	0.243169	0.0460432	5.28132	4.43e-07	46	103			COX7A2	14.1354	29.0434	0.4867	0.0376704	55	176
DEGS1	1.00844	0.332662	3.03142	3.94e-05	54	168			COX8A	0.352905	4.05873	0.0869496	0.00868204	19	96
DERL2	3.69846	0.740685	4.99329	0.00328615	45	124			CPA3	0.0835047	0.336347	0.248269	6.25e-06	19	119
DFNA5	0.886267	0.281742	3.14566	7.52e-06	54	165			CPQ	0.247224	0.648924	0.380976	0.0317079	51	173
DHCR24	0.346638	0.0485207	7.14412	0.00193082	27	50			CRIP1	3.25942	7.83989	0.415749	0.000372749	39	161
DIABLO	2.43542	0.889216	2.73884	3.75e-09	55	172			CRMP1	0.315429	0.708426	0.445253	0.000529481	16	95
DLGAP4	0.394764	0.171316	2.3043	0.000748738	52	155			CRYL1	11.1108	29.4752	0.376955	0.000323124	54	177
DNAJB9	0.319866	0.0879339	3.63757	0.00717211	22	37			CRYM	0.890501	1.82248	0.48862	9.72e-05	37	162
DNAJC5	1.5403	0.424459	3.62884	1.66e-05	49	133			CTIF	0.0164475	0.0343582	0.478705	0.0105008	14	77
DNM3	0.583546	0.200524	2.9101	0.00267235	14	97			CTNNA2	0.182965	0.390751	0.46824	0.0128529	15	79
DNMT1	0.0373951	0.0138446	2.70105	0.034925	42	127			CYGB	0.824115	2.55279	0.322829	0.0011359	40	157
DOCK10	0.0421238	0.0151958	2.77207	0.015184	44	131			CYP4X1	0.00207964	0.0374341	0.0555546	5.07e-14	7	104
DOCK2	0.585575	0.274151	2.13596	0.0106851	54	172			CYSTM1	0.216208	0.477975	0.452342	0.000225868	19	114
DOK3	0.167303	0.0214299	7.807	3.1e-08	38	48			DAAM2	0.00154309	0.0476112	0.0324103	1.01e-15	8	109
DPYD	0.262364	0.0839102	3.12673	0.00182114	51	157			DAB2IP	0.0114084	0.0360411	0.316538	1.25e-06	29	150
DRG1	1.80734	0.664287	2.72073	3.95e-06	55	168			DCAF5	0.00129382	0.00431881	0.299577	0.00012376	9	74
DTX3L	0.251026	0.109733	2.28761	0.0160074	51	157			DDC	0.795706	2.99483	0.265694	2.08e-06	32	160
DUSP12	0.0861231	0.0186695	4.61302	0.000961092	38	86			DDHD2	0.0209538	0.0702353	0.298337	4.22e-05	29	142
DYNLL1	1.3985	0.565887	2.47134	1.3e-05	53	150			DDO	0.0238151	0.109738	0.217019	0.000308697	12	83
ECM1	2.40719	0.798446	3.01485	0.00165176	54	175			DDX31	0.0166427	0.054431	0.305758	0.000274897	20	108
EDC4	0.61978	0.270274	2.29315	2.8e-05	55	175			DDX54	0.260463	0.67119	0.388062	0.0019734	36	152
EDEM3	0.0809582	0.0277825	2.91399	0.000225756	35	66			DHRS11	0.10262	0.260725	0.393593	0.00161754	27	129
EFEMP1	9.97622	3.4922	2.85671	0.0308321	53	173			DHRS3	0.439106	1.2616	0.348055	0.0062099	40	152
EFEMP2	0.679686	0.287488	2.36422	0.000470161	51	149			DHX30	0.0872107	0.177747	0.490644	0.0453082	46	159
EFHD2	5.89325	2.49365	2.3633	5.1e-08	55	176			DHX40	0.00280582	0.00710689	0.394802	0.000663911	13	85
EGFR	1.32461	0.616757	2.14771	0.000621553	55	172			DIP2A	0.00989964	0.0439771	0.225109	1.42e-10	17	142
EHBP1L1	0.159406	0.0324111	4.91825	0.00798013	51	160			DIP2C	0.0129731	0.0446136	0.290788	3.72e-05	23	126
EIF2S2	1.87531	0.907986	2.06535	1.43e-07	55	176			DMGDH	1.12176	2.78098	0.403369	0.00564361	49	166
EIF3H	2.83311	1.21193	2.33769	0.000759292	55	176			DNMBP	0.0172945	0.0471695	0.366647	0.00323045	15	87
EIF4E3	1.53832	0.18397	8.36179	0.010366	22	117			DNPH1	6.23263	12.4665	0.49995	0.0121913	54	176
ELOVL5	0.548379	0.232117	2.36252	0.0094398	49	141			DOCK6	0.0851813	0.304051	0.280155	0.00012964	48	169
EMC2	0.594331	0.290649	2.04484	0.00722168	53	163			DPYS	0.971361	2.55189	0.380643	0.00420715	42	163
EMILIN2	0.751989	0.292217	2.57339	0.00016828	54	168			DTNA	0.0183084	0.0651541	0.281001	0.00534189	9	59
EMP3	0.536566	0.198177	2.70751	2.71e-07	44	78			DTNB	0.0320804	0.113224	0.283336	3.76e-05	33	149
EMR2	0.0411471	0.00912927	4.50716	0.000105053	36	69			DYNC2H1	0.01599	0.0364623	0.438536	5.19e-05	30	145
EPS8L3	0.15836	0.0240903	6.5736	0.00446869	24	48			DYNC2LI1	0.00249454	0.0151601	0.164547	3.22e-05	5	53
ERGIC2	0.0720393	0.0322331	2.23495	0.00208044	39	91			ECHDC2	0.387743	1.07758	0.359826	3.06e-06	31	158
ERGIC3	0.643458	0.0848072	7.5873	0.0176461	46	139			ECHDC3	1.92613	4.33187	0.444641	0.0103198	51	169
ERO1L	6.43387	2.3677	2.71735	4.63e-08	55	176			ECSCR	0.0136478	0.041256	0.330808	0.00180692	12	75
ESYT2	2.01676	0.973835	2.07095	4.26e-05	55	175			EDNRA	0.00488836	0.0115231	0.424223	0.00989515	9	58
EVI2B	0.0863731	0.0319314	2.70496	0.0256121	33	82			EFCAB7	0.00217618	0.00749554	0.29033	0.000688688	6	56
EVL	1.23412	0.560786	2.2007	0.000388625	54	166			EFNB2	0.00101454	0.0217118	0.0467279	4.09e-09	5	69
EXOC5	0.825431	0.367239	2.24766	0.0203152	55	168			EHHADH	3.26533	6.98793	0.467281	0.0117576	55	176
F13A1	16.2647	7.25532	2.24176	0.000211943	55	177			EIF3F	14.3959	31.1873	0.461594	0.0456066	55	176
F2	13.8619	6.85895	2.02099	0.000504663	55	177			ELTD1	0.00664946	0.0247441	0.268729	1.81e-05	13	96
FABP7	137.408	51.6156	2.66215	0.000132714	43	98			ENDOG	0.0564785	0.115112	0.490639	0.00786548	23	109
FAM105A	0.276015	0.135997	2.02956	2e-05	52	144			EPB41L1	0.326359	0.770883	0.423357	0.0131156	52	170
FAM49A	0.730514	0.262725	2.78053	0.0120804	37	92			EPB41L4A	0.00105127	0.00998785	0.105255	2.8e-14	3	82
FAM63A	0.0904042	0.0263129	3.43574	0.00175544	32	69			EPB41L5	0.0107109	0.060782	0.176218	6.16e-08	15	115
FBN1	8.57768	3.92436	2.18575	0.00132152	55	177			EPHX2	1.30621	3.39917	0.384273	0.00193121	52	172
FCGR1A	1.07964	0.27349	3.94764	5.59e-07	52	144			EPM2AIP1	0.0660356	0.332438	0.19864	0.000106144	39	154
FCGR2B	0.217303	0.0283578	7.66292	0.000126354	26	34			ERG	0.00940018	0.0394734	0.238139	7.26e-07	14	107
FCHSD1	0.0277678	0.0127942	2.17034	0.00824875	32	69			EXOC3L2	0.21158	0.707025	0.299254	1.17e-06	37	162
FERMT3	4.18416	1.95114	2.14448	0.000640804	55	176			EXOC3L4	0.0437676	0.0978177	0.447441	3.81e-05	13	93
FGA	827.621	145.688	5.68077	6.89e-09	55	177			EXOC6B	0.124287	0.274827	0.452238	0.00212877	46	169
FGB	2956.64	488.557	6.05177	2.29e-08	55	177			EXOG	0.0305269	0.064225	0.475312	0.0347979	17	85
FGG	1235.66	174.181	7.09409	3.35e-11	55	177			FAAH	0.147063	0.488603	0.300988	0.000125704	36	152
FHL2	0.558372	0.204058	2.73634	0.00865707	49	145			FABP4	0.168392	0.808553	0.208263	1.58e-06	11	94
FKBP10	5.15759	2.1053	2.44982	3.55e-07	55	174			FAHD1	5.18553	12.4215	0.417464	0.022158	55	175
FKBP11	1.34485	0.22891	5.87503	1.89e-08	53	147			FAM160A2	0.0192955	0.0497271	0.388027	0.00121815	30	138
FMNL1	0.368551	0.0821137	4.4883	3.07e-12	55	165			FAM185A	0.0161267	0.0425994	0.378567	0.0173977	18	88
FNBP1	2.05775	0.600199	3.42845	0.022134	50	146			FAM198B	0.00482164	0.0151868	0.317488	4.27e-06	16	110
FNDC3B	0.274728	0.132526	2.07301	0.000284053	53	157			FAM210A	0.0308435	0.0808894	0.381304	0.00109593	26	125
FSTL1	0.252127	0.048415	5.20763	1.71e-09	45	82			FAM98C	0.0442005	0.109835	0.402427	3.66e-06	32	158
FTSJ3	0.335427	0.142539	2.35323	0.000293006	55	165			FARP1	0.489184	0.986039	0.49611	0.0057023	54	175
FUT8	0.0539302	0.014172	3.80539	0.0051226	29	62			FARP2	0.004268	0.051041	0.083619	0.0116247	11	61
FYB	0.264515	0.0431552	6.12939	3.45e-05	42	100			FBP1	4.42344	14.4688	0.305722	0.00742197	54	175
G3BP2	0.353275	0.137838	2.56298	3.19e-08	53	138			FBXO21	0.0747276	0.178137	0.419495	4.3e-05	23	129
G6PD	6.79312	3.09843	2.19244	0.000239574	55	177			FBXO38	0.00253273	0.0136629	0.185372	6.31e-08	15	113
GAL3ST1	0.790397	0.22326	3.54025	0.0194335	43	126			FER	0.0163455	0.104036	0.157113	0.00022626	15	99
GALNT1	0.188953	0.0573239	3.29624	1.76e-06	52	144			FERMT2	1.06613	2.14854	0.49621	0.00462684	55	176
GALNT2	1.90281	0.507507	3.74933	1.42e-10	55	175			FLRT3	0.0419064	0.103418	0.405214	1.8e-07	10	100
GALNT7	0.0826698	0.0343698	2.4053	9.28e-08	41	71			FLYWCH2	0.0195816	0.0391876	0.499689	0.0473064	16	76
GBP5	0.879445	0.248191	3.54342	0.0212508	40	112			FMO1	0.906488	2.6472	0.342433	0.0010478	43	161
GCA	13.3203	3.29911	4.03754	0.000145752	55	177			FRAS1	0.00526309	0.0401042	0.131235	0.00258778	8	53
GDAP2	0.082886	0.0167843	4.93829	0.0454098	32	84			FTCD	0.428365	3.33499	0.128445	2.66e-09	19	139
GLA	0.333933	0.136971	2.43798	5.72e-05	54	158			FUOM	0.0534585	0.147952	0.361323	0.00377942	13	75
GMIP	0.168883	0.0321605	5.25125	1.14e-05	41	87			G6PC3	0.0364255	0.190746	0.190963	0.00407547	15	79
GNA13	3.91014	1.60467	2.43672	2.64e-07	55	176			GAB1	0.003432	0.0446046	0.0769427	8.95e-06	9	75
GNPTG	0.438253	0.102339	4.28237	2.17e-05	36	62			GALNT11	0.0985216	0.233055	0.422739	0.000191016	26	138
GOLGA3	0.483793	0.218004	2.2192	0.000303524	55	172			GAMT	1.49315	4.28587	0.348388	0.00741782	49	167
GOLIM4	0.17805	0.0809003	2.20085	0.00697252	52	162			GAS2L1	0.0146815	0.0336941	0.435727	0.00241381	17	91
GOLPH3L	0.414042	0.164362	2.51908	8.32e-06	46	104			GATM	12.5077	52.9563	0.236189	0.00243105	55	176
GOLT1B	2.20646	0.478078	4.61528	2.59e-07	53	150			GBA3	0.0488102	0.296302	0.164731	3.01e-05	19	107
GORASP1	0.179191	0.0660153	2.71438	8.49e-06	15	126			GDPD1	0.00607509	0.0468231	0.129746	0.00103381	12	79
GPX8	0.437072	0.213596	2.04626	6.01e-05	50	130			GFOD2	0.007276	0.0400461	0.181691	1.41e-08	7	81
GTPBP4	0.577927	0.195454	2.95685	0.00607543	54	162			GIPC3	0.0182871	0.0850154	0.215103	5.67e-11	16	135
GUSB	0.209502	0.0604133	3.46781	9.73e-13	54	141			GLB1L2	0.00485345	0.0165799	0.29273	0.0160818	11	62
HCK	0.777782	0.183978	4.22758	1.15e-05	53	157			GLCE	0.0107311	0.0588317	0.182403	0.0138817	14	76
HCLS1	1.43599	0.612791	2.34337	0.00375403	54	170			GLO1	9.9464	20.0125	0.49701	4.12e-06	55	177
HDLBP	4.00003	1.70628	2.34429	7.25e-05	55	176			GLYAT	1.14899	3.94557	0.291211	0.00274238	41	159
HIST1H1D	66.2694	14.9341	4.43745	1.99e-06	55	170			GLYATL1	0.367995	1.54099	0.238804	0.0030072	43	160
HIST2H2AB	31.6321	4.42213	7.15314	0.0420507	24	57			GMPR	0.0133773	0.209049	0.0639912	4.8e-09	10	95
HK2	1.87918	0.914481	2.05491	1.89e-09	55	160			GMPR2	0.65981	6.45263	0.102254	4.71e-05	50	175
HK3	2.53196	1.12012	2.26045	0.00912608	48	140			GOLGA1	0.0715176	0.506341	0.141244	0.00503229	28	113
HM13	25.4091	6.16457	4.12179	5.96e-10	55	176			GPHN	0.236204	0.996772	0.236969	8.25e-05	41	163
HMGA1	1.30583	0.328197	3.9788	0.00110644	42	106			GPR116	0.028812	0.112725	0.255594	0.000776946	39	156
HMGB2	5.37934	1.62117	3.31819	0.000921298	51	146			GPT	0.404165	1.30284	0.310219	2.24e-05	27	140
HMHA1	0.21587	0.0909123	2.37449	0.000549434	48	130			GRB10	0.0342089	0.121112	0.282458	1.79e-05	26	140
HN1	0.412961	0.0622319	6.63584	2.66e-05	40	82			GRHPR	3.89573	9.42763	0.413224	7.54e-05	55	177
HP	144.946	66.5227	2.17889	8.84e-06	55	173			GSTA1	27.0412	60.773	0.444953	2.4e-06	18	121
HSCB	0.0592096	0.0275653	2.14798	0.0220316	22	41			GSTA3	24.6054	49.3979	0.498106	2.06e-07	14	115
HSP90B1	127.573	47.5631	2.68219	9.83e-10	55	177			GSTM3	2.10112	5.45808	0.384956	0.000543987	54	177
HSPB11	1.32651	0.311802	4.25431	0.00330975	45	123			GSTT1	1.75279	3.61001	0.485535	0.0436081	22	94
HTRA1	1.78439	0.226571	7.87564	3.77e-11	53	135			GSTZ1	0.380891	0.860677	0.442548	0.0399084	44	160
HVCN1	0.429829	0.0521573	8.241	4.02e-05	37	72			GTF2A2	0.0163902	0.0473134	0.346417	0.000312491	9	70
ICAM3	0.569223	0.122492	4.64703	0.00236458	47	133			GUCY1A2	0.00390327	0.0248001	0.157389	7.91e-09	7	85
IER3IP1	3.41203	1.60182	2.13009	1.47e-05	55	171			GUF1	0.00716418	0.0409576	0.174917	6.32e-05	12	88
IFI16	2.48697	1.1761	2.1146	4.8e-06	55	176			HACE1	0.0121369	0.0306093	0.396511	8.59e-05	22	123
IFT27	1.16487	0.495263	2.35202	1.12e-05	55	168			HAO2	0.27677	0.577627	0.47915	1.22e-07	9	97
IGFBP3	8.03894	2.05209	3.91745	1.64e-05	54	168			HBZ	10.9495	35.3215	0.309995	0.00431355	12	74
IGJ	8.27496	1.45961	5.6693	7.02e-05	54	175			HDAC5	0.000454727	0.00429277	0.105929	1.83e-06	4	55
IGLL5	196.526	84.8476	2.31622	4.88e-06	55	177			HHAT	0.00981964	0.0339263	0.28944	0.00507717	7	52
IGSF8	0.419352	0.204456	2.05107	0.0425283	28	130			HMBS	0.0489653	0.131904	0.37122	0.000163414	26	135
IL18	0.477921	0.109225	4.37555	2.24e-05	49	130			HMGCS2	0.194108	0.613268	0.316513	0.000163009	13	86
IL4I1	0.875555	0.165432	5.29254	2.14e-18	55	144			HMGN5	0.0111844	0.0414241	0.269997	0.016362	11	61
IL5RA	0.288135	0.00894932	32.1963	4.26e-08	33	34			HP1BP3	2.03817	4.26292	0.478115	4.95e-05	55	176
ILKAP	0.383002	0.120801	3.17052	0.00188364	52	156			HSD11B2	0.139025	1.0395	0.133741	2.3e-06	30	149
IMPDH1	0.318072	0.0867406	3.66693	0.041943	49	158			HSDL2	1.24548	3.65849	0.340435	0.00570283	55	174
INHBC	0.0857205	0.02796	3.06583	0.0407715	22	45			HSPA12B	0.172068	0.870916	0.197571	8.59e-09	31	163
INPP5D	0.175053	0.0712807	2.45583	0.0110998	53	169			HSPB2	0.029812	0.113789	0.261993	0.0445838	9	49
INTS10	0.0674802	0.0306979	2.19821	0.025887	44	125			IDNK	0.108841	0.238347	0.456648	0.0168386	32	130
IPO11	0.0724145	0.0308418	2.34793	0.00260896	45	117			IGF1R	0.0573871	0.149848	0.382969	1.16e-06	26	147
IRAK4	0.584488	0.0258341	22.6247	0.000535168	42	104			IL6ST	0.00808582	0.0224332	0.360439	1.15e-07	13	119
IRF5	0.0640202	0.0220838	2.89897	0.0201497	34	84			IMPA2	1.02501	2.57725	0.397712	0.00239913	50	169
ISG20	0.672549	0.147819	4.5498	1.66e-05	47	114			INPP4B	0.0323753	0.0702519	0.460846	1.19e-06	21	139
ITGAM	1.96304	0.343989	5.7067	5.68e-07	55	175			INPP5A	0.0164551	0.0438891	0.374924	5.01e-06	22	130
ITGAX	0.322082	0.158259	2.03516	0.00144306	53	162			INPP5F	0.00114327	0.00451684	0.253114	0.000831044	7	59
ITGB2	4.87034	0.961183	5.06703	6.2e-10	55	174			IQSEC1	0.0324833	0.0722533	0.449575	6.57e-08	17	133
KIAA1191	0.769334	0.275658	2.7909	2.64e-05	47	107			IRF6	0.00559546	0.0404693	0.138264	0.00128267	10	70
KIAA1244	0.0533151	0.0250155	2.13128	0.0158039	32	73			ITGA7	0.0442218	0.241346	0.18323	2.66e-07	35	159
KIF21B	0.153151	0.0281935	5.43215	0.00049716	33	62			ITGA8	0.00378291	0.0231885	0.163137	3.15e-05	9	71
KIF2A	1.04062	0.160561	6.48118	7.02e-19	55	165			ITIH1	15.5533	40.4488	0.384519	0.000291233	55	177
KIN	0.139831	0.0138173	10.12	0.00172581	34	80			JAM2	0.013292	0.0337202	0.394185	1.23e-05	9	80
KMO	1.46494	0.715941	2.04617	6.72e-05	47	118			KANK3	0.0200796	0.075176	0.267102	5.88e-11	17	142
KRT14	1.54647	0.366898	4.21498	0.000284891	34	65			KCNJ15	0.00688927	0.0297825	0.231319	1.24e-06	4	56
KRT19	27.9741	8.55198	3.27107	1.7e-05	51	144			KCP	0.003134	0.036874	0.0849922	0.00072709	8	58
KRT2	1.69868	0.530563	3.20166	2.16e-07	55	176			KDR	0.00760109	0.0603057	0.126043	7.38e-05	9	77
KRT5	1.03074	0.247067	4.17191	7.08e-07	42	74			KIAA0195	0.0356024	0.147433	0.241482	3.84e-05	32	142
KRT9	3.73269	0.672993	5.5464	0.000915436	53	172			KIAA1456	0.00771364	0.0282746	0.272812	2.02e-07	10	97
LACTB	1.25658	0.615179	2.04263	9.75e-08	55	174			KIAA1704	0.0207082	0.0436653	0.474249	2.43e-05	20	122
LBP	3.55487	1.16213	3.05893	0.000193669	55	176			KIF12	0.00228018	0.0219282	0.103984	2.12e-11	4	78
LBR	0.924966	0.254032	3.64114	5.29e-09	54	154			KIF13A	0.00891491	0.0239734	0.371866	0.000152076	13	87
LCK	0.106724	0.0500465	2.13249	0.0281959	34	84			KIFC3	0.00335	0.0140783	0.237955	0.0214438	10	61
LCP1	28.4816	9.44878	3.01432	1.64e-09	55	177			KLHDC7A	0.014842	0.0796759	0.18628	0.00117938	14	84
LCP2	0.259655	0.110538	2.349	2.93e-07	53	146			KLHL22	0.00823164	0.0305066	0.269831	0.000146097	21	120
LEPRE1	0.321121	0.120003	2.67593	0.0162699	52	169			KMT2A	0.00131891	0.0087887	0.150069	0.0001855	11	67
LGALS1	411.959	198.955	2.07061	4.76e-06	55	177			L2HGDH	0.191198	0.58205	0.328491	0.0105752	46	160
LGALS3	74.544	19.8412	3.75703	0.00288403	55	176			LACE1	0.0121242	0.0750953	0.161451	0.00425701	12	70
LGALS3BP	4.61061	2.0648	2.23296	1.01e-08	55	177			LAMA2	0.0298207	0.0697379	0.427611	0.0186805	21	96
LGALS9	0.401371	0.0753366	5.3277	5.47e-09	46	90			LAMB4	0.000878182	0.00378712	0.231887	1.28e-06	5	65
LMAN1	11.167	5.52507	2.02114	1.34e-05	55	177			LDHD	0.271669	0.66175	0.410532	0.000573117	23	120
LOX	0.677646	0.0812554	8.33971	1.27e-09	43	67			LDLRAP1	0.00406873	0.0158161	0.257252	0.0035298	7	52
LPCAT1	0.876398	0.357085	2.45431	1.99e-10	55	168			LHFP	0.012734	0.0600503	0.212056	0.00190037	8	57
LPCAT2	0.426682	0.138613	3.07823	0.0018191	52	166			LIMCH1	0.389247	0.813009	0.478773	0.00198449	47	165
LPXN	1.29063	0.158495	8.14305	9.38e-05	52	154			LIMD1	0.0235302	0.0509141	0.462155	0.00398259	39	148
LRRC25	0.225941	0.106404	2.12344	0.00536648	47	131			LIN7A	0.075436	0.27647	0.272854	3.56e-07	17	121
LSM14A	0.460115	0.161516	2.84873	0.0086536	54	168			LLGL2	0.047978	0.157541	0.304543	0.000115653	26	132
LSM4	0.813863	0.35947	2.26407	0.000120614	46	112			LOC101060316	0.00607745	0.0295857	0.205419	9.28e-05	9	71
LSP1	1.34414	0.513806	2.61605	0.000516668	54	167			LPIN2	0.013972	0.0292261	0.478066	0.0231518	29	125
LTF	69.9109	3.71687	18.8091	0.000215574	55	176			LRP2	1.21805	2.66471	0.457106	0.000848539	48	168
LYAR	0.0213456	0.00743972	2.86915	0.00914952	24	44			LRRC1	0.0526078	0.133916	0.392843	0.000375989	32	149
LYN	1.20155	0.410972	2.92367	0.00188644	54	175			LRRC14	0.002532	0.0171237	0.147865	0.000951782	9	67
M6PR	1.74626	0.706042	2.47331	1.56e-10	55	171			LRRC19	0.00849291	0.0297985	0.285012	1.24e-07	4	64
MAGED2	0.673433	0.319294	2.10913	0.000649978	53	161			LRRC32	0.0322056	0.129184	0.2493	7.22e-06	34	156
MAGT1	0.854236	0.234605	3.64117	3.62e-11	55	166			LRRC41	0.0109133	0.0331003	0.329703	0.00142549	22	111
MAN2A2	0.0358796	0.00940757	3.81391	0.0457269	27	63			LRRC8A	0.0532169	0.120721	0.440827	3.89e-06	32	164
MANF	4.8865	1.92043	2.54448	2.1e-05	55	176			LYRM5	0.0913409	0.263343	0.346851	0.0413738	10	53
MAP1B	1.24179	0.554202	2.24068	0.0119735	55	174			LZTS1	0.0435787	0.110719	0.393597	0.000452996	22	116
MAP3K3	0.088972	0.0080609	11.0375	0.0225295	19	39			MACC1	0.0222631	0.0716488	0.310725	0.00109325	18	104
MAP7D1	0.0584333	0.0156262	3.73945	4.17e-06	42	84			MAN2C1	0.186822	0.377401	0.495023	0.0167151	54	173
MAPK14	1.38667	0.58741	2.36064	3.75e-06	55	174			MAP7	0.0343109	0.0756595	0.453491	0.00357089	15	83
MARCKS	0.830541	0.189911	4.37332	0.0442459	48	151			MAPK8	0.00581454	0.0150105	0.387366	4.67e-07	5	72
MBL2	0.0792191	0.0296141	2.67505	0.0393251	20	38			MAPT	0.284673	0.782438	0.363829	5.92e-06	31	151
MBOAT7	0.924989	0.332285	2.78373	9.78e-11	55	170			MARCKSL1	0.0779851	0.900154	0.0866353	1.42e-05	7	65
MCM3	0.403931	0.190992	2.11492	0.00408087	53	165			MCC	0.00854145	0.0473486	0.180395	1.37e-08	7	86
MEPCE	0.0511393	0.0251376	2.03437	0.0119689	39	101			MCF2L	0.0200853	0.0603154	0.333004	2.67e-13	16	144
MGAT1	0.503086	0.18409	2.73283	0.000174804	54	171			MDC1	0.0497505	0.145268	0.342473	0.0147506	27	115
MGAT2	0.490996	0.0683216	7.18654	0.00722184	48	135			MED10	0.0193311	0.104805	0.184449	0.0391114	14	66
MMP14	0.551985	0.222334	2.48268	0.000626739	50	145			MED20	0.0286651	0.0638391	0.449021	0.000120806	17	105
MMP9	0.79904	0.0567781	14.073	0.0106091	45	134			MEF2BNB	0.102153	0.274213	0.372533	6.31e-08	11	103
MMRN1	0.198729	0.0953517	2.08417	0.000223988	44	102			MERTK	0.00520891	0.0136041	0.382893	3.45e-05	6	65
MNDA	5.07221	1.11021	4.5687	7.62e-10	55	176			METAP1D	0.00347454	0.0270277	0.128555	2.78e-07	5	66
MPO	24.2243	0.926737	26.1394	0.00257006	55	176			METTL14	0.151623	0.34847	0.435109	0.0281916	40	151
MPZL1	0.475378	0.113243	4.19785	6.46e-08	48	105			MFAP2	0.180473	0.421666	0.428001	0.000259378	21	118
MRPL46	0.831926	0.280856	2.9621	1.81e-07	54	150			MIA2	0.00708364	0.0663674	0.106734	2.5e-05	15	104
MRPS14	0.153623	0.0685834	2.23994	0.010156	9	61			MMGT1	0.0213829	0.0998481	0.214154	0.00566982	9	55
MS4A6A	0.149439	0.0455582	3.28017	0.0445926	33	87			MPC1	0.061058	0.305419	0.199916	2.96e-06	16	112
MSMO1	0.367341	0.0758596	4.84239	0.00417416	37	92			MPDZ	0.00152109	0.0172452	0.0882037	1.49e-05	9	77
MSR1	0.370312	0.0858467	4.31364	0.0155199	49	151			MPP7	0.00386873	0.0978885	0.0395218	0.00070878	7	51
MST4	0.228967	0.0827528	2.76688	0.00457111	28	53			MRPS33	0.102404	0.333705	0.306871	0.00500001	11	68
MSTO1	0.117196	0.0426812	2.74584	0.00478444	37	89			MRPS36	1.98574	4.12986	0.480825	0.0325891	50	171
MTHFD1L	0.23473	0.104504	2.24613	6.18e-05	49	128			MSRA	0.683529	2.6007	0.262825	0.0041433	53	172
MXRA5	0.275776	0.0766738	3.59675	0.000967152	45	120			MTMR11	0.00331764	0.0520733	0.0637109	0.0131293	8	50
MXRA7	0.834227	0.139136	5.99577	0.00555689	38	104			MYO7A	0.0135307	0.0416093	0.325185	0.000161745	16	103
MXRA8	0.0796895	0.0138578	5.75051	0.00941409	23	44			MYO9A	0.00711418	0.0147907	0.480989	4.61e-08	17	131
MYO1F	0.508878	0.164438	3.09465	2.39e-08	55	170			MZF1	0.000316909	0.00491701	0.0644516	2.93e-09	2	56
MYO1G	0.809178	0.303161	2.66914	4.97e-08	55	166			MZT2B	0.0613393	0.168895	0.363181	0.00398286	9	61
MYO9B	0.320046	0.139242	2.29848	0.014066	53	167			NAGLU	0.119475	0.328151	0.364086	0.00460461	51	173
MZB1	34.1926	0.9586	35.6693	0.000103072	49	143			NAT8	1.12235	4.19375	0.267625	9.66e-05	41	163
NAA20	0.192954	0.0723434	2.66719	0.00382912	40	98			NCKIPSD	0.066634	0.214196	0.311089	0.00411643	48	164
NADK	0.0849262	0.0134894	6.29576	1.64e-06	31	34			NCOA7	0.0176482	0.0509011	0.346715	5.93e-06	20	128
NAIP	0.397212	0.0251404	15.7997	0.00157174	31	62			NDNL2	0.00890818	0.0200642	0.443983	0.0112388	20	100
NAMPT	10.8064	3.3773	3.19972	1.82e-10	55	177			NDRG2	0.21448	0.652129	0.328892	3.43e-05	36	158
NAP1L1	4.95206	2.21287	2.23784	0.0496684	54	177			NDST1	0.00309964	0.00765955	0.404676	0.0138273	7	53
NAT14	0.0957058	0.0192007	4.98449	4.29e-05	33	54			NDUFA7	0.363551	1.51488	0.239987	0.0322509	23	106
NCEH1	8.93077	4.17825	2.13744	6.32e-07	55	177			NDUFB9	3.04191	9.28805	0.327508	0.00412873	55	175
NCF1	1.06639	0.290518	3.67065	6.08e-06	49	129			NEBL	0.0877982	0.311727	0.281651	6.71e-06	25	139
NCF2	0.923311	0.162489	5.6823	6.43e-06	52	140			NFASC	0.00155618	0.0169023	0.0920695	2.82e-05	6	57
NCF4	1.94551	0.254916	7.63199	0.000585757	49	140			NFATC1	0.002656	0.00680774	0.390144	6.49e-07	7	80
NCKAP1L	0.457346	0.140505	3.25502	0.0171192	53	171			NFIB	0.055468	0.14823	0.374203	0.000496521	31	138
NDUFAF2	1.38976	0.680191	2.04318	0.0160996	48	128			NGFR	0.0179569	0.0760564	0.2361	6.29e-06	12	99
NDUFV3	0.370639	0.18002	2.05888	0.0130334	51	158			NID1	7.14859	15.5177	0.460673	1.41e-07	55	177
NEB	0.0200347	0.00348898	5.74228	0.00139909	24	42			NIPSNAP3B	0.0164711	0.162813	0.101166	1.51e-06	4	54
NEFL	22.3487	5.75148	3.88573	3.04e-07	44	84			NOP14	0.0188429	0.0851786	0.221217	0.0488787	29	116
NEU1	0.187435	0.0753264	2.48831	1.15e-07	52	130			NOSTRIN	0.0671502	0.215184	0.312059	1.16e-07	29	157
NNMT	48.0496	10.5327	4.56196	2.54e-16	55	168			NOTCH3	0.0277785	0.072228	0.384595	0.00014309	33	151
NOB1	0.0415602	0.0189603	2.19196	0.0328047	34	90			NOVA2	0.00196946	0.0273411	0.0720328	3.44e-09	3	60
NONO	13.2491	6.50618	2.03638	4.53e-05	55	176			NPR3	0.0257462	0.128531	0.200311	8.07e-09	11	108
NOX3	0.4233	0.035816	11.8187	0.00215956	36	83			NR2F2	0.0570447	0.117453	0.485681	1.15e-06	19	127
NR3C1	0.522746	0.155061	3.37122	0.00110242	52	151			NSL1	0.0350649	0.10578	0.33149	1.89e-05	18	115
NRP2	0.123309	0.0349848	3.52463	0.000631676	38	86			NSMCE4A	0.00495164	0.0284251	0.174199	0.00226945	11	72
NSUN4	0.240728	0.0933702	2.57821	0.0007194	29	45			NTN4	0.0599387	0.18466	0.32459	8.07e-07	22	142
NUCB2	1.37708	0.600885	2.29176	8.6e-08	55	170			NUBPL	0.0697035	0.175586	0.396977	0.000148125	36	160
NUP50	0.864604	0.329274	2.62579	2.84e-06	55	161			NUDT12	0.317206	0.956653	0.331579	0.000228817	32	151
NUP93	1.14698	0.551723	2.07891	1.67e-05	55	175			NUDT14	0.119953	0.389548	0.307929	7.17e-06	33	156
OAS2	1.21809	0.465517	2.61664	0.00030102	54	162			NUDT8	0.0342916	0.111727	0.306924	0.0254747	11	62
OGFR	0.221309	0.105459	2.09852	3.71e-06	55	166			ODF2	0.0521253	0.167911	0.310434	4.19e-05	26	140
OLFM4	1.24577	0.0897083	13.8869	1.01e-05	28	30			OGDHL	0.566713	3.2109	0.176497	6.57e-05	34	154
ORM1	361.446	160.047	2.25837	0.000113703	55	177			OR4C16	0.00775273	0.0735086	0.105467	8.43e-07	5	64
OSBPL3	0.195296	0.0372525	5.24249	4.59e-06	49	128			OXCT1	0.888587	5.61668	0.158205	0.0399756	54	174
OTUD6B	0.174191	0.0520569	3.34616	0.0128474	36	90			P2RY8	0.00303836	0.0149708	0.202952	7.99e-08	4	63
OXA1L	0.89958	0.22464	4.00454	0.00159304	37	82			PACS2	0.0203571	0.0522098	0.389909	0.00037589	21	113
P2RX4	0.37927	0.147944	2.56361	0.00566163	49	143			PALM	0.0480584	0.152871	0.314373	0.0398909	24	109
P4HA1	4.41142	1.59631	2.76351	4.51e-10	55	177			PALM3	0.0516264	0.10859	0.475423	0.0134073	30	127
P4HA2	2.70162	1.05525	2.56016	6.71e-10	55	166			PALMD	0.00764273	0.0261212	0.292587	2.04e-08	10	102
P4HB	154.216	59.3814	2.59705	2.8e-09	55	177			PAPLN	0.0505845	0.191083	0.264725	2.13e-06	30	147
PA2G4	7.2973	3.45033	2.11495	2.79e-09	55	177			PCCB	1.4551	4.17709	0.348353	0.0262187	55	176
PADI2	0.837353	0.146183	5.7281	0.00385501	46	131			PCK1	0.27472	1.12571	0.244041	4.35e-06	23	129
PAPSS2	1.98326	0.654799	3.02881	2.01e-07	54	167			PCK2	2.23745	12.7906	0.174929	0.0407497	55	177
PARP12	0.0749162	0.0193764	3.86635	2.41e-06	46	104			PCNT	0.044096	0.0888251	0.496436	0.00373185	37	153
PARP14	0.312122	0.135077	2.3107	9.21e-05	55	168			PDE5A	0.00713018	0.0235082	0.303306	0.0051169	9	61
PARP16	0.0312949	0.0130422	2.39951	0.042767	23	50			PDF	0.0815555	0.212026	0.384648	0.00366442	30	131
PARVG	0.707365	0.126187	5.60569	0.00110241	49	147			PDLIM2	0.321023	0.712168	0.450768	0.0173677	50	169
PBXIP1	1.26711	0.496639	2.55137	8.83e-07	55	174			PDZK1	2.27728	4.82541	0.471934	0.00649734	49	170
PCNA	1.60417	0.67215	2.38662	5.22e-08	55	167			PEAK1	0.00875982	0.03147	0.278355	5.5e-09	16	128
PCNP	0.132628	0.0535024	2.47892	0.00239856	29	55			PEBP1	81.6057	187.892	0.434323	0.000491007	55	177
PDE4D	0.447785	0.063927	7.00464	0.00025895	45	119			PECR	0.902771	2.12782	0.424271	0.00567942	45	163
PDIA4	21.0744	8.24852	2.55493	4.49e-07	55	176			PEX1	0.0317389	0.0699074	0.454014	0.0319632	31	126
PES1	0.0858862	0.0364132	2.35866	0.000535786	51	144			PEX11G	0.0125187	0.0517594	0.241864	1.79e-06	12	96
PGAM5	0.917934	0.456916	2.00898	0.0094558	50	151			PGM5	0.418679	0.955083	0.43837	0.0261498	48	170
PGD	4.69597	2.2446	2.09212	1.48e-05	55	177			PHACTR4	0.006192	0.0126067	0.491166	0.00603906	19	98
PHLDA3	0.306687	0.0379951	8.07173	0.00215648	29	53			PHYH	0.0518451	0.281555	0.184139	0.000115344	17	99
PIK3CD	0.0302542	0.00928011	3.26011	0.00586401	37	89			PHYHD1	0.0403578	0.205454	0.196432	1e-06	7	74
PITRM1	1.50906	0.596815	2.52852	4.81e-08	55	172			PHYHIPL	0.0517224	0.268959	0.192305	8.06e-06	12	96
PLBD2	0.28144	0.0864845	3.25423	3.68e-09	53	141			PI16	0.0150522	0.048656	0.309359	0.00654664	8	56
PLEK	1.00647	0.398478	2.52578	0.000304736	54	167			PIK3CA	0.0120382	0.15344	0.0784555	0.0117326	25	115
PLEKHO2	0.858089	0.385641	2.2251	9.34e-06	55	175			PIPOX	0.0991487	0.638156	0.155367	0.000215835	17	107
PLG	31.4317	11.1612	2.81615	0.000854769	55	177			PITPNC1	0.0190576	0.0538919	0.353627	2.09e-06	8	81
PLOD1	1.81272	0.704976	2.57132	0.000103898	55	177			PKP4	0.127169	0.320888	0.396302	0.046186	48	163
PLOD2	7.40077	2.95238	2.50671	2.13e-10	55	169			PLA2G4C	0.0294004	0.0858158	0.342599	2.61e-05	23	128
PLOD3	3.45943	1.23058	2.81123	1.57e-08	55	176			PLAC9	0.0664882	0.199828	0.332727	0.0349208	10	57
PLP2	0.799225	0.184331	4.33582	0.000374215	37	79			PLAT	0.0212264	0.0456167	0.46532	1.6e-07	10	102
PLS1	4.74263	2.31429	2.04928	0.0422223	54	174			PLCB1	0.127673	0.259572	0.491858	0.000560976	36	157
PLSCR1	0.581835	0.25789	2.25613	2e-07	42	69			PLCD1	0.0926002	0.248914	0.372017	1.14e-05	34	158
PLTP	3.63275	0.375788	9.66701	2.59e-09	52	139			PLCL1	0.00188346	0.0721388	0.0261088	4.19e-09	6	80
PLXNA1	0.0199724	0.00613073	3.25774	0.0199089	37	103			PLEKHA7	0.0777509	0.202304	0.384326	0.00199535	45	160
PML	2.43579	0.9752	2.49774	1.09e-09	55	176			PLGRKT	0.709045	1.43968	0.492503	0.00829694	40	92
PMM2	1.45297	0.703455	2.06547	0.000108771	54	168			PLIN2	3.64894	18.6028	0.19615	0.0115913	54	170
PNMA2	0.218901	0.099196	2.20675	0.0190847	39	98			PLVAP	0.897508	3.39232	0.26457	1.09e-05	53	175
PNPLA2	0.233142	0.109683	2.12561	0.0216317	22	106			PLXDC1	0.00734964	0.026487	0.277481	5.85e-06	12	97
PON2	7.52898	1.85942	4.0491	1.33e-09	55	176			PLXNB1	0.00137036	0.00773876	0.177078	0.000546333	8	61
PPHLN1	0.0522569	0.0222663	2.34691	0.0155984	32	74			PNPLA4	0.0177382	0.0456002	0.388993	1.24e-05	5	63
PPIC	1.07567	0.431372	2.49361	2.48e-06	54	158			POLG2	0.0453884	0.107097	0.423805	0.00036211	19	113
PPID	0.317331	0.131507	2.41303	4.22e-05	52	147			POMT1	0.00361055	0.0145876	0.247508	7.78e-05	7	67
PPIH	3.63675	1.11557	3.25999	0.000151904	55	172			PPAP2A	0.218361	0.606052	0.360301	0.00405733	38	148
PPIL1	1.01467	0.387905	2.61577	0.00398337	52	154			PPAP2B	0.566239	3.34417	0.169321	3.02e-05	52	172
PPIP5K2	0.222159	0.0691006	3.21501	0.0372173	51	157			PPFIBP2	0.0525785	0.130668	0.402382	0.0098686	33	131
PPME1	3.91598	1.09043	3.59123	5.68e-05	55	176			PRKAR2B	0.292569	0.604823	0.483726	0.047353	37	137
PPP1R11	0.377065	0.153457	2.45714	0.000558667	39	86			PRKCZ	0.00530236	0.0134532	0.394133	0.00243689	12	75
PPP1R18	0.39557	0.13805	2.86542	0.00988244	50	147			PRKD1	0.0118075	0.0595235	0.198366	0.00129076	24	111
PPP4C	2.07474	0.997519	2.0799	0.0247601	54	174			PRR14	0.0109873	0.0378055	0.290626	0.000701181	15	89
PRKCB	0.396436	0.146854	2.69953	0.000634836	46	125			PRRC2A	0.0258227	0.115612	0.223357	0.0334638	30	137
PRKCD	0.499769	0.197006	2.53682	0.0050753	54	170			PRUNE2	0.169187	0.341861	0.494901	0.00943031	44	158
PROS1	1.14916	0.487798	2.35581	7.22e-08	55	177			PSPH	0.495993	1.06455	0.465916	0.0136888	46	168
PRPF39	1.2094	0.519875	2.32633	0.00354643	39	156			PTAR1	0.0150235	0.0348801	0.430718	4.77e-05	16	110
PRTN3	8.64124	1.01731	8.49418	0.000136041	47	117			PTPN13	0.00570146	0.0409963	0.139073	3.9e-05	7	73
PSAT1	4.82292	1.29927	3.71202	1.68e-07	48	107			PTPRA	0.0840573	0.236014	0.356154	0.0226213	50	163
PSENEN	0.104558	0.0395296	2.64506	0.0137989	26	53			PTPRB	0.00343636	0.0189875	0.18098	5.42e-11	15	128
PSME4	0.0350169	0.00466932	7.49936	0.0163531	32	80			PTPRG	0.0520324	0.205501	0.253198	2.53e-10	27	165
PSMG2	0.0776256	0.0225949	3.43554	4.96e-05	34	58			PTPRS	0.00261073	0.00967853	0.269744	0.000569854	6	57
PSTPIP2	0.365363	0.131186	2.78509	0.0212391	27	63			PTPRU	0.00628618	0.0302198	0.208016	4.86e-09	11	107
PTBP2	1.09449	0.334786	3.26921	0.0355539	45	143			PYROXD2	0.0339911	0.0816598	0.416252	0.0112066	14	78
PTK2B	0.350018	0.0871764	4.01506	0.00564819	44	125			QPRT	1.42633	3.84974	0.3705	0.0481591	47	161
PTPRC	4.50284	1.35543	3.32207	1.28e-07	55	176			RAB11FIP2	0.0106825	0.0487177	0.219274	8.34e-05	11	83
PTPRCAP	0.246313	0.0592575	4.15665	0.000106284	36	69			RAB11FIP3	0.0151418	0.0860986	0.175866	3.4e-10	15	132
PTPRF	0.0709569	0.0280702	2.52784	1.24e-05	42	85			RAB19	0.0651645	0.189741	0.343439	0.00129187	20	110
PTPRJ	0.169585	0.048939	3.46522	0.0143993	50	156			RAB3IL1	0.0404913	0.0814136	0.497353	0.00589496	13	77
PYCARD	3.56718	1.29401	2.75668	1.67e-08	55	173			RABIF	1.83707	4.26814	0.430414	0.00609671	41	154
PYCR1	0.653134	0.274056	2.38321	1.11e-07	38	49			RALGAPA1	0.0126002	0.0658405	0.191374	3.26e-06	34	150
PYCR2	0.717258	0.352914	2.03239	8.02e-09	54	142			RAP1GAP	0.00665636	0.0210055	0.316887	1.26e-05	5	60
QSOX1	1.76862	0.178933	9.88423	7.92e-05	51	157			RAPGEF2	0.0264349	0.0720798	0.366745	2.3e-06	23	135
RAB15	34.6182	15.082	2.29533	3.37e-09	55	174			RASAL2	0.00109582	0.00422418	0.259416	5.19e-06	8	79
RAB3A	0.123083	0.0583471	2.10949	0.0422429	21	43			RASIP1	0.188507	0.404371	0.466173	0.00106265	46	168
RAB4A	0.60353	0.251948	2.39545	6.77e-05	51	135			RBM25	1.78588	8.21773	0.21732	0.00242748	55	172
RAB4B	0.618742	0.243602	2.53997	3.3e-06	54	158			RBP4	3.47461	12.4781	0.278456	5.79e-06	55	177
RAC2	6.1164	1.93943	3.15372	0.000533954	54	171			RBP7	0.212533	0.990943	0.214475	4.63e-05	24	129
RANBP1	3.39791	1.52424	2.22924	1.32e-10	55	172			RBPMS2	0.0151675	0.0628284	0.241411	1.62e-05	4	54
RARRES2	1.50711	0.500946	3.00853	0.000798229	53	163			RCBTB2	0.00647564	0.0287608	0.225155	4.33e-07	9	91
RASSF2	0.364351	0.0737766	4.93856	8.68e-05	37	71			RECK	0.00481946	0.0123932	0.388878	0.000174843	18	107
RBCK1	0.0988489	0.0303648	3.25538	5.72e-06	46	110			REEP3	0.0174576	0.107629	0.162202	4.83e-05	8	72
RBM10	0.364244	0.159278	2.28684	0.00567004	53	163			RETSAT	0.166989	0.680287	0.245468	0.00468456	48	169
RCN1	9.06727	3.88298	2.33513	4.85e-06	55	176			RGCC	0.00952727	0.0588901	0.161781	1.69e-10	5	82
RCN3	0.941079	0.414461	2.27061	0.0299226	50	151			RGL2	0.0217742	0.0560221	0.388671	0.000329222	27	136
REEP5	3.38408	1.49254	2.26733	4.74e-07	54	159			RGN	0.190514	0.727423	0.261902	0.000401754	40	158
REL	0.0597895	0.0215212	2.77816	0.00864049	23	41			RILP	0.0182156	0.0515318	0.353483	5.2e-05	19	114
RER1	2.59183	1.23987	2.09041	6.16e-05	55	165			RNLS	0.0491731	0.142471	0.345144	6.23e-06	13	99
RFC2	0.271259	0.030585	8.86904	1.14e-05	39	73			ROGDI	0.0141987	0.0326977	0.434242	0.0344478	22	97
RFC3	0.150533	0.0534051	2.8187	0.000153871	42	86			RPL35	0.547139	1.13703	0.481201	0.00704764	31	133
RGS19	0.158366	0.0674679	2.34728	0.00767726	43	115			RUFY2	0.0633155	0.147616	0.42892	0.0142166	40	153
RHBDF2	0.0294253	0.00575605	5.11206	0.0414612	26	65			S1PR1	0.0167033	0.0452613	0.369041	9.27e-06	7	72
RHOG	4.78545	1.6596	2.8835	7.64e-06	55	175			SARDH	0.100524	0.428389	0.234655	0.000824844	34	147
RIN3	0.0387482	0.0142155	2.72577	0.00741105	30	63			SAT2	0.0774447	0.187166	0.413776	6.52e-05	19	115
RIPK4	0.0101795	0.00327113	3.11191	0.0371226	8	58			SCLY	0.167777	0.379351	0.442273	0.000210118	44	166
RMND5A	0.226511	0.0593835	3.81437	0.0198214	25	119			SCRN3	0.346391	0.754835	0.458896	0.0130052	43	162
RNASE3	2.14976	0.342639	6.27412	1.7e-06	31	34			SDR39U1	0.0422287	0.173412	0.243517	0.000144535	17	105
RNASET2	6.7001	3.0669	2.18465	2.12e-06	55	172			SENP3	0.0266009	0.0968134	0.274765	0.00732526	30	130
RNF114	0.219136	0.0745644	2.93888	0.00248261	48	137			SENP7	0.00211582	0.00634734	0.333339	0.000512229	8	69
RNF130	0.0505285	0.0155074	3.25835	2.45e-08	38	46			SEPN1	0.00626873	0.0175132	0.357944	0.00419754	7	54
RPL12	19.6403	8.79995	2.23186	2.04e-08	55	176			SEPSECS	0.128375	0.289407	0.443579	0.000299128	43	163
RPL38	22.19	9.11493	2.43447	9.45e-06	55	175			SESTD1	0.00417018	0.0135147	0.308567	5.43e-05	9	77
RPL7	5.60594	2.45445	2.28399	8.06e-11	55	175			SFXN2	0.303142	0.886508	0.341951	0.0262676	42	155
RPLP1	17.6949	6.26633	2.8238	2.05e-05	54	164			SH3BGRL2	0.594595	1.22232	0.486447	0.000668882	42	165
RPS18	1.94039	0.738589	2.62716	0.000169058	52	149			SHANK3	0.0152413	0.0377892	0.403323	9.85e-11	18	148
RPS19	8.99557	3.94491	2.2803	3.99e-07	55	176			SHMT1	6.86459	17.2213	0.39861	0.000119822	55	177
RPS25	19.3115	4.52096	4.27155	2.26e-07	54	172			SHROOM2	0.00311582	0.00763655	0.408014	0.0059363	8	60
RPS26	2.68955	1.27269	2.11328	0.000589216	51	142			SHROOM4	0.00222727	0.0446982	0.0498291	9.73e-10	5	69
RPS27L	3.43733	1.02766	3.3448	4.5e-06	42	80			SIGIRR	0.0119713	0.0445102	0.268956	1.13e-05	13	96
RRAD	0.870581	0.163644	5.31996	0.000362877	48	133			SIPA1L2	0.00661218	0.0188949	0.349946	8.05e-08	8	88
RRM1	0.0474491	0.0136064	3.48727	0.0296402	35	94			SLAIN2	0.0385873	0.0864948	0.446122	0.00165209	25	119
RRP12	0.231062	0.0950089	2.43201	0.00246525	52	160			SLC12A2	0.0232007	0.0506524	0.458038	0.000720384	31	139
RRP9	0.157234	0.049882	3.15211	6.49e-09	50	115			SLC17A3	0.033234	0.0904878	0.367276	0.0017053	8	63
RTF1	0.106769	0.0350549	3.04576	0.0441633	37	106			SLC22A11	0.0663693	0.168562	0.393737	1.53e-08	14	123
RTN1	0.435515	0.131751	3.3056	4.48e-07	53	150			SLC22A2	0.0706364	0.190399	0.370991	0.000477596	25	124
RTN2	0.211535	0.0343406	6.1599	3.71e-05	33	58			SLC22A5	0.00985927	0.0436018	0.226121	8.1e-10	9	105
RTN3	3.52891	1.38115	2.55505	2.39e-11	55	174			SLC25A30	0.0253484	0.115543	0.219384	0.00453687	19	92
RUNX1	0.338429	0.0819686	4.12876	0.00475076	28	53			SLC25A42	0.0424571	0.122938	0.345353	4.49e-05	11	91
S100A10	618.898	277.721	2.22849	1.02e-06	55	176			SLC27A2	0.455536	1.44901	0.314378	0.000119344	46	165
S100A4	34.0855	10.0282	3.39897	1.22e-10	55	177			SLC28A1	0.0370027	0.117947	0.313724	2.1e-06	10	92
S100A8	58.966	2.86001	20.6174	0.000280772	53	164			SLC2A8	0.0135738	0.065502	0.207228	8.55e-05	9	72
S100B	0.246779	0.0815564	3.02587	0.0215465	21	38			SLC3A1	0.33842	0.781218	0.433195	0.00149112	45	163
SAMD9	0.0520311	0.0227686	2.28521	0.0222271	44	122			SLC44A3	0.024716	0.0696028	0.355101	9.51e-05	17	108
SASH3	0.17007	0.031355	5.42402	2.61e-06	38	63			SLC4A1	4.88097	11.2518	0.433793	7.02e-05	55	177
SCAMP4	2.14237	0.759491	2.8208	4.18e-06	43	82			SLC5A1	0.221964	0.460761	0.481735	2.29e-06	11	95
SDC2	0.167943	0.021986	7.63862	0.0318246	8	54			SLC5A10	0.0174325	0.145549	0.119771	1.28e-12	6	101
SDHC	3.41112	1.68706	2.02194	5.6e-13	55	141			SLC5A12	0.099192	0.839754	0.11812	3.87e-09	19	140
SEC14L2	0.575523	0.129196	4.45465	0.0486393	38	105			SLC6A12	0.051496	0.110187	0.467352	0.0431067	17	80
SEC24D	0.341786	0.133369	2.56271	0.00131423	54	172			SLC6A13	0.0855556	0.557878	0.153359	5.4e-08	19	127
SEC61B	1.69009	0.381684	4.42798	0.000267066	47	126			SLC6A19	0.0309815	0.276196	0.112172	5.46e-11	7	97
SEC63	0.675878	0.301127	2.24449	4.51e-07	55	173			SLC9A3R2	0.497839	1.68077	0.296197	1.14e-05	42	167
SEMA4B	0.162287	0.0192208	8.44328	0.000220567	39	89			SLCO2A1	0.0391176	0.371718	0.105235	6.76e-13	18	143
SERBP1	2.6441	0.781978	3.3813	7.01e-12	55	171			SLFN12L	0.0259002	0.0681408	0.380098	0.0429542	14	74
SERPINA3	62.9391	30.919	2.03561	0.000194582	55	176			SLIT3	0.00699418	0.0242027	0.288984	5.31e-13	7	110
SERPINB8	0.379927	0.184007	2.06475	0.002405	46	119			SMIM1	0.240319	0.536613	0.447843	0.00112747	13	82
SERPINE1	2.59305	0.104373	24.8441	7.91e-08	36	48			SMIM4	0.0881024	0.370352	0.237888	0.00715549	12	66
SERPINF2	5.13201	2.34199	2.1913	0.0366629	55	177			SMUG1	0.0303313	0.0665076	0.456057	0.0100666	13	73
SF3B5	0.996146	0.349398	2.85103	0.000357969	43	106			SNTA1	0.0115	0.0525662	0.218772	2.24e-09	5	85
SFN	13.7567	5.08301	2.70641	2.34e-05	35	52			SNX13	0.0120869	0.0358062	0.337565	0.00209772	17	97
SH3BP1	0.473284	0.208923	2.26535	0.000103717	54	166			SOWAHC	0.0377238	0.0770689	0.489482	0.00287497	24	117
SKAP2	0.362156	0.0887392	4.08112	7.71e-09	49	103			SP3	0.0147216	0.0528536	0.278536	0.0129188	16	78
SLC15A3	0.104206	0.0404793	2.5743	0.032102	43	123			SPATA18	0.01722	0.10798	0.159474	1.38e-05	15	102
SLC15A4	0.0992209	0.0259577	3.8224	6.83e-10	40	45			SPTLC3	0.00681091	0.0138079	0.493263	3.87e-05	5	58
SLC16A1	0.564148	0.178514	3.16024	8.88e-06	50	136			SRBD1	0.0295078	0.0660524	0.446734	0.00387686	42	160
SLC16A3	1.51787	0.608918	2.49274	6.34e-05	54	171			STAP2	0.0126342	0.0416841	0.303093	0.000651763	17	98
SLC1A5	0.647955	0.293763	2.2057	0.00693361	53	164			STON2	0.0236753	0.0495155	0.478138	0.0240038	21	102
SLC25A19	0.130483	0.0362916	3.59542	0.000460375	36	76			STX17	0.0443104	0.090007	0.492299	0.0107108	28	123
SLC25A20	4.31083	0.710148	6.07033	0.0128543	53	158			STXBP1	0.0483176	0.204966	0.235734	2.48e-07	38	170
SLC25A3	23.4937	11.1813	2.10115	1.81e-08	55	177			SUFU	0.0268775	0.0612288	0.438967	0.000814078	9	67
SLC29A3	0.0193318	0.00341508	5.66071	0.000238268	30	50			SUSD2	0.255091	0.524138	0.486687	0.000694771	46	171
SLC2A3	1.76382	0.296346	5.9519	0.0131089	48	151			SZT2	0.00320236	0.00995254	0.321763	4.08e-07	12	107
SLC30A6	0.331674	0.124761	2.65847	0.0223648	40	102			TANC1	0.00527073	0.0295673	0.178262	6.91e-13	16	146
SLC30A7	1.7009	0.605231	2.81034	0.000728832	53	161			TATDN3	0.0582742	0.125041	0.46604	0.00251325	37	149
SLC35B1	0.180625	0.0743586	2.42911	0.00588531	47	130			TBC1D4	0.0388171	0.147652	0.262896	0.000265003	41	162
SLC38A10	0.0939945	0.035279	2.66432	0.0361563	45	128			TDRP	0.00490873	0.0597633	0.0821362	0.000381854	7	57
SLC39A11	0.144563	0.0202085	7.15356	3.35e-07	41	77			TEAD1	0.0154998	0.03898	0.397635	0.0225235	26	111
SLC43A3	0.0905193	0.0227278	3.98276	2.14e-06	39	65			TEK	1e-05	0.033292	0.000300372	3.43e-16	0	58
SLC4A10	0.016426	0.00243927	6.73399	0.0220251	22	52			TENC1	0.129013	0.405173	0.318415	1.37e-05	43	168
SLC4A2	1.20956	0.077048	15.6988	0.00124825	43	108			TGFBR2	0.025938	0.0708386	0.366156	0.00873821	16	84
SLC7A5	0.084962	0.0105158	8.07945	5.49e-09	34	27			THNSL2	0.0169849	0.10783	0.157515	3.97e-13	8	111
SLC9A1	0.10483	0.0367084	2.85574	0.0316416	42	118			THSD7A	0.00456436	0.0142533	0.320233	1.42e-07	11	104
SLC9A9	0.124988	0.0319698	3.90957	0.0278782	29	71			THY1	22.6864	53.0958	0.427272	0.000816486	54	176
SLCO2B1	0.0261153	0.00825164	3.16486	0.0383474	21	43			TIMM10B	0.152684	0.329565	0.463289	0.0124419	24	113
SLFN11	0.0859976	0.0215422	3.99205	0.000196427	38	80			TIMM21	0.0687498	0.181139	0.379541	0.0157376	31	128
SLPI	0.16908	0.0357698	4.72689	0.000106468	26	32			TINAG	0.308235	0.699199	0.440841	8.11e-05	20	121
SMC2	0.172572	0.0108749	15.8688	0.00396438	29	61			TM4SF18	0.0387967	0.113357	0.342254	5.15e-07	13	104
SMG8	0.0500865	0.0196639	2.54713	0.0212822	39	106			TMEM102	0.0465998	0.162635	0.28653	0.000276795	16	93
SNW1	0.537951	0.151863	3.54234	0.0280955	52	159			TMEM132E	0.00142946	0.0197849	0.0722499	1.06e-07	3	55
SPCS1	3.33719	0.304333	10.9656	5.49e-11	45	73			TMEM27	0.1185	0.478156	0.247826	4.3e-09	17	136
SPCS2	2.7843	0.805767	3.45547	1.69e-06	55	171			TMOD2	1.36144	3.0059	0.452924	0.03314	42	155
SPECC1	0.273392	0.0896084	3.05097	0.0141283	37	89			TNRC6B	0.00224236	0.00510565	0.439193	0.000250336	12	87
SPP1	1.67786	0.136036	12.3339	2.55e-12	45	66			TPPP	0.0833942	0.429758	0.194049	0.000411214	27	131
SRPK1	0.562144	0.0786286	7.14936	0.0150383	42	120			TRAPPC8	0.0867853	0.274161	0.316549	1.15e-06	36	165
SRPRB	4.5978	1.72661	2.66291	5.08e-08	55	176			TRIM2	0.161245	0.39152	0.411843	4.1e-08	29	155
SRPX2	1.13322	0.260739	4.34618	0.000177565	45	115			TRMT5	0.0472085	0.100595	0.469293	0.00206745	18	96
SSR1	4.99369	1.42256	3.51035	1.56e-09	55	171			TRMU	0.0303264	0.0747673	0.40561	0.0267385	10	55
SSR3	4.67092	1.42767	3.27171	0.0348891	50	159			TRPV4	0.0106984	0.0723511	0.147867	5.58e-08	14	112
SSRP1	1.58254	0.78642	2.01233	0.0102944	55	174			TSC1	0.000896545	0.0123241	0.0727472	2.72e-09	4	70
STARD3NL	0.112655	0.0479733	2.34828	0.00828616	23	40			TSC2	0.0113825	0.0493705	0.230554	0.00102975	31	139
STAT1	18.3068	8.39025	2.18192	2.88e-05	55	177			TSPAN33	0.0264584	0.0857717	0.308474	4.83e-05	14	98
STAT2	0.521547	0.245018	2.12861	9e-05	55	175			TTC28	0.00896873	0.0193204	0.46421	0.000724076	27	136
STEAP3	0.584951	0.132096	4.42822	9.46e-11	47	87			TTC39B	0.0370942	0.119021	0.311661	0.000979743	37	148
STIM1	0.798124	0.322982	2.47111	1.91e-08	55	174			TUBA8	2.78136	9.82807	0.283002	0.00901546	8	52
STK39	1.1417	0.534879	2.13451	0.00966162	53	169			UGT2A3	1.60297	3.87406	0.41377	0.00281526	46	164
STT3A	4.98837	2.28812	2.18012	3.25e-06	55	176			UGT2B4	0.00810782	0.895793	0.00905099	3.97e-11	2	58
STT3B	1.4045	0.615576	2.28161	3.66e-06	55	176			UGT2B7	2.78967	6.83376	0.408218	0.00487241	44	159
STX11	0.17003	0.0609092	2.79153	0.0134118	31	74			UGT8	0.00860454	0.0188208	0.457182	0.0354089	10	58
SYK	0.616013	0.170734	3.60804	8.44e-07	53	151			UHRF2	0.006768	0.0380347	0.177943	0.00011436	21	112
SYNGR2	2.4822	0.600543	4.13325	4.46e-18	55	152			UNC13B	0.00837764	0.0437755	0.191377	5.65e-08	18	131
TACO1	0.933808	0.444624	2.10022	0.00591827	53	163			UNC5B	0.000860364	0.0071961	0.11956	8.97e-08	3	56
TAF7	0.329804	0.0582661	5.66031	0.0162641	33	77			UNK	0.000584	0.0062604	0.0932848	1.13e-08	3	58
TAF9	0.332299	0.126453	2.62784	0.0301824	31	73			UQCRQ	2.58659	13.9632	0.185243	1.7e-06	23	131
TAOK3	0.588384	0.233891	2.51563	0.0115447	54	172			VAV2	0.133445	0.423072	0.315418	0.0327947	50	166
TARS2	0.604602	0.239206	2.52753	2.09e-06	55	158			VEZF1	0.005288	0.0128338	0.412037	0.00484551	11	69
TBC1D2	0.160123	0.0264469	6.05452	7.71e-05	37	77			VIL1	0.509653	1.28835	0.395586	0.00277563	35	147
TBCB	0.94052	0.306213	3.07146	3.44e-06	54	165			VPS13D	0.00280309	0.0106129	0.264122	0.0156848	8	59
TBK1	0.565911	0.228679	2.4747	3.04e-06	55	168			VWA1	4.29188	14.2706	0.30075	7.82e-08	55	176
TBL2	0.90008	0.353248	2.54801	1.25e-14	55	173			WDR20	0.001684	0.0343871	0.0489718	6.37e-08	3	55
TCIRG1	0.722177	0.208478	3.46404	4.75e-08	54	168			WDR24	0.0263567	0.108633	0.242623	0.0179402	33	129
TCOF1	0.0963765	0.0447947	2.15152	6.28e-07	54	151			WDR34	0.00296709	0.0286089	0.103712	2.02e-06	6	69
TECR	3.07365	1.32549	2.31888	0.0327518	54	175			WWC1	0.00258891	0.0174686	0.148204	0.000338137	6	53
TFRC	1.58027	0.550152	2.87243	6.19e-06	55	176			WWC3	0.013278	0.0298886	0.44425	0.00835053	26	119
TGFBI	251.153	70.8659	3.54406	1.12e-05	55	177			WWOX	0.0855845	0.247749	0.345449	1.34e-06	10	97
THBS3	0.260104	0.084212	3.08868	2.43e-06	45	94			XYLB	0.0735522	0.268613	0.273822	4.65e-06	28	145
THEMIS2	0.421873	0.0710869	5.93461	9.34e-13	54	149			ZADH2	0.0698071	0.184689	0.37797	0.0122539	36	143
TIMM44	3.04065	1.44245	2.10797	0.000102399	55	175			ZC3H18	0.0127155	0.0312896	0.40638	0.000318476	30	141
TLR2	0.284005	0.0574634	4.94236	6.18e-06	50	135			ZDHHC13	0.0166795	0.034078	0.48945	0.0250755	18	87
TM9SF3	1.63347	0.624522	2.61555	4.09e-15	55	174			ZER1	0.00387382	0.0271337	0.142768	1.31e-06	19	120
TMCO1	0.435128	0.0844795	5.15069	9.77e-10	42	60			ZMYND11	0.00554091	0.0240029	0.230843	6.82e-05	10	75
TMED3	0.212631	0.0781315	2.72145	0.00540855	37	90			ZNF185	0.0159789	0.0348564	0.458421	0.0150218	21	98
TMED9	6.87675	3.21236	2.14071	2.57e-07	55	176			ZSCAN18	0.00203109	0.0489138	0.0415238	1.4e-08	4	62
TMEM101	0.0756051	0.0151611	4.98677	0.000113872	27	35
TMEM11	0.120803	0.0243662	4.95781	3.13e-05	28	35
TMEM165	0.507526	0.165471	3.06716	2.24e-07	54	161
TMEM167A	2.62459	0.906883	2.89408	9.87e-10	54	142
TMEM198	7.37988	0.801546	9.20706	0.00422486	46	136
TMEM214	0.30855	0.134386	2.296	0.0446263	51	165
TMEM259	0.146561	0.0391745	3.74122	0.0266284	22	108
TMEM50A	0.259692	0.114922	2.25972	0.0206405	41	110
TMEM50B	0.234594	0.109571	2.14103	0.0302356	36	92
TMEM65	1.76933	0.555962	3.18246	2.71e-10	55	162
TMEM87A	0.278146	0.125116	2.2231	5.58e-05	54	163
TMEM87B	0.0569184	0.0111279	5.11492	0.024947	24	53
TMSB10	373.366	107.44	3.4751	0.000363136	55	175
TMSB4X	260.425	61.2311	4.25315	1.67e-07	55	171
TNC	28.5415	13.594	2.09956	0.0335471	55	177
TNFAIP2	0.362753	0.154589	2.34657	0.00352024	53	165
TNIK	0.140731	0.0426661	3.29842	0.00569103	26	47
TNPO3	0.682495	0.279051	2.44577	4.81e-05	55	171
TOR1AIP2	0.118413	0.0519597	2.27894	5.52e-05	44	101
TP53I11	0.322343	0.0830859	3.87964	0.0023255	29	57
TPD52L2	14.6809	6.22156	2.35969	8.33e-09	55	176
TPST2	0.166042	0.0414259	4.00817	2.28e-05	32	48
TRABD	0.0762122	0.0262106	2.90768	2.39e-06	38	59
TRAFD1	0.0378125	0.0119733	3.15806	0.000596811	26	39
TRAPPC5	0.440203	0.156709	2.80904	0.00507328	48	132
TRIM65	0.108363	0.0469332	2.30888	0.00698126	47	130
TRIM9	0.0235385	0.0112332	2.09545	0.00986863	23	40
TRIP4	0.211497	0.0351403	6.01863	0.00249401	44	113
TRMT2A	0.0243933	0.0106858	2.28278	0.0051349	32	69
TTC13	0.0132464	0.00460164	2.87862	0.0372305	20	38
TTC39A	0.511207	0.132923	3.84588	0.0237495	45	126
TTC39C	0.0350624	0.0129551	2.70644	0.000284684	32	51
TTC5	0.123486	0.0448799	2.75147	0.00476746	22	112
TTI1	0.0366704	0.0114902	3.19146	0.00432311	28	61
TXLNA	0.604789	0.185447	3.26125	3.3e-09	53	138
TXNDC12	2.97728	1.46593	2.03099	9.31e-08	55	175
TXNDC5	16.3356	6.52791	2.50243	0.0133477	55	176
UBAC2	0.231082	0.109895	2.10276	0.0316216	44	121
UBE2J1	0.176167	0.0241803	7.28555	3.87e-05	36	65
UBE2O	1.69267	0.182131	9.29367	0.0301328	51	163
UCHL1	7.28343	2.93715	2.47976	0.000267302	46	123
UFC1	1.82508	0.765847	2.38309	1.03e-06	54	159
UGDH	8.70497	3.69924	2.35318	0.00378059	55	176
UNC13D	0.321629	0.0293466	10.9597	0.000664194	38	83
USP39	1.61062	0.492131	3.27275	2.76e-07	55	171
UTP6	0.0345567	0.0108564	3.18306	0.0479054	33	88
VAC14	0.723225	0.352762	2.05018	0.0020645	55	173
VAV1	0.706193	0.103923	6.79536	3.26e-09	52	133
VKORC1	4.0504	1.629	2.48644	0.000792982	49	135
VKORC1L1	1.0882	0.432038	2.51877	2.3e-05	54	157
VMA21	2.00717	0.27012	7.43065	4.44e-10	51	118
VNN1	1.21063	0.139211	8.69636	0.000366368	33	64
VNN2	0.327575	0.0339697	9.64315	4.05e-05	32	53
VSIG4	0.317202	0.0405785	7.817	1.52e-07	34	38
VTN	166.949	37.2733	4.47905	5.41e-05	55	177
WDFY4	0.134899	0.010941	12.3297	0.00977566	38	101
XPNPEP3	3.36645	0.79354	4.24232	1.15e-12	55	171
XPO6	0.0239802	0.00423271	5.66544	0.0308428	24	58
XPOT	0.528807	0.225349	2.34661	3.62e-08	55	171
XRN2	0.659327	0.312918	2.10703	6.57e-06	55	173
YBX1	2.4698	0.54562	4.5266	1.26e-10	51	121
YBX3	1.29435	0.443589	2.9179	0.0265749	49	154
YDJC	3.74329	0.460059	8.13653	0.0235586	12	68
YIPF3	0.239383	0.0929712	2.5748	0.0498655	51	156
YIPF6	0.303312	0.124382	2.43854	4.6e-09	50	108
ZAP70	0.0382511	0.00943932	4.05231	0.0434478	24	51
ZC3H15	0.29794	0.116643	2.55429	0.00068366	47	122
ZC3H7A	0.0467222	0.0159224	2.93437	0.000720503	33	61
ZFPL1	0.233856	0.0581136	4.02412	1.95e-05	47	117
ZMPSTE24	1.54665	0.729467	2.12025	2.58e-05	55	175
ZRANB2	0.464224	0.186208	2.49304	0.0371961	31	73

## Sheet: GP1_pathways
GP1 up-regulated pathways	p-value	q-value	source	external_id	members_input_overlap	members_input_overlap_geneids	size	effective_size			GP1 down-regulated pathways	p-value	q-value	source	external_id	members_input_overlap	members_input_overlap_geneids	size	effective_size
Innate Immune System	4.07622e-25	5.57627e-22	Reactome	R-HSA-168249	RAB4B; IRAK4; C5AR1; FCGR1A; DYNLL1; TXNDC5; LBP; LYN; FGG; FGA; PRTN3; GUSB; RNASE3; HK3; ALOX5; CTSG; CTSZ; PA2G4; SLC15A4; ORM1; SYK; ARPC1B; SLC2A3; CPB2; C1QA; TLR2; CYLD; CD300A; CRP; DOCK2; C1QC; HP; QSOX1; PROS1; HSP90B1; C1QB; ITGB2; S100B; ARHGAP9; DNM3; C4BPA; C4BPB; CARD9; B4GALT1; CD47; GCA; VNN1; ATG12; RHOG; ITGAX; VAV1; MPO; TCIRG1; ITGAM; LCK; NCF2; NCF1; NCF4; AMPD3; GLA; MAPK14…	3428; 80301; 7097; 8560; 6590; 735; 5795; 2244; 84329; 9140; 3684; 11240; 8635; 51411; 4153; 3071; 4353; 3929; 4758; 714; 12; 391; 978; 26052; 84433; 81494; 3689; 4688; 834; 2147; 1511; 5004; 8876; 960; 1432; 3385; 4332; 1401; 7184; 7448; 4318; 53916; 302; 837; 3932; 5768; 4689; 5657; 713; 3937; 81567; 84061; 732; 730; 121260; 1191; 1361; 725; 967; 64170; 1540; 51135; 6037; 6279; 64333; 10312; 55…	1077	1065			Metabolism	4.41722e-25	4.97379e-22	Reactome	R-HSA-1430728	PCK2; PECR; PCK1; NDUFB9; MPC1; PCCB; PLCD1; AOC3; UQCRQ; NOSTRIN; DMGDH; ASS1; ADIPOQ; AGXT2; NDST1; CKB; ACSM5; INPP4B; UGT8; SPTLC3; COX8A; GLO1; ASRGL1; SCLY; ABCD4; UGT2B7; UGT2B4; FMO1; MAN2C1; ADCY5; CRYL1; ACSM2A; ACSM2B; GSTA1; IMPA2; RBP4; GPT; GSTA3; ACOT2; SHMT1; INPP5A; L2HGDH; INPP5F; PTPN13; ALDH1L1; PIPOX; ADCY9; FBP1; ACAT1; RETSAT; BBOX1; NUBPL; GRHPR; CYGB; AMN; GATM; ADAL; PNP…	29958; 4669; 5783; 51660; 54884; 443; 1807; 348158; 8424; 84869; 9663; 111; 137872; 501; 56898; 22977; 130; 7363; 144193; 161823; 115677; 216; 1351; 3291; 95; 81889; 635; 445; 80224; 2167; 4701; 55304; 81693; 9429; 126969; 2766; 1645; 10249; 51292; 3632; 5096; 9370; 55825; 759; 27089; 10591; 2166; 51540; 3340; 114757; 3158; 5577; 2739; 80150; 123876; 125061; 284161; 1644; 7364; 83594; 10449; 5106…	1972	1960
Complement and coagulation cascades - Homo sapiens (human)	1.17155e-22	8.0134e-20	KEGG	path:hsa04610	VSIG4; PROS1; CPB2; C8B; C5AR1; C8G; F13A1; FGB; SERPINE1; MBL2; C4BPA; C4BPB; C9; FGG; C7; FGA; C5; ITGB2; VTN; SERPINF2; CLU; ITGAX; F2; C1QC; C1QB; C1QA; PLG; ITGAM; C1S; C1R	7448; 730; 5627; 1191; 732; 11326; 3684; 4153; 3687; 5054; 2243; 2244; 712; 713; 714; 715; 716; 1361; 722; 727; 2266; 5340; 733; 735; 5345; 2147; 728; 2162; 3689; 725	79	79			Metabolism of amino acids and derivatives	9.16285e-11	4.15312e-08	Reactome	R-HSA-71291	GRHPR; GAMT; CKB; AGXT2; DDC; BHMT2; DMGDH; ASS1; AMDHD1; ASPG; ASPA; GATM; AASS; BBOX1; AFMID; ACAT1; FTCD; SLC6A12; ASRGL1; SCLY; AUH; CRYM; ALDH6A1; DDO; SEPSECS; ALDH7A1; GPT; CHDH; ACMSD; SHMT1; BHMT; PSPH; RPL35; GSTZ1; PIPOX; SARDH	29958; 443; 2628; 2875; 8424; 2593; 64902; 51540; 80150; 501; 38; 125061; 1757; 11224; 55349; 1644; 144193; 130013; 1152; 8528; 10157; 635; 445; 4329; 6470; 23743; 5723; 2954; 374569; 6539; 1428; 51268; 549; 9380; 51091; 10841	342	339
Immune System	2.56298e-22	1.16872e-19	Reactome	R-HSA-168256	RAB4B; UBE2J1; IRAK4; PTK2B; C5AR1; FCGR1A; DYNLL1; TXNDC5; LBP; MAP3K3; PIK3CD; RNF114; OAS2; LYN; FGG; FGA; FGB; GUSB; SLPI; RNASE3; HK3; P4HB; CTSG; SEC24D; CTSZ; PA2G4; SLC15A4; INPP5D; ORM1; SYK; ARPC1B; C1QC; CPB2; C1QA; TLR2; CYLD; CD300A; CRP; EVL; DOCK2; SLC2A3; HP; QSOX1; PROS1; HSP90B1; C1QB; ITGB2; ARHGAP9; DNM3; C4BPA; C4BPB; RNF130; CARD9; B4GALT1; CARD11; GCA; IL5RA; CSK; VNN1; GBP…	5371; 11240; 8635; 3929; 837; 3689; 4688; 834; 2147; 3385; 3965; 55905; 7448; 53916; 3937; 81567; 1361; 64170; 7409; 51465; 1540; 6279; 10312; 3663; 200081; 6515; 3240; 961; 732; 653361; 836; 6773; 3614; 80301; 1536; 730; 80331; 1445; 29110; 712; 4939; 8560; 2244; 9140; 3071; 391; 978; 7097; 1511; 5004; 960; 733; 6772; 6590; 7184; 4318; 715; 996; 302; 7535; 10616; 121260; 3606; 725; 722; 958; 268…	1840	1827			Glycine, serine and threonine metabolism - Homo sapiens (human)	1.10652e-10	4.15312e-08	KEGG	path:hsa00260	GRHPR; GAMT; BHMT; PIPOX; PSPH; AOC3; AGXT2; GATM; SARDH; DMGDH; ALDH7A1; CHDH; SHMT1	64902; 51268; 9380; 29958; 1757; 55349; 8639; 2628; 6470; 2593; 5723; 501; 635	40	40
Neutrophil degranulation	1.60691e-20	5.49565e-18	Reactome	R-HSA-6798695	NCKAP1L; RAB4B; HK3; AMPD3; GLA; HP; QSOX1; MAPK14; PLEKHO2; ANXA2; ARHGAP9; OLFM4; DYNLL1; DNAJC5; RNASET2; BIN2; TLR2; SERPINA3; DOK3; TXNDC5; IMPDH1; DOCK2; S100A8; LPCAT1; B4GALT1; PYCARD; CD47; PRTN3; GUSB; GCA; ITGAX; RNASE3; ITGB2; CD63; CD44; ALOX5; VNN1; PRKCD; CTSG; CYBB; MNDA; UNC13D; PADI2; LTF; RAB3A; LGALS3; RHOG; PA2G4; SLC15A4; CDA; SLPI; DEGS1; ORM1; MPO; HVCN1; SLC2A3; CTSZ; PTP…	8560; 6590; 5795; 8876; 84329; 3684; 11240; 8635; 3071; 4353; 4758; 12; 391; 978; 3689; 1511; 5004; 960; 4057; 124583; 4318; 53916; 302; 5768; 5657; 121260; 81567; 272; 967; 6037; 6279; 64333; 1432; 10312; 5580; 240; 6515; 2683; 3240; 1794; 3958; 84061; 8655; 3687; 201294; 961; 25801; 2717; 51411; 728; 29108; 2990; 1536; 3614; 79930; 80301; 79888; 3101; 1522; 5788; 4332; 80331; 5864; 10562; 11314…	490	485			Butanoate metabolism - Homo sapiens (human)	5.73391e-09	1.29863e-06	KEGG	path:hsa00650	HMGCS2; L2HGDH; BDH2; ACSM5; ACSM2A; ACSM2B; ACAT1; OXCT1; ABAT; EHHADH	18; 5019; 38; 1962; 56898; 79944; 54988; 3158; 123876; 348158	28	28
Microglia Pathogen Phagocytosis Pathway	1.13939e-15	3.11737e-13	Wikipathways	WP3937	NCF2; NCF1; NCKAP1L; RAC2; NCF4; SYK; PIK3CD; C1QC; C1QB; C1QA; CYBB; VAV1; ITGB2; ITGAM; FCGR1A; ARPC1B; HCK; LYN	6850; 5880; 4689; 4067; 2209; 653361; 714; 713; 712; 5293; 3071; 3055; 3689; 10095; 4688; 3684; 1536; 7409	40	40			superpathway of choline degradation to L-serine	5.76658e-09	1.29863e-06	HumanCyc	PWY66-414	BHMT; SARDH; DMGDH; ALDH7A1; CHDH; SHMT1	55349; 635; 29958; 501; 1757; 6470	7	7
Platelet activation, signaling and aggregation	8.25046e-13	1.8811e-10	Reactome	R-HSA-76002	APBB1IP; TMSB4X; QSOX1; PROS1; ECM1; MAPK14; ARRB2; CLU; F13A1; SERPINE1; SERPINA3; PLEK; MMRN1; MANF; LYN; FGG; FGA; FGB; RAC2; CSK; PRKCB; PRKCD; LGALS3BP; FERMT3; SERPINF2; LCP2; RHOG; F2; ORM1; CD63; SYK; MAGED2; RARRES2; CALU; PLG; VAV1; GNA13; LCK	4067; 7114; 7873; 3959; 1432; 2162; 2244; 5580; 22915; 5054; 1893; 10672; 83706; 12; 5919; 5341; 5768; 813; 391; 10916; 2266; 3937; 54518; 2243; 3932; 5579; 2147; 5340; 1445; 409; 5004; 5880; 5627; 5345; 1191; 967; 7409; 6850	260	260			Choline catabolism	1.61815e-07	2.81373e-05	Reactome	R-HSA-6798163	CHDH; SARDH; DMGDH; BHMT; ALDH7A1	501; 635; 29958; 55349; 1757	6	6
Complement and Coagulation Cascades	3.31558e-12	6.4796e-10	Wikipathways	WP558	F2; C1R; PROS1; SERPINF2; C1QC; CPB2; C1QA; C1QB; PLG; C9; C5AR1; LMAN1; C8G; C1S; CLU; C7; SERPINE1; FGB	5054; 730; 1191; 733; 735; 1361; 716; 714; 713; 712; 5345; 5340; 2147; 5627; 715; 2244; 3998; 728	59	59			Valine, leucine and isoleucine degradation - Homo sapiens (human)	1.74921e-07	2.81373e-05	KEGG	path:hsa00280	HMGCS2; ACAA2; PCCB; AUH; AGXT2; ACAT1; ALDH6A1; OXCT1; ABAT; ALDH7A1; EHHADH	3158; 64902; 18; 5019; 549; 38; 1962; 10449; 5096; 4329; 501	48	48
Dengue-2 Interactions with Complement and Coagulation Cascades	4.57148e-12	7.81722e-10	Wikipathways	WP3896	F2; C1R; PROS1; SERPINF2; C1QC; CPB2; C1QA; C1QB; PLG; C9; C5AR1; LMAN1; C8G; C1S; CLU; C7; SERPINE1; FGB	5054; 730; 1191; 733; 735; 1361; 716; 714; 713; 712; 5345; 5340; 2147; 5627; 715; 2244; 3998; 728	60	60			Valine Leucine Isoleucine degradation	3.54324e-07	4.98711e-05	INOH	None	HMGCS2; PCCB; AUH; ACAA2; ALDH6A1; OXCT1; ALDH7A1; EHHADH; ALDH1A1	501; 216; 549; 3158; 10449; 4329; 1962; 5019; 5096	32	32
classical complement pathway	5.24662e-12	7.97486e-10	BioCarta	classicpathway	C1QC; C8B; C1QA; C1QB; C9; C8G; C1S; C1R; C7; C5	730; 716; 735; 714; 732; 715; 733; 712; 727; 713	14	14			Conjugation of salicylate with glycine	1.43439e-06	0.000163597	Reactome	R-HSA-177128	GLYAT; GLYATL1; ACSM5; ACSM2A; ACSM2B	92292; 54988; 123876; 348158; 10249	8	8
Human Complement System	2.49898e-11	3.41861e-09	Wikipathways	WP2806	PLG; CRP; VSIG4; C4BPA; CALR; PROS1; CD40; RPS19; TLR2; C9; C5AR1; ARRB2; C5; SPP1; C1S; F13A1; FGG; C7; FGA; FGB; MBL2	5627; 2244; 811; 2243; 716; 1401; 2266; 2162; 7097; 730; 735; 5340; 727; 722; 409; 6696; 728; 11326; 958; 6223; 4153	92	92			Peroxisome - Homo sapiens (human)	1.4529e-06	0.000163597	KEGG	path:hsa04146	PEX1; EPHX2; PIPOX; ACOX2; PECR; NUDT12; DDO; PEX11G; HAO2; SLC27A2; EHHADH; ABCD4; PHYH	83594; 2053; 5264; 55825; 92960; 1962; 5826; 5189; 8528; 51179; 51268; 8309; 11001	83	83
TYROBP Causal Network	5.01377e-11	6.23531e-09	Wikipathways	WP3945	IL18; ITGAX; NCF2; NCKAP1L; APBB1IP; DPYD; C1QC; TCIRG1; PYCARD; ITGB2; SPP1; ITGAM; SLC1A5; HCLS1; PPP1R18; PLEK; BIN2	51411; 3606; 170954; 6510; 10312; 714; 3071; 3059; 1806; 3689; 5341; 3687; 4688; 3684; 29108; 54518; 6696	60	60			Histidine, lysine, phenylalanine, tyrosine, proline and tryptophan catabolism	1.64248e-06	0.00016813	Reactome	R-HSA-6788656	CRYM; AASS; AFMID; PIPOX; GSTZ1; AMDHD1; FTCD; ALDH7A1; ASRGL1; ACMSD	501; 144193; 10157; 1428; 51268; 2954; 10841; 125061; 80150; 130013	49	48
Response to elevated platelet cytosolic Ca2+	2.14888e-10	2.44973e-08	Reactome	R-HSA-76005	TMSB4X; QSOX1; PROS1; ECM1; F13A1; SERPINE1; SERPINA3; MMRN1; MANF; FGG; FGA; FGB; CD63; PRKCB; LGALS3BP; FERMT3; SERPINF2; CLU; PLEK; ORM1; MAGED2; RARRES2; CALU; PLG	7873; 3959; 2162; 2244; 5345; 5054; 1893; 5919; 5341; 5768; 12; 813; 10916; 2266; 5627; 2243; 83706; 5579; 5340; 22915; 5004; 7114; 1191; 967	134	134			Lysine degradation	2.9382e-06	0.000252975	INOH	None	BBOX1; AASS; ACAT1; ALDH7A1; EHHADH; ALDH1A1; SHMT1	501; 6470; 216; 10157; 38; 1962; 8424	22	22
Platelet degranulation	5.63922e-10	5.9342e-08	Reactome	R-HSA-114608	TMSB4X; QSOX1; PROS1; ECM1; F13A1; SERPINE1; SERPINA3; MMRN1; MANF; FGG; FGA; FGB; CD63; LGALS3BP; FERMT3; SERPINF2; CLU; PLEK; ORM1; MAGED2; RARRES2; CALU; PLG	7114; 7873; 3959; 2162; 2244; 5345; 5054; 1893; 5341; 5768; 12; 813; 10916; 2266; 5627; 2243; 83706; 5340; 22915; 5004; 5919; 1191; 967	129	129			Conjugation of carboxylic acids	3.14534e-06	0.000252975	Reactome	R-HSA-159424	GLYAT; GLYATL1; ACSM5; ACSM2A; ACSM2B	92292; 54988; 123876; 348158; 10249	9	9
Hemostasis	1.133e-09	1.1071e-07	Reactome	R-HSA-109582	SLC7A5; STIM1; APBB1IP; ATP2A3; DOCK2; QSOX1; PROS1; ECM1; MAPK14; SLC16A3; ANXA2; ARRB2; CLU; S100A10; DOCK10; P2RX4; RAC2; SERPINA3; MAGED2; PLEK; MMRN1; PRTN3; SERPINE1; TMSB4X; MANF; LYN; FGG; F13A1; FGB; KIF21B; ITGB2; CD63; CSK; CD44; CD47; PRKCB; PRKCD; LGALS3BP; SERPINB8; SERPINF2; LCP2; RHOG; ITGAX; F2; INPP5D; ORM1; FERMT3; SLC16A1; SYK; SDC2; RARRES2; CALU; KIF2A; FGA; PLG; VAV1; ITGAM…	5025; 3689; 3959; 2244; 3684; 6281; 1893; 10672; 5341; 12; 391; 23046; 6566; 2147; 5004; 960; 1432; 489; 55619; 302; 3932; 5768; 5657; 3937; 5579; 6383; 409; 1191; 967; 7409; 7873; 5054; 2162; 5580; 3796; 22915; 1794; 3687; 961; 10916; 6786; 2266; 5627; 1445; 5340; 3635; 5880; 5345; 6850; 4067; 7114; 5271; 8140; 83706; 5919; 813; 2243; 9123; 54518	668	667			Amino Acid conjugation	3.14534e-06	0.000252975	Reactome	R-HSA-156587	GLYAT; GLYATL1; ACSM5; ACSM2A; ACSM2B	92292; 54988; 123876; 348158; 10249	9	9
Complement Activation	2.57057e-09	2.34436e-07	Wikipathways	WP545	C1QC; C9; C1QA; C1QB; C8B; C8G; C1S; C1R; C7; C5	730; 733; 732; 735; 716; 715; 714; 713; 712; 727	22	22			Glycine Serine metabolism	3.45707e-06	0.000259511	INOH	None	AOC3; GAMT; BHMT; PIPOX; PSPH; AGXT2; GATM; DMGDH; SHMT1	2593; 6470; 8639; 64902; 635; 29958; 2628; 51268; 5723	41	41
Extracellular matrix organization	7.71538e-09	6.59665e-07	Reactome	R-HSA-1474244	MMP14; P4HA2; CD151; P4HA1; ADAM15; LOX; HTRA1; PLOD2; PLOD3; CTSG; PLOD1; SERPINE1; CAPN6; ICAM3; FGG; P4HB; FGB; ITGB2; EFEMP1; CD44; CD47; EFEMP2; FBN1; TNC; VTN; ITGAX; CASP3; SDC2; FGA; PLG; SPP1; ITGAM; MMP9; CRTAP	977; 8985; 10491; 3687; 2244; 3684; 2202; 5351; 5054; 7448; 5654; 5034; 4318; 4323; 827; 3371; 5033; 30008; 961; 6696; 2266; 2200; 3689; 2243; 8974; 8751; 5352; 5340; 6383; 960; 3385; 836; 1511; 4015	294	294			Peroxisomal protein import	3.68897e-06	0.000259612	Reactome	R-HSA-9033241	PEX1; PECR; PIPOX; ACOX2; EHHADH; EPHX2; DDO; HAO2; SLC27A2; ACOT2; PHYH	8309; 11001; 55825; 5264; 51179; 5189; 51268; 10965; 2053; 8528; 1962	64	64
Staphylococcus aureus infection - Homo sapiens (human)	1.20062e-08	9.66145e-07	KEGG	path:hsa05150	ITGB2; FCGR2B; C1QC; C1QB; C1QA; PLG; C5AR1; ITGAM; FCGR1A; C1S; C1R; FGG; C5; MBL2	2209; 2213; 4153; 712; 713; 714; 715; 716; 727; 728; 2266; 5340; 3684; 3689	56	55			glycine betaine degradation	4.40512e-06	0.000291774	HumanCyc	PWY-3661-1	SARDH; BHMT; SHMT1; DMGDH	635; 29958; 1757; 6470	5	5
Regulation of Insulin-like Growth Factor (IGF) transport and uptake by Insulin-like Growth Factor Binding Proteins (IGFBPs)	5.85047e-08	4.44636e-06	Reactome	R-HSA-381426	F2; APOE; FBN1; RCN1; IGFBP3; SDC2; P4HB; QSOX1; CALU; HSP90B1; FSTL1; PLG; PNPLA2; SPP1; TNC; MXRA8; LGALS1; FGG; FGA; CTSG	57104; 11167; 3371; 5034; 54587; 3486; 348; 5768; 813; 6696; 2266; 2200; 2243; 7184; 5954; 2147; 1511; 5340; 3956; 6383	127	126			Biological oxidations	2.42626e-05	0.00151776	Reactome	R-HSA-211859	UGT2B7; AOC3; FMO1; UGT2B4; ADH6; GSTT1; UGT2A3; GSTM3; GLYATL1; ACSM5; GSTA1; ACSM2A; GSTA3; GLYAT; ACSM2B; BPHL; GSTZ1; AKR7A3; ALDH1A1; ACY1	216; 670; 8639; 2952; 2938; 54988; 2326; 95; 2940; 79799; 22977; 123876; 130; 2954; 7363; 348158; 92292; 2947; 7364; 10249	231	226
Complement cascade	7.49757e-08	5.3904e-06	Reactome	R-HSA-166658	CRP; F2; CFHR5; C4BPA; C1QB; C8G; C1QC; C9; CLU; VTN; C8B; C5AR1; C1QA; PROS1; C1S; C1R; CPB2; C7; C4BPB; C5; MBL2	728; 722; 732; 735; 81494; 716; 715; 714; 1401; 7448; 4153; 727; 713; 730; 5627; 2147; 733; 1191; 1361; 712; 725	141	140			Glycine, serine, alanine and threonine metabolism	2.61713e-05	0.00155099	EHMN	Glycine, serine, alanine and threonine metabolism	CKB; PIPOX; SLC22A5; GATM; SARDH; GLYAT; DMGDH; CHDH; LDHD; SLC6A12; HAO2	1152; 6584; 51179; 1757; 6539; 29958; 51268; 55349; 2628; 10249; 197257	78	78
Terminal pathway of complement	7.8807e-08	5.3904e-06	Reactome	R-HSA-166665	C8B; C9; C8G; CLU; C7; C5	730; 1191; 735; 732; 733; 727	8	8			Tryptophan metabolism	4.13825e-05	0.00222279	EHMN	Tryptophan metabolism	AOC3; GSTZ1; ADHFE1; SLC22A2; ALDH7A1; ACMSD	501; 8639; 6582; 137872; 2954; 130013	22	22
Pertussis - Homo sapiens (human)	1.43257e-07	9.33219e-06	KEGG	path:hsa05133	ITGB2; CASP3; CASP1; C4BPA; C4BPB; C1QC; C1QB; C1QA; MAPK14; C5; C1R; C1S; PYCARD; IRAK4; ITGAM	1432; 29108; 51135; 834; 836; 712; 713; 714; 715; 716; 722; 725; 727; 3684; 3689	76	76			Phase II - Conjugation of compounds	4.14553e-05	0.00222279	Reactome	R-HSA-156580	UGT2B7; UGT2B4; GSTM3; GSTT1; UGT2A3; ACSM5; GLYATL1; GSTZ1; GSTA1; ACSM2A; GSTA3; GLYAT; ACSM2B	2952; 7364; 2938; 123876; 2940; 2954; 7363; 54988; 348158; 92292; 2947; 79799; 10249	115	112
Fc gamma R-mediated phagocytosis - Homo sapiens (human)	2.52335e-07	1.56906e-05	KEGG	path:hsa04666	MARCKS; NCF1; INPP5D; SYK; PIK3CD; PRKCB; FCGR2B; PRKCD; VAV1; HCK; PTPRC; FCGR1A; ARPC1B; RAC2; DOCK2; LYN	5293; 3635; 5788; 2209; 2213; 6850; 7409; 5880; 1794; 653361; 10095; 5579; 5580; 4067; 3055; 4082	91	90			Butanoate metabolism	5.45368e-05	0.00279129	EHMN	Butanoate metabolism	HMGCS2; BDH2; OXCT1; ALDH7A1; EHHADH; ECHDC2	501; 55268; 3158; 5019; 1962; 56898	23	23
fibrinolysis pathway	3.07951e-07	1.83164e-05	BioCarta	fibrinolysispathway	F2; CPB2; SERPINE1; PLG; FGG; FGA; FGB	2147; 2266; 2243; 2244; 5054; 1361; 5340	14	14			Metapathway biotransformation Phase I and II	6.57146e-05	0.00321716	Wikipathways	WP702	UGT2B7; UGT2B4; FMO1; GSTT1; AKR7A3; UGT2A3; GSTM3; GLYATL1; GSTZ1; GSTA1; GSTA3; NAT8; GLYAT; NDST1; EPHX2; CYP4X1; AKR1C1	2326; 260293; 7363; 7364; 2938; 1645; 22977; 92292; 10249; 2954; 9027; 2952; 79799; 2947; 2940; 3340; 2053	186	186
Regulation of Complement cascade	4.19698e-07	2.39228e-05	Reactome	R-HSA-977606	PROS1; F2; CFHR5; C4BPA; CPB2; C8G; C1QC; C9; C1QA; VTN; C8B; C5AR1; CLU; C1S; C1R; C7; C4BPB; C5; C1QB	728; 722; 732; 735; 81494; 716; 715; 714; 7448; 1191; 727; 713; 730; 5627; 2147; 733; 1361; 712; 725	130	129			Proton Pump Inhibitor Pathway, Pharmacodynamics	7.28544e-05	0.00341808	PharmGKB	PA152530845	PLCB1; ADCY5; ADCY9; PLCL1; AKT3; PLCD1; PRKD1; PRKCZ	5334; 10000; 115; 23236; 5587; 5333; 5590; 111	46	46
Urokinase-type plasminogen activator (uPA) and uPAR-mediated signaling	5.49201e-07	3.00523e-05	PID	upa_upar_pathway	VTN; ITGB2; CTSG; EGFR; FGA; PLG; ITGAM; MMP9; FGG; SERPINE1; FGB	5340; 1511; 2266; 1956; 5054; 2243; 7448; 2244; 4318; 3689; 3684	44	44			Metabolism of xenobiotics by cytochrome P450 - Homo sapiens (human)	8.81189e-05	0.00365093	KEGG	path:hsa00980	UGT2B7; UGT2B4; ADH6; GSTT1; GSTM3; UGT2A3; GSTA1; GSTA3; AKR7A3; AKR1C1	2947; 2952; 22977; 7364; 79799; 130; 1645; 2938; 2940; 7363	76	74
Post-translational protein phosphorylation	7.47455e-07	3.93276e-05	Reactome	R-HSA-8957275	APOE; FBN1; RCN1; PNPLA2; SDC2; P4HB; QSOX1; CALU; HSP90B1; FSTL1; IGFBP3; SPP1; TNC; MXRA8; LGALS1; FGG; FGA	11167; 3371; 5034; 54587; 3486; 348; 5768; 813; 6696; 2266; 2200; 2243; 7184; 5954; 3956; 6383; 57104	110	109			PPAR signaling pathway - Homo sapiens (human)	8.81189e-05	0.00365093	KEGG	path:hsa03320	PCK2; HMGCS2; PCK1; ACOX2; PLIN2; CD36; FABP4; EHHADH; ADIPOQ; SLC27A2	5106; 3158; 9370; 1962; 948; 11001; 123; 5105; 8309; 2167	74	74
Phagosome - Homo sapiens (human)	1.18672e-06	5.86418e-05	KEGG	path:hsa04145	TCIRG1; NCF1; ITGB2; CORO1A; NCF4; MPO; CALR; M6PR; FCGR2B; THBS3; CYBB; TFRC; ITGAM; FCGR1A; C1R; TLR2; MSR1; SEC61B; NCF2; MBL2	1536; 653361; 4153; 10312; 4689; 7097; 3684; 3689; 2209; 2213; 10952; 715; 4353; 811; 7037; 4481; 11151; 7059; 4688; 4074	152	151			Propanoate metabolism	9.07868e-05	0.00365093	INOH	None	PCCB; ACAA2; ALDH6A1; ALDH7A1; EHHADH; ALDH1A1	501; 216; 10449; 4329; 1962; 5096	25	25
Integrin cell surface interactions	1.20027e-06	5.86418e-05	Reactome	R-HSA-216083	ITGAX; ITGB2; TNC; CD44; CD47; VTN; SPP1; ITGAM; FBN1; ICAM3; FGG; FGA; FGB	960; 7448; 961; 6696; 2266; 2243; 2200; 3385; 2244; 3371; 3689; 3684; 3687	67	67			Alanine Aspartate Asparagine metabolism	9.07868e-05	0.00365093	INOH	None	ASPA; AGXT2; DDO; ABAT; GPT; ASS1	2875; 443; 64902; 445; 18; 8528	25	25
lectin induced complement pathway	2.28086e-06	0.000107594	BioCarta	lectinpathway	C8B; C9; C8G; C7; C5; MBL2	730; 4153; 735; 732; 733; 727	12	12			Amino Acid metabolism	0.000111127	0.0043148	Wikipathways	WP3925	AOC3; PCK1; BHMT; AUH; HMGCS2; EHHADH; FTCD; ALDH7A1; DDC; ASS1; ALDH1A1	216; 549; 8639; 5105; 445; 1644; 3158; 501; 635; 10841; 1962	91	91
Dissolution of Fibrin Clot	4.09943e-06	0.000180904	Reactome	R-HSA-75205	ANXA2; PLG; SERPINB8; SERPINF2; S100A10; SERPINE1	302; 5345; 5054; 5340; 6281; 5271	13	13			Ketone body metabolism	0.000163484	0.00573996	Reactome	R-HSA-74182	ACAT1; HMGCS2; OXCT1; BDH2	5019; 38; 3158; 56898	10	10
RHO GTPases Activate NADPH Oxidases	4.09943e-06	0.000180904	Reactome	R-HSA-5668599	NCF2; NCF1; RAC2; NCF4; CYBB; NOX3	1536; 50508; 653361; 4688; 5880; 4689	13	13			Abacavir transport and metabolism	0.000163484	0.00573996	Reactome	R-HSA-2161522	ABCG2; PCK1; ADAL; SLC22A2	9429; 161823; 5105; 6582	10	10
AGE-RAGE pathway	6.30404e-06	0.000269498	Wikipathways	WP2324	MMP14; NCF1; CASP3; STAT1; PRKCB; EGFR; PRKCD; MAPK14; MMP9; LGALS3; IRAK4; MSR1	4323; 836; 51135; 5580; 5579; 3958; 4318; 653361; 1956; 1432; 6772; 4481	66	66			Synthesis and degradation of ketone bodies - Homo sapiens (human)	0.000163484	0.00573996	KEGG	path:hsa00072	ACAT1; HMGCS2; BDH2; OXCT1	56898; 38; 3158; 5019	10	10
IL5	1.06271e-05	0.000440542	NetPath	Pathway_IL5	IL5RA; STAT1; SYK; ALOX5; PRKCD; MAPK14; PTK2B; HCLS1; HCK; LYN	4067; 3568; 6772; 3055; 3059; 1432; 5580; 240; 6850; 2185	48	48			Pyruvate metabolism - Homo sapiens (human)	0.000168223	0.00573996	KEGG	path:hsa00620	PCK2; GRHPR; PCK1; ACAT1; ALDH7A1; LDHD; GLO1	197257; 9380; 38; 2739; 5105; 5106; 501	39	39
Common Pathway of Fibrin Clot Formation	1.17213e-05	0.000451146	Reactome	R-HSA-140875	F2; PROS1; PRTN3; F13A1; FGG; FGA; FGB	2147; 5657; 2266; 5627; 2162; 2244; 2243	22	22			Tryptophan degradation	0.000184487	0.00610977	INOH	None	QPRT; AOC3; AFMID; ACMSD; ACAT1; ALDH7A1; DDC; EHHADH; ALDH1A1	501; 1644; 216; 8639; 38; 23475; 125061; 1962; 130013	69	66
Dengue-2 Interactions with Blood Clotting Cascade	1.17213e-05	0.000451146	Wikipathways	WP3897	F2; FGA; PLG; SERPINF2; FGG; SERPINE1; FGB	5054; 2244; 2266; 2243; 5345; 5340; 2147	22	22			Tryptophan metabolism - Homo sapiens (human)	0.000198549	0.0063876	KEGG	path:hsa00380	AFMID; ACAT1; ALDH7A1; DDC; OGDHL; EHHADH; ACMSD	125061; 38; 1962; 55753; 130013; 1644; 501	40	40
Beta2 integrin cell surface interactions	1.18723e-05	0.000451146	PID	integrin2_pathway	ITGAX; ITGB2; ICAM3; ITGAM; TGFBI; FGG; FGA; FGB	3687; 2266; 3385; 2244; 3689; 2243; 3684; 7045	30	30			Peroxisomal lipid metabolism	0.000219284	0.00685873	Reactome	R-HSA-390918	PECR; ACOX2; HAO2; SLC27A2; EHHADH; PHYH	8309; 11001; 55825; 51179; 5264; 1962	29	29
Oxidative Damage	1.52099e-05	0.000562354	Wikipathways	WP3941	PCNA; CASP3; C1QC; C1QB; C1QA; C5AR1; C1S; C1R; C5	5111; 836; 714; 716; 715; 713; 712; 727; 728	40	40			Rap1 signaling pathway - Homo sapiens (human)	0.00022888	0.00689267	KEGG	path:hsa04015	ADCY5; IGF1R; TEK; FARP2; RAP1GAP; PLCB1; PIK3CA; VAV2; PRKCZ; ADCY9; AKT3; NGFR; RAPGEF2; CDH1; SIPA1L2; PRKD1; KDR	111; 115; 5909; 4804; 5290; 23236; 3791; 57568; 7410; 9855; 10000; 7010; 3480; 5587; 5590; 9693; 999	206	206
Blood Clotting Cascade	1.62983e-05	0.000586738	Wikipathways	WP272	F2; FGA; PLG; SERPINF2; FGG; SERPINE1; FGB	5054; 2244; 2266; 2243; 5345; 5340; 2147	23	23			PPAR signaling pathway	0.000232612	0.00689267	Wikipathways	WP3942	PCK2; HMGCS2; PCK1; ACOX2; CD36; FABP4; EHHADH; ADIPOQ; SLC27A2	8309; 1962; 9370; 3158; 5106; 5105; 11001; 948; 2167	68	68
alternative complement pathway	1.70776e-05	0.000593129	BioCarta	alternativepathway	C9; C7; C8B; C5; C8G	730; 735; 732; 733; 727	10	10			Creatine metabolism	0.000250644	0.00723655	Reactome	R-HSA-71288	GATM; GAMT; SLC6A12; CKB	1152; 2593; 2628; 6539	11	11
Regulation of TLR by endogenous ligand	1.73429e-05	0.000593129	Reactome	R-HSA-5686938	LBP; TLR2; S100A8; FGG; FGA; FGB	2243; 2266; 6279; 3929; 2244; 7097	16	16			Arginine Proline metabolism	0.000266672	0.00730449	INOH	None	AOC3; GAMT; CKB; GATM; ABAT; ALDH7A1; ASS1; ALDH1A1	2593; 216; 501; 8639; 1152; 2628; 445; 18	55	55
Leishmaniasis - Homo sapiens (human)	1.847e-05	0.000616266	KEGG	path:hsa05140	MAPK14; NCF1; ITGB2; STAT1; NCF4; NCF2; PRKCB; CYBB; ITGAM; FCGR1A; TLR2; IRAK4	1536; 1432; 2209; 653361; 51135; 5579; 4688; 4689; 7097; 3684; 3689; 6772	74	73			Glyoxylate and dicarboxylate metabolism - Homo sapiens (human)	0.000267028	0.00730449	KEGG	path:hsa00630	GRHPR; PCCB; AFMID; ACAT1; HAO2; SHMT1	125061; 9380; 38; 6470; 5096; 51179	30	30
TCR	2.11225e-05	0.00068799	NetPath	Pathway_TCR	EVL; LPXN; SKAP2; MAPK14; PTK2B; DEF6; STAT1; MPZL1; DOCK2; TFRC; ZAP70; LYN; ANXA2; CARD11; PRKCD; ADA; LCP2; INPP5D; VAV1; G6PD; SYK; PTPRC; STK39; LCK	4067; 6772; 5580; 100; 9404; 2185; 50619; 8935; 3932; 7037; 1794; 5788; 3635; 302; 9019; 2539; 7535; 3937; 84433; 27347; 1432; 51466; 7409; 6850	245	244			Synthesis and Degradation of Ketone Bodies	0.000280656	0.00730449	Wikipathways	WP311	ACAT1; HMGCS2; OXCT1	5019; 38; 3158	5	5
NOD-like receptor signaling pathway - Homo sapiens (human)	2.23831e-05	0.000712095	KEGG	path:hsa04621	IL18; MAPK14; CASP4; STAT2; STAT1; CASP1; PRKCD; NAIP; CARD9; GBP5; NAMPT; CYBB; OAS2; ATG12; TBK1; RBCK1; PYCARD; IFI16; IRAK4	1536; 3606; 9140; 6772; 6773; 64170; 10616; 834; 3428; 10135; 1432; 837; 29108; 29110; 51135; 4939; 5580; 115362; 4671	168	168			ketolysis	0.000280656	0.00730449	HumanCyc	PWY66-368	ACAT1; OXCT1; BDH2	5019; 38; 56898	5	5
N-Glycan biosynthesis	2.31722e-05	0.000720446	EHMN	N-Glycan biosynthesis	ALG3; MAN2A2; MGAT1; MGAT2; B4GALT1; STT3B; STT3A; DAD1; FUT8	4122; 2530; 4245; 3703; 201595; 2683; 4247; 1603; 10195	42	42			Drug metabolism - cytochrome P450 - Homo sapiens (human)	0.000290721	0.00730449	KEGG	path:hsa00982	UGT2B7; UGT2B4; FMO1; ADH6; GSTT1; GSTM3; UGT2A3; GSTA1; GSTA3	2947; 2952; 130; 2326; 79799; 7363; 7364; 2938; 2940	72	70
CXCR4-mediated signaling events	2.4114e-05	0.000733065	PID	cxcr4_pathway	INPP5D; STAT2; STAT1; VAV1; CSK; PTK2B; PTPRC; GNA13; ARRB2; MMP9; HCK; LYN; LCK	4067; 6773; 2185; 3932; 6772; 3055; 4318; 10672; 5788; 1445; 3635; 409; 7409	87	87			Urea cycle and metabolism of amino groups	0.00029192	0.00730449	Wikipathways	WP497	GATM; GAMT; ASS1; ACY1; CKB	2593; 445; 1152; 95; 2628	20	20
RUNX1 regulates transcription of genes involved in differentiation of myeloid cells	2.96077e-05	0.000880506	Reactome	R-HSA-8939246	LGALS3; CBFB; RUNX1; PRKCB	865; 5579; 3958; 861	7	6			beta-Alanine metabolism - Homo sapiens (human)	0.00032257	0.00789596	KEGG	path:hsa00410	AOC3; DPYS; ALDH6A1; ABAT; ALDH7A1; EHHADH	1807; 18; 1962; 8639; 4329; 501	31	31
Beta3 integrin cell surface interactions	3.44221e-05	0.0010019	PID	integrin3_pathway	VTN; CD47; FBN1; SPP1; TNC; TGFBI; FGG; FGA; FGB	2266; 961; 7045; 6696; 7448; 2200; 2244; 3371; 2243	44	44			Lysine catabolism	0.000366815	0.00858264	Reactome	R-HSA-71064	AASS; CRYM; PIPOX; ALDH7A1	1428; 501; 10157; 51268	12	12
Prion diseases - Homo sapiens (human)	4.03477e-05	0.00114991	KEGG	path:hsa05020	C9; C1QC; C1QB; C1QA; C8B; C8G; C7; C5	712; 713; 714; 727; 730; 732; 733; 735	35	35			Alanine and aspartate metabolism	0.000366815	0.00858264	Wikipathways	WP106	GPT; ASS1; ASPA; ABAT	2875; 443; 18; 445	12	12
Thromboxane A2 receptor signaling	4.39885e-05	0.00122809	PID	txa2pathway	SYK; PRKCB; EGFR; PRKCD; MAPK14; ARRB2; GNA13; HCK; LYN; LCK	4067; 3055; 409; 1956; 1432; 10672; 5580; 3932; 5579; 6850	57	56			Fructose and mannose metabolism	0.00037349	0.00858264	EHMN	Fructose and mannose metabolism	SLC5A12; SLC5A1; SLC5A10; ALDOB; SLC2A8	159963; 6523; 229; 125206; 29988	21	21
TCR signaling in na&#xef;ve CD4+ T cells	4.79437e-05	0.00131174	PID	tcr_pathway	STIM1; INPP5D; CSK; VAV1; CARD11; PRKCB; PTPRC; ZAP70; LCP2; STK39; LCK	27347; 1445; 3932; 7535; 6786; 3937; 84433; 5788; 3635; 7409; 5579	68	68			Urea cycle and metabolism of arginine, proline, glutamate, aspartate and asparagine	0.000397603	0.00895401	EHMN	Urea cycle and metabolism of arginine, proline, glutamate, aspartate and asparagine	AOC3; L2HGDH; ALDH7A1; GSTZ1; GATM; DDO; ABAT; AGMAT; SLC6A13; SLC6A12; ACY1	79944; 8528; 8639; 501; 79814; 95; 6539; 2628; 2954; 6540; 18	106	105
Protein processing in endoplasmic reticulum - Homo sapiens (human)	5.91884e-05	0.00157211	KEGG	path:hsa04141	UBE2J1; SEC24D; TXNDC5; CALR; PDIA4; HSP90B1; SEC61B; SSR1; DERL2; SSR3; LMAN1; EDEM3; DNAJC5; STT3B; STT3A; SEC63; DAD1; P4HB	7184; 1603; 6745; 6747; 3703; 9871; 81567; 10952; 9601; 811; 11231; 51009; 51465; 201595; 80267; 3998; 5034; 80331	165	165			Lysine degradation - Homo sapiens (human)	0.000436106	0.00962855	KEGG	path:hsa00310	KMT2A; PIPOX; AASS; BBOX1; ACAT1; ALDH7A1; OGDHL; EHHADH	38; 1962; 10157; 4297; 51268; 55753; 8424; 501	59	59
IL6-mediated signaling events	5.97586e-05	0.00157211	PID	il6_7pathway	LBP; CRP; STAT1; VAV1; PRKCD; HSP90B1; MAPK14; HCK; FGG	1401; 3055; 7184; 6772; 2266; 1432; 5580; 3929; 7409	47	47			glutathione-mediated detoxification	0.000471168	0.0102026	HumanCyc	PWY-4061	GSTM3; GSTZ1; GSTA1; GSTT1; GSTA3	2952; 2947; 2940; 2954; 2938	22	22
SRP-dependent cotranslational protein targeting to membrane	6.80306e-05	0.00175596	Reactome	R-HSA-1799339	RPS26; RPS25; SRPRB; SPCS2; RPS27L; RPL7; RPLP1; RPS18; SSR1; SSR3; RPL12; RPL38; SEC61B; RPS19; SPCS1	6745; 9789; 6176; 6230; 6223; 51065; 6136; 58477; 6129; 6747; 6222; 6169; 6231; 28972; 10952	124	123			lysine degradation II (pipecolate pathway)	0.00054842	0.0112277	HumanCyc	PWY66-425	CRYM; PIPOX; ALDH7A1	1428; 501; 51268	6	6
extrinsic prothrombin activation pathway	7.92726e-05	0.00200824	BioCarta	extrinsicpathway	F2; FGG; PROS1; FGA; FGB	2243; 2266; 2147; 2244; 5627	13	13			Alpha-oxidation of phytanate	0.00054842	0.0112277	Reactome	R-HSA-389599	PECR; PHYH; SLC27A2	11001; 5264; 55825	6	6
N-Glycan biosynthesis - Homo sapiens (human)	8.41905e-05	0.00209405	KEGG	path:hsa00510	ALG3; MAN2A2; MGAT1; MGAT2; B4GALT1; STT3B; STT3A; DAD1; FUT8	4247; 4245; 4122; 1603; 10195; 2530; 2683; 3703; 201595	49	49			Conjugation of benzoate with glycine	0.00054842	0.0112277	Reactome	R-HSA-177135	GLYATL1; GLYAT; ACSM2B	92292; 348158; 10249	6	6
B Cell Receptor Signaling Pathway	8.6415e-05	0.00211099	Wikipathways	WP23	INPP5D; SYK; CARD11; PRKCB; PRKCD; MAPK14; VAV1; PTPRC; REL; HCLS1; RAC2; LYN; LCK	5580; 6850; 5966; 1432; 5579; 84433; 4067; 5788; 7409; 3635; 5880; 3059; 3932	98	98			Branched-chain amino acid catabolism	0.000586899	0.0118009	Reactome	R-HSA-70895	AUH; ALDH6A1; BBOX1; SHMT1; ACAT1	6470; 549; 4329; 38; 8424	23	23
BCR	0.000117659	0.0028175	NetPath	Pathway_BCR	STAT1; VAV1; CARD11; PRKCB; FCGR2B; PRKCD; MAPK14; SYK; PTK2B; ZAP70; LCP2; HCLS1; HCK; LYN; LCK	4067; 3059; 1432; 5580; 2185; 3932; 6772; 3055; 5579; 7535; 3937; 84433; 2213; 7409; 6850	129	129			Alanine, aspartate and glutamate metabolism - Homo sapiens (human)	0.000640607	0.0126548	KEGG	path:hsa00250	ASPA; AGXT2; DDO; ABAT; GPT; ASS1	64902; 18; 443; 445; 8528; 2875	35	35
Atypical NF-kappaB pathway	0.000119456	0.0028175	PID	nfkappabatypicalpathway	MAPK14; SYK; ARRB2; LCK; REL	5966; 1432; 409; 3932; 6850	14	14			Metabolism of lipids	0.000657887	0.0127721	Reactome	R-HSA-556833	EPHX2; UGT8; PECR; ACOX2; FABP4; PCCB; AKR1C1; LPIN2; ACAA2; CBR4; DDHD2; INPP4B; EHHADH; ACAT1; SPTLC3; PNPLA4; SLC27A2; HSD11B2; HMGCS2; SLC44A3; PLA2G4C; BDH2; PHYH; LRP2; GBA3; FAAH; INPP5F; PTPN13; CDS1; ACOT2; SLC22A5; GDPD1; OXCT1; PIK3CA; HAO2; PRKD1	5783; 5096; 2053; 51179; 8605; 1645; 8228; 2166; 7368; 284161; 84869; 3158; 23259; 1040; 38; 56898; 4036; 55304; 6584; 8309; 55825; 5264; 10449; 126969; 9663; 3291; 1962; 11001; 22876; 2167; 5290; 8821; 5587; 5019; 10965; 57733	664	659
Cross-presentation of particulate exogenous antigens (phagosomes)	0.000129947	0.00301302	Reactome	R-HSA-1236973	CYBB; NCF2; NCF1; NCF4	1536; 653361; 4688; 4689	8	8			Valine, leucine and isoleucine degradation	0.000720291	0.0137466	EHMN	Valine, leucine and isoleucine degradation	PCCB; AUH; ACAA2; ALDH6A1; ABAT; ALDH7A1; EHHADH	501; 549; 10449; 4329; 18; 1962; 5096	49	49
Metabolic reprogramming in colon cancer	0.000159977	0.00364748	Wikipathways	WP4290	PGD; HK3; SLC16A3; G6PD; PSAT1; PYCR2; SLC1A5; PYCR1	29968; 6510; 3101; 5226; 5831; 2539; 9123; 29920	42	42			Saturated fatty acids beta-oxidation	0.000880686	0.0162566	EHMN	Saturated fatty acids beta-oxidation	ACOX2; ACAA2; PECR; EHHADH; ACAT1	8309; 55825; 10449; 38; 1962	25	25
Alpha-synuclein signaling	0.00016603	0.00372342	PID	alphasynuclein_pathway	SYK; PRKCD; PTK2B; HCK; LYN; UCHL1; LCK	4067; 3932; 3055; 7345; 5580; 6850; 2185	32	32			gluconeogenesis	0.000880686	0.0162566	HumanCyc	PWY66-399	PCK2; PCK1; ALDOB; FBP1; G6PC3	92579; 5106; 229; 2203; 5105	26	25
Protein export - Homo sapiens (human)	0.000174028	0.00383985	KEGG	path:hsa03060	SRPRB; SPCS1; SPCS2; OXA1L; SEC63; SEC61B	5018; 28972; 10952; 9789; 11231; 58477	23	23			Neurotransmitter release cycle	0.000920691	0.0162922	Reactome	R-HSA-112310	LIN7A; ABAT; STXBP1; UNC13B; SLC22A2; SLC6A13; SLC6A12	8825; 6582; 6540; 6539; 6812; 10497; 18	51	51
Interferon type I signaling pathways	0.000183985	0.00395945	Wikipathways	WP585	STAT2; STAT1; VAV1; PIK3CD; MAPK14; PTPRC; ZAP70; REL; LCK	5293; 6772; 5788; 5966; 3932; 7535; 1432; 6773; 7409	54	54			Transcriptional regulation of white adipocyte differentiation	0.000939584	0.0162922	Wikipathways	WP2751	FABP4; PCK1; ADIPOQ; CD36	948; 9370; 2167; 5105	15	15
Beta1 integrin cell surface interactions	0.000185238	0.00395945	PID	integrin1_pathway	VTN; IGSF8; FBN1; SPP1; TNC; F13A1; TGFBI; FGG; FGA; FGB	3371; 7448; 6696; 7045; 2266; 2200; 2162; 2244; 2243; 93185	66	66			&beta;-alanine degradation	0.00095496	0.0162922	HumanCyc	BETA-ALA-DEGRADATION-I-PWY	ALDH6A1; ABAT	18; 4329	2	2
GPVI-mediated activation cascade	0.000203876	0.0042908	Reactome	R-HSA-114604	RAC2; SYK; VAV1; LCP2; LYN; RHOG; LCK	4067; 3932; 5880; 391; 6850; 3937; 7409	33	33			creatine biosynthesis	0.00095496	0.0162922	HumanCyc	GLYCGREAT-PWY	GATM; GAMT	2628; 2593	2	2
Fc epsilon RI signaling pathway - Homo sapiens (human)	0.000210438	0.00436181	KEGG	path:hsa04664	INPP5D; SYK; ALOX5; PIK3CD; MAPK14; VAV1; ALOX5AP; LCP2; LYN; RAC2	1432; 241; 5293; 3635; 6850; 3937; 4067; 240; 7409; 5880	68	67			choline degradation	0.00095496	0.0162922	HumanCyc	CHOLINE-BETAINE-ANA-PWY	CHDH; ALDH7A1	55349; 501	2	2
TCR signaling in na&#xef;ve CD8+ T cells	0.000244966	0.0050017	PID	cd8tcrpathway	STIM1; CSK; VAV1; CARD11; PRKCB; PTPRC; ZAP70; LCP2; LCK	1445; 3932; 7535; 6786; 3937; 84433; 5788; 7409; 5579	56	56			Retinol metabolism - Homo sapiens (human)	0.00103479	0.0171568	KEGG	path:hsa00830	UGT2B7; UGT2B4; ADH6; UGT2A3; DHRS3; PNPLA4; ALDH1A1; RETSAT	130; 9249; 8228; 79799; 7363; 7364; 216; 54884	67	67
Leukocyte transendothelial migration - Homo sapiens (human)	0.000336344	0.00676645	KEGG	path:hsa04670	NCF2; NCF1; ITGB2; RAC2; NCF4; VAV1; PRKCB; PIK3CD; CYBB; PTK2B; ITGAM; MMP9; MAPK14	1536; 653361; 4688; 4689; 2185; 3684; 3689; 5293; 4318; 7409; 5880; 1432; 5579	112	112			One carbon metabolism and related pathways	0.00103611	0.0171568	Wikipathways	WP3940	BHMT; AGXT2; SARDH; BHMT2; DMGDH; CHDH; SHMT1	6470; 55349; 1757; 23743; 635; 29958; 64902	52	52
Osteoclast differentiation - Homo sapiens (human)	0.000345052	0.00684103	KEGG	path:hsa04380	NCF2; NCF1; STAT2; STAT1; NCF4; SYK; FCGR2B; PIK3CD; FHL2; CYLD; FCGR1A; LCP2; LCK; MAPK14	1540; 653361; 4688; 4689; 6772; 6773; 2209; 5293; 6850; 2274; 3932; 3937; 1432; 2213	128	127			Phytanic acid peroxisomal oxidation	0.00122241	0.0197257	EHMN	Phytanic acid peroxisomal oxidation	ACOX2; PHYH; EHHADH; SLC27A2	8309; 11001; 5264; 1962	16	16
Validated transcriptional targets of deltaNp63 isoforms	0.000360542	0.00704602	PID	deltanp63pathway	RUNX1; RRAD; SEC14L2; SFN; IGFBP3; KRT14; KRT5; ADA	23541; 3486; 6236; 3861; 3852; 2810; 861; 100	48	47			AMPK signaling pathway - Homo sapiens (human)	0.00122629	0.0197257	KEGG	path:hsa04152	PCK2; IGF1R; PCK1; PIK3CA; CD36; G6PC3; AKT3; FBP1; TSC2; ADIPOQ; TSC1	3480; 7248; 7249; 9370; 2203; 5290; 10000; 92579; 948; 5105; 5106	120	120
Regulation of toll-like receptor signaling pathway	0.000369007	0.00710989	Wikipathways	WP1449	LBP; STAT1; TRAFD1; IRF5; TBK1; SYK; SPP1; PIK3CD; CD40; MAPK14; CYLD; RBCK1; TLR2; IRAK4; MBL2	3929; 1540; 29110; 10616; 6850; 3663; 1432; 6772; 10906; 7097; 51135; 6696; 5293; 958; 4153	143	143			Fluid shear stress and atherosclerosis - Homo sapiens (human)	0.00126403	0.0198905	KEGG	path:hsa05418	PRKCZ; GSTT1; PIK3CA; GSTM3; GSTA1; GSTA3; AKT3; TRPV4; MAPK8; PLAT; ASS1; KDR	3791; 10000; 5599; 5327; 2938; 2940; 2947; 2952; 445; 59341; 5590; 5290	139	139
Platelet Aggregation (Plug Formation)	0.000430545	0.00818036	Reactome	R-HSA-76009	F2; APBB1IP; CSK; SYK; FGG; FGA; FGB	2147; 1445; 2266; 2244; 54518; 2243; 6850	37	37			Ascorbate and aldarate metabolism - Homo sapiens (human)	0.00127186	0.0198905	KEGG	path:hsa00053	UGT2B7; UGT2B4; UGT2A3; RGN; ALDH7A1	9104; 79799; 7363; 7364; 501	27	27
Integrin alphaIIb beta3 signaling	0.000448172	0.00821429	Reactome	R-HSA-354192	APBB1IP; CSK; SYK; FGG; FGA; FGB	1445; 2266; 2244; 54518; 2243; 6850	27	27			ketogenesis	0.00146601	0.0223071	HumanCyc	PWY66-367	ACAT1; HMGCS2; BDH2	38; 3158; 56898	8	8
Integrin signaling	0.000448172	0.00821429	Reactome	R-HSA-9006921	APBB1IP; CSK; SYK; FGG; FGA; FGB	1445; 2266; 2244; 54518; 2243; 6850	27	27			Synthesis of Ketone Bodies	0.00146601	0.0223071	Reactome	R-HSA-77111	ACAT1; HMGCS2; BDH2	38; 3158; 56898	8	8
Regulation of signaling by CBL	0.000450345	0.00821429	Reactome	R-HSA-912631	VAV1; SYK; LYN; PIK3CD; HCK	4067; 5293; 7409; 6850; 3055	18	18			Inositol phosphate metabolism	0.001518	0.0225133	INOH	None	PLCB1; INPP5A; PIK3CA; INPP4B; IMPA2; PLCD1	8821; 3613; 23236; 3632; 5333; 5290	41	41
Tuberculosis - Homo sapiens (human)	0.000467623	0.00841722	KEGG	path:hsa05152	IL18; ITGAX; ITGB2; CASP3; STAT1; LBP; SYK; LSP1; IRAK4; FCGR2B; TCIRG1; CARD9; CORO1A; ITGAM; FCGR1A; TLR2; MAPK14	3606; 3684; 3687; 3689; 6772; 2209; 10312; 64170; 6850; 2213; 836; 3929; 11151; 1432; 7097; 51135; 4046	179	178			NRF2 pathway	0.00151955	0.0225133	Wikipathways	WP2884	UGT2B7; GSTM3; GSTT1; TGFBR2; SLC2A8; GSTA1; GSTA3; SLC5A12; SLC5A1; SLC5A10; SLC6A13; SLC6A19	7364; 159963; 29988; 7048; 125206; 2938; 6523; 2952; 2947; 2940; 6540; 340024	142	142
Antigen processing-Cross presentation	0.000483649	0.00859262	Reactome	R-HSA-1236975	TLR2; NCF1; NCF4; CALR; CYBB; FCGR1A; SEC61B; NCF2	1536; 653361; 2209; 4689; 811; 7097; 10952; 4688	49	49			Butanoate metabolism	0.00155983	0.02281	INOH	None	EHHADH; ACAT1; HMGCS2; OXCT1	5019; 38; 1962; 3158	17	17
Interleukin-2 family signaling	0.000510649	0.00888027	Reactome	R-HSA-451927	IL5RA; INPP5D; SYK; PIK3CD; PTK2B; LGALS9; LCK	3568; 3932; 3965; 5293; 3635; 6850; 2185	38	38			Insulin resistance - Homo sapiens (human)	0.00174743	0.0252258	KEGG	path:hsa04931	PCK2; PCK1; PIK3CA; TBC1D4; CD36; AKT3; G6PC3; MAPK8; PRKCZ; SLC27A2	9882; 5290; 10000; 5599; 92579; 948; 5590; 11001; 5105; 5106	107	107
Systemic lupus erythematosus - Homo sapiens (human)	0.000512823	0.00888027	KEGG	path:hsa05322	HIST2H2AB; C9; C1QC; C1QB; C1QA; CTSG; C8B; FCGR1A; C8G; C1S; C1R; CD40; C7; C5	712; 713; 714; 715; 716; 727; 730; 732; 733; 735; 2209; 317772; 1511; 958	133	132			Vitamin A and Carotenoid Metabolism	0.00195404	0.0275032	Wikipathways	WP716	RETSAT; DHRS3; CD36; RBP4; RBP7; ALDH1A1	216; 9249; 54884; 116362; 5950; 948	43	43
IL2	0.000596283	0.0101702	NetPath	Pathway_IL2	NR3C1; STAT1; VAV1; PIK3CD; MAPK14; SYK; PTK2B; LYN; YBX1; LCK	4067; 6772; 5293; 1432; 2908; 4904; 3932; 7409; 6850; 2185	76	76			superpathway of tryptophan utilization	0.00195404	0.0275032	HumanCyc	PWY66-401	QPRT; ADH6; AFMID; DDC; CYP4X1; ACMSD	1644; 260293; 130; 23475; 125061; 130013	45	43
Formation of Fibrin Clot (Clotting Cascade)	0.000602182	0.0101702	Reactome	R-HSA-140877	F2; PROS1; FGB; F13A1; FGG; FGA; PRTN3	2147; 2244; 5657; 2266; 5627; 2162; 2243	39	39			Inositol phosphate metabolism - Homo sapiens (human)	0.00198255	0.0275599	KEGG	path:hsa00562	ALDH6A1; PLCB1; INPP5F; INPP5A; PIK3CA; INPP4B; IMPA2; PLCD1	3613; 5290; 3632; 23236; 5333; 22876; 8821; 4329	74	74
miR-targeted genes in muscle cell - TarBase	0.000715654	0.0119392	Wikipathways	WP2005	SLC4A10; UBE2J1; ACP2; EGFR; P4HA2; MAGT1; BET1; SRPRB; MPZL1; FSTL1; CBFB; PTBP2; FNDC3B; CDCP1; NCEH1; HMGA1; CPOX; TMED3; GALNT7; RHOG; GALNT1; TMEM87A; MAPK14; G6PD; TNFAIP2; PSAT1; PTPRF; GNA13; PTPRJ	64778; 7127; 5795; 5792; 29968; 51809; 11167; 2539; 1371; 10282; 1956; 8974; 391; 9019; 3159; 1432; 865; 84061; 58155; 58477; 2589; 23423; 64866; 57282; 53; 25963; 57552; 10672; 51465	400	400			IGF1 pathway	0.00208062	0.0278902	PID	igf1_pathway	GRB10; IGF1R; PRKCZ; PRKD1; PIK3CA	5590; 3480; 5587; 2887; 5290	30	30
Cytokine Signaling in Immune system	0.000726482	0.0119738	Reactome	R-HSA-1280215	MAPK14; PTK2B; FCGR1A; S100B; STAT2; STAT1; MAP3K3; PIK3CD; OAS2; PML; LYN; IRAK4; IL5RA; CD44; P4HB; PRKCD; TXLNA; CD40; LGALS9; GBP5; HCK; IL18; EIF4E3; INPP5D; CASP3; IRF5; CASP1; VAV1; SYK; PRTN3; ISG20; LCK	5371; 2185; 115362; 834; 5034; 2209; 960; 1432; 5293; 3965; 6772; 3055; 3932; 5657; 3606; 7409; 51135; 317649; 5580; 3663; 200081; 958; 3635; 4215; 3568; 836; 6850; 4067; 6773; 6285; 3669; 4939	458	458			Regulation of CDC42 activity	0.00208062	0.0278902	PID	cdc42_reg_pathway	FARP2; DOCK6; VAV2; DNMBP; MCF2L	23268; 23263; 7410; 9855; 57572	30	30
Signaling by Interleukins	0.000745477	0.0121406	Reactome	R-HSA-449147	IL18; IL5RA; INPP5D; CASP3; STAT1; CASP1; VAV1; MAP3K3; P4HB; PIK3CD; LGALS9; TXLNA; MAPK14; SYK; PTK2B; PRTN3; HCK; LYN; LCK; IRAK4; S100B	4067; 6285; 51135; 3965; 2185; 200081; 6772; 5034; 3932; 5657; 4215; 3606; 834; 3568; 3635; 5293; 1432; 836; 3055; 7409; 6850	254	254			Amine compound SLC transporters	0.00208062	0.0278902	Reactome	R-HSA-425428	SLC6A13; SLC6A12; SLC6A19; SLC44A3; SLC22A2	126969; 6582; 6540; 6539; 340024	30	30
Nucleotide-binding Oligomerization Domain (NOD) pathway	0.000824112	0.0132313	Wikipathways	WP1433	IL18; CASP1; NAIP; ACAP1; CARD9; AAMP; PYCARD	3606; 834; 4671; 64170; 9744; 14; 29108	41	41			Erythrocytes take up oxygen and release carbon dioxide	0.00214874	0.0284645	Reactome	R-HSA-1247673	CA1; SLC4A1; CA4	762; 6521; 759	9	9
Peptide hormone metabolism	0.000831791	0.0132313	Reactome	R-HSA-2980736	SPCS1; SPCS2; CPB2; CTSG; CTSZ; INHBC; SLC30A7; SLC30A6	1361; 1511; 148867; 55676; 28972; 1522; 9789; 3626	53	53			NRAGE signals death through JNK	0.00219593	0.0287513	Reactome	R-HSA-193648	ARHGEF37; ARHGEF15; VAV2; MCF2L; NGFR; MAPK8; ARHGEF40	55701; 5599; 22899; 7410; 4804; 389337; 23263	61	59
Legionellosis - Homo sapiens (human)	0.00106901	0.0168093	KEGG	path:hsa05134	IL18; ITGB2; CASP3; CASP1; NAIP; TLR2; ITGAM; PYCARD	3606; 29108; 7097; 834; 836; 3684; 3689; 4671	55	55			Na+/Cl- dependent neurotransmitter transporters	0.00241896	0.0306039	Reactome	R-HSA-442660	SLC6A13; SLC6A12; SLC6A19; SLC22A2	6540; 340024; 6539; 6582	19	19
Brain-Derived Neurotrophic Factor (BDNF) signaling pathway	0.00121656	0.018912	Wikipathways	WP2380	NCF2; NCF1; CASP3; STAT1; YBX1; PRKCD; MAPK14; PTPRF; PTK2B; MARCKS; SPP1; RAB3A; RHOG; EIF2S2	4904; 391; 5580; 6772; 653361; 2185; 5864; 4688; 5792; 6696; 4082; 8894; 1432; 836	144	144			GABA synthesis, release, reuptake and degradation	0.00241896	0.0306039	Reactome	R-HSA-888590	STXBP1; SLC6A13; ABAT; SLC6A12	6812; 18; 6540; 6539	19	19
Interleukin-3, 5 and GM-CSF signaling	0.0012728	0.019564	Reactome	R-HSA-512988	IL5RA; INPP5D; VAV1; PIK3CD; SYK; HCK; LYN	4067; 3568; 5293; 3055; 3635; 7409; 6850	44	44			fatty acid &beta;-oxidation (peroxisome)	0.00241896	0.0306039	HumanCyc	PWY66-391	ACOX2; ACAA2; EHHADH; SLC27A2	8309; 11001; 1962; 10449	19	19
B cell receptor signaling pathway - Homo sapiens (human)	0.00131185	0.0199401	KEGG	path:hsa04662	INPP5D; SYK; FCGR2B; CARD11; PRKCB; PIK3CD; VAV1; RAC2; LYN	2213; 5293; 3635; 6850; 5579; 84433; 4067; 7409; 5880	71	70			Propanoate metabolism - Homo sapiens (human)	0.00279498	0.0333959	KEGG	path:hsa00640	PCCB; ACAT1; ALDH6A1; EHHADH; ABAT	18; 38; 1962; 5096; 4329	32	32
Inflammatory Response Pathway	0.00138115	0.0206574	Wikipathways	WP453	THBS3; IL5RA; CD40; VTN; ZAP70; LCK	958; 7059; 7535; 3932; 7448; 3568	33	33			methionine salvage	0.00280607	0.0333959	HumanCyc	ADENOSYLHOMOCYSCAT-PWY	BHMT2; BHMT	635; 23743	3	3
Asparagine N-linked glycosylation	0.00138924	0.0206574	Reactome	R-HSA-446203	DYNLL1; ALG3; GORASP1; MAGT1; PMM2; DAD1; BET1; TMED3; TMED9; DERL2; B4GALT1; MAN2A2; MGAT1; MGAT2; LMAN1; STT3A; SEC24D; CALR; TRAPPC5; CTSZ; NEU1; FUT8	54732; 10282; 10195; 5373; 2530; 3703; 2683; 1522; 811; 4758; 8655; 4122; 3998; 4245; 64689; 23423; 84061; 4247; 9871; 126003; 1603; 51009	286	285			methylglyoxal degradation I	0.00280607	0.0333959	HumanCyc	PWY-5386	LDHD; GLO1	2739; 197257	3	3
Signaling by VEGF	0.00147989	0.0216819	Reactome	R-HSA-194138	CYBB; NCF1; NCKAP1L; NCF4; VAV1; PRKCB; PRKCD; MAPK14; PTK2B; NCF2; NRP2	1432; 8828; 5580; 2185; 1536; 3071; 4689; 4688; 5579; 653361; 7409	100	100			Inhibition of TSC complex formation by PKB	0.00280607	0.0333959	Reactome	R-HSA-165181	TSC2; TSC1	7248; 7249	3	3
Vesicle-mediated transport	0.00148984	0.0216819	Reactome	R-HSA-5653656	FNBP1; DYNLL1; RAB4A; GORASP1; EGFR; HSP90B1; ARRB2; DNM3; TXNDC5; MSR1; CTSZ; ACBD3; BET1; APOE; TMED3; KIF2A; TBC1D2; TMED9; TFRC; YIPF6; HP; KIF21B; MAN2A2; SEC24D; GOLIM4; LMAN1; RAB3A; COPS7B; GALNT1; GALNT2; CD163; TRAPPC5; AAK1; RIN3; SFN; M6PR; CALR; CHMP4B; AGFG1	10282; 128866; 23046; 26052; 126003; 4481; 2590; 7184; 811; 2810; 64689; 3267; 409; 5867; 64708; 54732; 3796; 9332; 2589; 3240; 81567; 8655; 348; 9871; 23048; 27333; 4074; 7037; 1956; 22848; 55357; 3998; 64746; 1522; 286451; 4122; 23423; 5864; 79890	620	620			Interconversion of 2-oxoglutarate and 2-hydroxyglutarate	0.00280607	0.0333959	Reactome	R-HSA-880009	L2HGDH; ADHFE1	137872; 79944	3	3
intrinsic prothrombin activation pathway	0.0015104	0.0217497	BioCarta	intrinsicpathway	F2; FGG; PROS1; FGA; FGB	2147; 2266; 5627; 2244; 2243	23	23			The citric acid (TCA) cycle and respiratory electron transport	0.0028176	0.0333959	Reactome	R-HSA-1428517	NDUFA7; L2HGDH; NDUFB9; MPC1; ATP5S; GSTZ1; NUBPL; UQCRQ; FAHD1; ADHFE1; COX8A; GLO1; COX6C	137872; 27109; 79944; 51660; 1351; 2739; 4715; 81889; 2954; 27089; 4701; 1345; 80224	173	173
Warfarin Pathway, Pharmacodynamics	0.00154736	0.0220499	PharmGKB	PA145011114	PROS1; F2; VKORC1; CALU	2147; 813; 79001; 5627	14	14			Zidovudine Pathway, Pharmacokinetics/Pharmacodynamics	0.00295072	0.0346094	PharmGKB	PA165859361	UGT2B7; ABCG2; SLC28A1; SLC22A11	55867; 9154; 9429; 7364	20	20
TCR signaling	0.00160534	0.0224392	Reactome	R-HSA-202403	EVL; CSK; CARD11; LCK; PTPRC; ZAP70; LCP2; INPP5D; PTPRJ	51466; 1445; 3932; 7535; 5795; 84433; 5788; 3635; 3937	72	72			Drug metabolism - other enzymes - Homo sapiens (human)	0.00300289	0.0348583	KEGG	path:hsa00983	UGT2B7; UGT2B4; GSTT1; GSTM3; UGT2A3; GSTA1; GSTA3; DPYS	2952; 1807; 2947; 79799; 7363; 7364; 2938; 2940	79	79
Signaling by high-kinase activity BRAF mutants	0.00162389	0.0224392	Reactome	R-HSA-6802948	APBB1IP; CSK; ARRB2; FGG; FGA; FGB	1445; 54518; 409; 2266; 2244; 2243	34	34			Tyrosine metabolism	0.00321185	0.0369035	INOH	None	DDC; AOC3; GSTZ1; ADHFE1; ADH6	1644; 8639; 137872; 130; 2954	33	33
IL8- and CXCR2-mediated signaling events	0.00162389	0.0224392	PID	il8cxcr2_pathway	RAC2; DOCK2; PRKCB; ARRB2; HCK; LYN	4067; 3055; 5880; 409; 1794; 5579	34	34			Insulin signaling pathway - Homo sapiens (human)	0.00351135	0.039003	KEGG	path:hsa04910	PCK2; PCK1; PIK3CA; G6PC3; AKT3; FBP1; PRKAR2B; MAPK8; TSC2; PRKCZ; TSC1	7248; 7249; 2203; 5290; 10000; 92579; 5577; 5590; 5599; 5105; 5106	137	137
C-type lectin receptor signaling pathway - Homo sapiens (human)	0.0020337	0.0274527	KEGG	path:hsa04625	STAT2; STAT1; CASP1; SYK; LSP1; PIK3CD; PRKCD; MAPK14; CARD9; CYLD; PYCARD	1540; 6772; 6773; 64170; 5293; 6850; 834; 1432; 29108; 5580; 4046	104	104			AGE-RAGE signaling pathway in diabetic complications - Homo sapiens (human)	0.0035307	0.039003	KEGG	path:hsa04933	NFATC1; PRKCZ; PLCB1; PIK3CA; AKT3; COL4A1; PLCD1; MAPK8; TGFBR2	4772; 5290; 23236; 5333; 1282; 10000; 7048; 5590; 5599	99	99
GRB2:SOS provides linkage to MAPK signaling for Integrins	0.00204691	0.0274527	Reactome	R-HSA-354194	FGG; APBB1IP; FGA; FGB	2243; 2266; 2244; 54518	15	15			Choline metabolism in cancer - Homo sapiens (human)	0.0035307	0.039003	KEGG	path:hsa05231	SLC44A3; PIK3CA; SLC22A5; AKT3; SLC22A2; PLA2G4C; MAPK8; TSC2; TSC1	6582; 7248; 7249; 5290; 10000; 8605; 6584; 5599; 126969	99	99
p130Cas linkage to MAPK signaling for integrins	0.00204691	0.0274527	Reactome	R-HSA-372708	FGG; APBB1IP; FGA; FGB	2243; 2266; 2244; 54518	15	15			Valproic Acid Pathway, Pharmacokinetics	0.00355712	0.039003	PharmGKB	PA165964265	UGT2B7; ACSM5; ACSM2A; ACSM2B	54988; 7364; 123876; 348158	21	21
Signaling by RAS mutants	0.0022051	0.0287293	Reactome	R-HSA-6802949	APBB1IP; CSK; ARRB2; FGG; FGA; FGB	1445; 409; 2266; 2244; 54518; 2243	36	36			Metabolism of vitamins and cofactors	0.00360202	0.039003	Reactome	R-HSA-196854	LRP2; QPRT; RETSAT; AMN; PCCB; ALDH1L1; ABCD4; NUDT12; RBP4; RNLS; AKR1C1; SHMT1; GPHN	83594; 54884; 5096; 10840; 55328; 1645; 6470; 10243; 5950; 23475; 81693; 4036; 5826	181	178
Detoxification of Reactive Oxygen Species	0.0022051	0.0287293	Reactome	R-HSA-3299685	NCF2; NCF1; NCF4; P4HB; CYBB; GPX8	1536; 493869; 653361; 4689; 4688; 5034	36	36			Pyruvate metabolism	0.00367168	0.039003	INOH	None	LDHD; ACAT1; GLO1; ALDH1A1; ALDH7A1	501; 216; 38; 2739; 197257	34	34
Fibrin Complement Receptor 3 Signaling Pathway	0.0022051	0.0287293	Wikipathways	WP4136	LBP; ITGB2; SYK; PLG; ITGAM; IRAK4	6850; 3929; 51135; 3689; 5340; 3684	36	36			Pentose and glucuronate interconversions - Homo sapiens (human)	0.00367168	0.039003	KEGG	path:hsa00040	CRYL1; UGT2B7; UGT2B4; XYLB; UGT2A3	51084; 79799; 7363; 7364; 9942	34	34
Toll-Like Receptors Cascades	0.00230255	0.029716	Reactome	R-HSA-168898	LBP; FGG; TBK1; IRAK4; HSP90B1; MAPK14; ITGB2; ITGAM; DNM3; TLR2; S100B; FGA; FGB; S100A8	6285; 51135; 6279; 1432; 2244; 3684; 7184; 3929; 2266; 7097; 26052; 3689; 2243; 29110	154	154			Gluconeogenesis	0.00367168	0.039003	Reactome	R-HSA-70263	PCK2; PCK1; ALDOB; FBP1; G6PC3	92579; 5106; 229; 2203; 5105	35	34
Fc-epsilon receptor I signaling in mast cells	0.00235246	0.0299939	PID	fcer1pathway	INPP5D; VAV1; PRKCB; FCGR2B; SYK; HCLS1; LCP2; LYN	4067; 3059; 3937; 3635; 2213; 7409; 5579; 6850	62	62			Chemical carcinogenesis - Homo sapiens (human)	0.00378713	0.0398534	KEGG	path:hsa05204	UGT2B7; UGT2B4; ADH6; GSTT1; GSTM3; UGT2A3; GSTA1; GSTA3	2947; 130; 2952; 7363; 7364; 79799; 2938; 2940	82	82
Senescence and Autophagy in Cancer	0.00236794	0.0299939	Wikipathways	WP615	MMP14; PCNA; IRF5; CD44; IFI16; HMGA1; MAPK14; IGFBP3; ATG12; VTN; SERPINE1	3486; 7448; 4323; 9140; 3663; 3159; 1432; 960; 5111; 5054; 3428	106	106			Arginine and proline metabolism - Homo sapiens (human)	0.00383706	0.0399537	KEGG	path:hsa00330	SAT2; GAMT; CKB; AGMAT; GATM; ALDH7A1	1152; 2593; 112483; 2628; 79814; 501	50	49
Allograft Rejection	0.00241509	0.0301181	Wikipathways	WP2328	CASP3; STAT1; C9; C1QC; C1QB; C1QA; CD40; C8B; C7; C5	714; 713; 712; 836; 730; 732; 735; 727; 6772; 958	91	91			SLC-mediated transmembrane transport	0.00386763	0.0399537	Reactome	R-HSA-425407	SLC5A1; SLC44A3; SLC2A8; SLC22A5; SLC3A1; SLC6A19; SLCO2A1; SLC22A11; SLC5A12; SLC28A1; SLC5A10; SLC4A1; SLC22A2; SLC12A2; SLC6A13; SLC6A12	55867; 6578; 126969; 6519; 125206; 6521; 159963; 29988; 6539; 9154; 6558; 340024; 6582; 6540; 6523; 6584	245	244
IL-3 Signaling Pathway	0.00242177	0.0301181	Wikipathways	WP286	IL5RA; INPP5D; SYK; PIK3CD; VAV1; HCK; LYN	6850; 3635; 5293; 4067; 3055; 3568; 7409	49	49			Uricosurics Pathway, Pharmacodynamics	0.00403041	0.0412568	PharmGKB	PA166114721	ABCG2; SLC22A11; SLC17A3	10786; 55867; 9429	11	11
Platelet activation - Homo sapiens (human)	0.0025827	0.0317135	KEGG	path:hsa04611	STIM1; APBB1IP; SYK; PIK3CD; MAPK14; FERMT3; GNA13; LCP2; LYN; FGG; FGA; FGB	6786; 5293; 6850; 2243; 2244; 2266; 54518; 83706; 3937; 1432; 10672; 4067	123	123			Fatty Acid Biosynthesis	0.00424289	0.0430405	Wikipathways	WP357	ACAA2; PECR; ECHDC3; ECHDC2	55268; 79746; 55825; 10449	22	22
Collagen formation	0.00261961	0.0317135	Reactome	R-HSA-1474290	PLOD2; PLOD3; P4HB; PLOD1; P4HA2; CD151; P4HA1; MMP9; LOX; CRTAP	977; 8985; 10491; 5351; 4318; 5034; 5033; 8974; 5352; 4015	92	92			Leukotriene metabolism	0.00459671	0.0462134	EHMN	Leukotriene metabolism	ACOX2; ACOT2; GSTZ1; ACAA2; ADHFE1; ALDH7A1; CYP4X1; EHHADH; SLC27A2	8309; 137872; 10449; 501; 1962; 11001; 2954; 260293; 10965	105	103
VEGFA-VEGFR2 Pathway	0.00261961	0.0317135	Reactome	R-HSA-4420097	CYBB; NCF1; NCKAP1L; NCF4; VAV1; PRKCB; PRKCD; MAPK14; PTK2B; NCF2	1432; 5580; 2185; 1536; 3071; 4689; 4688; 5579; 653361; 7409	92	92			Xenobiotics metabolism	0.00469286	0.0467167	EHMN	Xenobiotics metabolism	UGT2B7; UGT2B4; GSTZ1; EPHX2; CYP4X1; AKR1C1	260293; 7364; 2954; 7363; 1645; 2053	53	51
Nef and signal transduction	0.00268232	0.0321878	Reactome	R-HSA-164944	DOCK2; HCK; LCK	3055; 3932; 1794	8	8			Tyrosine metabolism - Homo sapiens (human)	0.00472975	0.0467167	KEGG	path:hsa00350	DDC; FAHD1; AOC3; GSTZ1; ADH6	130; 2954; 8639; 81889; 1644	36	36
miR-targeted genes in squamous cell - TarBase	0.00291789	0.0339759	Wikipathways	WP2006	SLC4A10; BET1; ANXA2; SRPRB; UBE2J1; MPZL1; HMGA1; P4HA2; CBFB; ELOVL5; MAGT1; FNDC3B; GALNT7; GALNT1	64778; 10282; 8974; 9019; 302; 3159; 60481; 58477; 2589; 865; 84061; 51809; 57282; 51465	158	158			Transport of small molecules	0.00491123	0.0474299	Reactome	R-HSA-382551	MMGT1; ANO1; SLC5A1; PRKAR2B; SLC4A1; ATP9B; SLC22A11; CYGB; AMN; SLC28A1; SLC6A19; SLC5A12; SLC5A10; SLC12A2; SLC6A13; TRPV4; SLC44A3; LRRC8A; SLCO2A1; SLC17A3; SLC6A12; ADCY5; ABCG2; SLC2A8; CA1; SLC3A1; ADCY9; CA4; SLC22A5; ABCC9; SLC22A2; ABCC6; LDLRAP1	368; 56262; 26119; 759; 55107; 59341; 6578; 111; 114757; 6519; 5577; 125206; 29988; 762; 9154; 6584; 159963; 55867; 93380; 10060; 374868; 340024; 81693; 9429; 126969; 6521; 6539; 6558; 10786; 6582; 6540; 115; 6523	666	664
Signaling by moderate kinase activity BRAF mutants	0.00293067	0.0339759	Reactome	R-HSA-6802946	APBB1IP; CSK; ARRB2; FGG; FGA; FGB	1445; 409; 2266; 2244; 54518; 2243	38	38			Glycolysis / Gluconeogenesis - Homo sapiens (human)	0.00492425	0.0474299	KEGG	path:hsa00010	PCK2; PCK1; ADH6; G6PC3; FBP1; ALDH7A1; ALDOB	130; 2203; 92579; 229; 5105; 5106; 501	68	68
MAP2K and MAPK activation	0.00293067	0.0339759	Reactome	R-HSA-5674135	APBB1IP; CSK; ARRB2; FGG; FGA; FGB	1445; 54518; 409; 2244; 2243; 2266	38	38			Fatty acid metabolism	0.00498903	0.0474299	Reactome	R-HSA-8978868	PECR; FAAH; SLC22A5; ACOX2; ACOT2; EPHX2; ACAA2; PCCB; CBR4; HAO2; SLC27A2; EHHADH; PHYH	8309; 55825; 5264; 10449; 5096; 51179; 1962; 2053; 11001; 10965; 2166; 6584; 84869	189	185
Paradoxical activation of RAF signaling by kinase inactive BRAF	0.00293067	0.0339759	Reactome	R-HSA-6802955	APBB1IP; CSK; ARRB2; FGG; FGA; FGB	1445; 54518; 409; 2266; 2244; 2243	38	38			Histidine degradation	0.00501257	0.0474299	INOH	None	AOC3; FTCD; ALDH1A1; ALDH7A1	501; 216; 8639; 10841	23	23
Vitamin B12 Metabolism	0.00305732	0.0349089	Wikipathways	WP1533	CRP; SERPINA3; MPO; F2; PLG; APOE; SERPINE1	1401; 5054; 12; 348; 4353; 5340; 2147	51	51			Histidine metabolism - Homo sapiens (human)	0.00501257	0.0474299	KEGG	path:hsa00340	AMDHD1; FTCD; ASPA; ALDH7A1	10841; 443; 144193; 501	23	23
Direct p53 effectors	0.00306218	0.0349089	PID	p53downstreampathway	PCNA; IRF5; RPS27L; CASP1; EGFR; TAF9; SFN; IGFBP3; SPP1; PML; PYCARD; STEAP3; SERPINE1	1956; 5371; 29108; 6880; 3663; 51065; 5054; 55240; 2810; 3486; 6696; 834; 5111	143	142			Pathways in clear cell renal cell carcinoma	0.00506861	0.0475605	Wikipathways	WP4018	PSPH; GRB10; SHMT1; LDHD; ALDOB; TSC2; KDR; TSC1	6470; 3791; 7249; 7248; 197257; 2887; 229; 5723	86	86
Central carbon metabolism in cancer - Homo sapiens (human)	0.00317944	0.035946	KEGG	path:hsa05230	SLC7A5; HK2; EGFR; SLC16A3; G6PD; PIK3CD; HK3; SLC1A5	3099; 9123; 1956; 5293; 3101; 2539; 8140; 6510	65	65			Adipocytokine signaling pathway - Homo sapiens (human)	0.00533826	0.0487393	KEGG	path:hsa04920	PCK2; PCK1; CD36; AKT3; G6PC3; MAPK8; ADIPOQ	10000; 9370; 92579; 5105; 948; 5599; 5106	69	69
Amoebiasis - Homo sapiens (human)	0.00331756	0.0372002	KEGG	path:hsa05146	ITGB2; CASP3; PRKCB; PIK3CD; C8B; CTSG; TLR2; C9; ITGAM; C8G	5293; 3684; 3689; 732; 733; 735; 836; 7097; 5579; 1511	96	95			Vitamin B6-dependent and responsive disorders	0.00549724	0.0487393	Wikipathways	WP4228	AASS; ALDH7A1	501; 10157	4	4
Synthesis of 5-eicosatetraenoic acids	0.00391005	0.0434874	Reactome	R-HSA-2142688	ALOX5; ALOX5AP; PON2	5445; 240; 241	9	9			Utilization of Ketone Bodies	0.00549724	0.0487393	Reactome	R-HSA-77108	ACAT1; OXCT1	5019; 38	4	4
VEGFA-VEGFR2 Signaling Pathway	0.00415206	0.0442566	Wikipathways	WP3888	MMP14; MAPK14; DNAJB9; CSK; STAT1; RAB4A; PRKCB; PRKCD; FGA; FHL2; PTK2B; ARRB2; NRP2; NCF1; FGG; NCF2; PTPRJ; FGB	5580; 2244; 4323; 5795; 2274; 1432; 5579; 6772; 4189; 5867; 2266; 4688; 653361; 8828; 2185; 409; 2243; 1445	236	236			Carnitine synthesis	0.00549724	0.0487393	Reactome	R-HSA-71262	SHMT1; BBOX1	6470; 8424	4	4
internal ribosome entry pathway	0.00419012	0.0442566	BioCarta	irespathway	PTBP2; CASP4; CASP3; CASP1	58155; 836; 837; 834	18	18			Reuptake of GABA	0.00549724	0.0487393	Reactome	R-HSA-888593	SLC6A13; SLC6A12	6540; 6539	4	4
Non-genomic actions of 1,25 dihydroxyvitamin D3	0.00421636	0.0442566	Wikipathways	WP4341	TLR2; STAT2; STAT1; PRKCB; CD40; PRKCD; MAPK14; OAS2	1432; 7097; 958; 5580; 5579; 4939; 6772; 6773	68	68			lysine degradation I (saccharopine pathway)	0.00549724	0.0487393	HumanCyc	LYSINE-DEG1-PWY	AASS; ALDH7A1	10157; 501	4	4
BCR signaling pathway	0.00421636	0.0442566	PID	bcr_5pathway	INPP5D; CSK; SYK; CARD11; FCGR2B; MAPK14; PTPRC; LYN	4067; 2213; 1432; 84433; 5788; 3635; 1445; 6850	68	68			Amino acid conjugation of benzoic acid	0.00549724	0.0487393	Wikipathways	WP521	GLYATL1; GLYAT	92292; 10249	4	4
RUNX3 regulates RUNX1-mediated transcription	0.00425276	0.0442566	Reactome	R-HSA-8951911	CBFB; RUNX1	861; 865	4	3			Bile acid biosynthesis	0.00568139	0.0499784	EHMN	Bile acid biosynthesis	ACOX2; ACOT2; ADHFE1; ALDH7A1; EHHADH; SLC27A2	8309; 501; 137872; 11001; 10965; 1962	53	53
RUNX2 regulates genes involved in differentiation of myeloid cells	0.00425276	0.0442566	Reactome	R-HSA-8941333	LGALS3; CBFB	3958; 865	3	3			Ephrin B reverse signaling	0.00587055	0.0512421	PID	ephrinbrevpathway	EFNB2; PTPN13; MAPK8; PIK3CA	5599; 1948; 5783; 5290	24	24
The AIM2 inflammasome	0.00425276	0.0442566	Reactome	R-HSA-844615	PYCARD; CASP1	29108; 834	3	3			Glutathione conjugation	0.00598801	0.0518654	Reactome	R-HSA-156590	GSTM3; GSTZ1; GSTA1; GSTT1; GSTA3	2952; 2947; 2940; 2954; 2938	39	38
Metabolism of vitamin K	0.00425276	0.0442566	Reactome	R-HSA-6806664	VKORC1; VKORC1L1	154807; 79001	3	3			Pyruvate metabolism and Citric Acid (TCA) cycle	0.00622895	0.0531399	Reactome	R-HSA-71406	L2HGDH; MPC1; GSTZ1; FAHD1; ADHFE1; GLO1	137872; 2954; 79944; 51660; 2739; 81889	54	54
Selenium Micronutrient Network	0.00428923	0.0442566	Wikipathways	WP15	CRP; SERPINA3; KMO; MPO; ALOX5; F2; PLG; ALOX5AP; SERPINE1	8564; 5054; 1401; 241; 240; 4353; 12; 5340; 2147	83	83			Longevity regulating pathway - Homo sapiens (human)	0.00622954	0.0531399	KEGG	path:hsa04211	ADCY5; IGF1R; PIK3CA; ADCY9; AKT3; TSC2; ADIPOQ; TSC1	7248; 7249; 111; 115; 9370; 5290; 10000; 3480	89	89
Chemokine signaling pathway	0.00431639	0.0442566	Wikipathways	WP3929	NCF1; RAC2; STAT2; STAT1; DOCK2; PRKCB; PIK3CD; PRKCD; CSK; VAV1; PTK2B; ARRB2; HCK; LYN	5580; 409; 5579; 6772; 6773; 1794; 4067; 653361; 2185; 5880; 7409; 5293; 1445; 3055	165	165			Non-alcoholic fatty liver disease (NAFLD) - Homo sapiens (human)	0.00659488	0.0545784	KEGG	path:hsa04932	NDUFA7; NDUFB9; PIK3CA; UQCRQ; COX4I2; AKT3; COX6C; COX8A; MAPK8; COX7A2; ADIPOQ	4701; 4715; 9370; 5290; 84701; 10000; 5599; 1345; 1347; 1351; 27089	149	149
Binding and Uptake of Ligands by Scavenger Receptors	0.00433508	0.0442566	Reactome	R-HSA-2173782	APOE; HP; CALR; HSP90B1; CD163; MSR1	348; 9332; 3240; 811; 4481; 7184	41	41			Erythrocytes take up carbon dioxide and release oxygen	0.00667201	0.0545784	Reactome	R-HSA-1237044	CA1; SLC4A1; CA4	762; 6521; 759	13	13
Metabolism of proteins	0.00446886	0.0452845	Reactome	R-HSA-392499	RAB4B; RAB4A; PMM2; DYNLL1; SLC30A7; SLC30A6; EIF3H; BCS1L; HIST2H2AB; FSTL1; INHBC; FGG; FGA; P4HB; NUP93; CTSG; SEC24D; CTSZ; RPL12; TRAPPC5; CPB2; CYLD; MRPL46; XRN2; RPS27L; RPL7; GORASP1; QSOX1; PROS1; HSP90B1; SEC63; HSCB; APOE; ADAMTSL4; PNPLA2; DERL2; B4GALT1; KIN; TARS2; RCN1; VNN2; VNN1; MAN2A2; IGFBP3; SRPRB; STT3A; GALNT7; GALNT1; GALNT2; SDC2; COX19; RAB3A; OXA1L; RPLP1; ARRB2; MAGT1…	5371; 6231; 57104; 22944; 53916; 84061; 409; 1361; 1540; 5867; 9789; 5373; 2589; 617; 5954; 8667; 6230; 6223; 23423; 8875; 51009; 10282; 55676; 4245; 6747; 6696; 1511; 54507; 7184; 6222; 7345; 3956; 6383; 23168; 64708; 51065; 2683; 58477; 6169; 348; 10762; 148867; 8894; 90639; 10952; 8876; 150274; 4758; 28972; 64689; 2147; 51809; 4247; 2590; 1155; 6136; 811; 126003; 6129; 4122; 54587; 5768; 3703;…	2008	1999			O2/CO2 exchange in erythrocytes	0.00667201	0.0545784	Reactome	R-HSA-1480926	CA1; SLC4A1; CA4	762; 6521; 759	13	13
t cell receptor signaling pathway	0.00470279	0.0473046	BioCarta	tcrpathway	NCF2; VAV1; PRKCB; PTPRC; ZAP70; ARHGAP4; LCK	3932; 7535; 5788; 4688; 7409; 5579; 393	55	55			Purine salvage	0.00667201	0.0545784	Reactome	R-HSA-74217	GMPR2; ADAL; GMPR	2766; 51292; 161823	13	13
Transport to the Golgi and subsequent modification	0.00506239	0.05055	Reactome	R-HSA-948021	BET1; CTSZ; SEC24D; GORASP1; TRAPPC5; MAN2A2; TMED9; MGAT1; MGAT2; LMAN1; TMED3; B4GALT1; DYNLL1; FUT8	4122; 4247; 54732; 10282; 2530; 2683; 1522; 8655; 3998; 4245; 64689; 9871; 23423; 126003	168	168			D-<i>myo</i>-inositol (1,4,5)-trisphosphate degradation	0.00667201	0.0545784	HumanCyc	PWY-6363	INPP5A; IMPA2; INPP5F	22876; 3632; 3613	13	13
Pantothenate and CoA biosynthesis - Homo sapiens (human)	0.00514958	0.0506808	KEGG	path:hsa00770	VNN2; VNN1; BCAT1; DPYD	586; 8875; 8876; 1806	19	19			Signaling events regulated by Ret tyrosine kinase	0.00669797	0.0545784	PID	ret_pathway	GRB10; MAPK8; SHANK3; PIK3CA; GAB1	2549; 5599; 85358; 2887; 5290	39	39
Scavenging by Class A Receptors	0.00514958	0.0506808	Reactome	R-HSA-3000480	CALR; APOE; HSP90B1; MSR1	4481; 7184; 811; 348	19	19			Adherens junction - Homo sapiens (human)	0.00673748	0.0545784	KEGG	path:hsa04520	TGFBR2; IGF1R; FARP2; FER; PTPRB; CDH1; CTNNA2	7048; 3480; 5787; 2241; 1496; 999; 9855	72	72
Reactions specific to the complex N-glycan synthesis pathway	0.00542863	0.0522983	Reactome	R-HSA-975578	MGAT2; MAN2A2; FUT8	4122; 4247; 2530	10	10			Metabolism of polyamines	0.00746483	0.0596271	Reactome	R-HSA-351202	SLC6A12; GATM; GAMT; ASS1; CKB	2593; 1152; 6539; 2628; 445	40	40
Gemcitabine Pathway, Pharmacodynamics	0.00542863	0.0522983	PharmGKB	PA2036	DCK; RRM1; CDA	6240; 1633; 978	10	10			Metabolism of water-soluble vitamins and cofactors	0.00746663	0.0596271	Reactome	R-HSA-196849	QPRT; AMN; PCCB; ALDH1L1; NUDT12; RNLS; ABCD4; SHMT1; GPHN	83594; 5096; 10840; 55328; 6470; 10243; 23475; 81693; 5826	114	111
Hyaluronan uptake and degradation	0.00542863	0.0522983	Reactome	R-HSA-2160916	CD44; SLC9A1; GUSB	6548; 960; 2990	10	10			Glucuronidation	0.0078679	0.0623892	Wikipathways	WP698	PGM5; UGT2B4; UGT2A3; UGT2B7	79799; 5239; 7363; 7364	26	26
Toll-like Receptor Signaling Pathway	0.00552436	0.0528484	Wikipathways	WP75	LBP; IRF5; STAT1; PIK3CD; CD40; MAPK14; TBK1; SPP1; TLR2; IRAK4	3929; 29110; 3663; 1432; 6772; 7097; 51135; 6696; 5293; 958	102	102			Synthesis of IP2, IP, and Ins in the cytosol	0.00829906	0.0653478	Reactome	R-HSA-1855183	INPP5A; IMPA2; INPP4B	8821; 3632; 3613	14	14
Influenza A - Homo sapiens (human)	0.00590912	0.055606	KEGG	path:hsa05164	IL18; MAPK14; STAT2; STAT1; CASP1; PRKCB; PIK3CD; PLG; OAS2; TBK1; PML; PYCARD; IRAK4; AGFG1	3606; 6772; 6773; 5293; 3267; 5340; 5371; 834; 1432; 29108; 29110; 51135; 4939; 5579	171	171			Nonalcoholic fatty liver disease	0.00877846	0.0654899	Wikipathways	WP4396	NDUFA7; NDUFB9; PIK3CA; UQCRQ; COX4I2; AKT3; ADIPOQ; COX8A; COX7A2; MAPK8; COX6C	4701; 9370; 5599; 84701; 1345; 1347; 27089; 1351; 10000; 5290; 4715	155	155
Regulation of p38-alpha and p38-beta	0.00593456	0.055606	PID	p38alphabetapathway	MAPK14; HCK; LYN; LCK; MAP3K3	4067; 3932; 3055; 1432; 4215	31	31			Fructose catabolism	0.00897496	0.0654899	Reactome	R-HSA-70350	ALDOB; ALDH1A1	229; 216	5	5
amb2 Integrin signaling	0.00593456	0.055606	PID	amb2_neutrophils_pathway	PLG; HCK; ITGB2; ITGAM; MMP9	5340; 3055; 4318; 3689; 3684	31	31			4-hydroxy-2-nonenal detoxification	0.00897496	0.0654899	HumanCyc	PWY-7112	GSTA1; GSTA3	2940; 2938	5	5
Toll-like receptor signaling pathway - Homo sapiens (human)	0.00632907	0.0588991	KEGG	path:hsa04620	LBP; IRF5; STAT1; PIK3CD; CD40; MAPK14; TBK1; SPP1; TLR2; IRAK4	6696; 3663; 6772; 5293; 3929; 1432; 29110; 7097; 958; 51135	104	104			fatty acid &alpha;-oxidation	0.00897496	0.0654899	HumanCyc	PWY66-387	SLC27A2; PHYH	5264; 11001	5	5
Degradation of the extracellular matrix	0.00676417	0.0613568	Reactome	R-HSA-1474228	MMP14; CASP3; CD44; CTSG; PLG; CAPN6; SPP1; ADAM15; MMP9; HTRA1	4318; 4323; 827; 6696; 1511; 8751; 5654; 5340; 960; 836	105	105			Abacavir transmembrane transport	0.00897496	0.0654899	Reactome	R-HSA-2161517	ABCG2; SLC22A2	6582; 9429	5	5
ROS, RNS production in phagocytes	0.00681742	0.0613568	Reactome	R-HSA-1222556	CYBB; TCIRG1; NCF1; NCF2; NCF4	1536; 653361; 4689; 10312; 4688	32	32			phospholipase c signaling pathway	0.00897496	0.0654899	BioCarta	plcpathway	PLCB1; PIK3CA	23236; 5290	5	5
Syndecan-4-mediated signaling events	0.00681742	0.0613568	PID	syndecan_4_pathway	PLG; F2; PRKCD; TNC; MMP9	2147; 5340; 4318; 3371; 5580	32	32			Catabolism of glucuronate to xylulose-5-phosphate	0.00897496	0.0654899	Reactome	R-HSA-5661270	CRYL1; XYLB	51084; 9942	5	5
bcr signaling pathway	0.00681742	0.0613568	BioCarta	bcrpathway	MAPK14; VAV1; LYN; PRKCB; SYK	4067; 1432; 7409; 5579; 6850	32	32			asparagine degradation	0.00897496	0.0654899	HumanCyc	ASPARAGINE-DEG1-PWY-1	ASRGL1; ASPG	80150; 374569	5	5
Osteopontin-mediated events	0.00681742	0.0613568	PID	avb3_opn_pathway	SYK; CD44; PTK2B; SPP1; MMP9	6696; 960; 4318; 6850; 2185	32	32			spermine and spermidine degradation I	0.00897496	0.0654899	HumanCyc	PWY-6117	SAT2; AOC3	112483; 8639	5	5
Class I PI3K signaling events	0.0069093	0.061655	PID	pi3kcipathway	INPP5D; SYK; ZAP70; HCK; LYN; LCK	4067; 3932; 7535; 3635; 3055; 6850	45	45			Abacavir metabolism	0.00897496	0.0654899	Reactome	R-HSA-2161541	PCK1; ADAL	161823; 5105	5	5
Formation of the ternary complex, and subsequently, the 43S complex	0.0069407	0.061655	Reactome	R-HSA-72695	RPS26; EIF3H; RPS25; RPS27L; RPS19; RPS18; EIF2S2	6223; 51065; 6231; 6222; 8894; 6230; 8667	61	59			Cell death signalling via NRAGE, NRIF and NADE	0.00900523	0.0654899	Reactome	R-HSA-204998	ARHGEF37; ARHGEF15; VAV2; MCF2L; NGFR; MAPK8; ARHGEF40	389337; 55701; 5599; 22899; 7410; 4804; 23263	78	76
IL6	0.00705235	0.0622427	NetPath	Pathway_IL6	STAT1; VAV1; CD40; PRKCD; MAPK14; PTK2B; HCK; LYN	4067; 6772; 3055; 958; 1432; 5580; 7409; 2185	74	74			Glutamate Glutamine metabolism	0.00901504	0.0654899	INOH	None	GPT; ALDH1A1; ABAT; ALDH7A1	501; 216; 2875; 18	27	27
Translation	0.00720428	0.063176	Reactome	R-HSA-72766	EIF3H; RPS26; RPS25; SRPRB; RPS27L; SPCS2; OXA1L; RPL7; RPLP1; RPS18; SEC61B; SSR1; MRPS14; SPCS1; MRPL46; TARS2; RPL38; EIF2S2; RPL12; RPS19; SSR3	6176; 8667; 6230; 80222; 9789; 63931; 51065; 6136; 6222; 58477; 6223; 6747; 6169; 5018; 6231; 8894; 28972; 6129; 10952; 6745; 26589	310	307			Splicing factor NOVA regulated synaptic proteins	0.00917796	0.0662461	Wikipathways	WP4148	EPB41L1; ANK3; RAP1GAP; PRKCZ; GPHN	2036; 288; 5909; 10243; 5590	42	42
Rho GTPase cycle	0.00732811	0.0638525	Reactome	R-HSA-194840	RAC2; VAV1; GMIP; ARHGAP30; AKAP13; GNA13; ARHGAP25; MYO9B; ARHGAP4; RHOG; ARHGAP18; ARHGAP9	5880; 9938; 64333; 4650; 257106; 10672; 393; 51291; 391; 93663; 11214; 7409	144	140			SHP2 signaling	0.0095556	0.0685325	PID	shp2_pathway	IGF1R; TEK; PIK3CA; IL6ST; GAB1; KDR	2549; 3791; 7010; 3572; 3480; 5290	59	59
L13a-mediated translational silencing of Ceruloplasmin expression	0.00737486	0.0638532	Reactome	R-HSA-156827	RPS26; EIF3H; RPS25; RPL38; RPS27L; RPL7; RPLP1; RPS18; RPL12; RPS19; EIF2S2	6176; 6230; 6223; 51065; 6136; 6129; 6222; 6169; 6231; 8667; 8894	125	123
Regulation of RhoA activity	0.00769597	0.0662144	PID	rhoa_reg_pathway	AKAP13; DEF6; VAV1; ARHGAP9; ARHGAP4; MYO9B	50619; 7409; 11214; 64333; 4650; 393	48	46
NOD1/2 Signaling Pathway	0.00778819	0.0664778	Reactome	R-HSA-168638	MAPK14; CASP4; CYLD; CARD9; CASP1	1540; 837; 1432; 64170; 834	33	33
GTP hydrolysis and joining of the 60S ribosomal subunit	0.00782377	0.0664778	Reactome	R-HSA-72706	RPS26; EIF3H; RPS25; RPL38; RPS27L; RPL7; RPLP1; RPS18; RPL12; RPS19; EIF2S2	6176; 6230; 6223; 51065; 6136; 6129; 6222; 6169; 6231; 8667; 8894	126	124
Viral Acute Myocarditis	0.00826088	0.0682342	Wikipathways	WP4298	ITGB2; RAC2; CASP3; STAT1; MMP9; PYCARD; AIF1; BNIP2	199; 5880; 836; 4318; 663; 3689; 6772; 29108	76	76
transcriptional activation of dbpb from mrna	0.00829059	0.0682342	BioCarta	dbpbpathway	F2; YBX1	2147; 4904	4	4
pentose phosphate pathway (oxidative branch)	0.00829059	0.0682342	HumanCyc	OXIDATIVEPENT-PWY-1	PGD; G6PD	5226; 2539	4	4
proline biosynthesis	0.00829059	0.0682342	HumanCyc	PROSYN-PWY	PYCR2; PYCR1	29920; 5831	4	4
Proton/oligopeptide cotransporters	0.00829059	0.0682342	Reactome	R-HSA-427975	SLC15A3; SLC15A4	121260; 51296	4	4
Metabolism of vitamins and cofactors	0.00832976	0.0682342	Reactome	R-HSA-196854	NADK; CD38; APOE; VNN1; VNN2; VKORC1; SDC2; MTHFD1L; SLC2A3; NAMPT; VKORC1L1; NNMT; SLC25A19; ABCC1	25902; 65220; 348; 60386; 8875; 6515; 79001; 4363; 4837; 10135; 6383; 8876; 952; 154807	181	178
Nucleotide-binding domain, leucine rich repeat containing receptor (NLR) signaling pathways	0.00854516	0.069582	Reactome	R-HSA-168643	CASP4; CASP1; MAPK14; CARD9; CYLD; PYCARD	837; 1432; 29108; 1540; 834; 64170	47	47
Extracellular vesicles in the crosstalk of cardiac cells	0.00887897	0.0718724	Wikipathways	WP4300	CD63; EGFR; SPP1; MMP9	4318; 1956; 967; 6696	22	22
Interleukin-2 signaling	0.00940196	0.0747784	Reactome	R-HSA-9020558	SYK; PTK2B; LCK	3932; 2185; 6850	12	12
PECAM1 interactions	0.00940196	0.0747784	Reactome	R-HSA-210990	LYN; INPP5D; LCK	4067; 3635; 3932	12	12
Hyaluronan metabolism	0.00940196	0.0747784	Reactome	R-HSA-2142845	CD44; SLC9A1; GUSB	6548; 960; 2990	12	12
NF-kappa B signaling pathway - Homo sapiens (human)	0.0096219	0.0760853	KEGG	path:hsa04064	LBP; SYK; CARD11; PRKCB; CD40; ZAP70; LYN; LCK; IRAK4	6850; 3929; 3932; 7535; 958; 51135; 5579; 84433; 4067	95	94
Epstein-Barr virus infection - Homo sapiens (human)	0.00980651	0.0764032	KEGG	path:hsa05169	TLR2; SNW1; STAT2; STAT1; SYK; CD44; CALR; PIK3CD; CD40; MAPK14; OAS2; TBK1; LYN; IRAK4; CASP3	6772; 6773; 5293; 4067; 811; 836; 4939; 1432; 22938; 29110; 7097; 958; 51135; 960; 6850	201	200
Metabolism of water-soluble vitamins and cofactors	0.00988169	0.0764032	Reactome	R-HSA-196849	NADK; CD38; VNN1; VNN2; MTHFD1L; SLC2A3; NAMPT; NNMT; SLC25A19; ABCC1	25902; 65220; 60386; 6515; 4363; 4837; 10135; 8875; 952; 8876	114	111
LPA receptor mediated events	0.0098855	0.0764032	PID	lysophospholipid_pathway	CASP3; EGFR; PRKCD; PTK2B; GNA13; MMP9; LYN	4067; 1956; 836; 10672; 5580; 4318; 2185	64	63
IL4	0.0098855	0.0764032	NetPath	Pathway_IL4	INPP5D; STAT1; SYK; PIK3CD; CD40; PRKCD; MAPK14	6772; 5293; 958; 1432; 5580; 3635; 6850	63	63

## Sheet: GP2_proteins
GP2 up-regulated proteins									GP2 down-regulated proteins
Gene symbols	GP2	GP1&GP3	Fold change	p-value	None-zero in GP2	None-zero in GP1&GP3			Gene symbols	GP2	GP1&GP3	Fold change	p-value	None-zero in GP2	None-zero in GP1&GP3
A1CF	0.381542	0.111179	3.43177	2.79e-09	84	76			ABI3BP	0.115744	0.316706	0.365462	0.012094	74	113
AAMDC	0.704214	0.281861	2.49844	0.000263459	82	89			ACAP1	0.0137011	0.0598791	0.228813	0.00449713	18	41
AARS2	0.551242	0.240385	2.29316	2.06e-10	99	119			ADAMTSL4	0.0090598	0.0868192	0.104352	7.92e-06	27	67
AASS	0.645871	0.0686087	9.41383	1.58e-17	95	87			AEBP1	0.552291	2.08845	0.26445	0.000240426	94	128
ABAT	6.35925	1.49119	4.26455	1.73e-12	98	118			AHSG	10.6375	23.0844	0.460809	0.0481712	99	133
ABCA3	0.0324053	0.00329752	9.82716	0.00023861	37	26			ANAPC5	0.0205032	0.0436608	0.469602	3.67e-06	77	64
ABCB1	0.370093	0.10075	3.67338	9.19e-11	94	97			ANGPTL2	0.42864	1.13313	0.378279	0.000149055	91	131
ABCB10	0.231047	0.0999313	2.31206	2.47e-06	92	107			ANGPTL4	0.18741	0.80352	0.233236	0.00600727	73	113
ABCB11	0.0148245	0.00304015	4.87625	5.31e-05	46	29			AP5S1	0.0199337	0.1136	0.175473	0.00178352	45	31
ABCB6	0.563378	0.234754	2.39986	9.38e-09	99	129			APOA1	365.612	794.926	0.459933	1.37e-06	99	133
ABCB7	0.298489	0.118728	2.51406	1.22e-06	99	125			APOA2	4.17449	19.6486	0.212458	0.000329214	96	131
ABCB8	0.167606	0.0480003	3.49178	0.000217744	76	79			APOC1	8.72741	25.0912	0.347828	4.7e-07	99	133
ABCC9	0.0239117	0.0112059	2.13386	0.00563929	43	35			APOC3	3.66329	7.68913	0.476424	0.0270203	95	131
ABCD1	0.21512	0.107103	2.00854	8.98e-06	97	115			APOE	3.49531	15.2321	0.22947	2.68e-05	99	133
ABCD4	0.175804	0.0175645	10.009	5.08e-08	71	55			APOF	0.0632728	0.255218	0.247917	0.000384238	38	79
ABCG1	0.0228069	0.00810128	2.81522	0.00038889	41	26			APOH	15.5606	35.7438	0.435337	2.12e-07	99	133
ABCG2	0.0139468	0.00622947	2.23884	0.00664304	46	41			APOL1	0.115441	0.330148	0.349664	0.00100326	82	121
ABHD10	9.61899	2.84019	3.38674	4.46e-13	99	131			APOM	0.437607	1.29448	0.338056	0.0168868	83	121
ABHD11	1.64793	0.636514	2.589	1.07e-09	99	126			BCAT1	0.0542001	0.192493	0.28157	2.47e-06	58	109
ABHD14B	9.95124	4.48472	2.21892	3.59e-15	99	133			BCHE	0.014343	0.0396725	0.361536	0.0163078	63	99
ABHD6	0.296232	0.101902	2.90704	2.22e-13	95	92			BPTF	0.00847818	0.0360972	0.234871	0.0142121	55	50
ACAA1	3.65986	0.945717	3.86993	6.45e-12	99	131			BTF3	1.29989	4.00256	0.324765	7.73e-05	93	103
ACAA2	44.3533	11.3865	3.89526	2.17e-20	99	132			C1QA	0.0978237	0.339448	0.288185	0.0001385	74	117
ACAD10	0.313315	0.0379757	8.25041	1.19e-11	78	56			C1QB	1.58512	7.68467	0.206271	8.78e-11	98	133
ACAD8	1.36072	0.285213	4.77087	2.02e-12	99	116			C1QC	0.634274	2.0522	0.30907	5.45e-07	97	133
ACADL	3.02903	0.922266	3.28433	2.31e-12	96	101			C1QTNF5	0.569231	3.0017	0.189636	4.25e-06	66	116
ACADM	14.1317	3.72076	3.79808	3.61e-14	99	131			C1R	0.346911	0.923893	0.375489	1.6e-05	96	132
ACADS	4.97197	1.90892	2.6046	3.25e-10	99	129			C1RL	0.0485677	0.224976	0.215879	0.00106667	69	111
ACADSB	3.58252	0.915596	3.91278	3.86e-13	99	122			C1S	0.488552	1.36216	0.358661	3.86e-09	99	133
ACADVL	17.2613	8.60974	2.00486	1.66e-09	99	132			C2	0.493944	1.01782	0.485296	1.64e-06	99	133
ACAT1	69.1128	9.76037	7.08097	1.74e-22	99	133			C3	20.9571	44.9854	0.465864	9.54e-08	99	133
ACBD6	0.168477	0.0623905	2.70036	0.000182623	78	80			C4BPA	1.81665	6.14521	0.29562	3.2e-14	99	133
ACE2	4.39894	0.581373	7.56646	1.08e-13	96	98			C4BPB	0.0802018	0.209573	0.382692	2.73e-11	31	94
ACMSD	0.133159	0.0310717	4.28554	3.19e-09	66	40			C5	0.631123	1.86091	0.339147	3.75e-07	99	133
ACO1	6.11355	1.33888	4.56618	6.17e-18	99	133			C6	0.403766	1.86221	0.216821	1.25e-07	96	133
ACO2	54.3796	16.0815	3.3815	5.15e-17	99	133			C7	0.49787	2.31808	0.214776	8.28e-06	97	133
ACOT1	1.23854	0.0987223	12.5457	0.00339686	34	27			C8A	0.394566	1.23252	0.32013	4.01e-05	96	132
ACOT11	0.252956	0.0454354	5.56738	2.16e-11	82	62			C8B	0.300189	1.31071	0.229028	1.36e-07	95	133
ACOT13	12.9628	2.78113	4.66099	1.65e-12	99	127			C8G	1.0651	3.93311	0.270804	1.8e-07	97	133
ACOT2	1.33611	0.211672	6.31218	3.8e-12	95	97			C9	3.40613	14.941	0.227972	3.91e-07	98	133
ACOT8	0.190672	0.0499918	3.81406	0.000127869	80	82			CCDC80	0.0054697	0.0782478	0.0699022	1.77e-10	9	57
ACOX1	1.22515	0.467337	2.62156	5.54e-10	99	125			CCDC90B	0.796464	2.67072	0.298221	0.00784548	95	111
ACOX2	0.319679	0.0402635	7.93967	1.23e-09	75	58			CD163	0.389786	1.02926	0.378705	0.000270832	98	131
ACSF2	2.43328	0.396982	6.12945	0.000188591	94	109			CD163L1	0.00373071	0.0103232	0.361389	0.00102975	15	44
ACSF3	0.149909	0.0626029	2.3946	8.69e-05	91	104			CD209	0.0118004	0.0828818	0.142376	0.000194305	15	45
ACSL1	8.69445	3.79158	2.29309	8.11e-10	99	132			CD44	1.42992	4.50003	0.317757	3.63e-07	99	133
ACSM2A	21.3886	1.8433	11.6034	8.12e-17	97	95			CD55	0.0540245	0.213855	0.252622	5.95e-06	46	93
ACSM2B	23.0458	2.50116	9.21405	1.8e-15	97	100			CD5L	0.217203	0.467208	0.464896	0.00299977	91	130
ACSM3	1.98363	0.414377	4.78703	6.41e-15	96	84			CDKAL1	0.064298	0.159838	0.40227	0.010488	69	71
ACSM5	0.181286	0.0342255	5.2968	4.5e-11	72	44			CEACAM1	0.0608716	0.197624	0.308018	0.00140781	80	77
ACSS1	1.27332	0.246373	5.16826	8.72e-13	99	118			CFB	2.75162	5.70951	0.481936	0.000838721	99	133
ACSS3	1.84532	0.330935	5.57608	0.00134601	86	103			CFH	4.77899	11.4282	0.418177	5.92e-12	99	133
ACTR1A	5.71943	2.80841	2.03654	1.27e-16	99	133			CFHR4	0.0109773	0.0626989	0.175079	0.00263965	34	67
ACTR1B	1.00918	0.487768	2.06898	1.37e-08	99	128			CFHR5	0.0649129	0.276463	0.234798	2.12e-13	21	89
ACTR5	0.0166675	0.0072497	2.29906	0.000160769	61	52			CFI	0.851679	1.73937	0.489649	1.17e-09	99	133
ACY1	19.9404	2.15126	9.26919	6.27e-13	99	124			CLEC11A	0.0997608	0.263553	0.378523	3.99e-05	57	106
ACY3	0.911567	0.259514	3.5126	1.21e-08	92	98			CLEC3B	1.54599	7.00057	0.220837	0.001018	97	131
ACYP1	0.702688	0.344369	2.04051	3.99e-11	98	100			CLU	9.80327	95.0832	0.103102	9.66e-12	99	133
ADAL	0.0265035	0.0062994	4.20731	3.2e-06	44	21			CNNM3	0.285189	0.671382	0.424779	8.66e-09	96	103
ADCK1	0.147129	0.018505	7.95078	0.000110846	43	27			COL14A1	5.65111	12.3464	0.457713	0.000857533	99	133
ADCK3	0.661694	0.314154	2.10627	1.15e-07	98	120			COL1A2	32.6102	70.6023	0.461885	1.08e-06	99	133
ADCK4	0.103578	0.0467041	2.21774	4.97e-10	90	78			COL2A1	0.101529	0.295476	0.343613	0.0492148	47	73
ADCK5	0.0242719	0.00711256	3.41255	4.32e-10	67	36			COL3A1	0.169613	0.837934	0.202418	1.77e-06	89	130
ADCY5	0.00527929	0.00199737	2.64312	6.54e-05	44	28			COL5A1	0.0361998	0.137348	0.263563	4.72e-12	51	119
ADCY6	0.00533929	0.00143564	3.71911	3.68e-05	40	19			COL8A1	0.151937	0.504048	0.301434	5.51e-05	81	122
ADCY9	0.00610566	0.0014015	4.3565	2.52e-05	43	23			CP	8.43877	18.545	0.455043	1.22e-07	99	133
ADH5	12.1269	5.53913	2.18931	2.56e-17	99	133			CPB2	0.274185	1.18108	0.232148	2.65e-06	87	131
ADH6	0.34026	0.0109168	31.1686	2e-11	63	30			CPN1	0.0373385	0.120352	0.310244	0.000975335	58	101
ADHFE1	0.146325	0.013612	10.7497	4.84e-15	66	24			CPN2	0.350888	0.959435	0.365724	0.000119128	95	132
ADI1	0.838908	0.409524	2.0485	4.31e-09	96	100			CRP	0.137103	1.8861	0.0726915	0.000267796	28	62
ADIRF	2.59269	1.07371	2.41471	3.04e-06	92	102			CTGF	0.0373554	0.502679	0.0743126	1.78e-06	31	77
ADNP	0.0648713	0.0277779	2.33536	3.18e-05	93	107			CTHRC1	0.141254	0.591922	0.238637	8.58e-08	63	116
ADSSL1	11.2069	5.25095	2.13426	0.0185	92	122			CTSG	1.18018	4.97064	0.237431	0.000265147	78	125
AES	0.0921465	0.0441126	2.08889	5.63e-08	69	46			CTTNBP2	0.0101352	0.0261602	0.387426	0.00658729	41	32
AFAP1L2	0.221075	0.0795989	2.77736	0.000194982	87	98			DCN	8.23177	22.5237	0.365471	0.00321265	92	128
AFG3L2	2.92163	0.983244	2.97141	1.43e-14	99	132			DDX20	0.0460458	0.0949068	0.485168	0.0257627	46	42
AFMID	0.957223	0.282659	3.38649	4.03e-11	83	60			DDX51	0.03829	0.280575	0.13647	0.0166467	48	40
AFTPH	0.204021	0.0460165	4.43365	2.48e-19	94	74			DOK3	0.014286	0.0870711	0.164072	0.00131258	28	58
AGAP1	0.154486	0.069709	2.21616	1.5e-07	77	63			DPT	5.50775	22.1083	0.249126	0.0286292	96	131
AGAP3	0.0557715	0.0262684	2.12314	3.57e-07	71	53			ECM1	0.374101	1.77958	0.210218	2.1e-10	97	132
AGFG2	0.0512043	0.0212692	2.40744	8.71e-06	66	53			ECM2	0.00597515	0.058935	0.101385	7.43e-06	25	67
AGL	1.96242	0.841203	2.33287	3.93e-12	99	132			EFEMP1	1.98829	7.29301	0.27263	4.42e-06	95	131
AGMAT	7.58406	1.34426	5.64179	1.77e-11	97	119			EFEMP2	0.135266	0.562983	0.240267	2.46e-10	73	127
AGPAT2	0.0891221	0.023867	3.73412	6.45e-06	60	42			EIF4E3	0.241382	0.701304	0.34419	3.24e-08	80	59
AGPAT3	1.64733	0.764968	2.15346	2.13e-08	99	125			ELN	0.0233253	0.0967937	0.240979	0.00916414	29	57
AGPAT5	0.70626	0.300743	2.34838	3.72e-08	98	123			EMILIN1	1.36071	3.03624	0.448157	0.0098204	98	132
AGPAT9	0.105508	0.0265559	3.97307	1.77e-07	56	30			EMILIN2	0.183854	0.56301	0.326556	4.77e-05	91	131
AGXT2	1.253	0.126207	9.92818	2.96e-10	78	62			EPX	0.0141324	0.136672	0.103404	0.0476337	28	49
AHSA1	2.75588	1.09578	2.515	3.68e-11	99	127			ERGIC3	0.113418	0.294531	0.385081	0.00895474	88	97
AIF1L	1.38983	0.276395	5.02841	5e-11	92	86			F10	0.177855	1.08668	0.163668	0.000204801	84	126
AIFM1	37.4346	7.61535	4.91567	9.24e-16	99	132			F11	0.0123274	0.0339247	0.363375	3.1e-06	28	75
AIG1	0.557463	0.17205	3.24011	4.56e-07	76	63			F13A1	3.77398	13.5724	0.278064	1.07e-12	99	133
AK2	25.0475	9.27043	2.70186	8.16e-11	99	132			F13B	0.0362508	0.191025	0.18977	1.01e-07	66	117
AK3	5.00872	1.43094	3.50029	4.13e-11	99	130			F2	3.45543	12.2883	0.281196	2.23e-14	99	133
AK9	0.0583595	0.0098479	5.92609	3.64e-11	60	26			F5	0.00499273	0.0397328	0.125658	7.79e-05	21	57
AKAP8	0.198354	0.0800984	2.47638	0.0104863	77	84			F7	0.000979495	0.0271343	0.0360981	9.23e-07	12	47
AKAP9	0.132638	0.0656563	2.02019	6.48e-11	99	124			FAP	0.0179375	0.0744839	0.240823	4.25e-13	8	67
AKR1C1	5.08613	0.797935	6.37411	1.11e-12	89	75			FBLN1	2.29215	4.9139	0.466462	2.06e-08	99	133
AKR1C3	11.9605	3.70952	3.22428	1.07e-15	99	133			FBLN2	0.574538	1.1996	0.478943	0.0116761	95	130
AKR7A2	16.6827	6.51213	2.56179	1.83e-18	99	133			FBLN5	4.70265	13.953	0.337035	0.0131729	96	130
AKR7A3	8.21081	2.69649	3.045	9.66e-10	98	118			FBLN7	0.00936343	0.0287432	0.325761	0.00786266	21	48
AKTIP	0.360565	0.124538	2.89521	3.7e-12	84	61			FBN1	1.92272	7.33861	0.262001	4.29e-10	99	133
ALDH1A1	317.702	115.651	2.74708	1.41e-17	99	133			FCGR2B	0.0368032	0.100207	0.367273	0.0060757	17	43
ALDH1B1	9.21535	1.02115	9.02446	4.26e-07	98	130			FCN2	0.00600838	0.0378759	0.158633	5.93e-06	16	53
ALDH1L1	6.80148	1.68748	4.03056	3.97e-14	98	107			FETUB	0.072822	0.245003	0.297229	0.000796553	71	112
ALDH1L2	0.709229	0.192542	3.68351	0.0059568	78	96			FGA	44.1685	503.258	0.087765	1e-20	99	133
ALDH2	24.4393	7.37468	3.31394	9.35e-12	99	131			FGB	143.788	1765.83	0.0814283	1.31e-21	99	133
ALDH4A1	16.1935	2.19201	7.38751	4.44e-11	99	128			FGG	59.6669	698.377	0.0854365	2.4e-18	99	133
ALDH5A1	1.76856	0.537253	3.29185	1.33e-10	99	124			FILIP1L	0.0103876	0.0215556	0.481896	0.000958323	32	73
ALDH6A1	42.754	4.91799	8.69339	5.59e-15	99	132			FMNL1	0.0936353	0.191989	0.487712	0.0132063	90	130
ALDH7A1	31.9702	10.4386	3.06268	4.69e-19	99	133			FMOD	0.805295	1.91116	0.421364	5.23e-07	74	127
ALDH8A1	1.40186	0.446658	3.13855	1.6e-07	87	83			FN1	14.1207	55.0556	0.256481	1.66e-15	99	133
ALDH9A1	10.4157	4.62641	2.25135	1.52e-18	99	133			FOLR2	0.587802	1.50531	0.390486	0.00351571	88	125
ALDOB	75.2884	6.2309	12.0831	0.00016338	94	117			FRZB	0.0348832	0.139155	0.25068	0.021759	25	48
ALG11	0.357085	0.144872	2.46483	1.02e-10	99	108			FSTL1	0.0500609	0.131432	0.380889	0.00200858	46	81
ALPL	1.64367	0.341576	4.81201	1.07e-08	90	95			FTL	39.0602	95.3985	0.409442	0.000184632	99	133
ALS2	0.0585898	0.00914421	6.40731	7.37e-08	60	35			GNL2	0.0274669	0.0595354	0.461353	0.00198174	67	62
AMDHD1	0.302763	0.0336155	9.00666	2.22e-19	84	47			HABP2	0.265964	0.582917	0.456263	0.015364	90	124
AMDHD2	0.708731	0.345331	2.05233	5.4e-09	99	126			HP	42.2107	117.05	0.36062	0.00240496	96	132
AMFR	0.0225249	0.00487609	4.61947	9.09e-06	42	21			HPX	87.4315	190.965	0.457839	6.1e-08	99	133
AMN	2.12617	0.403235	5.27277	4.73e-17	94	81			HRG	4.5523	9.53615	0.477373	4.75e-05	99	133
AMT	0.0827327	0.0262253	3.15469	0.00431825	35	26			HTRA1	0.117704	0.951821	0.123662	1.66e-07	69	119
ANAPC1	0.0407773	0.0151793	2.68637	2.02e-10	94	88			IFT27	0.414268	0.832455	0.497646	0.00416592	98	125
ANAPC2	0.0391713	0.0105747	3.70426	0.00586887	53	50			IGF2	0.0426731	0.17126	0.249172	0.000159291	35	77
ANGEL2	0.0307244	0.0145698	2.10878	9.26e-06	47	25			IGFALS	0.293609	0.822189	0.357107	0.00269999	95	131
ANK2	0.199745	0.0810717	2.46381	7.43e-06	91	100			IGFBP3	1.35438	5.0472	0.268342	0.00089192	91	131
ANK3	1.58505	0.449612	3.52538	1.77e-13	99	113			IGLL5	34.9033	168.207	0.207503	1.37e-11	99	133
ANKIB1	0.126551	0.025984	4.87034	5.54e-10	66	36			IL1RAP	0.0122514	0.0409256	0.299358	0.0161546	50	83
ANKMY2	0.100144	0.0431916	2.31859	2.2e-07	88	85			IL5RA	0.00885434	0.124473	0.0711348	0.00342311	21	46
ANKRD28	0.104519	0.0380093	2.74981	0.00944796	65	69			INHBC	0.0142324	0.0620642	0.229318	0.000469118	18	49
ANKS3	0.0681378	0.0272577	2.49976	1.35e-06	65	45			INHBE	0.0109166	0.0631338	0.172912	0.00128742	15	44
ANXA13	1.44363	0.675507	2.1371	2.54e-11	97	101			IRAK4	0.0346967	0.250259	0.138643	0.0342983	72	74
AOX1	0.879843	0.221889	3.96524	1.7e-06	84	87			ISLR	0.0301418	0.119966	0.251254	1.26e-05	35	80
AP1S1	1.30118	0.590659	2.20293	2.9e-07	98	124			ITGA11	0.0343277	0.153231	0.224025	6.63e-05	25	66
AP1S3	0.699965	0.254341	2.75207	0.000476978	75	75			ITGA2B	0.175065	0.734957	0.238198	0.0257652	74	109
AP2M1	5.54876	2.12949	2.60568	3.61e-09	99	133			ITGAM	0.231166	1.0975	0.210629	0.040962	98	132
AP4S1	0.0870218	0.0392793	2.21546	1.8e-05	63	48			ITIH2	7.32894	15.7309	0.465893	7.96e-05	99	133
AP5M1	0.0967128	0.0292443	3.30707	0.00076266	52	44			ITIH4	3.6786	7.47758	0.491951	6.25e-06	99	133
AP5Z1	0.0583182	0.0218908	2.66405	1.15e-05	89	95			KIAA0930	0.0181628	0.0520465	0.348973	0.000444793	67	55
APBB1	0.0358878	0.00467023	7.68438	8.37e-07	50	29			KNG1	4.48037	10.9894	0.4077	3.28e-09	99	133
APOA1BP	3.08667	1.51429	2.03836	4.78e-11	99	132			LBP	0.794846	2.425	0.327772	6.28e-07	98	133
APOO	4.51719	1.43754	3.14231	1.12e-10	99	124			LCAT	0.0143609	0.0401289	0.35787	0.00202746	26	59
APOOL	2.29848	1.07005	2.14802	2.6e-08	99	129			LEPREL2	0.00483071	0.0149474	0.323179	1.12e-05	15	52
APPL2	0.499438	0.23074	2.16451	1.08e-09	99	122			LEPREL4	0.0886232	0.187144	0.473558	0.0141939	39	74
AQP1	5.18212	1.25908	4.11579	0.00112215	61	59			LGALS9	0.0782223	0.208015	0.376042	0.00218526	48	88
ARF1	28.7957	10.9018	2.64137	2.32e-08	69	47			LOX	0.0621716	0.342088	0.181741	4.9e-07	30	80
ARFGAP3	0.212026	0.0859969	2.46551	4.92e-10	97	104			LOXL2	0.0820098	0.254162	0.322668	6.66e-05	82	124
ARHGAP12	0.0843969	0.0260023	3.24575	1.23e-05	60	43			LTBP1	0.126824	0.618654	0.205	3.94e-06	90	125
ARHGAP24	0.0698563	0.0216344	3.22895	2.51e-15	92	76			LTBP2	0.102909	0.450804	0.228279	2.24e-10	58	118
ARHGAP26	0.218022	0.0807838	2.69884	5.12e-05	78	79			LTBP3	0.0109325	0.0635514	0.172026	5.7e-11	37	99
ARHGAP31	0.0177655	0.00610947	2.90785	0.017279	41	37			LTBP4	0.181459	0.635389	0.285587	4.19e-05	73	115
ARHGAP35	0.138922	0.0548688	2.5319	1.48e-11	99	118			LTF	1.61124	32.6577	0.0493374	0.00430589	98	133
ARHGAP5	0.0531999	0.0230546	2.30756	1.25e-08	90	87			LUM	137.262	363.788	0.377314	7.2e-05	99	133
ARHGEF10L	0.208747	0.0668707	3.12165	4.75e-12	95	93			MASP1	0.0239092	0.0717031	0.333447	0.000863977	18	52
ARHGEF12	0.304858	0.136928	2.22641	1.74e-09	99	126			MASP2	0.0261528	0.059574	0.438997	1.36e-06	16	59
ARHGEF16	0.416076	0.158741	2.62111	1.5e-09	92	93			MBL2	0.0105864	0.0642909	0.164663	0.000260707	14	44
ARHGEF37	0.174244	0.0720423	2.41863	4.22e-12	88	71			MFSD1	0.0611882	0.179808	0.340298	0.0410945	36	63
ARHGEF40	0.0528193	0.0225726	2.33997	3.33e-05	78	77			MICAL2	0.00213939	0.0232917	0.0918524	8.48e-05	19	54
ARID1B	0.0103764	0.00361429	2.87093	7.81e-07	63	43			MMP2	0.034064	0.0704935	0.483222	0.000308506	45	89
ARL14EP	0.0252459	0.0088703	2.84611	4.78e-05	45	28			MMP9	0.0349889	0.379948	0.0920887	0.000682448	69	110
ARL3	5.28307	1.83221	2.88344	1.55e-11	99	130			MMRN1	0.0619613	0.162956	0.380233	7.53e-09	42	104
ARL6	0.213929	0.0886171	2.41408	5.96e-10	74	46			MPO	0.473593	10.8984	0.0434554	0.0287412	99	132
ARL6IP1	0.480657	0.152683	3.14806	6.57e-11	83	64			MS4A6A	0.0291467	0.100732	0.289348	1.74e-05	37	83
ARL6IP4	1.03162	0.261949	3.93826	6.58e-09	83	69			MSR1	0.0820544	0.206305	0.397733	0.0113352	80	120
ARL8A	2.84713	1.41385	2.01374	0.00080233	79	83			MST1	0.104034	0.283156	0.367408	0.0262343	72	103
ARMC1	0.588846	0.211019	2.79049	5.31e-10	98	110			MVK	0.529476	1.13507	0.466469	5.39e-10	98	98
ARSB	0.359531	0.149755	2.40079	3.27e-10	99	119			MXRA5	0.0342933	0.190556	0.179965	3.16e-08	55	110
ARSE	0.502151	0.209516	2.39671	2.69e-09	98	114			MXRA8	0.0127315	0.0419198	0.303711	0.000540068	17	50
AS3MT	0.233548	0.070165	3.32856	1.6e-06	81	78			MYO1F	0.151233	0.316705	0.477519	0.026644	94	131
ASAH1	19.4261	6.21233	3.12702	2.79e-10	99	132			MZB1	0.575665	14.987	0.0384109	0.000303271	75	117
ASB9	0.271952	0.0244265	11.1335	2.04e-07	54	31			NAIP	0.0197854	0.182991	0.108122	0.0446015	34	59
ASPA	2.25878	0.772364	2.9245	1.06e-11	98	112			NAT14	0.0223312	0.048508	0.460362	0.0352419	30	57
ASPDH	1.2409	0.167648	7.40181	2.67e-07	54	28			NBEAL1	0.010723	0.0251835	0.425795	7.79e-06	81	72
ASPG	0.35181	0.137319	2.56198	6.62e-05	53	37			NDST1	0.00327596	0.00903684	0.362512	0.00239324	37	23
ASPSCR1	0.245056	0.115661	2.11875	5.47e-09	96	106			NEB	0.0026996	0.0109188	0.247243	0.0281737	23	43
ASRGL1	3.70193	0.789369	4.68973	3.67e-16	98	100			NIP7	0.12985	0.288041	0.450804	0.0386204	42	37
ASS1	14.664	1.5224	9.63214	2.25e-07	99	131			OAF	0.0266138	0.15348	0.173403	0.024387	42	70
ASUN	0.171469	0.0716659	2.39261	1.33e-06	97	116			OLFM4	0.0168916	0.621982	0.0271577	9.63e-06	12	46
ATG2B	0.00660293	0.00161399	4.09107	4.74e-10	60	27			OLFML1	0.422887	0.90285	0.468391	1.4e-05	69	119
ATL2	2.26511	0.681509	3.32367	3.04e-10	94	86			OLFML3	0.3983	0.881447	0.451871	4.87e-06	77	126
ATP1A1	12.927	5.38941	2.39859	1.85e-08	99	133			ORM1	93.0826	293.178	0.317495	2.28e-09	99	133
ATP1B1	14.3407	5.26348	2.72458	6e-10	99	132			ORM2	18.5588	72.7816	0.254993	8.25e-10	99	133
ATP2B2	0.0541512	0.0195095	2.77564	0.00725237	52	47			OTUD7B	0.0210289	0.112302	0.187253	2.84e-09	83	64
ATP5A1	241.542	64.3387	3.75422	4.35e-15	99	133			PCOLCE	1.75483	4.1092	0.427051	4.83e-08	63	120
ATP5B	400.42	111.132	3.6031	8.15e-18	99	133			PGLYRP2	0.781798	2.37645	0.328977	0.00042456	99	133
ATP5C1	27.6262	7.17665	3.84945	2.85e-12	99	132			PLG	4.97226	24.1506	0.205886	1.53e-11	99	133
ATP5D	10.9686	1.9849	5.52599	1.31e-10	99	120			PLTP	0.255958	1.81185	0.141269	1.06e-08	69	122
ATP5F1	14.969	4.89021	3.06101	3.56e-15	99	133			PON1	1.11759	4.53665	0.246346	6.76e-06	99	133
ATP5H	20.472	8.42115	2.43102	1.68e-08	99	132			POSTN	26.4659	100.405	0.26359	4.2e-08	99	133
ATP5I	68.7921	14.2339	4.83298	1.21e-10	99	132			PRELP	17.7762	48.4186	0.367137	0.000575711	98	132
ATP5J	21.9813	7.01097	3.13527	3.5e-13	99	132			PSME4	0.00580798	0.0163715	0.354762	0.0108352	60	52
ATP5J2	58.1025	20.2522	2.86894	0.000361315	94	117			PTGIS	0.0692056	0.317818	0.217752	7.53e-06	44	90
ATP5L	34.1449	7.02144	4.86295	2.18e-10	99	131			PTX3	0.149995	0.347759	0.431318	0.000116779	49	96
ATP5O	55.2386	12.477	4.42722	2.82e-11	99	131			QSOX1	0.103556	0.89243	0.116039	3.95e-09	80	128
ATP5S	0.169612	0.0296508	5.72032	8.97e-17	88	57			RABL5	0.056953	0.156899	0.362991	0.00476073	44	34
ATP6	7.44577	2.01745	3.69069	5.19e-09	97	104			RCN3	0.305441	0.713386	0.428156	0.000133075	78	123
ATP6V0A1	1.67265	0.81453	2.05351	6.12e-09	99	130			RNASE3	0.0219675	1.32864	0.0165338	2.02e-08	11	54
ATP6V0A2	0.0536768	0.0255892	2.09763	0.0151942	49	46			RNASEH2B	0.0147902	0.0318823	0.4639	0.000158532	46	28
ATP6V1A	7.34899	3.11753	2.35731	1e-15	99	133			RTN2	0.0414251	0.102343	0.404766	0.0161297	31	60
ATP6V1B2	7.43725	2.82923	2.62872	4.58e-18	99	133			RUNX1	0.0616245	0.203167	0.30332	0.0166661	26	55
ATP6V1D	2.29449	0.525729	4.3644	1.04e-13	99	115			SAA1	0.0706855	9.25832	0.0076348	1.79e-06	23	64
ATP6V1E1	8.16322	3.04526	2.68063	2.56e-15	99	133			SDC2	0.0248552	0.0802086	0.309881	0.0344515	33	29
ATP6V1H	1.52363	0.750306	2.03067	8.69e-12	99	133			SEC11C	0.476875	0.994713	0.479409	0.000227895	99	116
ATP8	2.66169	0.611491	4.35279	1.69e-05	62	47			SERPINA1	169.747	344.703	0.492443	5.98e-06	99	133
ATP9B	0.0100257	0.00170955	5.8645	5.35e-06	45	26			SERPINA3	15.2569	55.8187	0.273329	1.04e-07	98	133
ATPAF1	2.46347	0.843655	2.92	8.65e-13	99	117			SERPINA4	1.26709	2.60462	0.486478	0.000287979	97	133
ATPAF2	0.724248	0.319959	2.26357	1.13e-09	96	104			SERPINE1	0.0833073	1.1492	0.0724913	8.08e-09	17	67
ATPIF1	5.53083	0.740317	7.4709	2.03e-09	86	83			SERPINF1	2.66956	7.31982	0.364703	6.4e-06	99	133
ATXN3	0.153304	0.0609114	2.51683	0.000222144	84	92			SERPINF2	1.14926	4.38358	0.262173	1.76e-06	99	133
AUH	2.38926	0.52473	4.55331	1.84e-15	99	103			SERPING1	6.80956	17.1333	0.397446	2.39e-06	99	133
AUP1	0.368308	0.157317	2.34119	1.03e-06	97	121			SIGLEC1	0.0241476	0.0742355	0.325283	0.00143261	68	111
AZGP1	36.6464	6.73624	5.44018	0.020377	99	133			SLC2A3	0.252928	0.935513	0.270363	0.0335525	81	118
AZI2	0.0141664	0.00468541	3.0235	0.000175405	42	27			SLC4A2	0.0905551	0.535326	0.169159	0.0175705	74	77
B2M	32.6338	15.119	2.15846	5.25e-07	99	132			SLC7A5	0.0163375	0.0369684	0.441931	0.0110722	18	43
B3GALTL	0.102711	0.031554	3.25509	7.31e-09	81	65			SLFN12L	0.0348505	0.0754529	0.461884	0.00716763	29	59
B3GNT1	0.134115	0.0481843	2.78337	0.00127032	64	62			SLPI	0.0322429	0.0935232	0.344758	0.000608842	14	44
B9D1	0.078271	0.0220418	3.55103	2.4e-05	46	27			SQSTM1	0.38769	1.57058	0.246846	1.43e-05	94	109
BAD	0.24646	0.109703	2.2466	4.51e-05	89	98			SRPX2	0.124897	0.722655	0.17283	3.17e-08	52	108
BAG1	0.23927	0.0997965	2.39758	3.4e-10	93	89			SSC5D	0.00461414	0.0355368	0.129841	3.19e-06	19	63
BAG3	1.86633	0.781557	2.38796	2.4e-09	99	131			SULF1	0.218705	0.534582	0.409114	0.000458446	17	47
BAG6	0.794218	0.390918	2.03167	3.34e-08	99	131			TBC1D10B	0.0520978	0.139642	0.37308	0.00836121	81	89
BAIAP2	0.255215	0.0941923	2.70951	1.14e-07	93	95			TF	189.831	382.524	0.49626	1.81e-05	99	133
BBOX1	10.5099	2.76634	3.79919	2.32e-12	97	110			TGFB2	0.0191	0.0395422	0.483028	0.0213344	19	42
BBS1	0.0510345	0.0162968	3.13157	1.01e-07	67	46			TGFBI	44.7531	164.858	0.271464	2.58e-09	99	133
BBS2	0.0233797	0.00456429	5.12231	7.48e-12	70	38			THBS2	0.331334	2.25627	0.14685	1.46e-09	66	122
BCAP31	9.25624	4.4085	2.09963	5.12e-08	99	132			THBS3	0.0473889	0.184359	0.257047	4.81e-09	39	100
BCKDHA	1.62439	0.486637	3.33799	8.2e-12	99	125			TIMP1	0.505587	2.01754	0.250596	0.000880487	85	124
BCKDHB	2.88699	1.05845	2.72756	1.49e-07	98	127			TNC	6.84421	24.7996	0.27598	5.13e-08	99	133
BCL2L1	0.514983	0.224581	2.29308	4.35e-06	96	120			TNXB	0.296054	0.734016	0.403334	0.0259973	96	125
BCL2L13	2.06043	0.806602	2.55446	4.41e-08	99	125			TUBB1	0.235712	0.614333	0.383688	0.0434625	27	51
BCLAF1	1.09824	0.418524	2.62408	0.000235684	97	125			VCAN	2.56055	8.61176	0.297332	0.000115082	97	132
BCR	0.0425672	0.0131493	3.23721	2e-08	74	57			VMA21	0.223402	1.02322	0.218332	0.0195377	67	102
BDH1	2.26745	0.876875	2.58584	0.000362152	78	80			VNN1	0.159517	0.567163	0.281254	0.00909515	32	65
BDH2	12.9025	3.91207	3.29812	8.1e-17	99	132			VNN2	0.0189524	0.166564	0.113785	4.95e-07	20	65
BHMT	104.58	23.1857	4.51054	7.2e-06	97	131			VPS54	0.00681353	0.0149614	0.455407	6.78e-05	55	36
BHMT2	12.0411	2.09001	5.76128	1.89e-11	98	113			VSIG4	0.02806	0.16429	0.170796	1.43e-07	15	57
BIN1	1.33909	0.615597	2.17527	2.35e-08	99	128			VTN	16.8398	106.108	0.158703	1.96e-12	99	133
BIN3	0.128094	0.0374913	3.41664	9.2e-16	87	59			WASL	0.296607	0.602391	0.492383	3.16e-06	99	119
BIRC6	0.0456709	0.0142471	3.20562	3.41e-10	97	106			ZCCHC8	0.249321	1.01206	0.24635	0.000984099	98	112
BLOC1S1	1.47224	0.653253	2.2537	1.32e-09	99	122
BLOC1S4	0.316865	0.122633	2.58385	0.000607962	83	92
BLOC1S5	0.756143	0.270478	2.79558	1.3e-11	95	88
BLOC1S6	1.83356	0.784655	2.33677	6.05e-07	85	81
BOLA1	0.159618	0.0514007	3.10536	2.08e-09	63	34
BOLA3	0.149493	0.062422	2.39487	5.53e-06	51	31
BPHL	4.11607	0.701074	5.87109	6.66e-15	99	120
BRAF	0.0887665	0.0342813	2.58936	3.43e-07	71	52
BRD4	0.156698	0.0662023	2.36695	0.00490984	82	93
BRD8	0.0236225	0.00794947	2.97158	3.08e-07	66	45
BRD9	0.00448	0.00178925	2.50385	0.000729873	47	36
BRMS1L	0.0116033	0.0052906	2.1932	3.49e-05	46	28
BSDC1	0.0363744	0.0107259	3.39126	3.65e-08	62	38
BTNL9	0.189525	0.0369787	5.12525	0.00155178	38	26
C10orf32	0.530772	0.230515	2.30254	1.33e-09	89	79
C10orf35	0.147761	0.073795	2.00231	0.00628943	46	39
C10orf76	0.142693	0.0655524	2.17678	1.88e-05	89	96
C11orf54	7.96607	2.85279	2.79238	1.75e-11	99	127
C12orf29	0.119306	0.0100707	11.8469	0.00065718	36	23
C12orf4	0.0369407	0.0133866	2.75953	4.4e-06	66	51
C14orf159	2.42351	0.653076	3.71092	7.07e-10	99	124
C14orf169	0.0588154	0.0173305	3.39376	1.44e-06	67	48
C14orf2	5.43133	1.15576	4.69935	3.53e-11	96	98
C16orf58	0.754651	0.363545	2.07581	0.0156907	87	106
C16orf70	0.181665	0.0754726	2.40703	0.000196025	66	58
C16orf91	0.0503018	0.0204515	2.45957	1.77e-06	51	28
C17orf80	0.0270997	0.00927835	2.92075	2.82e-06	52	31
C19orf12	0.233222	0.10613	2.19752	0.0005811	64	59
C19orf25	0.161632	0.0800544	2.01902	4.52e-08	87	80
C19orf52	0.0892551	0.0270256	3.30261	2.63e-05	64	52
C19orf70	2.36241	0.634876	3.72106	1.65e-08	97	116
C19orf77	0.221461	0.0443594	4.99242	2.77e-06	47	23
C1orf50	0.296246	0.11629	2.54747	3.11e-09	84	65
C1QBP	19.3051	8.1399	2.37166	7.62e-06	99	131
C21orf33	8.1797	2.77897	2.94342	1.81e-11	99	131
C21orf59	0.0342773	0.0134708	2.54456	0.0299785	44	41
C2CD5	0.138205	0.0588349	2.34903	2.06e-12	99	109
C2orf47	0.706397	0.274105	2.5771	4.87e-10	99	123
C2orf76	0.0276543	0.0115855	2.38698	6.98e-07	51	26
C4orf27	0.172507	0.023562	7.32144	0.00862577	36	29
C4orf33	0.205172	0.0861038	2.38285	9.25e-05	75	72
C6orf89	0.0722045	0.0186447	3.87265	0.000206574	44	28
C7orf10	0.379545	0.0398856	9.51584	4.24e-20	91	64
C7orf41	0.0798827	0.0133509	5.98332	2.55e-07	50	26
C8orf82	0.657474	0.272062	2.41663	4.42e-11	98	110
CA2	42.166	19.0412	2.21446	9.48e-09	99	133
CABLES1	0.0407974	0.0151603	2.69107	1.28e-06	45	21
CACNG6	0.0908425	0.0408815	2.22209	1.33e-08	58	29
CAMSAP2	0.015094	0.00365008	4.13527	8.57e-06	48	27
CAMSAP3	0.0176744	0.00834414	2.11819	1.44e-12	72	36
CAP2	1.20273	0.530609	2.2667	1.08e-09	99	121
CAPN5	0.155205	0.0539684	2.87585	7.4e-10	90	83
CARKD	1.1578	0.506329	2.28666	1.01e-10	99	123
CBLB	0.0345607	0.017243	2.00433	0.007709	68	71
CBR1	64.6044	30.9507	2.08733	3.56e-17	99	133
CBR3	9.60884	3.57059	2.69111	0.00601565	88	110
CBR4	3.89645	1.49635	2.60397	3.54e-12	99	110
CC2D1B	0.953883	0.413782	2.30528	7.3e-07	96	114
CCBL1	0.158888	0.0518229	3.06599	2.39e-14	93	79
CCBL2	0.342493	0.11982	2.85839	2.56e-05	90	104
CCDC104	0.0385042	0.0101968	3.77612	4.02e-07	57	36
CCDC115	1.98414	0.830129	2.39016	0.00203592	85	98
CCDC22	2.1364	0.794831	2.68786	1.12e-10	99	131
CCDC25	0.696016	0.265371	2.6228	2.52e-10	90	80
CCDC28A	0.0582431	0.0196695	2.96108	3.22e-09	72	48
CCDC51	0.147365	0.0166492	8.85118	9.88e-07	58	39
CCDC53	0.205876	0.0925989	2.22331	7.24e-05	77	78
CCDC58	3.58431	1.58826	2.25675	4.92e-08	99	124
CCDC69	0.0278042	0.00883782	3.14605	3.28e-05	47	30
CCDC86	0.103745	0.035681	2.90758	0.000123375	51	36
CCDC93	0.569992	0.265606	2.14601	1.73e-07	98	122
CCND1	0.179925	0.0780471	2.30534	8.66e-06	70	57
CCNYL1	0.0345621	0.0116344	2.97067	0.0062404	34	25
CD46	0.459151	0.175301	2.61922	2.6e-11	98	106
CD48	0.535122	0.177992	3.00643	0.000639324	68	64
CDC16	0.578722	0.215338	2.68751	1.11e-05	99	120
CDC42SE2	0.205835	0.0528958	3.89133	5.17e-05	53	39
CDC73	0.376278	0.165521	2.2733	1.06e-09	99	110
CDH1	0.670436	0.163473	4.1012	1.16e-10	96	110
CDH16	1.85047	0.277495	6.66851	7.64e-11	98	106
CDHR2	0.22988	0.085244	2.69673	3.96e-05	66	58
CDHR5	0.15715	0.0401025	3.91872	2.05e-08	72	50
CDK2	0.591785	0.0211974	27.9178	0.000513556	63	57
CDK7	0.0266691	0.0117759	2.26472	2.69e-06	55	34
CECR5	0.52859	0.2162	2.44491	1.77e-09	99	122
CELF1	0.441815	0.210746	2.09643	1.64e-09	99	119
CELF4	0.11126	0.0168251	6.61273	0.00915917	45	39
CENPV	0.492947	0.189213	2.60525	4.54e-12	92	82
CEP135	0.0362072	0.00816135	4.43642	0.00129132	48	37
CEP290	0.00665919	0.00329797	2.01918	0.0121588	43	40
CEP44	0.0761063	0.0260055	2.92655	0.000502985	57	50
CEP97	0.0085095	0.00308797	2.75569	0.000858165	45	33
CES2	8.26985	3.81387	2.16836	8.75e-07	98	124
CETN3	0.0158413	0.0060206	2.63118	2.72e-05	40	19
CGN	0.0276984	0.0106418	2.60279	5.82e-08	55	27
CHCHD4	0.36536	0.133781	2.73104	3.04e-06	71	58
CHCHD5	0.639115	0.274944	2.32452	0.000676528	72	74
CHCHD6	0.322262	0.105313	3.06003	4.81e-07	78	68
CHDH	4.15045	1.00976	4.11034	4.7e-12	99	119
CHID1	2.55226	1.17649	2.1694	1.16e-07	99	131
CHKB	0.151568	0.0684582	2.21402	5.05e-08	95	99
CHMP1A	0.348042	0.172352	2.01936	4.32e-10	93	88
CHMP1B	0.395193	0.0864855	4.56947	7.6e-10	59	26
CHMP3	0.725858	0.290393	2.49957	5.8e-07	74	61
CHMP6	0.600883	0.275607	2.18022	2.34e-08	97	109
CISD1	36.7009	13.3005	2.75936	1.42e-07	99	130
CKB	18.0246	4.27286	4.2184	8.43e-05	99	128
CLCN3	0.402966	0.194999	2.06651	3.01e-07	67	51
CLCN7	0.119669	0.0376671	3.17703	3.18e-06	72	61
CLDN2	0.190406	0.0902969	2.10867	2.18e-12	86	64
CLDN3	0.46264	0.22972	2.01393	7.32e-10	82	62
CLIC2	2.5302	1.16025	2.18074	4.62e-05	99	127
CLIC5	0.801623	0.215266	3.72386	0.00293673	40	29
CLNS1A	1.28779	0.61023	2.11033	2.94e-09	99	122
CLPTM1	1.20655	0.191877	6.28812	2.75e-06	84	83
CLPX	1.07574	0.349621	3.07686	3.47e-12	99	121
CLYBL	4.30485	1.45192	2.96493	8.48e-11	99	122
CMBL	20.3827	6.6898	3.04683	9.71e-17	99	130
CMC1	1.57481	0.510727	3.08346	0.000219697	73	69
CMC2	0.379952	0.100997	3.76203	0.00367687	54	49
CMC4	0.323831	0.16061	2.01626	0.00473929	65	63
CMIP	0.0694745	0.0263955	2.63206	0.00018077	61	53
CNDP2	364.574	147.382	2.47367	4.41e-18	99	133
CNKSR3	0.033727	0.00868181	3.88479	9.07e-12	62	25
CNOT11	0.0685841	0.0194696	3.52262	0.00313951	66	67
CNOT2	0.0365435	0.0164911	2.21596	3.88e-06	68	52
CNRIP1	0.289538	0.128986	2.24473	0.00010609	82	84
COA3	2.97574	0.747239	3.98231	1.93e-05	90	99
COA4	0.393976	0.065871	5.98102	7.67e-15	80	49
COASY	1.1077	0.473948	2.33718	1.34e-12	99	131
COBLL1	0.136297	0.0257465	5.2938	6.94e-11	89	84
COG2	0.166186	0.0754278	2.20324	9.44e-10	98	113
COG4	0.327842	0.133002	2.46495	3.91e-09	99	120
COL4A3BP	0.547048	0.265528	2.06022	1.78e-09	98	117
COLGALT2	0.0292721	0.0126813	2.30829	0.0440397	35	32
COMMD1	0.248959	0.110887	2.24516	2.57e-11	94	87
COMMD3	1.80266	0.763726	2.36035	3.52e-09	99	125
COMMD5	0.8819	0.413642	2.13204	1.18e-09	99	122
COMMD7	0.248653	0.103627	2.3995	2.1e-13	98	98
COMTD1	0.111935	0.0450039	2.48724	0.00621142	38	31
COPS5	2.5268	1.17914	2.14292	1.39e-11	99	131
COPS8	1.60837	0.803617	2.00141	3.57e-06	98	128
COQ10B	0.554472	0.0825348	6.71804	9.08e-07	73	60
COQ5	1.15202	0.489637	2.35281	2.11e-10	99	116
COQ6	0.819333	0.18355	4.46381	7.02e-14	95	87
COQ7	1.56076	0.564348	2.7656	2.06e-08	79	68
COQ9	1.36061	0.334737	4.0647	1.03e-11	99	118
COX1	0.594398	0.0884424	6.72074	1.87e-10	87	79
COX15	0.223703	0.0966886	2.31365	2.53e-09	95	94
COX17	0.501826	0.179404	2.79718	0.000353768	56	42
COX2	56.2555	9.03592	6.22576	8.97e-10	99	133
COX3	0.769379	0.108779	7.07286	2.84e-06	60	43
COX4I1	27.8089	7.08174	3.92684	8.53e-09	99	132
COX5A	19.9441	2.7117	7.35482	4.72e-14	99	132
COX5B	53.7752	11.5086	4.6726	1.87e-08	99	132
COX6A1	2.81845	0.795879	3.5413	1.5e-08	83	68
COX6B1	46.2875	9.50396	4.87034	8.66e-09	99	132
COX6C	5.15976	0.545005	9.46737	1.03e-13	93	83
COX7A2	46.8607	9.6159	4.87325	2.28e-06	99	132
COX7A2L	5.38212	1.94457	2.76777	0.00767943	77	89
COX8A	7.18898	0.196203	36.6406	4.33e-11	71	44
CPEB4	0.0268683	0.00466075	5.7648	7.52e-08	53	25
CPQ	0.915767	0.28418	3.22248	5.67e-08	99	125
CPT1A	1.15137	0.565358	2.03653	9.1e-09	99	131
CPT2	7.01655	2.29899	3.05202	3.18e-14	99	129
CRAT	1.44001	0.579233	2.48606	1.22e-09	99	129
CRBN	0.052477	0.024458	2.14559	8.65e-05	47	31
CRTC3	0.0119938	0.00573977	2.0896	0.00379307	50	44
CRYAB	645.594	139.53	4.62693	1.04e-20	99	133
CRYL1	41.0948	13.2317	3.10579	1.86e-17	99	132
CRYM	2.75682	0.741595	3.71742	5.16e-15	98	101
CRYZ	114.469	45.2145	2.5317	1.35e-19	99	133
CRYZL1	0.311003	0.149142	2.08529	2.57e-09	96	107
CS	17.0079	6.73127	2.52669	2.74e-09	99	132
CSNK1A1	2.6027	0.440662	5.90633	4.81e-07	98	116
CTH	0.330807	0.0825805	4.00587	7.96e-08	81	72
CTNNA2	0.585463	0.159889	3.66168	9.48e-06	55	39
CTSD	144.111	63.13	2.28277	3.35e-08	99	133
CTSF	0.0627735	0.0150714	4.16507	1.27e-05	51	33
CTSH	0.749208	0.279144	2.68395	2.79e-10	98	107
CUBN	3.11314	1.00006	3.11296	3.54e-11	97	112
CYB5A	118.951	44.5746	2.66858	5.86e-11	99	131
CYC1	6.04267	1.68493	3.5863	1.49e-07	99	131
CYCS	42.9475	11.4235	3.75958	1.4e-05	99	132
CYP27A1	0.751472	0.267177	2.81264	5.43e-08	98	117
CYP4F11	0.091736	0.0325608	2.81737	0.00103999	53	44
CYP51A1	0.0729043	0.0300753	2.42406	2.16e-07	76	61
CYP7B1	0.0954189	0.0328104	2.90819	0.0194671	62	65
CYSTM1	0.635484	0.252483	2.51694	3.57e-06	72	61
CYTB	1.14293	0.365147	3.13004	1.66e-06	96	114
D2HGDH	0.255095	0.0685327	3.72223	3.81e-11	92	88
DAB2	4.1585	1.7032	2.44158	5.7e-11	99	131
DAK	5.90496	1.68956	3.49497	1.41e-15	99	132
DAP	0.15037	0.042638	3.52667	4.33e-17	84	47
DAP3	0.84783	0.278324	3.0462	2.98e-10	99	120
DAPK1	0.0445422	0.0156802	2.84066	0.00012613	71	66
DARS2	2.98529	1.41389	2.11141	3.74e-07	99	130
DBI	131.602	50.0331	2.6303	3.71e-07	99	132
DBT	1.61503	0.469219	3.44196	1.25e-11	99	126
DCAF11	0.0486799	0.00462601	10.5231	8.5e-09	48	17
DCAF13	0.0490129	0.0152885	3.20587	1.53e-06	51	26
DCAF8	2.00356	0.58337	3.43445	6.05e-13	98	106
DCP1A	0.164902	0.0778042	2.11945	8.3e-06	86	87
DCTN3	0.962407	0.468234	2.0554	8.38e-09	99	115
DCTN4	1.51621	0.709669	2.13649	1.36e-09	99	119
DCTN5	0.658583	0.267364	2.46324	9.61e-05	83	88
DCUN1D5	0.0279499	0.0112171	2.49173	1.02e-06	65	46
DCXR	5.78003	0.901401	6.41227	8.59e-10	99	129
DDAH1	29.9579	10.0769	2.97293	1.07e-16	99	132
DDB2	0.763785	0.292758	2.60893	1.03e-05	94	113
DDC	4.86664	0.692113	7.03157	2.42e-15	96	96
DDHD2	0.092144	0.0335477	2.74665	2.69e-14	93	78
DDO	0.185921	0.017498	10.6253	5.83e-12	65	30
DDT	56.1405	22.9199	2.44942	1.08e-18	99	133
DDX10	0.0641929	0.026583	2.41481	0.000667192	49	39
DDX19A	0.341686	0.149849	2.2802	0.00177328	51	43
DDX31	0.0747553	0.0236757	3.15747	1.18e-07	72	56
DDX54	0.851813	0.366892	2.3217	6.24e-09	94	94
DECR1	16.9607	4.8669	3.48491	3.25e-09	99	132
DECR2	2.22836	0.515785	4.32032	1.51e-13	99	116
DENND4C	0.256898	0.0694105	3.70114	9.79e-10	98	113
DGUOK	0.118039	0.0500231	2.35968	0.00114684	56	46
DHODH	0.695054	0.254553	2.73049	8.36e-10	98	114
DHRS11	0.422726	0.0747565	5.6547	7.08e-10	84	72
DHRS3	1.67762	0.611801	2.74211	5.11e-12	95	97
DHRS4	1.37341	0.203877	6.73643	0.00215347	41	34
DHTKD1	0.853569	0.299364	2.85127	6.3e-16	99	113
DHX29	0.178161	0.0831741	2.14202	1.72e-09	98	108
DHX36	0.34944	0.132988	2.6276	3.69e-05	92	100
DHX37	0.0473077	0.0231678	2.04196	0.000536973	73	71
DHX40	0.0102764	0.00296902	3.46119	4.89e-09	63	35
DHX57	0.0185099	0.00763256	2.42512	4.53e-05	81	80
DICER1	0.021122	0.0103362	2.04351	7.35e-05	71	62
DIP2A	0.0611768	0.0170822	3.58132	4.9e-13	89	70
DIP2B	0.10659	0.0511932	2.08211	7.09e-08	97	113
DIP2C	0.0638894	0.0171811	3.7186	1.5e-11	84	65
DIS3L2	0.107701	0.031221	3.44965	2.78e-08	96	104
DLAT	5.43284	1.39877	3.88401	5.2e-13	99	132
DLD	11.6126	4.4585	2.6046	2.05e-10	99	132
DLG3	0.188665	0.0756225	2.49482	1.16e-16	97	84
DLST	16.0437	5.00172	3.20763	1.68e-09	99	132
DMGDH	3.76098	1.36537	2.75455	1.45e-10	98	117
DMXL1	0.0850518	0.0288413	2.94896	5.05e-14	96	94
DMXL2	0.0270486	0.00900541	3.00359	0.000318158	58	51
DNAJA2	2.08752	1.01803	2.05055	6.74e-11	99	131
DNAJA3	0.896363	0.428781	2.09049	6.03e-07	99	127
DNAJB14	0.0221231	0.00955308	2.31581	0.000677378	40	27
DNAJC11	2.21132	0.839863	2.63296	1.08e-08	99	124
DNAJC17	0.478131	0.224676	2.12809	2.13e-05	84	82
DNAJC21	0.0708659	0.0343844	2.06099	0.00409074	57	51
DNMBP	0.0704167	0.0175109	4.0213	0.00199299	54	48
DNPEP	3.31529	1.59671	2.07633	2.52e-12	99	132
DNPH1	17.8904	5.85126	3.05752	1.72e-15	99	131
DNTTIP2	0.0398176	0.0182763	2.17864	0.00190019	55	48
DOCK6	0.372994	0.162222	2.29928	4.75e-06	98	119
DPAGT1	0.0508931	0.0224231	2.26968	1.8e-07	77	66
DPM3	0.327446	0.12547	2.60976	0.000126217	41	24
DPP4	13.8404	4.68371	2.95501	4.08e-13	99	132
DPP8	0.0482775	0.013499	3.57637	0.00253266	52	46
DPYS	3.8213	0.953388	4.00813	2.48e-12	98	107
DSC2	0.0498999	0.0116638	4.2782	0.000252575	40	25
DSCR3	0.941323	0.429104	2.1937	2.08e-08	99	123
DTNA	0.0873861	0.0292332	2.98927	0.0124007	37	31
DTNB	0.149107	0.0529581	2.81556	5.95e-10	92	90
DYNC2H1	0.0565514	0.0130427	4.33586	8.58e-10	90	85
DYNC2LI1	0.0232872	0.00387301	6.01268	4.63e-10	46	12
DYNLT1	1.59022	0.618669	2.57039	0.00107289	86	95
EARS2	0.476373	0.148564	3.20652	3.77e-12	96	92
ECH1	53.8488	18.3582	2.93323	6.48e-18	99	133
ECHDC2	1.72058	0.313693	5.4849	1.7e-17	97	92
ECHDC3	6.22755	1.92595	3.2335	1.09e-12	99	121
ECHS1	51.9983	13.2183	3.9338	9.17e-16	99	133
ECI1	18.0244	4.43001	4.06871	7.82e-15	99	132
ECI2	5.51054	1.78941	3.07953	1.91e-11	99	130
ECSIT	0.518858	0.187264	2.77073	1.34e-10	84	63
EDC3	0.0566578	0.0261344	2.16794	3.29e-06	77	65
EDF1	0.759701	0.364047	2.08682	2.39e-08	94	97
EEF1E1	4.70256	1.9286	2.43833	4.71e-11	99	130
EFCAB7	0.0120712	0.00188985	6.38739	2.44e-07	44	18
EFNB2	0.028101	0.00839684	3.34662	0.0177816	39	35
EFTUD1	0.34211	0.141291	2.42132	2.84e-10	99	123
EGLN1	0.365724	0.168327	2.1727	5.43e-05	92	109
EHHADH	10.0004	3.20615	3.11912	6.91e-16	99	132
EIF2AK4	0.0553344	0.00789278	7.01077	0.00217825	58	49
EIF2B3	0.660586	0.32662	2.02249	4.03e-07	99	122
EIF2D	0.345872	0.17214	2.00925	1.85e-09	94	89
EIF4EBP2	0.108278	0.036236	2.98813	3.71e-09	69	44
EIF4EBP3	0.120322	0.0419165	2.87053	0.000182379	48	34
ELF1	0.0506585	0.0100647	5.03326	9.26e-06	50	32
ELMO3	0.163011	0.0710226	2.2952	4.34e-09	92	93
ELOF1	0.579439	0.256621	2.25796	6.23e-10	80	59
ELOVL7	0.229746	0.0768858	2.98815	1.13e-18	92	62
ELP5	0.0460688	0.017817	2.58567	0.000659361	48	37
EMC10	0.181027	0.0703507	2.5732	3.99e-07	85	79
EMD	1.34709	0.636831	2.1153	2.58e-07	99	125
EML2	1.31683	0.550949	2.39012	8.17e-13	99	133
EML4	2.93928	1.43799	2.04402	3.09e-09	99	132
ENDOG	0.169235	0.0505783	3.346	1.42e-05	71	61
ENOSF1	0.782627	0.253939	3.08195	1.22e-13	98	100
ENPP4	0.813578	0.307554	2.64532	2.81e-10	99	123
ENPP5	0.0537521	0.0092209	5.82938	2.98e-07	43	15
ENSA	8.31894	1.72628	4.81901	5.71e-08	98	114
ENTPD5	1.71977	0.492752	3.49012	1.46e-13	96	96
EPB41L1	1.00398	0.413549	2.42772	9.51e-09	99	123
EPB41L3	1.31225	0.53202	2.46654	1.38e-08	99	131
EPB41L4A	0.0120913	0.00472654	2.55817	2.33e-07	55	30
EPB41L5	0.084683	0.022285	3.80001	1.06e-10	77	53
EPHX2	4.91862	1.40265	3.50667	1.5e-13	99	125
EPM2AIP1	0.447861	0.136355	3.28452	4.87e-10	94	99
EPS8	1.47951	0.645941	2.29046	1.69e-07	98	128
ERBB2	0.117323	0.0317235	3.69829	2.62e-11	83	60
ERBB3	0.0106873	0.00246692	4.33224	2e-05	45	23
ERCC1	0.0836788	0.0349057	2.39728	8.59e-07	59	37
ERCC4	0.00891384	0.0032806	2.71714	0.00205167	42	31
ERO1LB	0.0719109	0.033777	2.12899	2.04e-08	91	89
ETFA	27.0496	7.73878	3.49534	3.61e-18	99	133
ETFB	19.7125	6.05224	3.25705	9.37e-12	99	132
ETFDH	2.16864	0.717873	3.02093	1.9e-11	99	126
EXD2	0.0817271	0.0264083	3.09474	6.09e-08	91	92
EXOC3L2	0.841563	0.401996	2.09346	5.09e-08	95	104
EXOC3L4	0.137727	0.0457594	3.00981	1.23e-06	63	43
EXOC6	0.0524808	0.0213469	2.45847	3.83e-06	79	69
EXOC6B	0.346241	0.159416	2.17194	1.53e-09	99	116
EXOG	0.103797	0.0208338	4.98213	8.42e-06	59	43
EXOSC3	0.78747	0.248522	3.16861	3.17e-05	94	105
EXOSC8	0.322102	0.120399	2.67527	1.24e-06	94	100
FAAH	0.633237	0.239705	2.64174	1.43e-13	96	92
FABP1	13.6879	2.11511	6.47147	0.000253122	56	46
FABP3	22.59	5.89398	3.83272	4.04e-09	99	129
FABP4	0.939011	0.446717	2.10203	0.0158419	53	52
FABP5	16.1664	6.05484	2.67	0.00291984	98	128
FADD	1.14387	0.490515	2.33198	7.27e-08	97	115
FAH	4.94169	2.33376	2.11748	5.54e-11	99	131
FAHD1	18.1752	5.14634	3.53168	5.5e-14	99	131
FAHD2A	1.17773	0.462323	2.54741	1.82e-08	99	125
FAIM	0.0639166	0.0269106	2.37514	1.7e-05	65	52
FAM103A1	0.198151	0.0746768	2.65345	0.000134991	61	51
FAM120C	0.109996	0.0495678	2.2191	0.00131327	70	71
FAM136A	0.387423	0.157892	2.45373	1.31e-06	82	75
FAM151A	0.137468	0.0240317	5.72028	9.18e-05	47	32
FAM160A2	0.0740687	0.0190236	3.89351	1.41e-10	89	79
FAM175B	1.04177	0.51635	2.01757	1.12e-10	97	97
FAM185A	0.0670314	0.0134658	4.9779	5.82e-11	68	38
FAM208A	0.0864212	0.0356419	2.42471	1.38e-05	79	76
FAM20B	0.0422812	0.0162058	2.60902	0.00111144	55	46
FAM210A	0.119887	0.0311653	3.84681	3.94e-14	87	64
FAM213A	3.37193	1.50371	2.24242	1.16e-09	99	131
FAM213B	0.105241	0.0463659	2.26978	2.45e-05	68	57
FAM63B	0.0906188	0.0201668	4.49345	8.36e-06	53	34
FAM83H	0.0654041	0.0152962	4.27583	2.29e-06	68	53
FAM84B	0.407828	0.14765	2.76214	7.45e-17	99	93
FAM91A1	0.306455	0.131938	2.32271	2.17e-10	99	121
FAM98C	0.138492	0.0613617	2.25698	1.82e-13	97	93
FARP1	1.28581	0.557433	2.30667	1.09e-10	99	130
FASN	1.69305	0.678942	2.49366	0.0387049	99	133
FASTKD5	0.133197	0.0231137	5.7627	1.83e-06	56	31
FBP1	23.6341	3.49248	6.76714	1.48e-12	99	130
FBP2	0.370658	0.10952	3.38438	1.04e-13	79	48
FBXL18	0.158872	0.0699587	2.27093	0.0029538	50	42
FBXL20	0.146121	0.0661796	2.20795	0.000232835	81	84
FBXO2	0.186712	0.0234414	7.96505	0.00227767	49	42
FBXO21	0.257628	0.0762041	3.38076	2.37e-10	84	68
FBXO38	0.0163144	0.00708654	2.30217	9.83e-10	76	52
FCHO2	0.630256	0.292544	2.15439	1.63e-08	99	125
FDX1L	0.0592498	0.0100315	5.90637	1.68e-06	46	24
FDXR	2.02914	0.835197	2.42953	4.23e-07	98	128
FECH	1.90484	0.384229	4.95756	1.01e-12	99	122
FERMT2	2.70914	1.28364	2.11052	3.26e-07	99	132
FGD4	0.26389	0.113046	2.33437	1.21e-05	95	106
FGGY	1.01171	0.492046	2.05614	1.53e-10	98	114
FH	9.64197	2.63456	3.65981	3.56e-14	99	133
FHIT	1.57554	0.464203	3.39408	1.43e-10	99	113
FIG4	0.0155997	0.00670391	2.32696	7.14e-08	72	51
FIS1	9.61121	4.15272	2.31444	5.74e-09	99	129
FLCN	0.0202395	0.00554331	3.65116	5.37e-06	48	27
FLRT3	0.159607	0.0361561	4.41438	1.02e-13	73	37
FLYWCH2	0.0569122	0.0178864	3.18187	1.44e-07	58	34
FMO1	4.08497	0.857128	4.76589	3.44e-13	97	107
FMO4	0.124999	0.0239354	5.22234	9.22e-06	51	32
FN3K	3.1799	0.987964	3.21864	3.92e-09	98	128
FNBP1L	0.632024	0.187662	3.36788	1.96e-12	98	106
FNBP4	0.0119028	0.00443406	2.68441	0.000893106	51	40
FNTA	1.68597	0.811116	2.07859	1.86e-11	99	132
FOCAD	0.169218	0.0307151	5.50928	1.24e-05	89	92
FOXRED1	0.114274	0.0351778	3.24847	3.1e-07	77	68
FRAS1	0.0700132	0.00343308	20.3937	5.77e-05	38	23
FTCD	4.74034	1.08691	4.36128	6.44e-09	84	74
FUNDC2	0.364265	0.155031	2.34963	1.03e-07	69	46
FUOM	0.217612	0.057024	3.81614	1.75e-06	54	34
FXN	0.785229	0.138038	5.68849	2.97e-09	71	46
FXYD2	1.24446	0.200377	6.21058	4.39e-09	53	23
FYCO1	0.120107	0.0571758	2.10066	1.28e-07	98	115
FZD6	0.0274889	0.012846	2.13988	0.00130286	49	41
GAB1	0.0497602	0.0237408	2.09598	5.4e-06	53	31
GALK2	0.897772	0.359885	2.49461	5.59e-10	99	119
GALM	7.70773	3.02476	2.54821	7.65e-11	99	131
GALNS	0.115366	0.0550829	2.0944	9.32e-07	80	70
GALNT11	0.373965	0.0725335	5.15576	1.15e-09	86	78
GALT	0.514579	0.1845	2.78905	1.33e-09	98	118
GAMT	5.8238	1.98622	2.9321	6.42e-13	99	117
GAS2L1	0.0488636	0.0145401	3.3606	0.000127489	59	49
GATC	0.236006	0.0838216	2.81558	4.65e-09	76	56
GATM	86.1559	11.517	7.48078	2.54e-12	99	132
GBA2	0.121385	0.0395626	3.06819	4.99e-15	74	31
GBA3	0.405704	0.112522	3.60556	1.14e-07	71	55
GBAS	4.54944	1.53832	2.95742	4.14e-07	99	130
GBP3	0.432609	0.146983	2.94326	0.00213225	38	27
GCDH	2.28951	0.557394	4.10751	1.64e-10	99	129
GCFC2	0.0313543	0.0109438	2.86502	0.0011736	51	40
GCHFR	3.0353	1.02721	2.9549	1.02e-06	94	112
GCSH	2.88437	0.519058	5.55693	6.61e-08	87	86
GDA	6.78971	2.65093	2.56126	7.64e-08	96	114
GDAP1	0.173315	0.0539928	3.20996	1.5e-08	82	69
GDPD1	0.0789459	0.00606143	13.0243	2.57e-06	55	36
GDPGP1	0.151237	0.0487911	3.09969	1.64e-06	60	42
GEMIN4	0.0800906	0.0383657	2.08756	9.85e-10	82	59
GET4	0.872802	0.36529	2.38934	4.92e-08	98	119
GFM1	1.10998	0.479948	2.3127	5.62e-08	99	128
GFM2	0.248372	0.0469266	5.29277	1.24e-15	96	89
GFOD2	0.0556607	0.0148717	3.74274	7.39e-09	58	30
GGA1	0.0550275	0.0229486	2.39785	7.64e-07	77	66
GGA3	0.0566011	0.025261	2.24065	3.46e-05	78	72
GGACT	1.84247	0.618042	2.98114	5.15e-06	82	80
GGH	2.71277	1.34744	2.01328	0.001309	98	132
GGT1	5.04892	2.01023	2.51162	8.06e-10	98	111
GHITM	0.930975	0.373579	2.49204	0.000163222	76	76
GIGYF1	0.0462274	0.0172221	2.68419	0.00471206	38	29
GIPC2	1.58784	0.688602	2.30589	7.45e-13	96	94
GK	1.43671	0.362412	3.9643	6.7e-11	98	118
GLB1	1.66958	0.713699	2.33934	0.000232374	99	132
GLB1L	0.0456974	0.010218	4.47226	8.82e-07	55	34
GLB1L2	0.0263543	0.00445496	5.91573	1.38e-08	51	22
GLCE	0.0987668	0.00921436	10.7188	7.04e-08	58	32
GLDC	0.402982	0.102342	3.93759	1.32e-06	73	60
GLMN	0.0420899	0.0204867	2.0545	7.96e-06	79	70
GLO1	25.8944	11.4715	2.25729	8.29e-21	99	133
GLOD4	5.76284	2.70414	2.13112	2.13e-17	99	133
GLRX5	2.77734	1.1551	2.40442	1.61e-09	99	118
GLS	14.6435	3.39345	4.31523	5.56e-09	99	132
GLUD1	38.8596	16.641	2.33517	2.61e-09	99	132
GLUD2	12.9352	5.48165	2.35972	3.9e-07	79	68
GLYAT	6.53412	0.862271	7.5778	2.02e-14	97	103
GLYATL1	2.51242	0.332826	7.54875	4.48e-12	96	107
GMPR	0.259299	0.0907272	2.85801	0.00731599	54	51
GMPR2	8.76378	2.33677	3.75038	9.47e-15	99	126
GNL1	5.4049	1.9531	2.76735	4.73e-07	98	130
GNPDA1	11.8024	4.99248	2.36403	1.09e-16	99	133
GNPDA2	4.88968	2.33271	2.09614	1.21e-07	99	125
GNPNAT1	0.267354	0.12798	2.08903	0.000183251	85	88
GOLGA1	0.566551	0.281709	2.01112	7.85e-06	75	66
GOSR2	1.40612	0.681532	2.06318	4.93e-09	99	122
GOT1	11.0101	3.40607	3.23249	7.89e-18	99	132
GOT2	17.6615	4.46022	3.95979	1.05e-09	99	132
GPCPD1	0.0572572	0.0144318	3.96743	0.0393537	33	30
GPD1	10.3721	3.95657	2.62149	6e-10	98	119
GPD1L	0.420225	0.11745	3.57792	9.73e-07	97	113
GPHN	1.33707	0.428944	3.11713	2.97e-11	99	105
GPI	129.347	52.5155	2.46302	1.84e-19	99	133
GPR108	0.0455095	0.0194583	2.33882	7.95e-08	85	77
GPR180	0.0166334	0.00820692	2.02676	1.21e-05	58	41
GPR56	0.0827565	0.0239912	3.44945	6.65e-11	80	60
GPR98	0.00248535	0.000916241	2.71256	1.07e-07	44	17
GPT	1.95379	0.446667	4.37414	3.86e-15	91	76
GPX4	6.03234	2.78196	2.16838	8.05e-16	99	133
GRAMD3	0.0556382	0.0255441	2.17812	0.0062472	51	46
GRB10	0.164147	0.0531407	3.08891	7.39e-06	84	82
GRB7	0.0257861	0.00783496	3.29115	6.65e-09	57	28
GRHPR	14.1525	3.62298	3.90632	4.44e-26	99	133
GRIPAP1	0.632899	0.310969	2.03525	2.17e-06	99	125
GRPEL1	2.85974	1.2533	2.28176	2.02e-10	99	128
GSPT2	0.244791	0.0909962	2.69012	1.34e-09	82	64
GSR	9.80719	4.15552	2.36004	1.13e-16	99	133
GSS	4.61107	2.02688	2.27496	1.21e-14	99	133
GSTA1	93.8421	22.2084	4.22552	5.9e-20	88	51
GSTA3	73.2139	21.4176	3.41839	8.3e-14	80	49
GSTK1	35.449	12.8021	2.769	6.26e-14	99	133
GSTM4	0.982773	0.452662	2.1711	9.22e-09	89	80
GSTP1	272.173	118.996	2.28725	6.55e-10	99	133
GSTZ1	1.34022	0.305319	4.38956	3.55e-09	96	108
GTF2A2	0.0582061	0.0264175	2.20331	3.27e-05	49	30
GTF2F1	0.0923657	0.0432747	2.1344	5.41e-10	89	79
GTF3C3	0.149199	0.0625878	2.38384	7.17e-06	95	105
GTF3C4	0.914035	0.18394	4.96921	1.62e-11	99	106
GTPBP10	0.0636361	0.0145732	4.36666	1.07e-07	62	40
GTPBP3	0.0188094	0.00774451	2.42874	0.0110667	46	41
GTPBP6	0.07635	0.0172895	4.41596	1.22e-05	64	52
GUF1	0.0654056	0.00878474	7.44536	5.25e-10	64	36
H2AFY2	3.69868	1.41515	2.61364	3.77e-10	99	117
HABP4	0.130315	0.0625388	2.08375	1.51e-10	60	27
HADH	13.0304	2.72995	4.77311	1.07e-12	99	132
HADHA	68.6067	25.7618	2.66312	1.01e-12	99	132
HADHB	33.2749	10.2938	3.2325	1.09e-14	99	132
HAO2	0.985546	0.149574	6.58902	1.99e-09	66	40
HAUS4	0.00551515	0.00252489	2.18432	4.41e-05	49	32
HDAC5	0.00632454	0.00119323	5.30034	0.000775585	36	23
HDAC6	0.556802	0.244388	2.27835	2.55e-09	99	126
HDDC2	0.817029	0.27138	3.01065	2.5e-14	99	111
HDHD1	1.19175	0.578407	2.06041	8.12e-10	99	112
HDHD2	2.64594	0.852992	3.10195	3.7e-12	99	126
HDHD3	1.64388	0.558932	2.94111	1.79e-12	99	114
HEATR5B	0.110084	0.0391524	2.81167	4.01e-15	99	106
HERC2	0.00751182	0.00153135	4.90535	0.0259629	32	26
HGD	6.53509	2.80343	2.33111	2.92e-10	99	125
HGS	1.51344	0.564202	2.68245	1.57e-05	98	128
HHAT	0.0461864	0.0148314	3.11409	0.0120197	34	25
HIBADH	16.5297	4.33621	3.81202	4.12e-12	99	132
HIBCH	5.89585	1.37776	4.27931	3.52e-13	99	131
HIGD2A	0.394988	0.153968	2.56538	1.05e-07	59	35
HINT1	57.7339	24.7174	2.33576	2.4e-15	99	133
HINT2	5.93261	1.1916	4.97869	2.32e-12	99	125
HIP1R	0.527957	0.184477	2.86191	8.79e-12	99	120
HLCS	0.0399421	0.0192336	2.07668	3.03e-05	62	46
HLTF	0.113204	0.038601	2.93267	5.61e-05	61	50
HMBS	0.200943	0.0462154	4.34797	8.93e-08	83	78
HMGCL	7.2927	2.03585	3.58213	8.93e-16	99	132
HMGCS1	0.0877361	0.0231534	3.78934	5.78e-08	72	53
HMGCS2	0.994223	0.156364	6.3584	0.000186384	54	45
HMGN1	0.344603	0.137343	2.50906	7.76e-05	54	40
HMGN5	0.0592331	0.0156626	3.78183	0.0014271	41	31
HNF1A	0.197798	0.0799365	2.47444	2.3e-09	88	77
HNF1B	0.103949	0.0396312	2.6229	1.09e-09	88	78
HNF4A	0.198	0.0864825	2.28949	4e-12	85	66
HNMT	3.28622	1.42106	2.31251	1.13e-09	99	127
HOGA1	0.621966	0.112618	5.52278	1.31e-06	63	48
HOMER3	0.0702022	0.0263397	2.66526	0.00599419	57	55
HOOK1	2.11218	0.65196	3.23974	1.39e-11	99	107
HPN	3.03707	0.70178	4.32767	9.68e-09	75	53
HPS3	0.0477335	0.0234732	2.03353	0.00133355	77	79
HPS5	0.0469762	0.0183332	2.56236	0.00108207	65	62
HRAS	0.493338	0.211829	2.32894	1.94e-06	62	43
HRSP12	8.90028	1.87629	4.74354	1.64e-13	98	110
HS1BP3	2.72741	1.08985	2.50255	2.23e-11	99	128
HSD11B2	1.66982	0.197941	8.43594	4.54e-06	86	93
HSD17B10	19.8508	8.65462	2.29367	3.95e-09	99	132
HSD17B14	0.225199	0.0449609	5.00877	4.13e-08	59	33
HSD17B8	1.07824	0.379948	2.83786	1.67e-09	99	118
HSDL2	5.54779	1.25431	4.42299	4.61e-17	99	130
HSPA4L	1.76355	0.773166	2.28094	2.33e-07	98	129
HSPA9	64.0048	23.4887	2.72492	3.08e-15	99	133
HSPB2	0.155602	0.0479379	3.24591	3.24e-05	39	19
HSPD1	169.163	58.4534	2.89397	5.53e-10	99	132
HSPE1	143.365	50.3249	2.8488	3.78e-12	99	132
IARS2	5.16003	2.2365	2.30719	9.18e-10	99	132
IBA57	2.26874	0.800375	2.8346	1.23e-10	99	123
ICT1	0.726054	0.228497	3.17752	0.0346007	66	77
IDH2	72.0614	18.192	3.96116	9.15e-15	99	133
IDH3A	1.88603	0.902818	2.08905	0.000432255	99	129
IDH3B	1.75591	0.440087	3.98991	6.82e-11	99	127
IDH3G	1.70018	0.573232	2.96596	1.81e-10	99	129
IDNK	0.367073	0.0889729	4.12567	2.22e-13	89	73
IDS	0.0306731	0.011601	2.64401	0.0188841	35	30
IFI30	0.361703	0.0939077	3.85168	0.000131669	72	70
IFIH1	0.0642426	0.0209677	3.06388	8.22e-09	77	62
IFIT2	0.336569	0.141748	2.37442	0.0207799	88	107
IFT122	0.0321198	0.0130039	2.47001	4.56e-11	83	61
IFT140	0.0211635	0.00965466	2.19205	4.37e-14	90	66
IGF1R	0.202678	0.0722874	2.80379	8e-13	92	81
IGSF3	0.0202222	0.00566662	3.56866	4.21e-07	59	37
IKBKAP	0.147626	0.0605625	2.43759	2.59e-10	99	122
ILVBL	1.39388	0.649184	2.14713	1.2e-09	99	129
IMMT	8.59385	3.62599	2.37007	1.74e-10	99	132
IMP4	0.0705048	0.0309381	2.2789	0.00933462	51	46
IMPA1	2.21529	1.09964	2.01456	2.62e-07	98	127
IMPA2	3.53466	1.22269	2.89088	1.01e-12	99	120
INADL	0.0383746	0.0169352	2.26597	1.07e-17	90	55
INPP5A	0.0536368	0.0252884	2.121	0.00126323	75	77
INPP5F	0.00716121	0.00115338	6.20887	1.45e-05	43	23
INTS6	0.204484	0.0861477	2.37365	1.1e-07	84	79
IPO13	0.0194615	0.00916774	2.12282	0.00132482	60	52
IQSEC1	0.0916062	0.0414016	2.21262	9.53e-05	78	72
IREB2	0.0260267	0.00553421	4.70287	0.0351141	35	28
IRF2BP1	0.227038	0.0864593	2.62595	3.14e-08	90	84
IRF6	0.0601654	0.0113868	5.28376	6.59e-07	52	28
ISCA1	0.122371	0.0418472	2.92423	3.29e-08	67	45
ISCU	0.560813	0.210946	2.65857	4.25e-09	97	107
ISOC1	3.40914	1.67059	2.04068	2.85e-12	99	132
ISOC2	15.3804	5.02325	3.06185	1.05e-11	99	130
ISPD	0.0230062	0.01071	2.1481	4e-05	48	30
ITGA2	1.29965	0.63726	2.03943	0.000120648	99	129
ITGA6	1.54886	0.755669	2.04965	1.28e-10	99	130
ITPKC	0.0223073	0.0108233	2.06104	3.9e-07	57	33
ITSN1	0.251325	0.105884	2.37359	2.83e-07	99	117
IVD	2.46923	0.603575	4.09101	1.9e-13	99	128
IVNS1ABP	0.239806	0.107289	2.23514	2.16e-09	99	117
KANK1	0.190001	0.0676328	2.8093	3.85e-14	98	97
KANK3	0.0930082	0.0391182	2.37762	0.00014896	78	81
KATNAL1	0.0296492	0.0131415	2.25615	4.62e-07	62	41
KCNJ15	0.0440468	0.00969767	4.542	2.4e-09	46	14
KCP	0.0637397	0.00292353	21.8023	4.39e-08	46	20
KDR	0.0904336	0.0160844	5.62243	0.015304	46	40
KDSR	2.04977	0.739167	2.77308	6.39e-08	99	126
KHK	19.1484	6.1711	3.10292	7.59e-09	97	126
KIAA0020	0.208159	0.0858479	2.42474	1.34e-08	97	116
KIAA0100	0.00684596	0.00290895	2.35341	0.0014086	44	34
KIAA0195	0.185813	0.0726187	2.55875	8.98e-09	90	84
KIAA0319L	0.0635201	0.0314291	2.02106	6.59e-07	90	86
KIAA0391	0.0679015	0.0111105	6.1115	2.41e-05	64	54
KIAA1217	0.546198	0.246722	2.21382	2.25e-07	99	124
KIAA1456	0.0368917	0.0133577	2.76184	7.31e-06	61	46
KIAA1468	0.138119	0.0628817	2.1965	1.36e-10	98	117
KIAA1598	2.01314	0.728706	2.76262	1.76e-09	99	127
KIAA1671	0.0253271	0.0104845	2.41567	5.99e-05	61	49
KIAA1704	0.0600678	0.0219623	2.73504	4.08e-08	78	64
KIDINS220	0.0511926	0.0238671	2.1449	1.3e-06	92	100
KIF12	0.0318743	0.00639955	4.98072	4.08e-07	53	29
KIF13A	0.0301552	0.0131448	2.29407	0.0012436	53	47
KIF13B	0.315842	0.143713	2.19773	2.75e-11	99	128
KIF1B	0.0824837	0.0333808	2.47099	1.15e-08	90	88
KIF3B	0.103847	0.0311261	3.33633	6.19e-09	75	56
KLHDC4	0.111388	0.0272894	4.08175	1.21e-08	63	34
KLHDC7A	0.114949	0.0266092	4.31987	6.8e-13	68	30
KLHL22	0.0495788	0.00709857	6.98433	2.49e-09	79	62
KRT78	0.246046	0.0936505	2.62728	0.000495515	44	32
KXD1	0.17438	0.0639476	2.72692	9.37e-11	86	70
L2HGDH	0.877591	0.200431	4.37853	1.25e-14	99	107
LACE1	0.131199	0.00729338	17.9887	1.12e-13	61	21
LACTB2	3.75574	1.34188	2.79886	2.21e-11	99	127
LAGE3	0.228016	0.107666	2.11781	1.49e-06	78	67
LAMA1	0.529815	0.122136	4.3379	1.61e-06	88	91
LAMB4	0.00538182	0.00139714	3.85202	4.91e-08	49	21
LAMP2	5.88968	2.86783	2.05371	4.98e-07	99	132
LAMTOR4	2.55079	1.22215	2.08713	1.13e-06	98	119
LAMTOR5	2.04248	0.943975	2.1637	6.57e-10	99	130
LARS2	0.190103	0.0455285	4.17548	1.85e-09	88	74
LDHB	191.672	70.2851	2.72706	2.49e-15	99	133
LDHD	1.06443	0.200699	5.3036	5.77e-12	83	60
LDLRAP1	0.0242717	0.00466413	5.2039	2.09e-05	39	20
LEO1	0.0328539	0.0151869	2.16331	9.71e-06	75	67
LETMD1	0.242698	0.105998	2.28964	0.000199973	81	84
LGALS2	2.49286	0.868539	2.87018	3.27e-08	91	98
LGALSL	0.556839	0.19073	2.91952	2.02e-09	96	107
LGMN	0.418097	0.194923	2.14493	0.000669007	95	112
LHPP	0.797222	0.322045	2.4755	3.23e-10	99	114
LIG4	0.0212816	0.00691925	3.07571	2.48e-07	81	67
LIMD1	0.0665735	0.0279336	2.38328	1.18e-07	91	96
LIN7A	0.418141	0.0878817	4.758	1.52e-13	82	56
LIN7C	0.669529	0.312195	2.14459	0.00272651	88	105
LLGL2	0.251085	0.0426022	5.89372	2.1e-22	94	64
LMF2	0.831974	0.255835	3.252	4.83e-08	99	121
LOC650157	2.33177	1.06304	2.19349	0.000210982	94	116
LOH12CR1	0.295077	0.117123	2.51938	3.7e-10	92	88
LONP1	6.81792	2.87544	2.37109	3.96e-09	99	132
LONP2	0.0471908	0.00486932	9.69145	1.94e-17	80	41
LPHN2	0.0643407	0.0281671	2.28425	0.000105938	76	70
LPIN2	0.0442584	0.0117286	3.77355	1.27e-07	81	73
LPIN3	0.0182084	0.00646376	2.817	1.45e-06	56	35
LRBA	0.447377	0.206351	2.16804	3.23e-10	99	128
LRCH1	0.378157	0.167384	2.25921	1.16e-07	98	113
LRCH3	0.107174	0.0257651	4.15966	6.33e-06	86	87
LRP2	3.97255	1.09297	3.63465	5.03e-13	98	118
LRPAP1	2.25954	0.937484	2.41022	3.76e-09	99	122
LRPPRC	4.46389	1.6366	2.72754	6.4e-12	99	132
LRRC1	0.193018	0.0562985	3.42848	3.85e-17	98	83
LRRC16A	0.351962	0.130863	2.68954	2.93e-11	99	114
LRRC19	0.0466028	0.0084794	5.49601	2.32e-10	51	17
LRRC41	0.0460753	0.0142672	3.22945	3.21e-07	74	59
LRRC57	0.809645	0.341545	2.37054	2.19e-10	99	116
LRRC8A	0.15408	0.0679741	2.26674	1.36e-13	99	97
LRSAM1	0.584878	0.230516	2.53726	1.11e-07	97	104
LRWD1	0.0787462	0.0266044	2.95989	1.19e-09	82	64
LSM6	0.306317	0.0942329	3.25064	1.53e-10	60	25
LSR	0.0718837	0.0213139	3.37262	5.62e-05	60	48
LSS	0.454797	0.212739	2.13782	2.38e-07	98	122
LYPLA2	1.76083	0.80117	2.19783	3.36e-11	99	130
LYPLAL1	2.79567	1.04151	2.68424	8.82e-10	99	126
LYRM4	0.467242	0.159612	2.92735	1.19e-06	78	69
LYRM5	0.463469	0.0432486	10.7164	2.83e-09	47	16
LYRM7	1.53428	0.53723	2.85591	8.23e-08	93	99
LYRM9	0.233707	0.0740517	3.156	0.00136207	38	26
LZTFL1	2.29118	0.939542	2.43862	1.29e-09	99	119
MACC1	0.0977235	0.0318171	3.07142	0.000134478	66	56
MACROD1	2.54898	0.706882	3.60594	1.03e-08	97	123
MAD2L1BP	0.0114542	0.00422594	2.71046	0.000440404	42	28
MADD	0.00701111	0.00262624	2.66964	0.000128072	69	64
MAK16	0.195761	0.0889318	2.20125	0.000246903	81	80
MALSU1	0.0491319	0.0217031	2.26382	1.24e-05	53	32
MAN2B2	0.181464	0.0906705	2.00135	1.02e-06	90	95
MAN2C1	0.50531	0.203379	2.48457	7.14e-12	99	128
MAOA	17.7844	5.73943	3.09863	4.2e-08	99	128
MAOB	40.0762	10.9244	3.66848	2.7e-17	99	132
MAP2K4	0.688289	0.307297	2.23982	6.01e-10	99	116
MAP2K6	0.206902	0.102548	2.01762	2.05e-07	89	90
MAP3K4	0.0158412	0.00709323	2.23329	0.0105532	41	33
MAP4K5	0.0136155	0.00517985	2.62854	0.000164241	46	31
MAPK8	0.0221282	0.00590947	3.74453	6.83e-07	50	27
MAPKAP1	0.0350786	0.0135892	2.58136	1.37e-08	71	47
MAPKAPK3	0.0445516	0.0216029	2.0623	0.00265149	38	25
MAPT	1.05985	0.370098	2.86371	3.4e-16	97	85
MARCH1	0.160593	0.0378872	4.23871	2.49e-07	48	23
MARCH2	3.93308	1.0664	3.68817	1.11e-10	99	125
MARCKSL1	1.40635	0.183364	7.66972	2.13e-05	45	27
MARK2	0.198765	0.0522865	3.80145	4.02e-06	80	73
MARS2	0.1974	0.0294547	6.70182	1.12e-08	80	66
MAT2A	10.5529	4.25179	2.48199	6.79e-21	99	133
MAT2B	3.67494	1.58301	2.32149	1.16e-14	99	132
MAU2	0.0602056	0.0110119	5.46733	0.00559195	64	65
MAZ	0.0169923	0.00782782	2.17076	0.0017926	35	23
MB21D2	0.0336004	0.0122728	2.7378	1.39e-08	55	25
MBLAC2	0.232293	0.111116	2.09054	2.8e-12	98	94
MCAT	0.499263	0.154657	3.22819	2.77e-11	97	104
MCC	0.0633071	0.0194217	3.2596	0.00246402	49	44
MCCC1	2.69547	0.939517	2.869	1.22e-08	99	127
MCCC2	7.19083	1.38549	5.19011	1.86e-12	99	128
MCEE	1.24892	0.377787	3.30589	1.05e-10	97	111
MCRS1	0.0193873	0.0091706	2.11407	0.00127168	45	34
MCUR1	0.115995	0.0195208	5.94215	8.41e-10	76	57
MDH1	75.6057	24.6811	3.06331	1.27e-22	99	133
MDH2	177.294	76.3381	2.32249	8.64e-12	99	133
ME3	0.369774	0.0549633	6.72766	3.3e-11	93	91
MED10	0.120608	0.057695	2.09044	0.0486867	41	39
MED20	0.0887958	0.0307167	2.8908	2.38e-08	71	51
MED23	0.0590056	0.0275742	2.13988	6.4e-05	84	86
MED25	0.00864758	0.00425639	2.03167	0.000136888	48	33
MERTK	0.0170319	0.00758083	2.24671	0.000124745	43	28
METAP1D	0.0458035	0.00331173	13.8307	8.55e-12	54	17
METTL1	0.0676374	0.0241537	2.80029	0.00196513	49	39
METTL14	0.452212	0.189846	2.38199	3.31e-05	91	100
METTL9	0.30026	0.138915	2.16147	1.59e-10	93	89
MFF	0.613666	0.22424	2.73664	3.19e-05	93	105
MFN1	0.113401	0.0501003	2.26347	2.83e-06	92	99
MFN2	0.526265	0.256528	2.05149	3.76e-07	99	125
MGME1	0.0958998	0.0273577	3.50541	0.000284797	41	26
MGST3	15.2986	7.29773	2.09636	2.84e-08	99	131
MIA2	0.10954	0.00971571	11.2745	2.63e-12	75	44
MIA3	0.365763	0.157428	2.32337	1.19e-08	99	127
MID1	0.513898	0.200145	2.56763	1.31e-05	85	88
MINOS1	0.330753	0.100112	3.30384	0.000111962	51	37
MIOS	0.265495	0.117246	2.26442	2.3e-09	99	120
MIOX	0.300553	0.0584841	5.13905	6.97e-11	57	24
MIPEP	0.391492	0.102769	3.80943	2.93e-16	99	102
MLH1	0.0278606	0.0105778	2.63387	1.44e-06	59	38
MLLT4	0.430069	0.206821	2.07943	3.82e-10	99	126
MLST8	0.179727	0.0857768	2.09529	6.58e-06	79	72
MMAA	0.813852	0.345858	2.35314	5.25e-11	99	117
MME	5.34819	1.41133	3.78947	5.58e-08	98	119
MNF1	0.528735	0.254605	2.07669	8.03e-06	91	99
MOCS3	0.222847	0.0965955	2.30702	9.26e-13	99	103
MON2	0.229125	0.106281	2.15585	2.3e-07	98	119
MORC2	0.0216131	0.00826812	2.61403	1.59e-06	59	37
MPC1	0.49834	0.0607648	8.20112	3.21e-12	77	51
MPC2	7.42937	2.07835	3.57465	4.3e-10	99	127
MPDZ	0.0279769	0.00275451	10.1567	0.000388023	48	38
MPHOSPH6	0.106736	0.0335467	3.1817	5.1e-05	57	42
MPI	4.2059	2.08425	2.01794	7.41e-10	99	131
MPP5	0.162812	0.0593446	2.7435	9.03e-10	89	80
MPP7	0.162856	0.0106486	15.2937	2.37e-07	41	17
MPST	4.49781	1.70273	2.64152	2.4e-13	99	132
MPV17	0.999383	0.217947	4.58545	1.12e-14	87	61
MRI1	0.509667	0.221781	2.29806	2.24e-11	99	117
MROH1	0.0781338	0.0240032	3.25514	1.39e-05	74	70
MRPL1	0.438967	0.201975	2.17338	7.94e-06	82	79
MRPL10	0.794683	0.165297	4.8076	3.87e-06	87	91
MRPL11	0.576647	0.269159	2.1424	3.04e-07	97	112
MRPL12	2.41617	0.946182	2.5536	3.26e-09	98	109
MRPL14	0.163779	0.056544	2.89649	3.36e-05	67	58
MRPL15	0.572784	0.22958	2.49492	1.08e-08	95	103
MRPL16	0.253429	0.107116	2.36593	2.77e-11	90	76
MRPL18	0.367616	0.102217	3.59644	6.12e-07	81	73
MRPL2	0.125314	0.0195386	6.41367	6.19e-07	60	40
MRPL20	0.285371	0.0868205	3.28691	1.36e-13	87	61
MRPL22	0.816929	0.398355	2.05076	2.03e-09	97	113
MRPL23	0.119503	0.0244744	4.88276	0.000668692	51	43
MRPL24	0.554894	0.236167	2.34958	1.46e-06	98	117
MRPL27	0.137836	0.0288272	4.78147	0.000132833	38	21
MRPL28	0.522044	0.212292	2.45908	4.35e-05	84	86
MRPL3	0.16487	0.0506074	3.25782	4.22e-09	85	74
MRPL33	0.166469	0.0477971	3.48283	0.00326741	41	31
MRPL38	0.437093	0.210472	2.07673	2.04e-06	97	110
MRPL39	1.12311	0.515925	2.17688	4.41e-06	98	120
MRPL4	0.286721	0.111194	2.57855	1.01e-09	85	68
MRPL40	0.288759	0.0947135	3.04876	1.77e-07	87	83
MRPL41	0.261546	0.105001	2.4909	0.000306505	62	53
MRPL42	0.477888	0.0966427	4.9449	0.00110844	37	25
MRPL44	0.659038	0.213019	3.0938	3.55e-10	99	118
MRPL45	0.754055	0.218342	3.45355	1.87e-09	98	116
MRPL50	0.550718	0.236141	2.33215	1.38e-05	84	86
MRPL52	0.364739	0.135534	2.69112	2.4e-07	60	36
MRPL55	0.371654	0.116253	3.19693	0.00732354	56	54
MRPL9	0.164251	0.0578068	2.84138	1.51e-10	82	62
MRPS11	1.0006	0.310475	3.2228	4.99e-06	87	89
MRPS15	0.200634	0.0283541	7.07601	3.01e-08	65	44
MRPS16	0.0956336	0.018646	5.1289	1.18e-07	56	31
MRPS17	0.411101	0.134575	3.05481	1.81e-09	83	67
MRPS18B	0.30518	0.0628137	4.85849	4.35e-07	68	51
MRPS2	0.371602	0.180924	2.05391	1.44e-05	70	59
MRPS21	0.567535	0.175352	3.23654	4.26e-17	93	70
MRPS22	1.14519	0.505453	2.26568	1.04e-08	99	122
MRPS23	2.04515	0.696507	2.93629	8.05e-10	98	120
MRPS24	0.333532	0.122832	2.71534	0.000171143	74	72
MRPS25	0.34905	0.100244	3.482	9.29e-09	80	64
MRPS26	0.488089	0.188379	2.59099	1.97e-06	79	70
MRPS28	2.07236	0.538081	3.85138	2.17e-13	99	111
MRPS31	0.43586	0.182125	2.39319	7.09e-13	99	108
MRPS33	0.555023	0.0733143	7.57046	1.38e-10	56	23
MRPS34	0.102785	0.0403805	2.5454	0.000369833	61	52
MRPS35	0.270711	0.0865914	3.12631	2.68e-13	96	87
MRPS36	6.44092	1.52292	4.22931	1.67e-09	98	123
MRPS5	0.156776	0.0639904	2.45	1.27e-06	83	81
MRPS6	0.557889	0.25829	2.15993	1.15e-07	81	70
MRPS7	1.27459	0.421154	3.02642	2.47e-10	95	99
MRPS9	0.337045	0.0846235	3.98287	3.26e-11	97	101
MRRF	0.102399	0.0336627	3.04191	7.26e-06	49	29
MSI2	1.24078	0.521732	2.3782	1.58e-10	99	122
MSRA	3.99474	0.770222	5.18647	3.88e-16	99	126
MSRB2	0.707896	0.179622	3.94104	1.03e-09	93	94
MTCH1	0.660159	0.245282	2.69143	3.85e-10	99	114
MTCH2	7.87831	3.33807	2.36014	5.26e-08	99	130
MTFMT	0.0144116	0.00326188	4.41819	1.06e-06	44	20
MTFP1	4.54258	2.10757	2.15536	5.57e-06	98	123
MTM1	0.522549	0.169609	3.0809	1.15e-10	98	112
MTMR10	0.107162	0.0338214	3.16847	4.68e-11	87	69
MTMR11	0.0922188	0.00202842	45.4633	4.03e-08	43	15
MTMR12	0.164516	0.0541419	3.03862	2.32e-10	96	96
MTMR2	0.0551832	0.0267398	2.06371	9.92e-06	85	84
MTMR9	0.102805	0.0432847	2.37509	4.79e-08	89	87
MTPAP	0.0955253	0.0419232	2.27858	1.49e-08	89	84
MTRR	0.0634793	0.0305044	2.08099	2.43e-11	74	45
MTX3	0.198755	0.0571277	3.47913	1.95e-09	85	74
MUL1	0.0741284	0.0125713	5.89665	0.000267664	48	35
MUT	2.68157	1.10905	2.4179	2.86e-10	99	129
MYCBP	4.94542	1.95697	2.52709	0.000420156	95	116
MYEF2	1.04434	0.472911	2.20832	5.13e-10	99	122
MYO19	0.0353204	0.0173435	2.03653	1.56e-12	77	45
MYO5C	0.0217749	0.00844594	2.57816	0.0132544	47	42
MYO6	2.4208	1.10941	2.18206	7.18e-14	99	132
MYO7A	0.0661539	0.0117277	5.64081	7.37e-12	75	44
MYO7B	0.216173	0.0409898	5.27384	2.12e-07	73	59
MYO9A	0.0190012	0.00848211	2.24015	3.07e-13	87	61
MZF1	0.00804394	0.000687143	11.7064	4.94e-09	44	14
MZT2B	0.213744	0.0910326	2.348	0.00128007	41	29
N6AMT1	0.0572664	0.0271519	2.10911	1.96e-06	62	43
NAA30	0.0777462	0.0331798	2.34317	5.93e-08	72	51
NAA40	0.0152821	0.00540684	2.82644	3.68e-07	56	32
NAA50	0.788099	0.342717	2.29956	5.13e-09	99	122
NACC1	0.0170134	0.00729256	2.33299	7.35e-07	56	32
NAGLU	0.469596	0.136571	3.43849	9.87e-07	99	125
NANS	12.4739	4.96733	2.5112	1.66e-12	99	133
NAPRT1	2.71025	1.15505	2.34644	1.21e-12	99	131
NARFL	0.304814	0.0924434	3.29731	2.98e-12	87	66
NAT1	0.160134	0.0597616	2.67955	6.32e-08	83	74
NAT8	6.46168	1.23546	5.23018	2.31e-13	98	106
NBEA	0.0497611	0.0220314	2.25865	4.41e-13	94	86
NCK2	0.793319	0.359662	2.20573	2.44e-06	99	125
NCOA7	0.0720685	0.0213937	3.36868	4.64e-09	81	67
ND1	0.637551	0.257251	2.47832	2.06e-05	89	96
ND2	1.89108	0.63702	2.96863	0.000470996	95	121
ND4	0.382045	0.187881	2.03344	3.28e-06	96	111
NDC1	0.157574	0.0480044	3.2825	2.6e-10	72	44
NDNL2	0.0285206	0.00915624	3.11488	8.69e-05	65	55
NDRG2	0.947816	0.251049	3.77542	3.31e-10	94	100
NDUFA11	1.27348	0.48066	2.64944	0.0313424	91	115
NDUFA12	3.68733	1.00605	3.66516	1.54e-07	99	129
NDUFA13	7.90283	2.96806	2.66262	4.06e-08	99	131
NDUFA2	2.05351	0.99944	2.05466	0.0018753	98	132
NDUFA3	1.16348	0.309634	3.75761	0.0471243	54	56
NDUFA4	10.8151	2.26947	4.76547	0.00133667	96	125
NDUFA5	12.525	3.71307	3.37322	4.35e-08	99	132
NDUFA6	1.6098	0.528418	3.04644	3.19e-08	98	118
NDUFA7	2.53993	0.275756	9.21078	1.58e-06	72	57
NDUFA8	2.66072	1.18945	2.23694	0.000272025	99	131
NDUFAB1	10.3803	3.29353	3.15173	1.28e-10	99	130
NDUFAF1	0.119856	0.00922451	12.9932	8.37e-08	43	17
NDUFAF5	0.417107	0.157105	2.65495	1.49e-06	63	45
NDUFAF6	0.095929	0.0179311	5.34986	2.72e-16	72	29
NDUFAF7	0.390935	0.150719	2.59381	2.11e-08	91	95
NDUFB1	1.0522	0.397079	2.64985	0.0147764	67	71
NDUFB10	3.2059	1.02271	3.13471	4.97e-07	99	125
NDUFB11	0.238042	0.113689	2.09379	0.00257958	84	94
NDUFB3	1.81001	0.798202	2.26761	0.00119645	96	121
NDUFB4	3.74787	1.69269	2.21415	0.000761279	98	121
NDUFB5	3.64516	1.03045	3.53744	1.36e-06	99	126
NDUFB6	1.04072	0.466682	2.23004	2.35e-05	98	123
NDUFB7	1.04837	0.32954	3.1813	0.000105858	91	106
NDUFB9	12.4464	4.35409	2.85856	2.2e-10	99	131
NDUFS1	4.35814	1.45566	2.99392	7.12e-08	99	132
NDUFS3	7.56449	3.03649	2.49119	5.43e-08	99	132
NDUFS4	1.55679	0.654659	2.37802	9.05e-07	99	123
NDUFS5	3.16781	1.52618	2.07564	0.000219425	99	128
NDUFS6	0.63352	0.218472	2.89977	0.000327462	89	102
NDUFS7	4.67737	2.186	2.13969	1.59e-07	99	130
NDUFS8	2.64487	1.24868	2.11813	1.15e-08	99	131
NDUFV1	1.88471	0.725741	2.59694	6.29e-06	99	131
NEBL	0.485128	0.090052	5.3872	3.82e-18	93	71
NEDD4L	0.43907	0.190955	2.29934	1.87e-10	97	104
NEK1	0.0180061	0.00813962	2.21215	0.0025904	39	26
NEO1	0.268863	0.0824213	3.26206	6.01e-12	85	60
NF1	0.0817103	0.0385501	2.11958	2.46e-07	97	106
NFS1	0.388846	0.134567	2.88961	6.43e-11	97	102
NFU1	2.31093	1.03517	2.23242	5.53e-08	99	121
NGEF	0.048359	0.00877263	5.51248	2.52e-05	45	27
NHEJ1	0.131864	0.061405	2.14745	1.69e-06	87	87
NIF3L1	1.24528	0.596575	2.08739	4.24e-11	99	129
NIPSNAP1	12.0924	4.55908	2.65238	7.59e-17	99	133
NIPSNAP3B	0.241492	0.0437294	5.52242	0.000335016	36	22
NKIRAS2	0.216229	0.103868	2.08176	9.82e-08	85	74
NLE1	0.170018	0.0702494	2.4202	0.000235003	72	66
NME3	2.26155	1.09777	2.06013	6.01e-09	99	128
NMNAT1	0.534152	0.266748	2.00246	2.3e-09	99	125
NMNAT3	0.129713	0.0428235	3.02901	4.65e-14	81	50
NMRAL1	0.21294	0.0974019	2.1862	1.37e-12	91	78
NMRK1	0.0883426	0.0407332	2.16881	1.86e-07	77	62
NMT1	2.05969	0.966905	2.13019	4.45e-07	99	131
NMT2	0.262237	0.126898	2.06652	1.65e-09	92	89
NNT	13.2961	3.09016	4.30271	7.58e-10	99	132
NOC3L	0.22928	0.0860952	2.6631	2.36e-09	94	97
NOP14	0.10945	0.0396798	2.75833	0.000318545	73	72
NOSIP	0.136049	0.0664538	2.04728	1.21e-05	70	58
NOSTRIN	0.304937	0.0871588	3.49863	1.61e-13	95	91
NPC2	4.26461	1.62237	2.62863	5.07e-08	99	129
NPR3	0.201553	0.0316717	6.36381	1.33e-16	79	40
NPRL3	0.0389766	0.0111615	3.49205	1.47e-08	61	35
NQO1	0.508846	0.146236	3.47962	0.000218657	67	62
NQO2	1.45511	0.64739	2.24766	8.51e-07	96	118
NRCAM	0.0742544	0.00674797	11.004	0.000286751	40	25
NRIP2	1.0497	0.43449	2.41593	2.08e-07	90	90
NSDHL	0.581479	0.277734	2.09366	3.07e-09	99	124
NSMCE1	0.0550473	0.0126012	4.36841	0.0213768	41	37
NSMCE4A	0.0470367	0.00486436	9.66965	0.00135341	46	37
NSUN5	0.0488848	0.0195356	2.50235	0.000455759	59	50
NT5C	4.21927	1.98771	2.12267	5.2e-09	99	128
NTAN1	0.0389188	0.0156305	2.48993	0.00422308	53	48
NTN4	0.241082	0.0910847	2.64679	1.81e-09	87	77
NUBPL	0.265167	0.0651192	4.07202	1.62e-13	98	98
NUCKS1	0.484471	0.223753	2.1652	1.26e-11	93	85
NUDCD1	0.353285	0.103102	3.42656	3.17e-09	96	95
NUDT12	1.49083	0.294603	5.06046	1.71e-19	98	85
NUDT14	0.503746	0.193057	2.60931	4.58e-11	95	94
NUDT15	0.149004	0.0276786	5.38334	1.51e-09	64	37
NUDT18	0.0904359	0.040038	2.25875	2.85e-07	74	58
NUDT19	0.412283	0.149423	2.75917	3.25e-10	95	96
NUDT2	1.42487	0.704591	2.02227	2.6e-07	98	119
NUDT8	0.187469	0.0233255	8.03707	2.38e-07	49	24
NUDT9	0.312346	0.12233	2.55331	5.9e-09	95	99
NUFIP2	0.139384	0.0503579	2.76787	0.0375557	58	63
NUMB	0.319396	0.132535	2.4099	7.91e-09	98	117
OARD1	0.623961	0.220206	2.83353	2.01e-06	94	111
OAS1	0.355394	0.158776	2.23834	0.0017368	74	77
OAT	1.79029	0.697905	2.56523	4.66e-06	99	124
OCLN	0.090592	0.035735	2.53511	0.00377148	38	28
OGDH	15.1388	6.5962	2.29509	2.41e-09	99	132
OGDHL	5.15409	0.671001	7.68118	2.84e-10	93	95
OMA1	0.261465	0.113845	2.29668	1.58e-11	92	76
OPA1	2.00457	0.965895	2.07535	5.05e-12	99	132
OPA3	0.474014	0.154549	3.06707	4.75e-09	91	86
OPLAH	1.16065	0.406098	2.85807	3.66e-14	99	125
OPTN	1.04644	0.425969	2.45661	2.96e-06	96	120
OR4C16	0.127893	0.00583504	21.918	1.79e-11	52	17
ORC3	0.107499	0.0354456	3.03278	1.29e-07	83	77
OSBPL10	0.0867044	0.0426439	2.03322	1.18e-05	95	109
OSBPL11	0.077764	0.034806	2.23421	2.87e-10	95	93
OSCP1	0.139299	0.0609982	2.28367	3.18e-11	94	87
OSGEP	0.337961	0.134866	2.50591	3.91e-09	96	108
OSGEPL1	0.0898425	0.0180168	4.98661	1.17e-11	78	50
OTUD7A	0.0209056	0.00403594	5.17985	0.0485355	34	35
OXCT1	9.77308	0.567599	17.2183	3.74e-14	99	129
PACS1	0.242868	0.115798	2.09734	3.97e-08	99	119
PACS2	0.0724066	0.024004	3.01644	3.35e-07	74	60
PACSIN2	2.57721	1.27366	2.02347	1.65e-08	99	131
PAFAH1B2	9.60448	4.74548	2.02392	7e-12	99	133
PAK1	0.372657	0.180686	2.06245	5.62e-09	96	104
PALM3	0.169212	0.0399095	4.2399	3.39e-16	90	67
PALMD	0.033784	0.0127758	2.64438	0.00545371	57	55
PAPLN	0.283221	0.0643985	4.39794	6.03e-05	84	93
PAPSS1	1.11422	0.545661	2.04196	2.65e-06	99	121
PARD6B	0.105228	0.0387685	2.71427	1.79e-15	80	42
PARG	0.00954727	0.00464714	2.05444	0.0142725	41	36
PARN	0.681467	0.253934	2.68364	4.66e-09	91	88
PARS2	0.427766	0.159565	2.68082	5e-12	93	82
PAX8	0.0498149	0.0212589	2.34325	2.27e-06	51	29
PBLD	14.6981	4.86124	3.02352	5.43e-12	99	124
PC	3.98268	1.11129	3.58382	9.25e-13	99	125
PCBD1	14.8013	6.62601	2.23381	1.82e-08	99	127
PCBD2	1.20549	0.438661	2.74812	1.91e-11	99	106
PCCA	4.1596	1.19812	3.47178	5.95e-11	99	131
PCCB	6.62089	1.23238	5.37243	3.85e-16	99	132
PCID2	0.240676	0.113653	2.11764	2.94e-05	90	100
PCIF1	0.13219	0.0629686	2.0993	0.000375658	87	101
PCK1	1.79078	0.278747	6.4244	5.3e-10	83	69
PCK2	21.3959	2.02105	10.5866	3.73e-13	99	133
PCM1	0.0826294	0.0376386	2.19533	6.81e-06	98	119
PCYT1A	6.36512	2.6982	2.35903	2.6e-07	99	129
PCYT2	0.603632	0.272102	2.21841	4.31e-13	99	109
PDCL3	0.481705	0.240638	2.00178	4.28e-08	99	117
PDDC1	0.917773	0.455664	2.01415	2.8e-09	99	127
PDE12	0.483715	0.190308	2.54175	4.55e-07	98	123
PDF	0.282356	0.105721	2.67076	3.78e-16	91	70
PDHA1	13.5758	3.78815	3.58377	8.99e-11	99	132
PDHB	16.7194	5.69537	2.93561	2.36e-11	99	131
PDHX	2.31677	0.763241	3.03544	3.58e-12	99	123
PDK2	1.5645	0.595305	2.62806	2.72e-14	99	111
PDK4	0.138174	0.0385496	3.58431	5.66e-09	67	43
PDLIM2	0.953262	0.370955	2.56975	6.12e-05	97	122
PDP1	0.703287	0.288616	2.43675	3.27e-09	99	125
PDPK1	0.34815	0.153591	2.26673	8.71e-11	85	67
PDPR	0.721122	0.299322	2.40919	1.97e-10	99	131
PDSS2	0.0748025	0.0146132	5.11882	7.08e-09	64	37
PDXDC1	0.617186	0.243825	2.53127	1.13e-09	99	126
PDZD11	0.939137	0.375851	2.4987	1.8e-13	96	88
PDZD8	0.0311648	0.0126439	2.46481	0.00439758	67	69
PDZK1	7.12973	2.05643	3.46704	6.97e-11	98	121
PDZK1IP1	0.392316	0.16092	2.43795	1.06e-07	45	17
PEBP1	283.235	72.9689	3.88159	4.86e-28	99	133
PECR	3.27905	0.764288	4.29033	3.23e-14	99	109
PET112	0.263144	0.0644844	4.08073	1.09e-08	78	61
PEX1	0.112802	0.0221944	5.08244	1.71e-15	90	67
PEX11G	0.0682726	0.0232402	2.93769	7.32e-05	60	48
PEX14	0.18931	0.0604307	3.13268	2.65e-08	80	65
PEX16	0.0555098	0.0228917	2.42488	0.012596	62	63
PFAS	1.05104	0.468776	2.24209	9.67e-12	99	133
PFKFB2	0.502133	0.0548578	9.15335	0.00839517	66	74
PFKL	35.6406	16.5787	2.14978	1.06e-17	99	133
PFKM	11.0155	4.82409	2.28344	3.63e-16	99	133
PGGT1B	0.329114	0.136383	2.41316	0.001362	85	98
PGK1	836.185	401.87	2.08074	2.06e-13	99	133
PGK2	85.7476	23.7327	3.61306	1.92e-07	52	27
PGM3	1.42016	0.648501	2.18991	7.04e-10	99	128
PGPEP1	0.316933	0.132252	2.39642	2.85e-09	96	107
PGRMC1	24.6641	12.2534	2.01284	3.49e-09	99	131
PGS1	0.100401	0.0485359	2.0686	5.61e-07	78	66
PHACTR4	0.0192455	0.00501241	3.83956	6.83e-09	69	48
PHB2	30.1429	13.3592	2.25633	1.95e-12	99	133
PHF1	0.0821578	0.0287757	2.85511	2.66e-06	77	66
PHF10	0.158198	0.0526626	3.00399	5.6e-07	61	41
PHF15	0.0495294	0.0226829	2.18356	5.17e-06	68	51
PHF3	0.0154398	0.00728962	2.11805	8.12e-05	75	71
PHKB	0.804352	0.278621	2.88691	2.36e-11	99	128
PHYH	0.41554	0.0868283	4.78577	8.04e-19	80	36
PHYHD1	0.270522	0.0887477	3.04821	0.00954735	43	38
PHYHIPL	0.461406	0.0358744	12.8617	2.97e-17	75	33
PI4K2B	0.00871323	0.00355767	2.44914	1.51e-06	58	36
PI4KB	0.0237342	0.0116263	2.04142	2.56e-05	60	43
PIGR	0.734796	0.106472	6.90129	0.0135059	56	62
PIGX	0.0601926	0.0169011	3.56146	5.98e-07	52	28
PIH1D1	0.212203	0.0882456	2.40469	6.17e-05	85	86
PIK3AP1	0.261943	0.0987641	2.6522	0.000161012	78	80
PIK3CA	0.258825	0.016521	15.6664	1.23e-06	76	64
PIK3R2	0.119839	0.0279904	4.28143	6.44e-07	65	41
PIKFYVE	0.0116542	0.00438459	2.658	0.000511191	52	38
PIN1	3.24321	1.54985	2.0926	1.81e-06	98	130
PIP4K2C	2.26481	0.981487	2.30753	1.1e-10	99	121
PIPOX	1.00299	0.143694	6.98001	4.3e-09	72	52
PIR	0.497297	0.185939	2.67452	5.09e-08	96	102
PISD	0.193056	0.0726125	2.65872	3.32e-05	80	77
PITPNC1	0.0805253	0.0196619	4.0955	2.38e-09	59	30
PKLR	41.7846	20.3315	2.05516	9.99e-05	95	119
PKP2	0.0746263	0.0309014	2.41498	7.93e-11	79	54
PKP4	0.459115	0.137888	3.32962	1.78e-16	99	112
PLCB3	0.130281	0.0614756	2.11924	0.00503118	95	118
PLCD1	0.305332	0.142278	2.14602	1.77e-08	95	97
PLCG1	0.142988	0.0569562	2.51049	2.06e-06	96	105
PLCL1	0.123009	0.0052203	23.5635	3.52e-07	53	33
PLD1	0.0493128	0.0194292	2.53808	0.0323548	52	55
PLEKHA5	0.569716	0.237849	2.39528	3.59e-12	99	119
PLEKHA6	0.264174	0.0795386	3.32133	1.07e-14	97	100
PLEKHA7	0.299697	0.078302	3.82745	4.02e-16	98	107
PLEKHG3	0.0240406	0.00771902	3.11446	5.41e-05	47	30
PLIN2	21.5429	10.2303	2.1058	0.0140895	94	130
PLXNB1	0.0127215	0.00139624	9.11126	7.59e-07	46	23
PM20D2	0.211543	0.0895442	2.36244	2.53e-12	94	85
PMPCA	0.840924	0.371103	2.26601	4.2e-10	99	123
PMPCB	0.731062	0.332463	2.19893	1.83e-08	99	125
PNCK	0.321224	0.104582	3.0715	0.0126358	44	40
PNKD	0.355059	0.171756	2.06722	0.00587156	66	64
PNP	21.7785	9.09587	2.39433	6.38e-15	99	133
PNPLA4	0.0748138	0.0123329	6.06622	1.44e-10	52	16
PNPLA8	0.105501	0.0477448	2.20967	9.07e-14	94	77
PNPT1	0.806604	0.328238	2.45738	1.03e-09	99	130
POFUT1	0.966011	0.348259	2.77383	2.8e-09	99	128
POLG	0.0803949	0.0372696	2.15712	2.27e-07	79	67
POLG2	0.150897	0.0489759	3.08104	1.11e-11	79	53
POLR1B	0.116723	0.0507072	2.3019	0.000800867	72	67
POLR1D	0.376761	0.0824783	4.56801	0.000140297	62	52
POLR2B	0.56556	0.24944	2.26731	6.63e-09	99	126
POLR2I	0.117257	0.0582364	2.01346	1.31e-08	78	59
POLR3A	0.0163272	0.00736083	2.21812	1.41e-05	60	44
POLR3F	0.0356705	0.0140221	2.54388	1.31e-08	71	49
POLRMT	0.0161181	0.00394143	4.0894	0.000136091	40	22
PPFIBP2	0.175443	0.0650469	2.69717	5.9e-08	85	79
PPOX	0.466615	0.168103	2.77577	3.5e-12	99	116
PPP1R12C	0.347003	0.136441	2.54325	1.24e-07	96	109
PPP1R16A	0.0416605	0.0109266	3.81275	1.07e-05	40	19
PPP1R37	0.0128876	0.00578865	2.22635	0.000193561	42	24
PPP2R1B	0.521111	0.253766	2.05351	0.00432017	56	53
PPP2R2D	0.289478	0.128855	2.24654	0.000139032	65	58
PPP2R3A	0.0298205	0.0131172	2.27339	0.00989962	56	54
PPP2R4	3.41066	1.69409	2.01326	1.58e-12	99	132
PPP2R5C	0.238192	0.0860005	2.76966	1.93e-06	81	77
PPP4R1	0.160326	0.0551164	2.90887	6.7e-10	97	115
PPP6C	1.19591	0.566955	2.10935	6.43e-06	99	128
PRCC	0.0591514	0.026968	2.1934	2.73e-05	70	59
PRCP	0.626979	0.287647	2.17968	4.11e-08	99	130
PRDX3	138.253	49.9022	2.77048	1.45e-12	99	133
PRKAA2	1.51812	0.447986	3.38876	1.43e-13	99	115
PRKAG1	2.98068	1.18181	2.52212	1.78e-08	99	129
PRKAG2	0.320968	0.135379	2.37089	0.000516805	66	63
PRKAR2B	0.809533	0.323318	2.50383	5.91e-05	84	90
PRKCZ	0.0219421	0.00376376	5.82984	1.68e-12	62	25
PRKD1	0.0822023	0.0229101	3.58804	8.27e-09	76	59
PRMT2	0.090968	0.0411592	2.21015	0.0436258	66	75
PRMT3	0.0315678	0.0120113	2.62818	0.0175215	38	33
PRODH	2.29131	0.599441	3.82241	1.88e-08	97	113
PRODH2	1.90064	0.513469	3.70157	1.18e-11	87	70
PROSC	3.39624	1.41706	2.39668	1.81e-15	99	132
PRPF6	2.51739	1.24091	2.02866	2.27e-08	99	129
PRPSAP1	2.10032	1.04036	2.01883	3.13e-12	99	133
PRPSAP2	1.5491	0.664542	2.33108	3.22e-12	99	130
PRRC2A	0.199813	0.0158048	12.6426	1.56e-08	88	79
PRUNE2	0.440935	0.196708	2.24157	6.21e-09	95	107
PSMA1	7.43197	3.62052	2.05273	6.46e-13	99	132
PSMA2	5.6658	2.57452	2.20072	1.55e-18	99	133
PSMA4	9.57184	4.77327	2.0053	2.08e-12	99	133
PSMB2	3.25715	1.48833	2.18847	1.17e-09	99	129
PSMB3	18.6499	7.52788	2.47745	3.14e-19	99	133
PSMB6	0.54942	0.135549	4.05329	0.00170216	68	69
PSMB7	0.417375	0.15881	2.62815	7.96e-10	94	94
PSMB8	3.72713	1.82113	2.0466	1.08e-09	99	132
PSME3	1.35331	0.587815	2.30227	1.02e-06	99	127
PSPH	1.58384	0.4429	3.57606	5.94e-12	99	115
PTAR1	0.0512337	0.0144956	3.53442	8.99e-10	75	51
PTCD3	0.408606	0.100108	4.08165	3.53e-11	99	117
PTEN	0.180743	0.0667743	2.70677	4.9e-08	68	45
PTER	5.30596	2.51371	2.11081	1.33e-07	98	126
PTGES2	0.779093	0.218702	3.56235	4.34e-13	99	127
PTGR1	15.6528	5.76739	2.71402	3.13e-08	98	129
PTGR2	1.96566	0.639492	3.07379	1.72e-12	99	122
PTMS	17.1698	8.25893	2.07893	5.61e-08	97	114
PTPN13	0.0720461	0.00328842	21.909	1.04e-07	53	27
PTPN14	0.0239616	0.0116306	2.06022	0.000637287	69	66
PTPN23	0.388204	0.167294	2.32049	3.42e-06	99	131
PTPRA	0.294839	0.129387	2.27874	2.83e-08	98	115
PTPRG	0.251412	0.107862	2.33086	1.98e-08	95	97
PTPRM	0.383617	0.141768	2.70595	2.54e-16	99	100
PTPRS	0.0151858	0.00265639	5.71669	9.13e-05	40	23
PTPRU	0.0349762	0.016782	2.08415	1.54e-05	65	53
PTRH1	0.254821	0.0895091	2.84688	0.00128838	57	52
PTS	0.117215	0.0167613	6.99318	6.23e-13	64	28
PURA	2.70653	1.21359	2.23019	1.44e-10	99	130
PUS7	0.0860424	0.0392298	2.19329	3.47e-07	79	67
PWP1	0.202266	0.0908771	2.22571	2.67e-10	95	97
PXMP2	0.0762648	0.019818	3.84827	6.19e-10	57	24
PYGM	1.87912	0.793694	2.36757	9.66e-05	84	88
PYROXD1	0.20638	0.0881656	2.34082	6.27e-09	69	41
PYROXD2	0.121398	0.0323677	3.75058	1.33e-08	60	32
QDPR	9.74452	3.58278	2.71982	2.29e-11	99	131
QPRT	5.76165	1.42443	4.04489	4.06e-07	95	113
RAB11A	6.61925	1.7298	3.82659	4.03e-08	53	26
RAB11FIP2	0.0762347	0.0125063	6.0957	1.33e-05	55	39
RAB11FIP3	0.12872	0.0250295	5.14274	3.49e-17	87	60
RAB11FIP5	1.04115	0.388686	2.67865	2.44e-10	99	126
RAB17	0.583497	0.195289	2.98786	7.05e-09	89	87
RAB19	0.233671	0.105524	2.21438	2.12e-06	72	58
RAB20	0.245471	0.119137	2.06041	0.000449447	81	86
RAB36	0.0320702	0.00812744	3.94592	5.93e-07	44	18
RAB38	0.42303	0.128416	3.29422	0.000111784	61	50
RAB3IL1	0.132987	0.0261017	5.09496	5.01e-09	59	31
RAB3IP	0.120244	0.0341515	3.52089	1.54e-12	77	48
RAB7L1	1.70497	0.484529	3.51883	3.42e-11	97	102
RABGAP1	0.085281	0.0424826	2.00743	1.86e-07	97	114
RABL3	0.968208	0.414998	2.33304	3.9e-13	99	106
RALBP1	0.0222684	0.0103294	2.15583	0.0445126	42	42
RALGAPA1	0.100636	0.0179237	5.61467	1.29e-14	96	88
RAP1GAP	0.035671	0.00415519	8.58469	2.01e-08	46	19
RAPGEF2	0.0908611	0.039224	2.31647	0.0163187	74	84
RAPGEF6	0.0122055	0.00538481	2.26664	0.000225879	65	55
RARS2	0.0874232	0.0266209	3.28401	5.73e-13	89	75
RASSF4	0.0836193	0.0302219	2.76685	5.25e-06	68	52
RBBP5	0.211583	0.0985816	2.14628	2.21e-07	93	98
RBBP9	1.51276	0.49398	3.06238	2.19e-14	99	108
RBKS	2.85945	1.3611	2.10083	4.28e-07	98	124
RBM15B	0.0204306	0.00988707	2.0664	0.00735512	36	25
RBM25	13.5465	1.59144	8.51208	1.82e-15	98	129
RBM3	3.23902	1.61428	2.00649	6.7e-10	98	107
RBM34	0.283974	0.140956	2.01462	0.000664702	44	32
RBM45	0.0323879	0.015322	2.11382	1.52e-05	59	41
RBM47	1.24772	0.427426	2.91914	1.87e-11	99	117
RBMS1	0.669473	0.302898	2.21023	0.00191118	82	91
RBMS2	0.303704	0.11853	2.56227	2.3e-05	57	40
RBMXL1	1.70742	0.845544	2.01932	3.2e-12	97	92
RBP5	13.7116	5.08596	2.69598	1.53e-09	99	122
RBP7	1.1662	0.538592	2.16527	1.54e-05	79	74
RBPMS2	0.102151	0.0138487	7.37621	7.51e-08	43	15
RCBTB2	0.0406227	0.0107156	3.791	0.000793413	54	46
RCOR1	0.129877	0.0497192	2.61221	0.00146027	67	68
RCOR3	0.132201	0.0512893	2.57756	4.02e-06	68	55
RDH11	1.09072	0.273894	3.98228	1.93e-05	97	119
REPS2	0.025763	0.0116231	2.21654	2.74e-08	55	26
RETSAT	0.907806	0.298665	3.03955	4.75e-11	99	118
RGL1	0.00913909	0.00274925	3.32421	5.2e-07	52	28
RGN	1.09439	0.232236	4.71242	3.5e-15	98	100
RHPN2	0.276531	0.108395	2.55113	2.92e-12	94	93
RICTOR	0.0186175	0.00432466	4.30496	3.93e-13	76	45
RILP	0.0730803	0.0217146	3.36549	3.49e-17	84	49
RILPL2	0.590353	0.226015	2.612	0.0171299	36	29
RING1	0.295033	0.137568	2.14462	1.06e-09	97	103
RMDN2	0.204863	0.0780908	2.6234	3.21e-07	94	105
RMND1	0.344213	0.143305	2.40196	6.36e-07	96	115
RNASEL	0.0728825	0.0164378	4.43383	4.63e-06	82	80
RNF113A	0.0266682	0.0128494	2.07544	0.0032046	44	36
RNF126	0.0556777	0.0265371	2.09811	5.48e-09	60	30
RNF14	0.55134	0.241243	2.28542	8.98e-06	93	107
RNF170	0.395904	0.177408	2.2316	2.35e-07	88	86
RNF214	0.0263162	0.0123729	2.12691	0.00399218	59	53
RNLS	0.20064	0.0605905	3.31141	5.91e-12	72	40
RNMT	0.959421	0.422245	2.27219	2.6e-06	97	112
RNMTL1	0.0572192	0.0134195	4.26389	0.000163077	39	24
ROGDI	0.0531542	0.00982075	5.41244	1.69e-10	72	47
RPL26	2.26708	1.03513	2.19014	1.27e-10	94	92
RPL26L1	0.814115	0.299378	2.71936	8.14e-15	81	48
RPL3	1.81394	0.89271	2.03194	9.48e-11	99	131
RPL35	1.68451	0.485562	3.46921	1.79e-13	91	73
RPP25L	0.0508935	0.0212959	2.38983	0.0407803	33	28
RPRD1A	0.429431	0.184602	2.32626	1.84e-10	98	110
RPS23	2.04294	0.796886	2.56366	4.29e-08	97	122
RPS29	0.400262	0.18811	2.1278	0.000818085	49	38
RPS6KA1	0.286601	0.142508	2.01112	8.17e-08	98	118
RPS6KA4	0.0479139	0.0237614	2.01646	0.0164824	71	76
RSPRY1	0.0214215	0.0100868	2.12371	0.00630939	36	28
RTN4IP1	0.642696	0.182146	3.52846	4.08e-12	94	97
RUFY2	0.22118	0.0579968	3.81366	3.21e-13	97	96
RUFY3	0.19139	0.084726	2.25893	2.39e-09	90	87
RXRB	0.0681958	0.0308362	2.21155	0.00604395	61	61
S100A6	22.8129	9.12922	2.49888	8.6e-08	99	132
SAMM50	4.84093	1.84371	2.62565	5.29e-12	99	132
SARDH	0.68754	0.099904	6.88201	2.03e-09	91	90
SARS2	0.638104	0.26585	2.40024	2.07e-08	99	122
SAT2	0.276542	0.0752641	3.67429	2.32e-06	73	61
SCAF4	0.0249528	0.0084121	2.9663	0.0153927	46	42
SCARB1	2.13127	1.04971	2.03034	0.00416214	95	121
SCCPDH	2.96578	1.41225	2.10004	4.18e-09	99	130
SCGN	19.073	8.27224	2.30566	0.000268491	85	92
SCLY	0.53621	0.175098	3.06234	2.74e-14	99	111
SCO2	0.0604446	0.0220739	2.73828	3.36e-07	47	20
SCRN2	2.14296	0.748218	2.86409	1.41e-12	99	127
SDCBP	0.875781	0.38139	2.29629	0.00381693	97	123
SDHA	15.8039	4.68341	3.37445	5.79e-14	99	132
SDHB	15.021	5.78693	2.59568	1.6e-09	99	132
SDPR	1.22607	0.531301	2.30767	7.12e-10	99	115
SDR39U1	0.295484	0.0282979	10.4419	1.97e-19	81	41
SDSL	0.732145	0.343727	2.13002	6.12e-09	93	94
SELENBP1	8.58659	3.15095	2.72508	3.26e-12	99	133
SELRC1	0.0612252	0.0217162	2.81933	0.00083076	40	27
SEPHS2	1.47238	0.407406	3.61403	9.75e-17	99	104
SEPN1	0.023668	0.0082818	2.85783	0.00504116	36	25
SEPSECS	0.386248	0.15073	2.56252	2.07e-14	99	107
SESTD1	0.0185027	0.00593752	3.11624	1.76e-05	52	34
SETD1A	0.0100945	0.00382263	2.64073	2.76e-08	73	52
SETD3	0.461099	0.199273	2.3139	1.55e-10	99	126
SFXN1	13.5463	6.23575	2.17236	4.69e-11	99	132
SFXN2	1.44205	0.231746	6.22253	4.78e-09	94	103
SFXN4	0.358559	0.11303	3.17224	3.84e-09	87	80
SFXN5	1.12482	0.350143	3.21244	0.000134613	71	66
SH3BGRL2	1.66594	0.632525	2.63379	8.54e-10	97	110
SH3GLB2	0.915835	0.423218	2.16398	4.49e-08	98	117
SH3TC1	0.00491242	0.00238812	2.05703	0.0252427	36	31
SHMT1	25.0341	7.12295	3.51457	2.95e-21	99	133
SHMT2	17.261	7.32139	2.35761	4.24e-09	99	132
SHPK	0.389811	0.183658	2.12248	2.6e-11	99	113
SHROOM2	0.0126461	0.0020382	6.20454	3.5e-05	43	25
SHROOM4	0.0666172	0.0108194	6.1572	1.75e-07	49	25
SIAE	0.856419	0.315818	2.71175	4.9e-10	99	120
SIGIRR	0.0653402	0.0155492	4.20215	1.21e-05	61	48
SIPA1L1	0.030724	0.0109262	2.81195	7.38e-07	71	54
SIPA1L2	0.0271428	0.00767609	3.53602	1.05e-05	55	41
SIPA1L3	0.107101	0.0124977	8.56962	1.39e-05	50	33
SIRT3	0.558615	0.225966	2.47211	4.08e-12	95	90
SIRT5	1.01725	0.3803	2.67486	1.73e-11	99	118
SLAIN2	0.122037	0.0402273	3.03368	1.92e-05	74	70
SLC12A2	0.0657159	0.0280876	2.33968	0.000302405	82	88
SLC12A4	0.133579	0.0612881	2.17952	0.00191533	79	91
SLC12A7	0.299723	0.117412	2.55276	6.37e-11	99	118
SLC16A4	0.0155094	0.00606384	2.55769	1.4e-09	56	24
SLC16A7	0.0334175	0.00925947	3.609	0.0347869	36	32
SLC17A3	0.134859	0.0337833	3.99188	9.16e-06	46	25
SLC17A5	0.0998189	0.0372095	2.68261	9.17e-05	72	66
SLC1A1	0.155095	0.0733076	2.11568	1.1e-12	94	82
SLC22A11	0.246414	0.0683527	3.60503	7.59e-17	85	52
SLC22A2	0.265572	0.0849171	3.12743	3.32e-10	83	66
SLC22A5	0.0681482	0.0113768	5.99012	3.61e-12	72	42
SLC25A10	0.867984	0.39076	2.22127	6.66e-10	96	101
SLC25A11	10.6319	4.94304	2.15088	7.38e-10	99	132
SLC25A12	2.79674	1.32185	2.11578	2.3e-08	99	132
SLC25A13	5.24483	2.44372	2.14625	9.33e-10	99	132
SLC25A23	0.0486242	0.00923947	5.26266	9.81e-09	49	18
SLC25A30	0.184813	0.0266832	6.92619	2.73e-07	64	47
SLC25A4	23.6715	7.21302	3.28178	6.95e-13	99	132
SLC25A40	0.182962	0.0804674	2.27374	4.83e-06	83	77
SLC25A5	61.7363	15.1481	4.07553	1.36e-08	99	132
SLC25A6	41.6375	14.0254	2.96872	9.4e-12	99	133
SLC27A2	2.01862	0.614174	3.28673	5.05e-12	97	114
SLC28A1	0.188726	0.031788	5.93702	3.24e-13	70	32
SLC2A2	0.555746	0.199461	2.78624	2.09e-07	83	74
SLC2A8	0.103228	0.0159462	6.47349	8.93e-08	53	28
SLC2A9	0.0557928	0.0234898	2.3752	2.47e-08	70	49
SLC35A3	0.599538	0.233351	2.56926	7.21e-09	91	91
SLC35B3	0.0433173	0.0205645	2.10641	0.000480414	48	35
SLC35B4	0.117302	0.0466009	2.51717	0.0162546	36	31
SLC35D1	0.0285596	0.0117856	2.42325	0.000325662	39	24
SLC39A7	0.0238905	0.0112649	2.12079	0.000652621	43	30
SLC3A1	1.12487	0.342303	3.28619	1.61e-12	98	110
SLC3A2	3.9701	1.96512	2.02029	0.02599	99	132
SLC44A3	0.102124	0.026833	3.80591	6.79e-08	71	54
SLC4A4	0.754494	0.137554	5.48507	7.02e-13	99	114
SLC5A1	0.694757	0.187832	3.69882	1.58e-06	62	44
SLC5A10	0.241319	0.0212814	11.3394	5.7e-10	67	40
SLC5A12	1.34191	0.159721	8.40157	2.4e-14	89	70
SLC6A12	0.148591	0.0573295	2.59188	4.13e-05	57	40
SLC6A19	0.436133	0.0557407	7.82432	4.67e-07	62	42
SLC9A3R1	6.7114	2.43279	2.75872	2.79e-11	99	132
SLCO2A1	0.463098	0.166157	2.78712	1.05e-05	84	77
SLIRP	2.79633	1.06263	2.63153	1.45e-08	91	84
SMARCD1	0.0200372	0.00988699	2.02662	0.00777377	51	46
SMC5	0.116054	0.0515967	2.24926	0.000433827	71	67
SMG5	0.0403685	0.0112729	3.58103	5.86e-05	71	64
SMG7	0.0195982	0.00949053	2.06503	0.0140181	37	29
SMIM1	0.757809	0.249436	3.03809	4.25e-07	59	36
SMIM20	2.37089	0.994453	2.38411	4.48e-07	97	113
SMPD1	0.0464732	0.0157757	2.94587	0.00013333	64	56
SMPDL3A	0.257768	0.117433	2.19503	1.15e-06	88	89
SMS	5.4241	1.79955	3.01415	6.48e-10	99	132
SMUG1	0.0905334	0.0336635	2.68936	0.00092773	48	38
SMYD2	0.0508566	0.0248807	2.04402	3.56e-05	49	30
SMYD3	0.106068	0.0164674	6.44107	2.83e-07	66	46
SNF8	0.834032	0.40928	2.0378	2.18e-05	99	122
SNRNP27	0.139645	0.0525315	2.65831	0.000581743	54	44
SNRPB2	0.757567	0.37455	2.0226	7.6e-11	99	112
SNRPF	0.253347	0.0565732	4.47822	1.99e-05	39	19
SNTA1	0.0894393	0.00813707	10.9916	8.85e-10	60	30
SNTB2	0.992772	0.4653	2.13361	2.65e-08	99	128
SNX13	0.0562917	0.0107489	5.23699	3.14e-09	71	43
SNX15	0.487096	0.0977128	4.98498	1.3e-08	90	83
SNX29	0.0997931	0.0316287	3.15514	2.05e-15	97	91
SNX30	0.264046	0.103789	2.54405	7.01e-12	97	103
SNX5	3.83232	1.70555	2.24697	5.81e-14	99	132
SOD1	85.151	39.1289	2.17617	1.17e-14	99	133
SORD	11.1015	1.63144	6.80474	2.16e-12	99	132
SOS1	0.0248571	0.00989195	2.51286	0.00404496	74	80
SOWAHC	0.113648	0.0335703	3.38538	2.6e-12	83	58
SPAG1	0.0134575	0.00540624	2.48925	7.33e-05	40	20
SPAG9	0.609048	0.274185	2.2213	4.68e-10	99	126
SPATA18	0.168489	0.0254073	6.63151	1.21e-10	71	46
SPATA20	0.332831	0.101731	3.27166	7.11e-07	95	115
SPATA5	0.265861	0.104099	2.55392	3.91e-11	94	93
SPG7	0.283476	0.0719338	3.94079	1.96e-10	97	113
SPIRE1	0.0259371	0.00996865	2.60186	5.58e-05	62	50
SPON1	0.117154	0.0275314	4.25529	0.0289568	45	46
SPON2	2.20664	0.489511	4.50784	7.17e-05	15	48
SPPL2A	0.136798	0.0655002	2.08851	6.72e-11	82	60
SPR	5.10494	1.70166	2.99997	1.96e-12	99	132
SPRYD4	2.41548	0.812498	2.9729	3.71e-10	99	127
SPTLC3	0.0189712	0.00707098	2.68297	1.2e-06	44	19
SRBD1	0.0910243	0.0323518	2.81358	9.76e-13	98	104
SRCAP	0.00287535	0.00125135	2.29779	0.0442784	33	30
SRP14	8.08978	3.84496	2.10399	3.3e-10	99	131
SSSCA1	0.876856	0.319228	2.74681	6.48e-05	92	105
STAG1	0.342891	0.14109	2.4303	0.00725553	93	116
STAP2	0.0656976	0.0117963	5.56933	1.31e-12	73	42
STARD10	0.491939	0.17046	2.88595	4.86e-11	91	81
STARD7	0.0440595	0.0161624	2.72605	1.17e-09	70	43
STK11IP	0.131871	0.0637379	2.06896	0.000128262	92	99
STOML2	3.47974	1.48923	2.3366	5.13e-10	99	132
STRN3	0.327206	0.158328	2.06663	6.62e-08	97	110
STUB1	0.367267	0.151652	2.42177	1.09e-11	99	116
STX17	0.122065	0.0472473	2.58353	2.92e-05	77	74
STX1A	0.195154	0.0600731	3.2486	0.000102231	38	21
STX3	0.59018	0.194367	3.03643	1.05e-11	98	107
STX7	5.17143	2.54781	2.02976	8.92e-09	99	132
STXBP1	0.244844	0.110503	2.21572	5.9e-11	99	109
STXBP4	0.0314958	0.00999075	3.15249	0.000375342	41	26
SUCLA2	4.21933	1.3485	3.1289	1.83e-13	99	132
SUCLG1	9.07225	2.05912	4.40589	2.44e-13	99	131
SUCLG2	16.8825	3.49926	4.82459	1.16e-09	99	132
SULT1C2	1.69121	0.430078	3.93234	3.83e-13	94	90
SUMO2	0.83429	0.344435	2.4222	5.03e-10	81	61
SUOX	0.684073	0.113334	6.03588	1.16e-11	96	96
SUPV3L1	0.479972	0.229416	2.09215	3.99e-09	99	123
SURF1	0.356555	0.0912394	3.9079	1.11e-08	97	109
SYNE2	0.501255	0.245986	2.03774	1.63e-09	99	130
SYNRG	0.195452	0.0946373	2.06527	2.47e-14	97	97
SZT2	0.0154708	0.00305353	5.06653	1.76e-15	78	41
TAB1	0.194802	0.0932564	2.08889	2.89e-09	99	123
TACC2	0.0157995	0.00697023	2.26671	0.000238644	44	29
TAF4	0.0137556	0.00676647	2.0329	5.84e-07	79	69
TAMM41	0.111689	0.0384389	2.90562	0.000178799	68	65
TANGO2	1.11889	0.317852	3.52016	4.69e-06	94	104
TATDN3	0.185402	0.0525002	3.53146	2.14e-14	96	90
TBC1D1	0.25704	0.0888524	2.89289	7.95e-06	93	96
TBC1D10A	0.0255217	0.011952	2.13535	5.31e-05	64	51
TBC1D22A	0.159299	0.0508647	3.13182	2.65e-05	80	83
TBC1D23	0.151139	0.0701578	2.15427	2.19e-09	96	104
TBC1D4	0.207463	0.0581238	3.56932	2.07e-13	97	106
TBC1D5	0.276055	0.127086	2.17218	3.87e-06	98	123
TBC1D9	0.0470012	0.0207437	2.26581	3.21e-10	87	72
TBCC	0.294764	0.136965	2.1521	8.03e-06	96	113
TBCE	0.274212	0.115253	2.37922	7.28e-08	98	117
TBCEL	0.205236	0.0970404	2.11496	0.000205704	82	86
TBRG4	0.553001	0.168483	3.28224	3.95e-09	98	122
TCF25	0.48294	0.160663	3.00593	4.54e-07	64	40
TDRD3	0.0136597	0.00297692	4.58854	0.000106024	38	20
TDRP	0.0878615	0.0161638	5.43569	0.00010639	40	24
TEAD1	0.0549758	0.0173635	3.16616	0.000575208	69	68
TEFM	0.0771013	0.0106368	7.24857	2.28e-07	56	34
TEK	0.0441098	0.0114765	3.8435	0.0336535	32	26
TEP1	0.0698419	0.0236183	2.9571	4.63e-10	94	99
TEX264	0.252981	0.123485	2.04867	0.00973921	61	59
TFAM	4.13451	1.90245	2.17325	5.53e-07	99	122
TFB1M	0.115837	0.0191123	6.06086	1.02e-07	55	30
TFB2M	0.217855	0.0822036	2.65019	2.65e-08	81	65
TFEB	0.416155	0.0163711	25.4201	0.0311963	42	37
TFIP11	0.256023	0.125904	2.03347	1.28e-09	98	105
TGFBRAP1	0.156683	0.0610823	2.56511	6.27e-11	96	98
THADA	0.00660717	0.0014988	4.40832	2.66e-05	48	29
THAP11	0.0498045	0.0238053	2.09216	3.42e-05	64	52
THEM4	0.0899121	0.0414388	2.16976	1.65e-05	69	57
THG1L	0.0330044	0.0124811	2.64435	0.0358587	45	44
THNSL1	0.331556	0.163747	2.02481	7.53e-11	98	113
THNSL2	0.142125	0.0447347	3.17708	5.93e-14	77	42
THYN1	0.617512	0.303396	2.03533	1.53e-08	99	126
TIAL1	0.800614	0.282896	2.83006	1.22e-10	99	115
TIMM10	0.97536	0.372123	2.62107	1.22e-09	98	110
TIMM10B	0.433427	0.179108	2.41992	0.000125495	73	64
TIMM13	8.54389	2.65897	3.21323	8.66e-12	99	130
TIMM17B	0.311018	0.0898271	3.46241	1.03e-10	86	72
TIMM21	0.300489	0.0458234	6.55755	5.94e-13	87	72
TIMM22	0.989568	0.386867	2.5579	0.000779328	91	111
TIMM50	1.47922	0.728934	2.02929	1.8e-08	99	125
TIMM8B	0.356482	0.105192	3.38889	0.000250428	56	46
TIMM9	3.68179	1.80916	2.03508	1.57e-06	98	119
TIMMDC1	0.327646	0.124267	2.63662	9.18e-12	97	98
TINAG	1.15062	0.201503	5.71019	2.39e-14	84	57
TJP2	0.313576	0.151251	2.07321	4.15e-08	98	122
TM7SF2	0.0895558	0.0221715	4.03923	1.37e-05	57	42
TMA16	0.311974	0.0906536	3.44138	0.0045496	61	60
TMED8	0.194736	0.0911556	2.1363	5.82e-09	81	63
TMEM102	0.23502	0.0607702	3.86736	1.12e-10	69	40
TMEM126A	0.690661	0.302071	2.28642	2.6e-08	97	107
TMEM127	0.0163197	0.00754789	2.16215	0.012648	34	26
TMEM132E	0.0318899	0.00318376	10.0164	5.86e-06	39	19
TMEM143	0.148206	0.0519665	2.85196	2.37e-08	66	39
TMEM147	0.0791223	0.039375	2.00945	0.00563046	58	55
TMEM14C	0.214801	0.0741815	2.89561	7.43e-06	70	59
TMEM168	0.027259	0.0101471	2.68639	0.0336051	55	57
TMEM186	0.0643736	0.0265617	2.42355	6.43e-05	40	22
TMEM192	4.62966	1.50866	3.06873	8.44e-06	93	111
TMEM199	0.136347	0.0476723	2.8601	0.000169769	61	52
TMEM223	0.148612	0.0540573	2.74915	1.38e-14	94	81
TMEM256	1.21796	0.428575	2.84188	0.000470921	85	92
TMEM27	0.736644	0.137018	5.37626	1.3e-15	88	65
TMEM57	0.121231	0.0347242	3.49125	1.44e-06	64	41
TMEM9B	0.0917342	0.0365687	2.50854	5.35e-06	50	29
TMLHE	0.996566	0.361482	2.75689	9.17e-12	99	119
TNIP1	0.296991	0.0361562	8.2141	0.0012363	79	85
TOM1L1	1.17455	0.339806	3.45653	9.75e-16	99	98
TOM1L2	0.436328	0.19679	2.21722	2.85e-10	99	112
TOMM40L	0.190113	0.075345	2.52324	0.000132406	86	94
TOX4	0.0757714	0.0314838	2.40668	2.39e-05	62	48
TP53RK	0.235267	0.0881805	2.66802	1.46e-06	88	93
TPK1	2.61923	0.784044	3.34067	1.04e-12	96	91
TPP1	15.6731	5.74465	2.7283	2.73e-16	99	133
TPPP	0.617291	0.146932	4.20119	2.93e-11	87	71
TPRG1L	0.422642	0.189928	2.22527	6.39e-07	90	94
TRAF2	0.0804217	0.0332524	2.41852	3.13e-06	84	86
TRAPPC8	0.414575	0.0921557	4.49863	4.79e-17	99	102
TRAPPC9	0.0913001	0.0422868	2.15907	1.95e-08	98	108
TRIAP1	0.292976	0.0843512	3.47329	6.1e-06	53	32
TRIM2	0.564223	0.16774	3.36367	1.74e-14	95	89
TRIM24	0.0379841	0.00772338	4.91807	0.000197122	46	32
TRIM32	0.0949367	0.0446796	2.12483	0.000243704	86	94
TRIM5	15.9091	7.73713	2.0562	0.00871273	90	108
TRIP6	0.955384	0.445325	2.14537	3.08e-05	99	126
TRMT10C	0.731394	0.280672	2.60587	3.75e-09	99	125
TRMT11	0.0696897	0.027348	2.54825	0.0156271	41	34
TRMT112	2.11173	0.573142	3.68448	0.000199464	94	115
TRMT5	0.123302	0.0616157	2.00114	1.55e-08	70	44
TRMT6	0.0727129	0.0165947	4.38169	0.00192574	41	33
TRMU	0.115474	0.0260889	4.42617	7.32e-07	45	20
TRPV4	0.0927014	0.0317077	2.92363	1.31e-10	75	51
TRUB1	0.187694	0.0407959	4.60081	8.75e-08	67	48
TSC1	0.0196497	0.00214556	9.15829	3.06e-12	57	17
TSC2	0.0769788	0.0131107	5.87146	2.71e-10	89	81
TSFM	0.789962	0.386829	2.04215	4.21e-07	99	114
TSNAX	1.53114	0.763575	2.00522	9.92e-10	99	126
TSPAN1	10.1691	0.527642	19.2727	0.00226143	74	78
TSPAN33	0.13701	0.023104	5.93014	1.58e-12	72	40
TSPAN6	0.223033	0.076824	2.90317	8.56e-08	84	74
TSSC4	0.805052	0.344922	2.33401	1.68e-07	95	106
TST	8.87938	2.97906	2.9806	1.4e-10	99	129
TSTD1	3.07003	1.06901	2.87185	2.06e-11	99	115
TTC21B	0.0267696	0.0109949	2.43473	1.46e-14	90	71
TTC28	0.0304638	0.00674489	4.51658	5.74e-10	87	76
TTC30A	0.0281952	0.00343143	8.21674	2.9e-06	47	25
TTC38	3.23695	1.18457	2.7326	1.59e-13	99	130
TTC39B	0.180794	0.0391595	4.61687	3.63e-13	94	91
TUBA8	14.4821	3.44975	4.19801	0.00278884	35	25
TUBB2A	29.3279	14.4253	2.03309	0.0102754	49	45
TUBB4B	67.354	33.3779	2.01793	0.00538296	83	96
TUFM	25.5054	9.18409	2.77713	1.34e-10	99	132
TWF1	3.42697	1.70685	2.00778	1.67e-07	99	131
TXN	260.629	121.648	2.14249	5.92e-16	99	133
TXN2	2.47276	0.658735	3.7538	3.51e-10	99	123
TXNDC15	0.079263	0.0226183	3.50438	3.4e-07	65	40
TXNDC9	0.170977	0.0845666	2.02181	5.8e-06	82	77
TXNRD2	1.29076	0.560857	2.3014	3.74e-08	99	124
TYK2	0.0307597	0.00789203	3.89756	0.00408523	48	39
UAP1L1	0.513435	0.191865	2.67602	4.03e-08	98	127
UBA52	15.4679	5.58882	2.76764	2.5e-05	44	25
UBAP1	0.0606652	0.0302926	2.00264	0.000118879	64	52
UBE2G2	0.288311	0.13227	2.17971	1.8e-07	81	70
UBE4B	0.0897685	0.0444395	2.02002	2.54e-08	91	88
UBL4A	1.07449	0.499977	2.14907	1.59e-06	94	104
UBL5	0.237115	0.0806939	2.93845	1.88e-06	61	44
UBL7	0.0496302	0.0189676	2.61658	7.07e-06	60	44
UBXN1	0.483181	0.205978	2.34579	3.28e-05	94	113
UBXN6	1.81144	0.851794	2.12661	7.38e-07	98	128
UCHL3	1.68417	0.755554	2.22905	4.96e-10	99	129
UGT1A6	13.0027	5.77391	2.25198	6.88e-06	96	119
UGT1A9	6.41277	2.88278	2.2245	9.88e-11	94	95
UGT2A3	5.51591	1.71276	3.22048	9.66e-11	97	113
UGT2B4	1.389	0.161583	8.59617	0.00172658	35	25
UGT2B7	11.1514	1.94751	5.72597	1.61e-09	95	108
UGT8	0.0306813	0.00576759	5.3196	1.44e-05	44	24
UHRF2	0.0581947	0.0100986	5.76267	1.34e-06	71	62
ULK3	0.12866	0.0442428	2.90804	6.12e-09	86	74
UNC13B	0.0620172	0.0155589	3.98597	6.88e-18	89	60
UNG	0.676998	0.251139	2.69571	0.0360736	37	34
UNK	0.00801636	0.00260594	3.07619	0.000886087	37	24
UPB1	0.557414	0.152338	3.65906	1.93e-11	84	69
UQCR10	6.30075	2.59621	2.4269	7.5e-05	99	129
UQCR11	0.265834	0.0873294	3.04403	0.000498371	45	32
UQCRB	6.51985	1.46028	4.46478	1.13e-05	98	128
UQCRC1	17.8634	4.07769	4.38076	2.3e-09	99	133
UQCRC2	28.3041	6.38903	4.4301	1.19e-08	99	132
UQCRFS1	5.65515	1.59373	3.54837	4.52e-09	99	131
UQCRH	11.3168	2.507	4.51406	0.000100515	99	132
URB2	0.0294882	0.014123	2.08795	7.43e-05	66	57
URI1	0.328631	0.109126	3.01148	1.27e-05	74	69
USH1C	0.229249	0.060214	3.80723	2.39e-12	77	47
USMG5	23.0656	7.93938	2.90521	0.00661641	95	121
USP19	0.0155636	0.00660586	2.35603	6.43e-06	69	55
USP25	0.0685745	0.025173	2.72413	2.07e-06	71	52
UXS1	0.143331	0.044219	3.24138	6.12e-05	75	70
VANGL1	0.0623534	0.0211515	2.94794	4.9e-06	50	28
VARS2	0.138823	0.0541179	2.56519	2.97e-12	92	75
VAV2	0.519325	0.231655	2.24181	3.64e-08	99	117
VCPIP1	1.28138	0.510978	2.50771	1.88e-09	99	113
VEZF1	0.0157802	0.00752015	2.09839	0.00235463	45	35
VIL1	1.85874	0.541754	3.43097	0.000194176	84	98
VPRBP	0.0558889	0.0274417	2.03664	2.13e-09	99	108
VPS13A	0.141417	0.0613896	2.3036	1.28e-10	98	121
VPS13D	0.0186298	0.00141579	13.1586	9.05e-06	44	23
VPS26B	6.51868	2.20317	2.95877	0.000795729	99	130
VPS33B	0.377636	0.177602	2.1263	9.35e-07	97	115
VPS4B	1.87904	0.768407	2.44537	4.04e-10	99	132
VWA8	0.475543	0.0933817	5.09246	5.35e-12	98	116
WBSCR22	0.02565	0.0092109	2.78474	0.000173671	44	28
WDR12	0.65526	0.326207	2.00872	7.08e-09	99	113
WDR13	0.321369	0.114084	2.81694	1.18e-10	97	100
WDR19	0.0255073	0.00652774	3.90752	3.67e-08	67	44
WDR20	0.0565041	0.00440023	12.8412	2.58e-05	38	20
WDR24	0.164133	0.0332968	4.92937	1.02e-10	87	75
WDR34	0.0468072	0.0044591	10.497	1.09e-06	48	27
WDR37	0.47397	0.213695	2.21797	8.99e-10	99	124
WDR4	0.0613435	0.0227575	2.69553	0.00452304	38	28
WDR41	0.24001	0.05066	4.73767	0.0314054	38	35
WDR45B	0.584969	0.271622	2.15361	9.05e-08	98	115
WDR46	0.0479644	0.021365	2.245	2.49e-06	51	28
WDR48	0.0842381	0.0383876	2.19441	2.53e-06	82	78
WDR59	0.0923503	0.0295052	3.12997	1.19e-14	91	74
WDR70	0.0931835	0.0268575	3.46955	6.68e-08	92	88
WDR82	0.578174	0.279391	2.06941	0.000430393	95	117
WDR91	1.40546	0.626106	2.24477	1.1e-08	99	128
WRAP53	0.0292144	0.0145683	2.00535	0.00207134	36	25
WWC1	0.0302844	0.00177571	17.0548	8.74e-08	43	16
WWC3	0.044098	0.0124426	3.5441	8.58e-08	79	66
WWOX	0.30246	0.139964	2.16099	2.16e-09	69	38
XIAP	0.194024	0.0550644	3.52358	6.91e-13	92	76
XRCC1	0.160547	0.0549935	2.91938	2.27e-10	92	89
XRN1	0.422207	0.167768	2.51662	6.06e-06	96	113
XYLB	0.437611	0.0621535	7.0408	7.56e-15	92	81
YLPM1	0.135705	0.0632161	2.14669	7.22e-08	97	109
YRDC	0.0308272	0.00919579	3.35231	1.32e-05	40	19
YTHDF1	0.0761882	0.0336731	2.26258	1.58e-05	76	71
YTHDF2	0.0553623	0.0264496	2.09312	4.11e-06	62	43
YY1	0.0701212	0.0266131	2.63484	0.000274242	59	49
ZADH2	0.297389	0.0532923	5.58034	4.62e-14	94	85
ZC3H4	0.0262593	0.0118644	2.21328	6.45e-07	82	76
ZC3HAV1L	0.643356	0.301512	2.13376	1.91e-07	96	111
ZDHHC13	0.0454245	0.0184371	2.46375	0.00107315	56	49
ZFAND2B	0.199994	0.0448911	4.4551	9.51e-06	76	72
ZFR	0.610652	0.223775	2.72886	2.46e-10	99	123
ZFYVE1	0.10695	0.0360577	2.96609	1e-06	72	56
ZFYVE19	0.116722	0.0447232	2.60987	9.72e-14	94	84
ZFYVE20	0.0343527	0.0163609	2.09968	0.00921274	57	53
ZFYVE26	0.0409904	0.0145564	2.81597	5.62e-06	74	63
ZMAT2	0.0851601	0.0355475	2.39567	8.62e-08	64	41
ZMYM3	0.038184	0.00827436	4.61474	0.0015398	37	24
ZMYND11	0.0276826	0.0136292	2.03112	5.72e-05	51	34
ZNF185	0.0545796	0.0123688	4.41268	2.16e-09	71	48
ZNF512	0.249711	0.0952035	2.62292	0.000491852	90	107
ZSCAN18	0.0729351	0.0116458	6.26278	3.85e-05	42	24

## Sheet: GP2_pathwyas
GP1 up-regulated pathways	p-value	q-value	source	external_id	members_input_overlap	members_input_overlap_geneids	size	effective_size			GP2 down-regulated pathways	p-value	q-value	source	external_id	members_input_overlap	members_input_overlap_geneids	size	effective_size
Metabolism	1.33807e-103	2.98256e-100	Reactome	R-HSA-1430728	AGL; PRKAG2; MOCS3; FDXR; ASS1; NDUFAB1; OGDH; PIK3CA; SPR; ITPKC; NDUFB7; SPTLC3; ABCD1; SCLY; ABCD4; SUMO2; MAN2C1; SLC25A5; PTGR1; PTGR2; AGXT2; GK; GBA2; CNDP2; L2HGDH; D2HGDH; PTEN; STARD7; HSD17B10; HSD17B14; BBOX1; MGST3; TPK1; TST; CHKB; LSS; MRI1; HNMT; RPS23; NMRAL1; PLEKHA5; MCCC2; MCCC1; ACO2; PISD; HLCS; GLYATL1; SLC22A5; SLC35B3; FTCD; GPX4; SLC22A2; PRODH2; SMS; NDUFAF5; NDUFAF7; N…	1595; 2806; 8824; 26275; 160428; 29958; 57017; 114884; 275; 9054; 4669; 5783; 51660; 54884; 443; 84274; 2937; 132789; 35; 622; 1728; 1807; 2744; 1384; 374291; 2194; 84836; 348158; 8424; 51109; 56922; 84532; 8647; 84869; 293; 9663; 111; 137872; 4259; 4144; 2653; 873; 501; 9489; 6611; 4724; 51422; 1632; 56898; 2108; 3032; 10455; 22977; 130; 6296; 7363; 5337; 4707; 10873; 3795; 144193; 79133; 2678; …	1972	1960			Complement and coagulation cascades - Homo sapiens (human)	3.25704e-61	1.3647e-58	KEGG	path:hsa04610	KNG1; CD55; CFB; VSIG4; MASP1; C8A; C8B; SERPING1; MASP2; C8G; F13A1; SERPINE1; MBL2; SERPINA1; C4BPA; C4BPB; CPB2; C9; C3; C2; FGG; C7; FGA; FGB; F13B; VTN; SERPINF2; CLU; F10; F11; F2; F5; CFH; CFI; F7; C1QC; C1QB; C1QA; C6; PLG; C5; ITGAM; C1S; C1R	629; 5265; 3075; 5648; 7448; 1604; 730; 3426; 1191; 732; 11326; 3684; 4153; 5054; 2243; 2244; 10747; 712; 713; 714; 715; 716; 717; 1361; 722; 718; 710; 727; 729; 2266; 731; 5340; 733; 735; 5345; 2147; 2153; 2155; 2159; 2160; 2162; 3827; 2165; 725	79	79
The citric acid (TCA) cycle and respiratory electron transport	4.46183e-49	4.97271e-46	Reactome	R-HSA-1428517	MPC2; LRPPRC; NDUFB9; MPC1; NDUFB7; NDUFB6; NDUFB5; NDUFB4; NDUFB3; NDUFB1; SCO2; UQCRH; UQCRB; NDUFAB1; OGDH; NDUFB11; NDUFB10; NDUFA11; NDUFA12; NDUFA13; GLO1; NNT; IDH2; ETFDH; COX6A1; L2HGDH; D2HGDH; UQCRFS1; UQCRC2; UQCRC1; NUBPL; COX6B1; PDHX; PDPR; SURF1; PDHB; COX6C; DLD; TIMMDC1; PDP1; DLAT; ECSIT; ACO2; ATP5S; NDUFAF5; NDUFAF7; NDUFAF6; NDUFAF1; ADHFE1; ME3; FH; NDUFV1; FAHD1; ETFA; NDU…	5166; 4725; 1743; 55066; 7384; 4967; 4700; 4706; 4719; 3419; 4728; 2110; 137872; 2271; 4191; 4707; 8801; 8802; 4722; 4711; 27109; 29796; 2109; 79944; 3945; 1327; 51660; 1351; 51300; 2739; 51103; 5162; 3421; 4696; 4715; 4724; 10975; 51295; 1329; 3418; 81889; 5164; 54704; 54205; 55471; 25874; 80219; 2108; 9167; 9377; 6834; 1738; 3420; 728294; 126328; 51079; 137682; 10128; 54539; 5160; 1737; 8050; 3…	173	173			Dengue-2 Interactions with Complement and Coagulation Cascades	1.3303e-43	2.78698e-41	Wikipathways	WP3896	KNG1; CD55; CFB; CPB2; SERPING1; MASP2; C8G; SERPINE1; APOA2; C1QB; SERPINA1; C9; C3; C2; C7; C6; FGB; F13B; SERPINF2; CLU; F10; F2; F5; CFH; F7; CFI; C1QC; MASP1; C1QA; PLG; C1S; C1R	3827; 629; 336; 3426; 5648; 5054; 730; 1191; 2155; 733; 735; 2153; 10747; 2159; 1361; 718; 717; 716; 714; 713; 712; 710; 3075; 5345; 5265; 5340; 2147; 715; 2244; 2165; 1604; 729	60	60
Respiratory electron transport	1.77746e-35	1.29861e-32	Reactome	R-HSA-611105	ETFA; NUBPL; COX5A; NDUFB9; UQCR10; UQCR11; NDUFB5; NDUFB4; NDUFB3; CYCS; NDUFA5; NDUFAF5; NDUFAF7; NDUFAF6; NDUFAF1; SCO2; UQCRH; COX6B1; UQCRB; LRPPRC; NDUFAB1; TIMMDC1; COX5B; NDUFA12; NDUFB11; NDUFB10; NDUFA8; NDUFB7; NDUFB6; NDUFA11; COX8A; NDUFA13; SURF1; COX6C; NDUFA6; NDUFA7; NDUFA4; ETFB; NDUFA2; NDUFA3; NDUFB1; COQ10B; NDUFV1; ETFDH; SDHA; COX4I1; ECSIT; COX6A1; COX7A2L; CYC1; NDUFS1; N…	4725; 7384; 4700; 4706; 4719; 80219; 4728; 2110; 10975; 4722; 29796; 2109; 1327; 1351; 51103; 4696; 4715; 4724; 51300; 51295; 1329; 54205; 55471; 2108; 9167; 9377; 4711; 6834; 126328; 51079; 137682; 10128; 54539; 7386; 374291; 4702; 6390; 4713; 7385; 55967; 4701; 4707; 6389; 4716; 9997; 7388; 4695; 1345; 4710; 4723; 79133; 4698; 1337; 4709; 4726; 7381; 80224; 1537; 4697; 1340; 4712	100	100			Complement and Coagulation Cascades	5.70205e-42	7.96386e-40	Wikipathways	WP558	KNG1; CD55; CFB; CPB2; SERPING1; MASP2; C8G; SERPINE1; C1QB; SERPINA1; C9; C3; C2; C7; C6; FGB; F13B; SERPINF2; CLU; F10; F2; F5; CFH; F7; CFI; C1QC; MASP1; C1QA; PLG; C1S; C1R	3827; 629; 3426; 5648; 5054; 730; 1191; 2155; 733; 735; 2153; 10747; 2159; 1361; 718; 717; 716; 714; 713; 712; 710; 3075; 5345; 5265; 5340; 2147; 715; 2244; 2165; 1604; 729	59	59
Mitochondrial translation	2.33038e-35	1.29861e-32	Reactome	R-HSA-5368287	MRPL24; MRPL27; MRPL20; MRPL23; TSFM; MRPL28; PTCD3; MRPS17; MRPS16; MRPS15; MRPS11; MRPL33; MRPL16; MRPS35; MRPS34; MRPS36; MRPS31; MRPS33; MRPL55; MRPS7; MRPL40; MRPL50; MRPL52; MRPL38; MRPL10; MRPL11; MRPL12; MRPL14; MRPL15; MRPS9; MRPL18; MRPS6; MRPS5; MRPS2; MRPS18B; MRPL39; MRPL4; MRPL2; MRPL3; MRPL1; MRPL9; MTFMT; MRRF; MRPS28; MRPS26; GFM1; MRPS24; MRPS25; MRPS22; DAP3; MRPS21; MRPL42; MR…	51069; 55052; 64969; 54534; 10573; 51021; 7818; 60488; 64963; 51073; 29074; 122704; 56945; 54460; 10240; 54148; 55037; 84311; 7284; 29088; 64965; 28977; 11222; 64432; 10102; 64968; 128308; 6182; 85476; 64951; 51650; 64975; 65003; 51649; 79590; 28973; 64978; 54948; 51264; 124995; 51116; 6150; 123263; 65005; 65080; 65993; 51081; 92259; 29093; 65008; 84340; 92399; 51373; 28957; 64949; 64960; 9553; 6…	95	94			Human Complement System	4.95079e-36	5.18595e-34	Wikipathways	WP2806	CRP; CD55; VSIG4; C8A; SERPING1; F13A1; APOA1; MBL2; DCN; ITGA2B; PTX3; C9; C3; C2; FGG; C7; FGA; C5; FCN2; CFHR4; F10; CFH; CFI; CFB; MASP1; MASP2; C6; PLG; FGB; C4BPA; C1S; CPN1	2244; 2159; 2243; 718; 717; 716; 710; 3674; 1401; 2266; 10877; 2162; 335; 629; 1634; 731; 730; 735; 10747; 3075; 5340; 727; 722; 729; 1604; 5648; 11326; 2220; 5806; 4153; 3426; 1369	92	92
Mitochondrial translation elongation	4.34591e-34	1.93741e-31	Reactome	R-HSA-5389840	MRPL24; MRPL27; MRPL20; MRPL23; TSFM; MRPL28; PTCD3; MRPS17; MRPS16; MRPS15; MRPS11; MRPL33; MRPL16; MRPS35; MRPS34; MRPS36; MRPS31; MRPS33; MRPL55; MRPS7; MRPL40; MRPL50; MRPL52; MRPL38; MRPL10; MRPL11; MRPL12; MRPL14; MRPL15; MRPS9; MRPL18; MRPS6; MRPS5; MRPS2; MRPS18B; MRPL39; MRPL4; MRPL2; MRPL3; MRPL1; MRPL9; MRPS28; MRPS26; GFM1; MRPS24; MRPS25; MRPS22; DAP3; MRPS21; MRPL42; MRPL41; MRPS23;…	51069; 55052; 64969; 54534; 10573; 51021; 7818; 60488; 64963; 51073; 29074; 122704; 56945; 54460; 10240; 54148; 55037; 84311; 7284; 29088; 64965; 28977; 11222; 64432; 10102; 64968; 128308; 6182; 85476; 64951; 51650; 64975; 65003; 51649; 79590; 28973; 64978; 54948; 51264; 124995; 51116; 6150; 65005; 65080; 65993; 51081; 92259; 29093; 65008; 51373; 28957; 64949; 64960; 9553; 64928; 64976	89	88			Complement cascade	3.04932e-32	2.55533e-30	Reactome	R-HSA-166658	CRP; CD55; C1QC; C1QB; C8A; C8B; SERPING1; C1QA; C8G; MBL2; C4BPA; C4BPB; CPB2; C9; C3; C2; C7; C6; C5; FCN2; CFHR4; CFHR5; VTN; C1R; CLU; F2; CFH; CFI; CFB; MASP1; MASP2; C1S; CPN2; CPN1	629; 722; 732; 735; 81494; 2220; 716; 715; 714; 1401; 718; 731; 5648; 3426; 1370; 717; 7448; 4153; 1604; 1369; 10877; 727; 3075; 713; 730; 729; 2147; 710; 733; 10747; 1191; 1361; 712; 725	141	140
Mitochondrial translation termination	6.76746e-33	2.51411e-30	Reactome	R-HSA-5419276	MRPL24; MRPL27; MRPL20; MRPL23; MRPL22; MRPL28; PTCD3; MRPS17; MRPS16; MRPS15; MRPS11; MRPL33; MRPL16; MRPS35; MRPS34; MRPS36; MRPS31; MRPS33; MRPL55; MRPS7; MRPL40; MRPL50; MRPL52; MRPL38; MRPL10; MRPL11; MRPL12; MRPL14; MRPL15; MRPS9; MRPL18; MRPS6; MRPS5; MRPS2; MRPS18B; MRPL39; MRPL4; MRPL2; MRPL3; MRPL1; MRPL9; MRRF; MRPS28; MRPS26; MRPS24; MRPS25; MRPS22; DAP3; MRPS21; MRPL42; MRPL41; MRPS2…	51069; 55052; 64969; 54534; 10573; 51021; 7818; 60488; 64963; 51073; 29074; 122704; 56945; 54460; 10240; 54148; 55037; 84311; 29088; 64965; 28977; 11222; 64432; 64968; 128308; 6182; 64951; 51650; 64975; 65003; 51649; 79590; 28973; 64978; 54948; 51264; 124995; 51116; 6150; 65005; 65080; 65993; 51081; 92259; 29093; 65008; 84340; 92399; 51373; 28957; 64949; 64960; 9553; 64928; 64976	89	88			Extracellular matrix organization	4.4754e-32	3.12532e-30	Reactome	R-HSA-1474244	TGFB2; LUM; TIMP1; VCAN; ITGA11; FBLN2; LOX; COL3A1; FBLN1; COL2A1; HTRA1; FBLN5; DCN; LOXL2; ITGA2B; CTSG; TNXB; SERPINE1; CEACAM1; FMOD; PCOLCE; FGG; FGA; FGB; COL8A1; LTBP4; LTBP3; LTBP2; LTBP1; EFEMP1; CD44; EFEMP2; VTN; COL5A1; TNC; FBN1; FN1; SDC2; COL14A1; PLG; COL1A2; ITGAM; MMP9; MMP2	7148; 10516; 1634; 7076; 2192; 7042; 2244; 2199; 3684; 1278; 2202; 4060; 5054; 4054; 1295; 7448; 7373; 5654; 4053; 1281; 2335; 4318; 22801; 3371; 30008; 8425; 2266; 4017; 2200; 2243; 634; 2331; 4313; 5118; 4052; 1280; 5340; 1462; 6383; 960; 3674; 1511; 4015; 1289	294	294
Valine, leucine and isoleucine degradation - Homo sapiens (human)	2.27609e-32	7.24773e-30	KEGG	path:hsa00280	AOX1; HSD17B10; ACADS; MUT; PCCB; PCCA; AGXT2; ABAT; HIBADH; ACADM; ACAA2; HADHB; HADHA; ACAT1; ACAA1; BCKDHB; MCEE; HMGCS1; HMGCS2; DLD; HMGCL; AUH; ACSF3; ALDH6A1; ALDH9A1; ACADSB; ALDH7A1; ALDH1B1; EHHADH; MCCC2; MCCC1; IVD; HADH; ACAD8; ALDH2; DBT; ECHS1; OXCT1; BCKDHA; HIBCH	3712; 3158; 64902; 18; 593; 217; 27034; 5019; 30; 34; 35; 36; 549; 38; 1962; 316; 197322; 1738; 10449; 594; 26275; 3028; 84693; 3030; 64087; 3032; 3033; 56922; 219; 1629; 223; 1892; 5095; 5096; 4329; 11112; 4594; 3155; 501; 3157	48	48			Platelet degranulation	1.09448e-30	6.55127e-29	Reactome	R-HSA-114608	TGFB2; TIMP1; QSOX1; ECM1; SERPING1; AHSG; F13A1; SERPINE1; PLG; SERPINA3; SERPINA4; CLEC3B; ITGA2B; MMRN1; APOH; ITIH4; TF; FGG; FGA; FGB; IGF2; SERPINA1; SERPINF2; CLU; HRG; ORM1; F5; FN1; ISLR; KNG1; APOA1; ORM2	3481; 7076; 7018; 7042; 2162; 2244; 350; 7123; 3700; 5345; 5054; 5267; 1893; 2335; 5005; 5768; 12; 3827; 3273; 2266; 2153; 2243; 335; 710; 5340; 5265; 3671; 22915; 5004; 197; 3674; 1191	129	129
Mitochondrial translation initiation	1.00383e-31	2.79692e-29	Reactome	R-HSA-5368286	MRPL24; MRPL27; MRPL20; MRPL23; MRPL22; MRPL28; PTCD3; MRPS17; MRPS16; MRPS15; MRPS11; MRPL33; MRPL16; MRPS35; MRPS34; MRPS36; MRPS31; MRPS33; MRPL55; MRPS7; MRPL40; MRPL50; MRPL52; MRPL38; MRPL10; MRPL11; MRPL12; MRPL14; MRPL15; MRPS9; MRPL18; MRPS6; MRPS5; MRPS2; MRPS18B; MRPL39; MRPL4; MRPL2; MRPL3; MRPL1; MRPL9; MTFMT; MRPS28; MRPS26; MRPS24; MRPS25; MRPS22; DAP3; MRPS21; MRPL42; MRPL41; MRPS…	51069; 55052; 64969; 54534; 10573; 51021; 7818; 60488; 64963; 51073; 29074; 122704; 56945; 54460; 10240; 54148; 55037; 84311; 29088; 64965; 28977; 11222; 64432; 64968; 128308; 6182; 64951; 51650; 64975; 65003; 51649; 79590; 28973; 64978; 54948; 51264; 124995; 51116; 6150; 123263; 65005; 65080; 65993; 51081; 92259; 29093; 65008; 51373; 28957; 64949; 64960; 9553; 64928; 64976	89	88			Complement Activation	3.48876e-30	1.82724e-28	Wikipathways	WP545	C1R; C1S; CD55; C1QC; C9; CFB; MASP1; MASP2; C1QB; C8A; C8B; C1QA; C8G; C3; C2; C7; C6; C5	629; 5648; 731; 730; 733; 732; 735; 10747; 718; 717; 716; 715; 714; 713; 712; 1604; 727; 729	22	22
Respiratory electron transport, ATP synthesis by chemiosmotic coupling, and heat production by uncoupling proteins.	1.57737e-29	3.90661e-27	Reactome	R-HSA-163200	ETFA; NUBPL; COX5A; NDUFB9; ATP5S; UQCR11; NDUFB5; NDUFB4; NDUFB3; CYCS; NDUFA5; NDUFAF5; NDUFAF7; NDUFAF6; NDUFAF1; SCO2; NDUFB7; COX6B1; UQCRB; LRPPRC; NDUFAB1; TIMMDC1; COX5B; NDUFA12; NDUFB11; NDUFB10; NDUFA8; UQCR10; NDUFB6; NDUFA11; COX8A; NDUFA13; SURF1; UQCRH; COX6C; NDUFA6; NDUFA7; NDUFA4; ETFB; NDUFA2; NDUFA3; NDUFB1; COQ10B; NDUFV1; ETFDH; SDHA; COX4I1; ECSIT; COX6A1; COX7A2L; CYC1; ND…	4725; 7384; 4700; 4706; 4719; 80219; 4728; 2110; 10975; 4722; 27109; 29796; 2109; 1327; 1351; 51103; 4696; 4715; 4724; 51300; 51295; 1329; 54205; 55471; 2108; 9167; 9377; 4711; 6834; 126328; 51079; 137682; 10128; 54539; 7386; 374291; 4702; 6390; 4713; 1537; 7385; 55967; 4701; 4707; 6389; 4716; 9997; 7388; 4695; 1345; 4710; 4723; 79133; 4698; 1337; 4709; 4726; 7381; 80224; 4697; 1340; 4712	123	123			Response to elevated platelet cytosolic Ca2+	4.1291e-30	1.92232e-28	Reactome	R-HSA-76005	TGFB2; TIMP1; QSOX1; ECM1; SERPING1; AHSG; F13A1; SERPINE1; SERPINA1; SERPINA3; SERPINA4; CLEC3B; ITGA2B; MMRN1; APOH; APOA1; TF; FGG; FGA; FGB; IGF2; ITIH4; FN1; SERPINF2; CLU; HRG; ORM1; F5; ORM2; ISLR; KNG1; PLG	3481; 7076; 7018; 7042; 2162; 2244; 350; 7123; 3700; 5345; 5054; 5267; 1893; 5005; 5768; 12; 3827; 3273; 2266; 2153; 2243; 335; 710; 5340; 5265; 3671; 22915; 5004; 197; 2335; 3674; 1191	134	134
Amino Acid metabolism	2.75658e-25	6.14442e-23	Wikipathways	WP3925	CS; MUT; GSS; PCK1; SMS; FAH; FH; GSR; MDH2; MDH1; HIBADH; LARS2; ASS1; ALDH1A1; PDHX; OGDH; GLS; BHMT; CTH; ACAA1; MARS2; ACADM; PC; MPST; FTCD; GOT2; GOT1; HNMT; HMGCS2; PDHA1; DLD; HMGCL; AUH; ACSS1; SUCLG1; ALDH7A1; DDC; ACO2; EHHADH; MCCC1; HADH; ADH5; DLST; GLUD1; MAOA; OAT; PDK4; SDHA; HIBCH	216; 11112; 26275; 549; 84532; 1491; 128; 56922; 50; 3033; 6389; 4128; 5091; 8802; 4967; 5105; 2936; 2937; 445; 4191; 4190; 3155; 4357; 92935; 1644; 2271; 1431; 30; 34; 8050; 2806; 2805; 1738; 3158; 4942; 23395; 501; 635; 6611; 2184; 3176; 10841; 1743; 1962; 2744; 4594; 2746; 5160; 5166	91	91			Regulation of Insulin-like Growth Factor (IGF) transport and uptake by Insulin-like Growth Factor Binding Proteins (IGFBPs)	1.27523e-29	5.34321e-28	Reactome	R-HSA-381426	TIMP1; QSOX1; VCAN; AHSG; ITIH2; APOA1; APOA2; SERPINA1; APOE; CTSG; FSTL1; C3; FGG; FGA; APOL1; IGF2; LTBP1; FBN1; IGFBP3; TF; TNC; MXRA8; CP; F2; F5; FN1; SDC2; KNG1; IGFALS; PLG; MMP2	7076; 7018; 3698; 8542; 336; 11167; 4313; 718; 3371; 1356; 3483; 2335; 54587; 3486; 348; 5768; 3827; 2266; 2200; 2153; 2243; 4052; 2147; 335; 5265; 1511; 5340; 1462; 6383; 3481; 197	127	126
Metabolism of amino acids and derivatives	6.92332e-25	1.40292e-22	Reactome	R-HSA-71291	GRHPR; GSR; AUH; CKB; AGXT2; DHTKD1; OAT; DMGDH; HIBADH; ASS1; SLC25A10; NDUFAB1; OGDH; PRODH2; MPST; GOT2; ASRGL1; SCLY; GPT; NQO1; SHMT1; HOGA1; PSPH; HNMT; UBA52; MTRR; DBT; HSD17B10; BBOX1; RPL3; TST; PDHX; GLDC; NMRAL1; GATM; MRI1; PDHB; AMT; DLD; DLAT; DDO; DDC; CHDH; MCCC2; MCCC1; BHMT; IVD; SDSL; ACAD8; PRODH; SARDH; EEF1E1; GCSH; GAMT; SMS; GLS; CTH; HGD; ADI1; ASPG; ASPA; ACAT1; AFMID; …	3712; 4706; 26275; 29958; 275; 2639; 443; 6821; 7263; 1728; 2628; 2744; 2875; 1629; 8424; 27034; 2593; 36; 56922; 64902; 5860; 51540; 4942; 2746; 55217; 80150; 501; 6611; 594; 4552; 38; 5092; 125061; 1757; 3081; 11224; 6520; 5160; 55349; 7311; 1644; 64087; 144193; 130013; 5625; 1152; 113675; 8528; 5162; 84245; 10157; 635; 9061; 593; 445; 4329; 6228; 6154; 6470; 23743; 1738; 2184; 5723; 55526; 293…	342	339			classical complement pathway	1.4672e-26	5.5887e-25	BioCarta	classicpathway	C8A; C8G; C1QC; C8B; C1QA; C1QB; C1S; C9; C1R; C3; C2; C7; C6; C5	718; 730; 716; 731; 717; 729; 735; 714; 732; 715; 733; 712; 727; 713	14	14
Electron Transport Chain (OXPHOS system in mitochondria)	4.27761e-23	7.94566e-21	Wikipathways	WP111	COX5A; COX5B; UQCR10; UQCR11; NDUFB5; NDUFB4; NDUFB3; NDUFB1; UQCRH; COX6B1; UQCRB; NDUFAB1; NDUFV1; NDUFB9; NDUFA12; NDUFB7; NDUFB10; ATP5S; COX8A; NDUFB6; SURF1; COX6C; NDUFA6; NDUFA7; NDUFA4; NDUFA5; NDUFA2; NDUFA3; UQCRC1; SLC25A6; SLC25A5; SLC25A4; NDUFS8; COX4I1; NDUFA8; COX7A2; COX6A1; COX7A2L; NDUFS1; NDUFS3; NDUFS4; NDUFS5; NDUFS6; NDUFS7; SDHA; UQCRFS1; SDHB; UQCRC2; COX15; COX17	10063; 7388; 7381; 7386; 7384; 7385; 4707; 4706; 4702; 4701; 4700; 4709; 9377; 6390; 292; 293; 291; 1327; 1329; 6389; 9167; 10975; 4725; 4724; 4726; 4723; 4722; 1337; 6834; 1340; 1345; 1347; 1351; 1355; 374291; 29796; 4695; 4697; 4696; 27109; 55967; 4728; 4715; 4716; 4710; 4711; 4712; 4713; 4719; 4698	103	103			Regulation of Complement cascade	1.62841e-26	5.68587e-25	Reactome	R-HSA-977606	CD55; CFB; CPB2; C8A; C8B; SERPING1; C8G; C4BPA; C4BPB; C9; C3; C2; C7; C6; C5; CFHR4; CFHR5; VTN; C1R; CLU; F2; CFH; CFI; C1QC; C1QB; C1QA; C1S; CPN2; CPN1	629; 722; 732; 735; 81494; 716; 715; 714; 718; 731; 3426; 1370; 717; 7448; 1191; 1604; 1369; 10877; 727; 3075; 713; 730; 729; 2147; 710; 733; 1361; 712; 725	130	129
Valine, leucine and isoleucine degradation	4.76937e-23	8.17763e-21	EHMN	Valine, leucine and isoleucine degradation	HSD17B10; ACADS; PCCB; PCCA; ABAT; HIBADH; LARS2; ACADL; ACADM; IARS2; VARS2; HADHB; HADHA; ACAA2; DBI; DLD; HMGCL; AUH; ALDH6A1; ALDH9A1; ACADSB; ALDH7A1; ALDH1B1; EHHADH; MCCC2; MCCC1; IVD; HADH; SLC3A2; ALDH2; ECHS1; BCKDHB; BCKDHA; HIBCH	3028; 23395; 501; 3712; 1738; 26275; 3032; 5095; 3155; 549; 10449; 217; 64087; 219; 33; 6520; 594; 36; 1622; 223; 35; 56922; 57176; 55699; 593; 3030; 34; 4329; 11112; 18; 3033; 1892; 1962; 5096	49	49			Innate Immune System	3.711e-25	1.19608e-23	Reactome	R-HSA-168249	FGA; CRP; CFB; EPX; CD55; SLC2A3; HP; QSOX1; SAA1; CPB2; C1QA; C8A; C8B; SERPING1; AHSG; C8G; MBL2; OLFM4; LBP; SERPINA3; CD209; C4BPA; C4BPB; PTX3; CEACAM1; DOK3; C9; C3; C2; FGG; C7; C6; FGB; FCN2; RNASE3; CFHR4; CFHR5; CD44; SERPINA1; VNN1; CTSG; LTF; C1R; CLU; VTN; FTL; SLPI; IRAK4; F2; ORM1; CFH; PGLYRP2; MPO; CFI; C1QC; C1QB; MASP2; MASP1; C5; ITGAM; MMP9; C1S; CPN2; CPN1; ORM2; WASL	6590; 735; 2244; 3684; 717; 4153; 4353; 3929; 714; 10877; 3075; 12; 6288; 10747; 81494; 634; 729; 2147; 1511; 5004; 8876; 960; 1401; 731; 7448; 4318; 5768; 713; 710; 732; 730; 197; 1191; 1361; 725; 51135; 6037; 6515; 5648; 3240; 1370; 1604; 8288; 5005; 727; 2266; 716; 114770; 5806; 715; 8976; 2512; 629; 4057; 2220; 718; 79930; 1369; 733; 3426; 2243; 10562; 722; 5265; 30835; 712	1077	1065
Oxidative phosphorylation - Homo sapiens (human)	9.5652e-23	1.52292e-20	KEGG	path:hsa00190	ATP6V1D; ATP6V1A; COX5A; NDUFB9; UQCR10; CYC1; NDUFB5; NDUFB4; NDUFB3; ATP6V1H; NDUFB1; UQCRH; ATP6V0A2; COX6B1; UQCRB; NDUFAB1; NDUFV1; COX5B; LHPP; NDUFB11; NDUFB10; NDUFB7; NDUFA11; NDUFA12; NDUFB6; ATP6V1B2; COX6C; NDUFS5; NDUFA6; NDUFA7; NDUFA4; NDUFA5; NDUFA2; NDUFA3; NDUFA13; COX8A; NDUFA8; SDHA; COX4I1; COX7A2; COX6A1; COX7A2L; COX17; ATP6V1E1; UQCR11; NDUFS1; NDUFS3; NDUFS4; ATP6V0A1; ND…	1537; 523; 526; 529; 374291; 535; 64077; 4707; 4695; 4696; 4697; 4698; 4700; 4701; 4702; 4706; 29796; 4709; 4710; 4711; 4712; 4713; 4715; 4716; 4719; 4722; 4723; 4724; 4725; 4726; 4728; 55967; 9377; 51382; 7381; 7384; 7385; 7386; 7388; 10975; 6389; 6390; 54539; 1327; 1329; 1337; 1340; 1345; 1347; 1351; 1355; 10063; 126328; 51079; 51606; 9167; 23545	133	133			Post-translational protein phosphorylation	3.41418e-23	1.02182e-21	Reactome	R-HSA-8957275	TIMP1; QSOX1; VCAN; AHSG; ITIH2; APOA1; APOA2; SERPINA1; APOE; FSTL1; C3; FGG; FGA; APOL1; LTBP1; FBN1; IGFBP3; TF; TNC; MXRA8; CP; F5; FN1; SDC2; KNG1	7076; 7018; 3698; 8542; 336; 11167; 718; 3371; 1356; 2335; 54587; 3486; 348; 5768; 3827; 2266; 2200; 2153; 2243; 4052; 335; 5265; 1462; 6383; 197	110	109
Valine Leucine Isoleucine degradation	1.68537e-22	2.50447e-20	INOH	None	HSD17B10; ACADS; PCCB; PCCA; HIBADH; ACADM; HADHB; HADHA; ALDH1A1; ACAA2; ACAA1; HMGCS1; HMGCS2; HMGCL; AUH; ALDH6A1; ALDH9A1; ALDH7A1; ALDH1B1; EHHADH; MCCC2; MCCC1; IVD; HADH; ALDH2; ECHS1; OXCT1	3028; 501; 3712; 216; 5095; 3155; 30; 549; 3033; 64087; 219; 223; 3158; 35; 56922; 3032; 10449; 3030; 34; 4329; 3157; 11112; 217; 1892; 1962; 5019; 5096	32	32			lectin induced complement pathway	7.67267e-23	2.14323e-21	BioCarta	lectinpathway	MASP1; MASP2; C8A; C9; C8B; C8G; C3; C2; C7; C6; C5; MBL2	718; 730; 731; 717; 4153; 729; 5648; 735; 10747; 732; 733; 727	12	12
Pyruvate metabolism and Citric Acid (TCA) cycle	3.6884e-22	5.1384e-20	Reactome	R-HSA-71406	MPC2; MPC1; ADHFE1; ME3; FH; IDH3A; OGDH; IDH3B; IDH3G; FAHD1; PDPR; GLO1; PDHB; NNT; DLAT; LDHB; PDHX; PDHA1; DLD; IDH2; SUCLG2; PDP1; SUCLG1; CS; ACO2; L2HGDH; DLST; SUCLA2; D2HGDH; GSTZ1; PDK2; PDK4; SDHA; SDHB; MDH2	5166; 6389; 1738; 55066; 8803; 50; 10873; 3420; 4191; 8802; 1743; 3419; 728294; 137872; 2271; 23530; 5160; 1737; 5162; 3418; 8801; 5164; 8050; 4967; 54704; 2954; 6390; 79944; 1431; 3945; 51660; 25874; 2739; 3421; 81889	54	54			Platelet activation, signaling and aggregation	9.78988e-22	2.56372e-20	Reactome	R-HSA-76002	TGFB2; TIMP1; QSOX1; ECM1; SERPING1; AHSG; F13A1; SERPINE1; SERPINA1; SERPINA3; SERPINA4; CLEC3B; ITGA2B; MMRN1; APOH; ITIH4; TF; FGG; FGA; FGB; IGF2; SERPINF2; CLU; HRG; F5; F2; ORM1; FN1; ORM2; APOA1; ISLR; KNG1; PLG	3481; 7076; 7018; 7042; 5005; 2162; 2244; 350; 22915; 7123; 3700; 5054; 5267; 1893; 12; 2335; 5768; 3827; 2266; 2153; 2243; 3273; 2147; 5340; 710; 5265; 3671; 5004; 197; 3674; 5345; 1191; 335	260	260
Fatty acid metabolism	1.39253e-21	1.82585e-19	Reactome	R-HSA-8978868	MORC2; MUT; PECR; ACADS; PCCB; PRKAG2; PRKAA2; FAM213B; CPT2; ACAD10; ACADL; ACADM; CHKB; AKR1C3; NDUFAB1; ELOVL7; ACADVL; ECHS1; HADHB; ACOT2; ACSM3; HADHA; CBR1; HSD17B8; ACAA2; ACAA1; FASN; ABCD1; ACOT11; MCEE; ACOT13; ACBD6; CPT1A; CRAT; PCCA; ACSL1; ACSF2; ACSF3; PTGR1; PTGR2; THEM4; ACOT8; MCAT; ACOT1; EPHX2; NUDT19; EHHADH; DECR1; PHYH; DBI; HADH; FAAH; SLC27A2; ACOX2; PTGES2; ACOX1; GSTM4…	80724; 8309; 1120; 22880; 55825; 4706; 641371; 5264; 1622; 3032; 1374; 55856; 10449; 26027; 873; 166785; 3033; 80221; 5096; 35; 5563; 2948; 30; 2879; 51179; 10005; 215; 127281; 3030; 4594; 51422; 27349; 1632; 51; 1962; 1384; 2053; 26063; 11001; 390916; 37; 197322; 10455; 7923; 1666; 6296; 8644; 10965; 84320; 34; 80142; 2194; 1892; 33; 5095; 79993; 2180; 22949; 145482; 117145; 2678; 57834; 2166; 8…	189	185			Staphylococcus aureus infection - Homo sapiens (human)	4.50482e-20	1.11031e-18	KEGG	path:hsa05150	CFH; CFI; C1QC; MASP2; FCGR2B; C1QB; C1QA; MASP1; PLG; C3; ITGAM; C2; C1S; C1R; FGG; CFB; C5; MBL2	3075; 5648; 2213; 4153; 712; 713; 714; 715; 716; 717; 718; 727; 2266; 5340; 3426; 3684; 629; 10747	56	55
Metabolism of lipids	6.99039e-21	8.65643e-19	Reactome	R-HSA-556833	PECR; FAM213B; TM7SF2; PCCB; SLC22A5; ACADVL; PI4K2B; FDXR; NDUFAB1; EHHADH; ACSM3; CPT2; SPTLC3; MTMR9; CYP51A1; ABCD1; MTMR2; PIP4K2C; PIK3R2; DBI; HADHA; SUMO2; HMGCL; MTM1; PCYT2; PTGR1; PTGR2; ACOT8; GK; ACOT1; PCYT1A; GBA3; PLD1; INPP5F; PTPN13; PTGES2; ACSL1; PLEKHA5; PLEKHA6; MMAA; STARD7; STARD10; ACADS; NSDHL; PGS1; OSBPL10; ACADL; ACADM; CHKB; THEM4; ECHS1; FIG4; LSS; PNPLA4; OXCT1; GB…	2531; 1595; 3155; 4706; 114884; 23761; 5783; 80221; 5096; 64900; 30; 23171; 2053; 622; 22874; 5130; 10809; 1120; 2710; 26063; 5298; 390916; 197322; 51179; 56910; 1666; 6609; 1622; 2194; 1645; 79993; 8228; 2166; 7368; 284161; 8647; 84869; 50640; 10087; 56894; 3158; 375; 79611; 1374; 3157; 427; 873; 9489; 10005; 23259; 10455; 56261; 127281; 66036; 2171; 54477; 4594; 1632; 38; 8898; 50814; 56898; 84…	664	659			Immune System	2.33183e-17	5.42798e-16	Reactome	R-HSA-168256	FGA; C1QC; CRP; PTX3; EPX; CD55; AHSG; CFB; HP; IL1RAP; IL5RA; SAA1; C1QB; PGLYRP2; C8B; SERPING1; C1QA; C8G; MBL2; OLFM4; LBP; SERPINA3; C4BPA; C4BPB; CFHR5; CEACAM1; DOK3; C9; C3; C2; FGG; C7; C6; FGB; ITGAM; FCN2; RNASE3; QSOX1; CFHR4; SERPINA1; CD44; VNN1; FCGR2B; EIF4E3; VTN; LGALS9; LTF; CPN2; CLU; CTSG; ANAPC5; FTL; ORM1; SLPI; SQSTM1; F2; ORM2; CFH; CD209; MPO; IRAK4; CFI; SLC2A3; CPB2; M…	114770; 3929; 10747; 2147; 3965; 731; 7448; 710; 1361; 6515; 3240; 51433; 5005; 732; 730; 30835; 712; 6288; 2244; 3075; 634; 1511; 5004; 960; 733; 6590; 4318; 715; 725; 722; 1370; 3556; 2512; 629; 79930; 10562; 5265; 735; 8876; 717; 4353; 714; 10877; 12; 4057; 1401; 5768; 713; 1191; 6037; 81494; 6614; 8288; 727; 716; 3568; 8976; 3426; 3684; 4153; 729; 8878; 197; 51135; 317649; 5648; 1604; 5806; 2…	1840	1827
Citrate cycle (TCA cycle) - Homo sapiens (human)	1.18494e-20	1.39013e-18	KEGG	path:hsa00020	PCK2; PCK1; CS; MDH2; MDH1; FH; IDH3A; OGDH; IDH3B; IDH3G; PC; PDHB; OGDHL; PDHA1; DLD; IDH2; SUCLG2; SUCLG1; ACO1; ACO2; DLST; SUCLA2; DLAT; SDHA; SDHB	1431; 5160; 5162; 48; 50; 1737; 4191; 55753; 1738; 1743; 5091; 3418; 3419; 3420; 3421; 4190; 2271; 8801; 8802; 8803; 4967; 5105; 5106; 6389; 6390	30	30			Dengue-2 Interactions with Blood Clotting Cascade	4.36181e-17	9.61895e-16	Wikipathways	WP3897	F2; F11; F5; F7; F13B; FGA; PLG; SERPINF2; F10; FGG; SERPINE1; FGB	5054; 2155; 2153; 2244; 2266; 2159; 2243; 5345; 5340; 2147; 2165; 2160	22	22
Complex I biogenesis	1.38235e-20	1.54063e-18	Reactome	R-HSA-6799198	NDUFB9; NDUFB7; NDUFB6; NDUFB5; NDUFB4; NDUFB3; NDUFB1; NDUFAF5; NDUFAF7; NDUFAF6; NDUFAF1; NDUFAB1; NDUFV1; NDUFB11; NDUFB10; NDUFA11; NDUFA12; NDUFA13; NUBPL; NDUFA6; NDUFA7; NDUFA5; NDUFA2; NDUFA3; TIMMDC1; NDUFA8; ECSIT; NDUFS1; NDUFS3; NDUFS4; NDUFS5; NDUFS6; NDUFS7; NDUFS8	4707; 4725; 4716; 4696; 4711; 4700; 4715; 4695; 4706; 4724; 4719; 126328; 4710; 4728; 51079; 137682; 4723; 51295; 54539; 79133; 51103; 4698; 4722; 374291; 4702; 4709; 4726; 4713; 80224; 55471; 51300; 55967; 4701; 4712	55	55			Blood Clotting Cascade	9.00343e-17	1.88622e-15	Wikipathways	WP272	F2; F11; F5; F7; F13B; FGA; PLG; SERPINF2; F10; FGG; SERPINE1; FGB	5054; 2155; 2153; 2244; 2266; 2159; 2243; 5345; 5340; 2147; 2165; 2160	23	23
Mitochondrial Fatty Acid Beta-Oxidation	2.38486e-20	2.53136e-18	Reactome	R-HSA-77289	MUT; ACADVL; PCCB; PCCA; ACADS; ACAD10; ACADL; ACADM; NDUFAB1; THEM4; HADHB; ACSM3; HADHA; ACAA2; ACOT11; MCEE; ACOT13; ACSF2; MCAT; ACOT2; ACOT1; DBI; HADH; ECHS1; ECI1; ACBD6; MMAA; DECR1	80724; 3032; 5095; 37; 33; 4706; 641371; 117145; 1622; 1666; 84693; 35; 84320; 6296; 4594; 10965; 55856; 10449; 26027; 3030; 34; 27349; 1632; 166785; 3033; 1892; 80221; 5096	39	38			Hemostasis	6.06838e-16	1.21079e-14	Reactome	R-HSA-109582	TGFB2; TIMP1; QSOX1; ISLR; ECM1; SERPING1; AHSG; F13A1; SERPINE1; SERPINA1; SERPINA3; SERPINA4; CLEC3B; ITGA2B; MMRN1; APOH; APOA1; CEACAM1; TF; FGG; FGA; FGB; IGF2; SLC7A5; ITIH4; F13B; CD44; SERPINF2; CLU; F10; F11; F5; F2; HRG; ORM1; FN1; F7; SDC2; KNG1; PLG; ITGAM; ORM2	7018; 2244; 3684; 5267; 1893; 2335; 12; 634; 2147; 5004; 960; 3674; 2159; 7076; 7042; 2160; 5768; 2153; 710; 6383; 197; 1191; 2165; 5054; 2162; 22915; 7123; 2155; 5005; 335; 3273; 2266; 5340; 5345; 350; 8140; 3700; 3827; 2243; 5265; 3671; 3481	668	667
Non-alcoholic fatty liver disease (NAFLD) - Homo sapiens (human)	4.09033e-19	4.14425e-17	KEGG	path:hsa04932	COX5A; NDUFB9; NDUFB7; NDUFB6; NDUFB5; NDUFB4; NDUFB3; TRAF2; NDUFB1; UQCRH; COX6B1; UQCRB; NDUFAB1; PKLR; NDUFV1; COX5B; PIK3CA; NDUFB11; NDUFB10; UQCR10; PRKAG1; PIK3R2; NDUFA12; UQCR11; MAPK8; COX6C; NDUFA11; NDUFA6; NDUFA7; NDUFA4; NDUFA5; NDUFA2; NDUFA3; NDUFA13; NDUFA8; PRKAA2; PRKAG2; SDHA; COX4I1; CYCS; COX7A2; COX6A1; COX7A2L; COX8A; CYC1; NDUFS1; NDUFS3; NDUFS4; NDUFS5; NDUFS6; NDUFS7; …	1537; 7186; 374291; 4695; 4696; 4697; 4698; 4700; 4701; 4702; 4706; 4707; 4709; 4710; 4711; 4712; 4713; 4715; 4716; 4722; 4723; 4724; 4725; 4726; 4728; 4719; 55967; 5290; 5296; 5313; 7381; 7384; 7385; 7386; 7388; 51422; 10975; 6389; 6390; 54539; 1327; 1329; 1337; 5599; 1340; 1345; 1347; 29796; 126328; 51079; 1351; 5563; 54205; 5571; 9377; 9167	149	149			Terminal pathway of complement	1.9656e-15	3.74357e-14	Reactome	R-HSA-166665	C8B; C8A; C9; C8G; CLU; C7; C6; C5	730; 731; 1191; 729; 735; 732; 733; 727	8	8
Thermogenesis - Homo sapiens (human)	4.66519e-19	4.52118e-17	KEGG	path:hsa04714	CPT1A; COX5A; NDUFB9; NDUFB7; NDUFB6; NDUFB5; NDUFB4; NDUFB3; PRKAA2; NDUFB1; NDUFAF5; NDUFAF7; NDUFAF6; NDUFA13; UQCRH; COX6B1; UQCRB; TSC1; NDUFAB1; NDUFV1; COX5B; TSC2; CPT2; NDUFB11; NDUFB10; UQCR10; PRKAG1; NDUFA11; NDUFA12; UQCR11; HRAS; COX6C; NDUFA6; NDUFA7; NDUFA4; NDUFA5; NDUFA2; NDUFA3; ADCY5; COA4; COX8A; NDUFA8; PRKAG2; SDHA; COX4I1; COA3; SMARCD1; COX7A2; MLST8; COX6A1; COX7A2L; RPS…	1537; 9377; 51287; 374291; 55471; 4701; 6195; 7248; 4707; 4695; 4696; 4697; 4698; 4700; 4702; 4706; 4723; 4709; 4710; 4711; 4712; 111; 112; 115; 4724; 4725; 4726; 4713; 4728; 4715; 2180; 4716; 57492; 55967; 4722; 79133; 3265; 7381; 7384; 7385; 51422; 64223; 6389; 6390; 54539; 28958; 7388; 1327; 1329; 1340; 1345; 1347; 1351; 1355; 10063; 1337; 1374; 1376; 29796; 126328; 10975; 51079; 4719; 51103; …	229	229			Binding and Uptake of Ligands by Scavenger Receptors	1.30673e-14	2.38053e-13	Reactome	R-HSA-2173782	APOE; HP; SSC5D; CD163; MASP1; SAA1; FTL; HPX; COL1A2; COL3A1; APOA1; APOL1; MSR1	335; 348; 9332; 1278; 5648; 6288; 3240; 8542; 4481; 1281; 2512; 284297; 3263	41	41
Nonalcoholic fatty liver disease	3.45946e-18	3.21298e-16	Wikipathways	WP4396	TRAF2; COX5A; COX5B; PRKAG1; UQCR11; NDUFB5; PRKAG2; NDUFB3; PRKAA2; CYCS; UQCRH; COX6B1; UQCRB; NDUFAB1; PKLR; NDUFV1; NDUFB9; PIK3CA; NDUFA12; NDUFB7; NDUFB11; NDUFB10; UQCR10; NDUFB6; NDUFA11; COX8A; NDUFA13; MAPK8; COX6C; PIK3R2; NDUFA6; NDUFA7; NDUFA4; NDUFA5; NDUFA2; NDUFA3; NDUFA8; SDHA; COX4I1; NDUFB1; COX7A2; COX6A1; COX7A2L; CYC1; NDUFB4; NDUFS1; NDUFS3; NDUFS4; NDUFS5; NDUFS6; NDUFS7; …	5313; 7388; 7381; 7386; 7384; 7385; 4707; 4706; 4702; 4701; 4700; 4709; 54205; 9377; 6390; 5599; 51079; 1327; 1329; 6389; 9167; 4728; 4726; 4723; 4722; 1337; 5571; 51422; 1537; 54539; 126328; 1340; 1345; 1347; 5563; 1351; 374291; 29796; 5296; 5290; 4695; 4697; 4696; 4698; 55967; 10975; 4715; 4716; 4710; 4711; 4712; 4713; 4719; 4725; 4724; 7186	155	155			Beta1 integrin cell surface interactions	2.80044e-14	4.88911e-13	PID	integrin1_pathway	FN1; FBN1; THBS2; VTN; ITGA11; COL1A2; TNC; F13A1; COL3A1; TGFBI; COL5A1; FGG; COL2A1; FGA; FGB	1280; 3371; 7448; 22801; 7045; 1278; 2266; 2200; 2162; 2244; 2243; 1281; 7058; 2335; 1289	66	66
Parkinson disease - Homo sapiens (human)	5.27703e-18	4.705e-16	KEGG	path:hsa05012	COX5A; NDUFB9; NDUFB7; NDUFB6; NDUFB5; NDUFB4; NDUFB3; NDUFB1; UQCRH; COX6B1; UQCRB; NDUFAB1; NDUFV1; COX5B; NDUFA12; NDUFB11; NDUFB10; UQCR10; UBE2G2; COX8A; UQCR11; COX6C; NDUFA11; NDUFA6; NDUFA7; NDUFA4; NDUFA5; NDUFA2; NDUFA3; NDUFA13; SLC25A5; SLC25A6; NDUFA8; SLC25A4; SDHA; COX4I1; CYCS; COX7A2; COX6A1; COX7A2L; ADCY5; CYC1; NDUFS1; NDUFS3; NDUFS4; NDUFS5; NDUFS6; NDUFS7; NDUFS8; UQCRFS1; S…	1537; 374291; 4695; 4696; 4697; 4698; 4700; 4701; 4702; 4706; 4707; 4709; 4710; 4711; 4712; 4713; 4715; 4716; 4719; 4722; 4723; 4724; 4725; 4726; 4728; 111; 7327; 9377; 54205; 7384; 7385; 7386; 9167; 7388; 10975; 6389; 6390; 7381; 54539; 291; 292; 1327; 1329; 1337; 1340; 1345; 1347; 1351; 29796; 126328; 55967; 51079; 293	142	142			Elastic fibre formation	7.04978e-14	1.18154e-12	Reactome	R-HSA-1566948	TGFB2; LTBP4; LTBP3; LTBP2; LTBP1; EFEMP1; EFEMP2; FBN1; FBLN2; FBLN1; VTN; FBLN5	4052; 2202; 2192; 4054; 7042; 10516; 2200; 7448; 2199; 8425; 4053; 30008	36	36
TCA cycle	1.37009e-17	1.17459e-15	EHMN	TCA cycle	PCK2; PCK1; CLYBL; CS; MDH2; MDH1; FH; SLC25A11; IDH3A; OGDH; IDH3B; IDH3G; OGDHL; DLD; IDH2; SUCLG2; SUCLG1; ACO1; ACO2; DLST; SUCLA2; SDHA; SDHB	8803; 6389; 1743; 171425; 4967; 50; 1738; 3420; 8802; 3419; 8402; 2271; 55753; 3418; 8801; 5106; 4190; 6390; 1431; 4191; 5105; 48; 3421	30	30			alternative complement pathway	8.62378e-14	1.38976e-12	BioCarta	alternativepathway	C8B; C8A; C9; C8G; C3; C7; C6; C5	718; 730; 731; 729; 735; 732; 733; 727	10	10
Translation	2.87379e-17	2.37247e-15	Reactome	R-HSA-72766	SARS2; MRPL24; MRPL27; RPL35; MRPL20; MRPL23; PARS2; MRPL1; EIF2B3; MRPS23; MRPS17; MRPS16; MRPS15; DARS2; RARS2; MRPS11; TRIM24; LARS2; RPS23; IARS2; RPL3; MRPL16; MRPL55; MRPS35; MRPS34; RPL26; MRPS31; UBA52; MRPS33; MRPL28; N6AMT1; MRPS7; MRPL40; MRPL50; MRPL52; VARS2; GFM2; AARS2; MRPL38; MRPL10; GSPT2; MRPL12; MRPL14; MRPL15; MRPS9; MRPL18; MRPS6; MRPS5; SRP14; MRPS2; MRPS18B; MRPL39; MRPL4;…	55157; 55052; 60488; 64969; 54534; 51021; 7818; 64963; 29104; 51073; 122704; 56945; 54460; 23395; 10240; 25973; 54148; 29074; 55037; 84311; 7284; 57038; 51069; 29088; 64965; 9521; 11222; 51121; 64432; 23708; 10102; 64968; 128308; 6182; 85476; 6235; 64951; 51650; 6228; 64975; 57505; 11224; 65003; 57176; 54938; 51649; 79590; 28973; 64978; 54948; 6154; 124995; 51116; 6150; 28977; 123263; 9553; 65005…	310	307			Formation of Fibrin Clot (Clotting Cascade)	2.11918e-13	3.28865e-12	Reactome	R-HSA-140877	F2; FGG; F5; F7; F13B; KNG1; SERPING1; F13A1; F10; F11; FGA; FGB	2147; 710; 2165; 2160; 2155; 2159; 2244; 3827; 2266; 2162; 2153; 2243	39	39
Citric acid cycle (TCA cycle)	1.51334e-16	1.14551e-14	Reactome	R-HSA-71403	IDH3A; NNT; OGDH; IDH3B; IDH3G; DLD; DLST; SUCLA2; SDHB; SUCLG2; FAHD1; CS; SUCLG1; MDH2; ME3; IDH2; SDHA; ACO2; FH	8803; 6389; 1743; 4967; 50; 10873; 1738; 3420; 8802; 3419; 81889; 2271; 23530; 4191; 3418; 8801; 6390; 1431; 3421	22	22			Molecules associated with elastic fibres	3.60286e-13	5.39142e-12	Reactome	R-HSA-2129379	TGFB2; LTBP4; LTBP3; LTBP2; LTBP1; EFEMP1; EFEMP2; VTN; FBLN2; FBLN1; FBLN5	4052; 2202; 2192; 4054; 7042; 10516; 7448; 2199; 8425; 4053; 30008	31	31
Glyoxylate metabolism and glycine degradation	1.54173e-16	1.14551e-14	Reactome	R-HSA-389661	GRHPR; AGXT2; DHTKD1; NDUFAB1; OGDH; GLDC; PRODH2; GOT2; PDHB; AMT; PDHX; PDHA1; DLD; DLAT; DDO; PXMP2; HOGA1; ALDH4A1; DLST; BCKDHB; BCKDHA; DBT; GCSH	1738; 4967; 8659; 4706; 1743; 55526; 594; 9380; 112817; 5160; 1737; 64902; 8050; 275; 593; 2731; 2806; 5827; 58510; 1629; 8528; 5162; 2653	32	32			Integrin	3.2525e-12	4.6993e-11	INOH	None	DCN; COL8A1; ELN; FN1; VCAN; SDC2; TNXB; ITGA2B; ITGA11; COL1A2; ITGAM; TNC; CD44; COL3A1; COL5A1; COL2A1; LUM	7148; 1634; 3684; 1278; 22801; 4060; 2006; 1295; 3371; 2335; 1281; 1280; 1462; 6383; 960; 3674; 1289	124	124
Citrate cycle	1.54173e-16	1.14551e-14	INOH	None	PCK2; PCK1; ACO1; MDH2; MDH1; FH; IDH3A; PKLR; OGDH; IDH3B; IDH3G; PC; ACAT1; FAH; DLD; SUCLG2; SUCLG1; CS; ACO2; DLST; SUCLA2; SDHA; SDHB	8803; 6389; 1743; 5091; 4967; 50; 1738; 3420; 2184; 8802; 5313; 3419; 2271; 4191; 8801; 5106; 4190; 48; 6390; 1431; 38; 5105; 3421	32	32			intrinsic prothrombin activation pathway	1.90373e-11	2.65888e-10	BioCarta	intrinsicpathway	F2; F11; F5; KNG1; SERPING1; F10; FGG; FGA; FGB	2147; 710; 2160; 2159; 3827; 2266; 2244; 2153; 2243	23	23
Propanoate metabolism	2.12497e-16	1.52792e-14	EHMN	Propanoate metabolism	DBI; MUT; HADHA; HADHB; EHHADH; ACSS1; PCCA; ALDH2; ACADM; ECHS1; ALDH6A1; ACADSB; ALDH7A1; ALDH1B1; MCEE; ACADL; HIBCH	84532; 36; 501; 26275; 219; 33; 3032; 5095; 4594; 217; 1892; 84693; 1962; 3030; 1622; 34; 4329	18	18			Prion diseases - Homo sapiens (human)	5.23055e-11	7.06968e-10	KEGG	path:hsa05020	C9; C1QC; C1QB; C1QA; C8A; C8B; C8G; C7; C6; C5	712; 713; 714; 727; 729; 730; 731; 732; 733; 735	35	35
Huntington disease - Homo sapiens (human)	7.83939e-16	5.31499e-14	KEGG	path:hsa05016	COX5A; COX5B; NDUFB7; NDUFB6; NDUFB5; NDUFB4; NDUFB3; NDUFB1; RCOR1; PLCB3; UQCRH; COX6B1; UQCRB; DCTN4; NDUFAB1; NDUFV1; NDUFB9; COX6A1; NDUFB11; NDUFB10; AP2M1; UQCR10; NDUFA11; NDUFA12; UQCR11; TFAM; COX6C; NDUFA6; NDUFA7; NDUFA4; NDUFA5; NDUFA2; NDUFA3; SOD1; NDUFA13; COX8A; SLC25A6; SLC25A5; SLC25A4; SDHA; COX4I1; NDUFA8; POLR2B; COX7A2; POLR2I; COX7A2L; TAF4; CYCS; CYC1; NDUFS1; NDUFS3; NDU…	1537; 4696; 374291; 1340; 291; 292; 4695; 4697; 4698; 4700; 4701; 4702; 4706; 4707; 4709; 4710; 4712; 4713; 4711; 4716; 4719; 4724; 4725; 4726; 4728; 23186; 1173; 55967; 4722; 4723; 5331; 7381; 7385; 6874; 7388; 10975; 6389; 6390; 54539; 7384; 1327; 7386; 293; 1329; 5431; 5438; 1347; 1351; 1337; 29796; 7019; 126328; 51079; 4715; 54205; 9377; 1345; 9167; 51164; 6647	193	193			Pertussis - Homo sapiens (human)	7.21376e-11	9.44551e-10	KEGG	path:hsa05133	C4BPA; C4BPB; C1QC; C1QB; C1QA; C3; SERPING1; C5; C2; C1S; C1R; IRAK4; ITGAM	51135; 710; 712; 713; 714; 715; 716; 717; 718; 722; 725; 727; 3684	76	76
Branched-chain amino acid catabolism	7.86877e-16	5.31499e-14	Reactome	R-HSA-70895	IVD; HSD17B10; DLD; ACAD8; AUH; BBOX1; HIBCH; MCCC1; ACAT1; ALDH6A1; BCKDHB; ALDH9A1; ACADSB; BCKDHA; HIBADH; DBT; MCCC2; SHMT1; TMLHE	3028; 3712; 27034; 6470; 549; 1738; 64087; 594; 36; 223; 55217; 26275; 56922; 593; 4329; 11112; 38; 1629; 8424	23	23			extrinsic prothrombin activation pathway	2.19604e-10	2.78831e-09	BioCarta	extrinsicpathway	F2; F5; F7; F10; FGG; FGA; FGB	2243; 2159; 2266; 2147; 2244; 2155; 2153	13	13
superpathway of conversion of glucose to acetyl CoA and entry into the TCA cycle	1.78008e-15	1.16309e-13	HumanCyc	PWY66-407	CS; MDH2; MDH1; FH; ALDOB; IDH3A; PKLR; OGDH; IDH3B; IDH3G; PFKM; PFKL; PDHB; PGK2; PGK1; PDHA1; GPI; DLD; SUCLG2; SUCLG1; ACO1; ACO2; DLST; SUCLA2; DLAT; SDHA; SDHB	8803; 6389; 1743; 50; 3421; 5232; 1738; 3420; 8802; 5313; 3419; 2271; 5160; 1737; 5230; 8801; 229; 48; 4967; 6390; 1431; 4191; 4190; 2821; 5162; 5211; 5213	48	47			Integrin cell surface interactions	2.26588e-10	2.79236e-09	Reactome	R-HSA-216083	VTN; TNC; FN1; CD44; LUM; ITGA11; ITGAM; FBN1; ITGA2B; FGG; FGA; FGB	4060; 960; 7448; 22801; 2266; 2243; 3674; 2200; 2244; 3371; 3684; 2335	67	67
TCA cycle	1.82629e-15	1.16309e-13	HumanCyc	PWY66-398	IDH3A; OGDH; IDH3B; IDH3G; DLD; DLST; SUCLA2; ACO1; SDHB; SUCLG2; CS; SUCLG1; MDH2; MDH1; SDHA; ACO2; FH	8803; 6389; 1743; 8801; 3419; 4967; 50; 1431; 4190; 48; 2271; 1738; 3420; 6390; 3421; 8802; 4191	19	19			fibrinolysis pathway	4.33738e-10	5.19246e-09	BioCarta	fibrinolysispathway	F2; CPB2; SERPINE1; PLG; FGG; FGA; FGB	2147; 2266; 2243; 2244; 5054; 1361; 5340	14	14
Fatty acid degradation - Homo sapiens (human)	2.29574e-15	1.42145e-13	KEGG	path:hsa00071	CPT2; ACADS; ACADVL; ECHS1; ACADL; ACADM; GCDH; ACAT1; HADHB; HADHA; ACAA2; ACAA1; ACOX1; CPT1A; ALDH9A1; ACADSB; ALDH7A1; ALDH1B1; EHHADH; HADH; ADH6; ADH5; ACSL1; ALDH2; ECI2; ECI1	128; 130; 2180; 217; 30; 33; 34; 35; 36; 37; 38; 1962; 223; 51; 1632; 2639; 10449; 3030; 10455; 3032; 3033; 219; 1374; 1376; 1892; 501	44	44			Common Pathway of Fibrin Clot Formation	5.26391e-10	6.12661e-09	Reactome	R-HSA-140875	F2; F5; F13B; F13A1; F10; FGG; FGA; FGB	2147; 2165; 2159; 2266; 2162; 2244; 2153; 2243	22	22
Alzheimer disease - Homo sapiens (human)	2.47478e-15	1.49089e-13	KEGG	path:hsa05010	HSD17B10; COX5A; NDUFB9; UQCR10; NDUFB6; NDUFB5; NDUFB4; NDUFB3; NDUFB1; BAD; PLCB3; NDUFA13; UQCRH; COX6B1; UQCRB; NDUFAB1; NDUFV1; COX5B; APBB1; NDUFB11; NDUFB10; NDUFB7; NDUFA11; NDUFA12; FADD; COX6C; NDUFA6; NDUFA7; NDUFA4; NDUFA5; NDUFA2; NDUFA3; NDUFS6; COX8A; NDUFA8; MME; COX4I1; SDHA; COX7A2; COX6A1; COX7A2L; CYCS; CYC1; UQCR11; NDUFS1; NDUFS3; NDUFS4; NDUFS5; MAPT; NDUFS7; NDUFS8; UQCRFS…	1537; 374291; 4137; 572; 8772; 4695; 4696; 4697; 4698; 4700; 4701; 4702; 4706; 4707; 29796; 4709; 4710; 4711; 4712; 4713; 4715; 4716; 4719; 4722; 4723; 4724; 4725; 4726; 4728; 55967; 9377; 5331; 7381; 4311; 7384; 7385; 7386; 7388; 10975; 6389; 6390; 54539; 1327; 1329; 1337; 1340; 1345; 1347; 1351; 126328; 51079; 322; 54205; 9167; 3028	171	171			Beta3 integrin cell surface interactions	6.29974e-10	6.94629e-09	PID	integrin3_pathway	TNC; FN1; ITGA2B; VTN; COL1A2; FBN1; TGFBI; FGG; FGA; FGB	2266; 7045; 1278; 3674; 7448; 2200; 2244; 3371; 2243; 2335	44	44
Propanoate metabolism - Homo sapiens (human)	3.18963e-15	1.87097e-13	KEGG	path:hsa00640	MUT; PCCB; PCCA; ABAT; ACADM; HADHA; ACAT1; MCEE; LDHB; DLD; ACSS3; ACSS1; SUCLG2; ALDH6A1; SUCLG1; EHHADH; SUCLA2; DBT; ECHS1; BCKDHB; BCKDHA; HIBCH	18; 34; 26275; 38; 1962; 84532; 1738; 593; 594; 84693; 3030; 1629; 8801; 8802; 8803; 1892; 5095; 5096; 4329; 4594; 3945; 79611	32	32			Urokinase-type plasminogen activator (uPA) and uPAR-mediated signaling	6.29974e-10	6.94629e-09	PID	upa_upar_pathway	FGA; FN1; CTSG; VTN; PLG; ITGAM; MMP9; FGG; SERPINE1; FGB	5340; 1511; 2266; 5054; 2243; 7448; 2244; 4318; 3684; 2335	44	44
Glyoxylate and dicarboxylate metabolism - Homo sapiens (human)	7.78411e-15	4.44892e-13	KEGG	path:hsa00630	HOGA1; GRHPR; MUT; MDH1; DLD; PCCB; GLDC; PCCA; AFMID; SHMT2; ACAT1; MDH2; ACO1; HAO2; CS; MCEE; ACO2; ACSS1; AMT; SHMT1; GCSH	125061; 275; 1431; 9380; 38; 2731; 48; 112817; 50; 84532; 4190; 4191; 6470; 6472; 1738; 84693; 2653; 5095; 5096; 51179; 4594	30	30			Allograft Rejection	7.46405e-10	8.01907e-09	Wikipathways	WP2328	CD55; C9; C1QC; C1QB; C1QA; C8A; C8B; COL5A1; C3; C2; C7; C6; C5	718; 717; 714; 713; 712; 731; 730; 732; 735; 727; 729; 1289; 1604	91	91
Saturated fatty acids beta-oxidation	1.28697e-14	7.17167e-13	EHMN	Saturated fatty acids beta-oxidation	DBI; HADH; HSD17B10; ACADS; ACAT1; ACADSB; ACAA2; ACOX2; EHHADH; HADHA; PECR; HADHB; ACAA1; ACOT8; ECHS1; ACOX1; ACADL; ACADM; GCDH	3028; 8309; 2639; 33; 3032; 30; 55825; 10005; 36; 1622; 35; 10449; 3030; 34; 38; 3033; 1892; 51; 1962	25	25			Systemic lupus erythematosus - Homo sapiens (human)	9.60148e-10	1.00576e-08	KEGG	path:hsa05322	C8A; C9; C8G; C1QC; C1QB; C1QA; CTSG; C3; C8B; C2; C1S; C1R; C7; C6; C5	712; 713; 714; 715; 716; 717; 718; 727; 729; 730; 731; 732; 733; 735; 1511	133	132
Mitochondrial protein import	1.49282e-14	8.11584e-13	Reactome	R-HSA-1268020	GRPEL1; CHCHD4; HSPA9; TIMM9; SLC25A13; SLC25A12; TIMM8B; TIMM17B; ACO2; PMPCB; PMPCA; CHCHD5; HSPD1; TIMM13; TIMM10; LDHD; TIMM50; COA4; SLC25A6; SAMM50; FXN; TIMM10B; CS; CMC2; CMC4; IDH3G; SLC25A4; CYC1; TIMM22; TIMM21; COX17	10063; 50; 291; 293; 80273; 26521; 51287; 1537; 26517; 92609; 2395; 84269; 1431; 9512; 56942; 10165; 23203; 26520; 25813; 26515; 8604; 26519; 29090; 3421; 100272147; 3329; 131474; 10245; 3313; 29928; 197257	65	65			Vitamin B12 Metabolism	2.96601e-09	3.03112e-08	Wikipathways	WP1533	CRP; SERPINA3; F7; MPO; F2; SAA1; SERPINE1; PLG; APOE; APOA1	335; 1401; 5054; 6288; 2155; 12; 348; 4353; 5340; 2147	51	51
Pyruvate metabolism - Homo sapiens (human)	1.02102e-13	5.41872e-12	KEGG	path:hsa00620	PCK2; GRHPR; PCK1; ME3; MDH2; MDH1; FH; PKLR; ACAT1; PC; LDHD; GLO1; PDHB; LDHB; PDHA1; DLD; ACSS1; DLAT; ALDH9A1; ALDH7A1; ALDH1B1; ACYP1; ALDH2	197257; 9380; 38; 5160; 5162; 2739; 84532; 4190; 5313; 1737; 1738; 5091; 4191; 217; 219; 223; 97; 3945; 2271; 5105; 5106; 501; 10873	39	39			Initial triggering of complement	4.53802e-09	4.52721e-08	Reactome	R-HSA-166663	FCN2; CRP; CFB; C1QC; MASP1; MASP2; C1QB; C3; C1QA; C2; C1S; C1R; MBL2	629; 2220; 716; 715; 714; 1401; 5648; 717; 4153; 713; 10747; 718; 712	106	105
TCA Cycle (aka Krebs or citric acid cycle)	1.424e-13	7.38162e-12	Wikipathways	WP78	IDH3A; OGDH; IDH3B; IDH3G; DLD; IDH2; SDHB; SUCLG2; CS; SUCLG1; MDH2; DLST; FH; ACO2; SDHA	1738; 2271; 1431; 3421; 3420; 50; 4191; 8801; 8802; 4967; 3419; 6389; 6390; 3418; 1743	17	17			Scavenging by Class A Receptors	5.98139e-09	5.82838e-08	Reactome	R-HSA-3000480	APOE; MASP1; APOA1; COL1A2; COL3A1; FTL; MSR1	335; 4481; 1278; 2512; 348; 5648; 1281	19	19
Propanoate metabolism	3.13634e-13	1.58884e-11	INOH	None	MUT; HADHA; ECHS1; HADHB; PCCA; ALDH6A1; ALDH2; ACADM; ACAA2; ACAA1; ALDH9A1; PCCB; ALDH7A1; ALDH1B1; MCEE; EHHADH; ALDH1A1; LDHB	501; 3032; 5095; 30; 219; 223; 3030; 3945; 216; 4594; 10449; 34; 4329; 84693; 217; 1892; 1962; 5096	25	25			Plasma lipoprotein remodeling	8.70716e-09	8.10733e-08	Reactome	R-HSA-8963899	APOF; APOE; LCAT; ANGPTL4; PLTP; APOC3; APOA1; APOA2	335; 5360; 319; 348; 51129; 345; 336; 3931	30	30
Butanoate metabolism - Homo sapiens (human)	3.71241e-13	1.83888e-11	KEGG	path:hsa00650	HADH; HMGCS2; ACADS; HMGCS1; HMGCL; BDH2; ACSM3; HADHA; ACSM5; ACSM2A; ACSM2B; ACAT1; L2HGDH; OXCT1; ABAT; ECHS1; ALDH5A1; EHHADH; BDH1	7915; 3030; 18; 3033; 6296; 5019; 35; 38; 1962; 56898; 79944; 54988; 3155; 3157; 3158; 123876; 1892; 622; 348158	28	28			Beta2 integrin cell surface interactions	8.70716e-09	8.10733e-08	PID	integrin2_pathway	KNG1; ITGAM; C3; TGFBI; F10; FGG; FGA; FGB	718; 2159; 3827; 2266; 2244; 2243; 3684; 7045	30	30
Di-unsaturated fatty acid beta-oxidation	7.22372e-13	3.50036e-11	EHMN	Di-unsaturated fatty acid beta-oxidation	DBI; HADH; HSD17B10; HADHA; ACAA2; HADHB; EHHADH; ACSL1; ECI1; ECI2; ACAA1; ECHS1; ACOX1; DECR2; DECR1; ACADL; SLC27A2	3028; 26063; 33; 3032; 11001; 2180; 30; 10455; 1622; 1666; 10449; 3030; 1632; 3033; 1892; 51; 1962	23	23			ECM proteoglycans	9.28267e-09	8.4553e-08	Reactome	R-HSA-3000178	DCN; TGFB2; FMOD; TNXB; VCAN; SERPINE1; TNC; ITGA2B; VTN; LUM	7148; 4060; 1462; 1634; 5054; 7042; 3674; 7448; 3371; 2331	57	57
TCA Cycle and Deficiency of Pyruvate Dehydrogenase complex (PDHc)	1.24301e-12	5.89503e-11	Wikipathways	WP2453	CS; IDH3A; OGDH; PDHA1; PCK1; DLD; PC; SUCLG2; ACO1; DLAT; SDHA; MDH1; DLST; FH	5160; 1738; 1737; 2271; 48; 1431; 4190; 3419; 8801; 5091; 4967; 5105; 6389; 1743	16	16			ECM-receptor interaction - Homo sapiens (human)	3.09402e-08	2.75829e-07	KEGG	path:hsa04512	THBS2; FN1; CD44; TNXB; THBS3; VTN; ITGA11; COL1A2; TNC; ITGA2B; COL2A1	1280; 7448; 3371; 2335; 960; 3674; 22801; 7148; 7058; 7059; 1278	82	82
Lysine degradation	5.29471e-12	2.45873e-10	INOH	None	BBOX1; ACAT1; AASS; HADHA; ALDH2; SHMT2; ECHS1; CS; GCDH; ALDH7A1; ALDH1B1; TMLHE; EHHADH; ALDH1A1; SHMT1; ALDH9A1	501; 2639; 6470; 216; 219; 10157; 223; 55217; 3030; 6472; 1431; 38; 217; 1892; 1962; 8424	22	22			Folate Metabolism	4.04186e-08	3.5282e-07	Wikipathways	WP176	CRP; SERPINA3; F7; MPO; F2; SAA1; SERPINE1; PLG; APOA1; FOLR2	335; 5054; 6288; 2155; 1401; 4353; 12; 5340; 2147; 2350	66	66
Omega-6 fatty acid metabolism	6.33805e-12	2.88317e-10	EHMN	Omega-6 fatty acid metabolism	DBI; HADH; HSD17B10; HADHA; ECI2; ACOX2; EHHADH; ACSL1; ECI1; ECH1; ACAA1; HADHB; ECHS1; ACOX1; DECR2; DECR1; ACAA2; SLC27A2	3028; 1891; 8309; 26063; 3032; 11001; 2180; 30; 10455; 1622; 1666; 10449; 3030; 1632; 3033; 1892; 51; 1962	28	28			Cholesterol metabolism - Homo sapiens (human)	4.13745e-08	3.53794e-07	KEGG	path:hsa04979	APOE; LCAT; APOH; ANGPTL4; PLTP; APOC3; APOC1; APOA1; APOA2	51129; 335; 341; 345; 3931; 348; 350; 336; 5360	50	50
Peroxisome - Homo sapiens (human)	7.52228e-12	3.35343e-10	KEGG	path:hsa04146	EPHX2; ACSL1; ACOT8; PECR; PEX14; PEX16; DHRS4; ECH1; ACAA1; ABCD1; SLC27A2; ABCD4; CRAT; SOD1; HMGCL; IDH2; MPV17; NUDT12; DDO; PEX11G; PXMP2; NUDT19; EHHADH; PHYH; PEX1; PIPOX; ACOX2; ACOX1; ECI2; DECR2; HAO2; GSTK1	51; 2180; 4358; 83594; 10455; 2053; 5264; 55825; 10005; 390916; 10901; 373156; 30; 92960; 3155; 1962; 9409; 5826; 5827; 5189; 5195; 26063; 8528; 1891; 215; 3418; 1384; 6647; 51179; 51268; 8309; 11001	83	83			Neutrophil degranulation	5.01627e-08	4.20363e-07	Reactome	R-HSA-6798695	EPX; CD55; HP; QSOX1; AHSG; OLFM4; SERPINA1; SERPINA3; PTX3; CEACAM1; DOK3; C3; RNASE3; CD44; VNN1; CTSG; LTF; FTL; SLPI; ORM1; ORM2; MPO; SLC2A3; ITGAM; MMP9	6590; 8876; 3684; 4353; 12; 634; 1511; 5004; 960; 4057; 4318; 5768; 197; 6037; 6515; 3240; 1604; 8288; 5005; 5806; 2512; 718; 79930; 10562; 5265	490	485
Butanoate metabolism	1.57458e-11	6.88183e-10	EHMN	Butanoate metabolism	DBI; HMGCS2; ACADS; HADHB; BDH2; HADHA; SLC16A7; ECHS1; OXCT1; ALDH2; ALDH7A1; ALDH1B1; SLC25A10; EHHADH; ECHDC2; BDH1	501; 35; 3032; 55268; 219; 9194; 1622; 622; 3030; 3158; 5019; 217; 1892; 1962; 1468; 56898	23	23			HDL remodeling	1.58745e-07	1.3042e-06	Reactome	R-HSA-8964058	PLTP; APOE; LCAT; APOA1; APOC3	335; 3931; 345; 5360; 348	10	10
Glycine, serine and threonine metabolism - Homo sapiens (human)	2.60648e-11	1.11728e-09	KEGG	path:hsa00260	GRHPR; GAMT; SDSL; BHMT; PIPOX; GLDC; DLD; SHMT2; AGXT2; MAOB; MAOA; SARDH; DMGDH; ALDH7A1; GATM; CHDH; GCSH; CTH; AMT; SHMT1; PSPH	64902; 113675; 275; 51268; 4128; 4129; 9380; 29958; 2731; 1757; 55349; 2628; 6470; 2593; 6472; 1738; 5723; 2653; 1491; 501; 635	40	40			miRNA targets in ECM and membrane receptors	2.20896e-07	1.77991e-06	Wikipathways	WP2911	ITGA11; FN1; TNXB; SDC2; THBS2; COL5A1; COL1A2; COL3A1	1289; 6383; 7058; 1278; 22801; 7148; 1281; 2335	44	44
Histidine, lysine, phenylalanine, tyrosine, proline and tryptophan catabolism	3.37595e-11	1.41981e-09	Reactome	R-HSA-6788656	PCBD1; GCDH; OGDH; AASS; PRODH2; AFMID; AMDHD1; FAH; ASRGL1; HNMT; DLD; QDPR; CRYM; ALDH7A1; HGD; ACMSD; ALDH4A1; PIPOX; SLC3A2; DLST; GSTZ1; PRODH; FTCD	501; 1743; 4967; 5625; 8659; 1738; 2184; 2639; 5860; 144193; 10157; 6520; 1428; 51268; 2954; 58510; 10841; 5092; 125061; 80150; 130013; 3176; 3081	49	48			Statin Pathway	2.68624e-07	2.12365e-06	Wikipathways	WP430	APOE; LCAT; PLTP; APOC3; APOC1; APOA1; APOA2	335; 336; 345; 341; 348; 3931; 5360	31	31
Mono-unsaturated fatty acid beta-oxidation	3.81705e-11	1.57559e-09	EHMN	Mono-unsaturated fatty acid beta-oxidation	DBI; HADH; HSD17B10; ACOX1; ACAA2; HADHB; EHHADH; ACSL1; HADHA; ECHS1; ACAA1; ACADSB; ACADL; ACADM; SLC27A2	3028; 36; 2180; 33; 3032; 11001; 1892; 51; 30; 1622; 1962; 10449; 3033; 3030; 34	21	21			Scavenging of heme from plasma	4.8703e-07	3.77899e-06	Reactome	R-HSA-2168880	HP; CD163; HPX; APOA1; APOL1	9332; 335; 8542; 3263; 3240	12	12
Fatty Acid Beta Oxidation	5.46078e-11	2.18105e-09	Wikipathways	WP143	CPT1A; HADH; CPT2; ACADS; DLD; HADHB; ACSL1; HADHA; ACAT1; CRAT; ECHS1; ECI1; ACADVL; ACADL; GCDH; DECR1; GK; ACADM; CHKB	2710; 2639; 1120; 3030; 3032; 3033; 1892; 1738; 1632; 1374; 1376; 2180; 38; 33; 37; 35; 34; 1384; 1666	34	34			Plasma lipoprotein assembly, remodeling, and clearance	7.34913e-07	5.5987e-06	Reactome	R-HSA-174824	APOF; APOE; LCAT; ANGPTL4; PLTP; APOC3; APOC1; APOA1; APOA2	335; 5360; 348; 336; 51129; 341; 319; 345; 3931	69	69
Glycolysis and Gluconeogenesis	5.47954e-11	2.18105e-09	Wikipathways	WP534	PCK1; MPC2; FBP2; MPC1; MDH2; MDH1; PKLR; PC; PFKM; PFKL; GOT2; GOT1; PGK2; LDHB; PGK1; PDHA1; GPI; DLD; DLAT; ALDOB; SLC2A2; FBP1	3945; 5213; 5211; 2806; 2821; 2805; 1738; 2203; 5230; 5091; 5232; 6514; 51660; 5160; 8789; 4190; 4191; 229; 5105; 1737; 5313; 25874	45	45			Collagen formation	9.90695e-07	7.41252e-06	Reactome	R-HSA-1474290	LOXL2; COL14A1; COL8A1; COL5A1; COL1A2; MMP9; PCOLCE; COL3A1; LOX; COL2A1	4017; 1278; 1295; 7373; 4318; 1281; 5118; 1280; 4015; 1289	92	92
Biological oxidations	6.18897e-11	2.42021e-09	Reactome	R-HSA-211859	TRMT112; GSS; UGT2B7; ABHD10; UGT2A3; GSTA1; GSTA3; MGST3; UGT1A9; FDXR; UGT1A6; ALDH1A1; PAPSS1; CYP7B1; CYP4F11; ACSM5; MAOA; CBR3; AS3MT; N6AMT1; CYP51A1; ACY3; ACSS1; ACY1; SULT1C2; UGT2B4; FMO1; MAT2A; MAT2B; NQO2; NAT1; ACSM2A; ACSM2B; ABHD14B; CES2; BPHL; ALDH1B1; AKR7A2; AKR7A3; CNDP2; CMBL; ADH6; ADH5; OPLAH; GLYATL1; GSTM4; ALDH2; CYP27A1; MAOB; SLC35B3; GGT1; GLYAT; MTRR; GSTP1; GSTZ1;…	128; 1595; 216; 670; 4128; 8824; 373156; 874; 2937; 6819; 57834; 4144; 2938; 51000; 54988; 2326; 91703; 54578; 2948; 51504; 219; 95; 2940; 1593; 57412; 9061; 29104; 2232; 55347; 79799; 9; 4835; 26873; 55748; 134147; 22977; 4552; 123876; 130; 2954; 54600; 7363; 23169; 9420; 217; 84836; 348158; 4129; 92292; 4259; 2950; 2678; 84532; 7364; 27430; 8574; 10249	231	226			Amoebiasis - Homo sapiens (human)	1.33614e-06	9.58588e-06	KEGG	path:hsa05146	TGFB2; FN1; C9; CTSG; C8A; C8B; COL1A2; ITGAM; C8G; COL3A1	3684; 731; 732; 733; 735; 1278; 1281; 7042; 2335; 1511	96	95
Peroxisomal protein import	1.76726e-10	6.79175e-09	Reactome	R-HSA-9033241	PECR; EPHX2; PEX14; EHHADH; DHRS4; ECH1; ACAA1; SLC27A2; LONP2; CRAT; HMGCL; MPV17; DDO; ACOT8; NUDT19; ACOT2; PHYH; PEX1; PIPOX; ACOX2; ACOX1; ECI2; UBA52; DECR2; HAO2; GSTK1	1891; 8309; 26063; 11001; 390916; 3155; 30; 55825; 10901; 10455; 373156; 5264; 83752; 51179; 7311; 4358; 10005; 5189; 51268; 10965; 51; 2053; 8528; 1962; 5195; 1384	64	64			Statin Pathway, Pharmacodynamics	1.3498e-06	9.58588e-06	PharmGKB	PA2031	APOE; LCAT; PLTP; APOC3; APOC1; APOA1	335; 341; 345; 3931; 348; 5360	25	25
Butanoate metabolism	2.0013e-10	7.43482e-09	INOH	None	HMGCS1; HSD17B10; ACADS; HADH; HMGCL; HADHA; HMGCS2; ACAT1; DLAT; OXCT1; ECHS1; EHHADH; BDH1	3028; 35; 622; 3157; 5019; 38; 3033; 1892; 3155; 1962; 3158; 3030; 1737	17	17			Hypothesized Pathways in Pathogenesis of Cardiovascular Disease	1.3498e-06	9.58588e-06	Wikipathways	WP3668	LTBP2; LTBP1; FBN1; POSTN; CTGF; SERPINE1	5054; 2200; 4053; 1490; 4052; 10631	25	25
Mitochondrial LC-Fatty Acid Beta-Oxidation	2.0013e-10	7.43482e-09	Wikipathways	WP368	CPT1A; CPT2; PECR; ACADVL; HADH; ACADL; ACSF2; HADHA; ECI1; ACADS; ACSL1; EHHADH; ACADM	80221; 1632; 33; 3030; 37; 1962; 34; 55825; 2180; 35; 1376; 3033; 1374	17	17			Activation of C3 and C5	1.56248e-06	1.09113e-05	Reactome	R-HSA-174577	C3; C2; CFB; C5	718; 629; 717; 727	8	7
Oxidative phosphorylation	3.16403e-10	1.15617e-08	Wikipathways	WP623	NDUFB9; ATP5S; NDUFB6; NDUFB5; NDUFB4; NDUFB1; NDUFAB1; NDUFV1; NDUFB10; NDUFB7; NDUFA11; NDUFA6; NDUFA7; NDUFA4; NDUFA5; NDUFA2; NDUFA3; NDUFA8; NDUFS1; NDUFS3; NDUFS4; NDUFS5; NDUFS6; NDUFS7; NDUFS8	4726; 4723; 4707; 4706; 4697; 4696; 4725; 27109; 4722; 4711; 4724; 374291; 4702; 4715; 4716; 4710; 4701; 4712; 4713; 4700; 4719; 4728; 4698; 4695; 126328	61	61			Creation of C4 and C2 activators	1.621e-06	1.11344e-05	Reactome	R-HSA-166786	FCN2; CRP; C1QC; MASP1; MASP2; C1QB; C1QA; C1S; C1R; MBL2	2220; 716; 715; 714; 1401; 5648; 4153; 713; 10747; 712	97	97
Metabolic reprogramming in colon cancer	7.5174e-10	2.70263e-08	Wikipathways	WP4290	IDH3A; PDHA1; GPI; ACO2; PSPH; IDH2; GLUD1; SDHB; SUCLG2; FH; PFKL; FASN; MDH2; DLST; GOT2; PDHB; GLS; SHMT2; ALDOB; PGK1	5211; 2194; 2806; 2821; 3418; 3419; 2744; 8801; 5160; 5723; 5162; 2746; 4191; 229; 2271; 6472; 6390; 50; 5230; 1743	42	42			Oxidative Damage	1.70197e-06	1.1502e-05	Wikipathways	WP3941	C1QC; C1QB; C1QA; C1R; C1S; C2; C5	714; 717; 716; 715; 713; 712; 727	40	40
valine degradation	7.79792e-10	2.75898e-08	HumanCyc	VALDEG-PWY	DLD; ACAD8; HADHA; DBT; ECHS1; ALDH6A1; BCKDHB; ABAT; BCKDHA; HIBADH; HIBCH	26275; 1738; 27034; 594; 1892; 18; 593; 3030; 1629; 11112; 4329	13	13			GRB2:SOS provides linkage to MAPK signaling for Integrins	1.78113e-06	1.16608e-05	Reactome	R-HSA-354194	ITGA2B; FGG; FN1; FGA; FGB	2243; 3674; 2266; 2244; 2335	15	15
Urea cycle and metabolism of arginine, proline, glutamate, aspartate and asparagine	1.86529e-09	6.49647e-08	EHMN	Urea cycle and metabolism of arginine, proline, glutamate, aspartate and asparagine	GSR; EARS2; PARS2; ALDH7A1; MGST3; OAT; RARS2; ABAT; GLS; SLC25A10; GATM; GOT2; SLC6A12; ACY3; ACY1; ALDH2; DDO; ALDH9A1; AGMAT; ALDH1B1; CRAT; L2HGDH; ALDH4A1; GSTZ1; GLUD2; GLUD1; PRODH; MAOB; MAOA; DARS2; GPX4; ALDH5A1; GSTK1	5625; 25973; 4942; 4128; 2746; 79944; 373156; 4259; 8528; 91703; 501; 79814; 8659; 2879; 57038; 219; 95; 6539; 2628; 124454; 2744; 1384; 55157; 2936; 223; 7915; 2954; 2806; 217; 1468; 4129; 2747; 18	106	105			p130Cas linkage to MAPK signaling for integrins	1.78113e-06	1.16608e-05	Reactome	R-HSA-372708	ITGA2B; FGG; FN1; FGA; FGB	2243; 3674; 2266; 2244; 2335	15	15
Phase II - Conjugation of compounds	2.92962e-09	1.00464e-07	Reactome	R-HSA-156580	TRMT112; GSS; UGT2B7; GSTZ1; UGT2A3; GSTA1; GSTA3; MGST3; UGT1A9; UGT1A6; OPLAH; PAPSS1; ABHD10; GSTP1; AS3MT; N6AMT1; SULT1C2; UGT2B4; MAT2A; MAT2B; NAT1; ACSM2A; ACSM2B; ACSM5; GGT1; ABHD14B; CNDP2; GLYATL1; GSTM4; SLC35B3; GLYAT; MTRR; SLC35D1; GSTK1	373156; 6819; 7364; 4144; 2938; 51000; 123876; 54578; 2948; 2940; 2937; 57412; 9061; 29104; 4552; 55347; 9; 26873; 55748; 2954; 54600; 7363; 23169; 54988; 84836; 348158; 4259; 92292; 2950; 2678; 27430; 79799; 51504; 10249	115	112			Lectin pathway of complement activation	3.08881e-06	1.9911e-05	Reactome	R-HSA-166662	FCN2; MASP1; MASP2; MBL2	2220; 10747; 4153; 5648	8	8
Glycine Serine metabolism	3.56807e-09	1.20503e-07	INOH	None	GAMT; BHMT; NSDHL; DLD; PISD; GLDC; PIPOX; PTGR1; AGXT2; MAOB; MAOA; PSPH; DMGDH; GOT2; GATM; GOT1; CTH; SHMT2; SHMT1	2805; 2593; 6470; 22949; 1738; 2731; 4129; 64902; 635; 29958; 2628; 23761; 4128; 2806; 6472; 51268; 1491; 50814; 5723	41	41			Selenium Micronutrient Network	3.56781e-06	2.26502e-05	Wikipathways	WP15	CRP; SERPINA3; F7; MPO; F2; SAA1; SERPINE1; PLG; APOA1	335; 5054; 6288; 2155; 1401; 4353; 12; 5340; 2147	83	83
superpathway of methionine degradation	4.85122e-09	1.61394e-07	HumanCyc	PWY-5328	MUT; MAT2A; MAT2B; PCCB; PCCA; DLD; DBT; BCKDHB; BCKDHA; MCEE; GOT1; CTH; SUOX	27430; 5095; 594; 4144; 1491; 6821; 4594; 1738; 593; 1629; 5096; 2805; 84693	20	20			amb2 Integrin signaling	5.21251e-06	3.25976e-05	PID	amb2_neutrophils_pathway	MST1; PLG; CTGF; ITGAM; MMP9; MMP2	5340; 1490; 4318; 4313; 3684; 4485	31	31
Pyruvate metabolism	5.56556e-09	1.79792e-07	INOH	None	PKLR; PDHA1; ACYP1; DLD; HMGCL; ALDH2; ACAT1; DLAT; ALDH9A1; ME3; ALDH7A1; ALDH1B1; GLO1; PDHB; ALDH1A1; LDHB; LDHD	501; 216; 3155; 1738; 5313; 219; 97; 223; 1737; 10873; 3945; 5160; 38; 217; 2739; 5162; 197257	34	34			Plasma lipoprotein assembly	6.57271e-06	4.04995e-05	Reactome	R-HSA-8963898	APOE; APOC3; APOA1; APOA2; APOC1	341; 335; 345; 336; 348	19	19
Gluconeogenesis	5.56556e-09	1.79792e-07	Reactome	R-HSA-70263	PCK2; ALDOB; FBP2; SLC25A10; SLC25A13; FBP1; GPI; PC; PCK1; MDH2; MDH1; GOT2; GOT1; PGK2; SLC25A12; SLC25A11; PGK1	5091; 2805; 5232; 5230; 8402; 4191; 10165; 5106; 4190; 229; 8604; 2806; 8789; 2203; 2821; 5105; 1468	35	34			Platelet Aggregation Inhibitor Pathway, Pharmacodynamics	7.00887e-06	4.25611e-05	PharmGKB	PA154444041	F2; ITGA2B; COL1A2; COL3A1; FGG; FGA; FGB	1281; 2244; 3674; 2243; 2266; 2147; 1278	49	49
Arginine Proline metabolism	6.3231e-09	2.01346e-07	INOH	None	GAMT; CKB; SMS; OAT; GLUD1; ABAT; FH; ASS1; ALDH1A1; GATM; GOT2; GOT1; ALDH9A1; ALDH7A1; ALDH1B1; ALDH4A1; GLUD2; ALDH2; MAOB; MAOA; SDHA; SDHB	2805; 2593; 2747; 216; 8659; 501; 1152; 6390; 4942; 4128; 219; 4129; 2271; 223; 6389; 2628; 2806; 445; 2746; 6611; 18; 217	55	55			Inflammatory Response Pathway	7.65068e-06	4.57948e-05	Wikipathways	WP453	IL5RA; FN1; THBS3; VTN; COL1A2; COL3A1	7059; 1278; 1281; 2335; 7448; 3568	33	33
Dimethyl-branched-chain fatty acid mitochondrial beta-oxidation	6.51475e-09	2.04526e-07	EHMN	Dimethyl-branched-chain fatty acid mitochondrial beta-oxidation	HADH; HSD17B10; ACAA2; HADHB; EHHADH; HADHA; ECHS1; ACADSB; ACADL; ACADM	3028; 36; 33; 3032; 3033; 1892; 1962; 10449; 3030; 34	12	12			Chylomicron remodeling	9.0535e-06	5.26863e-05	Reactome	R-HSA-8963901	APOE; APOA1; APOA2; APOC3	335; 345; 336; 348	10	10
2-oxobutanoate degradation	1.16157e-08	3.59604e-07	HumanCyc	PWY-5130	MUT; DLD; PCCB; PCCA; BCKDHB; BCKDHA; MCEE; DBT	84693; 5095; 594; 4594; 1738; 593; 1629; 5096	8	8			Chylomicron assembly	9.0535e-06	5.26863e-05	Reactome	R-HSA-8963888	APOE; APOA1; APOA2; APOC3	335; 345; 336; 348	10	10
Tryptophan metabolism - Homo sapiens (human)	1.64818e-08	5.03258e-07	KEGG	path:hsa00380	AOX1; OGDH; ACAT1; ALDH7A1; HADHA; AFMID; DDC; ALDH2; ACMSD; MAOB; MAOA; ALDH9A1; ECHS1; ALDH1B1; OGDHL; EHHADH; HADH; GCDH	125061; 217; 4128; 4129; 38; 1962; 316; 55753; 2639; 3030; 3033; 219; 130013; 223; 1892; 4967; 1644; 501	40	40			Interleukin-4 and Interleukin-13 signaling	1.29874e-05	7.4544e-05	Wikipathways	WP4066	LBP; FN1; TIMP1; SAA1; COL1A2; ITGAM; MMP9; F13A1; MMP2	3929; 2162; 6288; 3684; 7076; 1278; 4313; 4318; 2335	97	97
Metabolism of vitamins and cofactors	1.81555e-08	5.46873e-07	Reactome	R-HSA-196854	AKR1C3; MUT; RETSAT; AOX1; PCCB; PCCA; NMRK1; MOCS3; TPK1; AKR1C1; GCHFR; QPRT; COASY; AMN; SPR; PDZD11; MCCC2; PC; FASN; MCCC1; NMNAT3; NMNAT1; PTS; ABCD4; CUBN; PDSS2; NUDT12; COQ5; SHMT2; SHMT1; GPHN; LRP2; RNLS; ALDH1L2; HLCS; CYB5A; NFS1; COQ9; RDH11; MTRR; MMAA; COQ7; COQ6; ALDH1L1	83594; 5091; 349565; 3141; 27010; 51004; 160428; 57017; 57107; 9054; 51248; 64802; 166785; 54884; 8029; 5096; 10229; 10840; 84274; 6697; 1528; 27304; 4594; 55328; 1645; 2644; 6470; 10243; 4552; 8644; 6472; 2194; 23475; 5095; 51109; 64087; 80347; 5805; 54981; 81693; 56922; 4036; 316; 5826	181	178			Intrinsic Pathway of Fibrin Clot Formation	1.43581e-05	8.12981e-05	Reactome	R-HSA-140837	KNG1; F2; SERPING1; F10; F11	2147; 710; 2160; 2159; 3827	22	22
Arginine and proline metabolism - Homo sapiens (human)	2.04956e-08	6.09128e-07	KEGG	path:hsa00330	HOGA1; SAT2; GAMT; ALDH4A1; CKB; ALDH7A1; PRODH2; SMS; ALDH2; PRODH; GATM; MAOA; OAT; ALDH9A1; MAOB; AGMAT; ALDH1B1; GOT1; CNDP2; GOT2	1152; 55748; 4128; 2593; 112817; 112483; 2805; 58510; 2628; 79814; 4129; 4942; 6611; 217; 219; 223; 8659; 501; 2806; 5625	50	49			Phagosome - Homo sapiens (human)	1.4645e-05	8.18169e-05	KEGG	path:hsa04145	THBS2; MPO; FCGR2B; THBS3; TUBB1; CD209; ITGAM; C3; C1R; MSR1; MBL2	4153; 3684; 30835; 81027; 2213; 715; 718; 4353; 4481; 7058; 7059	152	151
Glycolysis / Gluconeogenesis - Homo sapiens (human)	2.41244e-08	7.07543e-07	KEGG	path:hsa00010	PCK2; PCK1; FBP1; FBP2; PKLR; PFKM; PFKL; PDHB; PGK2; LDHB; PGK1; PDHA1; GPI; DLD; ACSS1; DLAT; ALDH9A1; ALDH7A1; ALDH1B1; GALM; ALDOB; ADH6; ADH5; ALDH2	128; 130; 2821; 8789; 2203; 5160; 5162; 84532; 219; 1737; 5313; 1738; 130589; 217; 5211; 5213; 223; 229; 3945; 5230; 5232; 5105; 5106; 501	68	68			Platelet Aggregation (Plug Formation)	1.5289e-05	8.42905e-05	Reactome	R-HSA-76009	F2; FN1; ITGA2B; FGG; FGA; FGB	2147; 2266; 3674; 2244; 2243; 2335	37	37
fatty acid &beta;-oxidation	3.12518e-08	9.04679e-07	HumanCyc	FAO-PWY	HADH; HSD17B10; ACAA2; HADHB; EHHADH; ACSL1; ACAA1; ECHS1; ECI1; ECI2; ACADL; SLC27A2	3028; 2180; 1632; 33; 3032; 11001; 1892; 30; 1962; 10449; 3033; 10455	19	19			Degradation of the extracellular matrix	2.46743e-05	0.000134267	Reactome	R-HSA-1474228	DCN; TIMP1; CD44; COL14A1; CTSG; PLG; MMP9; MMP2; HTRA1	1634; 7076; 7373; 4318; 1511; 4313; 5654; 5340; 960	105	105
Proximal tubule bicarbonate reclamation - Homo sapiens (human)	5.33082e-08	1.493e-06	KEGG	path:hsa04964	PCK2; PCK1; FXYD2; MDH1; AQP1; CA2; GLUD2; GLUD1; ATP1B1; SLC4A4; ATP1A1; GLS; SLC25A10	2744; 2746; 2747; 1468; 476; 4190; 8671; 481; 358; 486; 5105; 5106; 760	23	23			Dissolution of Fibrin Clot	2.97697e-05	0.000159917	Reactome	R-HSA-75205	PLG; HRG; SERPINE1; SERPINF2	5345; 5054; 5340; 3273	13	13
mitochondrial fatty acid beta-oxidation of saturated fatty acids	5.35845e-08	1.493e-06	Reactome	R-HSA-77286	HADH; ACADS; HADHB; ACSM3; HADHA; ECHS1; ACADVL; ACADL; ACADM	35; 33; 3032; 6296; 3033; 1892; 37; 3030; 34	11	11			Ficolins bind to repetitive carbohydrate structures on the target cell surface	3.10837e-05	0.000164862	Reactome	R-HSA-2855086	FCN2; MASP1; MASP2	2220; 5648; 10747	5	5
3-oxo-10R-octadecatrienoate beta-oxidation	5.35845e-08	1.493e-06	EHMN	3-oxo-10R-octadecatrienoate beta-oxidation	HADH; HSD17B10; HADHA; ACAA2; HADHB; ACOX1; ECHS1; DECR1; EHHADH	3028; 3032; 3033; 1892; 51; 1962; 10449; 3030; 1666	11	11			Integrin alphaIIb beta3 signaling	4.14524e-05	0.000214427	Reactome	R-HSA-354192	ITGA2B; FGG; FN1; FGA; FGB	2266; 3674; 2244; 2243; 2335	27	27
Glycolysis and Gluconeogenesis	6.19131e-08	1.70376e-06	EHMN	Glycolysis and Gluconeogenesis	PCK2; PCK1; ALDH1B1; ALDH2; ME3; SLC25A10; PDHX; PC; PFKM; PFKL; PDHB; PGK2; PDHA1; GPI; DLD; ACSS1; DLAT; ALDH9A1; ALDH7A1; CS; ALDOB; SLC16A7; ADHFE1	5091; 501; 10873; 5232; 1738; 217; 219; 5211; 137872; 223; 5160; 1737; 5106; 1468; 229; 8050; 1431; 84532; 9194; 2821; 5162; 5105; 5213	67	66			Integrin signaling	4.14524e-05	0.000214427	Reactome	R-HSA-9006921	ITGA2B; FGG; FN1; FGA; FGB	2266; 3674; 2244; 2243; 2335	27	27
Glutamate Glutamine metabolism	7.00215e-08	1.90339e-06	INOH	None	GSS; GSR; ALDH4A1; ALDH2; GLUD2; GLUD1; GPT; ALDH9A1; ABAT; ALDH7A1; ALDH1B1; ALDH5A1; GLS; ALDH1A1	501; 2747; 216; 2937; 8659; 7915; 2746; 219; 2936; 223; 2875; 2744; 18; 217	27	27			Lung fibrosis	4.20497e-05	0.000214864	Wikipathways	WP3624	SERPINA1; ELN; TIMP1; PTX3; CTGF; MMP9; MMP2	4313; 7076; 5806; 4318; 1490; 5265; 2006	64	64
beta-Alanine metabolism - Homo sapiens (human)	7.84177e-08	2.10594e-06	KEGG	path:hsa00410	ECHS1; HADHA; SMS; ALDH2; HIBCH; DPYS; ALDH1B1; ALDH6A1; ALDH9A1; ABAT; ALDH7A1; UPB1; EHHADH; ACADM; CNDP2	1807; 18; 51733; 34; 26275; 1962; 55748; 6611; 3030; 217; 219; 223; 1892; 4329; 501	31	31			Collagen chain trimerization	4.26042e-05	0.000215074	Reactome	R-HSA-8948216	COL8A1; COL14A1; COL5A1; COL1A2; COL3A1; COL2A1	1280; 1295; 7373; 1281; 1278; 1289	44	44
superpathway of choline degradation to L-serine	1.14274e-07	3.03235e-06	HumanCyc	PWY66-414	BHMT; SARDH; DMGDH; ALDH7A1; CHDH; SHMT2; SHMT1	55349; 635; 29958; 501; 1757; 6472; 6470	7	7			Retinoid metabolism and transport	4.85599e-05	0.000242221	Reactome	R-HSA-975634	APOE; SDC2; APOM; APOC3; APOA1; APOA2	335; 348; 6383; 55937; 345; 336	45	45
Metabolism of water-soluble vitamins and cofactors	1.23215e-07	3.23114e-06	Reactome	R-HSA-196849	MUT; AOX1; PCCB; PCCA; NMRK1; MOCS3; TPK1; QPRT; COASY; AMN; PDZD11; MCCC2; PC; FASN; MCCC1; NMNAT3; NMNAT1; ABCD4; CUBN; NUDT12; SHMT2; SHMT1; GPHN; ALDH1L2; HLCS; CYB5A; NFS1; MTRR; MMAA; RNLS; ALDH1L1	5091; 83594; 349565; 3141; 27010; 160428; 9054; 51248; 64802; 166785; 8029; 5096; 10840; 1528; 27304; 4594; 55328; 4552; 6470; 10243; 6472; 2194; 23475; 5095; 64087; 80347; 54981; 81693; 56922; 316; 5826	114	111			Scavenging by Class B Receptors	6.149e-05	0.000303109	Reactome	R-HSA-3000471	APOA1; SAA1; SSC5D	335; 6288; 284297	6	6
leucine degradation	1.94794e-07	4.93403e-06	HumanCyc	LEU-DEG2-PWY	IVD; DLD; HMGCL; AUH; MCCC2; BCKDHB; BCKDHA; DBT; MCCC1	1738; 3712; 56922; 594; 3155; 549; 593; 1629; 64087	12	12			Collagen biosynthesis and modifying enzymes	6.24368e-05	0.000304198	Reactome	R-HSA-1650814	COL8A1; COL14A1; COL5A1; COL1A2; PCOLCE; COL3A1; COL2A1	1280; 1295; 1278; 7373; 1289; 1281; 5118	68	68
isoleucine degradation	1.94794e-07	4.93403e-06	HumanCyc	ILEUDEG-PWY	HSD17B10; HADHA; ACAT1; DLD; ECHS1; BCKDHB; ACADSB; BCKDHA; DBT	3028; 1892; 1738; 38; 594; 36; 593; 3030; 1629	12	12			Metabolism of vitamins and cofactors	6.70842e-05	0.000323084	Reactome	R-HSA-196854	APOE; PTGIS; VNN1; VNN2; SDC2; APOM; SLC2A3; APOA2; APOC3; APOA1; FOLR2	336; 348; 8875; 6515; 345; 2350; 55937; 335; 5740; 6383; 8876	181	178
Trihydroxycoprostanoyl-CoA beta-oxidation	1.94794e-07	4.93403e-06	EHMN	Trihydroxycoprostanoyl-CoA beta-oxidation	HADH; HSD17B10; HADHA; ECHS1; ACOX2; ACOX1; HADHB; ACAA1; EHHADH	3028; 8309; 3032; 3033; 1892; 51; 30; 1962; 3030	12	12			Regulation of TLR by endogenous ligand	7.31866e-05	0.000348468	Reactome	R-HSA-5686938	LBP; FGG; FGA; FGB	2243; 2266; 3929; 2244	16	16
Peroxisomal lipid metabolism	2.22304e-07	5.5676e-06	Reactome	R-HSA-390918	CRAT; PECR; PHYH; ACOX2; ACOX1; ECI2; ACAA1; ACOT8; ABCD1; DECR2; HAO2; NUDT19; EHHADH; SLC27A2	8309; 26063; 11001; 390916; 30; 55825; 51179; 215; 10005; 10455; 5264; 51; 1962; 1384	29	29			Metabolism of fat-soluble vitamins	7.93837e-05	0.000373728	Reactome	R-HSA-6806667	APOE; SDC2; APOM; APOC3; APOA1; APOA2	335; 348; 6383; 55937; 345; 336	49	49
TP53 Regulates Metabolic Genes	2.29559e-07	5.6854e-06	Reactome	R-HSA-5628897	GSR; LRPPRC; COX5B; PRKAG1; PRKAG2; PRKAA2; CYCS; SCO2; COX6B1; GLS; TSC2; COX5A; TXN; COX8A; SURF1; TSC1; COX6C; NDUFA4; GPI; COX4I1; MLST8; COX6A1; COX7A2L; PTEN; LAMTOR4; LAMTOR5	64223; 5571; 7295; 1327; 1351; 2821; 5563; 1329; 51422; 7249; 54205; 5728; 2744; 10542; 9167; 9377; 6834; 2936; 10128; 9997; 7248; 389541; 1345; 1337; 4697; 1340	86	86			Activation of Matrix Metalloproteinases	8.31595e-05	0.000387154	Reactome	R-HSA-1592389	PLG; MMP9; MMP2; TIMP1; CTSG	1511; 5340; 7076; 4318; 4313	31	31
Leukotriene metabolism	2.5833e-07	6.2589e-06	EHMN	Leukotriene metabolism	CYP4F11; HSD17B10; ACSL1; MGST3; ADHFE1; ECHS1; HADHB; ACOT2; DHRS4; HADHA; CBR1; CBR3; ACAA2; ACAA1; ACOT1; ALDH9A1; ACOT8; ALDH7A1; ALDH1B1; EHHADH; SLC27A2; HADH; ACOX2; ACOX1; GSTZ1; ALDH2; ECI2; DECR2; GSTK1	8309; 641371; 373156; 137872; 874; 4259; 10449; 873; 3033; 501; 10005; 219; 3030; 51; 1962; 26063; 3032; 11001; 10455; 10901; 223; 2954; 30; 217; 1892; 3028; 2180; 57834; 10965	105	103			Protein alkylation leading to liver fibrosis	8.91112e-05	0.000410303	Wikipathways	WP3980	TIMP1; CD163; CTGF; COL1A2; COL3A1; MMP2	7076; 1278; 4313; 9332; 1490; 1281	50	50
Liver steatosis AOP	2.5833e-07	6.2589e-06	Wikipathways	WP4010	CPT2; PECR; ACADS; PRKAG1; PRKAG2; HSD17B10; ACADVL; UGT1A9; UGT1A6; ACADL; ACADM; ECH1; HADHA; ACAA2; ABCB1; FASN; CPT1A; HMGCS2; ACSF2; PRKAA2; EHHADH; HADH; ACSL1; ECHS1; ECI1; PRKAR2B; DECR1; ECHDC3; ECHDC2	54600; 80221; 1374; 1376; 55825; 10449; 3030; 3033; 1666; 3028; 5563; 5571; 3158; 33; 37; 35; 34; 55268; 2194; 1632; 79746; 2180; 5577; 5243; 51422; 1891; 1892; 1962; 54578	103	103			Syndecan-4-mediated signaling events	9.73859e-05	0.000443529	PID	syndecan_4_pathway	PLG; F2; FN1; TNC; MMP9	2147; 5340; 4318; 3371; 2335	32	32
Trans-sulfuration pathway	3.30324e-07	7.83289e-06	Wikipathways	WP4253	CRAT; GSS; MAT2A; BHMT; CKB; MAT2B; DLD; MPST; GGT1; BCKDHB; MDH2; MDH1; BCKDHA; GOT2; GOT1; CTH; DBT; LDHB	593; 594; 635; 3945; 27430; 2806; 2805; 1738; 4144; 2937; 4190; 4191; 4357; 1491; 1629; 1384; 2678; 1152	47	47			miR-509-3p alteration of YAP1-ECM axis	0.000120232	0.000541691	Wikipathways	WP3967	COL3A1; COL5A1; THBS2; FN1	7058; 1281; 2335; 1289	18	18
Cysteine and methionine metabolism - Homo sapiens (human)	3.30324e-07	7.83289e-06	KEGG	path:hsa00270	ADI1; GSS; MAT2A; BHMT; MAT2B; SMS; AGXT2; MPST; BHMT2; MDH2; MDH1; MRI1; GOT2; SDSL; TST; GOT1; CTH; LDHB	4357; 113675; 84245; 64902; 27430; 4144; 4191; 23743; 6611; 55256; 4190; 7263; 3945; 1491; 2805; 2806; 2937; 635	47	47			Peptide hormone metabolism	0.0001241	0.000553169	Reactome	R-HSA-2980736	SEC11C; CPB2; CTSG; INHBC; BCHE; INHBE	1361; 1511; 83729; 590; 90701; 3626	53	53
Sulfur amino acid metabolism	3.6101e-07	8.47044e-06	Reactome	R-HSA-1614635	ADI1; BHMT; MTRR; TXN2; MPST; BHMT2; MRI1; GOT2; TST; GOT1; CTH; SUOX; SLC25A10	2805; 55256; 1491; 6821; 25828; 84245; 7263; 635; 2806; 4552; 4357; 1468; 23743	27	26			Signaling by high-kinase activity BRAF mutants	0.000131381	0.000579461	Reactome	R-HSA-6802948	ITGA2B; FGG; FN1; FGA; FGB	3674; 2266; 2244; 2243; 2335	34	34
Pyruvate metabolism	3.77721e-07	8.77022e-06	Reactome	R-HSA-70268	PDHX; PDHA1; MPC2; DLD; MPC1; GSTZ1; PDK2; PDP1; PDPR; DLAT; PDK4; GLO1; PDHB; LDHB	5166; 1738; 55066; 5160; 1737; 5162; 5164; 8050; 54704; 2954; 3945; 51660; 25874; 2739	30	30			inhibition of matrix metalloproteinases	0.000168444	0.000735186	BioCarta	reckpathway	MMP2; TIMP1; MMP9	4313; 7076; 4318	8	8
fatty acid &beta;-oxidation (peroxisome)	4.21664e-07	9.68957e-06	HumanCyc	PWY66-391	HADH; HSD17B10; ACOX1; ECHS1; ACOX2; ACSL1; HADHB; ACAA1; EHHADH; ACAA2; SLC27A2	3028; 2180; 8309; 3032; 11001; 1892; 51; 30; 1962; 10449; 3033	19	19			Signaling by RAS mutants	0.000173791	0.000750708	Reactome	R-HSA-6802949	ITGA2B; FGG; FN1; FGA; FGB	3674; 2266; 2244; 2243; 2335	36	36
Regulation of pyruvate dehydrogenase (PDH) complex	5.37395e-07	1.2223e-05	Reactome	R-HSA-204174	PDHX; PDHA1; DLD; GSTZ1; PDP1; PDPR; PDK2; PDK4; DLAT; PDHB	5166; 54704; 2954; 55066; 5164; 8050; 1738; 1737; 5160; 5162	16	16			MAP2K and MAPK activation	0.000225925	0.000942868	Reactome	R-HSA-5674135	ITGA2B; FGG; FN1; FGA; FGB	3674; 2244; 2243; 2266; 2335	38	38
PPAR signaling pathway - Homo sapiens (human)	6.55535e-07	1.47595e-05	KEGG	path:hsa03320	PCK2; ACSL1; FABP4; PCK1; FABP3; FABP1; PLIN2; ACADM; ACADL; CPT2; EHHADH; ACAA1; CPT1A; HMGCS2; RXRB; GK; SLC27A2; DBI; ACOX2; ACOX1; CYP27A1; FABP5; PDPK1	5106; 2180; 3158; 30; 34; 1962; 5170; 51; 1374; 1593; 1622; 11001; 1376; 123; 33; 2710; 6257; 5105; 8309; 2167; 2168; 2170; 2171	74	74			Signaling by moderate kinase activity BRAF mutants	0.000225925	0.000942868	Reactome	R-HSA-6802946	ITGA2B; FGG; FN1; FGA; FGB	3674; 2266; 2244; 2243; 2335	38	38
Lysine degradation - Homo sapiens (human)	7.44192e-07	1.6588e-05	KEGG	path:hsa00310	COLGALT2; HADH; OGDH; PIPOX; AASS; DLST; HADHA; ALDH2; SETD1A; ACAT1; ALDH9A1; BBOX1; ECHS1; ALDH1B1; ALDH7A1; SETD3; OGDHL; EHHADH; GCDH; TMLHE	9739; 217; 219; 38; 1962; 10157; 55217; 51268; 55753; 1743; 3030; 23127; 3033; 2639; 223; 84193; 1892; 4967; 8424; 501	59	59			Paradoxical activation of RAF signaling by kinase inactive BRAF	0.000225925	0.000942868	Reactome	R-HSA-6802955	ITGA2B; FGG; FN1; FGA; FGB	3674; 2266; 2244; 2243; 2335	38	38
Glycolysis Gluconeogenesis	8.80306e-07	1.92373e-05	INOH	None	PKLR; LDHD; GPI; FBP2; PFKFB2; GLB1; AGXT2; PC; PFKM; PFKL; FBP1; ME3; GPT; ALDOB; PGK2; LDHB; PGK1	5091; 2875; 5208; 10873; 5232; 2720; 5313; 5211; 2821; 5230; 64902; 8789; 3945; 229; 2203; 5213; 197257	46	45			Post-translational protein modification	0.000227278	0.000942868	Reactome	R-HSA-597592	TIMP1; CD55; QSOX1; VCAN; AHSG; ITIH2; APOA1; APOA2; SERPINA1; APOE; ADAMTSL4; THBS2; FSTL1; CP; TF; FGG; FGA; APOL1; C3; LTBP1; VNN2; PSME4; VNN1; TUBB1; IGFBP3; OTUD7B; TNC; MXRA8; F10; FBN1; F2; F5; FN1; F7; SDC2; KNG1; FOLR2	2147; 8542; 8875; 7018; 7058; 4052; 54507; 2159; 7076; 3698; 81027; 335; 6383; 348; 5265; 8876; 2335; 2350; 54587; 5768; 2200; 2153; 23198; 336; 3371; 56957; 2266; 3827; 1462; 1356; 3486; 197; 11167; 2155; 1604; 718; 2243	1383	1378
Signaling by Retinoic Acid	8.80306e-07	1.92373e-05	Reactome	R-HSA-5362517	PDHX; CPT1A; PDHA1; DLD; DHRS4; DHRS3; RXRB; PDK2; ALDH8A1; DLAT; RDH11; FABP5; PDHB; AKR1C3; ALDH1A1; CHKB; PDK4	5166; 9249; 216; 51109; 1738; 10901; 5160; 1737; 5164; 2171; 6257; 8050; 8644; 1374; 1120; 64577; 5162	45	45			Integrins in angiogenesis	0.000325047	0.00133524	PID	avb3_integrin_pathway	FN1; VTN; COL5A1; COL1A2; COL3A1; COL2A1	1280; 7448; 1281; 1278; 2335; 1289	63	63
Ribosome - Homo sapiens (human)	1.26651e-06	2.74083e-05	KEGG	path:hsa03010	MRPL24; MRPL27; MRPL20; MRPL23; MRPL22; MRPL28; MRPS17; MRPS16; MRPS15; MRPS11; MRPL15; MRPS9; RPL26; MRPL33; MRPS7; MRPL10; MRPL11; MRPL12; MRPL14; RPS23; MRPL16; MRPL18; MRPS6; MRPS5; MRPS2; RPS29; MRPL4; MRPL2; MRPL3; MRPL1; RPL3; MRPL9; RPL26L1; RPL35; MRPS21; UBA52	6150; 6154; 6182; 51264; 124995; 6228; 6235; 7311; 54948; 51373; 54460; 79590; 55052; 10573; 51069; 65003; 51073; 51081; 65005; 29074; 64928; 65008; 29093; 51116; 51121; 64960; 29088; 64963; 64965; 64968; 64969; 51021; 11222; 11224; 9553; 6122	153	153			Gamma-carboxylation of protein precursors	0.000353145	0.00140922	Reactome	R-HSA-159740	F2; F10; F7	2147; 2159; 2155	10	10
Metabolism of proteins	1.30587e-06	2.79883e-05	Reactome	R-HSA-392499	TRMT112; PECR; PARS2; HSPA9; SUMO2; ETFB; LRRC41; EIF2B3; RARS2; ALPL; ACO2; MRPS24; USP25; SLC25A13; SLC25A12; OTUD7A; MRPL3; NUDT19; HSPD1; TSFM; COMMD3; DHRS4; ASB9; COMMD7; NDC1; COMMD5; MRPL55; PTCD3; MRPL50; MRPL52; MPI; CTSH; MRPL33; MRPS9; TRIM24; PRMT3; MRPS5; CTSD; MRPS2; MRPL38; COG4; COMMD1; FUOM; TIMM10B; ACOT8; ACOT2; NANS; TRAPPC9; MRPS17; MRRF; TUBB4B; SLC25A4; PIPOX; RBBP5; MSRA;…	63971; 59272; 54534; 1509; 54344; 64963; 440138; 80273; 29761; 84961; 128308; 1384; 51650; 4287; 51116; 64122; 9609; 10196; 25879; 293; 51035; 5694; 83752; 23137; 51073; 64949; 1643; 161725; 79590; 11224; 8604; 3421; 10455; 29093; 29090; 26517; 4253; 23203; 7295; 7818; 6903; 23243; 64841; 1891; 7284; 64965; 6154; 23708; 5195; 10121; 25973; 6905; 84269; 267; 6727; 29928; 124454; 22921; 65008; 6122…	2008	1999			Removal of aminoterminal propeptides from gamma-carboxylated proteins	0.000353145	0.00140922	Reactome	R-HSA-159782	F2; F10; F7	2147; 2159; 2155	10	10
fig-met-1-last-solution	1.46452e-06	3.10897e-05	Wikipathways	WP3961	OGDH; IDH2; SUCLA2; PRKAA2; SDHA; FASN; MDH2; FH; ACO2	50; 4191; 2194; 8803; 4967; 2271; 5563; 6389; 3418	14	14			Crosslinking of collagen fibrils	0.000353145	0.00140922	Reactome	R-HSA-2243919	PCOLCE; LOX; LOXL2	4015; 5118; 4017	10	10
Retrograde endocannabinoid signaling - Homo sapiens (human)	1.56394e-06	3.2887e-05	KEGG	path:hsa04723	NDUFB9; NDUFB7; NDUFB6; NDUFB5; NDUFB4; NDUFB3; NDUFB1; PLCB3; NDUFAB1; NDUFV1; NDUFB11; NDUFB10; NDUFA11; NDUFA12; NDUFA13; MAPK8; NDUFA6; NDUFA7; NDUFA4; NDUFA5; NDUFA2; NDUFA3; NDUFA8; ABHD6; ADCY5; ADCY6; FAAH; ADCY9; NDUFS1; NDUFS3; NDUFS4; NDUFS5; NDUFS6; NDUFS7; NDUFS8	4695; 4723; 57406; 54539; 4696; 4697; 4698; 4700; 4701; 4702; 4706; 4707; 4709; 4710; 4711; 4712; 4713; 111; 112; 115; 4724; 4725; 2166; 4728; 4715; 4716; 55967; 4722; 4726; 5331; 126328; 51079; 4719; 5599; 374291	148	148			Protein digestion and absorption - Homo sapiens (human)	0.000366244	0.0014477	KEGG	path:hsa04974	ELN; COL14A1; CPB2; COL5A1; COL1A2; COL3A1; COL2A1	7373; 1278; 1280; 1281; 1289; 1361; 2006	90	90
Alanine Aspartate Asparagine metabolism	1.79571e-06	3.74078e-05	INOH	None	PKLR; ASPA; UPB1; GOT2; AGXT2; PC; DDO; ABAT; GPT; ADSSL1; GOT1; ASS1	5091; 2805; 2875; 51733; 5313; 443; 64902; 2806; 445; 18; 122622; 8528	25	25			Glycosaminoglycan metabolism	0.000380572	0.00149028	Reactome	R-HSA-1630316	DCN; NDST1; SDC2; VCAN; FMOD; CD44; PRELP; LUM	1634; 3340; 4060; 5549; 2331; 1462; 960; 6383	119	119
One carbon metabolism and related pathways	1.87532e-06	3.87046e-05	Wikipathways	WP3940	PCYT1A; GSS; GSR; MAT2A; PLD1; SOD1; PCYT2; DMGDH; GPX4; AGXT2; SARDH; BHMT2; SHMT1; CHDH; CTH; SHMT2; CHKB; BHMT	6470; 55349; 1120; 5337; 5130; 4144; 6647; 1757; 23743; 635; 29958; 2936; 2937; 2879; 1491; 5833; 64902; 6472	52	52			Syndecan-1-mediated signaling events	0.000408149	0.00158347	PID	syndecan_1_pathway	COL1A2; COL3A1; COL5A1; COL2A1; MMP9	1280; 4318; 1281; 1278; 1289	43	43
PPAR signaling pathway	2.24063e-06	4.54074e-05	Wikipathways	WP3942	CPT1A; DBI; HMGCS2; ACSL1; PCK1; ACOX2; ACADL; CPT2; FABP4; RXRB; CYP27A1; ACAA1; FABP5; FABP3; PCK2; FABP1; PDPK1; ACOX1; EHHADH; ACADM; SLC27A2	5170; 8309; 1962; 2170; 2171; 1374; 1376; 1622; 2180; 1593; 3158; 5106; 5105; 11001; 33; 30; 51; 34; 2168; 2167; 6257	68	68			Gamma-carboxylation, transport, and amino-terminal cleavage of proteins	0.000480301	0.0018463	Reactome	R-HSA-159854	F2; F10; F7	2147; 2159; 2155	11	11
Glucose metabolism	2.24083e-06	4.54074e-05	Reactome	R-HSA-70326	PCK2; PPP2R1B; PCK1; MDH1; GNPDA2; GNPDA1; FBP1; FBP2; SLC25A13; SLC25A12; SLC25A11; SLC25A10; PKLR; NDC1; PC; PFKM; PFKL; GOT2; GOT1; PGK2; PGK1; GPI; ALDOB; PFKFB2; MDH2	5091; 5313; 8402; 5519; 8789; 2821; 5208; 4191; 5230; 132789; 5106; 5105; 5232; 5211; 229; 2806; 2203; 1468; 5213; 2805; 55706; 10165; 8604; 10007; 4190	91	90			PPAR Alpha Pathway	0.000535533	0.00203989	Wikipathways	WP2878	PLTP; APOA1; APOA2; APOC3	335; 336; 345; 5360	26	26
Fatty Acid Biosynthesis	2.94279e-06	5.90944e-05	Wikipathways	WP357	HADH; PECR; ECHS1; PC; ACSL1; ECH1; FASN; DECR1; ECHDC3; ECHDC2; ACAA2	55268; 2194; 1891; 1892; 79746; 55825; 2180; 10449; 3033; 5091; 1666	22	22			Focal Adhesion-PI3K-Akt-mTOR-signaling pathway	0.000553652	0.00208991	Wikipathways	WP3932	THBS2; FN1; ITGA2B; SLC2A3; THBS3; TNXB; VTN; ITGA11; COL1A2; TNC; COL3A1; COL5A1; COL2A1	7058; 7059; 7448; 6515; 3371; 3674; 7148; 22801; 2335; 1278; 1281; 1280; 1289	302	302
Alanine, aspartate and glutamate metabolism - Homo sapiens (human)	3.68524e-06	7.33429e-05	KEGG	path:hsa00250	GOT1; ALDH4A1; ASPA; GLUD2; GLUD1; AGXT2; GOT2; DDO; ABAT; GPT; ALDH5A1; ADSSL1; GLS; ASS1	7915; 64902; 18; 2746; 443; 445; 2747; 8528; 2744; 8659; 2875; 2805; 2806; 122622	35	35			Metabolism of proteins	0.000625983	0.00234185	Reactome	R-HSA-392499	TIMP1; CD55; QSOX1; VCAN; BCHE; AHSG; FBN1; ITIH2; APOA1; APOA2; SERPINA1; APOE; ADAMTSL4; THBS2; FSTL1; INHBC; CP; INHBE; TF; FGG; FGA; APOL1; C3; IGF2; LTBP1; VNN2; PSME4; VNN1; SEC11C; CTSG; IGFBP3; OTUD7B; TNC; MXRA8; F10; TUBB1; F2; F5; FN1; F7; SDC2; KNG1; CPB2; IGFALS; PLG; MMP2; FOLR2	1361; 83729; 8542; 8875; 7018; 3483; 4052; 1511; 54507; 2159; 7076; 3698; 81027; 335; 6383; 590; 348; 4313; 5265; 8876; 2335; 2147; 7058; 2350; 54587; 5768; 2200; 2153; 23198; 3371; 56957; 2266; 5340; 3626; 3827; 1462; 336; 1356; 3486; 197; 11167; 2155; 1604; 718; 90701; 2243; 3481	2008	1999
Lysine catabolism	3.94064e-06	7.77317e-05	Reactome	R-HSA-71064	OGDH; PIPOX; AASS; DLST; DLD; CRYM; ALDH7A1; GCDH	1428; 501; 1743; 10157; 4967; 51268; 1738; 2639	12	12			Assembly of collagen fibrils and other multimeric structures	0.000684006	0.00253627	Reactome	R-HSA-2022090	PCOLCE; LOXL2; COL8A1; LOX; MMP9	4017; 1295; 4318; 4015; 5118	48	48
Histidine metabolism - Homo sapiens (human)	5.12025e-06	0.000100114	KEGG	path:hsa00340	ASPA; AMDHD1; ALDH2; MAOB; MAOA; FTCD; ALDH9A1; ALDH7A1; ALDH1B1; HNMT; CNDP2	10841; 4128; 4129; 443; 144193; 55748; 217; 219; 223; 3176; 501	23	23			Focal Adhesion	0.000721908	0.00265333	Wikipathways	WP306	THBS2; FN1; ITGA2B; TNXB; THBS3; VTN; ITGA11; COL1A2; TNC; COL2A1	7059; 7448; 3674; 7058; 7148; 22801; 2335; 3371; 1278; 1280	198	198
Tryptophan degradation	5.38146e-06	0.000104307	INOH	None	HADH; HSD17B10; HADHA; ACAT1; QPRT; CYP4F11; AFMID; ALDH2; ACMSD; ECHS1; MAOB; MAOA; ALDH1B1; ALDH9A1; ALDH7A1; DDC; EHHADH; ALDH1A1; GCDH; AOX1	3028; 501; 4129; 1644; 216; 3033; 4128; 219; 223; 57834; 3030; 2639; 38; 217; 1892; 23475; 125061; 1962; 316; 130013	69	66			Focal adhesion - Homo sapiens (human)	0.00075053	0.00273454	KEGG	path:hsa04510	TNXB; FN1; ITGA2B; THBS2; THBS3; VTN; ITGA11; COL1A2; TNC; COL2A1	3674; 22801; 2335; 1280; 7448; 3371; 7058; 7059; 7148; 1278	199	199
Ketone body metabolism	1.03743e-05	0.000197643	Reactome	R-HSA-74182	ACSS3; HMGCS2; HMGCL; ACAT1; OXCT1; BDH2; BDH1	622; 5019; 38; 3155; 79611; 3158; 56898	10	10			Chagas disease (American trypanosomiasis) - Homo sapiens (human)	0.000780367	0.00281874	KEGG	path:hsa05142	TGFB2; C1QC; C1QB; C1QA; C3; SERPINE1; IRAK4	712; 713; 714; 718; 7042; 5054; 51135	102	102
Synthesis and degradation of ketone bodies - Homo sapiens (human)	1.03743e-05	0.000197643	KEGG	path:hsa00072	HMGCS1; HMGCS2; HMGCL; ACAT1; OXCT1; BDH2; BDH1	56898; 38; 622; 3155; 3157; 3158; 5019	10	10			Proteoglycans in cancer - Homo sapiens (human)	0.000810585	0.00290286	KEGG	path:hsa05205	DCN; IGF2; TGFB2; FN1; CD44; SDC2; VTN; MMP9; MMP2; LUM	1634; 7448; 2335; 4313; 4318; 6383; 7042; 3481; 960; 4060	201	201
glycine betaine degradation	1.10374e-05	0.000200019	HumanCyc	PWY-3661-1	SARDH; SHMT1; BHMT; SHMT2; DMGDH	635; 29958; 1757; 6472; 6470	5	5			Vesicle-mediated transport	0.000858753	0.0030493	Reactome	R-HSA-5653656	SERPINA1; HPX; F5; HP; CD55; CD163; SSC5D; MASP1; SAA1; APOA1; FTL; APOE; COL1A2; WASL; TF; COL3A1; MSR1; TBC1D10B; APOL1; VPS54	6288; 7018; 26000; 4481; 1278; 51542; 2153; 335; 9332; 5648; 3240; 1604; 1281; 3263; 348; 8976; 8542; 2512; 5265; 284297	620	620
Beta oxidation of hexanoyl-CoA to butanoyl-CoA	1.10374e-05	0.000200019	Reactome	R-HSA-77350	HADHB; ECHS1; ACADS; HADHA; HADH	1892; 35; 3030; 3032; 3033	5	5			Senescence and Autophagy in Cancer	0.000980175	0.00345121	Wikipathways	WP615	SQSTM1; FN1; CD44; VTN; IGFBP3; COL3A1; SERPINE1	3486; 7448; 8878; 960; 5054; 1281; 2335	106	106
Beta oxidation of lauroyl-CoA to decanoyl-CoA-CoA	1.10374e-05	0.000200019	Reactome	R-HSA-77310	HADHB; ECHS1; HADHA; ACADL; HADH	1892; 3030; 33; 3032; 3033	5	5			Warfarin Pathway, Pharmacodynamics	0.00102547	0.00358061	PharmGKB	PA145011114	F2; F10; F7	2147; 2155; 2159	14	14
Beta oxidation of octanoyl-CoA to hexanoyl-CoA	1.10374e-05	0.000200019	Reactome	R-HSA-77348	HADHB; ECHS1; HADHA; ACADM; HADH	1892; 3030; 3032; 34; 3033	5	5			Alternative complement activation	0.00127819	0.00442612	Reactome	R-HSA-173736	C3; CFB	718; 629	4	4
Synthesis and Degradation of Ketone Bodies	1.10374e-05	0.000200019	Wikipathways	WP311	HMGCL; ACAT1; HMGCS2; OXCT1; BDH1	5019; 38; 3155; 3158; 622	5	5			TGF-beta signaling pathway - Homo sapiens (human)	0.00160078	0.00549775	KEGG	path:hsa04350	DCN; TGFB2; LTBP1; INHBC; INHBE; FMOD	7042; 2331; 3626; 4052; 1634; 83729	85	85
Propionyl-CoA catabolism	1.10374e-05	0.000200019	Reactome	R-HSA-71032	PCCB; MUT; MCEE; PCCA; MMAA	84693; 5096; 5095; 4594; 166785	5	5			Signaling by BRAF and RAF fusions	0.00162511	0.00553596	Reactome	R-HSA-6802952	ITGA2B; FGG; FN1; FGA; FGB	2266; 3674; 2244; 2243; 2335	58	58
Bile acid biosynthesis	1.16631e-05	0.000209653	EHMN	Bile acid biosynthesis	DBI; CYP7B1; ALDH9A1; ACOX2; EHHADH; ACOX1; ABCB11; ALDH2; CYP27A1; ACAA1; ADHFE1; ACOT8; ALDH7A1; ALDH1B1; SLC27A2; ACOT2; ACOT1	8309; 30; 501; 10005; 641371; 137872; 1622; 223; 1593; 11001; 10965; 9420; 8647; 217; 51; 1962; 219	53	53			Vitamin D Receptor Pathway	0.00165418	0.00558953	Wikipathways	WP2877	TGFB2; ORM1; ORM2; KNG1; CEACAM1; IGFBP3; LGALS9; ITGAM; CDKAL1	3486; 7042; 3827; 5004; 634; 3684; 3965; 5005; 54901	184	184
gluconeogenesis	1.39137e-05	0.000248109	HumanCyc	PWY66-399	PCK2; PCK1; FBP2; FBP1; PC; MDH2; MDH1; ALDOB; PGK2; GPI; PGK1	5091; 5232; 4191; 5230; 5106; 4190; 229; 8789; 2203; 2821; 5105	26	25			Fibrin Complement Receptor 3 Signaling Pathway	0.00188067	0.00630401	Wikipathways	WP4136	PLG; LBP; ITGAM; IRAK4	3929; 51135; 5340; 3684	36	36
Valproic Acid Pathway, Pharmacokinetics	1.46404e-05	0.000256956	PharmGKB	PA165964265	IVD; UGT2B7; ACSM3; ACSM5; ACSM2A; ACSM2B; ECH1; UGT1A9; ACADSB; UGT1A6	3712; 1891; 36; 54600; 54988; 54578; 6296; 7364; 123876; 348158	21	21			Classical antibody-mediated complement activation	0.00202619	0.00671767	Reactome	R-HSA-173623	CRP; C1QC; C1QB; C1QA; C1S; C1R	716; 715; 714; 1401; 713; 712	89	89
Mitochondrial tRNA aminoacylation	1.46404e-05	0.000256956	Reactome	R-HSA-379726	SARS2; IARS2; EARS2; PARS2; MARS2; VARS2; DARS2; RARS2; AARS2; LARS2	57038; 55157; 54938; 57505; 23395; 124454; 55699; 25973; 57176; 92935	21	21			Oncogenic MAPK signaling	0.00203614	0.00671767	Reactome	R-HSA-6802957	ITGA2B; FGG; FN1; FGA; FGB	2266; 3674; 2244; 2243; 2335	61	61
Cardiac muscle contraction - Homo sapiens (human)	2.40416e-05	0.000418166	KEGG	path:hsa04260	UQCRC2; FXYD2; ATP1A1; COX5B; COX7A2L; UQCRB; CYC1; ATP1B1; UQCR10; COX4I1; UQCRH; CACNG6; COX8A; UQCR11; COX6B1; COX7A2; UQCRC1; COX6A1; UQCRFS1; COX6C; COX5A	476; 1351; 1327; 1329; 1337; 1340; 1537; 1347; 9377; 1345; 7381; 7384; 7385; 7386; 9167; 7388; 10975; 29796; 486; 481; 59285	78	78			Validated transcriptional targets of AP1 family members Fra1 and Fra2	0.00208456	0.00682369	PID	fra_pathway	DCN; COL1A2; MMP2; MMP9	1634; 4318; 4313; 1278	37	37
Tryptophan metabolism	2.43883e-05	0.000418166	EHMN	Tryptophan metabolism	GSTZ1; ALDH2; MAOB; MAOA; ADHFE1; SLC22A2; ALDH7A1; ALDH1B1; ACMSD; GSTK1	501; 6582; 4128; 219; 4129; 373156; 137872; 2954; 217; 130013	22	22			Extrinsic Pathway of Fibrin Clot Formation	0.00210959	0.00685208	Reactome	R-HSA-140834	F10; F7	2159; 2155	5	5
Doxorubicin Pathway, Pharmacokinetics	2.43883e-05	0.000418166	PharmGKB	PA165292177	ABCG2; RALBP1; SOD1; CBR1; CBR3; NQO1; ABCB1; NDUFS3; NDUFS7; AKR1C3	374291; 10928; 1728; 8644; 9429; 873; 4722; 6647; 5243; 874	22	22			Beta5 beta6 beta7 and beta8 integrin cell surface interactions	0.00220098	0.00709393	PID	integrin5_pathway	FBN1; FN1; VTN	7448; 2200; 2335	18	18
Biotin transport and metabolism	2.60033e-05	0.000436076	Reactome	R-HSA-196780	PCCB; HLCS; PCCA; PDZD11; PC; MCCC2; MCCC1	5091; 56922; 5095; 3141; 51248; 5096; 64087	11	11			Endochondral Ossification	0.00234929	0.00751415	Wikipathways	WP474	FRZB; IGF2; TGFB2; COL2A1; MMP9	4318; 2487; 3481; 7042; 1280	63	63
Beta-oxidation of very long chain fatty acids	2.60033e-05	0.000436076	Reactome	R-HSA-390247	ACOX1; ECI2; ACAA1; ACOT8; ABCD1; DECR2; EHHADH	10005; 26063; 215; 51; 30; 1962; 10455	11	11			Pantothenate and CoA biosynthesis - Homo sapiens (human)	0.00258544	0.0081769	KEGG	path:hsa00770	VNN2; VNN1; BCAT1	586; 8875; 8876	19	19
ketogenesis	2.62154e-05	0.000436076	HumanCyc	PWY66-367	HMGCS1; HMGCS2; HMGCL; ACAT1; BDH2; BDH1	622; 3157; 38; 3155; 3158; 56898	8	8			Nuclear Receptors Meta-Pathway	0.00259553	0.0081769	Wikipathways	WP2882	SERPINA1; TGFB2; SQSTM1; SLC7A5; SLC2A3; APOA1; ANGPTL4; PLTP; APOC3; SRPX2; FTL; APOA2	6515; 336; 8140; 7042; 5265; 8878; 2512; 345; 335; 27286; 51129; 5360	316	316
Synthesis of Ketone Bodies	2.62154e-05	0.000436076	Reactome	R-HSA-77111	HMGCS2; ACSS3; ACAT1; HMGCL; BDH2; BDH1	622; 79611; 38; 3155; 3158; 56898	8	8			Microglia Pathogen Phagocytosis Pathway	0.00278697	0.00871447	Wikipathways	WP3937	C1QC; C1QB; C1QA; ITGAM	714; 713; 712; 3684	40	40
Phospholipid metabolism	2.98887e-05	0.000493495	Reactome	R-HSA-1483257	STARD10; HADHA; PI4KB; PIKFYVE; GPD1; PGS1; CHKB; LPIN2; LPIN3; PTEN; HADHB; PIK3CA; ARF1; DDHD2; PLEKHA6; FIG4; GDPD1; PIK3R2; MTMR9; PNPLA8; MTMR2; PIP4K2C; GPCPD1; PCYT1A; SLC44A3; MTMR12; MTMR10; MTM1; PCYT2; PI4K2B; PTPN13; OSBPL10; PLD1; INPP5F; PISD; PLEKHA5; AGPAT5; NDUFS3; AGPAT3; AGPAT2; GPD1L; STARD7	126969; 55300; 9663; 2819; 284161; 56894; 375; 4722; 114884; 23761; 5783; 54545; 64900; 55326; 23171; 23259; 56261; 3030; 9896; 22874; 54477; 10809; 5130; 1120; 54893; 200576; 10555; 3032; 5298; 9489; 22876; 66036; 56910; 5728; 5337; 5833; 4534; 5296; 50640; 8898; 5290; 79837	216	216			Syndecan interactions	0.00300887	0.00933863	Reactome	R-HSA-3000170	SDC2; TNC; VTN	7448; 6383; 3371	20	20
Tryptophan metabolism	3.04178e-05	0.000498539	Wikipathways	WP465	AOX1; HSD17B10; ACAT1; ECHS1; AFMID; OGDH; ALDH2; ACMSD; MAOB; ALDH9A1; CYP7B1; DDC; HADH; ALDH1A1; GCDH	216; 217; 2639; 316; 1892; 4129; 3028; 4967; 9420; 125061; 223; 1644; 38; 130013; 3033	46	46			Syndecan-2-mediated signaling events	0.00305308	0.00940618	PID	syndecan_2_pathway	SDC2; KNG1; MMP2; FN1	4313; 6383; 2335; 3827	41	41
Ascorbate and aldarate metabolism - Homo sapiens (human)	3.35567e-05	0.000545971	KEGG	path:hsa00053	UGT2B7; UGT2B4; UGT2A3; ALDH2; MIOX; UGT1A9; ALDH7A1; ALDH1B1; UGT1A6; RGN; ALDH9A1	9104; 55586; 54578; 79799; 7363; 7364; 54600; 217; 219; 223; 501	27	27			Fibronectin matrix formation	0.00313364	0.00951446	Reactome	R-HSA-1566977	CEACAM1; FN1	634; 2335	6	6
Pathways in clear cell renal cell carcinoma	3.68858e-05	0.000595786	Wikipathways	WP4018	MDH1; TSC2; TSC1; PKLR; MLST8; PFKM; PFKL; FASN; LDHD; PGK2; LDHB; PGK1; GPI; ALDOB; SHMT2; SHMT1; SDSL; PSPH; GRB10; CEP290; PTEN; KDR	6472; 6470; 3791; 3945; 2821; 5313; 7249; 7248; 80184; 4190; 197257; 64223; 2194; 2887; 5230; 5232; 113675; 229; 5213; 5211; 5728; 5723	86	86			platelet amyloid precursor protein pathway	0.00313364	0.00951446	BioCarta	plateletapppathway	PLG; SERPINE1	5054; 5340	6	6
Tyrosine metabolism	5.63286e-05	0.000893028	INOH	None	ADH6; ADH5; GSTZ1; MAOA; MAOB; FAH; ADHFE1; SDHA; HGD; SDHB; DDC; FH	6389; 128; 4129; 1644; 2184; 137872; 2271; 130; 2954; 4128; 6390; 3081	33	33			PPAR signaling pathway	0.00328377	0.00989855	Wikipathways	WP3942	ANGPTL4; PLTP; APOA1; APOA2; APOC3	335; 336; 51129; 345; 5360	68	68
Alanine and aspartate metabolism	5.6891e-05	0.000893028	Wikipathways	WP106	ASPA; GOT2; PC; ABAT; GPT; GOT1; ASS1	2875; 443; 18; 445; 5091; 2806; 2805	12	12			AGE-RAGE signaling pathway in diabetic complications - Homo sapiens (human)	0.00346145	0.0103596	KEGG	path:hsa04933	TGFB2; FN1; COL1A2; COL3A1; MMP2; SERPINE1	4313; 1281; 2335; 7042; 5054; 1278	99	99
Degradation of cysteine and homocysteine	5.6891e-05	0.000893028	Reactome	R-HSA-1614558	TXN2; MPST; GOT2; TST; CTH; SUOX; SLC25A10	25828; 1491; 6821; 7263; 1468; 2806; 4357	12	12			Visual phototransduction	0.0040115	0.0119207	Reactome	R-HSA-2187338	APOE; SDC2; APOM; APOC3; APOA1; APOA2	336; 345; 348; 55937; 335; 6383	102	102
Mitochondrial fatty acid synthesis and respiration	5.6891e-05	0.000893028	Wikipathways	WP4318	BCL2L1; PLD1; MFN2; MFN1; FIS1; MTFP1; OPA1	51024; 598; 5337; 55669; 51537; 4976; 9927	12	12			PPAR signaling pathway - Homo sapiens (human)	0.00472706	0.0139481	KEGG	path:hsa03320	ANGPTL4; PLTP; APOA1; APOA2; APOC3	5360; 335; 336; 345; 51129	74	74
Choline catabolism	6.06069e-05	0.000931674	Reactome	R-HSA-6798163	CHDH; SARDH; DMGDH; BHMT; ALDH7A1	501; 635; 29958; 55349; 1757	6	6			IL6-mediated signaling events	0.00502068	0.0147109	PID	il6_7pathway	LBP; CRP; FGG; TIMP1	1401; 7076; 2266; 3929	47	47
threonine degradation	6.06069e-05	0.000931674	HumanCyc	PWY66-428	SDSL; DLD; BCKDHB; DBT; BCKDHA	593; 594; 1738; 113675; 1629	6	6			IL1 and megakaryocytes in obesity	0.00511556	0.0148849	Wikipathways	WP2865	F2; TIMP1; MMP9	7076; 4318; 2147	24	24
Beta oxidation of decanoyl-CoA to octanoyl-CoA-CoA	6.06069e-05	0.000931674	Reactome	R-HSA-77346	HADHB; HADH; HADHA; ACADM; ECHS1	3032; 3033; 1892; 3030; 34	6	6			Alpha9 beta1 integrin signaling events	0.00575063	0.0166173	PID	integrin_a9b1_pathway	F13A1; TNC; FN1	2335; 2162; 3371	25	25
Synthesis of PIPs at the early endosome membrane	7.03564e-05	0.00107414	Reactome	R-HSA-1660516	MTMR12; INPP5F; MTMR10; MTM1; PIKFYVE; FIG4; PI4K2B; MTMR2	200576; 54893; 55300; 54545; 22876; 9896; 4534; 8898	16	16			Malaria - Homo sapiens (human)	0.00582934	0.0167294	KEGG	path:hsa05144	SDC2; TGFB2; THBS2; THBS3	7042; 7058; 7059; 6383	49	49
Glycine, serine, alanine and threonine metabolism	7.93409e-05	0.00120307	EHMN	Glycine, serine, alanine and threonine metabolism	SARS2; PIPOX; GATM; DLD; SLC3A2; GLOD4; GLDC; CKB; SLC16A7; AMT; SLC22A5; PDPR; SARDH; GLYAT; DMGDH; CHDH; LDHD; SLC6A12; AARS2; HAO2	1152; 55066; 57505; 6584; 1738; 51179; 1757; 6520; 51031; 9194; 6539; 29958; 54938; 51268; 275; 2731; 55349; 2628; 10249; 197257	78	78			Angiopoietin receptor Tie2-mediated signaling	0.00626438	0.0178556	PID	angiopoietinreceptor_pathway	PLG; F2; MMP2; FN1	2147; 5340; 4313; 2335	50	50
Metabolism of carbohydrates	9.42599e-05	0.00141963	Reactome	R-HSA-71387	PCK2; PPP2R1B; AGL; MAN2B2; MDH1; GNPDA2; DCXR; GNPDA1; IDS; RBKS; PCK1; MDH2; FBP2; SLC25A13; ALDH1A1; SLC25A11; SLC25A10; PAPSS1; PKLR; NDC1; PHKB; PC; PFKM; PFKL; GOT2; GOT1; PGK2; PYGM; PGK1; GALT; MAN2C1; GPI; SHPK; CRYL1; NAGLU; SORD; GLCE; ALDOB; ARSB; SLC25A12; PFKFB2; GLB1; KHK; SLC35B3; GLB1L; XYLB; FBP1	5091; 216; 2592; 5313; 8402; 6652; 5519; 178; 23324; 4669; 8789; 51000; 4123; 5257; 5208; 2821; 4191; 5230; 132789; 5106; 9061; 411; 79411; 5105; 5232; 5211; 23729; 2806; 51181; 26035; 64080; 5837; 1468; 5213; 2805; 55706; 3795; 2720; 3423; 9942; 10165; 8604; 10007; 2203; 4190; 51084; 229	264	263			A tetrasaccharide linker sequence is required for GAG synthesis	0.00643086	0.0179635	Reactome	R-HSA-1971475	DCN; SDC2; VCAN	1462; 6383; 1634	26	26
FOXA2 and FOXA3 transcription factor networks	9.95554e-05	0.00148932	PID	hnf3bpathway	CPT1A; HMGCS1; ACADVL; PKLR; ALDOB; HNF4A; SLC2A2; PCK1; HNF1A; NF1; HADH; ACADM; CHKB; BDH1	3157; 37; 4763; 5313; 622; 6927; 6514; 1374; 34; 1120; 3033; 3172; 229; 5105	45	45			Endogenous TLR signaling	0.00643086	0.0179635	PID	toll_endogenous_pathway	VCAN; SAA1; IRAK4	51135; 1462; 6288	26	26
Mitochondrial ABC transporters	0.000108363	0.00155833	Reactome	R-HSA-1369007	ABCB8; ABCB10; ABCB7; ABCB6	22; 23456; 10058; 11194	4	4			TLR ECSIT MEKK1 JNK	0.00643086	0.0179635	INOH	None	LBP; IRAK4; IL1RAP	51135; 3556; 3929	26	26
Glycine degradation	0.000108363	0.00155833	Reactome	R-HSA-6783984	GLDC; DLD; AMT; GCSH	275; 2653; 1738; 2731	4	4			Toll-Like Receptors Cascades	0.00791509	0.0218593	Reactome	R-HSA-168898	LBP; SAA1; IRAK4; FGG; FGA; FGB; ITGAM	51135; 6288; 2244; 3684; 3929; 2266; 2243	154	154
2-oxoisovalerate decarboxylation to isobutanoyl-CoA	0.000108363	0.00155833	HumanCyc	PWY-5046	BCKDHA; BCKDHB; DBT; DLD	1629; 594; 1738; 593	4	4			Keratan sulfate biosynthesis	0.00792987	0.0218593	Reactome	R-HSA-2022854	PRELP; LUM; FMOD	4060; 5549; 2331	28	28
Carnitine synthesis	0.000108363	0.00155833	Reactome	R-HSA-71262	TMLHE; ALDH9A1; SHMT1; BBOX1	6470; 8424; 223; 55217	4	4			Heparan sulfate/heparin (HS-GAG) metabolism	0.00821912	0.0225086	Reactome	R-HSA-1638091	DCN; NDST1; SDC2; VCAN	1462; 1634; 6383; 3340	54	54
4-hydroxyproline degradation	0.000108363	0.00155833	HumanCyc	HYDROXYPRODEG-PWY	GOT2; HOGA1; PRODH2; ALDH4A1	8659; 2806; 58510; 112817	4	4			BMAL1-CLOCK,NPAS2 activates circadian gene expression	0.00904191	0.0244423	Wikipathways	WP3355	SERPINE1; F7	2155; 5054	10	10
propionyl-CoA degradation	0.000108363	0.00155833	HumanCyc	PROPIONMET-PWY	PCCB; MUT; MCEE; PCCA	84693; 5096; 5095; 4594	4	4			Steroid Biosynthesis	0.00904191	0.0244423	Wikipathways	WP496	F13B; CPN1	2165; 1369	10	10
Methionine De Novo and Salvage Pathway	0.000110582	0.00158004	Wikipathways	WP3580	ADI1; MAT2A; BHMT; MAT2B; SMS; MSRB2; MRI1; CHDH; MSRA	55256; 84245; 55349; 4144; 6611; 22921; 4482; 27430; 635	21	21			Platelet activation - Homo sapiens (human)	0.00982952	0.0264011	KEGG	path:hsa04611	ITGA2B; COL1A2; COL3A1; FGG; FGA; FGB	3674; 2243; 2244; 2266; 1278; 1281	123	123
Mitochondrial iron-sulfur cluster biogenesis	0.000112385	0.00158548	Reactome	R-HSA-1362409	ISCU; ISCA1; GLRX5; NFS1; FXN; LYRM4; FDXR	2395; 2232; 51218; 81689; 9054; 57128; 23479	13	13
Valproic acid pathway	0.000112385	0.00158548	Wikipathways	WP3871	IVD; HSD17B10; ABAT; HADHB; HADHA; ACADSB; EHHADH	3030; 3712; 18; 3028; 36; 1962; 3032	13	13
Inositol phosphate metabolism - Homo sapiens (human)	0.000116482	0.00163295	KEGG	path:hsa00562	ALDH6A1; INPP5A; PLCB3; PI4KB; INPP5F; PIKFYVE; PTEN; PIK3CA; PLCD1; IMPA2; PLCG1; IMPA1; ITPKC; MIOX; PI4K2B; MTM1; FIG4; MTMR2; PIP4K2C	200576; 55300; 80271; 3612; 3613; 55586; 5290; 3632; 5298; 4534; 8898; 5333; 5335; 22876; 79837; 5728; 9896; 5331; 4329	74	74
Metabolism of nucleotides	0.000117416	0.00163575	Reactome	R-HSA-15869	GSR; AGXT2; UPB1; NUDT18; AK2; TXN; LHPP; NT5C; DPYS; ADAL; GMPR2; PFAS; NUDT9; ENTPD5; NUDT15; ADSSL1; GMPR; AK9; NME3; PNP; DNPH1; GDA; DGUOK; DHODH	51292; 55270; 10591; 4832; 9615; 7295; 122622; 1807; 2766; 53343; 957; 30833; 5198; 2936; 4860; 64077; 1716; 204; 221264; 1723; 51733; 161823; 64902; 79873	105	105
Pathway_PA165964473	0.000121015	0.00166508	PharmGKB	PA165964473	OGDH; SUCLA2; SUCLG2; SUCLG1; ABAT; GOT2; ALDH5A1; GOT1	8801; 8802; 4967; 7915; 18; 8803; 2805; 2806	17	17
Valproic Acid Pathway, Pharmacodynamics	0.000121015	0.00166508	PharmGKB	PA165959313	OGDH; SUCLA2; SUCLG2; SUCLG1; ABAT; GOT2; ALDH5A1; GOT1	8801; 8802; 8803; 4967; 7915; 18; 2805; 2806	17	17
Folate biosynthesis - Homo sapiens (human)	0.000136685	0.00186914	KEGG	path:hsa00790	PCBD2; QDPR; SPR; PCBD1; CBR1; ALPL; GPHN; PTS; GGH; AKR1C3	10243; 8836; 84105; 6697; 5805; 8644; 5092; 5860; 873; 249	26	26
Folate metabolism	0.000148311	0.00200822	INOH	None	PKLR; NME3; NUDT2; QDPR; ALDH1L1; SHMT2; AMT; FTCD; PTS; SPR; SHMT1	5805; 6470; 10840; 10841; 6697; 5313; 318; 275; 6472; 4832; 5860	31	31
Tyrosine metabolism - Homo sapiens (human)	0.000148657	0.00200822	KEGG	path:hsa00350	AOX1; ADH6; ADH5; FAHD1; GSTZ1; MAOA; MAOB; FAH; DDC; HGD; GOT1; GOT2	128; 130; 2184; 3081; 316; 2954; 4128; 4129; 81889; 1644; 2805; 2806	36	36
Drug metabolism - cytochrome P450 - Homo sapiens (human)	0.000171148	0.00229813	KEGG	path:hsa00982	AOX1; UGT2B4; FMO1; ADH6; FMO4; UGT2B7; UGT2A3; GSTM4; MAOA; GSTA1; MGST3; GSTP1; ADH5; GSTA3; UGT1A9; UGT1A6; MAOB; GSTK1	128; 2948; 2950; 130; 2326; 2329; 4128; 4259; 373156; 54578; 79799; 316; 7363; 7364; 4129; 54600; 2938; 2940	72	70
Organelle biogenesis and maintenance	0.000173449	0.00231508	Reactome	R-HSA-1852241	HDAC6; ATP5S; PCM1; ARL3; PRKAG2; PRKAA2; CYCS; GLUD2; PRKAR2B; DCTN3; CEP290; CEP97; B9D1; IFT140; TTC30A; KIF3B; TFB2M; RAB3IP; RAB11A; PRKAG1; IFT122; DYNC2LI1; SIRT3; TFAM; SIRT5; IDH2; TFB1M; ARL6; DYNC2H1; RAB11FIP3; EXOC6; BBS1; TUBB4B; BBS2; TTC21B; AKAP9; GLUD1; CEP135; WDR34; ACTR1A; LZTFL1; WDR19; HAUS4	582; 64216; 23408; 57728; 2746; 9662; 8766; 5577; 27109; 5571; 55764; 80184; 54536; 27077; 89891; 9742; 3418; 51422; 9727; 79659; 92104; 51626; 10142; 5108; 54205; 5563; 23410; 11258; 583; 54930; 10121; 2747; 79598; 84100; 7019; 10383; 10013; 54585; 403; 117177; 51106; 79809; 9371	240	240
Metformin Pathway, Pharmacodynamic	0.000205311	0.00272404	PharmGKB	PA165948566	NDUFAB1; NDUFV1; NDUFB4; NDUFA2; PRKAG1; PRKAG2; PRKAA2; NDUFS1; NDUFS4; NDUFA11; NDUFS6	5563; 5571; 4695; 51422; 4706; 4710; 4719; 4723; 4724; 4726; 126328	32	32
mTOR signaling pathway - Homo sapiens (human)	0.000235414	0.00310495	KEGG	path:hsa04150	ATP6V1D; ATP6V1A; HRAS; ATP6V1H; MIOS; RICTOR; TSC2; NPRL3; TSC1; FZD6; PIK3CA; MAPKAP1; WDR24; PIK3R2; ATP6V1B2; FLCN; IGF1R; PRKAA2; PDPK1; MLST8; RPS6KA1; SOS1; SLC3A2; GRB10; ATP6V1E1; WDR59; PTEN; BRAF; LAMTOR4; LAMTOR5	523; 526; 529; 79109; 6195; 7249; 5728; 8323; 5170; 673; 5290; 5296; 51382; 3265; 54468; 64223; 84219; 10542; 2887; 253260; 79726; 6520; 51606; 3480; 389541; 5563; 8131; 201163; 7248; 6654	151	150
Histidine degradation	0.000254497	0.0033369	INOH	None	ALDH2; HNMT; MAOB; MAOA; FTCD; ALDH9A1; ALDH7A1; ALDH1B1; ALDH1A1	501; 4129; 216; 10841; 4128; 223; 217; 219; 3176	23	23
Metapathway biotransformation Phase I and II	0.000259604	0.00338396	Wikipathways	WP702	GSS; GSR; SULT1C2; GSTM4; UGT2A3; GSTA1; GSTA3; MGST3; NAT8; UGT1A9; EPHX2; UGT1A6; AKR1C1; AKR1C3; NAA40; CYP4F11; CYP51A1; NAA30; HNMT; UGT2B7; UGT2B4; FMO1; FMO4; NAT1; AKR7A2; AKR7A3; CYP7B1; NAA50; GLYATL1; GSTZ1; CYP27A1; GSTP1; GLYAT; GPX4; GSTK1	373156; 2326; 2329; 54600; 57834; 4259; 7363; 7364; 2938; 2936; 2937; 1645; 22977; 92292; 79829; 80218; 8574; 10249; 1593; 2954; 9027; 2950; 3176; 6819; 2948; 79799; 2940; 9; 9420; 122830; 2879; 2053; 1595; 8644; 54578	186	186
Metabolism of cofactors	0.000312111	0.00404475	Reactome	R-HSA-8978934	SPR; PDSS2; COQ9; COQ5; COQ7; COQ6; PTS; GCHFR	2644; 10229; 5805; 84274; 57017; 57107; 51004; 6697	19	19
Metabolism of xenobiotics by cytochrome P450 - Homo sapiens (human)	0.000361324	0.00465544	KEGG	path:hsa00980	UGT2B7; UGT2B4; ADH6; ADH5; AKR7A2; UGT2A3; GSTM4; CBR1; CBR3; GSTA1; MGST3; GSTP1; UGT1A9; GSTA3; UGT1A6; AKR7A3; AKR1C1; GSTK1	2948; 2950; 128; 4259; 373156; 54578; 22977; 7364; 54600; 79799; 130; 873; 874; 1645; 2938; 2940; 8574; 7363	76	74
AMPK signaling pathway - Homo sapiens (human)	0.000398086	0.00509962	KEGG	path:hsa04152	PCK2; PPP2R1B; PCK1; PRKAG1; PRKAG2; PRKAA2; FBP1; FBP2; TSC2; TSC1; TBC1D1; PFKM; PFKL; FASN; PIK3R2; CPT1A; IGF1R; PPP2R3A; PPP2R2D; CCND1; PFKFB2; HNF4A; PIK3CA; PDPK1; PPP2R5C	3172; 55844; 5170; 3480; 7248; 7249; 595; 8789; 5208; 5211; 5213; 5527; 2194; 2203; 5290; 23216; 51422; 5296; 1374; 5519; 5523; 5563; 5571; 5105; 5106	120	120
Urea cycle and metabolism of amino groups	0.000473876	0.0059371	Wikipathways	WP497	GAMT; CKB; SMS; GLUD1; GATM; OAT; ASS1; ACY1	2593; 4942; 445; 1152; 6611; 95; 2628; 2746	20	20
ras signaling pathway	0.000473876	0.0059371	BioCarta	raspathway	BCL2L1; RALBP1; PLD1; SOS1; PIK3CA; HRAS; BAD; PDPK1	3265; 5170; 5337; 572; 6654; 10928; 5290; 598	20	20
Ubiquinol biosynthesis	0.000474115	0.0059371	Reactome	R-HSA-2142789	COQ5; COQ7; COQ6; COQ9; PDSS2	10229; 84274; 57017; 57107; 51004	8	8
Conjugation of salicylate with glycine	0.000474115	0.0059371	Reactome	R-HSA-177128	GLYAT; GLYATL1; ACSM5; ACSM2A; ACSM2B	92292; 54988; 123876; 348158; 10249	8	8
EGFR1	0.000493887	0.00602879	NetPath	Pathway_EGFR1	EFNB2; RALBP1; MAP4K5; SNX5; CBLB; HRAS; PPP2R3A; PRKAA2; GAB1; BAD; PKP4; PKP2; EPS8; ARHGAP5; DAB2; TYK2; RICTOR; PEBP1; DLG3; HSPE1; PTEN; PIK3CA; TOM1L2; CDK2; PDZD11; REPS2; PIK3R2; SLC12A7; LSR; ENSA; CDH1; LIMD1; BRAF; ERBB2; ERBB3; PTPRA; PTPN23; TRIM24; NCK2; MAP3K4; SLC25A6; HGS; APPL2; PRKCZ; PDPK1; ATP1A1; SDCBP; MAPK8; TJP2; RPS6KA1; PLD1; SOS1; GRB7; GRB10; VAV2; MYO6; PLCG1; PRKD1;…	10723; 10040; 5037; 5590; 22874; 9185; 7205; 5318; 27131; 2059; 7297; 868; 6195; 7410; 11183; 1017; 293; 2065; 3265; 51248; 2887; 2909; 2549; 5786; 1601; 54477; 5728; 253260; 5058; 673; 10318; 394; 5337; 6654; 1948; 51599; 8994; 5935; 5563; 3336; 1741; 4646; 572; 55198; 10458; 84632; 2029; 9414; 6386; 5523; 10928; 5290; 8502; 146691; 4216; 5587; 25930; 476; 2064; 2886; 5335; 9146; 5599; 56243; 99…	457	455
pyruvate decarboxylation to acetyl CoA	0.000497666	0.00602879	HumanCyc	PYRUVDEHYD-PWY	PDHA1; DLAT; PDHB; DLD	1737; 5160; 1738; 5162	5	5
Beta oxidation of butanoyl-CoA to acetyl-CoA	0.000497666	0.00602879	Reactome	R-HSA-77352	ECHS1; ACSM3; ACADS; HADH	1892; 35; 6296; 3033	5	5
malate-aspartate shuttle	0.000497666	0.00602879	HumanCyc	MALATE-ASPARTATE-SHUTTLE-PWY	GOT2; GOT1; MDH2; MDH1	4190; 2805; 2806; 4191	5	5
ketolysis	0.000497666	0.00602879	HumanCyc	PWY66-368	ACAT1; OXCT1; BDH2; BDH1	5019; 622; 38; 56898	5	5
Catabolism of glucuronate to xylulose-5-phosphate	0.000497666	0.00602879	Reactome	R-HSA-5661270	SORD; CRYL1; XYLB; DCXR	6652; 51084; 9942; 51181	5	5
IGF1 pathway	0.000528343	0.00633159	PID	igf1_pathway	IGF1R; SOS1; NCK2; GRB10; HRAS; BAD; PRKCZ; PIK3CA; PDPK1; PRKD1	5170; 3265; 8440; 5590; 3480; 5587; 2887; 6654; 5290; 572	30	30
Nicotinate and nicotinamide metabolism - Homo sapiens (human)	0.000528343	0.00633159	KEGG	path:hsa00760	AOX1; NNT; ASPDH; QPRT; PNP; NT5C; NMRK1; NUDT12; NMNAT3; NMNAT1	83594; 64802; 316; 54981; 23530; 23475; 30833; 554235; 4860; 349565	30	30
Phytanic acid peroxisomal oxidation	0.000568389	0.0067689	EHMN	Phytanic acid peroxisomal oxidation	ACSL1; ACOX2; ACOX1; ACAA1; SLC27A2; EHHADH; PHYH	8309; 11001; 2180; 51; 30; 5264; 1962	16	16
Signaling Pathways in Glioblastoma	0.000570907	0.0067689	Wikipathways	WP2261	ERBB2; BRAF; IGF1R; ERBB3; CCND1; PIK3CA; HRAS; CDK2; GAB1; PTEN; PLCG1; PRKCZ; PIK3R2; NF1; MAP2K4; PDPK1; TSC1; TSC2; MAP2K6	5170; 595; 5296; 5290; 4763; 5335; 7249; 5608; 5728; 2549; 7248; 1017; 3480; 3265; 6416; 5590; 673; 2064; 2065	83	83
Ethanol oxidation	0.000602207	0.00710222	Reactome	R-HSA-71384	ADH6; ADH5; ACSS1; ALDH2; ALDH1B1; ALDH1A1	84532; 128; 219; 216; 217; 130	12	12
Busulfan Pathway, Pharmacodynamics	0.000651783	0.00764644	PharmGKB	PA165374494	BCL2L1; BAG3; FMO1; FMO4; NAT1; XIAP; MLH1; GSTA1; GSTP1; GGT1; CTH	2950; 9; 2326; 2329; 9531; 4292; 331; 1491; 598; 2678; 2938	36	36
PI Metabolism	0.00066847	0.00780115	Reactome	R-HSA-1483255	PI4KB; INPP5F; PIKFYVE; PTEN; MTM1; ARF1; MTMR10; PLEKHA6; PLEKHA5; FIG4; GDPD1; PI4K2B; PIK3R2; MTMR9; PIK3CA; PTPN13; MTMR2; PIP4K2C; MTMR12	200576; 5298; 55300; 54545; 22876; 4534; 66036; 9896; 375; 22874; 54477; 5296; 5728; 284161; 5783; 54893; 5290; 79837; 8898	84	84
Arginine biosynthesis - Homo sapiens (human)	0.000697442	0.00805492	KEGG	path:hsa00220	GLS; GLUD2; GLUD1; GOT2; GPT; GOT1; ASS1; ACY1	2875; 2806; 95; 2805; 2744; 2746; 2747; 445	21	21
phosphoinositides and their downstream targets	0.000697442	0.00805492	BioCarta	ptdinspathway	ARF1; VAV2; PFKM; PLCG1; BAD; PRKCZ; PDPK1; PFKL	5170; 375; 7410; 5211; 572; 5590; 5213; 5335	21	21
Vitamin B9 (folate) metabolism	0.000733516	0.00837716	EHMN	Vitamin B9 (folate) metabolism	FTCD; SLC25A6; SLC25A5; SLC25A4; SLC25A12; SHMT2; SLC25A13; AMT; SHMT1	291; 6470; 293; 292; 10165; 275; 8604; 6472; 10841	26	26
PPAR Alpha Pathway	0.000733516	0.00837716	Wikipathways	WP2878	CPT1A; DBI; CCND1; CPT2; ACAA1; UGT1A9; FABP1; EHHADH; ACADM	595; 54600; 1962; 1376; 1374; 1622; 30; 34; 2168	26	26
tRNA modification in the nucleus and cytosol	0.000736619	0.00837716	Reactome	R-HSA-6782315	TRMT112; LAGE3; OSGEP; PUS7; THG1L; TRMT6; WDR4; TRMT11; METTL1; TRMT5; TP53RK; THADA	63892; 54517; 10785; 55644; 8270; 51605; 54974; 57570; 112858; 51504; 4234; 60487	42	42
Lysine metabolism	0.00080358	0.00909228	EHMN	Lysine metabolism	OGDH; OGDHL; PIPOX; AASS; DLST; SMYD3; ALDH2; SETD1A; GCDH; ALDH7A1; ALDH1B1; TMLHE; SHMT2; SHMT1; ALDH9A1	501; 2639; 6470; 4967; 217; 1743; 219; 10157; 223; 55217; 9739; 55753; 64754; 51268; 6472	60	60
Nucleobase catabolism	0.000843024	0.00949041	Reactome	R-HSA-8956319	NUDT9; ENTPD5; PNP; DNPH1; AGXT2; DPYS; GDA; NUDT15; UPB1; NUDT18; NT5C	51733; 55270; 10591; 4860; 53343; 1807; 64902; 957; 9615; 79873; 30833	37	37
Cyclophosphamide Pathway, Pharmacodynamics	0.00088155	0.00977599	PharmGKB	PA2035	ADH6; ADH5; ERCC1; ERCC4; ALDH2; ALDH5A1; ALDH1A1	128; 130; 7915; 2072; 2067; 216; 217	17	17
Selenocompound metabolism - Homo sapiens (human)	0.00088155	0.00977599	KEGG	path:hsa00450	PAPSS1; TXNRD2; SEPHS2; MARS2; SEPSECS; SCLY; CTH	9061; 1491; 22928; 51540; 92935; 10587; 51091	17	17
Mitochondrial biogenesis	0.00088155	0.00977599	Wikipathways	WP3331	SIRT3; TFAM; TFB2M; POLG2; CYCS; TFB1M; POLRMT	51106; 5442; 54205; 7019; 64216; 23410; 11232	17	17
UDP-<i>N</i>-acetyl-D-galactosamine biosynthesis II	0.00097699	0.010675	HumanCyc	PWY-5514	GNPDA2; GNPDA1; GNPNAT1; GPI; PGM3	10007; 2821; 132789; 64841; 5238	9	9
Conjugation of carboxylic acids	0.00097699	0.010675	Reactome	R-HSA-159424	GLYAT; GLYATL1; ACSM5; ACSM2A; ACSM2B	92292; 54988; 123876; 348158; 10249	9	9
Amino Acid conjugation	0.00097699	0.010675	Reactome	R-HSA-156587	GLYAT; GLYATL1; ACSM5; ACSM2A; ACSM2B	92292; 54988; 123876; 348158; 10249	9	9
glutathione-mediated detoxification	0.000998693	0.0107718	HumanCyc	PWY-4061	GSTM4; GSTZ1; GSTA1; GSTA3; MGST3; GSTP1; GGH; GSTK1	8836; 373156; 2940; 4259; 2950; 2954; 2948; 2938	22	22
Transcriptional activation of mitochondrial biogenesis	0.0010016	0.0107718	Reactome	R-HSA-2151201	SIRT3; TFAM; SIRT5; IDH2; TFB2M; GLUD2; GLUD1; CYCS; TFB1M	2747; 64216; 23408; 7019; 2746; 3418; 23410; 54205; 51106	27	27
Import of palmitoyl-CoA into the mitochondrial matrix	0.00102206	0.0107718	Reactome	R-HSA-200425	CPT1A; PRKAG2; CPT2; PRKAA2; SLC22A5; CHKB	1376; 5563; 6584; 1374; 51422; 1120	13	13
Phenylalanine and tyrosine catabolism	0.00102206	0.0107718	Reactome	R-HSA-71182	QDPR; PCBD1; GSTZ1; FAH; HGD; ASRGL1	5860; 5092; 2954; 80150; 2184; 3081	13	13
glycine cleavage	0.00106317	0.0107718	HumanCyc	GLYCLEAV-PWY	GLDC; AMT; DLD	275; 1738; 2731	3	3
Vpr-mediated induction of apoptosis by mitochondrial outer membrane permeabilization	0.00106317	0.0107718	Reactome	R-HSA-180897	SLC25A6; SLC25A5; SLC25A4	292; 291; 293	3	3
mitochondrial fatty acid beta-oxidation of unsaturated fatty acids	0.00106317	0.0107718	Reactome	R-HSA-77288	ECI1; DECR1; ACADM	1632; 34; 1666	3	3
fatty acid &beta;-oxidation (unsaturated, odd number)	0.00106317	0.0107718	HumanCyc	PWY-5137	ECI2; ECI1; EHHADH	1632; 10455; 1962	3	3
Beta oxidation of palmitoyl-CoA to myristoyl-CoA	0.00106317	0.0107718	Reactome	R-HSA-77305	ACADVL; HADHB; HADHA	3030; 37; 3032	3	3
Beta oxidation of myristoyl-CoA to lauroyl-CoA	0.00106317	0.0107718	Reactome	R-HSA-77285	HADHB; HADHA; ACADL	3030; 3032; 33	3	3
2-oxoglutarate decarboxylation to succinyl-CoA	0.00106317	0.0107718	HumanCyc	PWY-5084	DLST; OGDH; DLD	4967; 1738; 1743	3	3
Mitochondrial transcription initiation	0.00106317	0.0107718	Reactome	R-HSA-163282	POLRMT; TFB2M; TFAM	7019; 64216; 5442	3	3
L-carnitine biosynthesis	0.00106317	0.0107718	HumanCyc	PWY-6100	TMLHE; ALDH9A1; BBOX1	8424; 223; 55217	3	3
Proline catabolism	0.00106317	0.0107718	Reactome	R-HSA-70688	PRODH; PRODH2; ALDH4A1	8659; 58510; 5625	4	3
<i>N</i>-acetylglucosamine degradation I	0.00106317	0.0107718	HumanCyc	GLUAMCAT-PWY	GNPDA2; AMDHD2; GNPDA1	51005; 10007; 132789	3	3
Interconversion of 2-oxoglutarate and 2-hydroxyglutarate	0.00106317	0.0107718	Reactome	R-HSA-880009	D2HGDH; ADHFE1; L2HGDH	137872; 728294; 79944	3	3
Glutathione conjugation	0.00107848	0.0108775	Reactome	R-HSA-156590	GSS; GSTZ1; GSTM4; GSTA1; GSTA3; MGST3; GSTP1; GGT1; OPLAH; CNDP2; GSTK1	2948; 2678; 26873; 373156; 2940; 4259; 2950; 2937; 55748; 2954; 2938	39	38
ABC transporters - Homo sapiens (human)	0.0011594	0.0115888	KEGG	path:hsa02010	ABCG1; ABCG2; ABCC9; ABCB1; ABCB11; ABCB10; ABCB7; ABCA3; ABCD1; ABCB8; ABCD4; ABCB6	21; 22; 23456; 11194; 5826; 8647; 10058; 10060; 9429; 215; 9619; 5243	44	44
Galactose metabolism	0.0011594	0.0115888	EHMN	Galactose metabolism	SLC2A9; SLC2A8; GLB1L; SLC2A2; GLB1; SLC5A12; SLC5A1; SLC5A10; PFKL; SLC35B4; SLC35A3; PFKM	56606; 29988; 2720; 5211; 159963; 6523; 6514; 23443; 79411; 84912; 125206; 5213	44	44
Glutathione metabolism - Homo sapiens (human)	0.00118788	0.0118205	KEGG	path:hsa00480	GSS; NAT8; SMS; GSTM4; GSTA1; GSTA3; GSR; MGST3; GSTP1; GGT1; GPX4; IDH2; OPLAH; GSTK1	2948; 2950; 4259; 373156; 2879; 9027; 6611; 26873; 3418; 2678; 2936; 2937; 2938; 2940	56	56
Fructose and mannose metabolism - Homo sapiens (human)	0.00122475	0.0121332	KEGG	path:hsa00051	PFKFB2; MPI; SORD; KHK; PFKM; PFKL; FBP1; FBP2; ALDOB; ENOSF1	55556; 2203; 3795; 8789; 5208; 5211; 5213; 229; 6652; 4351	33	33
Lamivudine Pathway, Pharmacokinetics/Pharmacodynamics	0.00131629	0.0129824	PharmGKB	PA165860384	PCYT1A; ABCG2; NT5C; PCYT2; ABCB1; SLC22A2; PGK1	9429; 30833; 5833; 5230; 6582; 5243; 5130	18	18
insulin Mam	0.00132445	0.0130053	INOH	None	PPP2R1B; PRKAG2; TSC1; SOS1; PRKAG1; PIK3CA; HRAS; PPP2R3A; PRKAA2; MAPKAP1; PTEN; BAD; RICTOR; PIK3R2; PDPK1; MLST8; TSC2; PPP2R5C	5563; 5170; 3265; 5728; 79109; 64223; 572; 5519; 5571; 5523; 51422; 5296; 7249; 5527; 253260; 6654; 7248; 5290	82	82
One Carbon Metabolism	0.00134384	0.0131378	Wikipathways	WP241	MTFMT; BHMT; MAT2B; ALDH1L1; SHMT2; FTCD; MTRR; AMT; SHMT1	275; 27430; 4552; 6472; 6470; 635; 10840; 10841; 123263	28	28
mitochondrial L-carnitine shuttle	0.00137178	0.0132944	HumanCyc	PWY-6111	CPT1A; CRAT; CPT2; CHKB	1120; 1374; 1376; 1384	6	6
lysine degradation II (pipecolate pathway)	0.00137178	0.0132944	HumanCyc	PWY66-425	DHTKD1; CRYM; PIPOX; ALDH7A1	1428; 501; 55526; 51268	6	6
Pentose and glucuronate interconversions - Homo sapiens (human)	0.00157847	0.0152312	KEGG	path:hsa00040	UGT2B7; UGT2B4; CRYL1; DCXR; UGT2A3; SORD; UGT1A9; ISPD; UGT1A6; XYLB	51084; 729920; 54578; 79799; 7363; 7364; 54600; 9942; 51181; 6652	34	34
Methylation	0.00163487	0.0157075	Reactome	R-HSA-156581	TRMT112; MAT2A; MAT2B; N6AMT1; MTRR; AS3MT	4552; 4144; 57412; 51504; 29104; 27430	15	14
Endometrial cancer - Homo sapiens (human)	0.00171025	0.0163118	KEGG	path:hsa05213	ERBB2; SOS1; CCND1; PIK3CA; HRAS; MLH1; PTEN; BAD; BRAF; DDB2; CDH1; PDPK1; CTNNA2; PIK3R2	673; 5290; 5296; 5170; 572; 3265; 4292; 595; 1496; 5728; 2064; 999; 1643; 6654	58	58
Metabolism of polyamines	0.00171241	0.0163118	Reactome	R-HSA-351202	ADI1; GAMT; CKB; NMRAL1; SMS; NQO1; GATM; MRI1; SLC6A12; GOT1; ASS1	2805; 2593; 55256; 6611; 57407; 1152; 84245; 6539; 1728; 2628; 445	40	40
Abacavir transport and metabolism	0.00179	0.0169064	Reactome	R-HSA-2161522	ABCG2; PCK1; ADAL; ABCB1; SLC22A2	9429; 5243; 161823; 5105; 6582	10	10
putrescine degradation III	0.00179	0.0169064	HumanCyc	PWY-0	ALDH1B1; MAOB; SAT2; MAOA; ALDH2	112483; 4128; 4129; 219; 217	10	10
EGF-EGFR Signaling Pathway	0.00188533	0.0177317	Wikipathways	WP437	RALBP1; HRAS; GAB1; STXBP1; PLCG1; EPS8; IQSEC1; RICTOR; PEBP1; MAP3K4; REPS2; AP2M1; PIK3R2; NDUFA13; MAPK8; ERBB2; CBLB; NCK2; HGS; PRKCZ; RPS6KA1; PLD1; SOS1; GRB10; VAV2; PTEN; BRAF; PDPK1; PAK1	5170; 673; 5590; 5599; 6654; 6812; 51079; 2064; 9146; 2549; 4216; 3265; 253260; 5037; 5335; 5337; 2887; 2059; 7410; 868; 6195; 8440; 10928; 5296; 9185; 5058; 5728; 1173; 9922	162	162
Purine catabolism	0.00190207	0.0177959	Reactome	R-HSA-74259	NUDT9; PNP; NT5C; GDA; NUDT15; NUDT18; DNPH1	9615; 79873; 55270; 4860; 53343; 30833; 10591	19	19
Synthesis of bile acids and bile salts via 7alpha-hydroxycholesterol	0.00190813	0.0177959	Reactome	R-HSA-193368	CYP7B1; ACOX2; CYP27A1; ABCB11; ACOT8; SLC27A2; AKR1C1; AKR1C3	8309; 11001; 10005; 1593; 8644; 9420; 1645; 8647	24	24
Amino acid synthesis and interconversion (transamination)	0.00201063	0.0186737	Reactome	R-HSA-70614	ASPG; GLS; ASPA; PSPH; GLUD2; GLUD1; GOT2; OAT; GPT; GOT1	2805; 2747; 443; 374569; 4942; 2746; 5723; 2875; 2806; 2744	35	35
Mitochondrial biogenesis	0.00211708	0.0195808	Reactome	R-HSA-1592230	SIRT3; TFAM; SIRT5; ATP5S; IDH2; TFB2M; PRKAG2; GLUD2; CYCS; PRKAA2; PRKAG1; GLUD1; TFB1M	2747; 64216; 23408; 7019; 54205; 2746; 5563; 3418; 23410; 27109; 51106; 5571; 51422	53	53
Regulation of lipid metabolism by Peroxisome proliferator-activated receptor alpha (PPARalpha)	0.0021279	0.0195995	Wikipathways	WP2797	CPT1A; HMGCS1; HMGCS2; ACOX1; RGL1; ACSL1; CPT2; UGT1A9; FABP1; PLIN2; ACADM	54600; 1374; 1376; 23179; 2168; 123; 3158; 51; 34; 2180; 3157	41	41
Pentose phosphate pathway - Homo sapiens (human)	0.00230823	0.0209148	KEGG	path:hsa00030	GPI; PFKM; RBKS; PFKL; FBP1; FBP2; IDNK; ALDOB; RGN	2821; 8789; 9104; 2203; 64080; 5211; 5213; 229; 414328	30	30
Fatty acid elongation - Homo sapiens (human)	0.00230823	0.0209148	KEGG	path:hsa00062	HADH; THEM4; ECHS1; HADHB; HADHA; ACAA2; ELOVL7; ACOT2; ACOT1	3030; 117145; 10449; 10965; 3032; 3033; 641371; 1892; 79993	30	30
Fructose Mannose metabolism	0.00230823	0.0209148	INOH	None	PFKFB2; GPI; GNPDA1; MPI; SORD; KHK; FBP1; FBP2; ALDOB	5208; 3795; 10007; 229; 6652; 4351; 8789; 2821; 2203	30	30
PI3K-AKT-mTOR signaling pathway and therapeutic opportunities	0.00230823	0.0209148	Wikipathways	WP3844	TFEB; PIK3CA; HRAS; PTEN; BAD; PIK3R2; GRB10; RICTOR; TSC2	5296; 572; 5290; 5728; 2887; 7249; 7942; 253260; 3265	30	30
Methionine Cysteine metabolism	0.0025581	0.0230851	INOH	None	MAT2A; BHMT; MAT2B; MPST; GOT2; GOT1; CTH; LDHB	2805; 1491; 635; 4144; 2806; 3945; 27430; 4357	25	25
Ceramide signaling pathway	0.00261099	0.023374	PID	ceramide_pathway	MADD; ASAH1; MAP2K4; CTSD; TRAF2; CYCS; BAD; PRKCZ; SMPD1; FADD; MAPK8; AIFM1	427; 6416; 5590; 8567; 8772; 1509; 6609; 9131; 54205; 7186; 5599; 572	48	48
tRNA Aminoacylation	0.00262158	0.023374	Reactome	R-HSA-379724	SARS2; IARS2; EARS2; PARS2; MARS2; VARS2; DARS2; RARS2; AARS2; LARS2; EEF1E1	23395; 54938; 57505; 57176; 25973; 57038; 92935; 9521; 55699; 55157; 124454	42	42
Porphyrin and chlorophyll metabolism - Homo sapiens (human)	0.00262158	0.023374	KEGG	path:hsa00860	HMBS; UGT2B7; UGT2B4; EARS2; UGT2A3; PPOX; FXN; UGT1A9; UGT1A6; COX15; FECH	124454; 54600; 54578; 79799; 2235; 7363; 7364; 3145; 1355; 2395; 5498	42	42
One carbon pool by folate - Homo sapiens (human)	0.00267109	0.0237206	KEGG	path:hsa00670	MTFMT; ALDH1L2; ALDH1L1; AMT; FTCD; SHMT2; SHMT1	6470; 6472; 160428; 275; 10840; 10841; 123263	20	20
Fructose metabolism	0.00294192	0.0258171	Reactome	R-HSA-5652084	SORD; KHK; ALDH1A1; ALDOB	216; 3795; 229; 6652	7	7
Arachidonate Epoxygenase - Epoxide Hydrolase	0.00294192	0.0258171	Wikipathways	WP678	GSTP1; EPHX2; COX5A; COX8A	2053; 1351; 9377; 2950	7	7
ubiquinol-10 biosynthesis	0.00294192	0.0258171	HumanCyc	PWY-5872	COQ5; COQ7; COQ6; PDSS2	10229; 84274; 57107; 51004	7	7
Trans-sulfuration and one carbon metabolism	0.00296233	0.0258942	Wikipathways	WP2525	GSS; MAT2A; BHMT; PSPH; MAT2B; SHMT2; CTH; AMT; SHMT1	275; 27430; 6472; 6470; 5723; 635; 2937; 1491; 4144	31	31
Signaling by FGFR4 in disease	0.00300704	0.0260208	Reactome	R-HSA-5655291	PIK3CA; HRAS; PLCG1; SOS1; GAB1	2549; 3265; 6654; 5290; 5335	11	11
Synthesis of PIPs at the late endosome membrane	0.00300704	0.0260208	Reactome	R-HSA-1660517	MTM1; FIG4; MTMR2; MTMR9; PIKFYVE	66036; 200576; 9896; 4534; 8898	11	11
Lysosome - Homo sapiens (human)	0.00301182	0.0260208	KEGG	path:hsa04142	IDS; SMPD1; AP1S1; AP1S3; CTSD; ASAH1; AP4S1; NPC2; CTSH; TPP1; NAGLU; GALNS; CTSF; ATP6V1H; GGA1; GGA3; LAMP2; ARSB; LGMN; SLC17A5; GLB1; ATP6V0A1; ATP6V0A2	5641; 8722; 535; 2588; 4669; 23163; 2720; 1200; 130340; 3920; 10577; 3423; 26088; 1174; 26503; 11154; 51606; 411; 427; 6609; 1509; 1512; 23545	123	123
superpathway of tryptophan utilization	0.00320369	0.0274655	HumanCyc	PWY66-401	QPRT; ADH6; AFMID; ALDH2; DHTKD1; MAOB; MAOA; DDC; NMNAT3; NMNAT1; ACMSD	4129; 1644; 55526; 349565; 130; 4128; 217; 23475; 125061; 130013; 64802	45	43
Hedgehog ,off, state	0.00320369	0.0274655	Reactome	R-HSA-5610787	ADCY5; ADCY6; CSNK1A1; TTC21B; ADCY9; UBA52; PRKAR2B; NUMB; IFT122; IFT140; WDR19	55764; 57728; 112; 8650; 111; 79809; 115; 5577; 7311; 1452; 9742	44	43
Angiopoietin Like Protein 8 Regulatory Pathway	0.00326819	0.0279111	Wikipathways	WP3915	PCK1; MAP4K5; PRKAG1; HRAS; PRKAG2; PRKAA2; FBP1; MAP2K4; RICTOR; TSC2; TSC1; PIK3CA; MAP3K4; MAPKAP1; FASN; PIK3R2; MAPK8; CBLB; MLST8; RPS6KA1; RPS6KA4; SOS1; PDPK1; MAP2K6	5170; 7248; 11183; 5599; 6654; 8986; 5608; 6195; 7249; 4216; 3265; 51422; 253260; 64223; 2194; 79109; 2203; 5563; 5105; 868; 5296; 5290; 5571; 6416	131	131
Purine metabolism	0.00344268	0.0292891	EHMN	Purine metabolism	ATP6V1A; POLR3F; PNPT1; POLG2; POLG; SLC5A1; POLR1B; POLR1D; POLR3A; SLC25A13; SLC25A12; SLC25A10; MTPAP; POLR2I; NT5C; SLC28A1; ATP6V1B2; ENTPD5; ATP6V0A2; AK2; ATP1B1; POLR2B; ATP2B2; DYNC2H1; ADCY5; AK3; GFM1; GFM2; ATP6V1E1; ADCY9; ATP6V0A1; ATP1A1; DGUOK; POLRMT; SLC1A1; TUFM	23545; 529; 111; 79659; 50808; 523; 6505; 9154; 526; 30833; 476; 7284; 10621; 481; 1468; 957; 535; 5428; 85476; 8604; 491; 11128; 5438; 51082; 1716; 11232; 84172; 5431; 5442; 87178; 115; 84340; 10165; 6523; 204; 55149	223	222
Omega-3 fatty acid metabolism	0.00364476	0.0308844	EHMN	Omega-3 fatty acid metabolism	ACSL1; ACOX2; ACOX1; ACAA1; EHHADH; SLC27A2	8309; 11001; 2180; 51; 30; 1962	16	16
Fructose and mannose metabolism	0.00365791	0.0308844	EHMN	Fructose and mannose metabolism	SLC2A9; SLC2A8; SLC2A2; SLC5A12; SLC5A1; SLC5A10; ALDOB	159963; 6514; 6523; 56606; 229; 125206; 29988	21	21
Vibrio cholerae infection - Homo sapiens (human)	0.00375872	0.0316158	KEGG	path:hsa05110	TJP2; ATP6V1D; ATP6V1A; ARF1; ATP6V1E1; ATP6V1H; ADCY9; PLCG1; ATP6V0A1; ATP6V0A2; SLC12A2; ATP6V1B2	51606; 523; 526; 529; 535; 6558; 51382; 9414; 5335; 115; 375; 23545	50	50
adenosine ribonucleotides <i>de novo</i> biosynthesis	0.00390243	0.0317195	HumanCyc	PWY-7219	ATP6V1D; ATP6V1A; AK3; AK2; ATP6V1E1; ATP6V1H; ATP5S; ATP6V0A1; ATP6V1B2; ADSSL1	529; 51382; 50808; 523; 27109; 535; 526; 204; 122622; 51606	38	38
tRNA charging	0.00390243	0.0317195	HumanCyc	TRNA-CHARGING-PWY	SARS2; IARS2; EARS2; PARS2; MARS2; VARS2; DARS2; RARS2; AARS2; LARS2	54938; 57505; 57176; 25973; 57038; 92935; 55699; 55157; 23395; 124454	38	38
glutaryl-CoA degradation	0.00392759	0.0317195	HumanCyc	PWY-5177	ECHS1; GCDH; ACAT1	1892; 38; 2639	4	4
Malate-aspartate shuttle	0.00392759	0.0317195	Wikipathways	WP4315	GOT2; MDH1; SLC25A11	2806; 8402; 4190	4	4
Polyol Pathway	0.00392759	0.0317195	Wikipathways	WP690	SORD; KHK; ALDOB	3795; 229; 6652	4	4
Utilization of Ketone Bodies	0.00392759	0.0317195	Reactome	R-HSA-77108	ACAT1; OXCT1; BDH1	5019; 622; 38	4	4
phenylalanine degradation/tyrosine biosynthesis	0.00392759	0.0317195	HumanCyc	PHENYLALANINE-DEG1-PWY	PCBD2; QDPR; PCBD1	5092; 5860; 84105	4	4
Transcription from mitochondrial promoters	0.00392759	0.0317195	Reactome	R-HSA-75944	POLRMT; TFB2M; TFAM	7019; 64216; 5442	4	4
lysine degradation I (saccharopine pathway)	0.00392759	0.0317195	HumanCyc	LYSINE-DEG1-PWY	AASS; DHTKD1; ALDH7A1	10157; 501; 55526	4	4
molybdenum cofactor biosynthesis	0.00392759	0.0317195	HumanCyc	PWY-6823	NFS1; MOCS3; GPHN	10243; 9054; 27304	4	4
<i>N</i>-acetylglucosamine degradation II	0.00392759	0.0317195	HumanCyc	PWY-6517	GNPDA2; AMDHD2; GNPDA1	51005; 10007; 132789	4	4
Collecting duct acid secretion - Homo sapiens (human)	0.00436585	0.0351317	KEGG	path:hsa04966	ATP6V1D; ATP6V1A; CA2; ATP6V1E1; SLC12A7; ATP6V0A1; ATP6V0A2; ATP6V1B2	523; 526; 529; 535; 51382; 10723; 760; 23545	27	27
Neurotransmitter release cycle	0.00446822	0.0358261	Reactome	R-HSA-112310	LIN7A; STX1A; LIN7C; ABAT; STXBP1; MAOA; UNC13B; SLC22A2; SLC6A12; ALDH5A1; GLS; SLC1A1	8825; 7915; 6582; 4128; 6539; 6804; 6812; 6505; 10497; 2744; 18; 55327	51	51
ceramide signaling pathway	0.00470288	0.0375725	BioCarta	ceramidepathway	MADD; MAP2K4; TRAF2; CYCS; BAD; SMPD1; FADD; MAPK8; AIFM1	6416; 8567; 8772; 6609; 9131; 54205; 7186; 5599; 572	33	33
Bile secretion - Homo sapiens (human)	0.00475159	0.037826	KEGG	path:hsa04976	ADCY5; UGT2B4; FXYD2; ADCY6; SLC4A4; CA2; SCARB1; AQP1; ADCY9; ATP1B1; SLC5A1; ABCB11; ATP1A1; ABCG2; ABCB1	115; 111; 476; 949; 6523; 7363; 8647; 112; 9429; 8671; 481; 358; 486; 760; 5243	71	71
insulin	0.00489805	0.0384832	INOH	None	PPP2R1B; PRKAG2; SOS1; PRKAG1; PIK3CA; HRAS; PPP2R3A; PRKAA2; PPP2R5C; PTEN; BAD; PIK3R2; PDPK1; MLST8; TSC2; TSC1	3265; 5728; 64223; 5563; 7248; 5519; 5571; 5523; 51422; 5296; 5170; 7249; 5527; 6654; 5290; 572	78	78
CD28 dependent PI3K/Akt signaling	0.00489888	0.0384832	Reactome	R-HSA-389357	THEM4; PIK3CA; MAPKAP1; RICTOR; PIK3R2; PDPK1; MLST8	5170; 117145; 64223; 5296; 253260; 79109; 5290	22	22
Nef-mediates down modulation of cell surface receptors by recruiting them to clathrin adapters	0.00489888	0.0384832	Reactome	R-HSA-164938	ARF1; ATP6V1H; AP2M1; B2M; AP1S1; AP1S3; PACS1	130340; 1173; 51606; 375; 55690; 1174; 567	22	22
ErbB1 downstream signaling	0.0049032	0.0384832	PID	erbb1_downstream_pathway	BCL2L1; PEBP1; RICTOR; RPS6KA4; PLD1; SOS1; VAV2; PIK3CA; HRAS; MAP2K4; GAB1; MAPKAP1; BAD; PRKCZ; BRAF; EPS8; PDPK1; BAIAP2; MAPK8; MLST8	8986; 3265; 64223; 2059; 598; 79109; 2549; 5037; 5590; 253260; 572; 673; 5599; 10458; 5170; 5337; 6654; 6416; 7410; 5290	107	106
Purine metabolism - Homo sapiens (human)	0.00506314	0.039599	KEGG	path:hsa00230	FHIT; PNPT1; POLR3F; POLR1B; POLR1D; POLR3A; PAPSS1; PKLR; NT5C; GMPR2; NUDT2; PFAS; NUDT9; ENTPD5; ENPP4; DGUOK; ADCY6; POLR2B; ADSSL1; POLR2I; GMPR; ADCY5; AK9; NME3; AK3; PNP; ADCY9; GDA; AK2	22875; 5198; 221264; 51292; 53343; 111; 112; 30833; 115; 2272; 1716; 5313; 204; 84172; 2766; 50808; 87178; 4832; 4860; 122622; 5431; 5438; 9061; 318; 11128; 10621; 51082; 9615; 957	174	173
the igf-1 receptor and longevity	0.00515197	0.040013	BioCarta	longevitypathway	IGF1R; SOS1; SOD1; PIK3CA; HRAS; PDPK1	3265; 5170; 3480; 6654; 5290; 6647	17	17
Phenylalanine metabolism - Homo sapiens (human)	0.00515197	0.040013	KEGG	path:hsa00360	GOT2; MAOB; MAOA; GLYAT; DDC; GOT1	4128; 4129; 10249; 1644; 2805; 2806	17	17
GABA shunt	0.00540973	0.0415803	HumanCyc	GLUDEG-I-PWY	ALDH5A1; GLUD2; GLUD1; ABAT	2746; 2747; 18; 7915	8	8
palmitate biosynthesis	0.00540973	0.0415803	HumanCyc	PWY-5994	ACOT2; FASN; ACOT8; ACOT1	10005; 641371; 2194; 10965	9	8
Sulfur relay system - Homo sapiens (human)	0.00540973	0.0415803	KEGG	path:hsa04122	MOCS3; NFS1; TST; MPST	27304; 7263; 9054; 4357	8	8
Prostaglandin formation from arachidonate	0.00582767	0.0446387	EHMN	Prostaglandin formation from arachidonate	CBR1; DHRS4; GSTZ1; CBR3; MGST3; SLCO2A1; SLC22A2; PTGES2; GSTK1	4259; 6578; 6582; 10901; 373156; 874; 2954; 873; 80142	34	34
Insulin signaling pathway - Homo sapiens (human)	0.00587133	0.0448192	KEGG	path:hsa04910	PCK2; PCK1; PRKAG1; HRAS; PRKAG2; PRKAA2; BAD; PRKAR2B; FBP1; FBP2; TSC2; TSC1; PKLR; PIK3CA; PHKB; FASN; PIK3R2; MAPK8; PYGM; CBLB; PRKCZ; SOS1; BRAF; PDPK1	5170; 572; 7248; 7249; 5257; 2194; 2203; 673; 5290; 5296; 5313; 5837; 51422; 3265; 868; 5563; 5571; 5577; 5590; 5599; 5105; 5106; 6654; 8789	137	137
Non-small cell lung cancer - Homo sapiens (human)	0.00603482	0.0459099	KEGG	path:hsa05223	ERBB2; FHIT; SOS1; CCND1; PIK3CA; HRAS; PLCG1; EML4; BAD; RXRB; PIK3R2; DDB2; PDPK1; BRAF	5170; 673; 5290; 27436; 5296; 572; 3265; 595; 5335; 2272; 2064; 1643; 6257; 6654	66	66
Insulin Signaling	0.00610156	0.0462598	Wikipathways	WP481	MAP4K5; HRAS; PRKAA2; GAB1; STXBP1; STXBP4; MAP2K4; TSC2; TSC1; PIK3CA; ARF1; TBC1D4; MAP3K4; PFKM; PFKL; PIK3R2; MAPK8; CBLB; IGF1R; PRKCZ; RPS6KA1; RPS6KA4; SOS1; GRB10; PTEN; PDPK1; MAP2K6	5170; 8986; 7248; 11183; 3480; 5590; 5599; 6654; 375; 5608; 2549; 7249; 4216; 3265; 252983; 2887; 868; 5563; 6195; 5296; 6812; 5290; 5213; 5211; 5728; 6416; 9882	160	160
Synthesis of PIPs at the plasma membrane	0.00620693	0.0468991	Reactome	R-HSA-1660499	PTEN; PTPN13; MTM1; ARF1; PLEKHA5; PLEKHA6; PI4K2B; PIK3R2; MTMR9; PIK3CA; MTMR2; PIP4K2C	55300; 4534; 375; 22874; 54477; 5296; 5783; 5728; 5290; 79837; 8898; 66036	53	53
Retinol metabolism - Homo sapiens (human)	0.00693011	0.050347	KEGG	path:hsa00830	AOX1; UGT2B4; ADH6; ADH5; UGT2B7; DHRS4; UGT2A3; DHRS3; RETSAT; RDH11; PNPLA4; UGT1A6; ALDH1A1; UGT1A9	128; 130; 10901; 9249; 8228; 51109; 54578; 79799; 316; 7363; 7364; 54600; 216; 54884	67	67
Inositol phosphate metabolism	0.00698298	0.050347	INOH	None	INPP5A; PLCB3; PTEN; PIK3CA; IMPA2; IMPA1; PLCG1; MIOX; PLCD1; PIP4K2C	5331; 5335; 3613; 3632; 3612; 55586; 5333; 5728; 5290; 79837	41	41
Energy dependent regulation of mTOR by LKB1-AMPK	0.00702242	0.050347	Reactome	R-HSA-380972	PRKAG1; PRKAG2; PRKAA2; LAMTOR4; LAMTOR5; MLST8; TSC2; TSC1	10542; 5563; 389541; 7249; 64223; 51422; 5571; 7248	29	29
Dopamine metabolism	0.00703899	0.050347	Wikipathways	WP2436	DDC; MAOB; MAOA; SOD1; NQO1	1644; 4129; 1728; 6647; 4128	13	13
Purine salvage	0.00703899	0.050347	Reactome	R-HSA-74217	GMPR2; PNP; ADAL; GMPR; DGUOK	1716; 2766; 51292; 161823; 4860	13	13
Constitutive Signaling by EGFRvIII	0.00703899	0.050347	Reactome	R-HSA-5637810	PIK3CA; HRAS; PLCG1; SOS1; GAB1	2549; 3265; 6654; 5290; 5335	13	13
Signaling by EGFRvIII in Cancer	0.00703899	0.050347	Reactome	R-HSA-5637812	PIK3CA; HRAS; PLCG1; SOS1; GAB1	2549; 3265; 6654; 5290; 5335	13	13
Phenylalanine degradation	0.00703899	0.050347	INOH	None	DDC; MAOB; MAOA; GOT1; GOT2	2805; 4128; 4129; 1644; 2806	13	13
multiple antiapoptotic pathways from igf-1r signaling lead to bad phosphorylation	0.00703899	0.050347	BioCarta	igf1rpathway	PIK3CA; HRAS; IGF1R; SOS1; BAD	3265; 3480; 6654; 5290; 572	13	13
trka receptor signaling pathway	0.00703899	0.050347	BioCarta	trkapathway	PDPK1; HRAS; PLCG1; SOS1; PIK3CA	3265; 5170; 6654; 5290; 5335	13	13
noradrenaline and adrenaline degradation	0.00703899	0.050347	HumanCyc	PWY-6342	MAOB; MAOA; RNLS; ADH6; ALDH2	4129; 55328; 217; 130; 4128	13	13
alpha-linolenic acid (ALA) metabolism	0.00703899	0.050347	Reactome	R-HSA-2046106	ABCD1; ACOX1; ACSL1; ACAA1; ACOT8	10005; 2180; 51; 30; 215	13	13
alpha-linolenic (omega3) and linoleic (omega6) acid metabolism	0.00703899	0.050347	Reactome	R-HSA-2046104	ABCD1; ACOX1; ACSL1; ACAA1; ACOT8	10005; 2180; 51; 30; 215	13	13
Processing of SMDT1	0.00703899	0.050347	Reactome	R-HSA-8949664	PHB2; AFG3L2; PMPCB; PMPCA; SPG7	11331; 23203; 10939; 6687; 9512	13	13
Doxorubicin Pathway (Cancer Cell), Pharmacodynamics	0.00706981	0.050347	PharmGKB	PA165292163	ABCG2; RALBP1; SOD1; MLH1; NQO1; ABCB1	1728; 4292; 10928; 9429; 6647; 5243	18	18
Estrogen metabolism	0.00706981	0.050347	Wikipathways	WP697	UGT2B7; ARSE; GSTA1; NQO1; UGT1A9; UGT1A6	2938; 1728; 54600; 7364; 415; 54578	18	18
Tie2 Signaling	0.00706981	0.050347	Reactome	R-HSA-210993	TEK; SOS1; PIK3CA; HRAS; PIK3R2; GRB7	3265; 2886; 6654; 5296; 5290; 7010	18	18
Cobalamin (Cbl, vitamin B12) transport and metabolism	0.00706981	0.050347	Reactome	R-HSA-196741	MUT; AMN; CUBN; MTRR; MMAA; ABCD4	8029; 166785; 4594; 81693; 4552; 5826	19	18
Histidine metabolism	0.00714895	0.0506233	EHMN	Histidine metabolism	ABAT; ALDH2; MAOB; MAOA; ALDH9A1; SLC22A2; ALDH7A1; ALDH1B1; SLC1A1	501; 4129; 6582; 4128; 219; 223; 6505; 18; 217	35	35
Signaling events mediated by Hepatocyte Growth Factor Receptor (c-Met)	0.00715404	0.0506233	PID	met_pathway	NCK2; SOS1; PIK3CA; HRAS; HGS; BAD; GAB1; PLCG1; PRKCZ; NUMB; MAP2K4; CDH1; PDPK1; MAPK8; MLST8; PAK1	2549; 999; 5170; 8650; 8440; 6654; 6416; 5599; 5590; 64223; 5335; 3265; 9146; 5290; 572; 5058	82	81
Amino sugar and nucleotide sugar metabolism - Homo sapiens (human)	0.00784144	0.0553119	KEGG	path:hsa00520	GALT; GNPNAT1; GPI; UXS1; GNPDA2; GNPDA1; PGM3; AMDHD2; UAP1L1; NANS; MPI	2821; 10007; 80146; 2592; 54187; 132789; 64841; 51005; 91373; 5238; 4351	48	48
Sterol Regulatory Element-Binding Proteins (SREBP) signalling	0.0079281	0.0557468	Wikipathways	WP1982	DBI; HMGCS1; YY1; PRKAG1; PIK3CA; ACSS1; PRKAG2; PRKAA2; AMFR; FASN; LSS; MDH1; CYP51A1; SCARB1	5290; 2194; 4047; 84532; 5563; 3157; 4190; 1595; 267; 949; 5571; 51422; 1622; 7528	68	68
Signaling by Insulin receptor	0.00805081	0.0564245	Reactome	R-HSA-74752	ATP6V1D; THEM4; ATP6V1A; SOS1; GRB10; HRAS; ATP6V1E1; ATP6V1H; GAB1; PIK3R2; ATP6V0A2; PIK3CA; PDPK1; ATP6V1B2; ATP6V0A1	2549; 5170; 23545; 529; 51382; 3265; 117145; 523; 5296; 535; 526; 2887; 6654; 5290; 51606	75	75
Glycerophospholipid biosynthesis	0.0080751	0.0564245	Reactome	R-HSA-1483206	STARD10; HADHA; GPD1; PGS1; CHKB; LPIN2; LPIN3; HADHB; DDHD2; PNPLA8; GPCPD1; PCYT1A; SLC44A3; PCYT2; OSBPL10; PLD1; PISD; AGPAT5; NDUFS3; AGPAT3; AGPAT2; GPD1L; STARD7	126969; 9663; 2819; 56894; 4722; 114884; 23761; 64900; 55326; 23171; 23259; 56261; 3030; 56910; 10809; 5130; 1120; 10555; 3032; 9489; 5337; 5833; 50640	133	133
Pentose phosphate cycle	0.00829417	0.0573982	INOH	None	GPI; PFKM; RBKS; PFKL; FBP1; FBP2; ALDOB	229; 8789; 2203; 2821; 64080; 5211; 5213	24	24
glycolysis	0.00829417	0.0573982	HumanCyc	PWY66-400	PKLR; GPI; PFKM; PFKL; ALDOB; PGK2; PGK1	5232; 5313; 5211; 5230; 229; 2821; 5213	25	24
proteasome complex	0.00829417	0.0573982	BioCarta	proteasomepathway	PSMA2; PSMA1; PSMA4; PSMB7; PSMB6; PSMB3; PSMB2	5691; 5682; 5695; 5690; 5694; 5685; 5683	24	24
Cilium Assembly	0.00831746	0.0573982	Reactome	R-HSA-5617833	RAB3IP; PCM1; ARL3; ARL6; PRKAR2B; DCTN3; CEP290; CEP97; B9D1; IFT140; TTC30A; KIF3B; HAUS4; HDAC6; RAB11A; IFT122; DYNC2LI1; LZTFL1; DYNC2H1; RAB11FIP3; EXOC6; BBS1; TUBB4B; BBS2; TTC21B; AKAP9; CEP135; WDR34; ACTR1A; WDR19	582; 9662; 8766; 5577; 79598; 9742; 55764; 80184; 54536; 27077; 9727; 79659; 92104; 51626; 57728; 10142; 5108; 10383; 117177; 583; 54930; 10121; 84100; 10013; 89891; 54585; 403; 79809; 11258; 9371	187	187
Trk receptor signaling mediated by PI3K and PLC-gamma	0.00868751	0.0591302	PID	pi3kplctrkpathway	EPB41L1; SOS1; CCND1; PIK3CA; HRAS; BAD; GAB1; PLCG1; PDPK1	2549; 595; 5335; 2036; 3265; 5170; 6654; 5290; 572	36	36
Detoxification of Reactive Oxygen Species	0.00868751	0.0591302	Reactome	R-HSA-3299685	TXN; GSR; SOD1; NUDT2; PRDX3; CYCS; TXN2; GSTP1; TXNRD2	2936; 10587; 318; 6647; 2950; 7295; 54205; 25828; 10935	36	36
Target Of Rapamycin (TOR) Signaling	0.00868751	0.0591302	Wikipathways	WP1471	ULK3; RICTOR; PRKAG1; PRKAG2; PRKAA2; MAPKAP1; MLST8; TSC2; TSC1	64223; 5563; 79109; 25989; 7249; 7248; 5571; 51422; 253260	36	36
Longevity regulating pathway - multiple species - Homo sapiens (human)	0.00882571	0.0591302	KEGG	path:hsa04213	ADCY5; IGF1R; ADCY6; SOD1; PRKAG1; PIK3CA; HRAS; PRKAG2; CRYAB; PRKAA2; ADCY9; PIK3R2; EIF4EBP2	1410; 3480; 5290; 5296; 3265; 5571; 51422; 5563; 111; 112; 115; 1979; 6647	62	62
Sulfur metabolism - Homo sapiens (human)	0.00895593	0.0591302	KEGG	path:hsa00920	PAPSS1; MPST; TST; SUOX	9061; 4357; 7263; 6821	9	9
Transport of nucleotide sugars	0.00895593	0.0591302	Reactome	R-HSA-727802	SLC35D1; SLC35B4; SLC35B3; SLC35A3	23169; 51000; 23443; 84912	9	9
Sulfide oxidation to sulfate	0.00907247	0.0591302	Reactome	R-HSA-1614517	TST; SUOX; SLC25A10	1468; 6821; 7263	5	5
GRB7 events in ERBB2 signaling	0.00907247	0.0591302	Reactome	R-HSA-1306955	ERBB2; ERBB3; GRB7	2064; 2886; 2065	5	5
fatty acid &alpha;-oxidation	0.00907247	0.0591302	HumanCyc	PWY66-387	SLC27A2; ACSL1; PHYH	2180; 5264; 11001	5	5
tyrosine degradation	0.00907247	0.0591302	HumanCyc	TYRFUMCAT-PWY	FAH; GSTZ1; HGD	2184; 2954; 3081	5	5
D-Glutamine and D-glutamate metabolism - Homo sapiens (human)	0.00907247	0.0591302	KEGG	path:hsa00471	GLS; GLUD2; GLUD1	2744; 2746; 2747	5	5
ornithine <i>de novo </i> biosynthesis	0.00907247	0.0591302	HumanCyc	ARGININE-SYN4-PWY	OAT; GLUD2; GLUD1	2747; 4942; 2746	5	5
4-hydroxy-2-nonenal detoxification	0.00907247	0.0591302	HumanCyc	PWY-7112	GSTP1; GSTA1; GSTA3	2940; 2950; 2938	5	5
Fructose catabolism	0.00907247	0.0591302	Reactome	R-HSA-70350	KHK; ALDH1A1; ALDOB	3795; 229; 216	5	5
Abacavir transmembrane transport	0.00907247	0.0591302	Reactome	R-HSA-2161517	ABCB1; ABCG2; SLC22A2	5243; 6582; 9429	5	5
phospholipase c signaling pathway	0.00907247	0.0591302	BioCarta	plcpathway	PIK3CA; PLCG1; PDPK1	5335; 5290; 5170	5	5
HDL clearance	0.00907247	0.0591302	Reactome	R-HSA-8964011	CUBN; SCARB1; AMN	8029; 81693; 949	5	5
NAD biosynthesis from 2-amino-3-carboxymuconate semialdehyde	0.00907247	0.0591302	HumanCyc	PWY-5653	QPRT; NMNAT1; NMNAT3	23475; 349565; 64802	6	5
asparagine degradation	0.00907247	0.0591302	HumanCyc	ASPARAGINE-DEG1-PWY-1	ASPG; ASRGL1; GOT1	80150; 2805; 374569	5	5
NRF2 pathway	0.00917884	0.0596491	Wikipathways	WP2884	GSR; GSTA1; GSTA3; MGST3; UGT1A9; UGT1A6; SLC5A1; TXN; CBR1; SLC6A19; CBR3; SLC5A12; SLC5A10; UGT2B7; PTGR1; CES2; NQO1; SLC39A7; SLC2A9; SLC2A8; GSTM4; SLC2A2; GSTP1; GGT1	7364; 54600; 159963; 29988; 125206; 8824; 6514; 2938; 2936; 1728; 2678; 56606; 7922; 7295; 6523; 2950; 2948; 2940; 874; 873; 4259; 22949; 54578; 340024	142	142
Metabolism of porphyrins	0.00945492	0.0612646	Reactome	R-HSA-189445	HMBS; PPOX; UGT1A9; UGT1A6; COX15; FECH	5498; 54578; 2235; 1355; 54600; 3145	19	19
Vitamin E metabolism	0.00990416	0.0639895	EHMN	Vitamin E metabolism	HADH; HSD17B10; ACOX1; ECHS1; HADHB; EHHADH; HADHA; ACAA2; ACOT2; ACOT1	3028; 3032; 641371; 3030; 10449; 10965; 3033; 1892; 51; 1962	43	43

## Sheet: GP3_proteins
GP3 up-regulated proteins									GP3 down-regulated proteins
Gene symbols	GP3	GP1&GP2	Fold change	p-value	None-zero in GP3	None-zero in GP1&GP2			Gene symbols	GP3	GP1&GP2	Fold change	p-value	None-zero in GP3	None-zero in GP1&GP2
A1BG	15.3471	7.34443	2.08962	0.000225867	78	154			A1CF	0.0887809	0.296329	0.299603	0.00121865	47	113
ADD2	0.280599	0.115437	2.43076	0.000671069	66	106			AACS	0.0173978	0.10572	0.164565	3.91e-09	35	120
AHSG	29.2873	11.9411	2.45265	7.51e-06	78	154			AAGAB	0.0489971	0.145813	0.336027	5.1e-06	31	106
ANGPTL2	1.26336	0.614282	2.05665	5.75e-05	78	144			AAK1	0.117802	0.278498	0.422992	2.58e-05	70	152
ANK1	1.1451	0.523866	2.18587	4.69e-06	78	153			AAMDC	0.213132	0.588185	0.362356	0.000528391	49	122
ANKRD49	0.116452	0.0386213	3.01522	0.0280969	15	56			AAMP	0.189022	0.505682	0.373795	1.74e-06	50	135
ANTXR1	0.129123	0.0126562	10.2023	0.000627974	42	49			AAR2	0.0442563	0.0940374	0.470624	0.000196716	49	128
APOA1	972.704	428.895	2.26793	3.05e-07	78	154			AARS	0.840636	2.03585	0.412916	6.79e-12	78	154
APOC3	9.42859	4.22007	2.23423	0.0425378	77	149			AARS2	0.142938	0.489579	0.29196	6.67e-09	65	153
APOC4	0.12147	0.0586648	2.07057	0.000183373	33	26			AASDHPPT	0.127839	0.485717	0.263196	2.53e-08	65	149
APOH	45.0212	18.07	2.4915	5.15e-08	78	154			AASS	0.0892447	0.429254	0.207907	0.0293755	59	123
ASPN	42.3365	11.8767	3.56467	2.87e-05	78	148			AATF	0.00829513	0.0435747	0.190366	3.62e-06	16	73
BCHE	0.0539524	0.0161566	3.33935	7.09e-08	69	93			ABAT	1.65962	4.53535	0.36593	0.00195266	69	147
BGN	402.057	164.51	2.44397	0.000421204	78	154			ABCA3	0.00141103	0.0229651	0.0614421	5.84e-05	12	51
CCDC80	0.110231	0.0152626	7.2223	9.06e-05	36	30			ABCB1	0.0750062	0.286939	0.261401	0.000399322	60	131
CDKN1C	0.298786	0.0625548	4.77639	0.0438489	28	40			ABCB10	0.0404679	0.214338	0.188804	9.79e-08	58	141
CHD1	0.0370233	0.00485721	7.62235	0.00141061	16	63			ABCB11	0.00165949	0.0113151	0.146661	4.3e-05	14	61
CLDN5	0.140004	0.0509261	2.74916	3.57e-05	57	72			ABCB6	0.216657	0.455179	0.475982	0.00117665	75	153
CLEC3B	8.52584	2.72151	3.13275	3.17e-05	78	150			ABCB7	0.075751	0.256056	0.295838	1.52e-07	70	154
CNDP1	0.147442	0.0421666	3.49664	6.1e-06	53	58			ABCB8	0.0271169	0.135467	0.200173	2.93e-08	36	119
COG3	1.62003	0.514038	3.15157	1.57e-06	55	143			ABCC2	0.000953718	0.0201468	0.0473385	7.12e-10	9	64
COL14A1	17.1617	5.60334	3.06277	1.87e-06	78	154			ABCD1	0.0563314	0.202258	0.278512	1.55e-07	63	149
COL2A1	0.406697	0.114463	3.55308	0.00194716	49	71			ABCD3	0.19958	0.711702	0.280427	3.36e-09	72	154
COL3A1	0.998491	0.326978	3.05369	0.000110601	77	142			ABCD4	0.0145221	0.120831	0.120185	0.00885366	36	90
COL5A1	0.15009	0.0658699	2.27859	2.85e-09	73	97			ABCE1	0.446943	0.984206	0.454115	3.89e-07	75	154
COL5A2	0.324055	0.147993	2.18967	9.72e-08	78	149			ABCF1	0.373999	0.832394	0.449305	6.77e-07	75	154
CPN1	0.144932	0.0545367	2.65751	0.0238216	60	99			ABCF3	0.0776536	0.243517	0.318884	5.86e-06	70	149
CPN2	1.3937	0.348273	4.00175	1.37e-05	78	149			ABCG1	0.00641436	0.0184093	0.348431	0.0220498	16	51
CYP4X1	0.0481474	0.0193812	2.48423	0.0021454	48	63			ABHD10	2.39066	7.42567	0.321946	1.22e-07	76	154
DAAM2	0.0617529	0.0239956	2.57351	3.37e-06	55	62			ABHD11	0.350192	1.43173	0.244593	7.46e-08	73	152
DCN	28.4727	10.323	2.75819	0.00159504	77	143			ABHD14B	3.83029	8.33038	0.459798	1.54e-09	78	154
DPT	26.3864	9.26971	2.84651	0.00050147	78	149			ABHD16A	0.221948	0.67223	0.330167	5.51e-07	71	153
ECM2	0.0665282	0.0210435	3.16146	0.0383206	38	54			ABI2	0.046549	0.123589	0.376645	0.000311479	46	120
ELN	0.13833	0.0285261	4.84924	5.88e-06	44	42			ABLIM1	0.234149	0.524844	0.446131	0.000606823	73	152
ELTD1	0.0326809	0.0142618	2.2915	0.00353742	47	62			ABLIM2	0.0153138	0.0610367	0.250896	0.00837545	30	79
EPB42	0.678953	0.307427	2.2085	9.35e-07	78	149			ABR	0.0584419	0.187064	0.312417	5.96e-05	61	143
F11	0.0394562	0.017239	2.28877	8.05e-06	50	53			ABT1	0.00580474	0.0291053	0.199439	0.000188401	11	52
FAM198B	0.021836	0.00811721	2.69009	5.02e-06	57	69			ACAA1	0.623436	2.85375	0.218462	9.68e-09	76	154
FAP	0.0794505	0.0356171	2.23069	1.28e-06	44	31			ACAA2	10.0106	33.2763	0.300834	4.03e-08	77	154
FBLN2	1.47603	0.65776	2.24403	0.000169485	77	148			ACACA	0.0213896	0.0961645	0.222427	3.05e-10	49	141
FBLN5	20.7139	4.58198	4.52074	6.45e-06	77	149			ACAD10	0.017855	0.225171	0.0792954	2.22e-08	29	105
FCN2	0.0399609	0.0163336	2.44654	0.00360747	33	36			ACAD8	0.216627	1.01135	0.214197	4.36e-07	65	150
GUCY1A2	0.0318219	0.0137805	2.30921	1.07e-05	47	45			ACAD9	0.251988	0.661526	0.380919	1.18e-06	74	154
HBQ1	0.140226	0.0495975	2.82728	3.64e-06	56	63			ACADL	0.727285	2.37537	0.306177	0.0110205	64	133
HBZ	46.6349	20.8871	2.23271	0.00084923	42	44			ACADM	2.95192	10.803	0.273251	2.47e-07	76	154
HGFAC	0.0409138	0.0160709	2.54583	5.08e-05	60	82			ACADS	1.40703	4.13223	0.340503	6.36e-07	75	153
HMCN1	0.0614167	0.0256408	2.39527	4.17e-07	68	96			ACADSB	0.493787	2.84369	0.173643	0.000152488	72	149
HSPA12B	1.06655	0.522242	2.04225	0.00693637	70	124			ACADVL	6.57507	15.202	0.432513	1.05e-06	77	154
IGFALS	0.924345	0.430646	2.14641	2.52e-05	78	148			ACAP1	0.0166237	0.0521018	0.319062	0.0205201	13	46
ISLR	0.150321	0.0468469	3.20877	3.7e-06	54	61			ACAT1	8.32283	48.6436	0.171098	3.73e-11	78	154
ITGA11	0.243844	0.0308988	7.89169	4.97e-06	48	43			ACAT2	0.478784	0.967119	0.495062	2.55e-05	76	154
ITGA8	0.0279799	0.0138311	2.02297	0.0204841	35	45			ACBD3	0.350777	0.923036	0.380026	3.45e-07	76	154
ITIH1	63.8527	19.7036	3.24067	1.7e-10	78	154			ACBD6	0.0480915	0.137831	0.348916	0.000389611	44	114
ITIH2	20.7556	7.78468	2.66622	4.01e-08	78	154			ACE2	0.610972	3.02053	0.202273	0.0323574	64	130
KNG1	12.9576	5.80815	2.23093	1.52e-05	78	154			ACLY	13.1301	30.422	0.431597	1.29e-08	78	154
LCAT	0.0481867	0.0194825	2.47333	0.000179292	42	43			ACMSD	0.0249276	0.0998111	0.249747	3.08e-05	23	83
LILRB5	0.0275271	0.0111616	2.46624	1.34e-05	47	46			ACO1	1.0617	4.5487	0.233407	9.27e-11	78	154
LTBP2	0.546075	0.178903	3.05235	2.35e-09	73	103			ACO2	12.1314	42.7024	0.284091	3.11e-14	78	154
LTBP4	0.746314	0.287395	2.59682	4.78e-07	72	116			ACOT1	0.0612303	0.850454	0.0719971	0.000522018	12	49
LUM	404.279	197.656	2.04537	3.51e-05	78	154			ACOT11	0.0283987	0.187471	0.151484	2.58e-10	28	116
MFAP4	10.8486	3.9972	2.71404	0.000202383	75	132			ACOT13	2.32689	9.55657	0.243486	2.05e-05	75	151
MFAP5	1.65063	0.620016	2.66223	0.00829643	64	101			ACOT2	0.209338	0.935708	0.223722	0.00337626	60	132
MICAL2	0.0286454	0.00698214	4.10266	0.00955377	34	39			ACOT7	1.14404	2.3571	0.485359	9.61e-05	75	154
MMP2	0.0829331	0.040774	2.03397	9.6e-06	60	74			ACOT8	0.0205931	0.155319	0.132586	1.82e-06	42	120
NBEAL1	0.0288759	0.0140173	2.06001	0.0212092	46	107			ACOX1	0.39583	0.99072	0.399538	8.82e-06	71	153
NGDN	0.153954	0.0593553	2.59376	0.0367965	19	62			ACOX2	0.038785	0.220637	0.175787	0.000318475	35	98
NGFR	0.130957	0.0274995	4.76217	0.00035543	50	61			ACOX3	0.116741	0.323041	0.36138	6.04e-05	72	150
NOTCH3	0.105159	0.0396738	2.6506	0.0157421	66	118			ACP2	0.182005	0.449919	0.404528	0.000138362	71	149
OLFML1	1.16106	0.463519	2.50489	6.15e-08	74	114			ACSF2	0.179241	1.81632	0.0986835	1.84e-05	61	142
OLFML3	1.09242	0.463996	2.35438	6.37e-06	76	127			ACSF3	0.0448615	0.127714	0.351265	0.000114329	58	137
P2RY8	0.0185686	0.00888701	2.08941	0.00234879	33	34			ACSL1	1.65069	8.02778	0.205622	2.52e-11	77	154
PCOLCE	5.65089	1.81482	3.11374	5.48e-06	73	110			ACSL3	0.52808	1.15525	0.457112	4.94e-07	76	154
PEAK1	0.0413071	0.0183768	2.24778	1.37e-05	63	81			ACSL4	0.344728	0.836955	0.411883	3.94e-06	73	154
PLAC9	0.352317	0.0749721	4.69931	0.00254624	33	34			ACSM2A	1.46984	14.5973	0.100693	0.0159511	63	129
PLXDC1	0.0337081	0.0159948	2.10744	0.0138679	45	64			ACSM2B	1.92363	16.0009	0.12022	0.0188485	65	132
PODN	0.136656	0.0559592	2.44206	1.22e-05	45	43			ACSM3	0.161599	1.55121	0.104176	4.14e-10	44	136
PON1	4.71018	2.25079	2.09268	0.00354615	78	154			ACSM5	0.0216491	0.135134	0.160205	7.85e-07	25	91
POSTN	125.302	40.263	3.11208	9.16e-07	78	154			ACSS1	0.150349	0.955189	0.157402	1.77e-07	66	151
PRELP	53.53	26.131	2.04852	0.000138618	78	152			ACSS2	0.0820905	0.496103	0.165471	1.67e-07	62	149
PROC	0.268246	0.097479	2.75183	0.00146642	62	97			ACTL6A	0.693532	1.41507	0.490106	0.000331386	76	150
RAPGEF1	0.0708228	0.0345905	2.04746	0.0469623	30	80			ACY1	1.96147	13.6833	0.143348	6.92e-05	74	149
RPS6KA2	0.282591	0.108099	2.61419	0.0217931	29	35			ACY3	0.202988	0.707321	0.286982	0.00200951	59	131
S1PR1	0.0588209	0.0281942	2.08628	0.0188693	35	44			ACYP2	0.0786164	0.292301	0.268957	1.5e-05	40	115
SENP3	0.123775	0.0580818	2.13104	0.0331667	46	114			ADA	0.350919	1.00297	0.34988	0.00235458	73	151
SERPING1	19.6613	9.21623	2.13333	0.000323611	78	154			ADAL	0.00544526	0.0197204	0.276123	0.0137556	15	50
SHBG	0.090895	0.0193609	4.69477	0.00466809	47	66			ADAM9	0.00377154	0.0164481	0.2293	0.00253356	30	84
SLC4A1	17.0654	6.03201	2.82914	3.01e-07	78	154			ADCK1	0.0206695	0.100095	0.206498	0.0154595	16	54
SLFN12L	0.110394	0.031654	3.48752	2.12e-05	45	43			ADCK3	0.21854	0.586001	0.372934	3.68e-06	68	150
SLIT3	0.0306558	0.0147883	2.07297	2.61e-05	53	64			ADCK4	0.0255585	0.0939758	0.271968	6.42e-07	42	126
SSC5D	0.0454994	0.010612	4.28753	4.81e-05	43	39			ADCK5	0.00313051	0.0201605	0.15528	1.55e-06	20	83
SULF1	0.634277	0.281024	2.25702	0.00878999	29	35			ADCY6	0.000901923	0.00421545	0.213956	0.0166139	13	46
TF	475.688	211.463	2.24952	4.35e-07	78	154			ADCY9	0.00139769	0.00442753	0.315682	0.0231014	16	50
THBS2	2.41131	0.94028	2.56446	4.55e-05	72	116			ADH5	4.95461	10.0702	0.492009	2.78e-08	78	154
TMEM41B	0.0701918	0.0332572	2.11057	0.000169798	22	83			ADH6	0.0123756	0.221899	0.0557716	1.21e-05	18	75
TNXB	1.00572	0.314855	3.19422	1.02e-06	77	144			ADHFE1	0.00886987	0.101329	0.0875353	2.72e-09	13	77
UBE2B	1.44469	0.702122	2.0576	0.010564	30	92			ADI1	0.203966	0.78967	0.258292	4.24e-07	55	141
VPS54	0.0200053	0.00716883	2.79059	6.59e-05	17	74			ADK	0.42124	0.856536	0.491794	2.52e-06	77	153
									ADNP	0.0239991	0.0535376	0.448266	0.0370885	65	135
									ADO	0.0890059	0.30073	0.295966	1.89e-05	52	134
									ADPGK	0.277143	0.655273	0.422942	1.31e-07	76	154
									ADPRHL2	0.942058	1.90917	0.493438	8.87e-09	78	154
									ADRBK1	0.0994008	0.362265	0.274387	0.000117357	72	148
									ADSS	0.819643	1.73136	0.473409	1.22e-06	76	154
									AFG3L2	0.803233	2.32052	0.346144	4.23e-09	77	154
									AFTPH	0.0504333	0.145354	0.34697	6.06e-10	38	130
									AGA	0.20432	0.499208	0.409288	0.00046035	65	148
									AGAP3	0.0163919	0.0502371	0.326291	0.000274103	31	93
									AGFG1	0.206066	0.723133	0.284962	4.03e-07	75	153
									AGK	0.470676	1.03863	0.453172	4.13e-06	72	154
									AGMAT	0.9067	5.57718	0.162573	0.000307742	70	146
									AGPAT1	0.139298	0.281987	0.493986	0.0185678	66	139
									AGPAT2	0.0148945	0.0703612	0.211686	3.94e-05	21	81
									AGPAT3	0.484341	1.47434	0.328514	2.16e-05	71	153
									AGPAT5	0.228877	0.597832	0.382845	1.03e-06	69	152
									AGPAT9	0.0264369	0.0773713	0.341689	0.00196831	20	66
									AGPS	0.411386	0.845832	0.486369	2.33e-06	74	154
									AGTRAP	0.373682	0.902043	0.414262	1.97e-06	68	153
									AGXT2	0.134214	0.846521	0.158548	0.00148386	39	101
									AHCY	1.93998	7.18296	0.27008	1.67e-20	78	154
									AHCYL1	0.537034	1.66539	0.322467	4.07e-07	73	153
									AHCYL2	0.363965	1.00922	0.360641	0.00150043	54	127
									AHSA1	0.85304	2.28593	0.37317	7.74e-06	74	152
									AIF1L	0.232385	1.01446	0.229071	0.0106002	55	123
									AIFM1	5.83042	27.6889	0.210569	1.56e-09	77	154
									AIG1	0.119271	0.446548	0.267097	7.09e-07	31	108
									AIM1	0.130657	0.32046	0.407716	1.65e-06	66	151
									AIMP1	0.855803	1.94269	0.440525	1.86e-07	76	154
									AIMP2	0.407382	0.947055	0.430157	1.25e-06	76	154
									AK2	6.25001	20.9426	0.298435	5.67e-10	77	154
									AK3	1.27821	3.80831	0.335636	4.25e-05	76	153
									AK9	0.0101042	0.0409041	0.247022	2.16e-06	15	71
									AKAP11	0.00238423	0.00975156	0.244497	0.000661246	21	70
									AKAP13	0.0196226	0.0590925	0.332065	1.86e-06	62	150
									AKAP8	0.0480872	0.172333	0.279036	0.0171991	48	113
									AKAP8L	0.035229	0.0772527	0.456023	9.47e-05	52	133
									AKAP9	0.0356137	0.123933	0.287364	2.81e-08	71	152
									AKR1A1	5.69872	22.5099	0.253165	7.83e-17	78	154
									AKR1C3	2.86236	9.44283	0.303126	2.95e-11	78	154
									AKR7A2	6.40578	13.1042	0.488834	4.99e-07	78	154
									AKR7A3	2.58902	6.29584	0.411227	0.0358378	72	144
									AKT1S1	0.111129	0.358754	0.309765	0.00461555	50	118
									AKTIP	0.134527	0.271211	0.496023	0.00069034	38	107
									ALDH18A1	0.564807	1.77372	0.31843	3.8e-09	76	154
									ALDH1A2	0.0499749	0.569237	0.0877927	0.0208122	14	44
									ALDH1B1	1.10301	6.24739	0.176556	0.000428524	75	153
									ALDH1L2	0.101698	0.57071	0.178195	0.0283159	56	118
									ALDH2	5.21679	19.4377	0.268385	6.86e-08	76	154
									ALDH3A2	1.35424	3.77283	0.358946	1.3e-06	77	154
									ALDH3B1	0.0756162	0.260541	0.290228	9.46e-06	52	130
									ALDH4A1	1.3106	11.6394	0.1126	8.38e-08	75	152
									ALDH5A1	0.612288	1.2908	0.474348	4.02e-05	70	153
									ALDH6A1	4.20749	29.601	0.14214	5.91e-06	77	154
									ALDH7A1	11.2903	23.849	0.473408	9.81e-06	78	154
									ALDH9A1	3.91929	8.70623	0.450171	2.64e-11	78	154
									ALDOA	81.3528	195.044	0.4171	5.95e-12	78	154
									ALDOC	5.70011	14.5567	0.391579	2.01e-11	78	154
									ALG1	0.119627	0.324969	0.368118	1.82e-06	68	152
									ALG11	0.122519	0.292616	0.418703	1.75e-06	59	148
									ALG13	0.0159671	0.0689408	0.231605	1.71e-06	25	95
									ALG2	0.534819	1.24973	0.427948	7.67e-07	76	154
									ALG3	0.0414814	0.158627	0.261503	2.74e-06	53	136
									ALG9	0.0306782	0.0958764	0.319977	0.00580474	48	118
									ALKBH5	0.0386515	0.114379	0.337925	1.45e-05	56	137
									ALOX5AP	0.667116	2.12025	0.31464	0.00497218	55	128
									ALS2	0.00106526	0.0450226	0.0236605	2.83e-06	19	76
									ALYREF	0.509106	1.41407	0.360028	1.72e-07	69	154
									AMACR	0.787783	2.45794	0.320505	2.01e-07	70	152
									AMDHD1	0.0307781	0.208076	0.147917	4.65e-07	29	102
									AMDHD2	0.272393	0.615888	0.442277	4.47e-05	74	151
									AMFR	0.00570333	0.0158028	0.360907	0.00139521	12	51
									AMN	0.470109	1.47696	0.318295	0.0351665	56	119
									AMPD2	0.628486	1.46987	0.427579	3.75e-07	77	154
									AMPD3	0.147971	0.33794	0.437862	0.0451999	73	144
									AMT	0.00270154	0.0744662	0.0362787	3.98e-09	6	55
									ANAPC1	0.00685821	0.0358497	0.191304	4.73e-05	54	128
									ANAPC2	0.00455808	0.0320056	0.142415	0.000332446	25	78
									ANAPC5	0.00913359	0.0462616	0.197433	0.00041329	36	105
									ANAPC7	0.0531523	0.122649	0.433368	0.000181411	60	143
									ANGEL2	0.00817436	0.0281942	0.289931	4.85e-09	8	64
									ANK2	0.050545	0.172823	0.292466	0.000456891	57	134
									ANK3	0.486468	1.16087	0.419054	0.0279042	69	143
									ANKFY1	0.462318	1.14928	0.402266	2.75e-08	78	154
									ANKIB1	0.00966115	0.0989015	0.0976846	1.19e-05	21	81
									ANKLE2	0.0133154	0.0594309	0.224048	9.23e-06	28	98
									ANKMY2	0.0169944	0.0930723	0.182593	1.24e-09	42	131
									ANKRD17	0.0101053	0.0323361	0.312507	2.14e-05	37	108
									ANKRD22	0.0107221	0.107058	0.100152	0.000193602	16	62
									ANKRD28	0.0179724	0.0909138	0.197686	7.11e-05	33	101
									ANKS1A	0.0199667	0.0754649	0.264582	3.19e-05	58	135
									ANKS3	0.00960615	0.0624782	0.153752	9.94e-08	20	90
									ANKZF1	0.0412236	0.0968579	0.425609	1.42e-06	34	113
									ANP32A	1.95193	6.07266	0.32143	6.08e-07	61	149
									ANP32B	4.27618	9.5145	0.449438	2.77e-06	76	154
									ANPEP	3.1225	28.3859	0.110002	0.000269467	77	154
									ANXA4	255.067	519.68	0.490817	1.42e-05	78	154
									AOX1	0.151402	0.680561	0.222466	0.0137135	54	117
									AP1G1	0.660937	1.52044	0.4347	8.21e-09	77	154
									AP1G2	0.0405937	0.1031	0.393732	4.65e-05	57	138
									AP1S1	0.449855	1.11874	0.402109	6.85e-06	70	152
									AP1S2	0.12697	0.282381	0.449643	0.0178803	49	111
									AP1S3	0.200169	0.568252	0.352253	0.0113547	43	107
									AP2M1	1.60571	4.59288	0.349608	2.19e-08	78	154
									AP3M1	0.584259	1.28971	0.453016	4.4e-06	74	154
									AP3M2	0.127757	0.348938	0.366131	0.000613134	62	137
									AP4B1	0.0013509	0.0117312	0.115154	0.00809848	21	63
									AP4S1	0.0279963	0.0756857	0.369902	0.00186314	27	84
									AP5M1	0.0113612	0.0816746	0.139103	6.5e-05	21	75
									AP5S1	0.0115679	0.105065	0.110103	0.00843188	18	58
[truncated: 3,367 more rows]

## Sheet: GP3_pathways
GP3 up-regulated pathways	p-value	q-value	source	external_id	members_input_overlap	members_input_overlap_geneids	size	effective_size			GP3 down-regulated pathways	p-value	q-value	source	external_id	members_input_overlap	members_input_overlap_geneids	size	effective_size
[truncated: 546 more rows]

[truncated: 2 more sheets: Deconvolution , drug targets]
