# Supplementary material for: A Proteogenomic Atlas of Clear Cell Renal Cell Carcinoma in a Chinese Population
Source: Research Square preprint supplement (doi:10.21203/rs.3.rs-221123/v1), 2021-02-26
Supplement: Supplementary file 10 [file 83ec6720ea1bbf64afe427a9.xlsx]

## Sheet: Description
Table S5: GSVA analysis for metabolic pathways; Related to Figure 4.
Metabolic pathways	GSVA estimated metabolic pathway scores of tumor and tumor adjacent samples.

## Sheet: Metabolic pathways
Metabolic pathways	ccRCC_107_T	ccRCC_104_T	ccRCC_103_T	ccRCC_102_T	ccRCC_99_T	ccRCC_94_T	ccRCC_83_T	ccRCC_67_T	ccRCC_64_T	ccRCC_61_T	ccRCC_58_T	ccRCC_52_T	ccRCC_50_T	ccRCC_49_T	ccRCC_47_T	ccRCC_43_T	ccRCC_41_T	ccRCC_33_T	ccRCC_30_T	ccRCC_29_T	ccRCC_26_T	ccRCC_25_T	ccRCC_24_T	ccRCC_22_T	ccRCC_18_T	ccRCC_13_T	ccRCC_12_T	ccRCC_11_T	ccRCC_8_T	ccRCC_7_T	ccRCC_6_T	ccRCC_5_T	ccRCC_4_T	ccRCC_3_T	ccRCC_2_T	ccRCC_1_T	ccRCC_109_T	ccRCC_111_T	ccRCC_115_T	ccRCC_124_T	ccRCC_131_T	ccRCC_142_T	ccRCC_166_T	ccRCC_171_T	ccRCC_189_T	ccRCC_198_T	ccRCC_231_T	ccRCC_232_T	ccRCC_10_T
KEGG_PENTOSE_PHOSPHATE_PATHWAY	-0.0911512	-0.358037	0.144306	0.0735292	0.350152	-0.124002	0.130196	-0.337182	0.331694	-0.522491	0.0666619	-0.295269	-0.696043	-0.298751	0.130598	0.273614	-0.653181	0.333933	-0.553748	0.514183	-0.153476	-0.296466	0.184672	0.509536	0.127121	-0.0179266	0.362252	-0.215012	0.384091	0.0495399	-0.618812	-0.566022	0.282351	0.277254	-0.130992	-0.568488	0.369163	0.133865	0.125234	-0.635992	0.383493	-0.0685588	0.149064	0.396775	0.343691	-0.418778	-0.642311	-0.624688	-0.59692
KEGG_STEROID_BIOSYNTHESIS	-0.256628	-0.151754	0.126549	-0.0752491	-0.185242	-0.360342	-0.495444	-0.170101	-0.62142	-0.578128	0.146097	-0.357498	-0.361605	-0.434917	0.226838	-0.250081	-0.347242	-0.273049	-0.0984182	-0.430134	-0.0910017	-0.263923	0.126444	-0.245517	-0.203868	-0.207369	-0.409394	-0.334242	-0.141156	-0.155105	-0.435732	-0.41002	0.0146704	-0.0432878	-0.16535	0.288351	0.396312	-0.232861	0.571716	0.367096	0.301643	0.106639	-0.123922	0.462159	0.211728	0.562283	-0.392642	-0.330168	0.0273164
KEGG_PURINE_METABOLISM	0.0112728	0.0209933	0.0354579	-0.153738	-0.0142939	-0.119017	0.0305561	-0.038216	0.0106981	-0.198538	-0.0455606	-0.125636	-0.207928	-0.180996	0.043041	0.132626	-0.270975	-0.100108	-0.149785	0.0939181	-0.101901	-0.19818	-0.00622107	-0.00421957	0.103901	0.192013	0.185613	-0.103944	0.0506556	0.0629846	-0.241128	-0.0562633	0.22051	0.163628	-0.148309	0.0256614	0.117633	0.165196	-0.2616	-0.272606	0.281856	0.108448	0.0108103	-0.0928192	0.11094	0.0325257	-0.298957	-0.283327	-0.0407446
KEGG_PYRIMIDINE_METABOLISM	0.11651	0.0855377	-0.0174457	-0.110466	-0.0633505	-0.205035	0.142739	-0.122434	-0.0580031	-0.196867	0.021673	-0.262751	-0.0907331	-0.278344	0.116958	-0.0146292	-0.39418	-0.159892	0.0373777	0.122072	0.0118427	-0.210135	0.0375796	-0.0389981	0.0853109	0.3239	0.184904	-0.0208822	-0.00309159	0.104055	-0.364648	-0.178426	0.218543	0.121564	-0.204407	0.129494	0.417355	0.241646	-0.312866	-0.394817	0.282357	0.164813	-0.0830877	-0.0639186	0.219609	0.16862	-0.376985	-0.421023	-0.0165724
KEGG_SPHINGOLIPID_METABOLISM	-0.0522851	-0.220781	-0.193772	-0.27712	-0.0779355	-0.285166	-0.266727	-0.0718742	-0.274303	-0.232616	-0.0817123	-0.23397	-0.400258	-0.0657352	-0.287847	0.0369735	-0.216021	-0.28068	-0.212087	-0.221986	-0.145423	-0.165804	-0.0405024	-0.0524262	0.0959473	0.151885	-0.0724291	-0.0587838	-0.26573	-0.231027	-0.259297	-0.197863	-0.239203	0.476103	-0.253767	-0.0191393	-0.0325385	-0.154407	0.382254	-0.150615	-0.121008	-0.0698605	-0.242009	0.172536	-0.0169707	0.0282946	-0.0533585	-0.194836	-0.382225
KEGG_CYSTEINE_AND_METHIONINE_METABOLISM	-0.357755	-0.211566	-0.301991	0.294856	-0.0581923	-0.13769	-0.0564583	-0.306326	0.0695762	-0.425407	-0.307952	-0.348643	-0.288316	-0.485615	-0.00113489	0.041268	-0.472171	-0.0345986	-0.379494	0.251488	0.137149	-0.18195	-0.110869	0.262043	-0.244272	-0.234673	0.4251	-0.421323	0.245665	0.0110818	-0.513867	-0.287502	0.181503	-0.00961357	-0.439675	-0.391294	0.269621	-0.086855	-0.226409	-0.466426	0.080448	-0.317171	-0.171935	-0.158186	0.173844	-0.227962	-0.456726	-0.492161	-0.552004
REACTOME_GLYCOGEN_METABOLISM	-0.0503757	0.0519096	0.0229008	-0.462979	0.526053	0.172663	0.116495	-0.00895158	0.43562	-0.116197	0.0357705	0.485279	-0.187952	0.0825281	0.15856	0.454237	-0.451607	0.399576	0.0726123	0.452726	0.330443	0.317847	0.359529	0.29131	0.0907482	-0.122695	0.535428	-0.0711287	0.606045	0.134273	-0.537242	-0.419794	0.343287	0.509826	0.11583	-0.484499	0.533456	0.312659	0.279497	-0.554777	0.632551	0.00495408	0.425931	0.543014	0.495423	-0.240982	0.0870059	-0.554325	0.0129563
KEGG_ONE_CARBON_POOL_BY_FOLATE	-0.362965	-0.526491	-0.339142	0.286676	-0.399249	-0.145201	-0.366839	-0.242232	-0.536043	-0.386957	-0.480654	-0.623396	-0.678671	-0.485006	-0.363341	-0.350729	-0.575209	-0.43348	-0.514397	0.233205	-0.196304	-0.55486	-0.363102	0.0694897	-0.325466	-0.0359306	-0.195043	-0.220832	-0.591829	-0.541204	-0.444544	-0.435121	-0.0708179	-0.23327	-0.599519	-0.460245	-0.1703	-0.154676	-0.214829	-0.578976	-0.032293	-0.176849	-0.473165	-0.390984	0.0974109	-0.265175	-0.493282	-0.556016	-0.537649
REACTOME_METABOLISM_OF_LIPIDS	-0.162731	-0.211466	-0.178741	8.23641e-05	-0.157313	-0.221876	-0.243257	-0.212483	-0.259173	-0.291026	-0.202225	-0.239284	-0.250305	-0.175587	-0.155785	-0.15537	-0.328879	-0.157581	-0.284455	-0.124071	-0.188504	-0.239245	-0.163363	-0.0702214	-0.178	-0.118877	-0.144658	-0.0734704	-0.159918	-0.179491	-0.328594	-0.322246	-0.0889897	-0.047452	-0.192048	-0.11046	-0.0104489	-0.0824036	0.0114268	-0.181086	-0.0942168	-0.169487	-0.167192	0.003448	-0.0641518	-0.035001	-0.252206	-0.323651	-0.174067
KEGG_GLUTATHIONE_METABOLISM	-0.270906	-0.495974	-0.278627	0.316525	-0.245117	-0.415223	-0.310229	-0.488677	-0.271306	-0.608517	-0.401719	-0.425735	-0.57269	-0.562347	-0.299287	-0.163	-0.592287	-0.199227	-0.556536	0.0421114	-0.158456	-0.55028	-0.137479	0.00714308	-0.26162	-0.239312	-0.163295	-0.224435	-0.154675	-0.332202	-0.512304	-0.469465	-0.148344	-0.215262	-0.442938	-0.465874	-0.132764	-0.154525	-0.140112	-0.533786	-0.227117	-0.257059	-0.180468	-0.163681	-0.112027	-0.233783	-0.628648	-0.565895	-0.586963
KEGG_FOLATE_BIOSYNTHESIS	-0.147054	-0.287752	-0.62891	0.531668	-0.662225	-0.594294	-0.589968	-0.534404	-0.547382	-0.439765	-0.637287	-0.580114	-0.575361	-0.416438	-0.641207	-0.18987	-0.559939	-0.619963	-0.576301	-0.504857	-0.552446	-0.600977	-0.600926	-0.306102	-0.636779	-0.531601	-0.595942	-0.565899	-0.502555	-0.667555	-0.596427	-0.544013	-0.562444	0.00675165	-0.562942	-0.579098	-0.218949	-0.627173	-0.334156	-0.334013	-0.0766709	-0.244198	-0.492266	-0.552322	-0.279132	-0.561082	-0.584919	-0.542437	-0.629989
KEGG_ALANINE_ASPARTATE_AND_GLUTAMATE_METABOLISM	-0.410475	-0.465849	-0.469097	0.59187	-0.412009	-0.446386	-0.422576	-0.355251	-0.610729	-0.556817	-0.466835	-0.41018	-0.451174	-0.563504	-0.374947	-0.242479	-0.443565	-0.388698	-0.384522	-0.158236	-0.26544	-0.644168	-0.372581	-0.259353	-0.474946	-0.388323	-0.354977	-0.517173	-0.281137	-0.53755	-0.488414	-0.37865	-0.201485	-0.323397	-0.374825	-0.410566	-0.184237	-0.251109	-0.0887754	-0.607712	-0.408279	-0.355686	-0.489487	-0.099931	-0.31129	-0.320352	-0.601192	-0.526868	-0.600928
KEGG_HISTIDINE_METABOLISM	-0.435099	-0.586084	-0.572645	0.483584	-0.554279	-0.410044	-0.713644	-0.477255	-0.363518	-0.520703	-0.654034	-0.558668	-0.648597	-0.395009	-0.527045	-0.277766	-0.503671	-0.280142	-0.239453	-0.0107454	-0.402458	-0.347498	-0.642313	-0.369492	-0.604682	-0.638521	-0.610709	-0.502717	-0.224754	-0.43861	-0.451196	-0.494264	-0.395016	-0.674306	-0.494361	-0.556707	-0.376007	-0.379297	-0.56585	-0.63151	-0.450855	-0.605785	-0.380821	-0.481052	-0.431597	-0.460556	-0.525305	-0.499169	-0.703985
KEGG_RETINOL_METABOLISM	-0.357285	-0.414698	-0.340829	0.211094	-0.412474	-0.313635	-0.498035	-0.333338	-0.357875	-0.274874	-0.484596	-0.232025	-0.230647	-0.207803	-0.414805	-0.306191	-0.0772433	-0.260754	-0.288982	-0.0522369	-0.345892	-0.0809321	-0.104553	-0.354166	-0.444869	-0.433821	-0.28781	-0.376494	-0.326699	-0.36852	-0.161355	-0.0649836	-0.375053	-0.0946211	-0.134294	-0.356338	-0.245545	-0.405528	0.0239411	-0.303642	-0.272398	-0.321985	-0.331451	-0.328624	-0.438697	-0.319065	-0.193238	-0.0691753	-0.450097
KEGG_GLYCEROLIPID_METABOLISM	-0.240339	-0.318101	-0.314323	0.159236	-0.241741	-0.232349	-0.236074	-0.19634	-0.346782	-0.193735	-0.215621	-0.119569	-0.322375	-0.0520712	-0.217769	-0.241098	-0.192026	0.0681987	-0.217102	-0.122706	-0.244171	-0.144469	-0.296719	-0.230385	-0.380868	-0.284229	-0.360187	-0.073642	-0.27625	-0.252486	-0.259689	-0.124769	-0.0672445	-0.358057	-0.125301	-0.271257	-0.263284	-0.206387	0.0428278	-0.183002	-0.302171	-0.35274	-0.0704537	-0.16743	-0.145375	-0.249171	-0.241136	-0.0287404	-0.240841
REACTOME_METABOLISM_OF_VITAMINS_AND_COFACTORS	-0.162933	-0.25703	-0.239397	0.184335	-0.204193	-0.0433946	-0.284803	-0.0719694	-0.24831	-0.318548	-0.306883	-0.299578	-0.361151	-0.179983	-0.344089	-0.0657813	-0.350703	-0.271249	-0.364578	-0.146707	-0.0854782	-0.240747	-0.231385	-0.259077	-0.264597	-0.250972	-0.313788	-0.133696	-0.316831	-0.392718	-0.310986	-0.444412	-0.221641	-0.270757	-0.207901	-0.276263	-0.0917689	-0.344126	-0.167896	-0.187337	-0.123605	-0.172141	-0.252164	-0.242957	-0.165245	-0.31093	-0.207245	-0.332281	-0.381324
KEGG_PHENYLALANINE_METABOLISM	-0.325352	-0.482616	-0.439969	0.562774	-0.445756	-0.425475	-0.524481	-0.288675	0.00776513	-0.464697	-0.595898	-0.47477	-0.594406	-0.430451	-0.387129	-0.04554	-0.398079	-0.414932	-0.522328	-0.211161	-0.334116	-0.348558	-0.464891	-0.193839	-0.539826	-0.517734	-0.279474	-0.510959	-0.361179	-0.511164	-0.347976	-0.280808	-0.147967	-0.407463	-0.331842	-0.423525	-0.192387	-0.460914	-0.570946	-0.553999	-0.350602	-0.340655	-0.60965	-0.385938	-0.0587727	-0.242051	-0.528491	-0.39211	-0.630308
KEGG_VALINE_LEUCINE_AND_ISOLEUCINE_BIOSYNTHESIS	-0.634158	-0.714627	-0.727305	0.399832	-0.611708	-0.441081	-0.664858	-0.625089	-0.601527	-0.615159	-0.462201	-0.645647	-0.46938	-0.236813	-0.483819	-0.0260862	-0.700696	-0.751543	-0.539686	-0.515581	-0.359361	-0.828318	-0.709086	-0.264298	-0.519065	-0.236237	-0.52025	-0.543907	-0.639851	-0.524353	-0.486615	-0.695938	-0.189092	-0.456225	-0.553224	-0.586647	-0.0980035	-0.509099	-0.47223	-0.531123	-0.0726883	-0.164836	-0.640309	-0.567324	-0.157582	-0.0273675	-0.709961	-0.457215	-0.781442
KEGG_LYSINE_DEGRADATION	-0.46938	-0.418903	-0.466587	0.495202	-0.460492	-0.433369	-0.508548	-0.341223	-0.498658	-0.445002	-0.552525	-0.420308	-0.397584	-0.357044	-0.431835	-0.105725	-0.423658	-0.48762	-0.524466	-0.223335	-0.26594	-0.504373	-0.421388	-0.361852	-0.460358	-0.448474	-0.476741	-0.560957	-0.464965	-0.398228	-0.42739	-0.511204	-0.26862	-0.417044	-0.490357	-0.390852	-0.237618	-0.439263	-0.459612	-0.58297	-0.436244	-0.418187	-0.437458	-0.470908	-0.356038	-0.380538	-0.483297	-0.420221	-0.47716
KEGG_ARGININE_AND_PROLINE_METABOLISM	-0.388616	-0.513723	-0.394831	0.483046	-0.483097	-0.522693	-0.546092	-0.204662	-0.589768	-0.512906	-0.51208	-0.345383	-0.413664	-0.452189	-0.375474	-0.105023	-0.318562	-0.521228	-0.221966	-0.21837	-0.10739	-0.383471	-0.338313	-0.293859	-0.416138	-0.54867	-0.57656	-0.417335	-0.462347	-0.526562	-0.446608	-0.488918	-0.317494	-0.539257	-0.502428	-0.451208	-0.223156	-0.512133	-0.235773	-0.497588	-0.269583	-0.328125	-0.422354	-0.282336	-0.263322	-0.354172	-0.457851	-0.435766	-0.622611
REACTOME_CHOLINE_CATABOLISM	-0.662837	-0.766576	-0.834476	0.67131	-0.841391	-0.840058	-0.829233	-0.698579	-0.871717	-0.830098	-0.795306	-0.75276	-0.832064	-0.76867	-0.768657	-0.886182	-0.663177	-0.58375	-0.662457	-0.268945	-0.762618	-0.602292	-0.88726	-0.31142	-0.770744	-0.8983	-0.892146	-0.511053	-0.899	-0.86791	-0.700926	-0.697564	-0.760817	-0.810176	-0.736582	-0.893922	-0.678213	-0.696346	-0.697818	-0.7162	-0.52944	-0.878696	-0.416995	-0.729343	-0.603822	-0.795521	-0.614978	-0.642812	-0.855475
KEGG_GLYCINE_SERINE_AND_THREONINE_METABOLISM	-0.729419	-0.71395	-0.759818	0.705324	-0.744351	-0.654561	-0.753522	-0.530451	-0.721526	-0.588352	-0.763753	-0.584623	-0.630408	-0.609331	-0.602106	-0.580122	-0.504321	-0.770273	-0.618985	-0.518815	-0.500982	-0.664134	-0.707276	-0.59486	-0.682563	-0.719748	-0.718946	-0.686488	-0.739379	-0.772278	-0.562542	-0.528846	-0.572885	-0.693096	-0.582014	-0.637217	-0.371833	-0.62106	-0.638659	-0.6526	-0.555909	-0.520951	-0.716133	-0.592456	-0.524122	-0.420215	-0.510078	-0.498524	-0.678749
KEGG_BETA_ALANINE_METABOLISM	-0.585015	-0.653407	-0.665383	0.548921	-0.46414	-0.577969	-0.634829	-0.562257	-0.694202	-0.690705	-0.582464	-0.637654	-0.649851	-0.590232	-0.379002	-0.330225	-0.593243	-0.651661	-0.603743	-0.254462	-0.371021	-0.617897	-0.557412	-0.554388	-0.618311	-0.68355	-0.719718	-0.519273	-0.678115	-0.688237	-0.560766	-0.619379	-0.368792	-0.598811	-0.540805	-0.71798	-0.462283	-0.710624	-0.585846	-0.688976	-0.366218	-0.662184	-0.519371	-0.531587	-0.499097	-0.64458	-0.522461	-0.583044	-0.665631
KEGG_TRYPTOPHAN_METABOLISM	-0.49546	-0.705033	-0.607671	0.710306	-0.473434	-0.507549	-0.628574	-0.463779	-0.654363	-0.449561	-0.635246	-0.536044	-0.609066	-0.556836	-0.482176	-0.26778	-0.544401	-0.597267	-0.440691	-0.0676376	-0.307727	-0.604165	-0.599948	-0.362005	-0.629724	-0.673101	-0.681257	-0.655232	-0.609127	-0.667569	-0.541367	-0.561193	-0.469755	-0.593396	-0.539824	-0.700306	-0.362816	-0.646296	-0.583184	-0.632245	-0.476961	-0.604805	-0.557403	-0.59387	-0.447848	-0.38673	-0.674255	-0.448605	-0.721207
KEGG_TYROSINE_METABOLISM	-0.340593	-0.443798	-0.45389	0.340685	-0.4879	-0.481131	-0.444798	-0.399735	-0.229224	-0.478198	-0.527951	-0.500906	-0.518728	-0.468848	-0.432219	-0.19761	-0.359706	-0.419355	-0.420491	-0.228646	-0.222382	-0.365787	-0.401407	-0.366303	-0.470674	-0.412877	-0.329353	-0.484274	-0.444319	-0.405948	-0.362814	-0.29405	-0.221019	-0.444102	-0.396856	-0.48144	-0.2223	-0.386834	-0.458208	-0.503063	-0.305306	-0.387221	-0.486375	-0.475858	-0.251089	-0.381234	-0.463076	-0.354392	-0.529682
REACTOME_MITOCHONDRIAL_FATTY_ACID_BETA_OXIDATION	-0.670573	-0.757906	-0.768281	0.669839	-0.583284	-0.58276	-0.726196	-0.516064	-0.738414	-0.504287	-0.729775	-0.697898	-0.733848	-0.643969	-0.603325	-0.552142	-0.651098	-0.621662	-0.588167	-0.353959	-0.520835	-0.674436	-0.771493	-0.346984	-0.755929	-0.736952	-0.638986	-0.674177	-0.718173	-0.734932	-0.686377	-0.676008	-0.373358	-0.638201	-0.690339	-0.705595	-0.0499606	-0.60186	-0.579389	-0.733987	-0.405974	-0.69127	-0.597855	-0.523171	-0.248405	-0.20804	-0.69104	-0.65186	-0.790765
KEGG_FATTY_ACID_METABOLISM	-0.733566	-0.691807	-0.666581	0.673436	-0.538833	-0.597465	-0.673624	-0.526041	-0.712177	-0.488688	-0.652249	-0.520609	-0.597825	-0.597298	-0.571567	-0.534268	-0.647257	-0.475702	-0.451062	-0.459941	-0.388295	-0.744166	-0.707403	-0.302418	-0.653212	-0.654915	-0.664665	-0.658679	-0.623718	-0.667314	-0.673842	-0.609991	-0.329103	-0.597279	-0.577224	-0.740861	-0.461446	-0.6442	-0.65621	-0.709621	-0.496377	-0.663424	-0.568145	-0.473261	-0.596704	-0.468078	-0.750204	-0.623503	-0.72502
KEGG_CITRATE_CYCLE_TCA_CYCLE	-0.654119	-0.776439	-0.70698	0.731355	-0.680193	-0.736979	-0.644351	-0.5837	-0.694159	-0.673262	-0.64214	-0.74372	-0.62937	-0.595819	-0.555984	-0.400529	-0.635953	-0.751774	-0.646001	-0.697405	-0.45307	-0.71883	-0.758146	-0.504641	-0.682991	-0.679933	-0.6869	-0.729204	-0.787589	-0.837985	-0.688024	-0.695353	-0.58355	-0.564385	-0.638862	-0.704414	-0.146573	-0.606364	-0.583686	-0.726259	-0.48648	-0.609362	-0.685941	-0.608277	-0.368315	-0.582161	-0.721746	-0.669322	-0.747409
KEGG_VALINE_LEUCINE_AND_ISOLEUCINE_DEGRADATION	-0.743489	-0.780348	-0.739843	0.728621	-0.623162	-0.668525	-0.704764	-0.608205	-0.781618	-0.621155	-0.700283	-0.670617	-0.70146	-0.593392	-0.585431	-0.496015	-0.642838	-0.668025	-0.562139	-0.416777	-0.588515	-0.772476	-0.780307	-0.43694	-0.725918	-0.676298	-0.728365	-0.754177	-0.722167	-0.756401	-0.640622	-0.673789	-0.477751	-0.69782	-0.672045	-0.756413	-0.464027	-0.704334	-0.721103	-0.714454	-0.52539	-0.655779	-0.677492	-0.660812	-0.542257	-0.548364	-0.731729	-0.602159	-0.801957
REACTOME_KETONE_BODY_METABOLISM	-0.630533	-0.621081	-0.635694	0.554277	-0.738584	-0.676192	-0.717773	-0.568845	-0.75625	-0.643925	-0.699665	-0.570279	-0.311885	-0.629255	-0.779091	-0.515765	-0.36703	-0.756289	-0.54957	-0.737791	-0.620066	-0.637466	-0.644257	-0.692379	-0.666375	-0.61643	-0.712973	-0.519178	-0.642394	-0.765907	-0.424134	-0.319112	-0.483186	-0.683616	-0.408211	-0.516723	-0.395346	-0.491844	-0.499652	-0.595719	-0.699125	-0.625891	-0.673645	-0.654526	-0.529057	-0.564813	-0.553952	-0.351671	-0.71029
KEGG_OXIDATIVE_PHOSPHORYLATION	-0.587855	-0.676339	-0.629335	0.624874	-0.628673	-0.630201	-0.606053	-0.622644	-0.65386	-0.644984	-0.612602	-0.687811	-0.503394	-0.578862	-0.54195	-0.526682	-0.552212	-0.64923	-0.585604	-0.608368	-0.543267	-0.54484	-0.648812	-0.538831	-0.664193	-0.650087	-0.701355	-0.544024	-0.679781	-0.656847	-0.583489	-0.608349	-0.479587	-0.572007	-0.549991	-0.708568	-0.680072	-0.653162	-0.569053	-0.426255	-0.634562	-0.606056	-0.667921	-0.487298	-0.654701	-0.608559	-0.596359	-0.579676	-0.660472
REACTOME_GLUCOSE_METABOLISM	-0.0660252	-0.0190017	0.0806169	-0.211829	0.0981974	0.0900298	0.139145	-0.0486978	0.223969	-0.0138282	-0.0330068	-0.117993	-0.548334	-0.0233644	0.167513	0.355738	-0.592647	-0.0308407	-0.464425	0.329348	-0.125578	-0.274091	0.195603	0.343021	0.030342	-0.0116169	0.179788	-0.118078	0.0704232	0.117734	-0.552374	-0.558961	0.246016	0.322099	-0.447191	-0.0536877	0.379368	0.168515	0.124174	-0.397396	0.31105	0.00190335	0.278425	0.197002	0.192362	-0.137712	-0.493851	-0.61265	-0.224481
REACTOME_TRIGLYCERIDE_CATABOLISM	-0.00355737	-0.32842	0.200199	-0.375437	0.148955	-0.0324616	0.239623	0.0931023	0.0670822	-0.269127	-0.0350599	0.273645	-0.385596	-0.0479146	-0.00552754	0.376254	-0.45484	-0.410275	-0.335175	-0.180521	-0.155259	-0.0197078	-0.265517	0.0506234	-0.197078	0.0986578	-0.133551	-0.238618	0.264354	0.258049	-0.0474111	-0.243849	0.376346	0.0806039	-0.128484	0.0340193	0.387738	0.270498	-0.226648	-0.509218	0.447063	0.0810941	0.323675	-0.041456	0.303928	0.023468	-0.16159	-0.307746	0.174961
REACTOME_METABOLISM_OF_POLYAMINES	0.0068747	-0.276558	0.201151	0.0146198	0.343431	-0.0837489	0.459746	-0.513529	0.0793623	-0.294302	0.243231	-0.23534	-0.625782	-0.342673	0.399574	0.439825	-0.647253	0.0558539	-0.440302	0.198641	0.21995	-0.586407	0.381652	0.522422	0.0645249	0.321325	0.382594	-0.328891	0.384268	0.231594	-0.521125	-0.572389	0.50543	0.396153	-0.607823	-0.479274	0.627957	0.361017	-0.572077	-0.66096	0.627197	-0.197752	0.371488	-0.132688	0.510925	-0.350167	-0.64473	-0.664386	-0.570011
KEGG_RIBOFLAVIN_METABOLISM	-0.308892	-0.437487	-0.278671	-0.40201	-0.195242	0.128056	-0.0657289	-0.138879	-0.363771	-0.275115	-0.402906	0.00314326	0.0227651	-0.0252019	-0.231802	0.217778	-0.375052	-0.0851585	-0.299333	0.0721315	0.148185	-0.106838	0.282378	0.3299	0.0181866	0.215448	-0.0700215	-0.186969	-0.0622843	0.0557752	-0.417354	-0.39891	0.189545	0.292244	-0.353889	-0.366579	0.149714	0.195567	0.339796	-0.0776126	0.0922904	-0.113257	-0.207262	0.0140113	0.254576	0.0274572	-0.321915	-0.347022	0.286185
REACTOME_METABOLISM_OF_NITRIC_OXIDE_ENOS_ACTIVATION_AND_REGULATION	-0.35491	-0.0933439	-0.192205	0.168863	-0.246735	0.230818	-0.0513325	-0.399777	-0.0268031	-0.0678909	-0.190626	-0.0340042	-0.535336	0.0499124	-0.293527	-0.160255	-0.676935	0.209075	-0.345569	0.115764	-0.453295	-0.281611	-0.18362	0.540366	-0.430186	-0.119242	0.272112	-0.739334	0.541262	0.423964	-0.548838	-0.661032	0.140054	-0.135241	-0.695912	-0.566515	0.0793429	0.19296	-0.678534	-0.539152	0.0950183	-0.677807	0.210288	-0.452883	0.156049	0.051932	-0.164531	-0.680395	-0.2879
REACTOME_SYNTHESIS_OF_VERY_LONG_CHAIN_FATTY_ACYL_COAS	0.0358525	0.169319	0.194555	0.470967	0.0522207	0.192985	0.124847	0.528855	0.074199	0.157834	0.184844	0.160059	0.0995842	0.0672006	-0.128521	-0.262948	-0.1302	0.291393	0.281609	-0.160577	0.119961	0.0258496	-0.184449	0.312566	0.338509	-0.0191027	-0.075308	0.407817	0.0235192	-0.0447446	-0.181327	-0.178909	0.237944	0.343427	0.484477	0.0780151	-0.0175415	-0.0279848	0.415479	0.00194901	0.100436	0.124561	0.0015762	0.317038	0.147483	0.0368146	0.0829476	-0.106698	-0.0484502
REACTOME_METABOLISM_OF_CARBOHYDRATES	-0.0128742	-0.09734	0.0753089	-0.0633079	0.0578902	-0.0165687	-0.0061818	-0.0468827	0.109795	-0.109361	-0.056118	-0.0893291	-0.306806	-0.00582763	0.0201778	0.213968	-0.362489	-0.029995	-0.299799	0.211333	-0.0126289	-0.114974	0.0311127	0.00575181	-0.0169669	-0.0663113	0.0821912	-0.102553	0.0469445	-0.0921325	-0.32913	-0.343984	0.148328	0.114496	-0.211129	-0.136604	0.170073	-0.00665591	0.107043	-0.229785	0.210633	0.00725301	0.116011	0.0996885	0.101149	-0.147443	-0.210594	-0.396962	-0.100659
REACTOME_TRIGLYCERIDE_METABOLISM	0.127059	-0.311271	0.0753992	-0.314955	0.0505822	-0.109863	-0.0168597	-0.0491828	-0.069234	-0.228719	-0.210513	0.232467	-0.329562	-0.123554	-0.127961	0.0735212	-0.391907	-0.395053	-0.37592	-0.0984434	-0.278171	-0.110018	-0.193845	-0.0407518	-0.299934	0.029472	-0.118814	-0.287355	0.0936327	0.11661	-0.0894623	-0.169065	0.175863	0.0970713	-0.168191	-0.0591721	0.220461	0.19024	-0.206778	-0.351425	0.15751	-0.089399	0.10174	0.0270425	0.250056	-0.0919251	-0.249396	-0.278601	-0.029036
REACTOME_VITAMIN_C_ASCORBATE_METABOLISM	-0.467307	-0.678761	-0.486567	-0.0216545	0.0866497	0.219562	-0.470481	0.117043	0.0584986	-0.290048	-0.0449189	-0.459371	-0.374303	0.228326	0.0510313	0.39908	-0.233335	0.409641	-0.364473	0.198401	0.467168	-0.00303747	0.550864	0.303842	0.0189018	0.138597	-0.281889	0.0791661	0.247105	0.113351	-0.565816	-0.555531	-0.420229	-0.216573	0.193674	0.177872	0.395217	-0.392178	0.0740905	0.441403	0.52406	0.234578	0.276328	0.400116	0.161486	0.0025273	0.250005	-0.0193649	-0.429845
REACTOME_PHOSPHOLIPID_METABOLISM	-0.220042	-0.264341	-0.140755	-0.171012	-0.0528024	-0.231021	-0.164208	-0.266222	-0.221743	-0.385498	-0.143351	-0.253553	-0.173282	-0.207703	-0.0707887	-0.143753	-0.361915	-0.0380155	-0.269516	-0.154278	-0.184197	-0.251391	-0.0884823	0.142769	-0.0985677	0.0798094	0.024917	0.112747	-0.0446825	0.0187247	-0.371273	-0.315274	-0.11912	0.159341	-0.0646497	-0.101052	0.125349	0.0220529	0.113963	-0.0568506	-0.0553782	-0.194449	-0.0651771	0.1552	-0.0296186	0.0650143	-0.222779	-0.327977	-0.0771477
REACTOME_NICOTINATE_METABOLISM	0.149222	0.0670247	0.0116129	0.0521921	-0.0497843	0.207786	-0.062292	0.193592	0.0962086	-0.0891715	0.0918206	-0.0655114	-0.190122	-0.0159575	0.000120486	0.172186	-0.331622	0.101643	0.197203	-0.187664	0.24092	-0.0104217	-0.0927249	0.0328055	-0.0994474	-0.0416315	-0.344076	0.0819182	-0.355478	0.0797645	-0.380105	-0.455922	0.0165528	0.0570107	0.0168877	-0.323122	0.0566872	-0.220798	0.020817	0.180532	-0.0187132	-0.0637252	0.0119965	0.198353	0.0863498	-0.151052	-0.316055	-0.400969	-0.175963
REACTOME_METABOLISM_OF_NUCLEOTIDES	0.0716357	-0.180545	-0.00025435	0.0334055	-0.130641	-0.273229	0.0703009	-0.133186	-0.0985735	-0.322253	-0.0494882	-0.305021	-0.256078	-0.326007	-0.0331633	0.211648	-0.483049	-0.0911734	-0.309005	0.0994548	-0.0110461	-0.314306	0.0066961	0.0245908	0.0928596	0.191525	0.11644	-0.0462467	0.0162254	-0.100615	-0.390651	-0.252056	0.263461	0.160634	-0.260313	-0.177789	0.219177	0.255499	-0.30568	-0.526644	0.207248	0.0303023	-0.0866793	0.0138788	0.150779	-0.111423	-0.470276	-0.462342	-0.321064
REACTOME_CHOLESTEROL_BIOSYNTHESIS	-0.165547	0.0719738	0.409971	0.121865	-0.113803	-0.109594	-0.26801	-0.234057	-0.317406	-0.264948	0.157684	-0.336538	-0.214422	-0.170853	0.105557	-0.0463586	-0.373106	0.0303878	-0.106004	0.131641	0.033931	-0.269966	0.127375	-0.0697241	-0.0909735	-0.0516989	-0.115157	-0.120958	0.115572	-0.0440757	-0.450877	-0.273834	0.19202	-0.125605	-0.185705	-0.042533	0.206207	-0.298152	0.380454	-0.0867144	0.128885	-0.132838	-0.0970505	0.165296	-0.0137652	0.247524	-0.566724	-0.386595	-0.299704
REACTOME_PURINE_CATABOLISM	-0.0340885	-0.388625	-0.422305	0.0954724	-0.230108	-0.254747	0.0145766	-0.50092	-0.105713	-0.461195	-0.100416	-0.480253	-0.377483	-0.343499	-0.27982	0.444324	-0.581648	0.123436	-0.295405	0.403125	-0.222303	-0.404523	-0.129312	-0.259182	0.227015	0.27785	0.17408	-0.394927	0.233586	-0.207606	-0.455204	-0.393624	0.12511	-0.00126615	-0.531332	-0.301576	0.0899584	0.0709659	-0.367653	-0.545019	0.174791	-0.12942	-0.128526	0.136705	-0.0413991	-0.356207	-0.494424	-0.506117	-0.410524
REACTOME_PYRIMIDINE_CATABOLISM	-0.132538	-0.0324946	-0.458727	0.248972	0.00519266	-0.254517	-0.0439578	-0.304016	-0.264415	-0.293832	-0.0350881	-0.565876	-0.129288	-0.34515	-0.0538662	-0.304855	-0.41509	-0.354	0.092608	-0.0110218	0.0916694	-0.275063	0.0534794	-0.233815	0.209846	0.124721	-0.207363	-0.144114	-0.203012	-0.337643	0.0157387	0.0616348	0.48302	-0.0923398	-0.0984348	-0.35764	0.0941699	0.0704333	-0.381454	-0.444123	0.283799	0.258047	0.058724	-0.238538	0.189857	0.190075	-0.411071	-0.436682	-0.164472
REACTOME_NUCLEOBASE_CATABOLISM	-0.0176878	-0.203026	-0.271373	0.150226	-0.0827249	-0.176173	0.0398175	-0.215043	-0.0946224	-0.179828	-0.0507883	-0.319651	-0.184441	-0.265677	-0.134968	0.158405	-0.425657	-0.0646673	-0.0283077	0.232644	-0.0133425	-0.270103	0.00698402	-0.15978	0.163568	0.0950945	-0.0204941	-0.180523	0.108697	-0.190427	-0.32968	-0.292985	0.292836	-0.0322766	-0.312269	-0.228538	0.0527247	0.0812279	-0.371792	-0.404295	0.0576217	0.000794883	-0.0583461	0.0752011	0.00283831	-0.171038	-0.388404	-0.43147	-0.278686
KEGG_GALACTOSE_METABOLISM	0.177552	-0.190369	-0.139132	0.0458035	-0.154323	-0.235038	-0.00230891	-0.257712	-0.177237	-0.534837	-0.255606	-0.254422	-0.388232	0.00579967	-0.0620666	0.286362	-0.465181	0.0775455	-0.456999	0.0591441	0.050369	-0.101988	0.110276	0.117787	0.0615938	-0.092537	0.372088	-0.162575	0.080414	-0.402758	-0.404286	-0.54062	0.131726	0.277303	-0.228317	-0.265176	0.06037	-0.0849069	0.157705	-0.587762	0.038064	-0.0124983	-0.225073	0.180895	0.107252	-0.392157	-0.606687	-0.563611	-0.280411
REACTOME_FATTY_ACYL_COA_BIOSYNTHESIS	0.0127894	0.0483701	0.167999	0.20798	-0.0194567	0.00957202	-0.0429303	0.397895	-0.108996	-0.0559696	-0.00870128	0.0436504	-0.133526	-0.106213	-0.100842	-0.147636	-0.261227	0.0692203	-0.067901	-0.138801	-0.00403369	0.0270949	-0.121366	0.145902	0.163466	-0.0268491	0.14604	0.148687	-0.0238347	-0.138755	-0.324929	-0.292135	0.202141	0.238038	0.18646	0.111721	-0.0515088	-0.042471	0.213751	-0.195145	0.0432483	-0.0904268	-0.0186168	0.169721	0.0601012	-0.039522	-0.0784278	-0.265838	-0.0353037
REACTOME_METABOLISM_OF_STEROIDS	-0.00804409	0.0439669	0.032472	-0.0368253	-0.0373694	-0.0342698	-0.11685	-0.0745928	-0.106555	-0.251609	-0.072907	-0.114258	-0.170978	-0.166347	-0.0702839	-0.0821189	-0.240217	-0.0466836	-0.186515	0.0450146	0.00026962	-0.166623	-0.0418343	-0.137552	-0.0812926	-0.118256	-0.0698195	0.00409899	-0.0700074	-0.235687	-0.215731	-0.186319	0.0329187	-0.0877499	-0.150422	-0.0368486	0.050144	-0.0952807	-0.00739055	-0.222209	0.0942336	0.0423382	-0.124244	-0.00497111	0.0273626	0.0663198	-0.226633	-0.259912	-0.118338
REACTOME_VITAMIN_B5_PANTOTHENATE_METABOLISM	-0.00124308	-0.459777	-0.466675	-0.17623	-0.0850764	-0.119601	-0.130796	0.109945	-0.498131	-0.253866	-0.434219	-0.446393	-0.442332	-0.309242	-0.0993016	0.252596	-0.4514	-0.210079	-0.556523	0.117317	0.0307622	-0.159336	0.18812	-0.197372	0.0182394	-0.240875	0.303037	-0.219387	0.257725	0.0938141	-0.462827	-0.599275	-0.151669	0.401121	-0.333854	-0.366934	-0.0855032	-0.0769926	-0.0802183	-0.191689	-0.18134	-0.232536	-0.165575	-0.0716946	0.0458175	-0.3104	-0.610722	-0.438694	-0.150153
REACTOME_COBALAMIN_CBL_VITAMIN_B12_TRANSPORT_AND_METABOLISM	-0.490613	-0.0176989	-0.450134	0.145277	-0.137866	0.218572	-0.304569	-0.0828236	0.113627	-0.284827	-0.341323	-0.310624	-0.477012	-0.308963	-0.657395	-0.143654	-0.235409	-0.555286	-0.348534	-0.203722	-0.308992	-0.365111	-0.456803	-0.133796	-0.484098	-0.28151	0.0682674	0.0850612	-0.476168	-0.651787	-0.401631	-0.366484	-0.43969	0.0780423	-0.196053	0.00741256	-0.243823	-0.0622999	0.0370968	-0.314737	-0.477883	-0.223551	-0.156092	-0.480646	-0.291559	0.00154901	-0.00179969	-0.291279	-0.489307
REACTOME_VITAMIN_D_CALCIFEROL_METABOLISM	-0.157924	0.0464657	-0.293837	0.273063	-0.205631	0.0746333	-0.344771	-0.397777	-0.113232	-0.464284	-0.0138945	-0.398878	0.0610636	-0.131339	-0.227026	-0.261038	-0.366057	-0.41365	-0.317102	-0.161258	0.0272926	-0.25205	-0.50512	-0.46842	-0.262209	-0.455002	-0.395738	0.0264763	-0.492246	-0.50275	-0.00964837	-0.306897	-0.149055	-0.574695	-0.248561	-0.443191	-0.419425	-0.415904	-0.347136	-0.379766	-0.077933	-0.0141598	-0.368034	-0.306222	-0.427956	-0.303722	-0.460741	-0.391156	-0.461887
REACTOME_SPHINGOLIPID_METABOLISM	-0.00607758	-0.218029	-0.174871	-0.0335767	-0.0588658	-0.310743	-0.183545	-0.283149	-0.107571	-0.249575	-0.215014	-0.215579	-0.404812	-0.187013	-0.150646	-0.0063713	-0.364299	-0.130257	-0.160571	0.00530234	-0.174868	-0.154803	-0.104712	-0.0294093	-0.0181507	0.034097	-0.135561	-0.177459	-0.302287	-0.18996	-0.379405	-0.368422	-0.198848	0.280416	-0.373212	-0.304734	-0.0648657	-0.121327	0.298903	0.0894626	-0.179251	-0.257853	-0.28612	0.249114	-0.0197221	0.0281642	-0.310232	-0.360764	-0.302181
REACTOME_VITAMIN_B2_RIBOFLAVIN_METABOLISM	-0.645991	-0.572343	-0.723549	-0.644425	-0.565406	-0.604393	-0.550794	-0.578212	-0.489018	-0.674333	-0.710462	-0.267926	0.463845	-0.306561	-0.734105	0.481407	-0.527811	-0.678477	-0.593087	-0.00614246	-0.0226067	-0.189428	-0.276658	-0.316209	-0.436304	0.1152	-0.581268	0.237969	-0.752581	-0.723514	-0.553474	-0.562047	0.210368	0.0717467	-0.295436	-0.460489	-0.0990694	-0.450506	0.254306	0.119166	-0.693109	-0.173715	-0.810282	-0.322745	0.544658	-0.43404	0.0203994	-0.410529	0.320351
KEGG_GLYCOLYSIS_GLUCONEOGENESIS	-0.318962	-0.254055	-0.180514	0.071058	-0.0673675	0.0130617	-0.283572	-0.122868	-0.0158134	-0.269119	-0.445212	-0.0295113	-0.567425	-0.0334268	-0.258391	0.0661468	-0.522474	0.0795714	-0.523543	0.146979	-0.210282	-0.259036	-0.0432822	0.0918246	-0.206265	-0.415249	0.018009	-0.560758	0.0432333	-0.256391	-0.513325	-0.373346	-0.0203939	-0.0824281	-0.456627	-0.409744	0.0768313	-0.116613	-0.188739	-0.640404	-0.0536217	-0.258533	-0.0326278	-0.100267	0.0208669	-0.522872	-0.524996	-0.569802	-0.527958
REACTOME_METABOLISM_OF_PORPHYRINS	-0.116227	-0.32631	-0.352289	-0.0490319	-0.295457	-0.406094	-0.116668	-0.308632	-0.286509	-0.0354829	-0.256862	-0.188572	-0.369098	-0.412849	0.00416983	-0.101321	-0.296464	-0.299436	-0.168496	0.0213954	0.0988909	-0.246279	-0.225857	0.0136113	-0.363979	-0.228452	-0.560106	-0.306174	-0.417392	-0.486171	-0.325131	-0.432581	0.0464167	-0.168718	-0.142639	-0.119268	-0.0391461	-0.251142	-0.226072	-0.357636	-0.150568	-0.0230119	-0.193114	0.0580029	0.044058	0.136647	-0.138574	-0.33384	-0.262888
REACTOME_METABOLISM_OF_FAT_SOLUBLE_VITAMINS	-0.055206	-0.128828	0.127058	0.0912978	-0.306302	0.266466	-0.381616	0.0872233	-0.113164	-0.396936	-0.179719	-0.20293	-0.383665	0.252035	-0.346977	-0.0654592	-0.171916	-0.124695	-0.370994	-0.271909	0.0066916	-0.0445646	-0.239255	-0.480299	-0.410844	-0.409225	-0.459932	0.0125487	-0.201849	-0.519886	0.14676	-0.306192	-0.22339	-0.493593	0.105152	-0.151278	-0.165236	-0.545623	-0.247085	-0.0360844	-0.288178	-0.0388374	-0.244375	-0.348346	-0.409765	-0.509486	0.222483	-0.0288401	-0.202978
REACTOME_HYALURONAN_METABOLISM	0.482937	0.00580196	0.263439	0.266328	-0.413358	-0.33446	-0.0639821	-0.144428	-0.310247	0.0848065	0.0204597	-0.257968	0.0563495	-0.204808	0.125638	0.0307879	-0.0187222	-0.336627	-0.366654	-0.152468	-0.137847	-0.211559	-0.263418	-0.541447	-0.151201	0.0129557	-0.278176	0.184237	-0.195776	-0.529498	-0.173737	-0.0568333	-0.0143233	-0.0733672	-0.0329901	-0.312464	-0.172875	-0.184473	0.450652	0.412501	0.197091	0.0313944	-0.367792	-0.0985862	0.019586	-0.0307308	-0.406542	-0.137262	0.0659383
REACTOME_DEFECTS_IN_COBALAMIN_B12_METABOLISM	-0.666771	-0.351576	-0.699566	0.141772	-0.2998	0.223438	-0.464029	-0.338666	-0.0363058	-0.322631	-0.541884	-0.522804	-0.599405	-0.451045	-0.726373	-0.145407	-0.397224	-0.673031	-0.432824	-0.0663887	-0.428813	-0.531954	-0.438918	-0.010356	-0.663017	-0.341941	-0.175229	-0.322066	-0.500682	-0.675651	-0.447841	-0.443939	-0.365173	0.159784	-0.172637	-0.37976	-0.441462	-0.0774171	-0.269624	-0.485516	-0.439065	-0.401687	-0.138604	-0.602631	-0.325721	0.0157764	-0.292248	-0.376399	-0.604071
KEGG_PANTOTHENATE_AND_COA_BIOSYNTHESIS	-0.0755011	-0.551684	-0.445217	-0.0860058	0.0207591	-0.0520952	-0.143789	-0.00798758	-0.52391	-0.379365	-0.153186	-0.527457	-0.559114	-0.305515	-0.139726	-0.211435	-0.511129	-0.517515	-0.237508	0.138463	-0.0780345	-0.405348	-0.172111	-0.370313	-0.0509903	-0.269854	0.055313	-0.162539	-0.00747571	0.0315229	-0.435522	-0.610221	0.0914862	0.128541	-0.219568	-0.462924	-0.342859	-0.184505	-0.0870441	-0.272253	-0.225482	-0.0965904	-0.242559	0.0825998	-0.0693816	-0.444227	-0.630079	-0.356206	-0.119871
KEGG_PORPHYRIN_AND_CHLOROPHYLL_METABOLISM	-0.137626	-0.421694	-0.269867	0.109692	-0.162382	-0.216301	-0.352327	-0.246529	-0.321486	-0.0434255	-0.223124	-0.127617	-0.298921	-0.369662	0.00592319	-0.00312398	-0.349224	-0.475395	-0.26183	0.0512489	0.0613187	-0.243937	-0.0379814	-0.311814	-0.190321	-0.243428	-0.435833	-0.311927	-0.453759	-0.423078	-0.37954	-0.430278	-0.145966	0.052412	-0.155361	-0.143054	-0.0298405	-0.324985	0.12483	-0.396255	0.0536851	-0.0360802	-0.253815	-0.147734	-0.00889943	-0.0999411	-0.302185	-0.399372	-0.302702
KEGG_PRIMARY_BILE_ACID_BIOSYNTHESIS	-0.135239	-0.429827	-0.434605	0.402467	-0.317127	-0.395299	-0.268504	-0.220258	-0.405473	-0.386557	-0.158807	-0.304445	-0.24485	-0.349976	-0.241358	-0.210616	-0.0441088	-0.325458	-0.306319	0.195214	-0.219855	-0.076947	-0.221097	-0.192999	-0.409062	-0.0585444	-0.412706	-0.319462	-0.585114	-0.449574	-0.151538	-0.120922	-0.327537	-0.269141	-0.171728	-0.0986785	-0.0759566	-0.0446492	0.412815	-0.147446	-0.287499	-0.351133	-0.226985	0.0647239	-0.16515	0.171341	-0.145541	-0.0640185	-0.333762
KEGG_NICOTINATE_AND_NICOTINAMIDE_METABOLISM	-0.279745	-0.401905	-0.280294	0.131833	-0.29727	-0.0780239	-0.283687	-0.289663	-0.258415	-0.36923	-0.183754	-0.536353	-0.340428	-0.314788	-0.246006	0.0592346	-0.464046	-0.170964	-0.190858	-0.244574	-0.119497	-0.423001	-0.179984	-0.0313097	-0.0918245	-0.124849	-0.2575	-0.224274	-0.222534	-0.0504962	-0.55539	-0.472118	0.0736759	0.0241697	-0.0963928	-0.257161	0.242988	-0.210594	-0.0620842	-0.0589647	-0.150031	-0.164588	-0.144104	0.0144552	0.0561243	-0.306261	-0.586773	-0.538089	-0.261679
REACTOME_BILE_ACID_AND_BILE_SALT_METABOLISM	-0.092925	-0.111277	-0.207469	-0.0288553	-0.143247	-0.234119	-0.123944	-0.175216	-0.0958508	-0.369385	-0.298106	-0.107114	-0.224531	-0.293362	-0.213846	-0.0497589	-0.176364	-0.097351	-0.362048	0.00738389	-0.166202	-0.0459912	-0.234599	-0.169214	-0.302141	-0.158839	-0.186514	-0.173951	-0.156287	-0.370314	-0.159039	-0.213488	-0.204604	-0.163039	-0.124712	-0.174264	-0.0164074	0.00972068	-0.0704294	-0.103121	0.0601412	-0.208153	-0.10832	-0.0102536	0.0647271	0.0301771	-0.110526	-0.179558	-0.285181
REACTOME_METABOLISM_OF_AMINE_DERIVED_HORMONES	-0.232811	-0.152678	-0.209809	0.198402	-0.334828	-0.0858775	-0.431404	-0.01165	-0.327314	-0.11723	-0.306239	-0.10991	0.00870442	-0.0425918	-0.411377	-0.364549	0.359441	-0.229322	-0.101119	0.0515371	-0.106781	0.080859	-0.235171	-0.448768	-0.230441	-0.356101	-0.311421	-0.0832739	-0.271515	-0.344378	0.295197	0.323455	-0.111552	-0.505002	0.176693	-0.161835	-0.501039	-0.51403	-0.0682309	-0.0319898	-0.480113	-0.195537	-0.272173	-0.368832	-0.397175	-0.399816	0.0613911	0.35193	-0.235355
REACTOME_HISTIDINE_CATABOLISM	-0.738812	-0.730112	-0.65818	0.570493	-0.499081	-0.333758	-0.750384	-0.628185	-0.236493	-0.483197	-0.599261	-0.685374	-0.639535	-0.642272	-0.738409	-0.8118	-0.317335	-0.165294	-0.657257	-0.33535	-0.58299	-0.494247	-0.544151	-0.319876	-0.696569	-0.681608	-0.734973	-0.454055	-0.16093	-0.514247	-0.374568	-0.342618	-0.610962	-0.643264	-0.458893	-0.314696	-0.569478	-0.0906559	-0.546145	-0.588757	-0.688213	-0.761996	-0.046016	-0.397915	-0.423761	-0.394846	-0.523058	-0.29376	-0.620279
REACTOME_GLUTAMATE_AND_GLUTAMINE_METABOLISM	-0.196739	-0.58462	-0.260651	0.588703	-0.211339	-0.6093	-0.221074	0.138188	-0.537242	-0.609286	-0.274123	-0.11072	-0.398387	-0.623892	-0.121028	0.560797	-0.312581	-0.621747	0.0832616	-0.338189	-0.136958	-0.514586	-0.271647	0.0939644	-0.173205	-0.340304	-0.626851	-0.3215	-0.765121	-0.751085	-0.364038	-0.546378	-0.214558	-0.290954	-0.462963	-0.0539729	0.409307	-0.531214	0.391841	-0.485825	0.355334	0.00108774	-0.724211	0.0104851	0.0645389	-0.0760517	-0.508023	-0.453451	-0.694456
REACTOME_METABOLISM_OF_AMINO_ACIDS_AND_DERIVATIVES	-0.246204	-0.254615	-0.118874	0.191537	-0.161746	-0.215686	-0.168619	-0.205532	-0.208629	-0.361248	-0.224223	-0.238531	-0.423721	-0.219054	-0.0498115	0.00318054	-0.547762	-0.230178	-0.347346	0.0147181	-0.05453	-0.386099	-0.0840905	-0.0121242	-0.152471	-0.188779	-0.15387	-0.427047	-0.16142	-0.326393	-0.495863	-0.565506	0.0193915	-0.150597	-0.562013	-0.269262	0.084916	-0.126229	-0.413299	-0.581131	0.0397742	-0.207813	-0.111943	-0.286105	0.00798909	-0.219191	-0.550666	-0.570904	-0.538192
KEGG_PPAR_SIGNALING_PATHWAY	-0.210605	-0.285586	-0.247721	0.356686	-0.332292	-0.22442	-0.441089	-0.166396	-0.395478	-0.19435	-0.334527	-0.193906	-0.302044	-0.131386	-0.425894	-0.287101	-0.259899	-0.0235701	-0.225964	-0.275464	-0.149814	-0.207715	-0.45554	-0.337854	-0.37386	-0.375961	-0.499576	-0.130201	-0.111099	-0.364567	-0.205497	-0.276632	-0.181034	-0.306165	-0.107705	-0.305575	-0.325715	-0.417152	-0.23186	-0.409567	-0.191798	-0.31561	-0.230719	-0.27964	-0.323254	-0.331315	-0.222065	-0.106474	-0.363017
REACTOME_PHENYLALANINE_METABOLISM	-0.329168	-0.368553	-0.365285	0.671122	-0.405633	-0.172013	-0.355998	-0.439251	-0.17973	-0.499341	-0.571929	-0.737423	-0.0274966	-0.513599	-0.314669	0.0126406	-0.223	-0.464737	-0.388488	0.0730452	-0.633034	-0.704273	-0.276432	-0.117089	-0.729451	-0.47959	-0.45394	-0.48351	-0.0682503	-0.580408	-0.28577	-0.287552	-0.195795	-0.207648	-0.332692	-0.384656	-0.519403	-0.202882	-0.177247	-0.391339	-0.608967	-0.490132	-0.706655	0.0343606	-0.445928	-0.179191	-0.745543	-0.221668	-0.681284
REACTOME_SERINE_BIOSYNTHESIS	-0.343405	-0.292402	-0.455	0.564974	-0.336922	-0.389334	-0.127165	-0.173129	-0.466452	-0.551308	-0.579134	-0.130118	-0.241256	-0.255492	0.0536847	-0.162734	-0.365146	-0.533783	-0.279489	-0.26906	-0.316172	-0.545476	-0.241726	-0.311458	-0.0390435	-0.294341	-0.237393	-0.550939	-0.604781	-0.327807	-0.407816	-0.26239	0.222541	-0.253494	-0.180773	-0.231807	-0.299852	-0.664595	-0.0806348	-0.0513207	-0.383111	-0.390905	-0.388667	-0.164023	-0.505526	-0.46271	-0.174011	-0.350719	-0.432401
REACTOME_PYRUVATE_METABOLISM	-0.368613	-0.414258	-0.291433	0.431492	-0.501928	-0.348195	-0.434403	-0.232148	-0.414766	-0.0982754	-0.491155	-0.416591	-0.278783	-0.422321	-0.246418	0.059807	-0.45021	-0.259518	-0.234717	-0.459909	0.0964063	-0.310589	-0.391219	-0.00755383	-0.428778	-0.384058	-0.284913	-0.544315	-0.285184	-0.453376	-0.515904	-0.396562	-0.138116	-0.146278	-0.421051	-0.242362	0.360289	-0.284604	-0.0611789	-0.527296	0.429683	-0.29216	-0.0626897	-0.279885	-0.278733	-0.283762	-0.347785	-0.549037	-0.416217
REACTOME_METABOLISM_OF_WATER_SOLUBLE_VITAMINS_AND_COFACTORS	-0.199306	-0.301207	-0.380339	0.11996	-0.122738	-0.0540447	-0.244662	-0.0564993	-0.219539	-0.264998	-0.289111	-0.273164	-0.347384	-0.298975	-0.277329	-0.0248938	-0.397546	-0.283666	-0.331608	-0.0339659	-0.0157099	-0.268052	-0.193417	-0.118081	-0.210781	-0.16096	-0.187183	-0.128622	-0.317835	-0.285113	-0.470565	-0.466535	-0.184554	-0.151316	-0.27209	-0.265969	-0.0338391	-0.226365	-0.0723105	-0.152384	-0.0768023	-0.176184	-0.177214	-0.158766	-0.0732873	-0.234869	-0.33341	-0.422462	-0.402227
REACTOME_TRYPTOPHAN_CATABOLISM	-0.035364	-0.455101	-0.124031	0.64224	-0.316553	-0.261862	-0.360744	-0.132218	-0.306989	-0.285075	-0.125975	-0.428586	-0.259543	-0.616862	-0.513326	-0.419902	-0.564723	-0.456358	-0.519838	-0.236662	0.0766518	-0.382573	0.0617666	-0.434785	-0.418622	-0.461647	-0.766198	-0.459827	-0.325016	-0.56758	-0.499578	-0.52608	-0.589836	-0.538839	-0.573158	-0.411548	-0.150109	-0.607427	-0.468817	-0.533154	-0.475433	-0.207534	-0.34574	-0.444866	-0.383681	-0.332017	-0.637483	-0.238277	-0.665717
REACTOME_CARNITINE_METABOLISM	-0.260987	-0.358741	-0.353973	-0.0394349	-0.52603	-0.463677	-0.488013	-0.363437	-0.626322	-0.199824	-0.488082	-0.265258	0.304879	-0.417956	-0.401364	0.304717	-0.012307	-0.207808	-0.10986	-0.0970806	0.0424247	-0.343171	0.0539852	0.144636	-0.439462	-0.442402	-0.161574	-0.14015	-0.357964	-0.499162	-0.285671	-0.144131	-0.326611	0.0123687	-0.195349	-0.375428	-0.326082	-0.291278	0.0182737	-0.168781	-0.293983	-0.464576	-0.338006	-0.116481	-0.333122	-0.439725	-0.357615	-0.244372	-0.492328
REACTOME_FATTY_ACIDS	-0.424285	-0.366146	-0.340767	0.556827	-0.231333	-0.302375	-0.457143	-0.258221	-0.259507	-0.31069	-0.292277	-0.289443	-0.123402	-0.216159	-0.341763	-0.29752	0.151608	-0.403893	-0.267927	0.338837	-0.39477	-0.128679	-0.388847	-0.518917	-0.381244	-0.465106	-0.33884	-0.1269	-0.479674	-0.476054	0.0797036	0.0773955	-0.284905	-0.492113	0.180685	-0.408645	-0.532046	-0.361434	-0.218808	-0.234502	-0.360051	-0.412466	-0.428873	-0.308304	-0.490129	-0.48555	-0.0877975	0.166465	-0.454919
REACTOME_SYNTHESIS_OF_BILE_ACIDS_AND_BILE_SALTS	-0.241256	-0.244016	-0.30619	0.0664937	-0.238574	-0.365128	-0.259903	-0.39299	-0.215911	-0.45373	-0.334888	-0.24985	-0.237086	-0.469586	-0.237693	-0.198413	-0.33057	-0.200433	-0.388795	0.0274771	-0.315385	-0.222566	-0.264994	-0.120482	-0.436327	-0.221999	-0.176798	-0.251135	-0.166912	-0.412164	-0.366887	-0.362215	-0.352832	-0.225699	-0.224669	-0.273691	-0.0350235	-0.0299023	-0.0389368	-0.145962	-0.0145832	-0.326546	-0.232511	0.0208855	-0.0298525	0.00131628	-0.278039	-0.316332	-0.30098
REACTOME_ASPARTATE_AND_ASPARAGINE_METABOLISM	-0.607813	-0.655342	-0.492491	0.540124	-0.599019	-0.442994	-0.465292	-0.598473	-0.445128	-0.641791	-0.406579	-0.590215	-0.425308	-0.457645	-0.366236	-0.0898664	-0.566197	-0.188646	-0.4484	0.0843724	-0.476372	-0.31536	-0.384837	-0.268631	-0.418108	-0.520351	-0.261635	-0.626175	-0.306018	-0.394691	-0.603582	-0.619479	-0.461606	-0.445847	-0.46946	-0.446753	-0.0629446	-0.544693	0.235365	-0.473602	-0.286236	-0.401331	-0.279597	-0.123883	0.0306273	-0.47498	-0.685062	-0.552443	-0.583126
KEGG_NITROGEN_METABOLISM	-0.240408	-0.476522	-0.505103	0.352416	-0.47516	-0.520335	-0.455303	-0.384926	-0.584866	-0.368723	-0.380339	-0.25948	-0.222169	-0.451687	-0.439016	-0.393274	0.0484203	-0.461243	-0.0559673	-0.503904	-0.277891	-0.342821	-0.286251	-0.284134	-0.306006	-0.221058	-0.491409	-0.335717	-0.370373	-0.570213	-0.112423	-0.328539	-0.471432	-0.407148	-0.325881	-0.245665	-0.124603	-0.562434	-0.113982	-0.515926	-0.216785	-0.0812739	-0.50925	-0.111896	-0.165749	-0.077383	-0.192223	-0.159823	-0.58806
REACTOME_PHENYLALANINE_AND_TYROSINE_METABOLISM	-0.518765	-0.554542	-0.555349	0.653677	-0.596644	-0.510416	-0.333406	-0.59498	-0.358622	-0.556458	-0.720411	-0.694447	-0.318261	-0.610468	-0.506223	-0.171855	-0.36058	-0.535989	-0.602518	-0.275299	-0.56175	-0.672033	-0.478713	-0.35028	-0.750085	-0.555344	-0.693625	-0.546539	-0.558262	-0.67582	-0.426707	-0.42363	-0.362274	-0.325846	-0.472738	-0.604014	-0.508115	-0.36522	-0.404777	-0.552766	-0.393945	-0.62826	-0.604424	-0.119662	-0.569907	-0.41219	-0.676718	-0.359658	-0.739063
KEGG_METABOLISM_OF_XENOBIOTICS_BY_CYTOCHROME_P450	-0.342872	-0.434252	-0.36512	0.261204	-0.386956	-0.360477	-0.544138	-0.320433	-0.374041	-0.341782	-0.465943	-0.240182	-0.394562	-0.392122	-0.449595	-0.350973	-0.285582	-0.329628	-0.442137	0.0635809	-0.284584	-0.307459	-0.186317	-0.261404	-0.424433	-0.468962	-0.317589	-0.283752	-0.139399	-0.43696	-0.298657	-0.204757	-0.355865	-0.273054	-0.266946	-0.401429	-0.249428	-0.370124	0.05356	-0.34687	-0.171344	-0.320797	-0.127476	-0.40725	-0.322958	-0.19402	-0.359896	-0.272278	-0.505734
REACTOME_PEROXISOMAL_LIPID_METABOLISM	-0.498762	-0.633589	-0.668373	0.611087	-0.586939	-0.668238	-0.583509	-0.451102	-0.648043	-0.614989	-0.459099	-0.600288	-0.649351	-0.516179	-0.388275	-0.41939	-0.531542	-0.517352	-0.503119	-0.0810389	-0.567953	-0.54221	-0.533076	-0.462956	-0.669359	-0.457676	-0.590776	-0.551279	-0.552404	-0.611483	-0.567231	-0.491999	-0.418108	-0.696317	-0.564305	-0.605468	-0.501917	-0.418472	-0.162014	-0.524594	-0.57763	-0.595879	-0.741479	-0.236232	-0.569066	-0.224467	-0.591519	-0.499307	-0.552547
REACTOME_TYROSINE_CATABOLISM	-0.739996	-0.730428	-0.703172	0.699613	-0.783091	-0.748298	-0.271227	-0.66958	-0.510375	-0.630933	-0.810191	-0.67506	-0.581101	-0.640164	-0.669306	-0.245003	-0.40336	-0.539975	-0.715493	-0.622137	-0.458511	-0.656331	-0.539732	-0.593323	-0.764648	-0.632143	-0.796238	-0.593864	-0.782268	-0.775605	-0.476535	-0.470924	-0.629458	-0.315906	-0.52368	-0.748226	-0.619861	-0.524007	-0.5744	-0.636286	0.0669561	-0.743859	-0.650102	-0.329452	-0.691913	-0.659748	-0.605946	-0.401188	-0.780466
KEGG_BIOSYNTHESIS_OF_UNSATURATED_FATTY_ACIDS	-0.468755	-0.578009	-0.540293	0.495895	-0.656206	-0.540084	-0.397679	-0.33069	-0.468188	-0.435888	-0.518227	-0.466607	-0.407832	-0.508299	-0.408533	-0.525087	-0.253993	-0.298113	-0.543834	-0.341075	-0.340803	-0.428887	-0.463116	-0.468567	-0.31936	-0.483945	-0.344406	-0.0523543	-0.346315	-0.552415	-0.458276	-0.430637	-0.517258	-0.258237	-0.0946557	-0.368919	-0.222735	-0.423698	-0.0656867	-0.241842	-0.308496	-0.54361	-0.616417	-0.272991	-0.420031	-0.138125	-0.418036	-0.236033	-0.442052
REACTOME_DEFECTS_IN_VITAMIN_AND_COFACTOR_METABOLISM	-0.68018	-0.52946	-0.682537	0.309023	-0.503168	-0.234468	-0.497408	-0.447894	-0.470671	-0.551356	-0.607172	-0.620449	-0.635802	-0.623821	-0.741004	-0.26491	-0.477555	-0.713201	-0.602964	-0.435983	-0.606859	-0.540557	-0.463382	-0.293091	-0.681084	-0.458846	-0.511647	-0.478581	-0.693458	-0.733259	-0.50156	-0.433263	-0.465488	-0.240276	-0.395339	-0.51963	-0.349717	-0.30811	-0.394735	-0.489892	-0.475459	-0.579976	-0.48873	-0.679836	-0.417278	-0.340306	-0.462387	-0.460037	-0.663321
KEGG_PEROXISOME	-0.425689	-0.461848	-0.521935	0.554105	-0.531504	-0.551207	-0.490791	-0.411593	-0.571988	-0.451955	-0.503019	-0.560937	-0.521341	-0.489377	-0.330329	-0.308603	-0.535244	-0.332473	-0.415773	-0.309075	-0.49544	-0.515285	-0.451655	-0.36777	-0.509626	-0.379996	-0.489351	-0.412806	-0.53043	-0.473697	-0.573322	-0.501935	-0.274865	-0.442338	-0.513336	-0.486742	-0.284866	-0.39815	0.0159091	-0.442193	-0.435399	-0.494929	-0.541279	-0.205416	-0.422627	-0.173037	-0.557258	-0.525537	-0.584323
REACTOME_METABOLISM_OF_COFACTORS	-0.146291	-0.231361	-0.189839	0.625134	-0.51422	-0.613173	-0.318712	-0.519856	-0.570271	-0.449681	-0.583896	-0.569362	-0.424776	-0.525299	-0.57684	-0.312126	-0.54989	-0.512892	-0.541155	-0.545204	-0.645268	-0.535611	-0.411958	-0.402928	-0.293164	-0.3708	-0.589169	-0.569322	-0.482019	-0.556285	-0.550559	-0.530612	-0.305977	-0.193112	-0.558723	-0.537646	-0.016816	-0.318516	-0.539037	-0.548278	-0.0631544	-0.536523	-0.49134	-0.52138	-0.251002	-0.232909	-0.489535	-0.543181	-0.571965
REACTOME_UBIQUINOL_BIOSYNTHESIS	-0.731232	-0.717164	-0.515551	0.664541	-0.318996	-0.738698	-0.50823	-0.296656	-0.661735	-0.687208	-0.766269	-0.691326	-0.389702	-0.656496	-0.698006	-0.299594	-0.465006	-0.628413	-0.626995	-0.729513	-0.679041	-0.603987	-0.430824	-0.695716	0.281726	-0.517374	-0.738299	-0.462766	-0.774369	-0.676525	-0.511909	-0.52159	-0.408845	-0.53636	-0.5535	-0.475592	-0.411827	-0.40721	-0.607912	-0.644565	-0.125019	-0.730399	-0.648812	-0.669847	-0.531593	-0.228955	-0.652712	-0.451952	-0.566773
REACTOME_LYSINE_CATABOLISM	-0.761843	-0.651033	-0.728615	0.706966	-0.769004	-0.677913	-0.712651	-0.621444	-0.717583	-0.480563	-0.776756	-0.631903	-0.68446	-0.691534	-0.6864	-0.591801	-0.597219	-0.663159	-0.660777	-0.57538	-0.627216	-0.663821	-0.705597	-0.57381	-0.608758	-0.804365	-0.623338	-0.726889	-0.588877	-0.700303	-0.630791	-0.611657	-0.742701	-0.660053	-0.656919	-0.741446	-0.472695	-0.65993	-0.377609	-0.686836	-0.608643	-0.61674	-0.507569	-0.716874	-0.406795	-0.740153	-0.67002	-0.589114	-0.676088
REACTOME_CREATINE_METABOLISM	-0.535892	-0.678209	-0.694762	0.374534	-0.679453	-0.548795	-0.73917	-0.634103	-0.715085	-0.660119	-0.711689	-0.599179	-0.32337	-0.569951	-0.678062	-0.275955	-0.545443	-0.691343	-0.0870601	-0.214446	-0.567326	-0.626192	-0.320689	-0.636461	-0.698542	-0.728435	-0.441651	-0.621154	-0.645644	-0.648123	-0.573026	-0.534376	-0.653639	-0.627612	-0.324973	-0.576913	-0.0874882	-0.32636	-0.601929	-0.616438	-0.52039	-0.604739	-0.365286	-0.487097	-0.608034	-0.219693	-0.292149	-0.53193	-0.49378
REACTOME_PYRUVATE_METABOLISM_AND_CITRIC_ACID_TCA_CYCLE	-0.531182	-0.650936	-0.505199	0.591545	-0.600486	-0.592161	-0.565989	-0.396071	-0.593311	-0.423684	-0.57102	-0.626562	-0.422348	-0.512525	-0.421655	-0.149573	-0.587978	-0.527387	-0.359315	-0.587964	-0.120083	-0.551687	-0.614874	-0.275902	-0.540427	-0.533957	-0.534189	-0.590559	-0.591274	-0.650287	-0.634153	-0.586671	-0.398827	-0.379192	-0.570741	-0.530494	0.204131	-0.421255	-0.266872	-0.636419	0.073618	-0.44979	-0.405993	-0.424784	-0.179371	-0.448061	-0.531959	-0.632079	-0.612864
REACTOME_FATTY_ACID_METABOLISM	-0.370203	-0.424608	-0.426784	0.400433	-0.411443	-0.424359	-0.448299	-0.270259	-0.449913	-0.403116	-0.399885	-0.418647	-0.407158	-0.411611	-0.373497	-0.289769	-0.401744	-0.368166	-0.422553	-0.233685	-0.339817	-0.369897	-0.41763	-0.196792	-0.463958	-0.429737	-0.400586	-0.307212	-0.405061	-0.478116	-0.46511	-0.461667	-0.141419	-0.344855	-0.313137	-0.383096	-0.234263	-0.336298	-0.146793	-0.391205	-0.280236	-0.447817	-0.372247	-0.175628	-0.247552	-0.285618	-0.421148	-0.417004	-0.424785
KEGG_PYRUVATE_METABOLISM	-0.487907	-0.602422	-0.497458	0.387883	-0.407395	-0.495076	-0.40944	-0.427	-0.532217	-0.507245	-0.52341	-0.280117	-0.437977	-0.399868	-0.415107	-0.0729437	-0.605377	-0.39352	-0.514494	-0.233603	-0.354876	-0.636437	-0.491497	-0.312999	-0.441116	-0.506879	-0.34182	-0.612636	-0.447985	-0.433815	-0.590721	-0.415222	-0.174512	-0.290929	-0.564408	-0.561905	-0.0857467	-0.286987	-0.420559	-0.631701	-0.245747	-0.483475	-0.343247	-0.584652	-0.185182	-0.517215	-0.570216	-0.595567	-0.612459
REACTOME_BIOTIN_TRANSPORT_AND_METABOLISM	-0.663768	-0.655685	-0.664336	0.539041	-0.587653	-0.676419	-0.488196	-0.51334	-0.708081	-0.649315	-0.702231	-0.686385	-0.567041	-0.738844	-0.698654	-0.150682	-0.606802	-0.689505	-0.684938	-0.518299	-0.687104	-0.662756	-0.41419	-0.518534	-0.574291	-0.556841	-0.555261	-0.661397	-0.74644	-0.765653	-0.606632	-0.482647	-0.592543	-0.487158	-0.655847	-0.576907	-0.349189	-0.502767	-0.364581	-0.450802	-0.431171	-0.751375	-0.712437	-0.722412	-0.365365	-0.557751	-0.710574	-0.589772	-0.753403
REACTOME_THE_CITRIC_ACID_TCA_CYCLE_AND_RESPIRATORY_ELECTRON_TRANSPORT	-0.614963	-0.627921	-0.637792	0.622576	-0.638539	-0.614594	-0.5954	-0.560398	-0.649108	-0.551572	-0.603182	-0.655424	-0.505815	-0.56462	-0.497564	-0.458653	-0.588448	-0.636137	-0.534796	-0.61425	-0.420288	-0.573861	-0.679173	-0.519735	-0.660685	-0.597979	-0.641618	-0.641114	-0.693224	-0.66698	-0.60588	-0.590886	-0.52336	-0.560515	-0.605333	-0.624257	-0.461345	-0.613753	-0.489623	-0.51849	-0.441834	-0.586804	-0.625547	-0.546215	-0.529937	-0.558943	-0.58241	-0.592209	-0.668947
REACTOME_BRANCHED_CHAIN_AMINO_ACID_CATABOLISM	-0.709183	-0.791148	-0.736933	0.74411	-0.648417	-0.723816	-0.712047	-0.572532	-0.780063	-0.505336	-0.659985	-0.701621	-0.756471	-0.482086	-0.571352	-0.44222	-0.673747	-0.686342	-0.642441	-0.534469	-0.614203	-0.739556	-0.759213	-0.532155	-0.629518	-0.610663	-0.70663	-0.699163	-0.766214	-0.733145	-0.632592	-0.651381	-0.491979	-0.730812	-0.675438	-0.711137	-0.448978	-0.672048	-0.596354	-0.665564	-0.440107	-0.634735	-0.73995	-0.726924	-0.485325	-0.608477	-0.750061	-0.600749	-0.82021
REACTOME_CITRIC_ACID_CYCLE_TCA_CYCLE	-0.655637	-0.803577	-0.711369	0.7133	-0.663558	-0.753642	-0.691887	-0.568379	-0.716575	-0.704435	-0.653883	-0.766113	-0.549677	-0.617356	-0.49874	-0.396093	-0.7081	-0.743128	-0.505327	-0.759698	-0.345228	-0.749349	-0.849627	-0.52392	-0.662643	-0.627871	-0.731852	-0.65273	-0.808916	-0.859434	-0.771554	-0.756761	-0.622043	-0.5823	-0.695647	-0.728392	0.0837426	-0.547983	-0.552448	-0.729485	-0.397999	-0.55352	-0.729401	-0.569953	-0.092558	-0.528617	-0.72516	-0.699795	-0.762885
REACTOME_SYNTHESIS_OF_KETONE_BODIES	-0.714319	-0.672805	-0.741973	0.592649	-0.782992	-0.729338	-0.752431	-0.640073	-0.791964	-0.771951	-0.801681	-0.725033	-0.599686	-0.714266	-0.807481	-0.544464	-0.474595	-0.804341	-0.681798	-0.77883	-0.670512	-0.711575	-0.720301	-0.754953	-0.711075	-0.592587	-0.707988	-0.586057	-0.664105	-0.798631	-0.526686	-0.44125	-0.550601	-0.684328	-0.510545	-0.559608	-0.362779	-0.484058	-0.531094	-0.657329	-0.721815	-0.693046	-0.704457	-0.664001	-0.538899	-0.593253	-0.630271	-0.460744	-0.757644
[truncated: 415 more columns]
