# Supplementary material for: A Proteogenomic Atlas of Clear Cell Renal Cell Carcinoma in a Chinese Population
Source: Research Square preprint supplement (doi:10.21203/rs.3.rs-221123/v1), 2021-02-26
Supplement: Supplementary file 11 [file ae4098117de52c36eaeb274f.xlsx]

## Sheet: Descrption
Table S6: Proteomic differences based on ISUP grade and TNM stage; Related to Figures S7C-D.
grade	overrepresented pathways of different ISUP grades
stage	overrepresented pathways of different TNM stages

## Sheet: grade
Grade 1&2 overrepresented pathways	p-value	q-value	pathway	source	external_id	members_input_overlap	members_input_overlap_geneids	size	effective_size
	0.000347213	0.0447861	Molecules associated with elastic fibres	Reactome	R-HSA-2129379	MFAP4; LTBP2; FBLN5	4239; 10516; 4053	31	31
	0.000542862	0.0447861	Elastic fibre formation	Reactome	R-HSA-1566948	MFAP4; LTBP2; FBLN5	4239; 10516; 4053	36	36
	0.000946156	0.0520386	Tight junction - Homo sapiens (human)	KEGG	path:hsa04530	MYH11; MYL9; LLGL2; CLDN5; MAP3K5	4629; 4217; 10398; 3993; 7122	170	170
	0.0019226	0.0584179	Extracellular matrix organization	Reactome	R-HSA-1474244	LTBP2; TNXB; COL14A1; ITGA7; MFAP4; FBLN5	7148; 10516; 3679; 7373; 4053; 4239	294	294
	0.00198102	0.0584179	EPHA-mediated growth cone collapse	Reactome	R-HSA-3928663	MYH11; MYL9	4629; 10398	15	15
	0.00225754	0.0584179	PI3K events in ERBB2 signaling	Reactome	R-HSA-1963642	ERBB3; GAB1	2549; 2065	16	16
	0.00318946	0.0584179	RHO GTPases activate CIT	Reactome	R-HSA-5625900	MYH11; MYL9	4629; 10398	19	19
	0.00318946	0.0584179	RHO GTPases Activate ROCKs	Reactome	R-HSA-5627117	MYH11; MYL9	4629; 10398	19	19
	0.00353372	0.0584179	Sema4D induced cell migration and growth-cone collapse	Reactome	R-HSA-416572	MYH11; MYL9	4629; 10398	20	20
	0.00358954	0.0584179	Constitutive Signaling by Aberrant PI3K in Cancer	Reactome	R-HSA-2219530	ERBB3; PDGFRB; GAB1	2549; 2065; 5159	69	69
	0.00389452	0.0584179	RHO GTPases activate PAKs	Reactome	R-HSA-5627123	MYH11; MYL9	4629; 10398	21	21
	0.00466521	0.0641466	Histidine degradation	INOH	None	AOC3; HNMT	8639; 3176	23	23
	0.00507478	0.0644107	Sema4D in semaphorin signaling	Reactome	R-HSA-400685	MYH11; MYL9	10398; 4629	24	24
	0.00582429	0.0662613	ECM-receptor interaction - Homo sapiens (human)	KEGG	path:hsa04512	TNXB; CD36; ITGA7	948; 3679; 7148	82	82
	0.00602376	0.0662613	Signaling Pathways in Glioblastoma	Wikipathways	WP2261	PDGFRB; ERBB3; GAB1	5159; 2549; 2065	83	83
	0.00786239	0.0763115	Amine compound SLC transporters	Reactome	R-HSA-425428	SLC6A13; SLC44A2	57153; 6540	30	30
	0.00786239	0.0763115	Pre-NOTCH Transcription and Translation	Reactome	R-HSA-1912408	AGO3; NOTCH3	192669; 4854	30	30
	0.00848988	0.0778239	PI3K/AKT Signaling in Cancer	Reactome	R-HSA-2219528	ERBB3; GAB1; PDGFRB	2065; 5159; 2549	94	94
	0.00925096	0.0803373	PI5P, PP2A and IER3 Regulate PI3K/AKT Signaling	Reactome	R-HSA-6811558	ERBB3; GAB1; PDGFRB	2065; 5159; 2549	97	97
Grade 3 overrepresented pathways	p-value	q-value	pathway	source	external_id	members_input_overlap	members_input_overlap_geneids	size	effective_size
	3.01886e-05	0.00507169	Regulation of Insulin-like Growth Factor (IGF) transport and uptake by Insulin-like Growth Factor Binding Proteins (IGFBPs)	Reactome	R-HSA-381426	SERPINA10; PLG; IGFBP3; IGFBP4; IGFBP5; AFP; FGA	3488; 51156; 3486; 2243; 3487; 174; 5340	127	126
	0.000118187	0.00675222	fibrinolysis pathway	BioCarta	fibrinolysispathway	PLG; FGA; CPB2	2243; 1361; 5340	14	14
	0.000120575	0.00675222	Post-translational protein phosphorylation	Reactome	R-HSA-8957275	SERPINA10; IGFBP3; IGFBP4; IGFBP5; AFP; FGA	3488; 51156; 3486; 2243; 3487; 174	110	109
	0.000278018	0.0116767	Metabolism of steroids	Reactome	R-HSA-8957322	HSD17B14; SCD; OSBPL1A; FDXR; MVK; TSPO	51171; 4598; 114876; 6319; 2232; 706	127	127
	0.00160722	0.0478242	Metabolism of steroid hormones	Reactome	R-HSA-196071	FDXR; TSPO; HSD17B14	51171; 2232; 706	33	33
	0.00207133	0.0478242	IGF signaling	INOH	None	IGFBP3; IGFBP4; IGFBP5	3486; 3488; 3487	36	36
	0.00235909	0.0478242	Complement and coagulation cascades - Homo sapiens (human)	KEGG	path:hsa04610	PLG; CPB2; ITGAM; FGA	3684; 2243; 1361; 5340	79	79
	0.00271841	0.0478242	Metabolism of RNA	Reactome	R-HSA-8953854	TRMT112; DDX20; SNRPB2; LSM6; RPP40; EXOSC9; SARNP; COL23A1; TRMT1; CPSF3; PNO1	11157; 11218; 5393; 10799; 51692; 91522; 6629; 56902; 55621; 51504; 84324	586	584
	0.00312558	0.0478242	Pregnenolone biosynthesis	Reactome	R-HSA-196108	FDXR; TSPO	2232; 706	12	12
	0.00333743	0.0478242	Direct p53 effectors	PID	p53downstreampathway	DDB2; FDXR; CTSD; AFP; IGFBP3	1509; 1643; 2232; 3486; 174	143	142
	0.00345465	0.0478242	Steroid hormones	Reactome	R-HSA-209943	FDXR; TSPO; HSD17B14	51171; 2232; 706	43	43
	0.0036886	0.0478242	Urokinase-type plasminogen activator (uPA) and uPAR-mediated signaling	PID	upa_upar_pathway	PLG; FGA; ITGAM	5340; 2243; 3684	44	44
	0.00409201	0.0478242	Human Complement System	Wikipathways	WP2806	PLG; CRP; WAS; FGA	7454; 2243; 1401; 5340	92	92
	0.00418498	0.0478242	Glycosphingolipid metabolism	Reactome	R-HSA-1660662	GBA3; PSAP; NEU1	5660; 57733; 4758	47	46
	0.00427001	0.0478242	Irinotecan Pathway, Pharmacodynamics	PharmGKB	PA2029	UGT1A6; CES2	54578; 8824	14	14
	0.00472009	0.0495609	Amino sugar and nucleotide sugar metabolism - Homo sapiens (human)	KEGG	path:hsa00520	HKDC1; TSTA3; UAP1L1	80201; 7264; 91373	48	48
	0.005381	0.0531769	Metabolism of proteins	Reactome	R-HSA-392499	TRMT112; SERPINA10; USP4; UBE2L6; POFUT2; PEX14; BCS1L; RAB38; FBXW8; DDB2; FGA; TARS2; CTSD; IGFBP3; TNIP1; IGFBP4; IGFBP5; AFP; GARS; DOLPP1; TSTA3; CPB2; PLG; NEU1	1509; 7264; 1643; 26259; 1361; 9246; 5195; 617; 3488; 2617; 7375; 51156; 23682; 4758; 5340; 3487; 51504; 23275; 3486; 10318; 174; 80222; 57171; 2243	2008	1999
	0.00629415	0.0552759	Metabolism of Angiotensinogen to Angiotensins	Reactome	R-HSA-2022377	CTSD; CPB2	1509; 1361	17	17
	0.00653083	0.0552759	Metabolism of nucleotides	Reactome	R-HSA-15869	UPB1; NUDT1; ADAL; PFAS	4521; 5198; 51733; 161823	105	105
	0.0067234	0.0552759	Metabolism of lipids	Reactome	R-HSA-556833	FAM213B; TNFAIP8L2; HSD17B14; SCD; PSAP; OSBPL1A; FDXR; MVK; TSPO; NEU1; GBA3	4598; 127281; 6319; 114876; 5660; 4758; 706; 51171; 2232; 79626; 57733	664	659
	0.00690948	0.0552759	Validated transcriptional targets of TAp63 isoforms	PID	tap63pathway	FDXR; IGFBP3; SPATA18	3486; 132671; 2232	55	55
	0.00861194	0.0633509	Metabolism	Reactome	R-HSA-1430728	TRMT112; FAM213B; TNFAIP8L2; HSD17B14; OSBPL1A; UPB1; UGT1A6; SCD; ADAL; GBA3; ABCD4; PFAS; NUDT1; CES2; FDXR; MVK; TSPO; SDSL; PSPH; MTHFD1L; PSAP; SDHC; NEU1	8824; 4598; 161823; 113675; 5660; 6391; 2232; 79626; 706; 51733; 114876; 4758; 4521; 6319; 5723; 51171; 5198; 51504; 5826; 127281; 54578; 25902; 57733	1972	1960
	0.00867303	0.0633509	Activation of gene expression by SREBF (SREBP)	Wikipathways	WP2706	SCD; MVK	4598; 6319	20	20
	0.00954213	0.0667949	Mitochondrial tRNA aminoacylation	Reactome	R-HSA-379726	TARS2; GARS	2617; 80222	21	21
Grade 4 overrepresented pathways	p-value	q-value	pathway	source	external_id	members_input_overlap	members_input_overlap_geneids	size	effective_size
	6.82449e-21	1.00661e-17	SRP-dependent cotranslational protein targeting to membrane	Reactome	R-HSA-1799339	RPS12; RPS11; RPS10; SPCS1; SPCS2; RPN1; RPLP2; RPL4; RPS27A; RPS18; RPN2; DDOST; RPS2; SRP54; SRPRB; RPL27; RPS14; RPL23; FAU; RPL7; RPS19; RPS27; RPS24; RPS25; RPL18A; RPLP1; RPS28; RPL10; RPL11; RPL12; SEC61B; SEC11A; SEC11C; RPL38; SRP68; SSR3; SSR4	6124; 6748; 9789; 6176; 6206; 6233; 6155; 6230; 1650; 6134; 6205; 6229; 6729; 6223; 6232; 6185; 6136; 58477; 9349; 6129; 6204; 6181; 6747; 6222; 2197; 6169; 6184; 6208; 90701; 6142; 6730; 23478; 6135; 6234; 28972; 6187; 10952	124	123
	3.60503e-20	2.65871e-17	Translation	Reactome	R-HSA-72766	RPS12; RPS11; RPS10; IARS; SPCS2; RPN1; RPLP2; RPL4; RPS27A; RPS18; RPN2; AIMP1; DDOST; RPS2; MRPL13; FAU; EIF5B; EIF2S3; EIF2S2; EIF3H; EIF3K; SRPRB; VARS; SPCS1; EIF2S1; RPL27; RPS14; RPL23; EIF3G; RPL7; RPLP1; RPS27; RPS24; RPS25; RPL18A; RPS28; EEF1B2; SRP54; RPL10; RPL11; RPL12; SEC61B; SEC11A; SEC11C; MRPL48; RPL38; EEF1D; RPS19; SRP68; SSR3; SSR4; MRPL46; EIF4A2; EIF4A1; EIF3B; EEF2; EIF4H	1965; 6124; 6748; 6205; 6176; 8667; 6206; 6233; 6155; 6230; 1974; 9255; 1650; 6229; 6134; 9789; 7458; 9669; 1968; 1938; 6135; 6232; 1973; 8666; 6185; 6234; 6136; 6222; 58477; 27335; 9349; 6204; 28998; 1933; 8662; 6181; 6187; 6223; 2197; 6747; 6169; 1936; 6184; 6208; 90701; 3376; 6142; 6730; 23478; 8894; 6729; 28972; 6129; 10952; 7407; 51642; 26589	310	307
	7.86477e-19	3.86685e-16	GTP hydrolysis and joining of the 60S ribosomal subunit	Reactome	R-HSA-72706	RPS12; RPS11; RPS10; RPS14; RPL7; RPL4; RPS27A; RPS18; RPS2; FAU; EIF5B; EIF2S3; EIF2S2; EIF3H; EIF3K; EIF2S1; EIF3B; RPL23; EIF3G; RPLP2; RPS19; RPS27; RPS24; RPS25; RPL18A; RPLP1; RPS28; RPL10; EIF4H; RPL12; RPL11; RPL38; EIF4A1; RPL27; EIF4A2	6124; 6176; 6206; 6233; 6155; 6230; 8666; 6134; 6205; 7458; 6229; 6223; 6232; 1965; 6136; 9669; 8662; 1968; 27335; 9349; 6129; 6204; 6181; 6222; 2197; 6169; 6208; 6142; 1974; 8667; 8894; 6135; 1973; 6234; 6187	126	124
	5.45899e-18	1.342e-15	Cap-dependent Translation Initiation	Reactome	R-HSA-72737	RPS12; RPS11; RPS10; RPS14; RPL7; RPL4; RPS27A; RPS18; RPS2; FAU; EIF5B; EIF2S3; EIF2S2; EIF3H; EIF3K; EIF2S1; EIF3B; RPL23; EIF3G; RPLP2; RPS19; RPS27; RPS24; RPS25; RPL18A; RPLP1; RPS28; RPL10; EIF4H; RPL12; RPL11; RPL38; EIF4A1; RPL27; EIF4A2	6124; 6176; 6206; 6233; 6155; 6230; 8666; 6134; 6205; 7458; 6229; 6223; 6232; 1965; 6136; 9669; 8662; 1968; 27335; 9349; 6129; 6204; 6181; 6222; 2197; 6169; 6208; 6142; 1974; 8667; 8894; 6135; 1973; 6234; 6187	133	131
	5.45899e-18	1.342e-15	Eukaryotic Translation Initiation	Reactome	R-HSA-72613	RPS12; RPS11; RPS10; RPS14; RPL7; RPL4; RPS27A; RPS18; RPS2; FAU; EIF5B; EIF2S3; EIF2S2; EIF3H; EIF3K; EIF2S1; EIF3B; RPL23; EIF3G; RPLP2; RPS19; RPS27; RPS24; RPS25; RPL18A; RPLP1; RPS28; RPL10; EIF4H; RPL12; RPL11; RPL38; EIF4A1; RPL27; EIF4A2	6124; 6176; 6206; 6233; 6155; 6230; 8666; 6134; 6205; 7458; 6229; 6223; 6232; 1965; 6136; 9669; 8662; 1968; 27335; 9349; 6129; 6204; 6181; 6222; 2197; 6169; 6208; 6142; 1974; 8667; 8894; 6135; 1973; 6234; 6187	133	131
	5.14867e-18	1.342e-15	L13a-mediated translational silencing of Ceruloplasmin expression	Reactome	R-HSA-156827	RPS12; RPS11; RPS10; RPS14; RPL7; RPL4; RPS27A; RPS18; RPS2; FAU; EIF2S1; EIF2S3; EIF2S2; EIF3H; EIF3K; EIF3B; RPL23; EIF3G; RPLP2; RPS19; RPS27; RPS24; RPS25; RPL18A; RPLP1; RPS28; RPL10; EIF4H; RPL12; RPL11; RPL38; EIF4A1; RPL27; EIF4A2	6124; 6176; 6206; 6233; 6155; 6230; 8666; 6134; 6205; 7458; 6229; 6223; 6232; 1965; 6136; 8662; 1968; 27335; 9349; 6129; 6204; 6181; 6222; 2197; 6169; 6208; 6142; 1974; 8667; 8894; 6135; 1973; 6234; 6187	125	123
	4.81019e-17	1.01358e-14	Protein processing in endoplasmic reticulum - Homo sapiens (human)	KEGG	path:hsa04141	BAG2; RPN1; RPN2; HSPA5; HSP90B1; SEC63; DDOST; EIF2S1; DNAJC3; TXNDC5; CANX; HSPH1; DAD1; DNAJB1; DERL2; HSP90AB1; DNAJB11; P4HB; SEL1L; PDIA6; ERLEC1; PDIA4; PDIA3; LMAN1; LMAN2; STT3B; STT3A; SEC61B; SEC23A; DNAJC5; CALR; EIF2AK2; DNAJC1; BAK1; SSR3; SSR4; RBX1; CKAP4	51726; 7184; 6184; 6185; 9532; 10808; 578; 1603; 6747; 6748; 27248; 1650; 3703; 81567; 10952; 10960; 64215; 10970; 3309; 10484; 9978; 3326; 6400; 9601; 3337; 811; 821; 11231; 51009; 2923; 201595; 10130; 3998; 5034; 1965; 80331; 5610; 5611	165	165
	4.93176e-15	8.0826e-13	Translation initiation complex formation	Reactome	R-HSA-72649	RPS12; RPS11; RPS10; RPS14; RPS19; RPS18; RPS27A; RPS2; FAU; EIF2S1; EIF2S3; EIF2S2; EIF3H; EIF3K; EIF3B; EIF3G; RPS27; RPS24; RPS25; RPS28; EIF4H; EIF4A1; EIF4A2	1965; 6223; 6232; 1974; 6222; 6205; 8666; 8894; 6206; 6230; 1973; 6208; 6234; 2197; 6187; 8662; 7458; 6229; 27335; 6233; 8667; 6204; 1968	68	66
	4.93176e-15	8.0826e-13	Ribosomal scanning and start codon recognition	Reactome	R-HSA-72702	RPS12; RPS11; RPS10; RPS14; RPS19; RPS18; RPS27A; RPS2; FAU; EIF2S1; EIF2S3; EIF2S2; EIF3H; EIF3K; EIF3B; EIF3G; RPS27; RPS24; RPS25; RPS28; EIF4H; EIF4A1; EIF4A2	1965; 6223; 6232; 1974; 8894; 6222; 6205; 8666; 6206; 6230; 1973; 6208; 6234; 2197; 6187; 8662; 7458; 6229; 27335; 6233; 8667; 6204; 1968	68	66
	5.7204e-15	8.4376e-13	Metabolism of RNA	Reactome	R-HSA-8953854	PABPN1; CSTF2T; RPL7; RPS10; SYF2; NCBP2; RPS12; SF3B5; RRP9; RPL4; RPS18; RPL18A; RRP7A; SF1; EIF4A1; PPIL1; RPS25; NHP2; RPS2; EDC4; POLR2L; NUP88; TP53RK; BCAS2; PRPF4; RNPS1; SRSF5; SET; GPKOW; RPL27; NOP56; SMG8; PRPF40A; FAU; LSM4; YBX1; UTP15; RPLP2; WDR61; NUP210; RPLP1; GAR1; RPS27; RPS24; RPS27A; WDR3; XPOT; NUP107; SMNDC1; SNRNP70; RPS14; ALYREF; RPS28; USP39; RPL10; RPL11; RPL12; THOC…	10285; 6155; 57122; 6229; 27341; 55181; 23165; 10528; 6142; 6135; 10189; 9416; 80349; 6124; 6187; 83443; 246175; 55660; 6232; 10713; 6136; 9136; 6204; 55110; 6222; 23283; 22894; 6234; 2091; 7536; 23644; 6176; 6206; 11260; 23225; 25949; 57187; 22916; 51645; 6418; 10885; 8106; 54433; 6181; 112858; 51095; 6430; 1974; 84128; 5441; 27238; 6129; 6233; 10286; 10921; 6230; 4904; 6134; 6205; 55651; 6223; …	586	584
	7.19466e-15	9.64739e-13	Activation of the mRNA upon binding of the cap-binding complex and eIFs, and subsequent binding to 43S	Reactome	R-HSA-72662	RPS12; RPS11; RPS10; RPS14; RPS19; RPS18; RPS27A; RPS2; EIF3G; EIF2S1; EIF2S3; EIF2S2; EIF3H; EIF3K; EIF3B; FAU; RPS27; RPS24; RPS25; RPS28; EIF4H; EIF4A1; EIF4A2	27335; 1965; 6223; 6232; 1974; 6222; 2197; 8666; 8894; 6206; 6230; 1973; 6208; 6234; 6187; 6205; 8662; 7458; 6229; 6233; 8667; 6204; 1968	69	67
	1.00749e-13	1.14311e-11	Eukaryotic Translation Elongation	Reactome	R-HSA-156842	RPS12; RPS11; RPS10; RPS14; RPL7; RPL4; RPS27A; RPS18; RPS2; RPL27; RPL23; FAU; RPLP2; RPS19; RPS27; RPS24; RPS25; RPL18A; RPLP1; RPS28; EEF1B2; RPL10; RPL11; RPL12; RPL38; EEF1D; EEF2	6124; 6176; 6206; 6233; 6155; 6230; 6134; 6205; 6229; 1938; 6223; 6232; 6136; 9349; 6129; 6204; 1933; 6181; 6222; 2197; 6169; 1936; 6208; 6142; 6135; 6234; 6187	106	105
	9.62303e-14	1.14311e-11	Formation of a pool of free 40S subunits	Reactome	R-HSA-72689	RPS12; RPS11; RPS10; RPS14; RPL7; RPL4; RPS27A; RPS18; RPS2; FAU; EIF3H; EIF3K; EIF3B; RPL23; EIF3G; RPLP2; RPS19; RPS27; RPS24; RPS25; RPL18A; RPLP1; RPS28; RPL10; RPL11; RPL12; RPL38; RPL27	6124; 6176; 6206; 6233; 6155; 6230; 8666; 6134; 6205; 6229; 6223; 6232; 6136; 8662; 27335; 9349; 6129; 6204; 6181; 6222; 2197; 6169; 6208; 6142; 8667; 6135; 6234; 6187	115	113
	2.4613e-13	2.42028e-11	Nonsense Mediated Decay (NMD) enhanced by the Exon Junction Complex (EJC)	Reactome	R-HSA-975957	RPS12; RPS11; RPS10; NCBP2; RPS14; RPL7; RPL4; RPS27A; RPS18; RPS2; RPL27; SMG8; RPL23; FAU; RPLP2; RPS19; RPS27; RPS24; RPS25; RNPS1; RPL18A; RPLP1; RPS28; RPL10; RPL11; RPL12; RPL38; MAGOHB	6124; 10921; 6176; 6206; 6233; 6155; 6230; 6134; 6205; 6229; 6223; 6232; 22916; 6136; 9349; 6129; 6204; 55110; 55181; 6181; 6222; 2197; 6169; 6208; 6142; 6135; 6234; 6187	118	117
	2.4613e-13	2.42028e-11	Nonsense-Mediated Decay (NMD)	Reactome	R-HSA-927802	RPS12; RPS11; RPS10; NCBP2; RPS14; RPL7; RPL4; RPS27A; RPS18; RPS2; RPL27; SMG8; RPL23; FAU; RPLP2; RPS19; RPS27; RPS24; RPS25; RNPS1; RPL18A; RPLP1; RPS28; RPL10; RPL11; RPL12; RPL38; MAGOHB	6124; 10921; 6176; 6206; 6233; 6155; 6230; 6134; 6205; 6229; 6223; 6232; 22916; 6136; 9349; 6129; 6204; 55110; 55181; 6181; 6222; 2197; 6169; 6208; 6142; 6135; 6234; 6187	118	117
	3.38457e-13	3.12015e-11	Neutrophil degranulation	Reactome	R-HSA-6798695	NCKAP1L; RAB4B; MAN2B1; AMPD3; HLA-B; HP; PRDX4; KRT1; MGST1; HGSNAT; DYNLL1; DNAJC3; RNASET2; TMEM173; CPPED1; YPEL5; CTSZ; RAB31; TYROBP; TXNDC5; IMPDH1; IMPDH2; ATP6AP2; HSP90AB1; DOCK2; DNAJC13; PYCARD; SURF4; DPP7; CD59; CD63; FRK; CD44; ALOX5; CTSC; ANXA2; FCGR2A; ERP44; PLEKHO2; ALDOC; CTSS; RHOG; PA2G4; PDAP1; DBNL; ORM1; DNAJC5; HLA-C; HVCN1; ROCK1; HMOX2; TCIRG1; CD14; DDOST; PTPRC; CKA…	929; 5795; 10549; 84329; 8635; 966; 374395; 3071; 4257; 391; 3106; 138050; 29952; 5004; 960; 6093; 3615; 55313; 1650; 3326; 51646; 4125; 53916; 1075; 3163; 302; 2212; 10159; 6836; 81567; 340061; 272; 967; 10312; 1938; 7305; 240; 3240; 1794; 3107; 84061; 8655; 230; 1520; 23071; 11333; 29108; 2990; 3614; 3848; 23317; 80301; 1522; 5788; 5611; 10970; 80331; 2444; 5036; 28988; 11031	490	485
	5.54854e-13	4.81417e-11	Formation of the ternary complex, and subsequently, the 43S complex	Reactome	R-HSA-72695	EIF3H; RPS27; RPS11; RPS25; RPS12; RPS19; RPS18; RPS24; RPS28; EIF3G; RPS10; EIF3K; RPS14; RPS2; RPS27A; FAU; EIF2S1; EIF3B; EIF2S3; EIF2S2	1965; 6223; 6232; 6222; 2197; 8666; 8894; 6206; 6230; 6208; 6234; 6187; 6205; 8662; 6229; 27335; 6233; 8667; 6204; 1968	61	59
	5.93225e-13	4.86115e-11	Cytoplasmic Ribosomal Proteins	Wikipathways	WP477	RPS12; RPS11; RPS10; RPS14; RPL7; RPLP1; RPS18; RPL18A; RPS27A; RPS2; RPL4; RPL27; RPL23; FAU; RPLP2; RPS19; RPS27; RPS24; RPS25; RPS28; RPL10; RPL11; RPL12; RPL38	6124; 6129; 6222; 6155; 6142; 6176; 6169; 2197; 6204; 6205; 6206; 6208; 9349; 6187; 6223; 6181; 6229; 6136; 6134; 6135; 6234; 6230; 6233; 6232	88	88
	1.10656e-12	8.59042e-11	Vesicle-mediated transport	Reactome	R-HSA-5653656	OCRL; DYNLL1; SEC23IP; NECAP2; CTSZ; CHMP4B; CD59; HSP90B1; COPA; ARCN1; DNM3; SH3GL1; PLIN3; MSR1; RAB8B; EPS15; BET1; TMED3; SEC23A; YIPF6; TPD52; KIF2A; RAB3IP; TMED9; KIF5B; DNASE2; GCC2; GOSR1; TMED10; SURF4; COPZ1; HPR; RPS27A; GAPVD1; ARPC2; CTSC; MAN2A1; ARPC4; AAK1; GGA2; LMAN1; LMAN2; MVB12A; COPS7B; GALNT1; GALNT2; HSPH1; SEC22B; LRP1; SCOC; BET1L; VAMP7; M6PR; GBF1; CALR; TRAPPC4; TXN…	8675; 10282; 966; 10226; 64786; 6455; 128866; 2060; 26052; 51762; 93343; 4952; 9554; 6845; 10109; 22818; 4035; 4481; 2590; 7184; 811; 1075; 10960; 55014; 7163; 6836; 3267; 11196; 10972; 10342; 64708; 51272; 54732; 3831; 3796; 9332; 2589; 3240; 81567; 10484; 9648; 23062; 55707; 51399; 8655; 9527; 372; 4074; 26130; 6233; 1777; 10096; 22848; 3250; 1314; 3998; 27243; 3799; 64746; 1522; 143187; 8729; …	620	620
	1.66534e-12	1.22819e-10	Peptide chain elongation	Reactome	R-HSA-156902	RPS12; RPS11; RPS10; RPS14; RPL7; RPL4; RPS27A; RPS18; RPS2; RPL27; RPL23; FAU; RPLP2; RPS19; RPS27; RPS24; RPS25; RPL18A; RPLP1; RPS28; RPL10; RPL11; RPL12; RPL38; EEF2	6124; 6176; 6206; 6155; 6230; 6134; 6205; 6229; 1938; 6223; 6232; 6233; 6136; 9349; 6129; 6204; 6181; 6222; 2197; 6169; 6208; 6142; 6135; 6234; 6187	101	100
	3.22833e-12	2.26751e-10	Selenoamino acid metabolism	Reactome	R-HSA-2408522	RPS12; RPS11; RPS10; RPS14; RPL7; RPL4; RPS18; RPL18A; AIMP1; IARS; RPS27A; RPS2; RPL27; RPL23; FAU; RPLP2; RPS19; RPS27; RPS24; RPS25; RPLP1; RPS28; RPL10; RPL11; RPL12; RPL38; NNMT; AHCY	6124; 6176; 6206; 6155; 6230; 9255; 6229; 6134; 6205; 6223; 6232; 6136; 9349; 6129; 6204; 6181; 191; 6222; 2197; 6169; 6208; 4837; 3376; 6142; 6135; 6234; 6187; 6233	130	129
	5.39846e-12	3.61942e-10	Nonsense Mediated Decay (NMD) independent of the Exon Junction Complex (EJC)	Reactome	R-HSA-975956	RPS12; RPS11; RPS10; NCBP2; RPS14; RPL7; RPL4; RPS27A; RPS18; RPS2; RPL27; RPL23; FAU; RPLP2; RPS19; RPS27; RPS24; RPS25; RPL18A; RPLP1; RPS28; RPL10; RPL11; RPL12; RPL38	6124; 6176; 6206; 6233; 6155; 6230; 6134; 6205; 6229; 6223; 6232; 22916; 6136; 9349; 6129; 6204; 6181; 6222; 2197; 6169; 6208; 6142; 6135; 6234; 6187	106	105
	2.36184e-11	1.45155e-09	Eukaryotic Translation Termination	Reactome	R-HSA-72764	RPS12; RPS11; RPS10; RPS14; RPL7; RPL4; RPS27A; RPS18; RPS2; RPL27; RPL23; FAU; RPLP2; RPS19; RPS27; RPS24; RPS25; RPL18A; RPLP1; RPS28; RPL10; RPL11; RPL12; RPL38	6124; 6176; 6206; 6233; 6155; 6230; 6134; 6205; 6229; 6223; 6232; 6136; 9349; 6129; 6204; 6181; 6222; 2197; 6169; 6208; 6142; 6135; 6234; 6187	104	103
	2.36184e-11	1.45155e-09	Selenocysteine synthesis	Reactome	R-HSA-2408557	RPS12; RPS11; RPS10; RPS14; RPL7; RPL4; RPS27A; RPS18; RPS2; RPL27; RPL23; FAU; RPLP2; RPS19; RPS27; RPS24; RPS25; RPL18A; RPLP1; RPS28; RPL10; RPL11; RPL12; RPL38	6124; 6176; 6206; 6233; 6155; 6230; 6134; 6205; 6229; 6223; 6232; 6136; 9349; 6129; 6204; 6181; 6222; 2197; 6169; 6208; 6142; 6135; 6234; 6187	104	103
	1.79642e-10	1.05989e-08	Asparagine N-linked glycosylation	Reactome	R-HSA-446203	RPN1; RPN2; DYNLL1; ALG3; CD59; DDOST; RPS27A; MAGT1; SEC23IP; PMM2; DAD1; CANX; TMED10; COPZ1; BET1; TMED3; SEC23A; TMED9; DERL2; BET1L; MGAT2; SEL1L; COPA; CTSC; PDIA3; MAN2A1; MGAT1; CTSZ; LMAN1; LMAN2; STT3A; SEC22B; CALR; TRAPPC4; ARCN1; STX17; GOSR1; GBF1; TFG; FUT8	1650; 821; 9527; 22818; 54732; 10282; 966; 10195; 5373; 2530; 6185; 1314; 10484; 3703; 1522; 811; 51399; 1075; 10960; 9554; 55014; 8655; 3998; 4245; 8729; 6184; 23423; 4124; 11196; 84061; 4247; 6400; 10972; 2923; 372; 10342; 1603; 51009; 6233; 51272	286	285
	2.75068e-10	1.56048e-08	Membrane Trafficking	Reactome	R-HSA-199991	OCRL; DYNLL1; SEC23IP; NECAP2; CTSZ; CHMP4B; CD59; COPA; ARCN1; DNM3; SH3GL1; PLIN3; TMED10; COPZ1; EPS15; BET1; TMED3; SEC23A; YIPF6; TPD52; KIF2A; RAB3IP; TMED9; DNASE2; GCC2; BET1L; SURF4; RAB8B; RPS27A; GAPVD1; ARPC2; CTSC; MAN2A1; ARPC4; AAK1; GGA2; LMAN1; LMAN2; MVB12A; COPS7B; GALNT1; GALNT2; SEC22B; GOSR1; SCOC; RAB31; VAMP7; M6PR; GBF1; KIF5B; TRAPPC4; TXNDC5; ACBD3; CHMP2A; VTI1A; STX17…	8675; 10282; 10226; 64786; 6455; 3799; 2060; 966; 26052; 93343; 4952; 9554; 6845; 10109; 22818; 2590; 1075; 10960; 55014; 7163; 6836; 3267; 11196; 10972; 10342; 10093; 64708; 51272; 54732; 3831; 3796; 2589; 81567; 10484; 9648; 55707; 51399; 8655; 9527; 51762; 372; 4074; 26130; 6233; 1777; 10096; 22848; 1314; 3998; 27243; 128866; 64746; 1522; 143187; 8729; 286451; 117177; 23423; 4124; 23062; 60592…	582	582
	2.95141e-10	1.61234e-08	Metabolism of proteins	Reactome	R-HSA-392499	RPN1; RPN2; TOMM40; RAB4B; HSPA5; SEC23IP; PMM2; DYNLL1; SLC30A7; CANX; TMED10; EIF3H; RPS18; EIF3K; EIF3B; HIST2H2AB; MAP3K7; ATP6AP2; WDR61; NUP210; IARS; P4HB; CTSC; CTSZ; RPL10; RPL11; RPL12; GNPAT; PTRH2; EEF1D; TRAPPC4; ARCN1; NUP107; MRPL46; RBX1; MRPL48; GBF1; NUP205; RPS2; NUP88; RPL7; RPL4; RPS27A; HSP90B1; SEC63; TOMM20; EIF5B; COPZ1; GFER; RUVBL1; DERL2; PDIA6; BET1L; MRPL13; RCN1; MA…	8237; 6155; 5371; 966; 10471; 23165; 2197; 10528; 6885; 80349; 9112; 9255; 1650; 8883; 51564; 53916; 1936; 10159; 84061; 7416; 2671; 9789; 51272; 1938; 5373; 2589; 28998; 5954; 1974; 8667; 6233; 6230; 3309; 6223; 27335; 5611; 23423; 23062; 51009; 7419; 10282; 1933; 4245; 6747; 6696; 6142; 23478; 8443; 6135; 6124; 2159; 8666; 6232; 6185; 7184; 1075; 10960; 6222; 7345; 3376; 11196; 3416; 55014; 232…	2008	1999
	3.80241e-10	2.00305e-08	Immune System	Reactome	R-HSA-168256	TAP1; IFI35; RAB4B; PPP3R1; MAN2B1; FCGR1A; DYNLL1; TXNDC5; TMEM173; CANX; CPPED1; MRC2; HSPA5; TYROBP; MAP3K7; ATP6AP2; HSP90AB1; RNF114; OAS2; ATP6V0D1; GUSB; HLA-DPB1; IFITM1; P4HB; CTSC; CREB1; CTSZ; DBNL; CTSS; PA2G4; KRAS; INPP5D; ORM1; ARPC1B; C1QC; C1QB; C1QA; ABI1; RBX1; TMEM179B; ABCE1; ELMO1; RNF213; HGSNAT; DOCK2; HLA-B; HP; RPS27A; HSP90B1; MGST1; DNM3; ERP44; YPEL5; PPM1B; LILRB1; C…	929; 10549; 5371; 10006; 8635; 966; 3109; 6885; 3106; 834; 3615; 3965; 55905; 1650; 8519; 57674; 53916; 5534; 2212; 81567; 10093; 10312; 3845; 200081; 3430; 3240; 3119; 1974; 10159; 6233; 6773; 11333; 1072; 3309; 3614; 9844; 80301; 7525; 80331; 2444; 3848; 712; 28988; 4939; 6059; 6868; 374395; 3071; 391; 29952; 5004; 960; 3326; 5611; 6772; 7184; 6093; 1075; 302; 10616; 3606; 340061; 9114; 5610; 5…	1840	1827
	2.16631e-09	1.10183e-07	Innate Immune System	Reactome	R-HSA-168249	RAB4B; PPP3R1; MAN2B1; FCGR1A; DYNLL1; TXNDC5; TMEM173; CPPED1; TYROBP; MAP3K7; ATP6AP2; HSP90AB1; ATP6V0D1; GUSB; ALOX5; CTSC; CREB1; CTSZ; CTSS; PA2G4; KRAS; DBNL; ORM1; ARPC1B; C1QC; C1QB; C1QA; TMEM179B; MAVS; ELMO1; MAGT1; DOCK2; HLA-B; HP; RPS27A; HSP90B1; MGST1; DNM3; YPEL5; C4BPA; PIK3R4; SURF4; ARPC2; ARPC4; UBA7; RHOG; PDAP1; DNAJC5; DNAJC3; TCIRG1; CD14; ACTR3; AMPD3; KRT1; HGSNAT; MAP…	3428; 80301; 929; 5795; 10549; 84329; 10006; 8635; 966; 374395; 3071; 138050; 4257; 714; 391; 57506; 26052; 6885; 81494; 3106; 834; 29952; 5004; 960; 6093; 5532; 55313; 10109; 1650; 3326; 1938; 51646; 7184; 4125; 53916; 1075; 3163; 7318; 302; 5534; 2212; 713; 28988; 10159; 6836; 81567; 84061; 9114; 23071; 10093; 967; 5603; 10312; 1385; 3845; 7305; 240; 3240; 1794; 3107; 340061; 8655; 10095; 230; …	1077	1065
	3.1727e-09	1.55991e-07	Translation Factors	Wikipathways	WP107	EIF3H; EIF2S1; EEF1D; EIF2AK2; EIF1AY; EIF3G; EEF1B2; EIF4A1; EIF4H; EEF2; EIF4A2; EIF5B; EIF3B; EIF2S3; EIF2S2	8894; 1968; 1965; 7458; 9669; 9086; 1933; 1936; 1938; 5610; 1974; 1973; 8662; 8666; 8667	50	50
	2.37622e-08	1.0621e-06	Ribosome - Homo sapiens (human)	KEGG	path:hsa03010	RPS12; RPS11; RPS10; RPS14; RPL7; RPS19; RPS18; RPL18A; MRPL13; RPS27A; RPS2; RPL27; RPL23; FAU; RPLP2; RPL4; RPS27; RPS24; RPS25; RPLP1; RPS28; RPL10; RPL11; RPL12; RPL38	6155; 6169; 6176; 6181; 6187; 6204; 6205; 6206; 6208; 6222; 6223; 6229; 6230; 6232; 6233; 6234; 9349; 2197; 28998; 6124; 6129; 6134; 6135; 6136; 6142	153	153
	2.36335e-08	1.0621e-06	N-Glycan biosynthesis	EHMN	N-Glycan biosynthesis	RPN1; RPN2; COPA; ALG3; ARCN1; MGAT1; MGAT2; DDOST; MAN2A1; STT3B; STT3A; DAD1; FUT8	2530; 6185; 372; 4245; 6184; 3703; 201595; 1650; 4124; 4247; 1314; 1603; 10195	42	42
	2.3519e-08	1.0621e-06	Protein export - Homo sapiens (human)	KEGG	path:hsa03060	SEC11A; SEC11C; SRP54; SRPRB; SPCS1; SPCS2; SEC63; SRP68; HSPA5; SEC61B	3309; 28972; 10952; 23478; 9789; 6729; 6730; 90701; 11231; 58477	23	23
	3.93978e-08	1.70917e-06	Transport to the Golgi and subsequent modification	Reactome	R-HSA-948021	DYNLL1; CD59; SEC23IP; TMED10; COPZ1; BET1; TMED3; SEC23A; TMED9; BET1L; MGAT2; COPA; CTSC; MAN2A1; MGAT1; CTSZ; LMAN1; LMAN2; SEC22B; TFG; TRAPPC4; ARCN1; STX17; GOSR1; GBF1; FUT8	10484; 22818; 51272; 4247; 1314; 54732; 10282; 966; 2530; 1522; 11196; 51399; 9527; 1075; 10960; 8655; 3998; 4245; 55014; 8729; 23423; 4124; 10972; 372; 10342; 9554	168	168
	1.72897e-07	7.28638e-06	SNARE interactions in vesicular transport - Homo sapiens (human)	KEGG	path:hsa04130	STX8; BET1; BET1L; VAMP5; VAMP7; SEC22B; STX2; VTI1A; STX17; STX16; GOSR1	2054; 9482; 10791; 10282; 9527; 6845; 51272; 9554; 143187; 8675; 55014	34	34
	2.261e-07	9.01344e-06	ER to Golgi Anterograde Transport	Reactome	R-HSA-199977	DYNLL1; CD59; SEC23IP; TMED10; COPZ1; BET1; TMED3; SEC23A; TMED9; BET1L; COPA; CTSC; CTSZ; LMAN1; LMAN2; SEC22B; TFG; TRAPPC4; ARCN1; STX17; GOSR1; GBF1	10484; 22818; 51272; 1314; 54732; 10282; 966; 1522; 11196; 51399; 9527; 1075; 10960; 8655; 3998; 55014; 8729; 23423; 10972; 372; 10342; 9554	137	137
	2.23173e-07	9.01344e-06	RNA transport - Homo sapiens (human)	KEGG	path:hsa03013	NUP88; NCBP2; EIF5B; EIF2S3; EIF2S2; EIF3H; EIF2S1; EIF3B; EIF1AY; EIF3G; RNPS1; NUP210; XPOT; NUP107; ALYREF; RANGAP1; FXR1; FXR2; THOC2; UBE2I; EIF4A1; MAGOHB; TRNT1; NUP205; EIF4A2	23165; 7329; 10921; 23225; 8894; 11260; 9513; 5905; 57122; 4927; 55110; 57187; 9086; 22916; 8087; 51095; 1965; 1968; 1973; 1974; 9669; 10189; 8662; 8666; 8667	171	171
	3.57637e-07	1.3882e-05	miR-targeted genes in muscle cell - TarBase	Wikipathways	WP2005	SNX6; ACP2; MYO1E; P4HA2; CHMP2A; MAGT1; TMED10; BET1; SRPRB; CHORDC1; MPZL1; DNAJB1; NCEH1; CBFB; PTBP2; SEC23A; CTSC; MRC2; HMGA1; CPOX; TMEM109; LRP1; TMED3; CAPG; RHOG; GALNT1; TMEM87A; KRAS; NAA15; CCND1; NCL; ARCN1; PPIB; PXDN; KPNA3; GNA13; CDK6; PPIF; IPO4; RHEB; PTPRJ; TMEM43	10105; 3337; 595; 6009; 26973; 5795; 80155; 79711; 1371; 10282; 3839; 4035; 9902; 3845; 372; 8974; 822; 391; 9019; 10972; 3159; 865; 84061; 58533; 58155; 58477; 79188; 2589; 23423; 10484; 5479; 1075; 4643; 53; 25963; 27243; 1021; 79073; 57552; 10672; 7837; 4691	400	400
	9.47056e-07	3.58181e-05	miR-targeted genes in lymphocytes - TarBase	Wikipathways	WP2004	ACP2; SNX6; PPP3R1; MYO1E; P4HA2; CHMP2A; MAGT1; SERPINE2; TMED10; BET1; SRPRB; CHORDC1; MPZL1; DNAJB1; PRPF40A; NCEH1; ATG3; CBFB; UTP15; PTBP2; FXR2; ANXA2; SEC23A; CTSC; MRC2; HMGA1; CPOX; TMEM109; TMED3; CAPG; RHOG; GALNT1; KRAS; NAA15; CCND1; NCL; ARCN1; PPIB; PXDN; KPNA3; GNA13; CDK6; PPIF; IPO4; RHEB; PTPRJ; TMEM43	10105; 3337; 595; 64422; 26973; 5795; 58533; 5534; 80155; 79711; 1371; 10282; 3839; 9902; 3845; 372; 8974; 822; 391; 9019; 10972; 3159; 865; 84061; 55660; 58155; 58477; 79188; 57552; 2589; 6009; 23423; 10484; 5479; 5270; 1075; 53; 4643; 84135; 302; 27243; 1021; 79073; 10672; 7837; 4691; 9513	489	489
	1.25856e-06	4.64093e-05	Phagosome - Homo sapiens (human)	KEGG	path:hsa04145	TAP1; HLA-C; HLA-B; FCGR1A; CANX; MSR1; MRC2; ATP6AP1; HLA-DQB1; ATP6V0D1; HLA-DPB1; HLA-DRB1; FCGR2B; FCGR2A; CTSS; SEC61B; SEC22B; CALR; TCIRG1; CD14; HLA-DMB; M6PR	537; 3106; 3107; 3109; 3115; 3119; 3123; 10312; 6890; 2209; 2212; 2213; 9902; 10952; 811; 929; 821; 9554; 4481; 9114; 4074; 1520	152	151
	2.24892e-06	8.09062e-05	TYROBP Causal Network	Wikipathways	WP3945	IL18; NCKAP1L; APBB1IP; DPYD; TYROBP; C1QC; TCIRG1; SPP1; PYCARD; HCLS1; SLC1A5; CAPG; PLEK	3606; 7305; 6510; 10312; 714; 3071; 3059; 1806; 5341; 29108; 54518; 6696; 822	60	60
	3.705e-06	0.000130116	Infectious disease	Reactome	R-HSA-5663205	NUP88; APOBEC3F; NCBP2; DOCK2; CHMP4B; RPS27A; MAP2K2; CHMP2A; TAF15; POLR2L; SH3GL1; CANX; EPS15; RANBP1; PABPN1; NUP107; RANGAP1; HMGA1; HCK; MVB12A; NUP210; CALR; EIF2AK2; KPNA3; NUP205; KPNA1; RBX1; ELMO1; EEF2	4927; 821; 23225; 5605; 57122; 1938; 6455; 22916; 27243; 9844; 3055; 1794; 811; 9978; 8106; 5905; 23165; 128866; 2060; 3836; 5902; 93343; 8148; 3159; 5441; 5610; 200316; 3839; 6233	253	251
	3.8123e-06	0.000130771	Intra-Golgi and retrograde Golgi-to-ER traffic	Reactome	R-HSA-6811442	DYNLL1; KIF2A; PLIN3; TMED10; COPZ1; TMED3; TMED9; GCC2; BET1L; SURF4; COPA; MAN2A1; GALNT1; GALNT2; SEC22B; SCOC; KIF5B; ARCN1; VTI1A; STX16; KLC1; GOSR1; GBF1; M6PR	8675; 22818; 51272; 1314; 54732; 3796; 2590; 2589; 3831; 10226; 9648; 8655; 143187; 3799; 8729; 23423; 4124; 6836; 9527; 10972; 372; 9554; 4074; 60592	186	186
	4.50745e-06	0.000151102	Processing of Capped Intron-Containing Pre-mRNA	Reactome	R-HSA-72203	NUP88; SYF2; NCBP2; SF3B5; CSTF2T; SF1; PPIL1; POLR2L; GPKOW; BCAS2; PRPF4; SRSF5; PRPF40A; LSM4; SNRNP70; NUP210; PABPN1; RNPS1; NUP107; SMNDC1; ALYREF; USP39; THOC2; SF3B2; DDX23; MAGOHB; YBX1; NUP205	10286; 7536; 10921; 10285; 83443; 4904; 23225; 57122; 10713; 25949; 57187; 22916; 10992; 4927; 6625; 8106; 51645; 55110; 23165; 9416; 23283; 25804; 55660; 6430; 5441; 27238; 9128; 10189	240	240
	5.10997e-06	0.000167493	Staphylococcus aureus infection - Homo sapiens (human)	KEGG	path:hsa05150	HLA-DPB1; C1QC; HLA-DRB1; FCGR2B; C1QB; C1QA; FCGR2A; HLA-DQB1; FCGR1A; KRT10; C1S; HLA-DMB	3858; 2209; 2212; 2213; 3115; 3119; 3123; 712; 713; 714; 716; 3109	56	55
	5.91009e-06	0.000189508	mRNA Splicing - Major Pathway	Reactome	R-HSA-72163	SYF2; NCBP2; SF3B5; CSTF2T; SF1; PPIL1; GPKOW; BCAS2; PRPF4; SRSF5; PRPF40A; LSM4; SNRNP70; PABPN1; RNPS1; SMNDC1; ALYREF; USP39; POLR2L; SF3B2; DDX23; MAGOHB; YBX1	10286; 7536; 10921; 10285; 83443; 4904; 55660; 10713; 25949; 22916; 10992; 6625; 51645; 8106; 55110; 9416; 23283; 25804; 6430; 5441; 27238; 9128; 10189	178	178
	6.40287e-06	0.000200941	miR-targeted genes in leukocytes - TarBase	Wikipathways	WP2003	MRC2; ANXA2; TMED3; SNX6; ACP2; GNA13; CHORDC1; DNAJB1; CTSC; TMEM109; ARCN1; HMGA1; TMEM43; PRPF40A; CDK6; PPIF; CAPG; RHOG; PPIB; SERPINE2; TMED10	10105; 5479; 5270; 1075; 58533; 3337; 9902; 53; 372; 391; 10972; 55660; 302; 3159; 822; 79188; 1021; 26973; 79073; 10672; 23423	154	154
	6.72779e-06	0.000206739	Antigen Presentation: Folding, assembly and peptide loading of class I MHC	Reactome	R-HSA-983170	TAP1; SEC23A; HSPA5; HLA-C; HLA-B; CALR; PDIA3; CANX	2923; 10484; 6890; 3107; 821; 811; 3106; 3309	24	24
	8.24124e-06	0.000248078	Antigen processing and presentation - Homo sapiens (human)	KEGG	path:hsa04612	TAP1; HLA-DPB1; HSPA5; HLA-C; HLA-B; CALR; HLA-DRB1; PDIA3; CREB1; HSP90AB1; HLA-DQB1; CTSS; HLA-DMB; CANX	3309; 3106; 3107; 3109; 811; 3119; 3123; 821; 1520; 2923; 3115; 6890; 3326; 1385	77	77
	9.61009e-06	0.000277939	Interferon Signaling	Reactome	R-HSA-913531	HLA-DPB1; IFITM1; HLA-DRB1; STAT2; STAT1; UBA7; HLA-C; HLA-B; IFI35; EIF4A2; ISG20; OAS2; HLA-DQB1; EIF2AK2; FCGR1A; CD44; PML; PTPN1; ABCE1; EIF4A1; PPM1B	6773; 3106; 5495; 5371; 5770; 6059; 3669; 8519; 6772; 3430; 3107; 3123; 7318; 2209; 3119; 1974; 5610; 1973; 960; 3115; 4939	158	158
	9.44989e-06	0.000277939	N-Glycan biosynthesis - Homo sapiens (human)	KEGG	path:hsa00510	RPN1; RPN2; ALG3; MAN2A1; MGAT1; MGAT2; DDOST; STT3B; STT3A; DAD1; FUT8	4247; 4245; 4124; 6184; 6185; 1650; 1603; 10195; 2530; 3703; 201595	49	49
	1.00761e-05	0.000285813	Influenza A - Homo sapiens (human)	KEGG	path:hsa05164	MAP2K2; MAPK13; VDAC1; EIF2S1; STAT2; STAT1; DNAJB1; OAS2; HLA-DQB1; PML; PYCARD; HLA-DPB1; PABPN1; HLA-DRB1; IL18; CASP1; EIF2AK2; DNAJC3; KPNA1; MAVS; HLA-DMB; AGFG1	3606; 3109; 3119; 3123; 6772; 6773; 57506; 3267; 7416; 5371; 3836; 3115; 3337; 834; 8106; 1965; 29108; 4939; 5603; 5605; 5610; 5611	171	171
	1.15456e-05	0.000321317	COPII-mediated vesicle transport	Reactome	R-HSA-204005	SEC22B; BET1; CD59; SEC23A; TFG; CTSC; TRAPPC4; CTSZ; LMAN1; STX17; LMAN2; SEC23IP; TMED10	3998; 10972; 10484; 1075; 10342; 9554; 55014; 1522; 966; 51399; 10960; 10282; 11196	69	69
	1.23442e-05	0.000337179	mRNA Splicing	Reactome	R-HSA-72172	SYF2; NCBP2; SF3B5; CSTF2T; SF1; PPIL1; GPKOW; BCAS2; PRPF4; SRSF5; PRPF40A; LSM4; SNRNP70; PABPN1; RNPS1; SMNDC1; ALYREF; USP39; POLR2L; SF3B2; DDX23; MAGOHB; YBX1	10286; 7536; 10921; 10285; 83443; 4904; 55660; 10713; 25949; 22916; 10992; 6625; 8106; 55110; 51645; 9416; 23283; 25804; 6430; 5441; 27238; 9128; 10189	186	186
	2.1881e-05	0.000586808	miR-targeted genes in epithelium - TarBase	Wikipathways	WP2002	SNX6; ACP2; MYO1E; P4HA2; CHMP2A; MAGT1; SERPINE2; TMED10; MRC2; TMED3; PXDN; DNAJB1; PRPF40A; ATG3; UTP15; ANXA2; CTSC; TMEM109; CAPG; GALNT1; KRAS; LRP1; CCND1; MPZL1; ARCN1; NCL; GNA13; CDK6; PPIF; IPO4; RHEB; PPIB; TMEM43	10105; 6009; 5479; 1075; 595; 9902; 53; 3845; 8974; 822; 10972; 84135; 64422; 4643; 302; 27243; 5270; 372; 3337; 79188; 2589; 1021; 79073; 84061; 10672; 7837; 58533; 23423; 55660; 9019; 4691; 4035; 79711	333	333
	3.14268e-05	0.00082776	Metabolism of amino acids and derivatives	Reactome	R-HSA-71291	RPS12; RPS11; RPS10; RPS14; RPL7; RPLP1; RPS18; RPL18A; AIMP1; RPS25; RPS27A; RPS2; BCKDK; RPL27; RPL23; FAU; RPLP2; IL4I1; RPL4; RPS27; RPS24; IARS; RPS28; SRM; RPL10; RPL11; RPL12; ETHE1; RPL38; ASNS; RPS19; NNMT; AHCY	6155; 6229; 191; 2197; 6208; 4837; 6142; 6135; 6124; 259307; 9255; 6232; 6136; 6129; 6204; 6222; 3376; 6234; 6187; 440; 23474; 6176; 6206; 10295; 6181; 6169; 6233; 6230; 6134; 6205; 6223; 9349; 6723	342	339
	3.21102e-05	0.000830922	miR-targeted genes in squamous cell - TarBase	Wikipathways	WP2006	BET1; ANXA2; SRPRB; PXDN; MPZL1; DNAJB1; SEC23A; MRC2; PRPF40A; HMGA1; P4HA2; CBFB; CHMP2A; MAGT1; ARCN1; NCL; RHEB; GALNT1; TMEM43; TMED10	10282; 3337; 9902; 55660; 8974; 9019; 10972; 302; 3159; 372; 6009; 27243; 58477; 79188; 2589; 865; 84061; 4691; 7837; 10484	158	158
	3.5637e-05	0.000906285	Spliceosome - Homo sapiens (human)	KEGG	path:hsa03040	DDX23; SRSF5; SYF2; NCBP2; PPIL1; SMNDC1; MAGOHB; USP39; TCERG1; ALYREF; PRPF40A; SF3B2; LSM4; SF3B5; THOC2; SNRNP70; BCAS2; PRPF4	10285; 10286; 55660; 10915; 9416; 25804; 22916; 6430; 55110; 25949; 57187; 10992; 9128; 51645; 10189; 10713; 6625; 83443	134	134
	3.99972e-05	0.000999931	Epstein-Barr virus infection - Homo sapiens (human)	KEGG	path:hsa05169	TAP1; HLA-C; HLA-B; MAPK13; STAT2; STAT1; MAP3K7; OAS2; HLA-DQB1; LYN; HLA-DPB1; CD44; HLA-DRB1; PDIA3; CD40; CCND1; CALR; EIF2AK2; BAK1; CDK4; CDK6; MAVS; HLA-DMB	3107; 3109; 3119; 3123; 578; 595; 6772; 6773; 57506; 3106; 6885; 6890; 3115; 4067; 811; 4939; 2923; 958; 960; 5603; 5610; 1019; 1021	201	200
	4.52906e-05	0.00111339	Host Interactions of HIV factors	Reactome	R-HSA-162909	NUP88; RPS27A; NUP107; DOCK2; RANBP1; APOBEC3F; RANGAP1; HMGA1; KPNA1; RBX1; HCK; NUP210; ELMO1; NUP205	23225; 57122; 4927; 9844; 3055; 1794; 9978; 5905; 23165; 3836; 5902; 3159; 200316; 6233	89	89
	4.67574e-05	0.00113061	eukaryotic protein translation	BioCarta	eifpathway	EIF5B; EIF4A1; EIF2S2; EIF2S1; EIF2S3; EIF4A2	9669; 1965; 8894; 1968; 1974; 1973	17	16
	5.14356e-05	0.00118543	Fc gamma R-mediated phagocytosis - Homo sapiens (human)	KEGG	path:hsa04666	INPP5D; CFL1; DOCK2; ARPC1B; FCGR2B; FCGR2A; MARCKS; PTPRC; CFL2; FCGR1A; ARPC2; HCK; LYN; ARPC4	1072; 1073; 3635; 5788; 2209; 2212; 2213; 1794; 10093; 10095; 10109; 4067; 3055; 4082	91	90
	5.09069e-05	0.00118543	rRNA modification in the nucleus and cytosol	Reactome	R-HSA-6790901	WDR3; RPS14; RRP9; NOP56; RRP7A; NHP2; RPS2; UTP15; GAR1; WDR75; FBL	55651; 54433; 6187; 2091; 10528; 10885; 9136; 6208; 27341; 84135; 84128	59	58
	5.09069e-05	0.00118543	rRNA processing in the nucleus and cytosol	Reactome	R-HSA-8868773	WDR3; RPS14; RRP9; NOP56; RRP7A; NHP2; RPS2; UTP15; GAR1; WDR75; FBL	55651; 54433; 6187; 2091; 10528; 10885; 9136; 6208; 27341; 84135; 84128	59	58
	5.78874e-05	0.0013136	Antigen processing-Cross presentation	Reactome	R-HSA-1236975	TAP1; SEC22B; MRC2; HLA-C; HLA-B; CALR; CD14; FCGR1A; CTSS; SEC61B	9902; 929; 3106; 9554; 6890; 2209; 3107; 811; 10952; 1520	49	49
	6.04296e-05	0.00135051	Microglia Pathogen Phagocytosis Pathway	Wikipathways	WP3937	NCKAP1L; TYROBP; ARPC1B; C1QC; C1QB; C1QA; FCGR1A; HCK; LYN	4067; 2209; 714; 713; 712; 3071; 3055; 10095; 7305	40	40
	6.29732e-05	0.00138635	Disease	Reactome	R-HSA-1643685	NUP88; APOBEC3F; AGK; HDAC7; DOCK2; CHMP4B; RPS27A; SEL1L; MAP2K2; CHMP2A; TAF15; ADAM17; APBB1IP; SH3GL1; CANX; EPS15; NCBP2; STAT1; RANBP1; POLR2L; DERL2; ZC3HAV1; NUP210; CDK5; PABPN1; NUP107; ERLEC1; RANGAP1; CREB1; HMGA1; FXR1; HCK; MVB12A; KRAS; PHB; CALR; EIF2AK2; KPNA3; NUP205; KPNA1; RBX1; ELMO1; EEF2	5605; 6868; 23165; 128866; 2060; 93343; 8148; 56829; 200316; 57122; 821; 51564; 6772; 3055; 811; 5245; 3836; 5610; 1020; 23225; 1385; 1938; 3845; 22916; 1794; 8106; 27248; 5905; 8087; 5902; 6400; 3159; 5441; 6233; 6455; 55750; 4927; 27243; 9844; 9978; 54518; 51009; 3839	510	508
	8.83526e-05	0.00191647	Cargo concentration in the ER	Reactome	R-HSA-5694530	SEC22B; CTSC; SEC23A; CD59; CTSZ; LMAN1; LMAN2; TMED10	966; 3998; 10972; 10484; 9554; 1522; 1075; 10960	33	33
	0.000112023	0.0023947	Influenza Infection	Reactome	R-HSA-168254	NUP88; PABPN1; NUP107; CALR; EIF2AK2; KPNA3; NUP205; KPNA1; POLR2L; NUP210; CANX	23165; 5441; 4927; 5610; 3836; 821; 23225; 3839; 811; 57122; 8106	63	63
	0.000121642	0.00256317	Cytokine Signaling in Immune system	Reactome	R-HSA-1280215	HLA-C; HLA-B; RPS27A; IL5RA; FCGR1A; ADAM17; YES1; PPM1B; STAT1; MAP3K7; OAS2; HLA-DQB1; CANX; PML; LYN; HLA-DPB1; IFITM1; IFI35; CD44; P4HB; HLA-DRB1; CD40; CREB1; UBA7; LGALS9; TXLNA; HCK; PTPN1; STAT2; IL18; INPP5D; VAMP7; CASP1; EIF2AK2; ISG20; RBX1; ABCE1; EIF4A1; EIF4A2	5495; 3106; 5371; 6059; 8519; 6868; 834; 5034; 2209; 6885; 960; 6845; 3965; 821; 6772; 3055; 3123; 7525; 7318; 3606; 5770; 1385; 200081; 3430; 958; 3107; 3635; 3119; 3568; 1974; 6233; 4067; 6773; 5610; 3669; 9978; 1973; 3115; 4939	458	458
	0.000129814	0.00269683	rRNA processing	Reactome	R-HSA-72312	WDR3; RPS14; RRP9; NOP56; RRP7A; NHP2; RPS2; UTP15; GAR1; WDR75; FBL	55651; 54433; 6187; 2091; 10528; 10885; 9136; 6208; 27341; 84135; 84128	65	64
	0.00013288	0.0027222	Synthesis, secretion, and inactivation of Glucagon-like Peptide-1 (GLP-1)	Reactome	R-HSA-381771	SEC11A; SEC11C; SPCS1; SPCS2	28972; 90701; 23478; 9789	7	7
	0.000138201	0.00279242	EPHB-mediated forward signaling	Reactome	R-HSA-3928662	ARPC2; ROCK1; ARPC4; CFL1; ARPC1B; LYN; ACTR3; YES1	4067; 10096; 10109; 10095; 6093; 7525; 1072; 10093	35	35
	0.000155653	0.00310254	Photodynamic therapy-induced unfolded protein response	Wikipathways	WP3613	HSPA5; PDIA6; CALR; ASNS; HSP90B1; DNAJC3; DNAJB11	5611; 3309; 811; 10130; 440; 7184; 51726	27	27
	0.000172669	0.00339582	Tuberculosis - Homo sapiens (human)	KEGG	path:hsa05152	IL18; HLA-DPB1; MRC2; PPP3R1; STAT1; FCGR2B; LSP1; HLA-DRB1; ATP6AP1; CREB1; FCGR2A; TCIRG1; CD14; HLA-DQB1; FCGR1A; MAPK13; ATP6V0D1; CTSS; HLA-DMB; PPP3CB	3606; 537; 3109; 3115; 3119; 3123; 6772; 1385; 2209; 10312; 2212; 9902; 2213; 9114; 5532; 5534; 929; 4046; 5603; 1520	179	178
	0.000193622	0.00370899	Hedgehog ligand biogenesis	Reactome	R-HSA-5358346	SEL1L; P4HB; RPS27A; DERL2; ADAM17; ERLEC1	6868; 6400; 51009; 6233; 27248; 5034	20	20
	0.000193622	0.00370899	Mitochondrial calcium ion transport	Reactome	R-HSA-8949215	PHB; LETM1; VDAC3; VDAC2; VDAC1; MICU2	7416; 3954; 7417; 7419; 5245; 221154	20	20
	0.000240904	0.00455556	Golgi-to-ER retrograde transport	Reactome	R-HSA-8856688	COPZ1; SEC22B; COPA; DYNLL1; GBF1; KIF5B; TMED9; SURF4; ARCN1; TMED3; KLC1; KIF2A; GALNT1; GALNT2; TMED10	1314; 22818; 54732; 3831; 3796; 2590; 2589; 8655; 3799; 8729; 23423; 6836; 10972; 372; 9554	116	116
	0.000256196	0.0047834	Synthesis, secretion, and inactivation of Glucose-dependent Insulinotropic Polypeptide (GIP)	Reactome	R-HSA-400511	SEC11A; SEC11C; SPCS1; SPCS2	28972; 90701; 23478; 9789	8	8
	0.000317476	0.0057812	TCR	NetPath	Pathway_TCR	LPXN; DOCK2; MAP2K2; HDAC7; STAT1; MPZL1; DNAJB1; ARHGEF2; HSP90AB1; PTPRC; LYN; DGKA; ANXA2; CREB1; STK4; INPP5D; DEF6; SNRNP70; DBNL; NCL; STK39; PPP3CB; AHCY; ELMO1	4067; 1606; 6625; 4691; 6772; 5605; 1385; 3326; 9404; 51564; 50619; 3337; 1794; 5788; 3635; 6789; 302; 9019; 191; 28988; 27347; 5532; 9844; 9181	245	244
	0.000314763	0.0057812	COPI-dependent Golgi-to-ER retrograde traffic	Reactome	R-HSA-6811434	COPZ1; SEC22B; COPA; TMED3; KIF2A; KIF5B; TMED9; ARCN1; KLC1; GBF1; SURF4; TMED10	3796; 10972; 3799; 9554; 8729; 1314; 23423; 22818; 6836; 54732; 3831; 372	82	82
	0.00035307	0.00635095	COPI-mediated anterograde transport	Reactome	R-HSA-6807878	COPZ1; BET1; COPA; DYNLL1; CD59; TMED9; ARCN1; GOSR1; TMED3; BET1L; GBF1; TMED10	8655; 8729; 966; 1314; 23423; 51272; 22818; 54732; 10972; 372; 10282; 9527	83	83
	0.000379674	0.00666689	Clathrin derived vesicle budding	Reactome	R-HSA-421837	OCRL; VAMP7; TPD52; TXNDC5; ACBD3; DNASE2; CTSZ; CHMP2A; M6PR; GBF1; YIPF6	4952; 27243; 6845; 8729; 286451; 64746; 4074; 1522; 7163; 81567; 1777	72	72
	0.000379674	0.00666689	trans-Golgi Network Vesicle Budding	Reactome	R-HSA-199992	OCRL; VAMP7; TPD52; TXNDC5; ACBD3; DNASE2; CTSZ; CHMP2A; M6PR; GBF1; YIPF6	4952; 27243; 6845; 8729; 286451; 64746; 4074; 1522; 7163; 81567; 1777	72	72
	0.000392912	0.00681817	double stranded rna induced gene expression	BioCarta	rnapathway	EIF2AK2; EIF2S1; DNAJC3; EIF2S3; EIF2S2	1965; 8894; 1968; 5610; 5611	15	15
	0.000444581	0.00753743	Incretin synthesis, secretion, and inactivation	Reactome	R-HSA-400508	SEC11A; SEC11C; SPCS1; SPCS2	28972; 90701; 23478; 9789	9	9
	0.000441057	0.00753743	Binding and Uptake of Ligands by Scavenger Receptors	Reactome	R-HSA-2173782	CALR; LRP1; HSPH1; HPR; CD163; HSP90B1; HP; MSR1	3250; 9332; 3240; 811; 4035; 4481; 10808; 7184	41	41
	0.000457922	0.00767539	Lysosome - Homo sapiens (human)	KEGG	path:hsa04142	CTSS; CD63; ACP2; MAN2B1; CTSC; ATP6AP1; TCIRG1; DNASE2; CTSZ; GGA2; HGSNAT; ATP6V0D1; GUSB; IDUA; M6PR	23062; 537; 4125; 1075; 53; 10312; 1777; 138050; 3425; 4074; 9114; 2990; 967; 1520; 1522	123	123
	0.000576243	0.00934021	HIV Infection	Reactome	R-HSA-162906	NUP88; RPS27A; TAF15; NCBP2; NUP107; DOCK2; RANBP1; CHMP4B; APOBEC3F; RANGAP1; HMGA1; POLR2L; CHMP2A; KPNA1; RBX1; HCK; MVB12A; NUP210; ELMO1; NUP205	23225; 57122; 22916; 27243; 9844; 3055; 4927; 1794; 9978; 5905; 23165; 128866; 3836; 5902; 93343; 8148; 3159; 5441; 200316; 6233	197	195
	0.000575553	0.00934021	Nicotinate metabolism	Reactome	R-HSA-196807	NADK; CD38; NADSYN1; NAMPT; NNMT; NADK2	133686; 10135; 65220; 4837; 55191; 952	25	24
	0.000575553	0.00934021	Calnexin/calreticulin cycle	Reactome	R-HSA-901042	SEL1L; CALR; RPS27A; PDIA3; DERL2; CANX	6400; 2923; 51009; 821; 811; 6233	25	24
	0.000610545	0.00978864	Pertussis - Homo sapiens (human)	KEGG	path:hsa05133	CASP1; C4BPA; C1QC; C1QB; C1QA; CD14; CFL2; CFL1; MAPK13; C1S; PYCARD	1072; 1073; 29108; 834; 929; 712; 713; 714; 716; 722; 5603	76	76
	0.000644741	0.0101169	PDGFR-beta signaling pathway	PID	pdgfrbpathway	LRP1; STAT1; ARPC4; ARPC2; ABI1; PTPRJ; MAP2K2; ARPC1B; HCK; PTPN1; EIF2AK2; ACTR3; LYN; YES1; KRAS	4067; 10096; 10109; 5795; 5605; 5770; 4035; 3845; 10006; 6772; 3055; 7525; 10095; 5610; 10093	127	127
	0.000644741	0.0101169	mRNA Processing	Wikipathways	WP411	SRSF5; PABPN1; SRP54; RNPS1; NCBP2; SF3B5; PRMT1; CSTF2T; PRPF40A; SF3B2; PTBP2; SNRNP70; YBX1; PRPF4; TMED10	6729; 83443; 4904; 23283; 22916; 58155; 10972; 9128; 6430; 10992; 3276; 10921; 8106; 6625; 55660	127	127
	0.000714384	0.0110917	NS1 Mediated Effects on Host Pathways	Reactome	R-HSA-168276	PABPN1; EIF2AK2; KPNA3; KPNA1	5610; 3839; 8106; 3836	10	10
	0.000874101	0.0134302	ATF6 (ATF6-alpha) activates chaperone genes	Wikipathways	WP2655	CALR; HSPA5; HSP90B1	811; 7184; 3309	5	5
	0.00102321	0.0155591	Human T-cell leukemia virus 1 infection - Homo sapiens (human)	KEGG	path:hsa05166	CDKN2C; PPP3R1; HLA-DPB1; HLA-C; HLA-B; CALR; HLA-DRB1; CD40; CREB1; RANBP1; CCND1; CDK4; HLA-DQB1; MAP2K2; VDAC3; VDAC2; VDAC1; HLA-DMB; PPP3CB; CANX; KRAS	1031; 3106; 3107; 3109; 3115; 3119; 3123; 595; 7416; 7417; 7419; 3845; 5902; 811; 821; 1385; 5532; 5534; 958; 5605; 1019	219	219
	0.00108239	0.0158072	regulation of eif2	BioCarta	eif2pathway	EIF2AK2; EIF2S1; EIF2S3; EIF2S2	1965; 8894; 1968; 5610	11	11
	0.00108239	0.0158072	Hh mutants that don,t undergo autocatalytic processing are degraded by ERAD	Reactome	R-HSA-5362768	SEL1L; RPS27A; ERLEC1; DERL2	6400; 51009; 6233; 27248	11	11
	0.00108239	0.0158072	Hh mutants abrogate ligand secretion	Reactome	R-HSA-5387390	SEL1L; RPS27A; ERLEC1; DERL2	6400; 51009; 6233; 27248	11	11
	0.00108239	0.0158072	Synthesis, secretion, and deacylation of Ghrelin	Reactome	R-HSA-422085	SEC11A; SEC11C; SPCS1; SPCS2	90701; 28972; 23478; 9789	11	11
	0.00112818	0.0163144	Response to elevated platelet cytosolic Ca2+	Reactome	R-HSA-76005	CD63; MANF; HSPA5; FAM49B; TMSB4X; MAGED2; FAM3C; CALU; ECM1; LGALS3BP; STXBP3; CFL1; F13A1; PLEK; ORM1	10447; 6814; 7873; 3959; 2162; 1072; 3309; 51571; 1893; 5341; 813; 10916; 5004; 7114; 967	134	134
	0.0011858	0.0169811	Interferon alpha/beta signaling	Reactome	R-HSA-909733	IFITM1; STAT2; STAT1; HLA-C; HLA-B; IFI35; OAS2; ISG20; PTPN1; ABCE1	6773; 6772; 3430; 3107; 6059; 3106; 3669; 8519; 4939; 5770	70	70
	0.0012157	0.0172419	Allograft rejection - Homo sapiens (human)	KEGG	path:hsa05330	HLA-DPB1; HLA-C; HLA-B; HLA-DRB1; CD40; HLA-DQB1; HLA-DMB	3119; 3106; 3107; 3109; 3115; 3123; 958	38	37
	0.00128695	0.0180785	MHC class II antigen presentation	Reactome	R-HSA-2132295	HLA-DPB1; HLA-DRB1; SEC23A; CTSC; HLA-DQB1; DNM3; CTSS; HLA-DMB; CANX	3109; 1520; 3115; 10484; 1075; 821; 26052; 3119; 3123	59	59
	0.00152147	0.0211714	Clathrin-mediated endocytosis	Reactome	R-HSA-8856828	OCRL; EPS15; ACTR3; VAMP7; NECAP2; ARPC2; RPS27A; DNM3; ARPC4; GAPVD1; AAK1; SH3GL1; M6PR; COPS7B; AGFG1	10096; 10109; 64708; 6845; 55707; 2060; 3267; 6455; 10093; 4952; 22848; 4074; 26052; 26130; 6233	138	138
	0.00156552	0.0211848	Host Interactions with Influenza Factors	Reactome	R-HSA-168253	PABPN1; EIF2AK2; KPNA3; KPNA1	5610; 3839; 8106; 3836	12	12
	0.00156552	0.0211848	Scavenging of heme from plasma	Reactome	R-HSA-2168880	HPR; CD163; LRP1; HP	9332; 4035; 3250; 3240	12	12
	0.00156552	0.0211848	how does salmonella hijack a cell	BioCarta	salmonellapathway	ARPC2; ARPC4; ACTR3; ARPC1B	10109; 10095; 10093; 10096	12	12
	0.00164422	0.0220475	Transport of Mature mRNA derived from an Intron-Containing Transcript	Reactome	R-HSA-159236	NUP88; SRSF5; RNPS1; NCBP2; NUP107; MAGOHB; ALYREF; THOC2; NUP210; NUP205	57187; 10921; 55110; 22916; 4927; 23165; 10189; 23225; 57122; 6430	73	73
	0.00168217	0.0223531	NOD-like receptor signaling pathway - Homo sapiens (human)	KEGG	path:hsa04621	IL18; STAT2; STAT1; CASP1; MAPK13; MAP3K7; NAMPT; HSP90AB1; IFI16; OAS2; RBCK1; PYCARD; VDAC3; VDAC2; VDAC1; MAVS; TMEM173	3606; 340061; 6772; 6773; 57506; 10616; 6885; 7416; 7417; 7419; 3326; 834; 3428; 10135; 29108; 4939; 5603	168	168
	0.00173204	0.0228104	Salmonella infection - Homo sapiens (human)	KEGG	path:hsa05132	IL18; CASP1; ARPC1B; MAPK13; ROCK1; ARPC4; CD14; ARPC2; PYCARD; RHOG; KLC1	3606; 834; 10093; 10095; 10109; 391; 929; 29108; 3831; 6093; 5603	86	86
	0.00190339	0.0248452	Validated targets of C-MYC transcriptional activation	PID	myc_activpathway	RUVBL1; NME1; EIF4A1; HMGA1; NCL; RPL11; NDUFAF2; CDK4; MTDH; EIF2S1; MTA1	92140; 4691; 9112; 8607; 1965; 4830; 1019; 3159; 6135; 1973; 91942	87	87
	0.00193942	0.0250933	Herpes simplex infection - Homo sapiens (human)	KEGG	path:hsa05168	TAP1; HLA-DPB1; EIF2AK2; STAT2; STAT1; HLA-C; HLA-B; EEF1D; HLA-DRB1; MAP3K7; ALYREF; OAS2; HLA-DQB1; PML; SRSF5; EIF2S1; MAVS; HLA-DMB	3109; 3115; 3119; 3123; 3106; 6772; 6773; 57506; 3107; 6885; 6890; 5371; 6430; 4939; 1936; 1965; 10189; 5610	185	185
	0.0020131	0.0253789	ISG15 antiviral mechanism	Reactome	R-HSA-1169408	PPM1B; STAT1; EIF2AK2; UBA7; EIF4A1; EIF4A2	1974; 6772; 5610; 5495; 1973; 7318	30	30
	0.0020131	0.0253789	Antiviral mechanism by IFN-stimulated genes	Reactome	R-HSA-1169410	PPM1B; STAT1; EIF2AK2; UBA7; EIF4A1; EIF4A2	1974; 6772; 5610; 5495; 1973; 7318	30	30
	0.0020131	0.0253789	Nicotinate and nicotinamide metabolism - Homo sapiens (human)	KEGG	path:hsa00760	CD38; NADK; NAMPT; NADSYN1; NNMT; NADK2	10135; 55191; 133686; 952; 65220; 4837	30	30
	0.00206564	0.0253901	Assembly of Viral Components at the Budding Site	Reactome	R-HSA-168316	CALR; CANX	811; 821	2	2
	0.00206564	0.0253901	Virus Assembly and Release	Reactome	R-HSA-168268	CALR; CANX	811; 821	2	2
	0.00205901	0.0253901	Kaposi sarcoma-associated herpesvirus infection - Homo sapiens (human)	KEGG	path:hsa05167	STAT2; STAT1; ATG3; HLA-C; HLA-B; PPP3R1; EIF2AK2; CREB1; BAK1; MAP2K2; CCND1; CDK4; CDK6; MAPK13; HCK; LYN; PPP3CB; KRAS	3106; 3107; 578; 595; 6772; 6773; 1385; 3845; 4067; 5532; 5534; 64422; 5603; 5605; 5610; 3055; 1019; 1021	186	186
	0.00212239	0.0258721	Negative regulation of MET activity	Reactome	R-HSA-6807004	EPS15; PTPN1; RPS27A; SH3GL1; PTPRJ	5795; 2060; 6233; 5770; 6455	21	21
	0.00218812	0.026028	Platelet degranulation	Reactome	R-HSA-114608	CD63; MANF; HSPA5; FAM49B; TMSB4X; MAGED2; FAM3C; CALU; ECM1; LGALS3BP; CFL1; F13A1; PLEK; ORM1	10447; 7114; 7873; 3959; 2162; 1072; 3309; 51571; 1893; 5341; 813; 10916; 5004; 967	129	129
	0.00218056	0.026028	Activation of DNA fragmentation factor	Reactome	R-HSA-211227	HIST1H1D; HIST1H1E; KPNA1; HMGB2	3008; 3148; 3007; 3836	13	13
	0.00218056	0.026028	Apoptosis induced DNA fragmentation	Reactome	R-HSA-140342	HIST1H1D; HIST1H1E; KPNA1; HMGB2	3008; 3148; 3007; 3836	13	13
	0.00232227	0.0274028	Brain-Derived Neurotrophic Factor (BDNF) signaling pathway	Wikipathways	WP2380	STAT1; YBX1; KIDINS220; CREB1; MAP2K2; MARCKS; RANBP9; CDK5; CFL1; ADAM17; SPP1; EIF2S1; RHOG; EEF2; EIF2S2	4904; 1385; 10048; 5605; 391; 1938; 1072; 6772; 1020; 6696; 4082; 8894; 1965; 57498; 6868	144	144
	0.00253509	0.0294429	Influenza Life Cycle	Reactome	R-HSA-168255	NUP88; NUP107; CALR; NUP205; KPNA1; POLR2L; NUP210; CANX	23165; 5441; 4927; 3836; 821; 23225; 811; 57122	53	53
	0.00253509	0.0294429	Peptide hormone metabolism	Reactome	R-HSA-2980736	SEC11A; SEC11C; SPCS1; SPCS2; GZMH; ATP6AP2; CTSZ; SLC30A7	23478; 148867; 28972; 90701; 1522; 9789; 10159; 2999	53	53
	0.00257206	0.029639	Shigellosis - Homo sapiens (human)	KEGG	path:hsa05131	ARPC1B; ARPC2; MAPK13; ROCK1; ARPC4; CD44; HCLS1; RHOG; ELMO1	391; 960; 6093; 5603; 10093; 10095; 3059; 9844; 10109	65	65
	0.0026452	0.0302455	The human immune response to tuberculosis	Wikipathways	WP4197	TAP1; IFITM1; IFI35; STAT2; STAT1	6890; 3430; 8519; 6772; 6773	22	22
	0.00273221	0.0310001	Allograft Rejection	Wikipathways	WP2328	HLA-DPB1; STAT1; HLA-C; HLA-B; HLA-DRB1; C1QC; CD40; C1QA; C1QB; HLA-DQB1; HLA-DMB	3123; 714; 713; 712; 6772; 958; 3109; 3106; 3107; 3119; 3115	91	91
	0.00285631	0.0316771	Ubiquitin-dependent degradation of Cyclin D1	Reactome	R-HSA-69229	CCND1; RPS27A; CDK4	1019; 6233; 595	7	7
	0.00285631	0.0316771	Ubiquitin-dependent degradation of Cyclin D	Reactome	R-HSA-75815	CCND1; RPS27A; CDK4	1019; 6233; 595	7	7
	0.00284439	0.0316771	Vpr-mediated nuclear import of PICs	Reactome	R-HSA-180910	NUP88; NUP107; HMGA1; KPNA1; NUP210; NUP205	4927; 23165; 3159; 3836; 23225; 57122	32	32
	0.00294396	0.0324055	classical complement pathway	BioCarta	classicpathway	C1S; C1QC; C1QB; C1QA	716; 714; 712; 713	14	14
	0.0030141	0.0329318	Post-translational protein modification	Reactome	R-HSA-597592	NUP88; RPN1; RPN2; MAVS; RAB4B; HDAC7; ALG3; CD59; HSP90B1; CALU; VDAC3; PDIA6; DDOST; MAGT1; SEC23IP; VDAC2; PMM2; DYNLL1; VDAC1; IDE; DAD1; STT3A; CANX; TMED10; CTSZ; BET1; TMED3; SEC23A; RAB31; COPS7B; RAD21; HIST2H2AB; MAP3K7; TMED9; DERL2; CKAP4; GOSR1; PML; NAE1; BET1L; NUP210; MTA1; COPA; RAB8B; RAB22A; COPZ1; SEL1L; RPS27A; RCN1; NUP107; FOLR2; P4HB; CTSC; PDIA3; MAN2A1; MGAT1; MGAT2; USP…	8237; 5371; 966; 23165; 6885; 80349; 9112; 1650; 8883; 51564; 53916; 84061; 7416; 51272; 1938; 5373; 2589; 5954; 6233; 4927; 5611; 51009; 7419; 10282; 4245; 6696; 2159; 6185; 7184; 1075; 10960; 7345; 11196; 3416; 23423; 23225; 64708; 51399; 9978; 8729; 6184; 10970; 57122; 11031; 9554; 57403; 10484; 821; 4247; 2590; 811; 2350; 3703; 10972; 2923; 10342; 6187; 1603; 2530; 3998; 9527; 372; 1314; 1522…	1383	1378
	0.00321666	0.0348866	Pathogenic Escherichia coli infection - Homo sapiens (human)	KEGG	path:hsa05130	ARPC1B; ARHGEF2; ROCK1; ARPC4; CD14; NCL; ARPC2; HCLS1	10093; 929; 6093; 4691; 9181; 10095; 3059; 10109	55	55
	0.00326916	0.0349421	Human cytomegalovirus infection - Homo sapiens (human)	KEGG	path:hsa05163	TAP1; ARHGEF11; PPP3R1; MAP2K2; CCND1; HLA-B; CALR; PDIA3; ROCK1; CREB1; BAK1; HLA-C; CDK4; GNA13; CDK6; MAPK13; PPP3CB; RHEB; TMEM173; KRAS	3106; 578; 595; 340061; 9826; 3107; 6009; 6890; 3845; 811; 1385; 2923; 1019; 5532; 5534; 10672; 6093; 5603; 5605; 1021	225	225
	0.00325533	0.0349421	Nicotinate Nicotinamide metabolism	INOH	None	NADK; CD38; NNMT; NADSYN1; NAMPT	55191; 65220; 4837; 10135; 952	24	23
	0.00334524	0.0349945	Rev-mediated nuclear export of HIV RNA	Reactome	R-HSA-165054	NUP88; NUP107; NUP210; RANGAP1; RANBP1; NUP205	4927; 5905; 23165; 23225; 57122; 5902	33	33
	0.00334524	0.0349945	N-glycan trimming in the ER and Calnexin/Calreticulin cycle	Reactome	R-HSA-532668	SEL1L; CALR; RPS27A; PDIA3; DERL2; CANX	6400; 2923; 51009; 821; 811; 6233	34	33
	0.00334524	0.0349945	Transport of the SLBP independent Mature mRNA	Reactome	R-HSA-159227	NUP88; NCBP2; NUP107; ALYREF; NUP210; NUP205	22916; 4927; 23165; 10189; 23225; 57122	33	33
	0.00352748	0.0366411	Interferon gamma signaling	Reactome	R-HSA-877300	HLA-DPB1; STAT1; HLA-C; HLA-B; HLA-DRB1; OAS2; HLA-DQB1; FCGR1A; CD44; PML; PTPN1	5371; 5770; 6772; 3107; 3123; 2209; 3106; 3119; 960; 3115; 4939	94	94
	0.00360683	0.0372033	Pathogenic Escherichia coli infection	Wikipathways	WP2272	ARPC2; ARHGEF2; ROCK1; ARPC4; CD14; NCL; ARPC1B; HCLS1	9181; 10109; 4691; 10093; 3059; 6093; 10095; 929	56	56
	0.00382788	0.0392092	Platelet activation, signaling and aggregation	Reactome	R-HSA-76002	APBB1IP; HSPA5; TMSB4X; FAM3C; ECM1; STXBP3; F13A1; PLEK; MANF; LYN; DGKA; DAGLB; CD63; FAM49B; LGALS3BP; CFL1; PTPN1; RHOG; ORM1; MAGED2; CALU; GNA13	4067; 10447; 1606; 6814; 7114; 7873; 3959; 2162; 1072; 5770; 3309; 221955; 51571; 1893; 10672; 5341; 813; 391; 10916; 54518; 5004; 967	260	260
	0.00393242	0.0397282	Transport of Mature Transcript to Cytoplasm	Reactome	R-HSA-72202	NUP88; SRSF5; RNPS1; NCBP2; NUP107; MAGOHB; ALYREF; THOC2; NUP210; NUP205	57187; 10921; 55110; 22916; 4927; 23165; 10189; 23225; 57122; 6430	82	82
	0.00390888	0.0397282	Transport of the SLBP Dependant Mature mRNA	Reactome	R-HSA-159230	NUP88; NCBP2; NUP107; ALYREF; NUP210; NUP205	22916; 4927; 23165; 10189; 23225; 57122	34	34
	0.00396053	0.0397401	ER-Phagosome pathway	Reactome	R-HSA-1236974	TAP1; SEC22B; CD14; SEC61B; CALR	929; 9554; 6890; 811; 10952	24	24
	0.00415355	0.0413952	Hematopoietic cell lineage - Homo sapiens (human)	KEGG	path:hsa04640	CD38; HLA-DPB1; IL5RA; ITGA3; CD44; HLA-DRB1; CD59; CD14; HLA-DQB1; FCGR1A; HLA-DMB	3109; 3115; 3119; 3123; 3675; 2209; 952; 960; 966; 929; 3568	97	96
	0.00453986	0.0426516	Interactions of Vpr with host cellular proteins	Reactome	R-HSA-176033	NUP88; NUP107; HMGA1; KPNA1; NUP210; NUP205	4927; 23165; 3159; 3836; 23225; 57122	35	35
	0.00453986	0.0426516	Lysosome Vesicle Biogenesis	Reactome	R-HSA-432720	VAMP7; DNASE2; CTSZ; CHMP2A; TXNDC5; M6PR	27243; 4074; 1522; 6845; 81567; 1777	35	35
	0.00449618	0.0426516	Viral myocarditis - Homo sapiens (human)	KEGG	path:hsa05416	HLA-DPB1; HLA-C; HLA-B; HLA-DRB1; CD40; CCND1; HLA-DQB1; HLA-DMB	3115; 3106; 3107; 3109; 3119; 3123; 595; 958	59	58
	0.00449618	0.0426516	ABC-family proteins mediated transport	Reactome	R-HSA-382556	SEL1L; ERLEC1; RPS27A; PEX3; DERL2; EIF2S1; EIF2S3; EIF2S2	6400; 1965; 8894; 27248; 1968; 51009; 8504; 6233	59	58
	0.00449618	0.0426516	Iron uptake and transport	Reactome	R-HSA-917937	RPS27A; ATP6AP1; GLRX3; TCIRG1; ATP6V0D1; HMOX2; HFE; STEAP3	9114; 3163; 537; 10539; 55240; 6233; 10312; 3077	58	58
	0.00449618	0.0426516	mRNA 3,-end processing	Reactome	R-HSA-72187	SRSF5; PABPN1; RNPS1; NCBP2; CSTF2T; MAGOHB; ALYREF; THOC2	57187; 10921; 22916; 6430; 23283; 55110; 10189; 8106	58	58
	0.00441637	0.0426516	Recycling of eIF2:GDP	Reactome	R-HSA-72731	EIF2S1; EIF2S3; EIF2S2	1965; 8894; 1968	8	8
	0.00441637	0.0426516	Nef and signal transduction	Reactome	R-HSA-164944	DOCK2; HCK; ELMO1	9844; 3055; 1794	8	8
	0.004416	0.0426516	HIV Life Cycle	Reactome	R-HSA-162587	NUP88; TAF15; NCBP2; NUP107; RANBP1; CHMP4B; RPS27A; RANGAP1; HMGA1; CHMP2A; KPNA1; POLR2L; MVB12A; NUP210; NUP205	23225; 57122; 22916; 27243; 4927; 5905; 23165; 128866; 3836; 5902; 93343; 8148; 3159; 5441; 6233	156	154
	0.00497873	0.0464786	Defective CFTR causes cystic fibrosis	Reactome	R-HSA-5678895	SEL1L; RPS27A; ERLEC1; DERL2	6400; 51009; 6233; 27248	16	16
	0.00568699	0.0517797	TSH	NetPath	Pathway_TSH	CALR; HSPA5; CREB1; GNA13; CANX	821; 10672; 811; 1385; 3309	26	26
	0.00566966	0.0517797	Leishmaniasis - Homo sapiens (human)	KEGG	path:hsa05140	HLA-DPB1; STAT1; HLA-DRB1; MAP3K7; FCGR2A; HLA-DQB1; FCGR1A; MAPK13; HLA-DMB	2209; 2212; 3109; 3115; 3119; 3123; 5603; 6885; 6772	74	73
	0.00564989	0.0517797	Nicotine Pathway (Dopaminergic Neuron), Pharmacodynamics	PharmGKB	PA162355621	STX8; VAMP5; SEC22B; STX2; CDK5; STX17; STX16	2054; 9482; 10791; 9554; 8675; 55014; 1020	48	48
	0.00564989	0.0517797	IL5	NetPath	Pathway_IL5	IL5RA; STAT1; ALOX5; MAP2K2; HCLS1; HCK; LYN	4067; 3568; 6772; 3055; 3059; 5605; 240	48	48
	0.00627987	0.0523322	Cellular senescence - Homo sapiens (human)	KEGG	path:hsa04218	RHEB; PPP3R1; MAP2K2; HLA-C; HLA-B; CCND1; CDK4; CDK6; MAPK13; VDAC3; VDAC2; VDAC1; PPID; PPP3CB; KRAS	3845; 3106; 3107; 595; 7416; 7417; 5481; 6009; 5532; 5534; 7419; 5603; 5605; 1021; 1019	160	160
	0.0062797	0.0523322	Regulation of RUNX1 Expression and Activity	Reactome	R-HSA-8934593	CCND1; PML; CBFB; CDK6	1021; 865; 595; 5371	18	17
	0.0062797	0.0523322	ABC transporter disorders	Reactome	R-HSA-5619084	SEL1L; RPS27A; ERLEC1; DERL2	6400; 51009; 6233; 27248	17	17
	0.0062797	0.0523322	Disorders of transmembrane transporters	Reactome	R-HSA-5619115	SEL1L; RPS27A; ERLEC1; DERL2	6400; 51009; 6233; 27248	17	17
	0.0062797	0.0523322	role of pi3k subunit p85 in regulation of actin organization and cell migration	BioCarta	cdc42racpathway	ARPC2; ACTR3; ARPC1B; ARPC4	10109; 10093; 10096; 10095	17	17
	0.0062797	0.0523322	y branching of actin filaments	BioCarta	actinypathway	ARPC2; ARPC4; ACTR3; ARPC1B	10109; 10095; 10093; 10096	17	17
	0.00624023	0.0523322	Ebola Virus Pathway on Host	Wikipathways	WP4217	EPS15; HLA-DRB1; STAT1; HLA-DPB1; HLA-B; EIF2S1; EIF2AK2; HLA-C; ITGA3; KPNA1; ADAM17; HLA-DQB1; HLA-DMB	3123; 5610; 2060; 3675; 6772; 6868; 3836; 3109; 1965; 3106; 3107; 3119; 3115	130	130
	0.00620192	0.0523322	EPH-Ephrin signaling	Reactome	R-HSA-2682334	ARPC2; ROCK1; ARPC4; GIT1; CFL1; ARPC1B; LYN; ACTR3; YES1	10109; 4067; 6093; 7525; 1072; 28964; 10095; 10093; 10096	74	74
	0.00613466	0.0523322	Signaling by MET	Reactome	R-HSA-6806834	EPS15; ITGA3; RPS27A; RANBP9; PTPN1; SH3GL1; PTPRJ; KRAS	3675; 5795; 10048; 5770; 6233; 2060; 3845; 6455	61	61
	0.00610979	0.0523322	Ribosome biogenesis in eukaryotes - Homo sapiens (human)	KEGG	path:hsa03008	GNL3; NAT10; WDR3; NOP56; RRP7A; NHP2; UTP15; TCOF1; FBL; WDR75; GAR1	2091; 10885; 84128; 54433; 84135; 27341; 26354; 10528; 6949; 55651; 55226	105	101
	0.00602221	0.0523322	Interactions of Rev with host cellular proteins	Reactome	R-HSA-177243	NUP88; NUP107; NUP210; RANGAP1; RANBP1; NUP205	4927; 5905; 23165; 23225; 57122; 5902	37	37
	0.00602221	0.0523322	RHO GTPases Activate WASPs and WAVEs	Reactome	R-HSA-5663213	NCKAP1L; ARPC2; ABI1; ARPC4; ARPC1B; ACTR3	10096; 10109; 10095; 3071; 10093; 10006	37	37
	0.00601072	0.0523322	CXCR4-mediated signaling events	PID	cxcr4_pathway	INPP5D; STAT2; STAT1; HLA-DRB1; PTPRC; GNA13; CFL1; HCK; LYN; YES1	4067; 6773; 1072; 6772; 3055; 7525; 10672; 3123; 5788; 3635	87	87
	0.0060096	0.0523322	PERK regulates gene expression	Reactome	R-HSA-381042	EIF2S1; HSPA5	1965; 3309	3	3
	0.0060096	0.0523322	The AIM2 inflammasome	Reactome	R-HSA-844615	PYCARD; CASP1	29108; 834	3	3
	0.00640227	0.0530525	cycling of ran in nucleocytoplasmic transport	BioCarta	ranpathway	NUP210; RANBP1; RANGAP1	5902; 23225; 5905	9	9
	0.00739203	0.060912	Apoptosis	Reactome	R-HSA-109581	DBNL; DYNLL1; PPP3R1; HMGB2; ROCK1; BAK1; CD14; PLEC; DIABLO; KPNA1; HIST1H1D; HIST1H1E	929; 3007; 578; 8655; 5534; 3836; 56616; 3148; 3008; 6093; 5339; 28988	118	118
	0.00790401	0.0644112	Aminosugars metabolism	EHMN	Aminosugars metabolism	NUP88; COPA; NUP107; ARCN1; SLC1A5; NUP210; NUP205	4927; 23165; 372; 57122; 6510; 23225; 1314	51	51
	0.00788501	0.0644112	Regulation of RUNX2 expression and activity	Reactome	R-HSA-8939902	RBX1; NR3C1; CBFB; RPS27A; STAT1	2908; 6772; 865; 9978; 6233	28	28
	0.00798762	0.0647349	Endocytosis - Homo sapiens (human)	KEGG	path:hsa04144	EPS15; ARPC2; SNX6; RAB31; SNX4; HLA-C; HLA-B; KIF5B; DNM3; ARPC4; RAB22A; CHMP2A; GIT1; SH3GL1; ARPC1B; PML; MVB12A; GBF1; CHMP4B; FOLR2	2060; 8723; 8729; 3106; 3107; 57403; 27243; 10093; 93343; 58533; 5371; 3799; 11031; 28964; 2350; 6455; 128866; 10095; 10109; 26052	244	244
	0.00819088	0.0660194	Semaphorin interactions	Reactome	R-HSA-373755	ARHGEF11; TYROBP; PLXNA1; ROCK1; HSP90AB1; PTPRC; CDK5; CFL1	7305; 9826; 1020; 6093; 1072; 5788; 3326; 5361	64	64
	0.0088652	0.0667152	Oxidative Damage	Wikipathways	WP3941	C1QC; C1QB; C1QA; BAK1; MAPK13; C1S	578; 5603; 714; 716; 713; 712	40	40
	0.0088652	0.0667152	Transport of Mature mRNA Derived from an Intronless Transcript	Reactome	R-HSA-159231	NUP88; NCBP2; NUP107; ALYREF; NUP210; NUP205	22916; 4927; 23165; 10189; 23225; 57122	40	40
	0.00885901	0.0667152	Human Complement System	Wikipathways	WP2806	C4BPA; CALR; CD59; CD40; RPS19; SPP1; C1S; F13A1; F10; VSIG4	811; 2159; 716; 2162; 966; 722; 6696; 11326; 958; 6223	92	92
	0.00885901	0.0667152	Collagen formation	Reactome	R-HSA-1474290	PLOD2; PLOD3; P4HB; P4HA2; P4HA1; PLEC; CTSS; PPIB; PXDN; CRTAP	5479; 8985; 7837; 10491; 5339; 5034; 5033; 8974; 5352; 1520	92	92
	0.00883993	0.0667152	RUNX3 regulates p14-ARF	Reactome	R-HSA-8951936	CCND1; CBFB; KRAS	865; 595; 3845	11	10
	0.00883993	0.0667152	IRE1alpha activates chaperones	Reactome	R-HSA-381070	SEC61B; HSPA5; SEC63	3309; 11231; 10952	10	10
	0.00883993	0.0667152	The NLRP3 inflammasome	Reactome	R-HSA-844456	HSP90AB1; PYCARD; CASP1	3326; 29108; 834	10	10
	0.00883993	0.0667152	Reactions specific to the complex N-glycan synthesis pathway	Reactome	R-HSA-975578	MGAT2; MAN2A1; FUT8	4124; 4247; 2530	10	10
	0.00883993	0.0667152	ifn alpha signaling pathway	BioCarta	ifnapathway	STAT2; STAT1; ST13	6772; 6773; 6767	10	10
	0.00883993	0.0667152	Vif-mediated degradation of APOBEC3G	Reactome	R-HSA-180585	RBX1; APOBEC3F; RPS27A	9978; 6233; 200316	10	10
	0.00878513	0.0667152	Apoptotic execution phase	Reactome	R-HSA-75153	DBNL; HMGB2; ROCK1; PLEC; KPNA1; HIST1H1D; HIST1H1E	3007; 3836; 3008; 6093; 3148; 5339; 28988	52	52
	0.00878513	0.0667152	Autoimmune thyroid disease - Homo sapiens (human)	KEGG	path:hsa05320	HLA-DPB1; HLA-C; HLA-B; HLA-DRB1; CD40; HLA-DQB1; HLA-DMB	3106; 3107; 3109; 3115; 3119; 3123; 958	53	52
	0.00872409	0.0667152	Methionine and cysteine metabolism	EHMN	Methionine and cysteine metabolism	NUP88; COPA; NUP107; DNMT1; ARCN1; SLC1A5; AHCY; NUP210; NUP205	191; 23165; 1314; 372; 6510; 23225; 57122; 1786; 4927	78	78
	0.00897329	0.0671858	Programmed Cell Death	Reactome	R-HSA-5357801	DBNL; DYNLL1; PPP3R1; HMGB2; ROCK1; BAK1; CD14; PLEC; DIABLO; KPNA1; HIST1H1D; HIST1H1E	929; 3007; 56616; 578; 8655; 5534; 3836; 3148; 3008; 6093; 5339; 28988	121	121
	0.009179	0.0683789	Pentose phosphate pathway	EHMN	Pentose phosphate pathway	NUP88; CD38; NUP210; NUP205; NUP107	4927; 23165; 23225; 57122; 952	29	29
	0.00951604	0.069486	HSP90 chaperone cycle for steroid hormone receptors (SHR)	Reactome	R-HSA-3371497	HSP90AB1; FKBP5; NR3C1; DNAJB1	3326; 2289; 2908; 3337	19	19
	0.00951604	0.069486	Interleukin-12 family signaling	Reactome	R-HSA-447115	VAMP7; P4HB; CANX; STAT1	6772; 821; 5034; 6845	19	19
	0.00951604	0.069486	Growth hormone receptor signaling	Reactome	R-HSA-982772	LYN; PTPN1; STAT1; ADAM17	6868; 4067; 5770; 6772	19	19
	0.00946136	0.069486	Complement and coagulation cascades - Homo sapiens (human)	KEGG	path:hsa04610	C4BPA; VSIG4; CD59; C1QC; C1QB; C1QA; C1S; F13A1; F10	966; 11326; 712; 713; 714; 716; 722; 2159; 2162	79	79
	0.00962043	0.0699021	EGFR1	NetPath	Pathway_EGFR1	RPS10; DYNLL1; CD59; MAP2K2; RPS2; ADAM17; S100A10; SCAMP3; EPS15; CDV3; ITGA3; STAT1; MPZL1; AHNAK; LYN; MTA2; GIT1; RPS27; ANXA2; STAT2; FRK; CREB1; PLEC; CFL1; PTPN1; KRAS; OTUD6B; TFG; ABI1; CDK5; RBCK1; ACTR3	5605; 10006; 6281; 6868; 966; 9019; 79026; 9219; 6204; 6232; 6772; 302; 10616; 10342; 55573; 6187; 4067; 51633; 1020; 5770; 1385; 3845; 5339; 8655; 3675; 6773; 10096; 1072; 2060; 28964; 10067; 2444	457	455
	0.00982342	0.0710271	Non-small cell lung cancer	Wikipathways	WP4255	CCND1; BAK1; PDK1; MAP2K2; CDK4; CDK6; STK4; KRAS	578; 5605; 6789; 1019; 595; 5163; 1021; 3845	66	66
	0.00999605	0.0715737	Graft-versus-host disease - Homo sapiens (human)	KEGG	path:hsa05332	HLA-DPB1; HLA-C; HLA-B; HLA-DRB1; HLA-DQB1; HLA-DMB	3106; 3107; 3109; 3115; 3119; 3123	41	41
	0.00999605	0.0715737	Transport of Mature mRNAs Derived from Intronless Transcripts	Reactome	R-HSA-159234	NUP88; NCBP2; NUP107; ALYREF; NUP210; NUP205	22916; 4927; 23165; 10189; 23225; 57122	41	41

## Sheet: stage
Stage I overrepresented pathways	p-value	q-value	pathway	source	external_id	members_input_overlap	members_input_overlap_geneids	size	effective_size
	2.55e-05	0.0187691	Inositol phosphate metabolism - Homo sapiens (human)	KEGG	path:hsa00562	INPP5A; PIKFYVE; PIK3CA; PIP5K1A; PLCD1; PIP5K1B; ITPKB; MTM1; MTMR2	200576; 5290; 3632; 4534; 8898; 8394; 8395; 5333; 3707	74	74
	0.000209421	0.0617506	Inositol phosphate metabolism	INOH	None	INPP5A; PIP5K1B; PIP5K1A; PLCD1; ITPKB; PIK3CA	8394; 3707; 3632; 5333; 5290; 8395	41	41
	0.000252043	0.0617506	Phosphatidylinositol signaling system - Homo sapiens (human)	KEGG	path:hsa04070	INPP5A; MTM1; PIKFYVE; PIP5K1B; PIP5K1A; PLCD1; ITPKB; PIK3CA; MTMR2	3632; 3707; 5290; 8898; 8394; 8395; 5333; 200576; 4534	99	99
	0.000490595	0.0721174	ketogenesis	HumanCyc	PWY66-367	HMGCS1; HMGCS2; BDH2	3157; 3158; 56898	8	8
	0.000490595	0.0721174	Synthesis of Ketone Bodies	Reactome	R-HSA-77111	ACSS3; HMGCS2; BDH2	79611; 3158; 56898	8	8
	0.000691713	0.0831838	superpathway of inositol phosphate compounds	HumanCyc	PWY-6371	INPP5A; PIKFYVE; PIK3CA; PIP5K1A; PIP5K1B; ITPKB; PLCD1	200576; 8394; 3707; 3632; 5333; 5290; 8395	70	70
	0.000864321	0.0831838	Synthesis of PIPs at the plasma membrane	Reactome	R-HSA-1660499	PTPN13; MTM1; PIP5K1A; PIK3CA; PIP5K1B; MTMR2	8394; 4534; 5783; 5290; 8395; 8898	53	53
	0.00101858	0.0831838	Synthesis and degradation of ketone bodies - Homo sapiens (human)	KEGG	path:hsa00072	HMGCS1; HMGCS2; BDH2	56898; 3157; 3158	10	10
	0.00101858	0.0831838	Ketone body metabolism	Reactome	R-HSA-74182	ACSS3; HMGCS2; BDH2	79611; 3158; 56898	10	10
	0.00120805	0.0855893	Choline metabolism in cancer - Homo sapiens (human)	KEGG	path:hsa05231	SLC44A3; PLD2; PIP5K1B; PIP5K1A; SLC22A5; SLC22A2; PIK3CA; TSC1	6582; 7248; 5290; 8394; 8395; 5338; 6584; 126969	99	99
	0.00137863	0.0855893	Synthesis of PIPs at the late endosome membrane	Reactome	R-HSA-1660517	MTM1; MTMR2; PIKFYVE	200576; 4534; 8898	11	11
	0.00151382	0.0855893	Ephrin B reverse signaling	PID	ephrinbrevpathway	EFNB2; PTPN13; EPHB4; PIK3CA	2050; 1948; 5783; 5290	24	24
	0.00151382	0.0855893	Plexin-D1 Signaling	PID	plexind1_pathway	ITGA8; PIP5K1B; IQSEC1; ITGA7	3679; 8516; 8395; 9922	24	24
	0.00203265	0.105059	PI Metabolism	Reactome	R-HSA-1483255	PIKFYVE; PTPN13; MTM1; PIP5K1A; PIK3CA; PIP5K1B; MTMR2	200576; 4534; 8394; 5783; 5290; 8395; 8898	84	84
	0.00214405	0.105059	Neurotrophic factor-mediated Trk receptor signaling	PID	trkrpathway	PIK3CA; DOCK1; MCF2L; GAB1; NGFR; RAPGEF1	2549; 23263; 2889; 4804; 1793; 5290	63	63
	0.00272904	0.125365	3-phosphoinositide biosynthesis	HumanCyc	PWY-6352	PIP5K1B; PIK3CA; PIP5K1A; PIKFYVE	200576; 8394; 5290; 8395	28	28
	0.00308643	0.133443	Arf6 trafficking events	PID	arf6_traffickingpathway	ITGA8; MAPK8IP3; PLD2; ASAP2; ITGA7	8853; 3679; 5338; 8516; 23162	47	47
	0.00353336	0.138095	Regulation of CDC42 activity	PID	cdc42_reg_pathway	DOCK9; DOCK6; MCF2L; BCAR3	8412; 23263; 23348; 57572	30	30
	0.00356981	0.138095	Arf6 downstream pathway	PID	arf6downstreampathway	RAB11FIP3; PIP5K1A; PLD2	5338; 9727; 8394	15	15
	0.00394325	0.139652	EGFR1	NetPath	Pathway_EGFR1	EFNB2; EPHB3; EPHA4; PLD2; EPHB4; ARHGAP42; TRIM24; PIK3CA; DOCK1; EPHA2; AFAP1L2; GAB1; PKP4; CASKIN2; ENSA; MAGI1; USP6NL; KIAA1217; BCAR3	5338; 8412; 2050; 1969; 2549; 143872; 1948; 2049; 57513; 84632; 2029; 9712; 5290; 8502; 9223; 1793; 2043; 56243; 8805	457	455
	0.00399007	0.139652	ErbB4 signaling events	PID	erbb4_pathway	PIK3CA; WWP1; DLG4; WWOX	1742; 51741; 11059; 5290	31	31
	0.00432521	0.144501	Synthesis of PIPs at the early endosome membrane	Reactome	R-HSA-1660516	MTM1; MTMR2; PIKFYVE	200576; 4534; 8898	16	16
	0.0047105	0.147742	Metabolism	Reactome	R-HSA-1430728	AOC2; LYVE1; NDUFB8; NDUFB5; SLC22A5; EPM2A; G6PC3; HSD17B11; NOSTRIN; FBP1; ME3; GNG7; SLC5A8; PTGDS; PLD2; HMBS; B3GNT2; AMN; AASS; PIK3CA; BHMT2; MPC1; ITPKB; SPTLC3; GMPR2; SUOX; COX6C; HMGCS1; HMGCS2; SLC44A3; PIKFYVE; ACSS3; MTM1; SCD5; NUDT12; RBP4; RPL10L; BTD; BDH2; GMPR; INPP5A; GSTT2B; GSTT2; SULT1C4; CA3; PIP5K1B; PIP5K1A; DDHD2; MTMR2; PTPN13; PLCD1; FTCD; ENTPD5; SLC22A2; BCHE; HAO2…	5783; 51660; 3707; 56898; 4714; 10873; 115677; 55304; 81693; 126969; 2766; 4534; 79966; 51292; 3632; 6821; 3158; 7957; 160728; 83594; 200576; 761; 590; 1345; 9942; 10894; 8395; 6582; 10841; 4711; 51179; 140801; 27233; 3145; 6584; 5333; 314; 2788; 5290; 8898; 653689; 92579; 2203; 686; 79611; 51170; 23259; 1757; 5730; 3157; 10157; 8394; 2953; 23743; 5338; 957; 5950; 10678	1972	1960
	0.00493927	0.147742	Integrin	INOH	None	ITGA8; DOCK9; DOCK1; DOCK6; ITGA7; COL4A5; RAPGEF1; COL4A1	3679; 2889; 1793; 1282; 23348; 1287; 8516; 57572	124	124
	0.00517037	0.147742	Metabolism of Angiotensinogen to Angiotensins	Reactome	R-HSA-2022377	CPA3; CMA1; ACE2	1359; 1215; 59272	17	17
	0.00559577	0.147742	Signaling of Hepatocyte Growth Factor Receptor	Wikipathways	WP313	PIK3CA; DOCK1; RAPGEF1; GAB1	5290; 2549; 2889; 1793	34	34
	0.00610806	0.147742	PI-3K cascade:FGFR3	Reactome	R-HSA-5654710	PIK3CA; FGF2; GAB1	2247; 5290; 2549	18	18
	0.00610806	0.147742	Norepinephrine Neurotransmitter Release Cycle	Reactome	R-HSA-181430	STXBP1; UNC13B; SLC22A2	10497; 6812; 6582	18	18
	0.00621414	0.147742	HGF	INOH	None	PIK3CA; DOCK1; RAPGEF1; GAB1	2549; 2889; 1793; 5290	35	35
	0.006374	0.147742	Scavenging by Class B Receptors	Reactome	R-HSA-3000471	CD36; SSC5D	948; 284297	6	6
	0.006374	0.147742	MET activates PI3K/AKT signaling	Reactome	R-HSA-8851907	PIK3CA; GAB1	2549; 5290	6	6
	0.00650294	0.147742	Phospholipid metabolism	Reactome	R-HSA-1483257	SLC44A3; PLD2; PIKFYVE; PTPN13; PIP5K1B; PIP5K1A; DDHD2; BCHE; PIK3CA; MTM1; MTMR2	126969; 5783; 8395; 23259; 590; 200576; 8394; 5338; 4534; 8898; 5290	216	216
	0.00714077	0.147742	Ephrin signaling	Reactome	R-HSA-3928664	EFNB2; EPHB3; EPHB4	2049; 1948; 2050	19	19
	0.00791644	0.147742	ECM-receptor interaction - Homo sapiens (human)	KEGG	path:hsa04512	ITGA8; CD36; ITGA7; COL4A5; COL4A1; LAMB4	1282; 1287; 22798; 8516; 948; 3679	82	82
	0.00827069	0.147742	PI-3K cascade:FGFR4	Reactome	R-HSA-5654720	PIK3CA; FGF2; GAB1	2247; 5290; 2549	20	20
	0.00827069	0.147742	Angiogenesis	Wikipathways	WP1539	PIK3CA; TEK; FGF2	5290; 2247; 7010	20	20
	0.00827069	0.147742	Phosphorylation of the APC/C	Reactome	R-HSA-176412	ANAPC1; CDC16; UBE2E1	64682; 7324; 8881	20	20
	0.00827069	0.147742	Conversion from APC/C:Cdc20 to APC/C:Cdh1 in late anaphase	Reactome	R-HSA-176407	ANAPC1; CDC16; UBE2E1	64682; 7324; 8881	20	20
	0.00833691	0.147742	Signaling by FGFR1 in disease	Reactome	R-HSA-5655302	TRIM24; PIK3CA; FGF2; GAB1	2549; 8805; 2247; 5290	38	38
	0.00854674	0.147742	PI3K-Akt signaling pathway - Homo sapiens (human)	KEGG	path:hsa04151	ITGA8; TEK; COL4A1; PIK3CA; ITGA7; EPHA2; G6PC3; LAMB4; GNG7; COL4A5; NGFR; MAGI1; TSC1; FGF2; PPP2R5C	2247; 22798; 8516; 5527; 92579; 4804; 2788; 7010; 9223; 7248; 5290; 1282; 1287; 1969; 3679	354	353
	0.00879899	0.147742	Metformin Pathway, Pharmacokinetics	PharmGKB	PA165948259	SLC47A1; SLC22A2	55244; 6582	7	7
	0.00913774	0.147742	EPHB forward signaling	PID	ephbfwdpathway	EFNB2; EPHB3; EPHB4; PIK3CA	2050; 1948; 2049; 5290	39	39
	0.00949973	0.147742	PI-3K cascade:FGFR1	Reactome	R-HSA-5654689	PIK3CA; FGF2; GAB1	2247; 5290; 2549	21	21
	0.00949973	0.147742	Inactivation of APC/C via direct inhibition of the APC/C complex	Reactome	R-HSA-141430	ANAPC1; CDC16; UBE2E1	64682; 7324; 8881	21	21
	0.00949973	0.147742	Inhibition of the proteolytic activity of APC/C required for the onset of anaphase by mitotic spindle checkpoint components	Reactome	R-HSA-141405	ANAPC1; UBE2E1; CDC16	64682; 8881; 7324	21	21
Stage II overrepresented pathways	p-value	q-value	pathway	source	external_id	members_input_overlap	members_input_overlap_geneids	size	effective_size
	6.48e-09	7.38e-06	Metabolism	Reactome	R-HSA-1430728	TRMT112; ACADVL; TM7SF2; GSTA5; RAPGEF4; OSBPL1A; SCO2; SCO1; GGPS1; SLC25A17; SPR; NDC1; N6AMT1; GOT2; MTMR6; NNT; ABCD4; FMO2; UGT2B7; IDH2; XYLT2; BCAT2; SLC25A5; SLC25A4; RPL17; OSBPL5; HOGA1; L2HGDH; ORMDL2; UCKL1; DHODH; ORMDL1; SLC2A2; PPIP5K2; PLEKHA6; HYAL1; STARD4; FBP2; GBA; MGST3; ACADL; HSCB; THEM4; GBA3; SURF1; GBA2; PNPLA8; B4GALT4; SLC46A1; ITPK1; PLCB1; PLCB4; DGUOK; NUDT4; DLAT;…	2806; 11069; 1159; 10478; 23659; 2744; 84532; 26229; 4259; 1632; 6256; 4524; 176; 6697; 81889; 37; 2172; 54963; 6945; 292; 6448; 23169; 7365; 140739; 84812; 54; 1160; 10082; 134147; 1723; 6514; 9611; 5631; 10720; 8702; 117145; 2949; 9107; 94101; 2629; 7364; 10449; 114876; 29095; 23262; 57704; 113235; 51074; 57412; 11163; 7108; 349565; 548596; 150274; 22874; 29104; 114879; 8605; 10975; 221357; 232…	1972	1960
	8.35e-05	0.0336692	Citric acid cycle (TCA cycle)	Reactome	R-HSA-71403	NNT; IDH2; FAHD1; IDH3B; MDH2; ACO2	50; 3420; 81889; 23530; 4191; 3418	22	22
	9.74e-05	0.0336692	Pyruvate metabolism and Citric Acid (TCA) cycle	Reactome	R-HSA-71406	ACO2; IDH2; RXRA; FAHD1; DLAT; MDH2; NNT; IDH3B; L2HGDH	50; 6256; 3420; 4191; 23530; 1737; 3418; 79944; 81889	54	54
	0.000126115	0.0336692	ABC transporters - Homo sapiens (human)	KEGG	path:hsa02010	ABCD4; ABCB10; ABCA3; ABCB5; ABCA1; ABCB8; ABCC1; ABCC9	4363; 19; 21; 23456; 340273; 11194; 5826; 10060	44	44
	0.000147931	0.0336692	Porphyrin metabolism	EHMN	Porphyrin metabolism	UGT2B7; SLC36A1; UGT2B10; UGT2B11; SLC1A4; ABCC1; SLC46A1	113235; 7365; 4363; 7364; 10720; 6509; 206358	34	34
	0.000363499	0.0579504	Formation of Fibrin Clot (Clotting Cascade)	Reactome	R-HSA-140877	F5; F13B; GP1BA; GP1BB; PF4V1; GP9; PROC	2165; 5624; 2812; 5197; 2815; 2153; 2811	39	39
	0.00040595	0.0579504	epo signaling pathway	BioCarta	epopathway	STAT5B; STAT5A; JAK2; PLCG1	6776; 6777; 3717; 5335	11	11
	0.000407384	0.0579504	creatine-phosphate biosynthesis	HumanCyc	PWY-6158	CKMT2; CKMT1A; CKMT1B	548596; 1160; 1159	5	5
	0.000523909	0.0631879	Citrate cycle (TCA cycle) - Homo sapiens (human)	KEGG	path:hsa00020	OGDHL; IDH2; DLAT; MDH2; ACO2; IDH3B	50; 1737; 4191; 55753; 3418; 3420	30	30
	0.000555254	0.0631879	Phase II - Conjugation of compounds	Reactome	R-HSA-156580	TRMT112; UGT2B7; MGST3; GSTA5; GSTM5; N6AMT1; SLC35B3; UGT2B10; GGT7; SLC35D1; AS3MT; UGT2B11	7365; 7364; 51000; 57412; 29104; 2686; 10720; 23169; 4259; 221357; 2949; 51504	115	112
	0.00114316	0.118265	The citric acid (TCA) cycle and respiratory electron transport	Reactome	R-HSA-1428517	NNT; L2HGDH; COX5A; COX5B; UQCR11; SCO1; RXRA; FAHD1; IDH3B; MDH2; DLAT; IDH2; SURF1; ACO2; SCO2	4191; 79944; 10975; 1329; 3418; 81889; 9377; 6834; 6256; 3420; 1737; 9997; 50; 6341; 23530	173	173
	0.00135255	0.128267	IL-3 signaling	INOH	None	STAT5B; STAT5A; JAK2	6776; 6777; 3717	7	7
	0.00166695	0.137698	Platelet Aggregation (Plug Formation)	Reactome	R-HSA-76009	ITGB3; ITGA2B; GP1BA; GP1BB; RAPGEF4; GP9	3690; 2811; 2812; 3674; 2815; 11069	37	37
	0.001694	0.137698	Inositol phosphate metabolism	Reactome	R-HSA-1483249	ITPK1; PLCB1; PLCB4; NUDT4; PLCD4; PPIP5K2; PLCG1	5332; 3705; 5335; 23236; 23262; 84812; 11163	50	50
	0.00192186	0.145805	Mitochondrial Fatty Acid Beta-Oxidation	Reactome	R-HSA-77289	HADH; ACADVL; ACAA2; ECI1; THEM4; ACADL	37; 33; 117145; 10449; 1632; 3033	39	38
	0.00221815	0.156552	Synthesis of IP3 and IP4 in the cytosol	Reactome	R-HSA-1855204	ITPK1; PLCB1; PLCG1; PLCB4; PLCD4	5332; 3705; 5335; 23236; 84812	27	27
	0.00247622	0.156552	Mitochondrial LC-Fatty Acid Beta-Oxidation	Wikipathways	WP368	HADH; ECI1; ACADVL; ACADL	1632; 33; 37; 3033	17	17
	0.00247622	0.156552	TCA Cycle (aka Krebs or citric acid cycle)	Wikipathways	WP78	IDH2; IDH3B; MDH2; ACO2	3420; 50; 4191; 3418	17	17
	0.002865	0.157334	phospholipases	HumanCyc	LIPASYN-PWY	PLCB1; PLCB4; PLCD4; PLCG1; PLA2G4C; PNPLA8	5332; 5335; 8605; 84812; 23236; 50640	41	41
	0.00307984	0.157334	Transport of nucleotide sugars	Reactome	R-HSA-727802	SLC35D1; SLC35B3; SLC35B4	23169; 51000; 84912	9	9
	0.00324545	0.157334	Metabolic reprogramming in colon cancer	Wikipathways	WP4290	ACO2; IDH2; RPIA; MDH2; GOT2; GLS	22934; 2806; 3418; 2744; 4191; 50	42	42
	0.0035916	0.157334	Glyoxylate and dicarboxylate metabolism - Homo sapiens (human)	KEGG	path:hsa00630	ACAT1; ACSS1; ACO2; MDH2; HOGA1	38; 112817; 50; 84532; 4191	30	30
	0.0035916	0.157334	TCA cycle	EHMN	TCA cycle	IDH2; ACO2; OGDHL; IDH3B; MDH2	50; 3420; 55753; 3418; 4191	30	30
	0.00360142	0.157334	Vpr-mediated induction of apoptosis by mitochondrial outer membrane permeabilization	Reactome	R-HSA-180897	SLC25A5; SLC25A4	292; 291	3	3
	0.00360142	0.157334	wybutosine biosynthesis	HumanCyc	PWY-7283	LCMT2; TYW1	9836; 55253	3	3
	0.00363432	0.157334	ECM proteoglycans	Reactome	R-HSA-3000178	LAMA1; ITGB3; ITGA2B; LAMA2; ACAN; HAPLN1; NCAM1	3690; 1404; 3674; 176; 284217; 3908; 4684	57	57
	0.00381477	0.157334	fatty acid &beta;-oxidation	HumanCyc	FAO-PWY	ACAA2; ECI1; ACADL; HADH	1632; 33; 10449; 3033	19	19
	0.00401125	0.157334	ABC-family proteins mediated transport	Reactome	R-HSA-382556	PEX3; ABCB10; ABCC9; ABCB5; ABCB8; ABCC1; ABCA3	21; 11194; 340273; 4363; 23456; 10060; 8504	59	58
	0.00411762	0.157334	Fatty acid degradation - Homo sapiens (human)	KEGG	path:hsa00071	HADH; ACADVL; ACAA2; ACAT1; ECI1; ACADL	33; 37; 38; 1632; 10449; 3033	44	44
	0.00428591	0.157334	GP1b-IX-V activation signalling	Reactome	R-HSA-430116	GP1BA; GP9; GP1BB	2811; 2815; 2812	10	10
	0.00428591	0.157334	Growth hormone signaling	INOH	None	STAT5B; STAT5A; JAK2	6776; 6777; 3717	10	10
	0.00461345	0.159943	Glycolysis and Gluconeogenesis	Wikipathways	WP534	SLC2A4; SLC2A2; DLAT; MDH2; FBP2; GOT2	2806; 6514; 6517; 8789; 4191; 1737	45	45
	0.00463807	0.159943	D-<i>myo</i>-inositol-5-phosphate metabolism	HumanCyc	PWY-6367	PLCB1; PLCD4; PLCB4; PLCG1	5332; 84812; 23236; 5335	20	20
	0.00548812	0.163328	EPO signaling pathway	PID	epopathway	STAT5B; PLCG1; VAV2; JAK2; STAT5A	6777; 5335; 6776; 7410; 3717	33	33
	0.00573498	0.163328	Trans-sulfuration pathway	Wikipathways	WP4253	CKMT2; CKMT1A; CKMT1B; GGT7; GOT2; MDH2	1160; 548596; 2806; 1159; 4191; 2686	47	47
	0.0057409	0.163328	mitochondrial fatty acid beta-oxidation of saturated fatty acids	Reactome	R-HSA-77286	HADH; ACADVL; ACADL	33; 3033; 37	11	11
	0.0057409	0.163328	IL-5 signaling	INOH	None	STAT5B; STAT5A; JAK2	6776; 6777; 3717	11	11
	0.0057409	0.163328	Signaling by Leptin	Reactome	R-HSA-2586552	STAT5B; STAT5A; JAK2	6776; 6777; 3717	11	11
	0.0057409	0.163328	Synthesis of pyrophosphates in the cytosol	Reactome	R-HSA-1855167	ITPK1; PPIP5K2; NUDT4	11163; 3705; 23262	11	11
	0.0057409	0.163328	Creatine metabolism	Reactome	R-HSA-71288	CKMT2; CKMT1A; CKMT1B	548596; 1159; 1160	11	11
	0.00614372	0.164419	Biological oxidations	Reactome	R-HSA-211859	TRMT112; FMO2; CMBL; UGT2B7; MGST3; GSTA5; ACSS1; RXRA; GSTM5; N6AMT1; SLC35B3; UGT2B10; GGT7; SLC35D1; AS3MT; UGT2B11	7365; 51000; 51504; 57412; 29104; 2686; 6256; 134147; 10720; 23169; 221357; 4259; 2327; 84532; 7364; 2949	231	226
	0.00625264	0.164419	Fatty Acid Beta Oxidation	Wikipathways	WP143	HADH; ECI1; ACADVL; ACADL; ACAT1	3033; 1632; 38; 33; 37	34	34
	0.00662556	0.164419	Common Pathway of Fibrin Clot Formation	Reactome	R-HSA-140875	F13B; PF4V1; PROC; F5	2165; 5624; 5197; 2153	22	22
	0.00662556	0.164419	Signal transduction by L1	Reactome	R-HSA-445144	ITGA2B; ITGB3; VAV2; NCAM1	3690; 3674; 7410; 4684	22	22
	0.00662556	0.164419	Intrinsic Pathway of Fibrin Clot Formation	Reactome	R-HSA-140837	GP1BA; PROC; GP9; GP1BB	5624; 2812; 2811; 2815	22	22
	0.00703552	0.164419	4-hydroxyproline degradation	HumanCyc	HYDROXYPRODEG-PWY	GOT2; HOGA1	2806; 112817	4	4
	0.00703552	0.164419	Mitochondrial ABC transporters	Reactome	R-HSA-1369007	ABCB10; ABCB8	23456; 11194	4	4
	0.00745716	0.164419	Dimethyl-branched-chain fatty acid mitochondrial beta-oxidation	EHMN	Dimethyl-branched-chain fatty acid mitochondrial beta-oxidation	HADH; ACADL; ACAA2	33; 3033; 10449	12	12
	0.00745716	0.164419	il 3 signaling pathway	BioCarta	il3pathway	STAT5B; STAT5A; JAK2	3717; 6776; 6777	12	12
	0.00745716	0.164419	NAD <i>de novo</i> biosynthesis	HumanCyc	NADSYN-PWY	KMO; NMNAT3; IDO1	8564; 3620; 349565	13	12
	0.00753576	0.164419	Mitochondrial protein import	Reactome	R-HSA-1268020	HSCB; SLC25A4; COX19; PAM16; ACO2; CMC4; TIMM21	50; 291; 90639; 150274; 51025; 29090; 100272147	65	65
	0.00780194	0.164419	Di-unsaturated fatty acid beta-oxidation	EHMN	Di-unsaturated fatty acid beta-oxidation	ACAA2; ECI1; ACADL; HADH	33; 10449; 1632; 3033	23	23
	0.00780194	0.164419	growth hormone signaling pathway	BioCarta	ghpathway	STAT5B; PLCG1; JAK2; STAT5A	6777; 5335; 6776; 3717	23	23
	0.00780194	0.164419	TP53 regulates transcription of additional cell cycle genes whose exact role in the p53 pathway remain uncertain	Reactome	R-HSA-6804115	CNOT3; CNOT2; CNOT1; CNOT6	57472; 4848; 23019; 4849	23	23
	0.0094448	0.185112	Platelet Adhesion to exposed collagen	Reactome	R-HSA-75892	GP1BA; GP9; GP1BB	2811; 2812; 2815	13	13
	0.0094448	0.185112	L-kynurenine degradation	HumanCyc	PWY-6309	KMO; GOT2; IDO1	8564; 3620; 2806	13	13
	0.00952533	0.185112	Metabolism of lipids	Reactome	R-HSA-556833	ACADVL; TM7SF2; GBA; MGLL; FABP6; NFYB; GGPS1; SLC25A17; ACADL; NCOR1; THEM4; ACAA2; PLEKHA6; ACAT1; MTMR6; GBA2; PNPLA8; SGPP1; SLC44A1; HADH; RXRA; OSBPL1A; PLA2G4C; FABP7; OSBPL5; ARSD; PLA2G15; GBA3; ORMDL2; ORMDL1; PRKD1; ECI1; GPX4; ABCC1; STARD4	4801; 10478; 23659; 22874; 114879; 2629; 8605; 50640; 414; 11343; 9611; 1632; 38; 6256; 81537; 117145; 2172; 134429; 9107; 23446; 94101; 10449; 114876; 29095; 57704; 4363; 37; 9453; 3033; 5587; 2879; 2173; 7108; 33; 57733	664	659
Stage III overrepresented pathways	p-value	q-value	pathway	source	external_id	members_input_overlap	members_input_overlap_geneids	size	effective_size
	4.97e-24	6.2e-21	Neutrophil degranulation	Reactome	R-HSA-6798695	ELANE; CAMP; RAB4B; TIMP2; EPX; LCN2; BPI; PLAUR; STK10; QSOX1; ARG1; ANO6; STOM; PGLYRP1; LYZ; CHI3L1; OLFM4; S100A12; DEFA1B; HK3; CLEC12A; DGAT1; PSEN1; CD55; CD177; FGR; ATP6AP2; CEACAM1; DEFA4; S100A9; S100A8; DEFA1; CEACAM6; B4GALT1; CEACAM8; SURF4; PRTN3; ANPEP; RNASE3; ITGB2; SERPINB10; CD47; VNN1; RETN; PLAU; QPCT; CYBB; SIGLEC14; CYBA; TCN1; LTF; LGALS3; GRN; SLC15A4; CR1; RAB24; CDA; I…	8876; 5329; 8694; 4353; 1669; 978; 3689; 634; 2268; 6283; 4069; 23218; 290; 4057; 100049587; 6793; 5199; 2040; 5273; 4318; 1535; 53916; 566; 5768; 5657; 121260; 10159; 6836; 5663; 1667; 728358; 1116; 6037; 6279; 401258; 3934; 6515; 2683; 1604; 3958; 8288; 5328; 6280; 201294; 961; 383; 7077; 23200; 4317; 196527; 57126; 9798; 945; 4680; 2896; 1536; 8993; 3101; 820; 1378; 683; 671; 10562; 160364; 19…	490	485
	8.94e-20	5.57e-17	Innate Immune System	Reactome	R-HSA-168249	ELANE; RAB4B; TIMP2; EPX; STK10; CD33; IST1; CHI3L1; IKBKE; S100A12; LBP; CD177; FGR; ATP6AP2; FGG; FGA; PRTN3; RNASE3; HK3; SIGLEC14; SLC15A4; PLD4; SLC2A3; MASP1; MASP2; AZU1; RAB44; TLR1; BST1; RASGRP2; CRP; CLEC12A; ANO6; QSOX1; SAA1; CPB2; CD209; DGAT1; C4BPA; QPCT; CEACAM1; NF2; CEACAM6; B4GALT1; CEACAM8; SURF4; FCN2; SERPINB10; VNN1; GRN; CR1; MPO; VAV3; TCN1; ANPEP; RETN; STOM; LYZ; OLFM4…	735; 2244; 5329; 8694; 4353; 3929; 1535; 978; 6288; 401258; 10747; 728358; 3689; 634; 10451; 2147; 8876; 6283; 3385; 5663; 9641; 4069; 290; 100049587; 6793; 5199; 1401; 2040; 5273; 1378; 7448; 4318; 53916; 837; 566; 5768; 5657; 10159; 6836; 6654; 57126; 730; 121260; 1667; 1191; 5598; 1361; 1116; 6037; 6279; 4771; 4842; 3934; 6515; 5648; 2683; 1604; 3958; 8288; 5328; 4317; 6280; 1088; 2266; 53917;…	1077	1065
	5.52e-14	2.3e-11	Complement and coagulation cascades - Homo sapiens (human)	KEGG	path:hsa04610	CD55; PLAUR; CPB2; C8G; C4BPA; C9; FGG; C7; FGA; FGB; ITGB2; PLAU; VTN; SERPINF2; CLU; F11; F2; CR1; F7; MASP1; MASP2; PLG	5648; 7448; 1604; 730; 1191; 2243; 2244; 10747; 5328; 1361; 722; 5329; 2266; 5340; 733; 735; 5345; 1378; 2147; 2155; 2160; 3689	79	79
	6.43e-13	2e-10	Immune System	Reactome	R-HSA-168256	UBE2Q1; ELANE; RAB4B; UBE2J1; EPX; STK10; CD33; IST1; AKT2; CHI3L1; IKBKE; S100A12; TIMP2; LBP; RETN; LYZ; ATP6AP2; FGG; IFI27; PRTN3; RNASE3; HK3; OASL; SIGLEC14; SLC15A4; PLD4; CD300LF; SLC2A3; CPB2; MASP2; AZU1; RAB44; TLR1; BST1; RASGRP2; CRP; CLEC12A; ANO6; QSOX1; SAA1; MASP1; CD209; LILRB4; DGAT1; C4BPA; QPCT; CEACAM1; HLA-DQB1; NF2; CEACAM6; B4GALT1; CEACAM8; SURF4; HLA-DOA; FCN2; SERPINB1…	3929; 837; 10747; 3689; 2147; 3385; 79168; 4069; 290; 100049587; 6793; 3597; 2040; 7448; 53916; 6654; 1361; 51465; 6279; 6515; 961; 3119; 7077; 1669; 10159; 9798; 4680; 122618; 8925; 1536; 730; 10235; 683; 160364; 30835; 6288; 2244; 5329; 208; 978; 634; 1436; 733; 5663; 3111; 5273; 4318; 996; 121260; 722; 55585; 1667; 958; 2683; 5328; 6280; 4317; 146722; 1378; 10562; 56729; 10451; 25797; 6947; 19…	1840	1827
	6.15e-11	1.53e-08	Extracellular matrix organization	Reactome	R-HSA-1474244	MFAP4; ITGA9; ELANE; MMP11; TIMP1; MMP19; PCOLCE2; LTBP4; LAMB3; TIMP2; LOXL1; TLL2; MMP12; PSEN1; ITGB2; CEACAM1; ICAM3; CEACAM6; CEACAM8; FGG; FGA; FGB; LAMA3; ITGB7; EFEMP1; COMP; CD47; EFEMP2; LOXL2; VTN; BMP1; FN1; PLG; ITGA11; MMP8; MMP9; MMP7	3695; 4680; 7076; 1991; 2244; 4320; 649; 2202; 7093; 3914; 7448; 4327; 4016; 3680; 2335; 4318; 4317; 22801; 30008; 961; 3909; 8425; 1088; 2266; 4017; 26577; 3689; 2243; 634; 4316; 7077; 5340; 4239; 1311; 4321; 3385; 5663	294	294
	2.45e-10	5.1e-08	Complement and Coagulation Cascades	Wikipathways	WP558	F2; CR1; F7; PLAUR; SERPINF2; MASP1; PLAU; CPB2; PLG; C9; CD55; MASP2; C8G; CLU; C7; FGB	5648; 730; 1191; 2155; 733; 735; 5328; 10747; 1361; 1378; 5329; 5345; 5340; 2147; 2244; 1604	59	59
	3.23e-10	5.76e-08	Dengue-2 Interactions with Complement and Coagulation Cascades	Wikipathways	WP3896	F2; CR1; F7; PLAUR; SERPINF2; MASP1; PLAU; CPB2; PLG; C9; CD55; MASP2; C8G; CLU; C7; FGB	5648; 730; 1191; 2155; 733; 735; 5328; 10747; 1361; 1378; 5329; 5345; 5340; 2147; 2244; 1604	60	60
	1.55e-09	2.41e-07	N-Glycan biosynthesis - Homo sapiens (human)	KEGG	path:hsa00510	ALG13; ST6GAL1; ALG3; MAN2A2; DOLPP1; MGAT1; ALG10B; ALG10; STT3B; STT3A; B4GALT1; DAD1; MAN1A1; FUT8	4245; 4122; 144245; 1603; 4121; 6480; 84920; 10195; 2530; 2683; 57171; 3703; 201595; 79868	49	49
	3.79e-09	5.25e-07	Urokinase-type plasminogen activator (uPA) and uPAR-mediated signaling	PID	upa_upar_pathway	ELANE; ITGB2; FN1; MMP12; PLAUR; CSF1R; PLAU; VTN; PLG; MMP9; FGG; FGA; FGB	5340; 1991; 2266; 4321; 2243; 7448; 2244; 4318; 5329; 1436; 3689; 5328; 2335	44	44
	3.76e-08	4.45e-06	Human Complement System	Wikipathways	WP2806	FCN2; CRP; CR1; CD55; PLAUR; ELANE; MASP2; MASP1; PLG; C9; CFP; C4BPA; CD40; FGG; C7; FGA; FGB	2244; 2243; 1991; 1401; 2266; 5329; 730; 735; 10747; 1378; 5340; 722; 1604; 5648; 958; 5199; 2220	92	92
	3.92e-08	4.45e-06	Dengue-2 Interactions with Blood Clotting Cascade	Wikipathways	WP3897	F2; F11; F7; PLAU; PLG; SERPINF2; FGG; FGA; FGB	2155; 2244; 2266; 2243; 5328; 5345; 5340; 2147; 2160	22	22
	6.24e-08	6.48e-06	Blood Clotting Cascade	Wikipathways	WP272	F2; F11; F7; PLAU; PLG; SERPINF2; FGG; FGA; FGB	2155; 2244; 2266; 2243; 5328; 5345; 5340; 2147; 2160	23	23
	1.35e-07	1.3e-05	Antimicrobial peptides	Reactome	R-HSA-6803157	RNASE3; DEFA3; LCN2; BPI; CAMP; ELANE; LYZ; TLR1; PGLYRP1; DEFA4; S100A9; LTF; DEFA1; CLU; DEFA1B; PRTN3; S100A8	6037; 3934; 4069; 4057; 8993; 1667; 6280; 1191; 1669; 6279; 5657; 820; 671; 1668; 728358; 7096; 1991	106	100
	2.42e-07	1.95e-05	N-Glycan biosynthesis	EHMN	N-Glycan biosynthesis	ST6GAL1; ALG3; MAN2A2; DOLPP1; MGAT1; B4GALT1; STT3B; STT3A; DAD1; MAN1A1; FUT8	4122; 57171; 2530; 4245; 4121; 3703; 201595; 2683; 1603; 10195; 6480	42	42
	2.46e-07	1.95e-05	Vitamin B12 Metabolism	Wikipathways	WP1533	CRP; APOE; SOD2; SOD3; F7; MPO; SAA4; TCN1; F2; SAA1; TCN2; PLG	6948; 1401; 6288; 6649; 2155; 348; 6947; 6648; 4353; 5340; 6291; 2147	51	51
	2.5e-07	1.95e-05	fibrinolysis pathway	BioCarta	fibrinolysispathway	F2; CPB2; PLAU; PLG; FGG; FGA; FGB	2147; 2266; 2243; 2244; 5328; 1361; 5340	14	14
	7.81e-07	5.73e-05	Regulation of TLR by endogenous ligand	Reactome	R-HSA-5686938	LBP; TLR1; S100A9; S100A8; FGG; FGA; FGB	2243; 2266; 7096; 6279; 3929; 2244; 6280	16	16
	8.59e-07	5.95e-05	Regulation of Insulin-like Growth Factor (IGF) transport and uptake by Insulin-like Growth Factor Binding Proteins (IGFBPs)	Reactome	R-HSA-381426	IGFBP2; SERPINA10; PCSK9; TIMP1; FN1; WFS1; IGFBP5; F2; TGOLN2; PLG; APOE; QSOX1; IGFBP4; PRSS23; FGG; STC2; FAM20C; FGA	7076; 10618; 3488; 11098; 255738; 2335; 51156; 348; 5768; 3485; 56975; 2266; 2243; 8614; 3487; 7466; 2147; 5340	127	126
	3.43e-06	0.00020372	cholesterol biosynthesis I	HumanCyc	PWY66-341	MSMO1; LBR; DHCR7; EBP; FDFT1; DHCR24	6307; 2222; 1717; 3930; 10682; 1718	13	13
	3.43e-06	0.00020372	cholesterol biosynthesis II (via 24,25-dihydrolanosterol)	HumanCyc	PWY66-3	MSMO1; LBR; DHCR7; EBP; FDFT1; DHCR24	6307; 2222; 1717; 3930; 10682; 1718	13	13
	3.43e-06	0.00020372	cholesterol biosynthesis III (via desmosterol)	HumanCyc	PWY66-4	MSMO1; LBR; DHCR7; EBP; FDFT1; DHCR24	6307; 2222; 1717; 10682; 3930; 1718	13	13
	5.43e-06	0.000307548	Integrin cell surface interactions	Reactome	R-HSA-216083	ITGA9; ITGB2; FN1; ITGB7; COMP; CD47; VTN; ITGA11; ICAM3; FGG; FGA; FGB	7448; 3695; 961; 22801; 1311; 2266; 2243; 3385; 2244; 3689; 3680; 2335	67	67
	7.02e-06	0.00038064	Degradation of the extracellular matrix	Reactome	R-HSA-1474228	ELANE; LAMA3; MMP11; BMP1; TIMP1; TLL2; MMP19; PLG; MMP8; MMP9; MMP7; LAMB3; PSEN1; MMP12; TIMP2	7076; 4320; 649; 4327; 3914; 4318; 4317; 3909; 1991; 4316; 7077; 5340; 7093; 4321; 5663	105	105
	9.49e-06	0.000478321	Beta2 integrin cell surface interactions	PID	integrin2_pathway	SPON2; ITGB2; PLAUR; PLAU; ICAM3; FGG; FGA; FGB	10417; 2266; 3385; 2244; 5329; 3689; 2243; 5328	30	30
	9.59e-06	0.000478321	Complement Activation	Wikipathways	WP545	CD55; MASP1; MASP2; C9; C8G; C7; CFP	5648; 5199; 730; 733; 735; 10747; 1604	22	22
	1.12e-05	0.000536287	Post-translational protein phosphorylation	Reactome	R-HSA-8957275	FGG; SERPINA10; PCSK9; TIMP1; FN1; IGFBP5; TGOLN2; APOE; QSOX1; IGFBP4; PRSS23; WFS1; STC2; FAM20C; FGA	7076; 10618; 3488; 11098; 255738; 2335; 51156; 348; 5768; 56975; 2266; 2243; 8614; 3487; 7466	110	109
	1.24e-05	0.000571588	Matrix Metalloproteinases	Wikipathways	WP129	TIMP2; TIMP1; MMP19; MMP8; MMP9; MMP7; MMP12; MMP11	4321; 4320; 4327; 7076; 7077; 4316; 4318; 4317	31	31
	2.62e-05	0.00109198	Fibronectin matrix formation	Reactome	R-HSA-1566977	CEACAM1; CEACAM8; FN1; CEACAM6	1088; 634; 4680; 2335	6	6
	2.62e-05	0.00109198	Metal sequestration by antimicrobial proteins	Reactome	R-HSA-6799990	LCN2; S100A9; S100A8; LTF	6279; 4057; 3934; 6280	6	6
	2.7e-05	0.00109198	Beta3 integrin cell surface interactions	PID	integrin3_pathway	FN1; PLAUR; CD47; CSF1R; PLAU; VTN; FGG; FGA; FGB	2266; 961; 7448; 2244; 5329; 1436; 2243; 5328; 2335	44	44
	2.71e-05	0.00109198	Beta1 integrin cell surface interactions	PID	integrin1_pathway	ITGA9; LAMA3; FN1; PLAUR; PLAU; VTN; ITGA11; LAMB3; FGG; FGA; FGB	3914; 7448; 22801; 3909; 5328; 2266; 2244; 3680; 5329; 2243; 2335	66	66
	4.35e-05	0.00169374	lectin induced complement pathway	BioCarta	lectinpathway	C9; C7; MASP1; MASP2; C8G	730; 5648; 735; 10747; 733	12	12
	5.94e-05	0.00224455	Anchoring fibril formation	Reactome	R-HSA-2214320	TLL2; LAMA3; LAMB3; BMP1	7093; 3909; 3914; 649	7	7
	6.85e-05	0.00251178	extrinsic prothrombin activation pathway	BioCarta	extrinsicpathway	F2; FGG; FGA; FGB; F7	2243; 2266; 2147; 2244; 2155	13	13
	7.44e-05	0.00264991	Formation of Fibrin Clot (Clotting Cascade)	Reactome	R-HSA-140877	F2; F11; F7; CD177; FGB; FGG; FGA; PRTN3	2147; 2160; 2155; 2244; 5657; 2266; 2243; 57126	39	39
	8.36e-05	0.00289637	Platelet degranulation	Reactome	R-HSA-114608	PCYOX1L; FN1; TIMP1; MMRN1; QSOX1; ECM1; FGA; LGALS3BP; PLG; LHFPL2; SERPINF2; CLU; FGG; CD9; FGB	7076; 3959; 2244; 928; 5345; 1893; 10184; 2335; 5768; 78991; 2266; 2243; 5340; 22915; 1191	129	129
	0.000107466	0.0035881	Metabolism of vitamins and cofactors	Reactome	R-HSA-196854	PTGS2; APOE; ACACA; NNMT; VNN2; CYP8B1; VNN1; SLC2A3; PTGIS; TCN2; GPC1; SLC23A2; BST1; TCN1; SLC5A6; PRKG2; VKORC1L1; COQ3	1582; 5743; 5593; 348; 8875; 6948; 6515; 9962; 2817; 4837; 683; 8884; 51805; 5740; 8876; 6947; 154807; 31	181	178
	0.000110703	0.0035881	Activation of Matrix Metalloproteinases	Reactome	R-HSA-1592389	ELANE; TIMP2; TIMP1; PLG; MMP9; MMP7; MMP11	5340; 7077; 4316; 7076; 4318; 1991; 4320	31	31
	0.000112218	0.0035881	Common Pathway of Fibrin Clot Formation	Reactome	R-HSA-140875	F2; CD177; PRTN3; FGG; FGA; FGB	2147; 5657; 2266; 2244; 2243; 57126	22	22
	0.00011532	0.0035951	Terminal pathway of complement	Reactome	R-HSA-166665	CLU; C9; C7; C8G	730; 1191; 735; 733	8	8
	0.000129064	0.00392543	Response to elevated platelet cytosolic Ca2+	Reactome	R-HSA-76005	PCYOX1L; FN1; TIMP1; MMRN1; QSOX1; ECM1; FGA; LGALS3BP; PLG; LHFPL2; SERPINF2; CLU; FGG; CD9; FGB	7076; 3959; 2244; 928; 5345; 1893; 10184; 5768; 78991; 2266; 2243; 5340; 22915; 2335; 1191	134	134
	0.000137228	0.00407435	Syndecan-4-mediated signaling events	PID	syndecan_4_pathway	F2; LAMA3; FN1; PLG; MMP9; CXCL12; FGFR1	2260; 2147; 5340; 6387; 3909; 4318; 2335	32	32
	0.000150255	0.00435739	GRB2:SOS provides linkage to MAPK signaling for Integrins	Reactome	R-HSA-354194	SOS1; FGG; FN1; FGA; FGB	2243; 2266; 2244; 6654; 2335	15	15
	0.000190069	0.00520437	IL1 and megakaryocytes in obesity	Wikipathways	WP2865	F2; TIMP2; TIMP1; TLR1; S100A9; MMP9	7077; 7096; 7076; 6280; 4318; 2147	24	24
	0.000194832	0.00520437	FGF signaling pathway	PID	fgf_pathway	SOS1; PLAUR; PSEN1; CBL; PLAU; MMP9; FGFR2; FGFR3; FGFR1	2260; 867; 2263; 4318; 5329; 2261; 6654; 5328; 5663	56	56
	0.000196155	0.00520437	Cholesterol biosynthesis via desmosterol	Reactome	R-HSA-6807047	DHCR7; EBP; DHCR24	1718; 1717; 10682	4	4
	0.000196155	0.00520437	Cholesterol biosynthesis via lathosterol	Reactome	R-HSA-6807062	DHCR7; EBP; DHCR24	1718; 1717; 10682	4	4
	0.000210757	0.00547528	Complement cascade	Reactome	R-HSA-166658	FCN2; CRP; CR1; ELANE; CD55; C4BPA; MASP1; MASP2; VTN; C9; CPB2; C8G; F2; CLU; C7	722; 735; 2220; 1401; 5648; 7448; 1604; 1378; 730; 2147; 733; 10747; 1191; 1361; 1991	141	140
	0.000228595	0.0057769	Metabolism of water-soluble vitamins and cofactors	Reactome	R-HSA-196849	PTGS2; ACACA; NNMT; VNN2; CYP8B1; VNN1; SLC2A3; PTGIS; TCN2; SLC23A2; BST1; TCN1; SLC5A6	1582; 5743; 6948; 6515; 9962; 4837; 8875; 8884; 5740; 683; 6947; 31; 8876	114	111
	0.000231632	0.0057769	Selenium Micronutrient Network	Wikipathways	WP15	PTGS2; CRP; SOD2; SOD3; F7; MPO; SAA4; F2; SAA1; PLG; ALOX5AP	6288; 6649; 6648; 2155; 1401; 241; 4353; 5340; 6291; 2147; 5743	83	83
	0.000242341	0.00581153	superpathway of cholesterol biosynthesis	HumanCyc	PWY66-5	MSMO1; LBR; DHCR7; EBP; FDFT1; DHCR24	2222; 1718; 10682; 6307; 1717; 3930	25	25
	0.000242341	0.00581153	Cholesterol biosynthesis	Reactome	R-HSA-191273	MSMO1; LBR; DHCR7; EBP; FDFT1; DHCR24	2222; 1718; 10682; 6307; 1717; 3930	25	25
	0.000268844	0.00632545	Platelet activation, signaling and aggregation	Reactome	R-HSA-76002	RASGRP2; TIMP1; QSOX1; ECM1; ARRB1; CD9; LHFPL2; MMRN1; PIK3CG; FGG; FGA; FGB; PCYOX1L; LGALS3BP; SERPINF2; CLU; PLA2G4A; F2; SOS1; FN1; VAV3; PLG	7076; 3959; 2244; 22915; 1893; 10184; 2335; 5768; 5321; 78991; 2266; 10235; 5294; 2243; 6654; 2147; 5340; 10451; 5345; 408; 1191; 928	260	260
	0.000326039	0.00726018	Alpha-defensins	Reactome	R-HSA-1462054	DEFA4; DEFA3; DEFA1B; DEFA1	1667; 728358; 1668; 1669	10	10
	0.000326039	0.00726018	alternative complement pathway	BioCarta	alternativepathway	C9; C7; CFP; C8G	5199; 730; 735; 733	10	10
	0.000326039	0.00726018	Crosslinking of collagen fibrils	Reactome	R-HSA-2243919	LOXL1; TLL2; LOXL2; BMP1	7093; 4016; 4017; 649	10	10
	0.000340625	0.00745191	Assembly of collagen fibrils and other multimeric structures	Reactome	R-HSA-2022090	LOXL1; LOXL2; LAMA3; BMP1; TLL2; MMP9; MMP7; LAMB3	3914; 4316; 3909; 4017; 7093; 4318; 4016; 649	48	48
	0.000357661	0.00768971	Platelet Aggregation (Plug Formation)	Reactome	R-HSA-76009	RASGRP2; F2; FN1; SOS1; FGG; FGA; FGB	2147; 2266; 10235; 2244; 2243; 6654; 2335	37	37
	0.000380368	0.00786332	Integrin alphaIIb beta3 signaling	Reactome	R-HSA-354192	RASGRP2; SOS1; FN1; FGG; FGA; FGB	2266; 10235; 2244; 2243; 6654; 2335	27	27
	0.000380368	0.00786332	Integrin signaling	Reactome	R-HSA-9006921	RASGRP2; SOS1; FN1; FGG; FGA; FGB	2266; 10235; 2244; 2243; 6654; 2335	27	27
	0.000388711	0.00786332	Asparagine N-linked glycosylation	Reactome	R-HSA-446203	ST6GAL1; ALG3; DOLPP1; ALG10B; MPDU1; DAD1; CD55; DERL1; B4GALT1; RNF139; SLC35C1; ST3GAL1; COG1; MAN2A2; MGAT1; ALG10; STT3A; ALG13; MAN1A1; SEC22A; TRAPPC6B; RFT1; FUT8	144245; 79868; 122553; 9382; 6480; 10195; 84920; 2530; 3703; 2683; 1604; 9526; 11236; 91869; 26984; 4122; 57171; 4245; 55343; 6482; 4121; 79139; 1603	286	285
	0.000390959	0.00786332	Beta5 beta6 beta7 and beta8 integrin cell surface interactions	PID	integrin5_pathway	PLAU; PLAUR; FN1; ITGB7; VTN	3695; 7448; 2335; 5329; 5328	18	18
	0.00045464	0.00899898	Glycosaminoglycan metabolism	Reactome	R-HSA-1630316	HS3ST6; ST3GAL1; CHST12; CHST15; EXT2; NDST1; CHPF2; HS3ST3A1; GPC1; SLC35B2; HS3ST3B1; B4GALT1; B4GALT7	6482; 3340; 347734; 51363; 2683; 55501; 2817; 64711; 54480; 2132; 9955; 11285; 9953	119	119
	0.000476879	0.00929168	Ficolins bind to repetitive carbohydrate structures on the target cell surface	Reactome	R-HSA-2855086	FCN2; MASP1; MASP2	2220; 5648; 10747	5	5
	0.000514566	0.00987175	Steroid biosynthesis - Homo sapiens (human)	KEGG	path:hsa00100	MSMO1; EBP; DHCR7; FDFT1; DHCR24	6307; 1718; 2222; 1717; 10682	19	19
	0.000523317	0.00988752	Hemostasis	Reactome	R-HSA-109582	RASGRP2; TIMP1; NOS1; PLAUR; QSOX1; ECM1; ARRB1; P2RX4; LHFPL2; MMRN1; CD177; FGR; PIK3CG; CEACAM1; CEACAM5; PRKG2; CEACAM8; FGG; FGA; PRTN3; PCYOX1L; ITGB2; SLC7A5; CD47; CEACAM6; PLAU; LGALS3BP; GPC1; CD9; SERPINF2; CLU; PLA2G4A; F11; PDE10A; F2; FN1; SOS1; F7; VAV3; PLG; FGB; IGLL1	5025; 3689; 3959; 408; 2244; 5329; 1893; 10184; 2335; 634; 10451; 2147; 2268; 7076; 2160; 5593; 2817; 5768; 5657; 10846; 6654; 57126; 5294; 78991; 1191; 3543; 22915; 2155; 928; 4842; 5328; 961; 1088; 2266; 5340; 5345; 1048; 4680; 8140; 10235; 2243; 5321	668	667
	0.000573242	0.0106195	heparan sulfate biosynthesis	HumanCyc	PWY-6564	HS3ST6; EXT2; NDST1; HS3ST3A1; HS3ST3B1; B4GALT7	2132; 9955; 11285; 3340; 9953; 64711	29	29
	0.000579093	0.0106195	Biosynthesis of the N-glycan precursor (dolichol lipid-linked oligosaccharide, LLO) and transfer to a nascent protein	Reactome	R-HSA-446193	ST3GAL1; ST6GAL1; ALG3; DOLPP1; ALG10B; MPDU1; ALG10; RFT1; ALG13; SLC35C1	10195; 144245; 9526; 79868; 6482; 55343; 57171; 84920; 6480; 91869	78	78
	0.000686388	0.0124047	Folate Metabolism	Wikipathways	WP176	CRP; SOD2; SOD3; F7; MPO; SAA4; F2; SAA1; PLG	6288; 6649; 2155; 1401; 6648; 4353; 5340; 6291; 2147	66	66
	0.000724375	0.0129042	Nicotinamide salvaging	Reactome	R-HSA-197264	CYP8B1; NNMT; PTGIS; PTGS2	1582; 5743; 5740; 4837	12	12
	0.000834521	0.0144534	HS-GAG biosynthesis	Reactome	R-HSA-2022928	HS3ST6; EXT2; NDST1; HS3ST3A1; GPC1; HS3ST3B1	2132; 9955; 3340; 9953; 2817; 64711	31	31
	0.000834521	0.0144534	Mucin type O-glycan biosynthesis - Homo sapiens (human)	KEGG	path:hsa00512	GALNT16; ST3GAL1; GALNT11; C1GALT1C1; GALNT1; GALNT2	29071; 2589; 63917; 2590; 6482; 57452	31	31
	0.00098287	0.0162411	Post-translational protein modification	Reactome	R-HSA-597592	SEC22A; SERPINA10; PCSK9; RAB4B; HDAC4; TIMP1; ST6GAL1; PLAUR; USP3; SMAD2; DOLPP1; DCAF11; ALG10B; MPDU1; ARRB1; USP25; PEX12; DAD1; APOE; USP34; CD55; RAB44; GALNT1; TGOLN2; DERL1; CEACAM5; POFUT2; ALG3; B4GALT1; RNF139; FGG; NUP54; COG1; SLC35C1; SPON2; ST3GAL1; QSOX1; VNN2; THSD4; VNN1; PIGM; MAN2A2; MGAT1; IGFBP4; IGFBP5; ALG10; STT3A; ALG13; UCHL1; MAN1A1; GALNT2; DPH5; GALNT16; PTRH2; F2; …	79868; 122553; 29761; 55343; 8614; 51156; 2147; 4087; 79139; 22944; 53916; 2589; 79875; 4121; 3488; 63917; 10417; 8875; 408; 5329; 93183; 4245; 7466; 7076; 7345; 683; 6480; 2683; 56975; 1048; 8858; 348; 6045; 9960; 8876; 2335; 26984; 9736; 5199; 2590; 11236; 4122; 5768; 3703; 1603; 29071; 10618; 2530; 51611; 2266; 6482; 80344; 3487; 23275; 9382; 10195; 255738; 9759; 9526; 11098; 53371; 91869; 144…	1383	1378
	0.00101588	0.0162411	Platinum Pathway, Pharmacokinetics/Pharmacodynamics	PharmGKB	PA150642262	MPO; MT2A; ABCC2; SLC31A1	4353; 1317; 1244; 4502	13	13
	0.00101588	0.0162411	Dissolution of Fibrin Clot	Reactome	R-HSA-75205	PLG; PLAUR; PLAU; SERPINF2	5345; 5328; 5329; 5340	13	13
	0.00101588	0.0162411	Advanced glycosylation endproduct receptor signaling	Reactome	R-HSA-879415	LGALS3; S100A12; SAA1; S100B	6285; 6288; 6283; 3958	13	13
	0.00101588	0.0162411	Irinotecan Pathway	Wikipathways	WP229	ABCC2; NPC1; UGT1A9; UGT1A10	54600; 54575; 1244; 4864	13	13
	0.00101588	0.0162411	Mycophenolic acid Pathway, Pharmacokinetics/Pharmacodynamics	PharmGKB	PA165964832	ABCC2; UGT1A8; UGT1A9; UGT1A10	54600; 54575; 54576; 1244	13	13
	0.00106312	0.0167811	heparan sulfate biosynthesis (late stages)	HumanCyc	PWY-6558	HS3ST6; NDST1; HS3ST3A1; EXT2; HS3ST3B1	2132; 9955; 3340; 9953; 64711	22	22
	0.00129796	0.0202319	Linoleate metabolism	EHMN	Linoleate metabolism	PTGS2; CYP1B1; UGT1A10; CYP4F12; SLC23A2; UGT1A9; CYP2S1; PLA2G4A; FADS2	5743; 66002; 5321; 54600; 9962; 54575; 9415; 29785; 1545	74	72
	0.00131756	0.020284	intrinsic prothrombin activation pathway	BioCarta	intrinsicpathway	FGG; F2; F11; FGA; FGB	2147; 2160; 2266; 2244; 2243	23	23
	0.00136773	0.020747	Sterols are 12-hydroxylated by CYP8B1	Reactome	R-HSA-211994	CYP8B1; PTGIS	5740; 1582	2	2
	0.00138091	0.020747	Irinotecan Pathway, Pharmacodynamics	PharmGKB	PA2029	ABCC2; UGT1A8; UGT1A9; UGT1A10	54600; 54575; 54576; 1244	14	14
	0.00161427	0.0235386	Nicotinate metabolism	Reactome	R-HSA-196807	CYP8B1; NNMT; BST1; PTGIS; PTGS2	1582; 5740; 5743; 4837; 683	25	24
	0.00161427	0.0235386	Glycosaminoglycan biosynthesis - heparan sulfate / heparin - Homo sapiens (human)	KEGG	path:hsa00534	NDST1; HS3ST3A1; EXT2; B4GALT7; HS3ST3B1	3340; 11285; 2132; 9953; 9955	24	24
	0.00162335	0.0235386	Collagen degradation	Reactome	R-HSA-1442490	ELANE; MMP11; MMP12; MMP8; MMP9; MMP7	4316; 4321; 4318; 4320; 1991; 4317	35	35
	0.00173426	0.0248578	Toll-Like Receptors Cascades	Reactome	R-HSA-168898	S100A12; LBP; ITGB2; BPI; SAA1; TLR1; S100A9; S100A8; IKBKE; MAPK7; FGG; FGA; FGB; S100B	6285; 6279; 6288; 2244; 3929; 6280; 9641; 2266; 3689; 2243; 671; 6283; 5598; 7096	154	154
	0.00182843	0.0259096	p130Cas linkage to MAPK signaling for integrins	Reactome	R-HSA-372708	FGG; FN1; FGA; FGB	2243; 2266; 2244; 2335	15	15
	0.00229359	0.032136	Cholesterol metabolism - Homo sapiens (human)	KEGG	path:hsa04979	PCSK9; APOE; NPC1; ANGPTL4; ANGPTL3; PLTP; TSPO	4864; 51129; 27329; 706; 348; 5360; 255738	50	50
	0.00235058	0.0324392	Syndecan-3-mediated signaling events	PID	syndecan_3_pathway	PSENEN; PSEN1; FGFR2; FGFR3; FGFR1	2260; 2263; 55851; 2261; 5663	26	26
	0.00236726	0.0324392	Codeine and Morphine Metabolism	Wikipathways	WP1604	ABCC2; UGT1A8; UGT1A9; UGT1A10	54600; 54575; 54576; 1244	16	16
	0.00245662	0.0325894	Lectin pathway of complement activation	Reactome	R-HSA-166662	FCN2; MASP1; MASP2	2220; 10747; 5648	8	8
	0.00245662	0.0325894	Leukotriene modifiers pathway, Pharmacodynamics	PharmGKB	PA165947317	LTB4R; PLA2G4A; ALOX5AP	5321; 241; 1241	8	8
	0.00245662	0.0325894	inhibition of matrix metalloproteinases	BioCarta	reckpathway	TIMP2; TIMP1; MMP9	7076; 4318; 7077	8	8
	0.0024908	0.032695	Metabolism of proteins	Reactome	R-HSA-392499	PCSK9; RAB4B; TIMP1; SERPINA10; DOLPP1; SLC30A5; USP25; TOMM5; ATP6AP2; INHBB; INHBC; INHBE; FGG; FGA; COG1; GNPAT; USP34; MAN1A1; MLYCD; PTRH2; FN1; GALNT11; CPB2; RAB44; BST1; MRPL46; PRSS23; STC2; WFS1; RNF2; RPS27L; MRPL22; ALG3; QSOX1; GFER; APOE; DERL1; CEACAM5; B4GALT1; RNF139; KIN; VNN2; THSD4; VNN1; MAN2A2; IGFBP2; IGFBP4; IGFBP5; STT3A; GALNT1; GALNT2; F7; PROZ; ANPEP; FARS2; HDAC3; HDA…	79868; 122553; 29761; 55343; 8614; 4087; 79139; 64924; 290; 22944; 53916; 23417; 10159; 29093; 1361; 2671; 2589; 83729; 4121; 3488; 63917; 8875; 408; 5329; 3625; 93183; 4245; 7466; 10884; 8443; 7076; 8841; 7345; 10417; 6480; 51065; 2683; 51156; 3485; 56975; 6159; 1048; 8858; 348; 255738; 6045; 9960; 401505; 8876; 2335; 26984; 9736; 2147; 10667; 5199; 2590; 11236; 4122; 5768; 3703; 1603; 29071; 10…	2008	1999
	0.0028758	0.0373555	p75 NTR receptor-mediated signalling	Reactome	R-HSA-193704	PRKCI; SQSTM1; HDAC3; FGD3; SOS1; VAV3; ARHGEF5; ARHGEF1; PSENEN; PSEN1	9138; 8841; 7984; 89846; 6654; 8878; 10451; 55851; 5584; 5663	99	96
	0.00300606	0.0382505	Canonical and Non-Canonical TGF-B signaling	Wikipathways	WP3874	LOXL1; LOXL2; BMP1; SMAD2	4087; 4017; 4016; 649	17	17
	0.00300606	0.0382505	Mycophenolic acid Pathway, Pharmacokinetics	PharmGKB	PA165964832	ABCC2; UGT1A8; UGT1A9; UGT1A10	54600; 54575; 54576; 1244	17	17
	0.00321849	0.0402714	Peptide hormone metabolism	Reactome	R-HSA-2980736	CPB2; ATP6AP2; INHBB; INHBC; ANPEP; SLC30A5; INHBE	1361; 83729; 3625; 64924; 290; 10159; 3626	53	53
	0.00322946	0.0402714	ECM-receptor interaction - Homo sapiens (human)	KEGG	path:hsa04512	ITGA9; LAMA3; ITGB7; FN1; COMP; CD47; VTN; ITGA11; LAMB3	7448; 1311; 2335; 3680; 961; 3909; 3914; 22801; 3695	82	82
	0.00358262	0.044233	Heparan sulfate/heparin (HS-GAG) metabolism	Reactome	R-HSA-1638091	HS3ST6; EXT2; NDST1; HS3ST3A1; GPC1; HS3ST3B1; B4GALT7	2132; 9955; 11285; 3340; 9953; 2817; 64711	54	54
	0.00373002	0.0456013	Syndecan-2-mediated signaling events	PID	syndecan_2_pathway	LAMA3; FN1; NF1; FGFR2; FGFR3; FGFR1	2260; 2263; 3909; 2261; 4763; 2335	41	41
	0.00378916	0.0458746	O-linked glycosylation	Reactome	R-HSA-5173105	GALNT16; SPON2; ST3GAL1; GALNT11; THSD4; ST6GAL1; C1GALT1C1; CFP; POFUT2; GALNT1; GALNT2	23275; 6480; 5199; 2590; 63917; 2589; 79875; 10417; 57452; 29071; 6482	116	116
	0.00383659	0.0460022	Plasma lipoprotein assembly, remodeling, and clearance	Reactome	R-HSA-174824	PCSK9; PLTP; APOE; BMP1; NPC1; ANGPTL4; ANGPTL3; LSR	4864; 5360; 348; 51599; 27329; 51129; 255738; 649	69	69
	0.00397728	0.0472349	Staphylococcus aureus infection - Homo sapiens (human)	KEGG	path:hsa05150	ITGB2; MASP1; MASP2; PLG; HLA-DQB1; HLA-DOA; FGG	5648; 3119; 2266; 5340; 3689; 3111; 10747	56	55
	0.00411717	0.048435	C-MYB transcription factor network	PID	cmyb_pathway	PTGS2; ELANE; SLC25A3; MPO; CSF1R; LYZ; ANPEP; ADA; PRTN3	5657; 5743; 1436; 4069; 290; 4353; 1991; 100; 5250	85	85
	0.00450963	0.0520695	Asthma - Homo sapiens (human)	KEGG	path:hsa05310	RNASE3; HLA-DQB1; HLA-DOA; EPX; CD40	6037; 3111; 3119; 958; 8288	31	30
	0.00450963	0.0520695	mucin core 1 and core 2 <i>O</i>-glycosylation	HumanCyc	PWY-7433	GALNT16; ST3GAL1; GALNT1; GALNT2; GALNT11	57452; 2590; 63917; 6482; 2589	30	30
	0.00461687	0.0528187	Overview of nanoparticle effects	Wikipathways	WP3287	PTGS2; CRP; LAMA3; FN1	2335; 3909; 5743; 1401	19	19
	0.00498052	0.0554528	Urea cycle	Reactome	R-HSA-70635	ARG1; ARG2; SLC25A15	384; 10166; 383	10	10
	0.00498052	0.0554528	Gamma-carboxylation of protein precursors	Reactome	R-HSA-159740	F2; PROZ; F7	2147; 8858; 2155	10	10
	0.00498052	0.0554528	Removal of aminoterminal propeptides from gamma-carboxylated proteins	Reactome	R-HSA-159782	F2; PROZ; F7	2147; 8858; 2155	10	10
	0.00506455	0.0558893	Diseases of signal transduction	Reactome	R-HSA-5663202	HDAC3; SOS1; FN1; PSEN1; SMAD2; CSF1R; CBL; FGFR3; AKT2; HDAC4; IRS2; ARRB1; PSENEN; FGG; FGFR2; FGA; FGB; FGFR1	2244; 8841; 2260; 867; 208; 2335; 2263; 2266; 2243; 6654; 8660; 4087; 5663; 408; 1436; 55851; 2261; 9759	248	248
	0.00521638	0.0565637	Molecules associated with elastic fibres	Reactome	R-HSA-2129379	EFEMP1; MFAP4; EFEMP2; LTBP4; VTN	2202; 4239; 7448; 8425; 30008	31	31
	0.00521638	0.0565637	amb2 Integrin signaling	PID	amb2_neutrophils_pathway	PLG; MYH2; ITGB2; PLAU; MMP9	5340; 4620; 4318; 3689; 5328	31	31
	0.00560474	0.0602509	Glycosaminoglycan biosynthesis - chondroitin sulfate / dermatan sulfate - Homo sapiens (human)	KEGG	path:hsa00532	CHPF2; CHST12; CHST15; B4GALT7	51363; 55501; 54480; 11285	20	20
	0.00596789	0.0636065	IRS-mediated signalling	Reactome	R-HSA-112399	SOS1; IRS2; AKT2; FGFR2; FGFR3; FGFR1	2260; 8660; 2263; 2261; 6654; 208	45	45
	0.00666169	0.0696767	HDAC6 interactions	Wikipathways	WP3987	CYBB; HDAC3; APOE	1536; 8841; 348	11	11
	0.00666169	0.0696767	Gamma-carboxylation, transport, and amino-terminal cleavage of proteins	Reactome	R-HSA-159854	F2; PROZ; F7	2147; 8858; 2155	11	11
	0.0067242	0.0696767	chondroitin sulfate biosynthesis	HumanCyc	PWY-6569	CHPF2; CHST12; CHST15; B4GALT7	11285; 51363; 55501; 54480	21	21
	0.00685855	0.0696767	Regulation of Ras family activation	PID	ras_pathway	RASGRP2; LGALS3; SOS1; RASGRF1; NF1	5923; 10235; 3958; 4763; 6654	34	33
	0.00685855	0.0696767	Oxidative Stress	Wikipathways	WP408	CYBB; MT1X; NOX3; SOD2; SOD3	6648; 6649; 4501; 1536; 50508	33	33
	0.00691628	0.0696767	Cell death signalling via NRAGE, NRIF and NADE	Reactome	R-HSA-204998	SQSTM1; SOS1; FGD3; VAV3; ARHGEF5; ARHGEF1; PSENEN; PSEN1	8878; 9138; 10451; 89846; 7984; 55851; 6654; 5663	78	76
	0.00692856	0.0696767	Collagen formation	Reactome	R-HSA-1474290	LOXL1; LOXL2; LAMA3; BMP1; TLL2; PCOLCE2; MMP9; MMP7; LAMB3	4017; 649; 3914; 4318; 4016; 3909; 26577; 4316; 7093	92	92
	0.00707567	0.0705869	Arachidonic acid metabolism	Reactome	R-HSA-2142753	PTGS2; CYP1B1; CYP8B1; PTGIS; ALOX5AP; PLA2G4A; CYP2U1	1582; 5740; 241; 5743; 5321; 113612; 1545	62	61
	0.00780179	0.076671	Signaling by high-kinase activity BRAF mutants	Reactome	R-HSA-6802948	FGG; FN1; FGA; FGB; ARRB1	2266; 408; 2244; 2243; 2335	34	34
	0.00780851	0.076671	Pilocytic astrocytoma	Wikipathways	WP2253	SOS1; NF1	4763; 6654	4	4
	0.00798222	0.0777643	Other types of O-glycan biosynthesis - Homo sapiens (human)	KEGG	path:hsa00514	B4GALT1; POFUT2; GXYLT1; ST6GAL1	283464; 6480; 23275; 2683	22	22
	0.00837151	0.0803021	Regulation of Complement cascade	Reactome	R-HSA-977606	F2; CR1; CD55; C4BPA; CPB2; VTN; C9; ELANE; C8G; CLU; C7	722; 735; 7448; 1191; 1604; 1378; 730; 2147; 733; 1361; 1991	130	129
	0.00837151	0.0803021	Keratinization	Reactome	R-HSA-6805567	KRT74; KRT71; KRT72; KRT26; KRT17; KRT16; KRT15; KRT14; KRT6C; KRT5; KRT6A	3866; 3852; 3868; 121391; 3861; 140807; 3872; 112802; 3853; 353288; 286887	129	129
	0.00850706	0.080411	Amoebiasis - Homo sapiens (human)	KEGG	path:hsa05146	ITGB2; FN1; SERPINB10; ARG2; ARG1; C9; LAMA3; C8G; LAMB3	3689; 5273; 733; 735; 2335; 3909; 3914; 383; 384	96	95
	0.00864079	0.080411	Eicosanoids	Reactome	R-HSA-211979	CYP4F12; CYP8B1; PTGIS	1582; 66002; 5740	12	12
	0.00864079	0.080411	Glycoprotein hormones	Reactome	R-HSA-209822	INHBB; INHBC; INHBE	3626; 83729; 3625	12	12
	0.00864079	0.080411	melatonin degradation I	HumanCyc	PWY-6398	CYP2S1; CYP1B1; CYP2U1	113612; 29785; 1545	12	12
	0.00877214	0.0809774	Focal Adhesion-PI3K-Akt-mTOR-signaling pathway	Wikipathways	WP3932	ITGA9; ITGB2; ACACA; ITGB7; SOS1; CSF1R; COMP; LAMA3; SLC2A3; FN1; IRS2; VTN; AKT2; NOS1; ITGA11; LAMB3; PIK3CG; FGFR2; FGFR3; FGFR1	1311; 5294; 7448; 6654; 8660; 6515; 2263; 2260; 2261; 1436; 31; 3695; 22801; 2335; 3689; 3680; 3909; 4842; 3914; 208	302	302
	0.00883153	0.0809774	Lysosome Vesicle Biogenesis	Reactome	R-HSA-432720	AP4S1; ARRB1; AP4B1; VAMP7; M6PR	4074; 408; 6845; 11154; 10717	35	35
	0.00892505	0.0812375	Fatty acid metabolism	Reactome	R-HSA-8978868	MLYCD; PTGS2; CYP1B1; CYP8B1; SLC25A1; TECR; SLC25A20; ALOX5AP; SLC27A3; PTGIS; ACACA; PLA2G4A; FADS2; CYP2U1	1582; 5743; 113612; 23417; 6576; 9524; 9415; 1545; 5321; 788; 5740; 11000; 31; 241	189	185
	0.00905332	0.0818079	IRS-related events triggered by IGF1R	Reactome	R-HSA-2428928	SOS1; IRS2; AKT2; FGFR2; FGFR3; FGFR1	2260; 8660; 2263; 2261; 6654; 208	49	49
	0.00933615	0.0835963	Metapathway biotransformation Phase I and II	Wikipathways	WP702	HS3ST6; CHST12; CYP1B1; UGT1A10; CYP4F12; CYP8B1; HS3ST3A1; CYP2S1; NNMT; UGT1A9; NDST1; GAL3ST1; CYP2U1; HS3ST3B1	66002; 1545; 54600; 64711; 113612; 9955; 9514; 1582; 29785; 55501; 4837; 3340; 9953; 54575	186	186
	0.00938531	0.0835963	Eicosanoid Synthesis	Wikipathways	WP167	PTGS2; PLA2G4A; ALOX5AP; PTGIS	5740; 5743; 5321; 241	23	23
	0.00995144	0.0857859	Elastic fibre formation	Reactome	R-HSA-1566948	EFEMP1; MFAP4; EFEMP2; LTBP4; VTN	2202; 4239; 7448; 8425; 30008	36	36
	0.00995144	0.0857859	Signaling by RAS mutants	Reactome	R-HSA-6802949	FGG; FN1; FGA; FGB; ARRB1	2266; 408; 2244; 2243; 2335	36	36
	0.00995144	0.0857859	IGF signaling	INOH	None	IGFBP2; AKT2; IGFBP4; SOS1; IGFBP5	3488; 3485; 6654; 208; 3487	36	36
	0.00995642	0.0857859	Central carbon metabolism in cancer - Homo sapiens (human)	KEGG	path:hsa05230	G6PD; HK3; SLC7A5; AKT2; FGFR2; FGFR3; FGFR1	3101; 208; 2260; 2263; 2539; 8140; 2261	65	65
	0.0099751	0.0857859	IGF1R signaling cascade	Reactome	R-HSA-2428924	SOS1; IRS2; AKT2; FGFR2; FGFR3; FGFR1	2260; 8660; 2263; 2261; 6654; 208	50	50
Stage IV overrepresented pathways	p-value	q-value	pathway	source	external_id	members_input_overlap	members_input_overlap_geneids	size	effective_size
	6.37e-30	1.41e-26	Translation	Reactome	R-HSA-72766	RPN2; FAU; EIF3H; EIF3J; EIF3L; TSFM; EIF3B; EIF3D; EIF3G; RARS; MRPL50; IARS; MRPL33; MRPL38; RPL11; RPL12; EEF1D; MRPL43; UBA52; MRPL49; MRPL48; EIF4G1; RPS2; MRPL27; MRPL21; RPL4; RPS27A; EIF5B; YARS; MRPL12; TARS2; MRPL14; MRPL4; EIF4E; GARS; LARS; EIF4A1; EIF4A2; KARS; RPLP2; RPL35A; EIF2B1; RPS7; PPA2; SPCS1; RPS4Y2; SRPRB; VARS; ETF1; SRP72; RPS24; RPS25; RPS20; RPS28; EEF1B2; RPSA; SRP68;…	1965; 6124; 2107; 25873; 6748; 6205; 8667; 6206; 6233; 6155; 6230; 6301; 1974; 51520; 1981; 8664; 54534; 9255; 1650; 80222; 6229; 9789; 3735; 7453; 9669; 51073; 1968; 1938; 6135; 1983; 6218; 1973; 8666; 6185; 7284; 6234; 6136; 16; 219927; 51121; 6222; 2617; 10102; 6201; 6217; 6182; 58477; 9349; 6204; 6731; 51386; 8565; 1933; 8662; 6181; 6187; 8669; 6223; 2197; 6156; 64978; 6169; 1936; 6208; 1977;…	310	307
	1.03e-25	1.14e-22	Metabolism of proteins	Reactome	R-HSA-392499	RPN2; DYNLL1; HSPA5; SSR4; SUMO2; ETFB; MAN2A1; IKBKG; PMM2; RPL22; UBE2V2; TMED10; EIF3H; EIF3J; EIF3L; ACTB; STAT3; TSFM; DHRS4; COPE; EIF3D; MRPL33; EIF3G; NAPG; SUMO1; RARS; MRPL50; NUP214; CUL5; WDR61; NUP210; MTX2; IARS; UBE2G1; RPS12; TRIM25; IDH1; CTSC; NUP93; MRPL38; HSPA8; SEC24D; CTSZ; RPL11; RPL12; CSNK2A2; PSMC3; RHOT1; POC1B-GALNT4; USP5; EEF1D; H2AFX; TRAPPC4; H2AFZ; MRPL43; NUP107…	54165; 6155; 5371; 54534; 10890; 10471; 10693; 6201; 4580; 23165; 2197; 10528; 388753; 8310; 80349; 51035; 9255; 1650; 1460; 10254; 51073; 8883; 8693; 65264; 8332; 5716; 1936; 8021; 5476; 84061; 5706; 3093; 5699; 3015; 23203; 9789; 1938; 23243; 5373; 7284; 5202; 54927; 1977; 6902; 56648; 7314; 5954; 1974; 54734; 8667; 3921; 6233; 6230; 51520; 8664; 7453; 3309; 6223; 3417; 55611; 8295; 5611; 5686;…	2008	1999
	1.97e-21	1.46e-18	Metabolism of RNA	Reactome	R-HSA-8953854	NCBP2; HSPA8; PPIL1; PPIL3; SRSF10; ANP32A; FAU; RAN; NUP214; WDR61; NUP210; IMP4; NUP93; USP39; RPL11; RPL12; TFB1M; THOC2; DDX49; SNRPD3; GTF2F2; EIF4G1; PQBP1; UBA52; YBX1; NUP205; ELAVL1; RRP9; RPL4; NOP2; KRR1; EDC4; XPOT; SRSF5; SRSF4; SRSF2; SRSF9; EFTUD2; NXF1; ALYREF; LSM1; POLR2E; POLR2G; EIF4E; POLR2L; POLR2H; SNRPB2; RBM22; NUP155; EIF4A1; EIF4A3; EIF4A2; RPLP2; RPL35A; RPS7; RPS2; BC…	6627; 10236; 6155; 57122; 6229; 5903; 92856; 8683; 23165; 8125; 10528; 6156; 27258; 54517; 6135; 10189; 10643; 80349; 6124; 2107; 6187; 1994; 83443; 53938; 9652; 55660; 1478; 25873; 4839; 10713; 6136; 10644; 9136; 1981; 6204; 9716; 6222; 51106; 7311; 27316; 8021; 3312; 27257; 6146; 79869; 11103; 6234; 2963; 2091; 5436; 51729; 23644; 6206; 11260; 6201; 23225; 6629; 9343; 7529; 5580; 2521; 6427; 57…	586	584
	1.17e-19	6.46e-17	GTP hydrolysis and joining of the 60S ribosomal subunit	Reactome	R-HSA-72706	RPS12; RPS11; RPS10; RPS17; RPS16; RPS14; RPLP2; RPL4; RPS27A; RPS18; EIF5; RPS7; RPS2; FAU; EIF5B; EIF2S3; EIF2S2; RPS4Y2; EIF3J; EIF3L; EIF2S1; EIF3B; EIF3D; RPL23; EIF3G; RPL22; RPS19; EIF3H; RPS24; RPS25; RPS20; RPS28; RPL35A; RPL11; RPL12; EIF4E; RPL26L1; RPSA; RPL38; RPL36; EIF4G1; RPL30; UBA52; EIF4A1; RPL27; EIF4A2	6124; 1983; 51386; 6206; 6233; 6155; 6230; 8666; 8664; 6205; 6229; 6223; 1965; 6136; 9669; 8662; 6201; 1968; 1981; 9349; 6204; 6181; 25873; 6222; 2197; 6156; 6169; 6208; 7311; 51121; 1977; 6224; 140032; 6218; 1974; 6165; 8667; 8894; 6135; 6146; 6217; 1973; 6234; 3921; 6187; 8669	126	124
	2.31e-19	8.52e-17	Cap-dependent Translation Initiation	Reactome	R-HSA-72737	RPS12; RPS11; RPS10; RPS17; RPS16; RPS14; RPLP2; RPL4; RPS27A; RPS18; EIF5; EIF2B1; RPS7; RPS2; FAU; EIF5B; EIF2S3; EIF2S2; RPS4Y2; EIF3J; EIF3L; EIF2S1; EIF3B; EIF3D; RPL23; EIF3G; RPL22; RPS19; EIF3H; RPS24; RPS25; RPS20; RPS28; RPL35A; RPL11; RPL12; EIF4E; RPL26L1; RPSA; RPL38; RPL36; EIF4G1; RPL30; UBA52; EIF4A1; RPL27; EIF4A2	6124; 1983; 6206; 6233; 6155; 6230; 8666; 8664; 6205; 6229; 6223; 1965; 6136; 9669; 8662; 6201; 1968; 1981; 51386; 9349; 6204; 6181; 25873; 6222; 2197; 6156; 6169; 6208; 7311; 51121; 1977; 6224; 140032; 6218; 1974; 6165; 8667; 8894; 6135; 6146; 6217; 1973; 6234; 3921; 6187; 1967; 8669	133	131
	2.31e-19	8.52e-17	Eukaryotic Translation Initiation	Reactome	R-HSA-72613	RPS12; RPS11; RPS10; RPS17; RPS16; RPS14; RPLP2; RPL4; RPS27A; RPS18; EIF5; EIF2B1; RPS7; RPS2; FAU; EIF5B; EIF2S3; EIF2S2; RPS4Y2; EIF3J; EIF3L; EIF2S1; EIF3B; EIF3D; RPL23; EIF3G; RPL22; RPS19; EIF3H; RPS24; RPS25; RPS20; RPS28; RPL35A; RPL11; RPL12; EIF4E; RPL26L1; RPSA; RPL38; RPL36; EIF4G1; RPL30; UBA52; EIF4A1; RPL27; EIF4A2	6124; 1983; 6206; 6233; 6155; 6230; 8666; 8664; 6205; 6229; 6223; 1965; 6136; 9669; 8662; 6201; 1968; 1981; 51386; 9349; 6204; 6181; 25873; 6222; 2197; 6156; 6169; 6208; 7311; 51121; 1977; 6224; 140032; 6218; 1974; 6165; 8667; 8894; 6135; 6146; 6217; 1973; 6234; 3921; 6187; 1967; 8669	133	131
	3.44e-18	9.23e-16	Ribosomal scanning and start codon recognition	Reactome	R-HSA-72702	RPS12; RPS11; RPS10; RPS17; RPS16; RPS14; RPS19; RPS18; EIF5; RPS7; RPS27A; RPS2; FAU; EIF2S1; EIF2S3; EIF2S2; RPS4Y2; EIF3J; EIF3L; EIF3B; EIF3D; EIF3G; EIF3H; RPS24; RPS25; RPS20; RPS28; EIF4E; RPSA; EIF4G1; EIF4A1; EIF4A2	1965; 140032; 6223; 6218; 1974; 8894; 6222; 6205; 8666; 6206; 6230; 51386; 6217; 1973; 6208; 6234; 8664; 6201; 2197; 3921; 6187; 1981; 8662; 6229; 6233; 1977; 6224; 8667; 6204; 1968; 8669; 1983	68	66
	3.75e-18	9.23e-16	L13a-mediated translational silencing of Ceruloplasmin expression	Reactome	R-HSA-156827	RPS12; RPS11; RPS10; RPS17; RPS16; RPS14; RPLP2; RPL4; RPS27A; RPS18; RPL35A; RPS7; RPS2; FAU; EIF2S1; EIF2S3; EIF2S2; RPS4Y2; EIF3J; EIF3L; EIF3B; EIF3D; RPL23; EIF3G; RPL22; RPS19; EIF3H; RPS24; RPS25; RPS20; RPS28; RPL11; RPL12; EIF4E; RPL26L1; RPSA; RPL38; RPL36; EIF4G1; RPL30; UBA52; EIF4A1; RPL27; EIF4A2	6124; 51386; 6206; 6233; 6155; 6230; 8666; 8664; 6205; 6229; 6223; 1965; 6136; 8662; 6201; 1968; 1981; 9349; 6204; 6181; 25873; 6222; 2197; 6156; 6169; 6208; 7311; 51121; 1977; 6224; 140032; 6218; 1974; 6165; 8667; 8894; 6135; 6146; 6217; 1973; 6234; 3921; 6187; 8669	125	123
	3.75e-18	9.23e-16	SRP-dependent cotranslational protein targeting to membrane	Reactome	R-HSA-1799339	RPS12; RPS11; RPS10; RPS17; RPS16; SPCS2; RPS14; RPLP2; RPL4; RPS27A; RPS18; RPN2; RPS7; DDOST; RPS2; RPL22; SPCS1; RPS4Y2; SRP54; SRPRB; RPL27; SRP68; RPL23; FAU; SRP72; RPS19; RPS24; RPS25; RPS20; RPS28; RPL35A; RPL11; RPL12; SEC61G; SEC61B; SEC11A; RPL26L1; RPSA; RPL38; RPL36; RPL30; SSR1; UBA52; SSR4	6745; 6124; 6748; 9789; 6206; 6233; 6155; 6230; 1650; 6205; 6229; 6729; 6223; 6185; 6136; 51121; 6201; 58477; 9349; 6204; 6731; 6181; 25873; 6222; 2197; 6156; 6169; 6208; 7311; 6224; 140032; 6730; 6218; 23478; 6165; 6135; 6146; 6217; 6234; 28972; 3921; 6187; 10952; 23480	124	123
	2.14e-17	4.73e-15	UCH proteinases	Reactome	R-HSA-5689603	PSMB10; PSMD4; RPS27A; HIST1H2AM; HIST1H2AL; HIST1H2AI; HIST1H2AH; HIST1H2AK; HIST1H2AJ; HIST1H2AE; HIST1H2AD; HIST1H2AG; HIST1H2AA; HIST1H2AC; HIST1H2AB; RUVBL1; PSMA1; PSMA7; PSMA5; PSMC1; PSMA8; PSMC3; PSMC4; PSMC6; ACTL6A; PSMD14; HIST2H2AB; HIST2H2AC; HIST2H2AA3; OGT; PSMD10; PSMD13; UBA52; HIST2H2AA4; UBB; UBC; ACTB; PSMB4; HIST3H2A	5702; 723790; 143471; 8473; 8336; 10213; 8330; 5704; 92815; 8607; 8329; 7316; 8338; 8332; 221613; 3013; 5700; 317772; 5692; 5716; 5686; 5710; 85235; 8335; 3012; 86; 5688; 7314; 5682; 5706; 8337; 6233; 5719; 7311; 8331; 60; 5699; 8334; 8969	102	102
	3.7e-17	7.45e-15	Translation initiation complex formation	Reactome	R-HSA-72649	RPS12; RPS11; RPS10; RPS17; RPS16; RPS14; RPS19; RPS18; RPS7; RPS27A; RPS2; FAU; EIF2S1; EIF2S3; EIF2S2; RPS4Y2; EIF3J; EIF3L; EIF3B; EIF3D; EIF3G; EIF3H; RPS24; RPS25; RPS20; RPS28; EIF4E; RPSA; EIF4G1; EIF4A1; EIF4A2	1965; 140032; 6223; 6218; 1974; 6222; 6205; 8666; 8894; 6206; 6230; 51386; 6217; 1973; 6208; 6234; 8664; 6201; 2197; 3921; 6187; 1981; 8662; 6229; 6233; 1977; 6224; 8667; 6204; 1968; 8669	68	66
	6.35e-17	1.17e-14	Activation of the mRNA upon binding of the cap-binding complex and eIFs, and subsequent binding to 43S	Reactome	R-HSA-72662	RPS12; RPS11; RPS10; RPS17; RPS16; RPS14; RPS19; RPS18; RPS7; RPS27A; RPS2; EIF3G; EIF2S1; EIF2S3; EIF2S2; RPS4Y2; EIF3J; EIF3L; EIF3B; EIF3D; FAU; EIF3H; RPS24; RPS25; RPS20; RPS28; EIF4E; RPSA; EIF4G1; EIF4A1; EIF4A2	1965; 140032; 6223; 6218; 1974; 6222; 2197; 8666; 8894; 6206; 1981; 6230; 51386; 6217; 1973; 6208; 6234; 8664; 6201; 3921; 6187; 6205; 8662; 6229; 6233; 1977; 6224; 8667; 6204; 1968; 8669	69	67
	1.54e-16	2.62e-14	Vesicle-mediated transport	Reactome	R-HSA-5653656	DYNLL1; HSPA8; CHMP2A; KIF2A; PLIN3; TMED10; GAPVD1; BLOC1S3; HYOU1; TPD52; ITSN2; NAPG; CTSC; SEC24D; CTSZ; NAA38; PAFAH1B3; KIF5A; KIF5B; TRAPPC4; SFN; UBA52; GRB2; UBB; UBC; KLC1; COPB2; KLC4; CAPZB; HP; RPS27A; HSP90B1; SNAP29; DNM1; DNM3; COPZ1; MARCO; HSPH1; TXNDC5; RAB3GAP1; TFRC; RNF103-CHMP3; VTA1; PRKAB1; ARPC2; ARPC5; ARPC4; MAN2A1; DYNC1LI2; GDI1; BNIP1; ANKRD28; GBF1; TBC1D17; VPS53;…	51028; 79735; 55605; 832; 10890; 10282; 10092; 3312; 6714; 201475; 51534; 10226; 9363; 64786; 6455; 9342; 662; 55275; 50618; 2060; 2885; 26052; 51762; 29082; 7316; 7533; 2664; 8774; 10109; 56894; 22818; 4035; 10254; 10971; 7184; 23243; 811; 2810; 1075; 7311; 89953; 7163; 51594; 10972; 10342; 3320; 11316; 2804; 1759; 64708; 7529; 54732; 3831; 3796; 8685; 51164; 3240; 1783; 81567; 10484; 2017; 2306…	620	620
	9.66e-16	1.53e-13	Metalloprotease DUBs	Reactome	R-HSA-5689901	RPS27A; HIST1H2AM; HIST1H2AL; HIST1H2AI; HIST1H2AH; HIST1H2AK; HIST1H2AJ; HIST1H2AE; HIST1H2AD; HIST1H2AG; HIST1H2AA; HIST1H2AC; HIST1H2AB; HIST2H2AA3; HIST2H2AA4; HIST2H2AB; HIST2H2AC; PSMD14; UBA52; UBB; UBC; HIST3H2A	8338; 8337; 8335; 723790; 85235; 8332; 221613; 3013; 8336; 8331; 7316; 7311; 3012; 10213; 8330; 8334; 92815; 317772; 7314; 6233; 8969; 8329	36	36
	9.19e-15	1.36e-12	Formation of the ternary complex, and subsequently, the 43S complex	Reactome	R-HSA-72695	RPS12; RPS11; RPS10; RPS17; RPS16; RPS14; RPS19; RPS18; RPS7; RPS27A; RPS2; EIF3G; EIF2S1; EIF2S3; EIF2S2; RPS4Y2; EIF3J; EIF3L; EIF3B; EIF3D; FAU; EIF3H; RPS24; RPS25; RPS20; RPS28; RPSA	1965; 140032; 6223; 6218; 6222; 2197; 8666; 8894; 6206; 6230; 51386; 6217; 6208; 6234; 8664; 6201; 3921; 6187; 6205; 8662; 6229; 6233; 6224; 8667; 6204; 1968; 8669	61	59
	3.02e-14	4.19e-12	Membrane Trafficking	Reactome	R-HSA-199991	DYNLL1; HSPA8; CHMP2A; KIF2A; PLIN3; TMED10; GAPVD1; BLOC1S3; TPD52; ITSN2; NAPG; CTSC; SEC24D; CTSZ; RAB33A; PAFAH1B3; KIF5A; KIF5B; TRAPPC4; SFN; UBA52; GRB2; UBB; UBC; KLC1; COPB2; KLC4; CAPZB; RPS27A; SNAP29; DNM1; DNM3; COPZ1; TXNDC5; PRKAB1; TFRC; RNF103-CHMP3; VTA1; RAB3GAP1; ARPC2; ARPC5; ARPC4; MAN2A1; DYNC1LI2; GDI1; BNIP1; ANKRD28; GBF1; VPS53; LMAN1; ACTR3; RALA; FNBP1; CHMP3; SH3GL1;…	51028; 51534; 79735; 832; 10890; 10282; 10092; 3312; 6714; 10226; 9363; 64786; 6455; 9342; 662; 55275; 3799; 50618; 2060; 2885; 26052; 29082; 55605; 7316; 7533; 2664; 8774; 10109; 56894; 22818; 10254; 10971; 5050; 2810; 1075; 7311; 89953; 7163; 51594; 10972; 10342; 11316; 10093; 2804; 1759; 64708; 7529; 54732; 3831; 23243; 3796; 51164; 1783; 81567; 10484; 2017; 100526767; 55707; 51399; 8655; 8431…	582	582
	3.59e-14	4.68e-12	Neutrophil degranulation	Reactome	R-HSA-6798695	DYNLL1; MAN2B1; NME1-NME2; HSPA8; C5AR1; TXNDC5; GSDMD; COTL1; HSP90AB1; HEBP2; GUSB; FPR1; IDH1; CTSC; OSTF1; CTSZ; SERPINB1; PA2G4; UBR4; DBNL; ORM1; NME2; SNAP29; ACLY; CD300A; STBD1; NIT2; HP; MGST1; CCT2; GCA; ARPC5; RHOG; PDAP1; TOLLIP; PSMD14; TUBB; PSMD13; DNAJC3; CD14; SIRPB1; ORM2; GLA; ALDOA; KRT1; MAGT1; RNASET2; EEF1A1; PSMA5; NFKB1; PRDX4; CD63; ERP44; RAB10; HSP90AA1; CSNK2B; PPIA;…	929; 4831; 10549; 10890; 5646; 8826; 10092; 8635; 3312; 1992; 9342; 4257; 12; 391; 2588; 47; 29952; 2357; 3146; 9588; 5004; 960; 6093; 54472; 3615; 1650; 1460; 3326; 83858; 4125; 1075; 302; 8895; 654364; 30; 5476; 81567; 3320; 967; 5702; 5580; 23352; 1938; 10576; 4790; 5478; 51719; 3240; 5879; 84061; 1508; 221; 8655; 5005; 230; 26578; 25801; 2717; 56954; 8987; 23406; 1915; 10213; 23071; 728; 161;…	490	485
	4.5e-14	5.54e-12	Formation of a pool of free 40S subunits	Reactome	R-HSA-72689	RPS12; RPS11; RPS10; RPS17; RPS16; RPS14; RPLP2; RPL4; RPS27A; RPS18; RPL35A; RPS7; RPS2; FAU; RPS4Y2; EIF3J; EIF3L; EIF3B; EIF3D; RPL23; EIF3G; RPL22; RPS19; EIF3H; RPS24; RPS25; RPS20; RPS28; RPL11; RPL12; RPL26L1; RPSA; RPL38; RPL36; RPL30; UBA52; RPL27	6124; 51386; 6206; 6233; 6155; 6230; 8666; 8664; 6205; 6229; 6223; 6136; 8662; 6201; 9349; 6204; 6181; 25873; 6222; 2197; 6156; 6169; 6208; 7311; 51121; 6224; 140032; 6218; 6165; 8667; 6135; 6146; 6217; 6234; 3921; 6187; 8669	115	113
	7.52e-14	8.78e-12	Translation Factors	Wikipathways	WP107	EIF1; EIF5; EIF6; EIF2B1; EIF5B; EIF2S3; EIF2S2; EIF3H; EIF3J; EIF2S1; EIF3B; EIF3D; EIF3G; ETF1; EEF1A1; EIF5A; EEF1B2; EIF4E; EIF4G1; EIF2AK2; EIF4A1; EEF1D; EEF2; EIF4A2	8894; 3692; 1984; 1968; 1981; 1965; 1967; 9669; 1933; 1936; 1938; 1915; 10209; 1983; 1977; 5610; 1974; 1973; 8662; 8664; 8666; 8667; 8669; 2107	50	50
	1.2e-13	1.33e-11	Eukaryotic Translation Elongation	Reactome	R-HSA-156842	RPS12; RPS11; RPS10; RPS17; RPS16; RPS14; RPLP2; RPL4; RPS27A; RPS18; RPL35A; RPS7; RPS2; RPL22; RPS4Y2; RPL27; RPL23; FAU; EEF1A1; RPS19; RPS24; RPS25; RPS20; RPS28; EEF1B2; RPL11; RPL12; RPL26L1; RPSA; RPL38; RPL36; EEF1D; RPL30; UBA52; EEF2	6124; 6206; 6233; 6155; 6230; 6205; 6229; 1938; 6223; 6136; 6201; 9349; 6204; 1933; 6181; 25873; 6222; 2197; 6156; 6169; 1936; 6208; 7311; 51121; 6224; 140032; 6218; 6165; 6135; 6146; 6217; 6234; 1915; 3921; 6187	106	105
	1.29e-13	1.36e-11	Infectious disease	Reactome	R-HSA-5663205	NCBP2; CHMP4A; RPS27A; UBB; CTDP1; MAP2K2; MAP2K1; CHMP2A; FEN1; NUP37; TAF15; POLR2L; CHMP3; SH3GL1; SH3GL2; EPS15; RANBP1; RAN; STAM2; RAC1; FYN; HSP90AA1; RNF103-CHMP3; NUP214; CUL5; NUP210; NUP205; RANBP2; PABPN1; KPNA1; NUP107; NUP93; RANGAP1; POLR2E; POLR2G; AP2A1; NMT1; AP2A2; HCK; POLR2H; TAF7; RCC1; NELFCD; GTF2F2; VTA1; CALR; EIF2AK2; TAF9; MET; UBA52; GRB2; KPNA3; EEF2; NUP155; UBC; RB…	4836; 9688; 51534; 2534; 6879; 2885; 23225; 5605; 57122; 10254; 6880; 8065; 1938; 6455; 6456; 22916; 27243; 9844; 3055; 5478; 9150; 5879; 9631; 5903; 811; 100526767; 9978; 4233; 5604; 8106; 161; 5905; 23165; 2060; 2237; 3836; 7311; 51652; 5437; 79023; 5902; 8021; 7314; 1104; 8148; 29082; 5901; 51497; 160; 5434; 5441; 3320; 5610; 7316; 2963; 3839; 6233; 5436	253	251
	1.39e-13	1.4e-11	RNA transport - Homo sapiens (human)	KEGG	path:hsa03013	NCBP2; SUMO1; EEF1A1; SUMO2; PABPC4; SUMO4; EIF2B1; EIF3G; EIF2S1; EIF2S3; NXF1; EIF1B; ALYREF; RAN; EIF5B; EIF3B; EIF3D; STRAP; EIF1; NUP214; EIF2S2; NUP210; RANBP2; EIF3H; XPOT; NUP107; NUP93; RANGAP1; EIF5; RGPD3; EIF3J; RGPD4; EIF4E; THOC2; UBE2I; FXR1; SRRM1; EIF4A1; EIF4G1; NUP37; NUP205; NUP155; EIF4G2; TRNT1; EIF4A3; EIF4A2	285190; 10289; 8761; 387082; 8664; 10250; 23165; 7329; 7341; 79023; 653489; 23225; 8894; 11260; 10482; 5901; 5903; 5905; 9775; 57122; 8021; 57187; 1915; 22916; 8087; 51095; 9631; 11171; 1965; 1967; 1968; 1973; 1974; 1977; 1981; 1982; 1983; 9669; 10189; 6613; 8662; 9688; 8666; 8667; 8669; 10209	171	171
	1.73e-13	1.67e-11	Selenoamino acid metabolism	Reactome	R-HSA-2408522	RPS12; RPS11; RPS10; RPS17; RPS16; KARS; RPLP2; RPL4; RPS18; RPL35A; AIMP1; RPS7; IARS; RPS27A; RPS2; RPL22; RPS4Y2; PAPSS2; RPL27; RPS14; RPL23; FAU; RARS; RPS19; RPS24; RPS25; RPS20; RPS28; RPL11; RPL12; LARS; RPL26L1; RPSA; RPL38; RPL36; RPL30; UBA52; SARS; AHCY	6124; 6206; 51121; 6155; 6230; 6301; 51520; 9255; 6229; 6205; 3735; 6223; 6136; 6201; 9349; 6204; 6181; 191; 25873; 6222; 2197; 6156; 6169; 6208; 7311; 3376; 9060; 6224; 140032; 6218; 6165; 5917; 6135; 6146; 6217; 6234; 3921; 6187; 6233	130	129
	2.22e-13	1.98e-11	Disease	Reactome	R-HSA-1643685	AGK; NCBP2; CHMP2A; RAN; PIK3CD; ZC3HAV1; NUP214; CUL5; NUP210; ERBB2; ERBB4; IDH1; NUP93; RANGAP1; FXR1; NMT1; GTF2F2; PHB; AKAP9; KIT; UBA52; GRB2; KPNA3; UBB; FKBP1A; RBX1; ELMO1; NUP205; APBB1IP; RPS27A; FEN1; PIK3R3; RNF103-CHMP3; VTA1; KPNA1; CSK; UBC; POLR2E; POLR2G; POLR2L; POLR2H; TAF7; LMNB1; TAF9; NUP155; HDAC1; PDGFRA; CAPNS1; CTDP1; TAF15; HCK; CHMP3; SH3GL1; PIK3AP1; SH3GL2; STAT3; …	51534; 27044; 5605; 6880; 8065; 4233; 6714; 5903; 7529; 161; 23165; 2060; 2885; 79023; 8826; 2280; 8503; 8148; 29082; 56829; 7316; 3065; 2534; 57122; 10254; 6456; 6772; 3055; 811; 5245; 6879; 3836; 7311; 8021; 1104; 3320; 5610; 11052; 2963; 5436; 4001; 9150; 1020; 23225; 1938; 22916; 5478; 5879; 4140; 100526767; 5604; 8106; 9688; 27248; 5905; 6774; 51652; 8087; 5902; 7314; 160; 826; 5441; 5293; 5…	510	508
	2.24e-13	1.98e-11	Processing of Capped Intron-Containing Pre-mRNA	Reactome	R-HSA-72203	ELAVL1; NCBP2; SF3B5; HSPA8; SF3B2; PPIL1; PPIL3; SRSF10; POLR2L; CPSF7; RBMX; BCAS2; CPSF1; FUS; SRSF5; SRSF4; AQR; POLDIP3; HNRNPR; SRSF9; SNRPA1; PRPF40A; EFTUD2; NUP214; NUP210; RANBP2; PABPN1; NXF1; NUP107; NUP93; ALYREF; WBP11; LSM3; POLR2E; USP39; POLR2G; LSM2; EIF4E; THOC2; POLR2H; HNRNPUL1; SNRPB2; SNRPD3; GTF2F2; SRRM1; PRPF38A; SRSF2; CSTF1; PQBP1; NUP37; CSTF2; RBM22; EIF4A3; NUP155; …	6627; 10286; 1994; 51729; 83443; 10236; 4904; 6634; 23225; 6629; 9343; 57122; 84271; 10713; 9631; 57187; 1478; 22916; 10992; 2521; 1477; 84950; 5903; 10250; 79023; 8106; 10772; 51645; 9688; 53938; 11100; 8683; 23165; 9716; 55696; 5437; 27316; 8021; 9775; 27258; 6427; 10084; 3312; 29894; 55660; 6430; 79869; 5434; 5441; 57819; 6429; 10189; 10482; 2963; 1977; 5436	240	240
	3.29e-13	2.8e-11	Necroptosis - Homo sapiens (human)	KEGG	path:hsa04217	CHMP4A; HMGB1; BAX; HIST1H2AM; HIST1H2AL; CHMP2A; HIST1H2AI; HIST1H2AH; HIST1H2AK; HIST1H2AJ; HIST1H2AE; HIST1H2AD; HIST1H2AG; HIST1H2AA; HIST1H2AC; HIST1H2AB; STAT3; STAT1; HSP90AB1; H2AFZ; RNF103-CHMP3; PYCARD; HIST2H2AA3; HIST2H2AA4; H2AFJ; CAMK2D; CAMK2A; PPIA; CHMP1A; HIST2H2AB; HIST2H2AC; H2AFV; MAPK9; CASP1; EIF2AK2; H2AFX; GLUD2; CASP8; HIST3H2A; RBCK1; CHMP3; HSP90AA1; PPID; VDAC3	94239; 581; 3146; 8332; 27243; 3320; 6772; 6774; 8329; 8330; 8336; 8337; 8338; 3012; 100526767; 2747; 85235; 7419; 3326; 8969; 815; 817; 834; 841; 317772; 723790; 8331; 8334; 92815; 5478; 5481; 10616; 29082; 221613; 29108; 51652; 3013; 3014; 3015; 8335; 55766; 5601; 5610; 5119	162	162
	3.62e-13	2.97e-11	EGFR1	NetPath	Pathway_EGFR1	ACTA2; HDAC1; RPS10; DYNLL1; CRKL; PDPK1; GIT1; PIK3CD; ANXA4; ITGA3; PRPF4B; UBB; SCAMP3; MAP2K2; MAP2K1; CTTN; DNM1; RPS2; S100A10; STIP1; VIM; CAV2; IQGAP1; SH3GL2; YWHAZ; MINK1; UBASH3B; AHCYL1; STAT1; MPZL1; HNRNPR; STAT3; FYN; PRKCB; EPS15; TFRC; PIK3R3; PXN; EEF1A1; NFKB1; TAGLN2; MAPK9; CDK5; CCDC50; SRC; ANXA2; HSPE1; CSK; RAC1; EGFR; SRI; PRKCD; APPL1; PLEC; PRKAR1A; CFL1; PLEKHA5; ALDO…	5605; 6717; 23294; 10006; 6281; 6714; 10768; 5216; 1487; 9019; 6156; 2885; 10236; 8899; 8826; 8503; 5829; 152137; 6204; 54472; 59; 2534; 10254; 6456; 26060; 6772; 858; 5601; 54477; 1981; 60; 5058; 302; 8407; 10616; 5579; 5792; 10342; 7431; 55573; 6187; 6774; 4067; 1759; 1020; 3065; 5580; 4790; 3336; 5339; 5573; 5879; 2017; 5604; 8655; 3675; 84959; 56288; 7314; 160; 5293; 1915; 10096; 7037; 1956; …	457	455
	6.95e-13	5.5e-11	Nonsense Mediated Decay (NMD) independent of the Exon Junction Complex (EJC)	Reactome	R-HSA-975956	RPS12; RPS11; RPS10; RPS17; RPS16; NCBP2; RPS14; RPLP2; RPL4; RPS27A; RPS18; RPL35A; RPS7; RPS2; RPL22; RPS4Y2; RPL27; RPL23; FAU; ETF1; RPS19; RPS24; RPS25; RPS20; RPS28; RPL11; RPL12; RPL26L1; RPSA; RPL38; RPL36; EIF4G1; RPL30; UBA52	6124; 6206; 6233; 6155; 6230; 6205; 6229; 6223; 22916; 6136; 6201; 1981; 9349; 6204; 6181; 25873; 6222; 2197; 6156; 6169; 6208; 7311; 51121; 6224; 140032; 6218; 6165; 6135; 6146; 6217; 6234; 3921; 6187; 2107	106	105
	8.32e-13	6.35e-11	Peptide chain elongation	Reactome	R-HSA-156902	RPS12; RPS11; RPS10; RPS17; RPS16; RPS14; RPLP2; RPL4; RPS27A; RPS18; RPL35A; RPS7; RPS2; RPL22; RPS4Y2; RPL27; RPL23; FAU; EEF1A1; RPS19; RPS24; RPS25; RPS20; RPS28; RPL11; RPL12; RPL26L1; RPSA; RPL38; RPL36; RPL30; UBA52; EEF2	6124; 6206; 51121; 6155; 6230; 6205; 6229; 1938; 6223; 6233; 6136; 6201; 9349; 6204; 6181; 25873; 6222; 2197; 6156; 6169; 6208; 7311; 6224; 140032; 6218; 6165; 6135; 6146; 6217; 6234; 1915; 3921; 6187	101	100
	1.13e-12	8.37e-11	RHO GTPase Effectors	Reactome	R-HSA-195258	YWHAQ; DYNLL1; ACTG1; AHCTF1; LIMK1; KLC4; CTTN; ROCK2; HIST1H2AK; HIST1H2AJ; HIST1H2AE; HIST1H2AD; KIF2A; IQGAP1; HIST1H2AC; HIST1H2AB; YWHAZ; WASF2; MAD1L1; RAC1; YWHAH; H2AFZ; ARPC2; YWHAB; HIST2H2AA3; HIST2H2AA4; YWHAG; RANBP2; SRC; RAC2; BUB3; NUP107; CENPF; RANGAP1; ARPC5; ARPC4; DYNC1LI2; HIST1H2BA; CFL1; PDPK1; ZW10; RHOG; HIST2H2AC; TAX1BP3; ABI2; ARPC1B; KIF5B; ABI1; H2AFX; ROCK1; NUP37…	1783; 10096; 10109; 723790; 5063; 25909; 5217; 2885; 1063; 1072; 8330; 57122; 10152; 5879; 10006; 3796; 10092; 3014; 7534; 71; 7529; 5903; 30851; 6714; 10971; 3013; 55766; 6093; 7533; 2017; 5058; 5216; 60; 8655; 255626; 391; 5905; 3799; 10095; 7532; 3984; 9183; 8379; 8335; 89953; 3012; 3831; 9184; 2810; 8826; 8338; 8337; 5170; 5880; 8331; 3798; 94239; 79023; 9475; 8334; 10163; 10093; 3015	301	300
	3.5e-12	2.44e-10	Ub-specific processing proteases	Reactome	R-HSA-5689880	PSMB10; PSMD4; RPS27A; USP4; USP5; HIST1H2AM; HIST1H2AL; HIST1H2AE; HIST1H2AI; HIST1H2AH; HIST1H2AK; HIST1H2AJ; VDAC3; HIST1H2AD; HIST1H2AG; USP24; HIST1H2AA; USP22; HIST1H2AC; HIST1H2AB; IDE; RUVBL1; OTUB1; STAM2; PSMA1; PSMA7; HIST2H2AA4; PSMC1; PSMA8; PSMC3; PSMC4; PSMC6; PSMA5; TRRAP; USP10; HIST1H2BA; HIST2H2AB; HIST2H2AC; HIST2H2AA3; RHOT1; PSMD14; TAB1; PSMD10; PSMD13; UBA52; UBB; UBC; PSM…	255626; 5702; 723790; 143471; 8336; 6233; 7419; 10213; 8330; 5704; 10254; 92815; 8607; 8329; 7316; 7314; 8332; 221613; 3013; 55031; 5700; 8078; 317772; 5692; 5716; 55611; 8295; 5686; 5710; 85235; 23358; 8517; 8335; 3012; 5688; 23326; 8338; 3416; 5682; 5706; 8337; 5719; 7311; 9100; 8331; 10454; 55288; 5699; 8334; 7375; 8969	220	220
	3.53e-12	2.44e-10	Cytoplasmic Ribosomal Proteins	Wikipathways	WP477	RPS12; RPS11; RPS10; RPS17; RPS16; RPS14; RPLP2; RPL4; RPS18; RPL35A; RPS7; RPS27A; RPS2; FAU; RPL27; RPL23; RPL22; RPL38; RPS19; RPS24; RPS25; RPS20; RPS28; RPL11; RPL12; RPSA; RPS6KA6; RPL36; RPL30; UBA52	3921; 6124; 6222; 6224; 6155; 6156; 7311; 6146; 6217; 27330; 25873; 6169; 2197; 6165; 6204; 6205; 6206; 6201; 6208; 6218; 9349; 6187; 6223; 6181; 6229; 6136; 6135; 6234; 6230; 6233	88	88
	4.28e-12	2.79e-10	Nonsense Mediated Decay (NMD) enhanced by the Exon Junction Complex (EJC)	Reactome	R-HSA-975957	RPS12; RPS11; RPS10; RPS17; RPS16; NCBP2; RPS14; RPLP2; RPL4; RPS27A; RPS18; RPL35A; RPS7; RPS2; RPL22; RPS4Y2; RPL27; RPL23; FAU; ETF1; RPS19; RPS24; RPS25; RPS20; RPS28; RPL11; RPL12; RPL26L1; RPSA; RPL38; RPL36; EIF4G1; RPL30; UBA52; EIF4A3	6124; 6206; 6233; 6155; 6230; 6205; 6229; 6223; 22916; 6136; 6201; 1981; 9349; 6204; 6181; 25873; 6222; 2197; 6156; 6169; 6208; 7311; 51121; 6224; 140032; 6218; 9775; 6165; 6135; 6146; 6217; 6234; 3921; 6187; 2107	118	117
	4.28e-12	2.79e-10	Nonsense-Mediated Decay (NMD)	Reactome	R-HSA-927802	RPS12; RPS11; RPS10; RPS17; RPS16; NCBP2; RPS14; RPLP2; RPL4; RPS27A; RPS18; RPL35A; RPS7; RPS2; RPL22; RPS4Y2; RPL27; RPL23; FAU; ETF1; RPS19; RPS24; RPS25; RPS20; RPS28; RPL11; RPL12; RPL26L1; RPSA; RPL38; RPL36; EIF4G1; RPL30; UBA52; EIF4A3	6124; 6206; 6233; 6155; 6230; 6205; 6229; 6223; 22916; 6136; 6201; 1981; 9349; 6204; 6181; 25873; 6222; 2197; 6156; 6169; 6208; 7311; 51121; 6224; 140032; 6218; 9775; 6165; 6135; 6146; 6217; 6234; 3921; 6187; 2107	118	117
	7.67e-12	4.86e-10	miR-targeted genes in lymphocytes - TarBase	Wikipathways	WP2004	CDCP1; ACP2; PRPF40A; CARHSP1; SNX6; PPP3R1; TPM3; MYO1E; EGFR; DOCK7; SNAP29; EIF4E; ATP6V1F; ANP32B; MAGT1; ADPGK; KIT; CPNE8; TMED10; UHRF1; NAPG; BET1; RAB34; SRPRB; CSDE1; MPZL1; RHOG; DNAJB1; YWHAQ; ABHD10; ABHD11; C1QBP; HSDL1; CHMP2A; ATG3; RARS; CBFB; GAK; MTX1; ARHGDIA; NCL; PPP1R7; SRSF10; ATP2A2; SMC1A; PDLIM5; ANXA2; ATAD3B; NOTCH2; IDH1; CTSC; FAM96A; NCEH1; CPOX; MTPN; TMEM109; SRS…	55347; 83440; 83442; 3337; 5917; 528; 64422; 83871; 136319; 7412; 84191; 5792; 7170; 58533; 57532; 5530; 5536; 5534; 8243; 80155; 79711; 3417; 1371; 10282; 3839; 1956; 822; 708; 391; 396; 9019; 10971; 10972; 7127; 865; 84061; 83693; 51497; 55660; 7812; 5757; 4233; 10611; 10541; 58477; 79188; 57552; 2580; 10642; 160; 6009; 9342; 83858; 23423; 10484; 9296; 1977; 83451; 5479; 1075; 64866; 5510; 53; …	489	489
	8.85e-12	5.45e-10	miR-targeted genes in muscle cell - TarBase	Wikipathways	WP2005	CDCP1; CARHSP1; SNX6; ACP2; TPM3; MYO1E; EGFR; DOCK7; SNAP29; EIF4E; CHMP2A; ANP32B; MAGT1; THBS1; CPNE8; TMED10; UHRF1; BET1; RAB34; SRPRB; CSDE1; MPZL1; RHOG; DNAJB1; YWHAQ; ABHD10; SPARC; C1QBP; HSDL1; NAPG; RARS; CBFB; GAK; ARHGDIA; NCL; PPP1R7; SRSF10; ATP2A2; ERBB2; PDLIM5; ATAD3B; NOTCH2; NCEH1; CTSC; FAM96A; CA12; CPOX; MTPN; TMEM109; NAA15; GFPT1; IGF2BP1; TMED3; CAPG; NUFIP2; IPO4; SEC2…	55347; 83442; 3337; 7127; 5917; 528; 83871; 136319; 6009; 84191; 5792; 7170; 57532; 5530; 80155; 79711; 1371; 10282; 3839; 1956; 4035; 822; 708; 391; 396; 9019; 10971; 10972; 865; 84061; 83693; 51497; 771; 7812; 58533; 5757; 4233; 10611; 2064; 10541; 6678; 58477; 79188; 2580; 10642; 9342; 83858; 23423; 10484; 1977; 5479; 1075; 7057; 64866; 5510; 4643; 53; 29128; 8683; 6902; 3815; 2673; 27243; 877…	400	400
	1.1e-11	6.48e-10	mRNA Splicing - Major Pathway	Reactome	R-HSA-72163	ELAVL1; NCBP2; SF3B5; HSPA8; SF3B2; PPIL1; PPIL3; SRSF10; CPSF7; RBMX; BCAS2; CPSF1; FUS; SRSF5; SRSF4; AQR; HNRNPR; SRSF9; SNRPA1; PRPF40A; EFTUD2; PABPN1; ALYREF; WBP11; LSM3; POLR2E; USP39; POLR2G; LSM2; POLR2L; POLR2H; HNRNPUL1; SNRPB2; SNRPD3; GTF2F2; SRRM1; PRPF38A; SRSF2; CSTF1; PQBP1; CSTF2; RBM22; YBX1; EIF4A3	6627; 10286; 1994; 51729; 83443; 10236; 4904; 6634; 55660; 6629; 9343; 10713; 1478; 22916; 10992; 2521; 1477; 84950; 10250; 51645; 8106; 53938; 11100; 8683; 9716; 55696; 5437; 27316; 9775; 27258; 6427; 10084; 3312; 10772; 29894; 6430; 79869; 5434; 5441; 57819; 6429; 10189; 2963; 5436	178	178
	1.16e-11	6.48e-10	Eukaryotic Translation Termination	Reactome	R-HSA-72764	RPS12; RPS11; RPS10; RPS17; RPS16; RPS14; RPLP2; RPL4; RPS27A; RPS18; RPL35A; RPS7; RPS2; RPL22; RPS4Y2; RPL27; RPL23; FAU; ETF1; RPS19; RPS24; RPS25; RPS20; RPS28; RPL11; RPL12; RPL26L1; RPSA; RPL38; RPL36; RPL30; UBA52	6124; 6206; 6233; 6155; 6230; 6205; 6229; 6223; 6136; 6201; 9349; 6204; 6181; 25873; 6222; 2197; 6156; 6169; 6208; 7311; 51121; 6224; 140032; 6218; 6165; 6135; 6146; 6217; 6234; 3921; 6187; 2107	104	103
	1.16e-11	6.48e-10	Selenocysteine synthesis	Reactome	R-HSA-2408557	RPS12; RPS11; RPS10; RPS17; RPS16; RPS14; RPLP2; RPL4; RPS27A; RPS18; RPL35A; RPS7; RPS2; RPL22; RPS4Y2; RPL27; RPL23; FAU; RPS19; RPS24; RPS25; RPS20; RPS28; RPL11; RPL12; RPL26L1; RPSA; RPL38; RPL36; RPL30; UBA52; SARS	6124; 6206; 6233; 6155; 6230; 6301; 6205; 6229; 6223; 6136; 6201; 9349; 6204; 6181; 25873; 6222; 2197; 6156; 6169; 6208; 7311; 51121; 6224; 140032; 6218; 6165; 6135; 6146; 6217; 6234; 3921; 6187	104	103
	1.17e-11	6.48e-10	Protein processing in endoplasmic reticulum - Homo sapiens (human)	KEGG	path:hsa04141	HSPA2; RPN2; HSPA5; HSPA8; GANAB; BAX; SEC63; DDOST; FBXO6; TXNDC5; HSPA1L; HSPH1; HYOU1; EIF2S1; DNAJB1; HSP90AB1; DNAJB11; NSFL1C; UBE2G1; MAPK9; P4HB; UGGT1; PDIA6; ERLEC1; PDIA4; PDIA3; SEC24D; LMAN1; HSP90B1; RBX1; SEC61G; PLAA; SEC61B; SEC23A; CALR; EIF2AK2; DNAJC1; DNAJC3; SSR1; SSR4; HSP90AA1; CKAP4	51726; 7184; 6185; 56886; 10808; 581; 6745; 6748; 27248; 1650; 9871; 9373; 7326; 81567; 55968; 10952; 64215; 10970; 3305; 3306; 3309; 3312; 10484; 3320; 9978; 3326; 9601; 3337; 10525; 811; 11231; 2923; 10130; 23193; 3998; 5034; 1965; 23480; 26270; 5601; 5610; 5611	165	165
	1.37e-11	7.41e-10	Innate Immune System	Reactome	R-HSA-168249	BCL2L1; DYNLL1; ACTG1; PPP3R1; MAN2B1; NME1-NME2; HSPA8; LY96; C5AR1; IKBKG; TXNDC5; AHCYL1; GSDMD; COTL1; HSP90AB1; CNPY3; ATP6V0D1; GUSB; CTSL; TRIM25; IDH1; CTSC; OSTF1; CTSZ; SERPINB1; PA2G4; UBR4; DBNL; ORM1; NME2; ARPC1B; SNAP29; UBA52; GRB2; UBB; UBC; ACLY; ACTB; CD300A; PAK1; STBD1; NIT2; ATP6V1F; HP; RPS27A; HSP90B1; MGST1; DNM1; DNM3; MAPKAPK3; CCT2; CARD9; TMEM189-UBE2V1; MYD88; GCA; A…	3428; 80301; 929; 598; 10549; 10890; 9140; 5646; 8826; 10006; 10092; 8635; 30; 8411; 5170; 528; 717; 1992; 5702; 7706; 4257; 3312; 12; 391; 2885; 4831; 26052; 2588; 47; 834; 29952; 7867; 2357; 3146; 9588; 5004; 7316; 960; 6093; 54472; 245973; 10695; 10109; 51311; 4332; 5476; 1650; 1460; 3326; 1938; 3417; 7184; 4125; 5601; 23643; 1075; 60; 7318; 302; 5534; 8895; 3984; 7311; 28988; 654364; 71; 1016…	1077	1065
	1.53e-11	8.08e-10	Immune System	Reactome	R-HSA-168256	BCL2L1; RBCK1; HECTD1; DYNLL1; ACTG1; PPP3R1; MAN2B1; SUMO1; NME1-NME2; HSPA8; SERPINB1; C5AR1; IKBKG; TXNDC5; AHCYL1; HSPA5; ACTB; PIK3CD; COTL1; HSP90AB1; RNF114; CNPY3; CUL5; ATP6V0D1; GUSB; HLA-DPB1; IFITM1; CTSL; TAP1; CAMK2D; TRIM25; CTSB; IFI35; CAMK2A; OSTF1; SEC24D; CTSZ; LY96; PA2G4; UBR4; DBNL; ORM1; NME2; EIF4G2; EIF4G1; SNAP29; UBA52; GRB2; UBB; UBC; ACLY; TLR8; ABCE1; ELMO1; RNF213;…	929; 4831; 10549; 5371; 10890; 815; 10006; 8635; 1982; 10768; 834; 2357; 3146; 3615; 2534; 55905; 1650; 1460; 8519; 65264; 57674; 5601; 5534; 23643; 3984; 5476; 81567; 3093; 10093; 64170; 1759; 83858; 3663; 200081; 4790; 3430; 4600; 4615; 817; 3240; 1508; 5005; 1977; 7314; 1974; 475; 6233; 118788; 11333; 6813; 1072; 3309; 23376; 3614; 9844; 80301; 7525; 3417; 5686; 8517; 1445; 2634; 29110; 5719; …	1840	1827
	1.62e-11	8.36e-10	Cellular responses to external stimuli	Reactome	R-HSA-8953897	HSPA2; NUP210; MAP4K4; HSPA5; RPA1; PRDX5; HSPA8; HIST1H2AE; TNIK; RPTOR; RPS27A; H2AFZ; HIST1H2AK; HIST1H2AJ; NUP37; HIST1H2AD; STIP1; MAPKAPK3; HIST1H2AC; HSPA1L; EEF1A1; MINK1; HSPH1; GABARAPL2; DYNLL1; ATG16L1; DNAJB1; HSPB1; HSP90AB1; ATG3; NBN; PRDX6; NUP214; NFKB1; MAPK9; HIST2H2AA4; RANBP2; CDKN2C; NR3C1; MTMR14; FKBP5; PRKAB1; NUP107; CAMK2D; P4HB; NUP93; CAMK2A; NUP155; ATG12; LMNB1; HI…	3007; 8897; 6118; 57122; 9140; 815; 3014; 3312; 3305; 23165; 64419; 8338; 7867; 9588; 8331; 7316; 3008; 2876; 723790; 6117; 25824; 3326; 2908; 3013; 5601; 4683; 27000; 51182; 7311; 8021; 64422; 8337; 3320; 8334; 3015; 94239; 4001; 6767; 23225; 255626; 6009; 4790; 5903; 3006; 817; 55766; 8655; 9688; 3009; 3315; 55054; 7314; 5564; 9448; 5034; 1915; 6233; 871; 8330; 3309; 9631; 50488; 1031; 3306; 11…	414	413
	2.36e-11	1.19e-09	Cellular responses to stress	Reactome	R-HSA-2262752	HSPA2; MAP4K4; HSPA5; PRDX6; PRDX5; HSPA8; HIST1H2AE; TNIK; H2AFZ; HIST1H2AK; HIST1H2AJ; NUP37; HIST1H2AD; STIP1; MAPKAPK3; HIST1H2AC; HSPA1L; RPTOR; H2AFX; HSPH1; DNAJB1; HSPB1; HSP90AB1; NBN; EEF1A1; NUP214; NFKB1; MAPK9; HIST2H2AA4; RANBP2; CDKN2C; NR3C1; RPS27A; FKBP5; NUP155; NUP107; CAMK2D; P4HB; NUP93; CAMK2A; MINK1; LMNB1; HIST1H2BA; RBX1; HIST1H1D; HIST1H1E; HIST2H2AC; HIST1H1B; HIST1H1C…	3007; 6118; 57122; 815; 3014; 3312; 5903; 3305; 9448; 23165; 8338; 7867; 9588; 8331; 7316; 3008; 2876; 723790; 6117; 25824; 3326; 2908; 3013; 5601; 4683; 27000; 51182; 7311; 8021; 8337; 8335; 3320; 8334; 3015; 94239; 4001; 6767; 23225; 255626; 4790; 3006; 817; 55766; 9688; 3009; 3315; 7314; 1031; 5034; 1915; 6233; 871; 8330; 3309; 50488; 9631; 3306; 79023; 9978; 23043; 57521; 3012; 10808; 10963; …	345	344
	5.31e-11	2.62e-09	mRNA Splicing	Reactome	R-HSA-72172	ELAVL1; NCBP2; SF3B5; HSPA8; SF3B2; PPIL1; PPIL3; SRSF10; CPSF7; RBMX; BCAS2; CPSF1; FUS; SRSF5; SRSF4; AQR; HNRNPR; SRSF9; SNRPA1; PRPF40A; EFTUD2; PABPN1; ALYREF; WBP11; LSM3; POLR2E; USP39; POLR2G; LSM2; POLR2L; POLR2H; HNRNPUL1; SNRPB2; SNRPD3; GTF2F2; SRRM1; PRPF38A; SRSF2; CSTF1; PQBP1; CSTF2; RBM22; YBX1; EIF4A3	6627; 10286; 1994; 51729; 83443; 10236; 4904; 6634; 55660; 6629; 9343; 10713; 1478; 22916; 10992; 2521; 1477; 84950; 10250; 8106; 53938; 11100; 8683; 9716; 51645; 55696; 5437; 27316; 9775; 27258; 6427; 10084; 3312; 10772; 29894; 6430; 79869; 5434; 5441; 57819; 6429; 10189; 2963; 5436	186	186
	9.92e-11	4.78e-09	eukaryotic protein translation	BioCarta	eifpathway	EIF1; EIF4G1; EIF5; EIF6; EIF5B; EIF4A1; EIF4G2; EIF4E; EIF4A2; EIF2S1; EIF2S3; EIF2S2	9669; 10209; 3692; 1965; 8894; 1977; 1982; 1968; 1983; 1974; 1981; 1973	17	16
	1.18e-10	5.56e-09	Signaling by Rho GTPases	Reactome	R-HSA-194315	CTTN; DYNLL1; ACTG1; AHCTF1; HIST1H2AK; AKAP13; LIMK1; ARHGAP18; HIST1H2AE; RHOT1; RHOT2; HIST1H2AJ; CFL1; HIST1H2AD; KIF2A; IQGAP1; HIST1H2AC; HIST1H2AB; YWHAZ; ARHGAP30; WASF2; MAD1L1; YWHAQ; TAX1BP3; YWHAH; H2AFZ; ARHGDIB; ARPC2; YWHAB; NUP37; HIST2H2AA3; HIST2H2AA4; YWHAG; RANBP2; ARHGEF6; SRC; RAC2; RAC3; BUB3; NUP107; CENPF; ARHGDIA; RANGAP1; ARPC5; ARPC4; ACTR3; HIST1H2BA; DYNC1LI2; PDPK1;…	57122; 10006; 10092; 3014; 6714; 10672; 5216; 5881; 3799; 8826; 8338; 8331; 6093; 7533; 2664; 10109; 723790; 1063; 10971; 55288; 3013; 2810; 60; 5058; 397; 3984; 89953; 3831; 89941; 71; 10163; 8379; 8337; 5903; 8334; 10093; 5063; 94239; 25909; 5217; 255626; 7529; 1783; 3796; 257106; 55766; 5879; 2017; 8655; 5905; 10095; 9459; 9183; 9184; 5880; 3798; 11214; 10096; 9475; 1072; 8330; 10152; 7532; 30…	435	430
	2.44e-10	1.12e-08	Ribosome - Homo sapiens (human)	KEGG	path:hsa03010	RPS12; MRPL27; RPS10; RPS17; RPS16; RPS14; RPLP2; RPS19; RPS18; RPS24; RPS7; RPS27A; RPS2; MRPL21; FAU; RPS4Y2; RPL27; RPL23; RPL22; RPL4; MRPL12; RPS25; MRPL14; MRPL33; RPS20; RPS28; RPL35A; MRPL4; RPL11; RPL12; RPL26L1; RPS10-NUDT3; RPSA; RPL38; RPL36; RPL30; UBA52; RPS11	6146; 100529239; 6156; 6155; 6165; 6169; 6181; 6182; 6187; 6201; 6204; 6205; 6206; 51264; 6208; 6217; 6218; 6222; 6223; 6224; 6229; 6230; 6233; 6234; 9349; 7311; 2197; 140032; 25873; 219927; 3921; 51073; 64928; 51121; 9553; 6124; 6135; 6136	153	153
	2.49e-10	1.13e-08	PDGFR-beta signaling pathway	PID	pdgfrbpathway	ACTA2; CTTN; EIF2AK2; MAP2K2; MAP2K1; IQGAP1; YES1; YWHAZ; STAT3; STAT1; YWHAQ; FYN; YWHAH; ARHGDIA; YWHAB; LYN; MAPK9; YWHAG; SRC; CSK; RAC1; ARPC2; PRKCD; ARPC5; ARPC4; HCK; LRP1; WASF2; ARPC1B; ABI1; SFN; GRB2; ACTR3; PAK1	4067; 59; 10096; 10109; 2534; 5605; 7529; 4035; 5580; 10006; 10092; 6772; 3055; 6714; 10971; 5601; 5879; 2017; 7525; 2810; 5604; 5058; 10095; 7532; 2885; 8826; 10163; 7533; 1445; 396; 5610; 7534; 6774; 10093	127	127
	2.68e-10	1.19e-08	EPHB-mediated forward signaling	Reactome	R-HSA-3928662	SRC; ACTG1; RAC1; ARPC2; LIMK1; FYN; ROCK1; ROCK2; ARPC4; ARPC5; CFL1; ARPC1B; LYN; ACTR3; ACTB; YES1; PAK1	4067; 10092; 10096; 10109; 9475; 10095; 6714; 3984; 5879; 6093; 7525; 1072; 10093; 71; 60; 2534; 5058	35	35
	2.75e-10	1.19e-08	HIV Infection	Reactome	R-HSA-162906	NCBP2; CHMP4A; RPS27A; UBB; CTDP1; CHMP2A; FEN1; NUP37; TAF15; POLR2L; CHMP3; RANBP1; RAN; RAC1; FYN; RNF103-CHMP3; NUP214; CUL5; NUP210; RANBP2; KPNA1; NUP107; NUP93; RANGAP1; POLR2E; POLR2G; AP2A1; NMT1; AP2A2; HCK; POLR2H; TAF7; RCC1; NELFCD; GTF2F2; VTA1; TAF9; UBA52; PPIA; NUP155; UBC; RBX1; ELMO1; NUP205	51534; 2534; 6879; 9688; 23225; 57122; 6880; 8065; 22916; 27243; 9844; 3055; 5478; 9150; 5879; 9631; 5903; 79023; 9978; 161; 5905; 23165; 29082; 7311; 51652; 3836; 5437; 100526767; 5902; 8021; 7314; 1104; 8148; 5901; 51497; 4836; 160; 5434; 5441; 7316; 2963; 2237; 6233; 5436	197	195
	6.62e-10	2.82e-08	miR-targeted genes in squamous cell - TarBase	Wikipathways	WP2006	ATP6V1F; ATP2A2; TPM3; CHMP2A; ANP32B; MAGT1; TMED10; BET1; RAB34; SRPRB; CSDE1; MPZL1; DNAJB1; YWHAQ; SRSF9; PRPF40A; THBS1; RARS; CBFB; ANXA2; IDH1; FAM96A; PPP1R7; MTPN; CPNE8; AP2A1; VCAM1; SEC23A; PTMA; SH3BGRL3; TBCA; MET; TMEM189-UBE2V1; NCL; GFPT1; ATP6V1C1; RHEB; TMEM43	7812; 3417; 83442; 7057; 10282; 3337; 5510; 4233; 5917; 55660; 387522; 8683; 6902; 9019; 10971; 10972; 528; 302; 10541; 136319; 2673; 83871; 6009; 27243; 58477; 7412; 84191; 79188; 160; 865; 84061; 144402; 7170; 4691; 10484; 488; 9296; 5757	158	158
	9.47e-10	3.96e-08	miR-targeted genes in epithelium - TarBase	Wikipathways	WP2002	CDCP1; PRPF40A; SNX6; ACP2; TPM3; MYO1E; EGFR; DOCK7; CHMP2A; ANP32B; MAGT1; ADPGK; KIT; CPNE8; TMED10; PPP1R7; TRIP13; TMED3; CSDE1; PTPRF; DNAJB1; YWHAQ; SRSF9; C1QBP; ATG3; RARS; GAK; MTX1; ARHGDIA; ATP2A2; SMC1A; PDLIM5; ANXA2; ATAD3B; IDH1; CTSC; FAM96A; CA12; MTPN; TMEM109; RAB34; CAPG; NUFIP2; LRP1; NELFCD; PTMA; PPP5C; MPZL1; SNAP29; NOTCH2; TNFAIP2; MET; TMEM189-UBE2V1; NCL; GNA13; GFPT1…	7812; 4853; 3417; 7127; 6009; 5479; 83440; 1075; 1956; 5757; 4233; 51497; 53; 10611; 822; 8683; 396; 5510; 10972; 64422; 4643; 302; 5792; 3815; 27243; 10541; 9319; 5917; 2673; 83871; 708; 3337; 10971; 84191; 79188; 2580; 387522; 79073; 84061; 9342; 10672; 144402; 7170; 83858; 85440; 58533; 136319; 23423; 55660; 9019; 4691; 771; 57532; 5536; 488; 8243; 64866; 10772; 4035; 79711; 4580	333	333
	1.17e-09	4.81e-08	Spliceosome - Homo sapiens (human)	KEGG	path:hsa03040	HSPA2; NCBP2; SF3B5; HSPA8; TCERG1; SF3B2; PPIL1; RBMXL2; SRSF10; BCAS2; HSPA1L; SRSF5; SRSF4; AQR; SRSF9; SRSF8; PRPF40A; EFTUD2; TRA2A; ALYREF; WBP11; LSM3; USP39; LSM2; THOC2; SNRPB2; SNRPD3; SNRPA1; PRPF38A; SRSF2; PQBP1; RBMX; RBM22; EIF4A3	51729; 10286; 9775; 10772; 27258; 9343; 55660; 27288; 8683; 10915; 10929; 27316; 3305; 3306; 3312; 22916; 6429; 6430; 57187; 10084; 6634; 55696; 10992; 29896; 51645; 10189; 84950; 10713; 57819; 6627; 6629; 83443; 9716; 6427	134	134
	2.47e-09	9.94e-08	Cellular response to heat stress	Reactome	R-HSA-3371556	HSPA2; HSPA5; EEF1A1; HSPA8; DNAJC2; HSPA1L; RPTOR; HSPH1; DNAJB1; HSPB1; HSP90AB1; NUP214; NUP210; RANBP2; UBB; NUP107; CAMK2D; NUP93; CAMK2A; HSPA14; RPA1; NUP37; RPA2; NUP155; HSP90AA1; SERPINH1; NUP205; ST13	871; 6767; 6118; 23225; 6117; 57122; 815; 3309; 3326; 9631; 3306; 817; 5903; 3305; 79023; 9688; 23165; 27000; 3315; 57521; 51182; 8021; 10808; 7314; 3312; 3320; 1915; 3337	99	99
	3.67e-09	1.45e-07	Alpha6Beta4Integrin	NetPath	Pathway_Alpha6Beta4Integrin	FYN; EGFR; EIF6; CD151; YES1; YWHAZ; YWHAQ; PIK3CD; YWHAH; PIK3R3; YWHAB; ERBB2; SRC; RAC1; PRKCD; PLEC; EIF4E; RPSA; VIM; SFN; MET; GRB2; PAK1	3692; 6714; 10971; 2534; 5293; 7431; 1956; 2885; 2064; 5339; 5879; 3921; 7534; 1977; 7525; 977; 7529; 2810; 5580; 7533; 4233; 8503; 5058	71	71
	3.79e-09	1.47e-07	Deubiquitination	Reactome	R-HSA-5688426	PSMB10; PSMD4; RPS27A; USP4; USP5; HIST1H2AM; HIST1H2AL; HIST1H2AI; HIST1H2AH; HIST1H2AK; HIST1H2AJ; HIST1H2AE; HIST1H2AD; HIST1H2AG; USP24; HIST1H2AA; USP22; HIST1H2AC; HIST1H2AB; IDE; RUVBL1; OTUB1; STAM2; PSMA1; PSMA7; HIST2H2AA4; PSMC1; PSMA8; PSMC3; PSMC4; PSMC6; TRIM25; PSMA5; TRRAP; USP10; HIST1H2BA; HIST2H2AB; HIST2H2AC; HIST2H2AA3; OGT; RHOT1; PSMD14; TAB1; PSMD10; PSMD13; VDAC3; UBA52; …	255626; 5702; 221613; 723790; 143471; 8473; 8336; 10213; 8330; 5704; 10254; 8607; 8329; 7316; 7314; 6233; 8332; 3013; 55031; 5700; 8078; 317772; 5692; 5716; 7706; 55611; 8295; 5686; 5710; 85235; 23358; 8517; 8335; 3012; 92815; 86; 5688; 23326; 8338; 7419; 3416; 5682; 5706; 8337; 5719; 7311; 9100; 8331; 10454; 55288; 5699; 8334; 60; 7375; 8969	296	296
	4.05e-09	1.55e-07	TNFalpha	NetPath	Pathway_TNFalpha	HDAC1; BCL2L1; RPS11; SUMO1; RPL4; EGFR; FKBP5; DIABLO; NSMAF; YWHAZ; STAT1; RPL30; YWHAQ; HSP90AB1; YWHAH; TBK1; YWHAB; NFKB1; MAPK9; YWHAG; PSMD13; SRC; PFDN2; HSPB1; IKBKG; PRKCD; TXLNA; PML; PSMC1; POLR2L; POLR2H; UBE2I; PSMC3; SOS2; TAB1; FBL; CASP8; PDK1; KPNA6; GRB2; KPNA3; ACTL6A; G3BP2; HSP90AA1; COPB2; PAK1; MTIF2	6124; 5702; 3065; 2885; 6205; 1956; 56616; 7529; 5580; 3326; 7532; 200081; 4790; 6772; 6714; 10971; 5202; 8439; 841; 5601; 4528; 6655; 9276; 5058; 7329; 23633; 2091; 6156; 3315; 8517; 86; 2289; 5437; 598; 9908; 5371; 29110; 5719; 5441; 7341; 3320; 10454; 7534; 5700; 3839; 5163; 7533	234	234
	4.24e-09	1.59e-07	HIV Life Cycle	Reactome	R-HSA-162587	NCBP2; CHMP4A; RPS27A; UBB; CTDP1; CHMP2A; FEN1; NUP37; TAF15; CHMP3; RAN; RNF103-CHMP3; NUP214; VTA1; RANBP2; NUP155; NUP107; NUP93; RANGAP1; POLR2E; POLR2G; NMT1; POLR2L; POLR2H; TAF7; RCC1; NELFCD; GTF2F2; RANBP1; TAF9; NUP210; UBA52; PPIA; KPNA1; UBC; NUP205	51534; 6879; 23225; 57122; 6880; 9631; 22916; 27243; 5478; 9150; 5903; 79023; 9688; 5905; 23165; 29082; 7311; 51652; 3836; 5437; 100526767; 5902; 8021; 7314; 1104; 8148; 5901; 51497; 4836; 5434; 5441; 7316; 2963; 2237; 6233; 5436	156	154
	4.3e-09	1.59e-07	Host Interactions of HIV factors	Reactome	R-HSA-162909	RPS27A; RAN; RAC1; FYN; NUP214; CUL5; RANBP1; RANBP2; UBB; NUP107; NUP93; RANGAP1; NUP155; AP2A1; AP2A2; HCK; RCC1; NUP210; NUP37; UBA52; PPIA; KPNA1; UBC; RBX1; ELMO1; NUP205	2534; 23225; 57122; 8065; 9844; 3055; 5478; 5879; 9631; 5903; 79023; 9978; 161; 9688; 5905; 23165; 3836; 7311; 5902; 8021; 7314; 1104; 5901; 160; 7316; 6233	89	89
	4.88e-09	1.77e-07	Late Phase of HIV Life Cycle	Reactome	R-HSA-162599	NCBP2; CHMP4A; RPS27A; CTDP1; CHMP2A; NUP37; TAF15; CHMP3; RAN; RNF103-CHMP3; NUP214; RANBP1; RANBP2; NUP155; NUP107; NUP93; RANGAP1; POLR2E; POLR2G; NMT1; POLR2L; POLR2H; TAF7; RCC1; NELFCD; GTF2F2; VTA1; TAF9; NUP210; UBA52; PPIA; UBB; UBC; NUP205	51534; 6879; 9688; 57122; 6880; 9631; 22916; 27243; 5478; 9150; 5903; 100526767; 5905; 23165; 29082; 7311; 51652; 5437; 79023; 5902; 8021; 7314; 1104; 8148; 5901; 51497; 4836; 5434; 5441; 7316; 2963; 23225; 6233; 5436	143	141
	5.64e-09	2.01e-07	Endocytosis - Homo sapiens (human)	KEGG	path:hsa04144	HSPA2; PDGFRA; SNX6; EHD1; SNX4; CHMP4A; HSPA8; EGFR; CHMP2A; DNM1; DNM3; CHMP3; SH3GL1; HSPA1L; EPS15; RAB31; EEA1; CAV2; STAM2; TFRC; RNF103-CHMP3; PML; RAB10; SH3GL2; VTA1; SRC; ARPC2; ACAP1; ARPC5; ARPC4; AP2A1; ARFGEF1; ARFGEF2; AP2A2; CHMP1A; CAPZA1; PARD3; VPS35; VPS36; CAPZB; KIF5A; KIF5B; GIT1; UBB; ARPC1B; ARFGAP2; GBF1; FOLR3	2060; 10254; 9744; 8723; 8729; 100526767; 5156; 6714; 27243; 10890; 10093; 7314; 51652; 160; 161; 58533; 10938; 3798; 8411; 1759; 3305; 3306; 7037; 3312; 5371; 3799; 11031; 28964; 2352; 6455; 6456; 829; 832; 10564; 51534; 51028; 858; 10092; 10095; 10109; 84364; 29082; 10565; 1956; 55737; 26052; 56288; 5119	244	244
	7.09e-09	2.49e-07	TLR JNK	INOH	None	MAP2K1; MAPK9; PSMC3; TOLLIP; PSMB10; PSMD4; TAB1; PSMB4; PSMC1; PSMD10; PSMD13; TMEM189-UBE2V1; MAP2K2; CD14; PSMA1; PSMA7; PSMA5; LY96; UBE2V1; MYD88; PSMC4	5716; 929; 5710; 5682; 5686; 5719; 23643; 4615; 10454; 5702; 5601; 7335; 5700; 5605; 5704; 5699; 54472; 5688; 5604; 5692; 387522	62	62
	9.02e-09	3.12e-07	RMTs methylate histone arginines	Reactome	R-HSA-3214858	CARM1; HIST1H2AM; HIST1H2AL; HIST1H2AI; RPS2; HIST1H2AK; HIST1H2AJ; HIST1H2AE; HIST1H2AD; HIST1H2AG; HIST1H2AA; HIST1H2AC; HIST1H2AB; HIST2H2AA3; HIST2H2AA4; PRMT1; SMARCD3; HIST2H2AB; HIST2H2AC; ACTL6A; ACTL6B; HIST3H2A; HIST1H2AH	51412; 10498; 8337; 723790; 85235; 8332; 221613; 3276; 3013; 8336; 8331; 86; 8335; 6604; 3012; 8330; 6187; 8334; 92815; 317772; 8338; 8969; 8329	74	74
	1.05e-08	3.59e-07	Apoptosis	Reactome	R-HSA-109581	BCL2L1; DYNLL1; PPP3R1; HMGB1; BAX; HIST1H1D; DIABLO; YWHAZ; YWHAQ; YWHAH; STK24; YWHAB; YWHAG; PRKCD; APPL1; PLEC; NMT1; LY96; HIST1H1E; HIST1H1B; HIST1H1C; LMNB1; DBNL; MAGED1; ROCK1; CASP8; VIM; SFN; CD14; KPNA1	929; 3007; 4001; 581; 598; 9500; 7529; 26060; 5580; 841; 7532; 10971; 3006; 2810; 8655; 8428; 5534; 3009; 23643; 3836; 56616; 3146; 7431; 7534; 3008; 6093; 7533; 4836; 5339; 28988	118	118
	1.31e-08	4.4e-07	ErbB1 downstream signaling	PID	erbb1_downstream_pathway	BCL2L1; EGFR; MAP2K2; MAP2K1; IQGAP1; YWHAZ; STAT3; STAT1; YWHAQ; YWHAH; YWHAB; MAPK9; YWHAG; SRC; RAC1; ARPC2; PRKCD; ARPC5; ARPC4; WASF2; PPP5C; ABI1; SFN; GRB2; ARPC1B; PDPK1; ACTR3; RALA	10096; 10109; 1956; 598; 5605; 7529; 5580; 10006; 10092; 6772; 5536; 6714; 10971; 5879; 5601; 2810; 5604; 10095; 7532; 2885; 5170; 8826; 10163; 10093; 7534; 5898; 6774; 7533	107	106
	1.51e-08	4.98e-07	Post-translational protein modification	Reactome	R-HSA-597592	RPN2; DYNLL1; SUMO1; SUMO2; MAN2A1; IKBKG; PMM2; USP24; UBE2V2; TMED10; NAPG; NUP214; CUL5; WDR61; NUP210; HSPA8; TRIM25; P4HB; CTSC; NUP93; SEC24D; CTSZ; EEF2; TRAPPC4; UBA52; UBB; UBC; RBX1; EIF5A2; COPB2; GBF1; NUP205; RHOT1; CAPZB; RPS27A; HSP90B1; ARFGAP2; APOA2; EIF5A; SUMF2; SUMF1; RUVBL1; ADAMTSL4; USP47; RAD21; THBS1; UBXN7; UBXN1; SMC1A; RAB8B; DHPS; RCN1; STAG1; TRRAP; TUBB1; UBA6; DCU…	54165; 56648; 5371; 10890; 23165; 80349; 51035; 1650; 10254; 8883; 8693; 65264; 8332; 5716; 8021; 5476; 84061; 5706; 3093; 5699; 1938; 23243; 5373; 7314; 5954; 54734; 6233; 55611; 8295; 5611; 5686; 8517; 7150; 8335; 8334; 5719; 84364; 10454; 7419; 83871; 10282; 2673; 9363; 7706; 6696; 92815; 7316; 54507; 8451; 55577; 6117; 6185; 81027; 7184; 1075; 135228; 25870; 5688; 3416; 8337; 3956; 23423; 737…	1383	1378
	1.7e-08	5.55e-07	mRNA Processing	Wikipathways	WP411	FUS; NCBP2; SF3B5; PRPF4B; SF3B2; SRSF10; CSTF2; CPSF1; TMED10; PPM1G; SRSF4; SRP54; SRSF2; HNRNPR; SRSF9; SNRPA1; PRPF40A; EFTUD2; SMC1A; SRSF5; PABPN1; NXF1; PRMT1; LSM2; SNRPB2; SNRPD3; SRRM1; CSTF1; RBMX; XRN2; YBX1	6729; 83443; 4904; 8683; 10236; 22916; 5496; 2521; 10972; 6427; 8899; 6429; 10250; 6430; 10992; 29894; 1477; 22803; 3276; 9343; 8106; 6629; 6627; 27316; 8243; 10482; 55660; 6634; 57819; 10772; 1478	127	127
	1.85e-08	5.93e-07	Shigellosis - Homo sapiens (human)	KEGG	path:hsa05131	ARPC5; SRC; CTTN; ACTG1; WASF2; RAC1; CD44; ARPC2; ROCK1; ROCK2; CRKL; PFN1; PFN2; IKBKG; ARPC1B; NFKB1; ACTB; MAPK9; RHOG; ELMO1; ARPC4	9475; 391; 5601; 8517; 5217; 10163; 4790; 6714; 60; 960; 71; 1399; 6093; 5216; 2017; 10092; 10093; 10095; 9844; 5879; 10109	65	65
	1.97e-08	6.23e-07	Programmed Cell Death	Reactome	R-HSA-5357801	BCL2L1; DYNLL1; PPP3R1; HMGB1; BAX; HIST1H1D; DIABLO; YWHAZ; YWHAQ; YWHAH; STK24; YWHAB; YWHAG; PRKCD; APPL1; PLEC; NMT1; LY96; HIST1H1E; HIST1H1B; HIST1H1C; LMNB1; DBNL; MAGED1; ROCK1; CASP8; VIM; SFN; CD14; KPNA1	929; 3007; 4001; 581; 598; 56616; 9500; 7529; 26060; 5580; 841; 7532; 10971; 3006; 2810; 23643; 8655; 8428; 5534; 3009; 3836; 3146; 7431; 7534; 3008; 6093; 7533; 4836; 5339; 28988	121	121
	2.37e-08	7.4e-07	InlB-mediated entry of Listeria monocytogenes into host cell	Reactome	R-HSA-8875360	EPS15; STAM2; RPS27A; MET; UBA52; GRB2; UBB; UBC; SH3GL1; SH3GL2	7316; 10254; 7311; 2060; 6456; 7314; 2885; 6233; 6455; 4233	15	15
	3.11e-08	9.56e-07	Regulation of Actin Cytoskeleton	Wikipathways	WP51	PDGFRA; ACTG1; LIMK1; EGFR; SSH3; MAP2K2; MAP2K1; IQGAP1; WASF2; ARHGEF6; PIK3CD; PIK3R3; PXN; PIP4K2C; GNA13; RAC2; RAC3; CSK; RAC1; ARPC5; CFL2; CFL1; SOS2; ABI2; ROCK1; ROCK2; PFN1; CD14; GNA12; GIT1; PAK4; ACTB; PAK1; PAK3	10298; 79837; 9475; 5829; 1073; 5063; 1956; 6093; 6655; 929; 5605; 5604; 2768; 5879; 8503; 1072; 60; 8826; 10152; 5293; 5156; 10092; 28964; 54961; 5880; 9459; 10672; 10163; 5216; 5881; 5058; 1445; 71; 3984	151	151
	4.63e-08	1.4e-06	Platelet activation, signaling and aggregation	Reactome	R-HSA-76002	APBB1IP; HSPA5; FAM3C; STXBP3; STXBP2; CD63; SERPINE1; YWHAZ; SERPINA3; WDR1; FAM49B; FYN; ABHD12; THBS1; SPARC; PIK3R3; TTN; MANF; LYN; SRC; RAC2; CSK; RAC1; GNB4; PRKCB; GNB1; PRKCD; GNB2; FERMT3; CFL1; TEX264; ALDOA; RHOG; TAGLN2; ORM1; GNAQ; ORM2; CD109; RARRES2; CALU; PFN1; GNA14; GRB2; GNA12; GNA13; PDPK1; MAGED2; PPIA	4067; 10447; 6814; 7873; 2534; 6813; 5005; 1072; 5580; 3309; 5879; 2776; 6714; 5478; 51571; 5054; 51368; 2782; 10672; 6678; 5216; 83706; 12; 5919; 2768; 135228; 8407; 813; 391; 10916; 2885; 59345; 54518; 5579; 8503; 5170; 1445; 9948; 226; 5004; 5880; 26090; 9630; 7534; 7273; 967; 7057; 2783	260	260
	5.46e-08	1.63e-06	Transcriptional regulation by small RNAs	Reactome	R-HSA-5578749	H2AFZ; HIST1H2AK; HIST1H2AJ; HIST1H2AE; HIST1H2AD; HIST1H2AC; HIST1H2AB; RAN; POLR2H; NUP214; HIST2H2AA3; HIST2H2AA4; RANBP2; NUP107; NUP93; POLR2E; POLR2G; HIST1H2BA; POLR2L; HIST2H2AC; H2AFV; NUP210; H2AFX; NUP37; H2AFJ; NUP155; NUP205	255626; 723790; 23225; 8330; 57122; 9631; 3014; 3013; 55766; 5903; 9688; 23165; 8335; 3012; 5437; 79023; 8021; 8338; 5901; 8337; 5434; 5441; 8331; 8334; 3015; 94239; 5436	107	106
	5.62e-08	1.64e-06	TLR p38	INOH	None	PSMC1; PSMC3; TOLLIP; PSMB10; PSMD4; TAB1; PSMB4; MAP2K1; PSMD10; PSMD13; TMEM189-UBE2V1; MAP2K2; CD14; PSMA1; PSMA7; PSMA5; LY96; UBE2V1; MYD88; PSMC4	5716; 929; 5710; 5682; 5686; 5719; 23643; 4615; 10454; 5702; 7335; 5700; 5605; 5704; 5699; 54472; 5688; 5604; 5692; 387522	63	63
	5.62e-08	1.64e-06	Influenza Infection	Reactome	R-HSA-168254	PABPN1; NUP155; GTF2F2; RAN; CALR; EIF2AK2; NUP93; POLR2G; NUP37; POLR2E; NUP107; KPNA3; KPNA1; HSP90AA1; NUP214; POLR2L; NUP210; POLR2H; NUP205; RANBP2	5901; 9688; 23165; 5437; 5434; 5441; 3320; 5610; 3836; 5903; 23225; 2963; 3839; 811; 57122; 8021; 79023; 9631; 8106; 5436	63	63
	1.01e-07	2.91e-06	Interferon Signaling	Reactome	R-HSA-913531	TRIM38; SUMO1; MX2; MX1; FCGR1B; IFIT3; CD44; PPM1B; STAT1; EIF4A2; ICAM1; GBP2; PML; HLA-DPB1; IFITM1; CAMK2D; TRIM25; GBP1; IFI35; CAMK2A; PRKCD; UBA7; VCAM1; EIF4E; SAMHD1; IRF5; EIF4G2; EIF4G1; EIF2AK2; ISG20; ABCE1; EIF4A1; EIF4A3; SP100	10475; 7412; 1982; 5495; 5371; 817; 6059; 3669; 815; 5580; 8519; 4599; 3663; 6772; 3430; 4600; 6672; 1981; 2210; 7318; 7706; 25939; 1977; 9775; 3383; 2634; 1974; 7341; 5610; 2633; 1973; 960; 3115; 3437	158	158
	1.12e-07	3.18e-06	CD4 T cell receptor signaling	INOH	None	PPP3R1; PSMB10; PSMD4; MAP2K2; MAP2K1; IKBKG; PSMA1; FYN; PIK3CD; GRB2; PSMA7; PSMA5; PSMC1; MAPK9; PSMC4; HLA-DPB1; RAC2; RAC3; RAC1; PPP3CA; UBE2V1; PSMC3; SOS2; NFKB1; TAB1; PSMD10; PSMD13; TMEM189-UBE2V1; PDPK1; PSMB4	5702; 2534; 2885; 5605; 5704; 4790; 5879; 5601; 5700; 6655; 5604; 5692; 387522; 5716; 5881; 5534; 5686; 5710; 8517; 5170; 5688; 5530; 5682; 5719; 5293; 5880; 10454; 7335; 3115; 5699	130	130
	1.54e-07	4.31e-06	Pathogenic Escherichia coli infection - Homo sapiens (human)	KEGG	path:hsa05130	YWHAZ; CTTN; ROCK1; ACTG1; ARPC1B; YWHAQ; FYN; TUBB; ROCK2; ARPC4; CD14; TUBAL3; NCL; ARPC5; ARPC2; LY96; ACTB; TUBB1	81027; 10093; 929; 10971; 9475; 203068; 71; 60; 6093; 4691; 23643; 2017; 2534; 10092; 10095; 79861; 7534; 10109	55	55
	1.92e-07	5.25e-06	ISG15 antiviral mechanism	Reactome	R-HSA-1169408	PPM1B; STAT1; TRIM25; EIF4G1; EIF2AK2; MX2; MX1; UBA7; EIF4G2; EIF4E; EIF4A1; EIF4A3; EIF4A2	7706; 1974; 6772; 4600; 1982; 5610; 5495; 1973; 1977; 1981; 9775; 4599; 7318	30	30
	1.92e-07	5.25e-06	Antiviral mechanism by IFN-stimulated genes	Reactome	R-HSA-1169410	PPM1B; STAT1; TRIM25; EIF4G1; EIF2AK2; MX2; MX1; UBA7; EIF4G2; EIF4E; EIF4A1; EIF4A3; EIF4A2	7706; 1974; 6772; 4600; 1982; 5610; 5495; 1973; 1977; 1981; 9775; 4599; 7318	30	30
	2.01e-07	5.44e-06	Salmonella infection - Homo sapiens (human)	KEGG	path:hsa05132	ACTG1; WASF2; PFN2; NFKB1; MAPK9; RAC1; ARPC2; ARPC5; ARPC4; DYNC1LI2; PYCARD; RHOG; IL18; MYD88; CASP1; ARPC1B; ROCK1; ROCK2; PFN1; CD14; KLC1; ACTB; KLC4	4615; 3606; 60; 71; 5216; 5217; 4790; 1783; 9475; 834; 5601; 89953; 10092; 10093; 10095; 10109; 391; 929; 5879; 10163; 29108; 3831; 6093	86	86
	2.09e-07	5.52e-06	Thromboxane A2 receptor signaling	PID	txa2pathway	SRC; GNAQ; RAC1; GNB1; EGFR; PRKCB; FYN; ROCK1; PRKCD; GNA14; DNM1; VCAM1; ICAM1; HCK; LYN; GNA12; YES1; GNA13	4067; 9630; 7412; 3055; 6714; 2534; 1956; 1759; 5879; 6093; 2776; 2782; 7525; 10672; 5580; 2768; 5579; 3383	57	56
	2.09e-07	5.52e-06	Pathogenic Escherichia coli infection	Wikipathways	WP2272	YWHAZ; CTTN; ROCK1; ACTG1; ARPC2; YWHAQ; FYN; TUBB; ROCK2; TUBB1; CD14; TUBAL3; NCL; ARPC5; ARPC1B; LY96; ACTB; ARPC4	9475; 60; 10109; 4691; 203068; 7534; 2017; 81027; 10093; 10971; 23643; 79861; 71; 6093; 10092; 10095; 929; 2534	56	56
	2.13e-07	5.55e-06	ESR-mediated signaling	Reactome	R-HSA-8939211	HDAC1; CARM1; FKBP5; HIST1H2AK; HIST1H2AJ; HIST1H2AE; HIST1H2AD; HIST1H2AC; HIST1H2AB; POLR2H; HSP90AB1; CBFB; HIST2H2AA3; HIST2H2AA4; SMC1A; STAG1; ERBB4; RAD21; PRMT1; POLR2E; POLR2G; HIST1H2BA; POLR2L; HIST2H2AC; H2AFV; GTF2F2; PPP5C; H2AFX; H2AFZ; HSP90AA1; PPID; H2AFJ	255626; 3065; 8330; 5481; 3326; 3014; 5885; 5536; 3013; 55766; 10498; 723790; 8335; 865; 3012; 5437; 10274; 3276; 8338; 8337; 5434; 5441; 3320; 8331; 2963; 8334; 3015; 2066; 94239; 2289; 5436; 8243	150	148
	2.26e-07	5.82e-06	IL-1 JNK	INOH	None	PSMC1; MYD88; TOLLIP; PSMB10; PSMD4; TAB1; PSMB4; PSMD10; PSMD13; TMEM189-UBE2V1; MAP2K2; MAP2K1; PSMA1; PSMA7; PSMA5; UBE2V1; MAPK9; PSMC4; PSMC3	5716; 5710; 5682; 5686; 5719; 5604; 54472; 5601; 4615; 10454; 5702; 7335; 5700; 5605; 5704; 5699; 5688; 5692; 387522	62	62
	2.53e-07	6.45e-06	Validated targets of C-MYC transcriptional activation	PID	myc_activpathway	NME1-NME2; BAX; MTDH; EIF2S1; CAD; RUVBL1; RUVBL2; HSPD1; TFRC; NBN; TRRAP; RPL11; EIF4E; RCC1; NME1; NME2; EIF4G1; PTMA; TAF9; NCL; ACTL6A; HSP90AA1; EIF4A1	92140; 4691; 581; 4831; 86; 6880; 8607; 790; 7037; 1965; 1981; 3329; 4830; 4683; 8295; 5757; 1977; 654364; 1104; 3320; 6135; 1973; 10856	87	87
	2.75e-07	6.94e-06	Regulation of HSF1-mediated heat shock response	Reactome	R-HSA-3371453	HSPA2; HSPA5; HSPA8; ST13; HSPA1L; HSPH1; DNAJB1; NUP107; NUP214; NUP37; NUP210; RANBP2; UBB; HSPB1; NUP93; HSPA14; RPA1; DNAJC2; RPA2; NUP155; SERPINH1; NUP205	9688; 23165; 6118; 27000; 3306; 5903; 871; 6117; 7314; 23225; 51182; 57122; 3305; 8021; 79023; 3315; 3309; 10808; 9631; 3312; 3337; 6767	81	81
	3.01e-07	7.5e-06	TLR NFkB	INOH	None	PSMC1; PSMC3; TOLLIP; PSMB10; PSMD4; TAB1; PSMB4; PSMD10; PSMD13; TMEM189-UBE2V1; CD14; PSMA1; IKBKG; PSMA5; LY96; NFKB1; MYD88; PSMC4; UBE2V1; PSMA7	5716; 929; 5710; 5682; 4790; 5719; 23643; 5686; 4615; 8517; 10454; 5702; 7335; 5700; 5704; 5699; 54472; 5688; 5692; 387522	69	69
	3.35e-07	8.24e-06	TCR	NetPath	Pathway_TCR	ITSN2; ACTA1; CRKL; PRPF4B; MAP2K2; MAP2K1; PIK3AP1; YWHAZ; UBASH3B; DEF6; STAT1; MPZL1; ARHGEF6; STAM2; YWHAQ; FYN; HSP90AB1; TFRC; ARHGDIB; PXN; NFKB1; LYN; MAPK9; SRC; ANXA2; WDR1; TRIM25; PRKCD; STK4; STK39; DDX49; PARD3; DBNL; SOS2; TUBB; PAK1; RAN; GRB2; NCL; ATP1A1; ACLY; AHCY; DNAJB1; ELMO1	4067; 118788; 4691; 6772; 397; 1399; 8899; 5605; 56288; 10254; 5580; 3326; 50619; 476; 4790; 7037; 58; 3337; 10971; 203068; 5601; 6655; 5604; 6789; 2534; 5058; 302; 7706; 9019; 191; 50618; 47; 9459; 2885; 84959; 28988; 27347; 54555; 5901; 9948; 5829; 7534; 6714; 9844	245	244
	3.94e-07	9.49e-06	Proteasome Degradation	Wikipathways	WP183	RPN2; PSMB4; PSMB10; PSMD4; UBC; H2AFX; PSMD10; PSMD13; UBA7; PSMA1; PSMA7; UBB; PSMA5; PSMC1; PSMC3; PSMC4; H2AFZ; PSMC6; HIST1H2AB	5710; 5704; 5706; 5700; 5702; 6185; 5688; 5686; 5682; 8335; 7318; 5719; 5716; 7316; 3014; 3015; 5692; 5699; 7314	64	64
	3.95e-07	9.49e-06	Cell Cycle	Reactome	R-HSA-1640170	HDAC1; SMC1A; DYNLL1; TUBB; AHCTF1; DHFR; RPA1; RPS27A; RFC2; FEN1; NUP37; HIST1H2AK; HIST1H2AJ; HIST1H2AE; HIST1H2AD; KIF2A; LEMD2; HIST1H2AC; HIST1H2AB; YWHAZ; TUBG1; SET; RUVBL1; RUVBL2; MAD1L1; YWHAQ; ZW10; SMC4; HIST2H2AC; HSP90AB1; ARPP19; YWHAH; RFC4; NBN; SUMO1; GORASP2; YWHAB; LYN; HIST2H2AA3; HIST2H2AA4; YWHAG; RANBP2; PCNA; SRC; STAG1; NUP155; BUB3; NUP107; CENPF; PRKCB; NUP93; CDK11A;…	6118; 27175; 57122; 728642; 3014; 6714; 7529; 23165; 8338; 1459; 23225; 8331; 7316; 7533; 10856; 3065; 723790; 1063; 6117; 1460; 3326; 8607; 10971; 3013; 2810; 4683; 984; 7311; 5579; 8379; 8337; 8335; 3320; 7283; 10776; 8334; 3015; 94239; 1719; 221496; 4001; 25909; 5982; 8021; 255626; 64151; 3796; 5903; 55766; 7336; 1783; 6418; 8655; 9688; 10142; 5905; 9183; 10051; 10274; 9184; 7314; 7341; 5111; …	564	563
	3.98e-07	9.49e-06	Golgi-to-ER retrograde transport	Reactome	R-HSA-8856688	CAPZB; DYNLL1; ARFGAP2; KIF2A; DCTN4; TMED10; COPZ1; TMED3; COPE; TMED9; NAPG; NBAS; RAB3GAP1; DYNC1LI2; KIF21A; ZW10; BNIP1; PAFAH1B3; CAPZA1; KIF1B; GBF1; KIF5B; AGPAT3; KIF5A; KLC1; COPB2; KLC4	8774; 56894; 55605; 832; 22818; 54732; 22930; 3831; 23095; 3796; 51164; 1783; 9276; 662; 8655; 3799; 5050; 8729; 9183; 89953; 23423; 51594; 829; 10972; 84364; 3798; 11316	116	116
	4.38e-07	1.03e-05	Telomere Maintenance	Reactome	R-HSA-157579	H2AFX; RFC2; FEN1; HIST1H2AK; HIST1H2AJ; HIST1H2AE; HIST1H2AD; HIST1H2AC; HIST1H2AB; RUVBL1; RUVBL2; RFC4; HIST2H2AA3; HIST2H2AA4; PCNA; HIST1H2BA; HIST2H2AC; H2AFV; RPA1; H2AFZ; RPA2; H2AFJ	255626; 3014; 8607; 8337; 723790; 6118; 3013; 8331; 55766; 5111; 8335; 3012; 5982; 6117; 8330; 2237; 8334; 5984; 3015; 8338; 94239; 10856	84	83
	4.71e-07	1.1e-05	Influenza Life Cycle	Reactome	R-HSA-168255	NUP155; GTF2F2; RAN; CALR; NUP107; NUP93; NUP37; POLR2E; POLR2G; KPNA1; HSP90AA1; NUP214; POLR2L; NUP210; POLR2H; NUP205; RANBP2	5901; 9688; 23165; 5437; 5434; 5441; 3320; 3836; 5903; 23225; 2963; 811; 57122; 8021; 79023; 9631; 5436	53	53
	5.02e-07	1.16e-05	Protein export - Homo sapiens (human)	KEGG	path:hsa03060	SEC11A; SRP54; SRPRB; SPCS1; SPCS2; SEC63; SRP68; SEC61G; HSPA5; SRP72; SEC61B	3309; 28972; 10952; 23478; 23480; 9789; 6729; 6730; 6731; 11231; 58477	23	23
	5.4e-07	1.23e-05	Listeria monocytogenes entry into host cells	Reactome	R-HSA-8876384	EPS15; STAM2; RPS27A; MET; UBA52; GRB2; UBB; UBC; SH3GL1; SH3GL2	7316; 7311; 2060; 6456; 10254; 7314; 2885; 6233; 6455; 4233	19	19
	5.51e-07	1.25e-05	miR-targeted genes in leukocytes - TarBase	Wikipathways	WP2003	ATP6V1F; SNX6; ACP2; SRSF10; ADPGK; TMED10; RAB34; TMED3; ATP2A2; DNAJB1; YWHAQ; TPM3; PRPF40A; THBS1; GAK; ARHGDIA; CDCP1; PDLIM5; ANXA2; IDH1; CTSC; CA12; TMEM109; CAPG; RHOG; NELFCD; SH3BGRL3; TBCA; TNFAIP2; GNA13; PPIB; TMEM43	10611; 3417; 7127; 5479; 83442; 1075; 7057; 58533; 64866; 3337; 53; 83440; 391; 6902; 10972; 55660; 302; 822; 83871; 79188; 2580; 79073; 396; 10672; 7170; 23423; 51497; 771; 10971; 488; 9296; 10772	154	154
	6.01e-07	1.35e-05	insulin	INOH	None	RPTOR; YWHAZ; SOS2; PRKAB1; GRB2; EIF4G1; YWHAQ; PIK3CD; MAP2K1; SFN; MAP2K2; YWHAH; GYS2; FKBP1A; EIF4E; PDPK1; YWHAB; RHEB; EIF4A1; YWHAG; EIF4A2	5564; 1981; 7532; 6009; 1973; 2998; 5293; 2885; 57521; 1974; 7534; 1977; 5605; 5170; 7529; 2810; 7533; 5604; 10971; 2280; 6655	78	78
	6.12e-07	1.35e-05	Cytokine Signaling in Immune system	Reactome	R-HSA-1280215	TRIM38; CRKL; SUMO1; PIK3CD; HMGB1; RPS27A; MX2; IL5RA; MX1; MAP2K1; STXBP2; FCGR1B; UBE2V1; IFIT3; FLT3; YES1; YWHAZ; STAT3; PPM1B; STAT1; MAPKAPK3; FYN; EIF4A2; TMEM189-UBE2V1; PIK3R3; ICAM1; TRIM25; PML; NFKB1; LYN; MAPK9; GBP1; HLA-DPB1; IFITM1; CAMK2D; CD44; P4HB; IFI35; IKBKG; CAMK2A; TXLNA; PRKCD; UBA7; VCAM1; EIF4E; HCK; IL18; MYD88; SAMHD1; IRF5; TOLLIP; CASP1; EIF4G2; EIF4G1; EIF2AK2; I…	5495; 5371; 6059; 815; 8519; 1982; 6672; 834; 5034; 387522; 7706; 2885; 3603; 8503; 7867; 3146; 7316; 960; 54472; 3437; 5293; 2534; 2633; 6772; 3055; 5601; 1981; 7525; 7318; 7311; 3606; 4599; 7335; 6774; 5580; 3663; 200081; 4790; 3430; 4600; 4615; 817; 2322; 5604; 25939; 1977; 7314; 1399; 3383; 3568; 1974; 7341; 6233; 4067; 10475; 7412; 6813; 5610; 3669; 2210; 9978; 8517; 9775; 2634; 10454; 7534;…	458	458
	6.15e-07	1.35e-05	Signaling by Nuclear Receptors	Reactome	R-HSA-9006931	HDAC1; SMC1A; CARM1; FKBP5; HIST1H2AK; HIST1H2AJ; HIST1H2AE; HIST1H2AD; HIST1H2AC; HIST1H2AB; PDHX; DHRS4; HIST2H2AC; HSP90AB1; CBFB; HIST2H2AA3; HIST2H2AA4; CPT1A; PRMT1; ERBB4; RAD21; STAG1; POLR2E; POLR2G; HIST1H2BA; POLR2L; POLR2H; H2AFV; GTF2F2; PPP5C; H2AFX; H2AFZ; PDK1; DHRS4L1; HSP90AA1; PPID; H2AFJ	255626; 728635; 723790; 1374; 8330; 3065; 5481; 3326; 3014; 8338; 5885; 3013; 55766; 10498; 5163; 10901; 8335; 865; 8050; 3012; 5437; 10274; 3276; 8337; 5434; 3320; 5536; 8331; 2963; 8334; 5441; 3015; 2066; 94239; 2289; 5436; 8243	195	193
	6.51e-07	1.41e-05	Gene Silencing by RNA	Reactome	R-HSA-211000	H2AFZ; HIST1H2AK; HIST1H2AJ; HIST1H2AE; HIST1H2AD; HIST1H2AC; HIST1H2AB; RAN; POLR2H; NUP214; HIST2H2AA3; HIST2H2AA4; RANBP2; TSNAX; NUP107; NUP93; POLR2E; POLR2G; HIST1H2BA; POLR2L; HIST2H2AC; H2AFV; NUP210; H2AFX; NUP37; DDX4; H2AFJ; NUP155; NUP205	255626; 723790; 23225; 8330; 57122; 9631; 3014; 3013; 55766; 5903; 9688; 23165; 8335; 3012; 5437; 79023; 8021; 8338; 5901; 8337; 5434; 5441; 8331; 54514; 8334; 3015; 7257; 94239; 5436	134	133
	6.68e-07	1.44e-05	IL-1 p38	INOH	None	PSMC1; MYD88; TOLLIP; PSMB10; PSMD4; TAB1; PSMB4; PSMD10; PSMD13; TMEM189-UBE2V1; MAP2K2; MAP2K1; PSMA1; PSMA7; PSMA5; UBE2V1; MAPK9; PSMC4; PSMC3	5716; 5710; 5682; 5686; 5719; 54472; 5601; 4615; 10454; 5702; 7335; 5700; 5605; 5704; 5699; 5688; 5604; 5692; 387522	66	66
	6.76e-07	1.44e-05	Metabolism of nucleotides	Reactome	R-HSA-15869	ADSS; NME1-NME2; CAD; CTPS2; DPYD; NT5C; IMPDH1; IMPDH2; NUDT1; NUDT5; NUDT16; GLRX; GMPS; SAMHD1; NME1; NME2; NME3; AK2; TAF9; AK4; GPX1; TYMP; PPAT; DTYMK; DCK	4831; 4832; 1806; 2745; 6880; 790; 56474; 3614; 1841; 205; 4830; 30833; 25939; 1890; 4521; 654364; 8833; 204; 159; 131870; 1633; 5471; 11164; 3615; 2876	105	105
	6.92e-07	1.46e-05	cycling of ran in nucleocytoplasmic transport	BioCarta	ranpathway	RCC1; RAN; NUP210; RANGAP1; NUP214; RANBP1; RANBP2	5902; 8021; 5903; 5901; 23225; 1104; 5905	9	9
	8.23e-07	1.72e-05	Cell Cycle, Mitotic	Reactome	R-HSA-69278	HDAC1; SMC1A; DYNLL1; AHCTF1; DHFR; H2AFX; RPS27A; RFC2; FEN1; NUP37; HIST1H2AK; HIST1H2AJ; HIST1H2AE; HIST1H2AD; KIF2A; LEMD2; HIST1H2AC; HIST1H2AB; CDKN2C; SET; MAD1L1; RAD21; SMC4; HIST2H2AC; HSP90AB1; ARPP19; PPME1; RFC4; TUBB; GORASP2; NUP214; LYN; HIST2H2AA3; HIST2H2AA4; YWHAG; RANBP2; PCNA; SRC; STAG1; NUP155; BUB3; NUP107; CENPF; PRKCB; NUP93; CDK11A; CDK11B; RANGAP1; HIST1H2BA; DYNC1LI2;…	6118; 27175; 57122; 728642; 3014; 6714; 10051; 23165; 9978; 8338; 1459; 8331; 7316; 723790; 1063; 6117; 1460; 3326; 3013; 3796; 984; 7311; 5579; 8379; 8337; 3320; 7283; 10776; 8334; 3015; 94239; 1719; 221496; 4001; 25909; 23225; 5982; 8021; 255626; 3065; 64151; 5903; 55766; 1783; 6418; 8655; 9688; 10142; 5905; 9183; 10274; 9184; 7314; 5111; 26003; 51400; 6233; 4067; 8330; 9631; 7532; 5885; 1031; …	481	480
	8.59e-07	1.78e-05	Cytosolic tRNA aminoacylation	Reactome	R-HSA-379716	LARS; KARS; IARS; VARS; AARS; WARS; AIMP1; RARS; YARS; SARS; GARS	8565; 9255; 5917; 7407; 16; 51520; 7453; 2617; 3376; 3735; 6301	24	24
	9.21e-07	1.89e-05	Human immunodeficiency virus 1 infection - Homo sapiens (human)	KEGG	path:hsa05170	BCL2L1; TAP1; PPP3CA; CRKL; LIMK1; BAX; MAP2K2; MAP2K1; IKBKG; PPP3R1; TBK1; PIK3CD; PIK3R3; PXN; GNB4; NFKB1; MYD88; RAC2; RAC3; RAC1; PDIA3; PRKCB; GNB1; GNB2; CFL2; CFL1; CUL5; MAPK9; SAMHD1; GNAQ; CALML3; TAB1; CASP8; PAK1; CUL4A; PAK4; RBX1; CALR; PAK3	4615; 581; 1072; 1073; 10298; 598; 5293; 4790; 5829; 10454; 2782; 2783; 6890; 5879; 5880; 5881; 9978; 8451; 2776; 810; 811; 8503; 8517; 841; 25939; 2923; 1399; 8065; 3984; 5530; 5534; 29110; 5058; 5063; 5579; 59345; 5601; 5604; 5605	212	212
	9.74e-07	1.98e-05	Translesion synthesis by REV1	Reactome	R-HSA-110312	PCNA; RFC4; RPS27A; RPA1; RPA2; UBA52; UBB; UBC; RFC2	7316; 5984; 7311; 6118; 7314; 6233; 5982; 6117; 5111	16	16
	1.02e-06	2.06e-05	M Phase	Reactome	R-HSA-68886	DYNLL1; AHCTF1; GORASP2; RPS27A; TUBB; H2AFZ; HIST1H2AK; HIST1H2AJ; HIST1H2AE; HIST1H2AD; KIF2A; LEMD2; HIST1H2AC; HIST1H2AB; SET; MAD1L1; RAD21; SMC4; CSNK2A2; ARPP19; NUP214; HIST2H2AA3; NUP210; YWHAG; RANBP2; SMC1A; PRKCB; UBB; BUB3; NUP107; CENPF; STAG1; NUP93; RANGAP1; HIST1H2BA; DYNC1LI2; ZW10; HIST2H2AC; H2AFV; LMNB1; HIST2H2AA4; H2AFX; AKAP9; NUP37; TUBG1; UBA52; TUBG2; NUP205; NUP155; UB…	221496; 8330; 4001; 723790; 10274; 25909; 27175; 8021; 255626; 64151; 57122; 1460; 9631; 3014; 7314; 5885; 5579; 5903; 23225; 3013; 55766; 1783; 10051; 79023; 6418; 8243; 8655; 9688; 10142; 5905; 23165; 1063; 9183; 8379; 8335; 3012; 9184; 3796; 8338; 1459; 8337; 7532; 7311; 3320; 7283; 8331; 94239; 7316; 10776; 26003; 8334; 3015; 6233; 203068	340	339
	1.04e-06	2.06e-05	Bacterial invasion of epithelial cells - Homo sapiens (human)	KEGG	path:hsa05100	ARPC5; SRC; CTTN; ACTG1; WASF2; RAC1; ARPC2; PIK3CD; CAV2; CRKL; MET; PIK3R3; PXN; DNM3; ARPC1B; DNM1; ACTB; ARPC4; RHOG; ELMO1	391; 4233; 10109; 5293; 10163; 8503; 9844; 6714; 60; 26052; 5829; 71; 1399; 858; 1759; 2017; 10092; 10093; 10095; 5879	74	74
	1.04e-06	2.06e-05	Regulation of actin cytoskeleton - Homo sapiens (human)	KEGG	path:hsa04810	PDGFRA; ACTG1; CRKL; ITGA3; EGFR; MAP2K2; MAP2K1; IQGAP1; WASF2; ARHGEF6; PIK3CD; PIK3R3; PXN; PIP4K2C; GNA13; SRC; LIMK1; RAC2; RAC3; RAC1; ARPC2; ARPC5; ARPC4; CFL2; CFL1; SOS2; ABI2; ARPC1B; ROCK1; ROCK2; PFN1; PFN2; GNA12; GIT1; PAK4; ACTB; PAK3; PAK1; SSH3	5217; 10298; 5156; 1072; 1073; 6714; 60; 5216; 3675; 8826; 5293; 54961; 2768; 10109; 5879; 5880; 5881; 9475; 5829; 28964; 8503; 10163; 10092; 10093; 10095; 1399; 3984; 1956; 10152; 71; 10672; 9459; 5058; 6093; 79837; 5604; 5605; 5063; 6655	213	213
	1.37e-06	2.69e-05	RHO GTPases activate PKNs	Reactome	R-HSA-5625740	HIST1H2AK; HIST1H2AJ; HIST1H2AE; HIST1H2AD; HIST1H2AC; HIST1H2AB; YWHAZ; YWHAQ; YWHAH; YWHAB; HIST2H2AA3; HIST2H2AA4; YWHAG; RAC1; HIST1H2BA; HIST2H2AC; H2AFV; H2AFX; H2AFZ; SFN; PDPK1; PAK1; H2AFJ	255626; 723790; 8330; 7529; 7532; 3014; 10971; 3013; 55766; 5879; 2810; 5058; 8335; 3012; 8338; 5170; 8337; 8331; 7534; 8334; 7533; 3015; 94239	96	95
	1.43e-06	2.78e-05	Signaling by Receptor Tyrosine Kinases	Reactome	R-HSA-9006934	PDGFRA; ATP6V1F; NCBP2; ATP6AP1; ITGA3; EGFR; DNM1; DNM3; MAPKAPK3; YES1; SH3GL2; EPS15; POLR2H; STAT3; CRKL; STAT1; SH3GL1; STAM2; FYN; THBS3; THBS1; PDPK1; PIK3R3; PXN; YWHAB; CUL5; ATP6V0D1; ERBB2; SRC; RPS27A; ELMO1; CSK; RAC1; PRKCB; PRKCD; POLR2E; POLR2G; AP2A1; AP2A2; POLR2L; LYN; HSP90AA1; WASF2; GTF2F2; ABI2; AHCYL1; ABI1; ROCK1; ROCK2; KIT; ERBB4; MET; UBA52; GRB2; SPP1; CDK5; UBB; UBC;…	8065; 10006; 528; 161; 2885; 6696; 26052; 8503; 7867; 5829; 7316; 6093; 245973; 5156; 2534; 7529; 10254; 6456; 7057; 6772; 4233; 5058; 7311; 10163; 9296; 5579; 9114; 3320; 10152; 2963; 6774; 6714; 5063; 5436; 1759; 1020; 5580; 22916; 5879; 3675; 7314; 160; 5441; 6233; 4067; 9475; 1956; 1399; 6455; 2060; 3815; 9844; 2064; 7525; 10768; 537; 5437; 5170; 1445; 7059; 5434; 5898; 2066	423	423
	1.47e-06	2.82e-05	insulin Mam	INOH	None	YWHAZ; RPTOR; SOS2; PRKAB1; GRB2; EIF4G1; YWHAQ; PIK3CD; MAP2K1; SFN; MAP2K2; YWHAH; GYS2; FKBP1A; EIF4E; PDPK1; YWHAB; RHEB; EIF4A1; YWHAG; EIF4A2	1981; 7532; 7534; 6009; 2998; 5170; 1973; 5293; 1974; 2885; 57521; 1977; 5605; 6655; 7529; 2810; 7533; 5604; 10971; 5564; 2280	82	82
	1.47e-06	2.82e-05	Transport of Mature Transcript to Cytoplasm	Reactome	R-HSA-72202	SRSF5; SRSF4; NUP37; NXF1; NCBP2; NUP107; SRRM1; NUP93; SRSF2; SRSF9; ALYREF; CPSF1; POLDIP3; NUP205; NUP155; NUP214; THOC2; EIF4E; NUP210; EIF4A3; RANBP2	57187; 10250; 9688; 22916; 9775; 8683; 23165; 9631; 6429; 29894; 5903; 10189; 10482; 23225; 57122; 84271; 8021; 79023; 6430; 1977; 6427	82	82
	1.59e-06	3.02e-05	Pancreatic adenocarcinoma pathway	Wikipathways	WP4263	BCL2L1; EGFR; BAX; MAP2K2; MAP2K1; IKBKG; STAT3; STAT1; ARHGEF6; PIK3CD; PIK3R3; NFKB1; MAPK9; ERBB2; RAC2; RAC3; RAC1; PRKCD; PAK4; PAK1; RALA; PAK3	10298; 5063; 1956; 2064; 598; 5605; 5604; 5601; 8517; 581; 6774; 6772; 8503; 5580; 5898; 9459; 5293; 5881; 5880; 5058; 4790; 5879	89	89
	1.77e-06	3.33e-05	Negative regulation of MET activity	Reactome	R-HSA-6807004	EPS15; STAM2; RPS27A; MET; UBA52; GRB2; UBB; UBC; SH3GL1; SH3GL2	7316; 10254; 7311; 2060; 6456; 7314; 6233; 2885; 6455; 4233	21	21
	1.91e-06	3.5e-05	IL-1 NFkB	INOH	None	PSMC1; PSMC3; TOLLIP; PSMB10; PSMD4; TAB1; PSMB4; PSMD10; PSMD13; TMEM189-UBE2V1; PSMA1; IKBKG; PSMA5; NFKB1; MYD88; PSMC4; UBE2V1; PSMA7	5716; 5710; 5682; 4790; 5719; 54472; 5686; 4615; 8517; 10454; 5702; 7335; 5700; 5704; 5699; 5688; 5692; 387522	64	64
	1.92e-06	3.5e-05	Translesion synthesis by POLK	Reactome	R-HSA-5655862	PCNA; RFC4; RPS27A; RPA1; RPA2; UBA52; UBB; UBC; RFC2	7316; 5984; 7311; 6118; 7314; 6233; 5982; 6117; 5111	17	17
	1.92e-06	3.5e-05	Translesion synthesis by POLI	Reactome	R-HSA-5656121	PCNA; RFC4; RPS27A; RPA1; RPA2; UBA52; UBB; UBC; RFC2	7316; 5984; 7311; 6118; 7314; 6233; 5982; 6117; 5111	17	17
	1.93e-06	3.5e-05	Intra-Golgi and retrograde Golgi-to-ER traffic	Reactome	R-HSA-6811442	CAPZB; DYNLL1; RAB39A; ARL1; ARFGAP2; KIF2A; PLIN3; DCTN4; TMED10; COPZ1; TMED3; COPE; TMED9; NAPG; NBAS; KIF21A; RAB3GAP1; MAN2A1; YKT6; DYNC1LI2; ZW10; BNIP1; PAFAH1B3; CAPZA1; NAA38; KIF1B; KLC4; KIF5B; SNAP29; AGPAT3; KIF5A; VPS53; KLC1; COPB2; GBF1	8774; 56894; 22818; 55605; 832; 54732; 22930; 1783; 23095; 3796; 51164; 3831; 10226; 5050; 9342; 9276; 662; 8655; 84316; 55275; 3799; 8729; 400; 9183; 89953; 23423; 51594; 4124; 829; 10972; 84364; 3798; 54734; 10652; 11316	186	186
	2.3e-06	4.14e-05	Metabolism of amino acids and derivatives	Reactome	R-HSA-71291	KARS; RPS11; RPS10; RPS17; RPS16; RPS14; RPLP2; RPL4; RPS18; RPL35A; AIMP1; RPS7; RPS25; RPS27A; RPS2; BCKDK; PYCR2; TST; FAU; PYCR1; PDHX; ADI1; PAPSS2; RPL27; MPST; RPL23; RPL22; RARS; ETHE1; IL4I1; RPS19; LARS; RPS24; IARS; RPS20; RPS28; KYNU; RPL11; RPL12; RPS4Y2; ALDH18A1; MCCC1; RPS12; RPL26L1; RPSA; RPL38; RPL36; GLUD2; RPL30; UBA52; SARS; AHCY; CPS1	6155; 3735; 6229; 7263; 6201; 191; 2197; 6156; 6208; 9060; 5831; 6135; 6146; 56922; 6124; 259307; 8942; 9255; 29920; 6136; 6204; 25873; 6222; 7311; 3376; 6234; 6187; 5832; 23474; 6206; 6301; 1373; 10295; 6181; 6169; 51121; 2747; 6218; 3921; 5917; 6233; 6230; 51520; 6205; 4357; 6223; 9349; 55256; 8050; 6224; 140032; 6165; 6217	342	339
	2.34e-06	4.18e-05	HSF1-dependent transactivation	Reactome	R-HSA-3371571	RPTOR; HSPA2; HSPH1; HSPB1; CAMK2D; DNAJB1; HSPA8; CAMK2A; HSP90AB1; UBB; HSP90AA1; SERPINH1; HSPA1L	3312; 7314; 3320; 3315; 3306; 817; 57521; 871; 3305; 815; 10808; 3326; 3337	36	36
	3.01e-06	5.34e-05	Purine metabolism	EHMN	Purine metabolism	ATP2A1; ATP2A2; ATP2A3; NME1-NME2; POLG; DNM1; NUP37; SLC25A19; ATP1A2; DCK; XPO7; NT5C; COPE; PRDX6; NUP214; NUP210; RANBP2; NUP155; NUP107; NUP93; ATP12A; POLR2E; POLR2G; POLR2L; ATP2B3; POLR2H; ATP4A; NME1; NME2; AK2; TAF9; AK4; KPNA6; TYMP; ATP1A4; NUP205; ATP1A1; COPB2; TUFM	492; 5437; 1759; 23225; 480; 6880; 9631; 30833; 488; 476; 60386; 7284; 495; 205; 5903; 4830; 23039; 23633; 5428; 79023; 9276; 9688; 23165; 1890; 479; 4831; 57122; 654364; 8021; 487; 9588; 5434; 5441; 1633; 204; 489; 11316; 5436; 477	223	222
	3.1e-06	5.46e-05	Mitotic Prophase	Reactome	R-HSA-68875	GORASP2; H2AFZ; HIST1H2AK; HIST1H2AJ; HIST1H2AE; HIST1H2AD; LEMD2; HIST1H2AC; HIST1H2AB; SET; SMC4; ARPP19; NUP214; HIST2H2AA3; HIST2H2AA4; RANBP2; NUP107; PRKCB; NUP93; HIST1H2BA; HIST2H2AC; H2AFV; LMNB1; NUP210; H2AFX; NUP37; H2AFJ; NUP155; NUP205	255626; 4001; 723790; 23225; 8330; 57122; 9631; 221496; 3014; 3013; 55766; 5903; 79023; 6418; 9688; 23165; 8335; 10051; 3012; 8021; 8338; 5579; 8337; 8331; 94239; 10776; 26003; 8334; 3015	144	143
	3.33e-06	5.79e-05	RAC1 signaling pathway	PID	rac1_pathway	ABI1; STAT3; WASF2; ARPC1B; ABI2; ARPC2; LIMK1; ARPC5; ARPC4; CFL1; ARHGDIA; RAC1; MAPK9; ACTR3; IQGAP1; PAK1	10092; 10096; 10109; 6774; 10095; 396; 3984; 10152; 5601; 1072; 8826; 10093; 5879; 10163; 10006; 5058	54	54
	3.34e-06	5.79e-05	SUMOylation of DNA replication proteins	Reactome	R-HSA-4615885	UBE2I; PCNA; NUP107; SUMO1; SUMO2; NUP93; TOP1; NUP37; NUP155; NUP214; NUP210; NUP205; RANBP2	7329; 9688; 23165; 7341; 5111; 7150; 5903; 23225; 8021; 57122; 6613; 79023; 9631	37	37
	3.56e-06	6.08e-05	Parkin-Ubiquitin Proteasomal System pathway	Wikipathways	WP2359	HSPA2; TUBAL3; HSPA5; CASP1; PSMD14; HSPA14; TUBB; PSMD13; TUBB1; HSPA8; PSMD10; CASP8; UBE2G1; PSMD4; PSMC1; PSMC3; PSMC4; PSMC6; HSPA1L	10213; 5700; 3309; 3306; 7326; 834; 5704; 5706; 5702; 203068; 81027; 79861; 51182; 5719; 3312; 841; 5716; 5710; 3305	73	73
	3.56e-06	6.08e-05	Transport of Mature mRNA derived from an Intron-Containing Transcript	Reactome	R-HSA-159236	SRSF5; SRSF4; NXF1; NCBP2; NUP107; SRRM1; NUP93; SRSF2; SRSF9; ALYREF; NUP37; POLDIP3; NUP205; NUP155; NUP214; THOC2; NUP210; EIF4A3; RANBP2	57187; 10250; 9688; 22916; 9775; 8683; 23165; 6429; 9631; 5903; 10189; 10482; 23225; 57122; 84271; 8021; 79023; 6430; 6427	73	73
	3.63e-06	6.13e-05	Termination of translesion DNA synthesis	Reactome	R-HSA-5656169	PCNA; TRIM25; RPS27A; RPA1; UBA52; RPA2; UBA7; USP10; RFC4; UBB; UBC; RFC2	7706; 9100; 6118; 5111; 7316; 7311; 5982; 6117; 5984; 7314; 6233; 7318	32	32
	4.44e-06	7.45e-05	EPH-Ephrin signaling	Reactome	R-HSA-2682334	SRC; PAK1; ACTG1; RAC1; ARPC2; LIMK1; FYN; ROCK1; ROCK2; ARPC4; ARPC5; CFL1; ARPC1B; LYN; PAK3; ACTR3; ACTB; YES1; GIT1	10109; 4067; 10092; 9475; 6714; 2534; 3984; 5879; 71; 6093; 7525; 1072; 28964; 10095; 10093; 5063; 60; 10096; 5058	74	74
	4.49e-06	7.48e-05	Asparagine N-linked glycosylation	Reactome	R-HSA-446203	CAPZB; GANAB; DYNLL1; RPS27A; RPN2; DDOST; ARFGAP2; MAGT1; PMM2; DCTN4; TMED10; COPZ1; BET1; TMED3; SEC23A; TMED9; NAPG; PSMC1; UBXN1; DPM1; UGGT1; COPE; CTSA; CTSC; PDIA3; MAN2A1; GMPPB; SEC24D; CTSZ; LMAN1; YKT6; DYNC1LI2; NAGK; ANKRD28; CAPZA1; CALR; TRAPPC4; UBA52; GOLGB1; UBB; UBC; GFPT1; GFPT2; COPB2; GBF1; TFG	8774; 829; 51035; 1650; 832; 22818; 54732; 10282; 2673; 23243; 51164; 5373; 6185; 23193; 1783; 10484; 1522; 5700; 811; 8813; 51399; 1075; 9276; 8655; 3998; 56886; 55577; 2804; 8729; 7311; 29925; 23423; 4124; 7314; 9945; 5476; 84061; 10972; 2923; 9871; 84364; 10342; 7316; 10652; 11316; 6233	286	285
	4.75e-06	7.86e-05	Metabolism	Reactome	R-HSA-1430728	AGK; MAN2B1; LYPLA1; SUMO2; NDUFB3; TACO1; CPNE6; ESYT2; SLC25A19; PYCR2; PYCR1; ARL2BP; PLIN3; SGPL1; AHCYL1; DCK; RAN; ADI1; CIAPIN1; NDUFB10; HSP90AB1; RARS; NDUFA10; NME1-NME2; NUP214; GMPS; VAC14; PIP4K2C; GUSB; IARS; MGST1; HK2; CTSA; IDH1; POR; NUP93; VAPB; OSBPL8; SMARCD3; RPL11; RPL12; GLA; CSNK2A2; NADSYN1; MTMR3; PCYT1A; NME1; NME2; NME3; ACSL3; ACSL4; NUP210; PLEKHA5; UBA52; PNPO; ALD…	4831; 6155; 160428; 56474; 55697; 10768; 6201; 23165; 2197; 64419; 8503; 2181; 56922; 8310; 3615; 7172; 9255; 1460; 8021; 5476; 2098; 1719; 10434; 771; 4830; 9049; 2167; 1806; 2747; 5471; 4698; 55163; 3921; 5575; 6233; 2776; 6230; 191; 6223; 3614; 79718; 6613; 3417; 204; 10654; 4716; 5901; 131870; 4709; 79837; 8897; 57122; 6818; 1350; 6156; 47; 8826; 57019; 6135; 6146; 960; 336; 6124; 4700; 25930…	1972	1960
	5.13e-06	8.43e-05	EGF-EGFR Signaling Pathway	Wikipathways	WP437	PCNA; CRKL; EGFR; MAP2K2; MAP2K1; DNM1; CAV2; IQGAP1; SH3GL2; EPS15; STAT3; STAT1; STAM2; MAPK9; ERBB2; SRC; CSK; RAC1; PRKCB; PRKCD; CAMK2A; AP2A1; CFL1; SOS2; PLSCR1; ABI1; ROCK1; GRB2; PDPK1; PAK1; RALA	5170; 6093; 5580; 1072; 815; 1956; 6714; 6655; 2060; 2064; 5605; 5604; 5601; 6456; 1399; 5579; 6774; 6772; 10254; 2885; 858; 8826; 5898; 160; 10006; 5111; 5058; 5359; 1445; 1759; 5879	162	162
	5.28e-06	8.54e-05	Rev-mediated nuclear export of HIV RNA	Reactome	R-HSA-165054	RCC1; NUP107; RAN; RANBP1; NUP93; RANGAP1; NUP37; NUP155; NUP214; NUP210; NUP205; RANBP2	5901; 9688; 5905; 23165; 5903; 23225; 57122; 5902; 8021; 79023; 1104; 9631	33	33
	5.28e-06	8.54e-05	Transport of the SLBP independent Mature mRNA	Reactome	R-HSA-159227	NXF1; NCBP2; NUP107; NUP93; ALYREF; NUP37; NUP214; NUP155; EIF4E; NUP210; NUP205; RANBP2	9688; 22916; 23165; 5903; 10189; 10482; 23225; 1977; 57122; 8021; 79023; 9631	33	33
	5.39e-06	8.65e-05	Influenza Viral RNA Transcription and Replication	Reactome	R-HSA-168273	GTF2F2; NUP107; NUP93; NUP37; POLR2E; POLR2G; NUP155; HSP90AA1; NUP214; POLR2L; NUP210; POLR2H; NUP205; RANBP2	9688; 23165; 5437; 5434; 5441; 3320; 5903; 23225; 2963; 57122; 8021; 79023; 9631; 5436	44	44
	5.46e-06	8.7e-05	EGF	INOH	None	YWHAZ; SOS2; YWHAQ; EGFR; MAP2K1; SFN; MAP2K2; YWHAH; GRB2; YWHAB; YWHAG	7532; 1956; 2885; 7534; 5605; 6655; 7529; 2810; 7533; 5604; 10971	28	28
	5.94e-06	9.4e-05	Influenza A - Homo sapiens (human)	KEGG	path:hsa05164	HSPA2; ACTG1; HSPA8; MX1; MAP2K2; PRSS3; EIF2S1; HSPA1L; STAT1; DNAJB1; PIK3CD; PIK3R3; ICAM1; PML; NFKB1; MAPK9; HLA-DPB1; PABPN1; NXF1; TRIM25; PRKCB; PYCARD; HNRNPUL1; IL18; MYD88; TBK1; CASP1; EIF2AK2; MAP2K1; DNAJC3; KPNA1; ACTB	4615; 5646; 3606; 7706; 60; 71; 3383; 6772; 5293; 4790; 3305; 3306; 3312; 10482; 5371; 3836; 3115; 3337; 8503; 834; 5601; 11100; 8106; 1965; 29108; 29110; 5579; 5604; 5605; 5610; 5611; 4599	171	171
	6.29e-06	9.81e-05	HSP90 chaperone cycle for steroid hormone receptors (SHR)	Reactome	R-HSA-3371497	HSPA2; NR3C1; DNAJB1; HSPA8; HSP90AB1; FKBP5; HSP90AA1; STIP1; HSPA1L	3320; 10963; 3326; 3312; 3306; 2289; 2908; 3337; 3305	19	19
	6.29e-06	9.81e-05	Translesion Synthesis by POLH	Reactome	R-HSA-110320	PCNA; RFC4; RPS27A; RPA1; RPA2; UBA52; UBB; UBC; RFC2	7316; 5984; 7311; 6118; 7314; 6233; 5982; 6117; 5111	19	19
	6.86e-06	0.000106344	Sumoylation by RanBP2 regulates transcriptional repression	PID	ranbp2pathway	UBE2I; HDAC1; RAN; RANGAP1; SUMO1; NUP214; NUP210; RANBP2	5901; 5903; 7329; 7341; 3065; 8021; 5905; 23225	15	15
	7.56e-06	0.000115602	Alpha4 beta1 integrin signaling events	PID	integrin_a4b1_pathway	YWHAZ; SRC; PRKAR1A; RAC1; ABI1; THBS1; CD14; SPP1; GIT1; PRKAR1B; PXN; VCAM1	929; 7057; 7412; 6714; 28964; 5829; 6696; 5879; 7534; 5573; 5575; 10006	34	34
	7.56e-06	0.000115602	Transport of the SLBP Dependant Mature mRNA	Reactome	R-HSA-159230	NXF1; NCBP2; NUP107; NUP93; ALYREF; NUP37; NUP214; NUP155; EIF4E; NUP210; NUP205; RANBP2	9688; 22916; 23165; 5903; 10189; 10482; 23225; 1977; 57122; 8021; 79023; 9631	34	34
	7.64e-06	0.000115952	Response to elevated platelet cytosolic Ca2+	Reactome	R-HSA-76005	HSPA5; FAM3C; STXBP3; STXBP2; SERPINE1; SERPINA3; THBS1; SPARC; TTN; MANF; TAGLN2; CD63; WDR1; FAM49B; PRKCB; FERMT3; CFL1; TEX264; ALDOA; ORM1; ORM2; CD109; RARRES2; CALU; PFN1; MAGED2; PPIA	10447; 6814; 7873; 7273; 1072; 3309; 7057; 5478; 51571; 5054; 51368; 5216; 5919; 135228; 5005; 8407; 12; 813; 10916; 6813; 83706; 5579; 6678; 9948; 226; 5004; 967	134	134
	7.71e-06	0.000116162	Prolactin	NetPath	Pathway_Prolactin	ERBB2; SRC; YWHAZ; STAT3; ERBB4; STAT1; FYN; EGFR; PPIB; MAP2K2; MAP2K1; GRB2; PXN; NFKB1; MAPK9; YWHAG; PPIA; PAK1	7532; 5479; 4790; 6772; 6714; 5478; 1956; 2885; 2064; 7534; 5601; 5829; 6774; 2066; 5604; 5605; 2534; 5058	70	70
	8.98e-06	0.000134394	Transport of Mature mRNA Derived from an Intronless Transcript	Reactome	R-HSA-159231	NXF1; NCBP2; NUP107; NUP93; ALYREF; NUP37; NUP214; CPSF1; NUP155; EIF4E; NUP210; NUP205; RANBP2	29894; 9688; 22916; 23165; 5903; 10189; 10482; 1977; 23225; 57122; 8021; 79023; 9631	40	40
	9.5e-06	0.000141361	Nucleotide Excision Repair	Reactome	R-HSA-5696398	SUMO1; RFC4; RPS27A; RFC2; RUVBL1; AQR; PCNA; SUMO2; POLR2E; POLR2G; POLR2L; UBE2V2; COPS7B; POLR2H; UBE2I; RPA1; RPA2; CUL4A; UBA52; ACTL6A; UBB; UBC; RBX1; ACTB	8451; 6118; 86; 64708; 5982; 7336; 8607; 7316; 9716; 6613; 9978; 60; 7329; 7311; 5437; 7314; 5434; 5441; 7341; 5111; 5984; 6233; 6117; 5436	113	113
	1e-05	0.000147684	JAK-STAT	Wikipathways	WP2593	BCL2L1; EGFR; BAX; MAP2K2; MAP2K1; IKBKG; YWHAZ; STAT3; STAT1; FYN; PXN; NFKB1; MAPK9; SRC; RAC1; CFL2; EIF4E; ROCK1; ROCK2; PDK1; GRB2; PAK1; PPIA	9475; 6093; 5478; 5829; 1073; 1956; 6714; 598; 5605; 5604; 5601; 7534; 8517; 581; 6774; 6772; 5879; 2885; 5058; 5163; 4790; 1977; 2534	106	106
	1.04e-05	0.000152837	Human cytomegalovirus infection - Homo sapiens (human)	KEGG	path:hsa05163	TAP1; PDGFRA; AKAP13; CRKL; EGFR; BAX; MAP2K2; MAP2K1; CASP8; STAT3; PPP3R1; TBK1; PIK3CD; PIK3R3; PXN; GNB4; NFKB1; SRC; RAC2; RAC3; RAC1; PDIA3; PRKCB; GNB1; GNB2; SOS2; GNAQ; GNAS; CALML3; CALR; ROCK1; ROCK2; GRB2; GNA12; GNA13; PPP3CA; RHEB; IKBKG	1399; 5156; 6714; 581; 6774; 5829; 5293; 4790; 2768; 6009; 2776; 2778; 2782; 2783; 6890; 5879; 5880; 5881; 9475; 810; 811; 8503; 2885; 841; 2923; 5530; 5534; 8517; 1956; 10672; 29110; 5579; 6093; 11214; 59345; 5604; 5605; 6655	225	225
	1.07e-05	0.000156615	Association Between Physico-Chemical Features and Toxicity Associated Pathways	Wikipathways	WP3680	ERBB2; SRC; ACTA1; ERBB4; NEFM; NEFL; EGFR; PFN2; ROCK2; NEFH; GPX1; PFN1; MAP2K1; GRB2; CAMK1; ACTR3; PAK1	9475; 5216; 5604; 5217; 2885; 4741; 4747; 4744; 2876; 6714; 8536; 58; 10096; 1956; 2066; 5058; 2064	65	65
	1.18e-05	0.000170714	Adherens junction - Homo sapiens (human)	KEGG	path:hsa04520	ERBB2; SRC; PARD3; RAC2; ACTG1; WASF2; PTPRF; IQGAP1; FYN; RAC1; EGFR; CSNK2B; MET; NLK; ACTB; CSNK2A2; YES1; RAC3	4233; 5792; 6714; 1956; 71; 1459; 10163; 1460; 60; 7525; 56288; 2064; 2534; 51701; 5879; 5880; 5881; 8826	72	72
	1.22e-05	0.000173947	EGFR downregulation	Reactome	R-HSA-182971	EPS15; STAM2; RPS27A; EGFR; UBA52; GRB2; UBB; UBC; SH3GL1; SH3GL2	2060; 1956; 2885; 7316; 7311; 10254; 6456; 7314; 6233; 6455	25	25
	1.22e-05	0.000173947	Transport of Mature mRNAs Derived from Intronless Transcripts	Reactome	R-HSA-159234	NXF1; NCBP2; NUP107; NUP93; ALYREF; NUP37; NUP214; CPSF1; NUP155; EIF4E; NUP210; NUP205; RANBP2	29894; 9688; 22916; 23165; 5903; 10189; 10482; 23225; 1977; 57122; 8021; 79023; 9631	41	41
	1.22e-05	0.000173947	mechanism of protein import into the nucleus	BioCarta	npcpathway	RCC1; RAN; NUP210; RANGAP1; NUP214; RANBP1; RANBP2	5902; 8021; 5903; 5901; 23225; 1104; 5905	12	12
	1.28e-05	0.00017998	Sema3A PAK dependent Axon repulsion	Reactome	R-HSA-399954	RAC1; LIMK1; FYN; HSP90AB1; CFL1; HSP90AA1; PAK1; PAK3	3320; 5063; 5879; 3326; 1072; 5058; 3984; 2534	16	16
	1.35e-05	0.000188986	Clathrin-mediated endocytosis	Reactome	R-HSA-8856828	FNBP1; CTTN; NECAP2; HSPA8; EGFR; DNM1; DNM3; SH3GL1; SH3GL2; EPS15; STAM2; ITSN2; TFRC; GAK; RPS27A; GAPVD1; ARPC2; ARPC5; ARPC4; AP2A1; AP2A2; COPS7B; UBA52; GRB2; UBB; UBC; ACTR3	10096; 10109; 1956; 1759; 2580; 2885; 64708; 10254; 10092; 6456; 3312; 7037; 2017; 50618; 55707; 161; 2060; 7311; 7314; 6455; 10093; 23048; 160; 7316; 26052; 26130; 6233	138	138
	1.63e-05	0.000226329	tRNA Aminoacylation	Reactome	R-HSA-379724	LARS; KARS; IARS; TARS2; VARS; AARS; WARS; AIMP1; RARS; YARS; PPA2; SARS; GARS	8565; 5917; 7407; 16; 51520; 9255; 2617; 80222; 3376; 3735; 7453; 27068; 6301	42	42
	1.63e-05	0.000226329	Viral Messenger RNA Synthesis	Reactome	R-HSA-168325	GTF2F2; NUP107; NUP93; NUP37; POLR2E; POLR2G; NUP155; NUP214; POLR2L; NUP210; POLR2H; NUP205; RANBP2	9688; 23165; 5437; 5434; 5441; 5903; 23225; 2963; 57122; 8021; 79023; 9631; 5436	42	42
	1.71e-05	0.000233297	Systemic lupus erythematosus - Homo sapiens (human)	KEGG	path:hsa05322	HIST1H2AM; HIST1H2AL; HIST1H2AI; HIST1H2AH; HIST1H2AK; HIST1H2AJ; HIST1H2AE; HIST1H2AD; HIST1H2AG; HIST1H2AA; HIST1H2AC; HIST1H2AB; TROVE2; C2; HIST2H2AA3; HIST2H2AA4; HLA-DPB1; HIST1H2BA; HIST2H2AB; HIST2H2AC; H2AFV; SNRPD3; H2AFX; H2AFZ; H2AFJ; HIST3H2A	94239; 3115; 6738; 8329; 8330; 8331; 8332; 8334; 8335; 8336; 8337; 8338; 717; 85235; 8969; 255626; 317772; 723790; 92815; 221613; 3012; 3013; 3014; 3015; 55766; 6634	133	132
	1.72e-05	0.000233297	HSF1 activation	Reactome	R-HSA-3371511	HSPH1; HSPB1; EEF1A1; DNAJB1; RPA1; RPA2; HSP90AB1; UBB; HSP90AA1; SERPINH1; HSPA1L	6117; 7314; 6118; 3320; 3315; 1915; 871; 3305; 10808; 3326; 3337	31	31
	1.72e-05	0.000233297	Recognition of DNA damage by PCNA-containing replication complex	Reactome	R-HSA-110314	PCNA; RFC4; RPS27A; RPA1; RFC2; CUL4A; UBA52; UBB; UBC; RBX1; RPA2	8451; 5111; 7316; 7311; 5982; 6117; 5984; 9978; 7314; 6233; 6118	31	31
	1.77e-05	0.000235942	Fibroblast growth factor-1	NetPath	Pathway_Fibroblast__growth__factor-1	SRC; CTTN; CDV3; TFRC; STAT3; RAN; MAPK9; STAM2; TMEM63B; PRKCD; MAP2K2; MAP2K1; GRB2; HSP90AA1; NFKB1; LRRC59; CSNK2B; SCAMP3	10067; 55573; 4790; 7037; 3320; 2885; 2017; 5901; 5605; 6774; 1460; 10254; 6714; 55379; 5580; 5601; 5604; 55362	74	74
	1.77e-05	0.000235942	IL6	NetPath	Pathway_IL6	HDAC1; ERBB2; STAT3; STAT1; HSPB1; RAC1; FYN; PRKCD; EIF2A; HSP90AA1; MAP2K2; MAP2K1; GRB2; HCK; EIF4E; NFKB1; NLK; LYN	83939; 51701; 4067; 3065; 4790; 6772; 3055; 2534; 3320; 3315; 2885; 2064; 5879; 1977; 5605; 6774; 5580; 5604	74	74
	1.77e-05	0.000235942	Estrogen-dependent gene expression	Reactome	R-HSA-9018519	HDAC1; CARM1; HIST1H2AK; HIST1H2AJ; HIST1H2AE; HIST1H2AD; HIST1H2AC; HIST1H2AB; POLR2H; CBFB; HIST2H2AA3; HIST2H2AA4; SMC1A; STAG1; ERBB4; RAD21; PRMT1; POLR2E; POLR2G; HIST1H2BA; POLR2L; HIST2H2AC; H2AFV; GTF2F2; H2AFX; H2AFZ; H2AFJ	255626; 3065; 8330; 3014; 5885; 3013; 55766; 10498; 723790; 8335; 865; 3012; 5437; 10274; 3276; 8338; 8337; 5434; 5441; 8331; 2963; 8334; 3015; 2066; 94239; 5436; 8243	142	140
	1.78e-05	0.000235942	Alcoholism - Homo sapiens (human)	KEGG	path:hsa05034	HDAC1; HIST1H2AM; HIST1H2AL; MAP2K1; HIST1H2AI; HIST1H2AH; HIST1H2AK; HIST1H2AJ; HIST1H2AE; HIST1H2AD; HIST1H2AG; HIST1H2AA; HIST1H2AC; HIST1H2AB; HIST2H2AA3; HIST2H2AA4; GNB4; GNB1; GNB2; HIST1H2BA; HIST2H2AB; HIST2H2AC; H2AFV; SOS2; GNAS; CALML3; H2AFX; H2AFZ; CAMKK2; GRB2; H2AFJ; HIST3H2A	8330; 8331; 8332; 8334; 92815; 8336; 8337; 8338; 94239; 2778; 2782; 2783; 85235; 8969; 810; 8329; 255626; 2885; 317772; 723790; 8335; 10645; 221613; 3012; 3013; 3014; 3015; 59345; 55766; 5604; 3065; 6655	180	180
	2.03e-05	0.000266833	Interactions of Rev with host cellular proteins	Reactome	R-HSA-177243	RCC1; NUP107; RAN; RANBP1; NUP93; RANGAP1; NUP37; NUP155; NUP214; NUP210; NUP205; RANBP2	5901; 9688; 5905; 23165; 5903; 23225; 57122; 5902; 8021; 79023; 1104; 9631	37	37
	2.03e-05	0.000266833	RHO GTPases Activate WASPs and WAVEs	Reactome	R-HSA-5663213	ACTG1; WASF2; RAC1; ABI2; ARPC2; ABI1; ARPC5; ARPC4; GRB2; ARPC1B; ACTB; ACTR3	10092; 10096; 10109; 10095; 2885; 10152; 5879; 10093; 71; 10163; 60; 10006	37	37
	2.16e-05	0.000279624	DNA Damage Bypass	Reactome	R-HSA-73893	PCNA; TRIM25; RPS27A; RPA1; UBA52; RFC2; CUL4A; UBA7; USP10; RFC4; UBB; UBC; RBX1; RPA2	7706; 8451; 9100; 5111; 7316; 7311; 5982; 6117; 5984; 9978; 7314; 6233; 7318; 6118	49	49
	2.17e-05	0.000279624	Signaling by EGFR	Reactome	R-HSA-177929	EPS15; CSK; SRC; STAM2; RPS27A; EGFR; UBA52; GRB2; PXN; UBB; UBC; SH3GL1; SH3GL2	1445; 1956; 2060; 5829; 7316; 7311; 2885; 10254; 6714; 6456; 7314; 6233; 6455	43	43
	2.17e-05	0.000279624	Intrinsic Pathway for Apoptosis	Reactome	R-HSA-109606	BCL2L1; YWHAZ; DYNLL1; PPP3R1; YWHAQ; BAX; SFN; YWHAH; DIABLO; NMT1; YWHAB; CASP8; YWHAG	8655; 7532; 5534; 10971; 581; 598; 56616; 841; 7534; 7529; 2810; 7533; 4836	43	43
	2.19e-05	0.000280947	COPI-dependent Golgi-to-ER retrograde traffic	Reactome	R-HSA-6811434	COPZ1; KLC4; TMED3; KIF1B; COPE; KIF2A; KIF5B; KIF21A; NAPG; GBF1; ARFGAP2; TMED9; KIF5A; KLC1; ZW10; COPB2; NBAS; BNIP1; TMED10	3796; 51594; 8774; 10972; 3799; 11316; 84364; 8729; 9183; 3798; 55605; 89953; 23423; 22818; 54732; 3831; 9276; 662; 23095	82	82
	2.24e-05	0.00028501	y branching of actin filaments	BioCarta	actinypathway	WASF2; RAC1; ARPC2; ARPC4; PSMA7; ARPC1B; PIR; ACTR3	5688; 10109; 8544; 10095; 10093; 10163; 10096; 5879	17	17
	2.42e-05	0.000307071	Endosomal Sorting Complex Required For Transport (ESCRT)	Reactome	R-HSA-917729	UBB; VPS36; CHMP4A; STAM2; RPS27A; UBA52; CHMP2A; RNF103-CHMP3; UBC; CHMP3; VTA1	51028; 29082; 27243; 51534; 7316; 7311; 51652; 100526767; 10254; 7314; 6233	32	32
	2.47e-05	0.000310695	guanosine ribonucleotides <i>de novo</i> biosynthesis	HumanCyc	PWY-7221	NME1; NME2; NME3; NME1-NME2; IMPDH1; IMPDH2; GMPS	4832; 8833; 4830; 3614; 654364; 4831; 3615	13	13
	2.61e-05	0.000327335	IL2	NetPath	Pathway_IL2	NR3C1; STAT3; CRKL; STAT1; FYN; EIF3B; PIK3CD; MAP2K2; MAP2K1; GRB2; PIK3R3; NFKB1; EIF4E; HSP90AA1; LYN; YBX1; STAM2; NMI	4067; 3320; 1977; 6772; 5293; 9111; 4790; 8503; 1399; 2885; 2908; 5605; 6774; 8662; 10254; 4904; 5604; 2534	76	76
	2.71e-05	0.000337228	superpathway of pyrimidine deoxyribonucleotides <i>de novo</i> biosynthesis	HumanCyc	PWY-7211	NTPCR; CTPS2; NME2; NME3; NME1-NME2; CMPK2; DTYMK; CAD; NME1	56474; 1841; 4831; 4830; 654364; 4832; 129607; 84284; 790	22	22
	2.76e-05	0.000341314	G13 Signaling Pathway	Wikipathways	WP524	RAC1; LIMK1; PIK3CD; ROCK1; ROCK2; PFN1; ARHGDIB; GNA13; CFL1; PAK3; IQGAP1; CFL2	10672; 5293; 5216; 397; 9475; 1072; 1073; 8826; 5063; 6093; 3984; 5879	38	38
	2.78e-05	0.000341825	Signaling by ERBB2	Reactome	R-HSA-1227986	ERBB2; SRC; ERBB4; FYN; RPS27A; EGFR; PRKCD; UBA52; GRB2; CUL5; UBB; UBC; HSP90AA1; YES1	7525; 2066; 6714; 2534; 3320; 1956; 2885; 2064; 7316; 7311; 8065; 5580; 7314; 6233	50	50
	3.08e-05	0.000376933	B cell receptor signaling pathway - Homo sapiens (human)	KEGG	path:hsa04662	IFITM1; RAC2; RAC3; PPP3R1; RAC1; PRKCB; PIK3CD; MAP2K2; MAP2K1; GRB2; PIK3R3; IKBKG; NFKB1; PPP3CA; LYN; PIK3AP1; SOS2	8503; 118788; 5530; 5534; 8517; 5293; 4790; 2885; 8519; 5579; 4067; 5604; 5605; 5879; 5880; 5881; 6655	71	70
	3.15e-05	0.000383241	Global Genome Nucleotide Excision Repair (GG-NER)	Reactome	R-HSA-5696399	UBE2I; PCNA; RPS27A; RUVBL1; SUMO1; RFC4; SUMO2; RPA1; RFC2; CUL4A; UBA52; ACTL6A; UBB; UBC; RBX1; UBE2V2; RPA2; COPS7B; ACTB	7341; 7329; 8451; 86; 5111; 7316; 7311; 64708; 5982; 6613; 5984; 9978; 7336; 7314; 6233; 6117; 8607; 60; 6118	84	84
	3.29e-05	0.000398314	Platelet degranulation	Reactome	R-HSA-114608	HSPA5; FAM3C; STXBP2; SERPINE1; SERPINA3; THBS1; SPARC; TTN; MANF; TAGLN2; CD63; WDR1; FAM49B; FERMT3; CFL1; TEX264; ALDOA; ORM1; ORM2; CD109; RARRES2; CALU; PFN1; MAGED2; PPIA	10447; 7873; 7273; 1072; 3309; 7057; 5478; 51571; 5054; 51368; 5216; 135228; 5005; 8407; 12; 813; 10916; 6813; 83706; 6678; 9948; 226; 5004; 5919; 967	129	129
	3.57e-05	0.000429936	mTOR signaling pathway	PID	mtor_4pathway	RPTOR; YWHAZ; MAP2K2; POLDIP3; YWHAQ; MAP2K1; SFN; EIF4E; YWHAH; YWHAB; PML; PDPK1; RHEB; EIF4A1; YWHAG; EEF2	7532; 5170; 6009; 10971; 57521; 7534; 1973; 5371; 1977; 5605; 7529; 84271; 2810; 7533; 1938; 5604	65	64
	3.69e-05	0.000442206	Translesion synthesis by Y family DNA polymerases bypasses lesions on DNA template	Reactome	R-HSA-110313	PCNA; TRIM25; RPS27A; RPA1; UBA52; RPA2; UBA7; USP10; RFC4; UBB; UBC; RFC2	7706; 9100; 6118; 5111; 7316; 7311; 5982; 6117; 5984; 7314; 6233; 7318	39	39
	3.72e-05	0.000443185	Proteasome - Homo sapiens (human)	KEGG	path:hsa03050	PSMC3; PSMB10; PSMD4; PSMD13; PSMD14; PSMA1; PSMA7; PSMA5; PSMC1; PSMA8; PSMB4; PSMC4; PSMC6	5682; 5686; 5688; 5692; 5699; 5700; 5702; 5704; 5706; 5710; 5719; 10213; 143471	45	45
	3.74e-05	0.000443561	Regulation of signaling by CBL	Reactome	R-HSA-912631	CRKL; FYN; PIK3CD; GRB2; PIK3R3; HCK; LYN; YES1	7525; 4067; 2534; 5293; 8503; 2885; 1399; 3055	18	18
	3.9e-05	0.000460094	Attenuation phase	Reactome	R-HSA-3371568	HSPA2; HSPH1; HSPB1; DNAJB1; HSPA8; HSP90AB1; UBB; HSP90AA1; SERPINH1; HSPA1L	7314; 3320; 3315; 3306; 871; 3305; 10808; 3326; 3312; 3337	28	28
	4.06e-05	0.000475812	mRNA 3,-end processing	Reactome	R-HSA-72187	SRSF5; SRSF4; PABPN1; NCBP2; SRSF2; SRRM1; CSTF1; SRSF9; ALYREF; CSTF2; POLDIP3; EIF4A3; CPSF7; THOC2; CPSF1	57187; 10250; 1478; 22916; 6430; 8683; 79869; 1477; 6429; 29894; 10189; 9775; 84271; 6427; 8106	58	58
	4.27e-05	0.000497996	B-WICH complex positively regulates rRNA expression	Reactome	R-HSA-5250924	DDX21; HIST1H2AC; HIST1H2AJ; H2AFX; H2AFV; H2AFZ; HIST2H2AC; POLR2E; BAZ1B; HIST1H2BA; HIST1H2AK; POLR2L; HIST1H2AE; HIST1H2AD; ACTB; HIST2H2AA3; HIST2H2AA4; POLR2H; H2AFJ; HIST1H2AB	255626; 723790; 5437; 8330; 9031; 3014; 8338; 3013; 55766; 9188; 60; 8335; 3012; 8337; 5434; 5441; 8331; 8334; 3015; 94239	94	93
	4.29e-05	0.000497996	Diseases of signal transduction	Reactome	R-HSA-5663202	HDAC1; PDGFRA; APBB1IP; PIK3CD; RPS27A; EGFR; MAP2K2; MAP2K1; CPSF6; AGK; IQGAP1; PIK3AP1; QKI; STAT3; ERBB4; STAT1; FYN; PIK3R3; ZC3HAV1; MARK3; YWHAB; ERBB2; SRC; CSK; ERLEC1; UBC; FXR1; SND1; HSP90AA1; TBL1XR1; PHB; AKAP9; KIT; MET; UBA52; GRB2; UBB; FKBP1A; PDPK1	5293; 3065; 118788; 54518; 2534; 1956; 7529; 5605; 8826; 55750; 6772; 6714; 27044; 79718; 2064; 4140; 5604; 4233; 10142; 27248; 5245; 2885; 7311; 3815; 8087; 7314; 2280; 8503; 5170; 1445; 56829; 3320; 5156; 7316; 11052; 6774; 2066; 6233; 9444	248	248
	4.34e-05	0.000498766	Myometrial Relaxation and Contraction Pathways	Wikipathways	WP289	ACTA2; ACTA1; ACTG1; ATP2A2; ATP2A3; ACTC1; MAFF; YWHAZ; YWHAQ; YWHAH; YWHAB; NFKB1; YWHAG; CAMK2D; GNB4; PRKCB; GNB1; PRKCD; CAMK2A; IGFBP3; IGFBP1; PRKAR1A; PRKAR1B; GNB2; GNAQ; GNAS; SFN; ACTB	815; 817; 23764; 3484; 3486; 60; 59; 58; 2778; 2776; 2783; 7534; 7533; 7532; 7529; 5580; 5579; 5575; 5573; 71; 70; 2810; 59345; 488; 489; 4790; 2782; 10971	155	155
	4.37e-05	0.000498766	Vif-mediated degradation of APOBEC3G	Reactome	R-HSA-180585	UBC; RPS27A; UBA52; UBB; CUL5; RBX1	7316; 7311; 9978; 8065; 7314; 6233	10	10
	4.37e-05	0.000498766	Positive epigenetic regulation of rRNA expression	Reactome	R-HSA-5250913	HDAC1; HIST1H2AK; HIST1H2AJ; HIST1H2AE; HIST1H2AD; CBX3; HIST1H2AC; HIST1H2AB; HIST2H2AC; HIST2H2AA3; HIST2H2AA4; H2AFV; POLR2E; BAZ1B; HIST1H2BA; POLR2L; POLR2H; DDX21; H2AFX; H2AFZ; ACTB; H2AFJ	255626; 3065; 723790; 8330; 9031; 3014; 8338; 3013; 55766; 9188; 60; 8335; 3012; 5437; 11335; 8337; 5434; 5441; 8331; 94239; 8334; 3015	109	108
	4.46e-05	0.000506355	RUNX1 regulates transcription of genes involved in differentiation of HSCs	Reactome	R-HSA-8939236	H2AFV; RPS27A; UBB; HIST1H2AC; UBC; H2AFX; H2AFZ; UBA52; CBFB; HIST1H2BA; HIST1H2AK; HIST1H2AJ; HIST1H2AE; HIST1H2AD; HIST2H2AA3; HIST2H2AA4; HIST2H2AC; H2AFJ; HIST1H2AB	255626; 723790; 8330; 3014; 8338; 3013; 55766; 7311; 865; 3012; 7314; 8337; 8335; 8331; 7316; 8334; 3015; 6233; 94239	88	86
	4.49e-05	0.000508159	Apoptotic execution phase	Reactome	R-HSA-75153	LMNB1; DBNL; HMGB1; ROCK1; CASP8; VIM; STK24; PLEC; KPNA1; HIST1H1D; HIST1H1E; PRKCD; HIST1H1B; HIST1H1C	4001; 8428; 3007; 3146; 3009; 7431; 3006; 3836; 841; 3008; 6093; 5580; 5339; 28988	52	52
	5.02e-05	0.000564056	HDACs deacetylate histones	Reactome	R-HSA-3214815	HDAC1; HIST2H2AA3; TBL1XR1; HIST1H2AC; HIST1H2AA; HIST2H2AB; HIST1H2AM; HIST1H2AL; HIST1H2AI; HIST1H2BA; HIST1H2AK; HIST1H2AJ; HIST1H2AE; HIST1H2AD; HIST1H2AG; HIST1H2AB; HIST2H2AA4; HIST2H2AC; HIST3H2A; HIST1H2AH	255626; 3065; 723790; 8336; 8330; 8329; 8332; 79718; 221613; 3013; 317772; 85235; 8335; 3012; 8338; 8337; 92815; 8331; 8334; 8969	94	94
	5.04e-05	0.000564056	MET in type 1 papillary renal cell carcinoma	Wikipathways	WP4205	SRC; STAT3; SOS2; CRKL; MET; RAC1; PIK3CD; MAP2K2; MAP2K1; GRB2; PIK3R3; RPL11; PAK4; PAK1; PAK3	8503; 10298; 5058; 5293; 5605; 5604; 2885; 1399; 5063; 6714; 4233; 6774; 6655; 6135; 5879	59	59
	5.49e-05	0.000611815	Oxidative Stress Induced Senescence	Reactome	R-HSA-2559580	MAP4K4; RPS27A; TNIK; HIST1H2AK; HIST1H2AJ; HIST1H2AE; HIST1H2AD; MAPKAPK3; HIST1H2AC; HIST1H2AB; MINK1; HIST2H2AA3; HIST2H2AA4; CDKN2C; HIST1H2BA; HIST2H2AC; H2AFV; MAPK9; H2AFX; H2AFZ; UBA52; UBB; UBC; H2AFJ	255626; 723790; 8330; 7316; 50488; 3014; 7314; 1031; 3013; 55766; 5601; 23043; 8335; 3012; 8338; 9448; 7867; 8337; 7311; 8331; 8334; 3015; 6233; 94239	126	125
	5.66e-05	0.000626983	Packaging Of Telomere Ends	Reactome	R-HSA-171306	H2AFV; H2AFX; H2AFZ; HIST1H2BA; HIST1H2AC; HIST1H2AK; HIST1H2AJ; HIST1H2AE; HIST1H2AD; HIST2H2AA3; HIST2H2AA4; HIST2H2AC; H2AFJ; HIST1H2AB	3014; 8337; 723790; 3013; 8331; 55766; 8335; 3012; 8330; 8334; 3015; 8338; 94239; 255626	54	53
	6.14e-05	0.0006768	Fas	INOH	None	YWHAZ; YWHAQ; CASP8; SFN; YWHAH; BAX; YWHAB; MAPK9; YWHAG	7532; 10971; 581; 841; 7534; 5601; 7529; 2810; 7533	24	24
	6.26e-05	0.000679555	Amyotrophic lateral sclerosis (ALS)	Wikipathways	WP2447	BCL2L1; CASP1; NEFM; NEFL; RAC1; NEFH; BAX; GPX1; MAP2K2; PRPH; PPP3CA	598; 5605; 834; 4741; 4747; 581; 4744; 2876; 5530; 5630; 5879	35	35
	6.26e-05	0.000679555	HGF	INOH	None	SRC; RAC2; RAC3; CRKL; RAC1; MET; PIK3CD; MAP2K2; MAP2K1; GRB2; SOS2	5881; 6714; 5293; 5880; 2885; 1399; 5605; 6655; 5879; 5604; 4233	35	35
	6.26e-05	0.000679555	Class I PI3K signaling events mediated by Akt	PID	pi3kciaktpathway	BCL2L1; SRC; YWHAZ; YWHAQ; SFN; YWHAH; KPNA1; HSP90AA1; YWHAB; PDPK1; YWHAG	7532; 5170; 6714; 10971; 3320; 3836; 598; 7534; 7529; 2810; 7533	35	35
	6.36e-05	0.00068604	HATs acetylate histones	Reactome	R-HSA-3214847	HIST1H2AM; HIST1H2AL; HIST1H2AI; HIST1H2AH; HIST1H2AK; HIST1H2AJ; HIST1H2AE; HIST1H2AD; HIST1H2AG; HIST1H2AA; USP22; HIST1H2AC; HIST1H2AB; RUVBL1; RUVBL2; HIST2H2AA3; HIST2H2AA4; TRRAP; HIST1H2BA; HIST2H2AB; HIST2H2AC; OGT; TAF9; ACTL6A; ACTB; HIST3H2A	723790; 8473; 8336; 86; 8330; 6880; 8607; 8329; 8338; 8332; 221613; 3013; 317772; 60; 8295; 85235; 8335; 3012; 255626; 23326; 8337; 92815; 8331; 8334; 10856; 8969	142	142
	6.38e-05	0.00068604	Protein folding	Reactome	R-HSA-391251	ARFGEF2; PFDN2; STAT3; FBXO6; PFDN6; CCT2; GNB4; NOP56; GNB1; CCT7; TBCA; TUBB1; TUBAL3; VBP1; XRN2; TBCB; ACTB; GNB2; CSNK2B; CSNK2A2; CCT6B	26270; 10574; 2783; 81027; 22803; 1460; 10576; 10471; 1155; 5202; 10693; 2782; 60; 79861; 10528; 7411; 59345; 6902; 1459; 10564; 6774	103	103
	6.41e-05	0.00068604	Gastrin	NetPath	Pathway_Gastrin	ANXA2; STAT3; ELAVL1; EGFR; PRKCD; KIT; MAP2K1; GRB2; PIK3R3; PXN; NFKB1; MAPK9	302; 3815; 1994; 4790; 6774; 1956; 2885; 5601; 5829; 5580; 5604; 8503	41	41
	6.52e-05	0.000687964	TNF	INOH	None	PSMC1; CASP8; MAPK9; PSMA7; PSMB10; PSMD4; PSMB4; PSMD10; PSMD13; PSMA1; BAX; PSMA5; NFKB1; PSMC3; PSMC4; IKBKG	5716; 5699; 5702; 5682; 4790; 5719; 581; 5710; 8517; 5601; 5686; 5704; 5700; 5688; 5692; 841	67	67
	6.52e-05	0.000687964	Cleavage of Growing Transcript in the Termination Region	Reactome	R-HSA-109688	SRSF5; SRSF4; PABPN1; SNRPD3; NCBP2; SRSF2; SRRM1; CSTF1; SRSF9; ALYREF; CSTF2; POLDIP3; EIF4A3; CPSF7; THOC2; CPSF1	57187; 8683; 22916; 6430; 79869; 1477; 6634; 6429; 1478; 29894; 10189; 10250; 9775; 84271; 6427; 8106	67	67
	6.52e-05	0.000687964	RNA Polymerase II Transcription Termination	Reactome	R-HSA-73856	SRSF5; SRSF4; PABPN1; SNRPD3; NCBP2; SRSF2; SRRM1; CSTF1; SRSF9; ALYREF; CSTF2; POLDIP3; EIF4A3; CPSF7; THOC2; CPSF1	57187; 8683; 22916; 6430; 79869; 1477; 6634; 6429; 1478; 29894; 10189; 10250; 9775; 84271; 6427; 8106	67	67
	6.75e-05	0.000709013	Chromosome Maintenance	Reactome	R-HSA-73886	RPA1; RFC2; FEN1; HIST1H2AK; HIST1H2AJ; HIST1H2AE; HIST1H2AD; HIST1H2AC; HIST1H2AB; RUVBL1; RUVBL2; RFC4; HIST2H2AA3; HIST2H2AA4; PCNA; HIST1H2BA; HIST2H2AC; H2AFV; H2AFX; H2AFZ; RPA2; H2AFJ	255626; 723790; 6118; 5982; 6117; 8330; 8607; 3014; 3013; 55766; 8335; 3012; 8338; 8337; 8331; 5111; 94239; 2237; 8334; 5984; 3015; 10856	112	111
	7.64e-05	0.000796916	Oncogenic MAPK signaling	Reactome	R-HSA-6802957	SRC; QKI; AGK; CSK; FXR1; PHB; AKAP9; MAP2K2; MAP2K1; ZC3HAV1; SND1; MARK3; YWHAB; APBB1IP; IQGAP1	1445; 10142; 9444; 5245; 6714; 27044; 55750; 5605; 4140; 54518; 8087; 7529; 8826; 5604; 56829	61	61
	7.7e-05	0.000796916	mcalpain and friends in cell motility	BioCarta	mcalpainpathway	ACTA1; CAPNS1; RAC1; EGFR; MAP2K2; MAP2K1; GRB2; PXN; PRKAR1B; PRKAR1A	58; 1956; 5829; 5573; 5879; 2885; 5605; 826; 5575; 5604	30	30
	7.7e-05	0.000796916	Budding and maturation of HIV virion	Reactome	R-HSA-162588	UBB; CHMP4A; RPS27A; UBA52; CHMP2A; RNF103-CHMP3; UBC; CHMP3; VTA1; PPIA	7316; 29082; 27243; 51534; 5478; 7311; 51652; 100526767; 7314; 6233	30	30
	7.89e-05	0.000804283	Pancreatic cancer - Homo sapiens (human)	KEGG	path:hsa05212	ERBB2; BCL2L1; STAT3; RAC3; STAT1; RAC1; ARHGEF6; EGFR; PIK3CD; BAX; MAP2K1; PIK3R3; IKBKG; NFKB1; MAPK9; RAC2; RALA	5898; 1956; 2064; 5293; 581; 4790; 8503; 8517; 598; 5601; 5604; 9459; 6772; 6774; 5879; 5880; 5881	75	75
	7.89e-05	0.000804283	Epithelial cell signaling in Helicobacter pylori infection - Homo sapiens (human)	KEGG	path:hsa05120	SRC; ATP6V1F; CSK; RAC1; ATP6V1C1; EGFR; ATP6AP1; LYN; MET; IKBKG; ATP6V1C2; NFKB1; ATP6V0D1; MAPK9; PAK1; GIT1	537; 9296; 4233; 9114; 1956; 1445; 4790; 6714; 5058; 8517; 245973; 28964; 5601; 4067; 528; 5879	68	68
	7.89e-05	0.000804283	Gap-filling DNA repair synthesis and ligation in TC-NER	Reactome	R-HSA-6782210	PCNA; POLR2E; AQR; RFC4; RPS27A; RPA1; POLR2G; RPA2; CUL4A; UBA52; UBB; UBC; POLR2L; RFC2; POLR2H; RBX1	9716; 8451; 5434; 5441; 6118; 5111; 7316; 7311; 5982; 6117; 5437; 5984; 9978; 7314; 6233; 5436	68	68
	8.01e-05	0.000804283	double stranded rna induced gene expression	BioCarta	rnapathway	MAP4K4; EIF2AK2; DNAJC3; IKBKG; EIF2S1; EIF2S3; EIF2S2	1965; 8894; 8517; 1968; 5610; 5611; 9448	15	15
	8.01e-05	0.000804283	superpathway of pyrimidine ribonucleotides <i>de novo</i> biosynthesis	HumanCyc	PWY0-162	CTPS2; NME2; NME3; NME1-NME2; CMPK2; NME1; CAD	4832; 56474; 129607; 4830; 654364; 790; 4831	15	15
	8.01e-05	0.000804283	Activation of BAD and translocation to mitochondria	Reactome	R-HSA-111447	YWHAZ; PPP3R1; YWHAQ; SFN; YWHAH; YWHAB; YWHAG	7534; 2810; 7532; 10971; 7529; 7533; 5534	15	15
	8.02e-05	0.000804283	CD4 T cell receptor signaling-NFkB cascade	INOH	None	PSMC1; PSMB4; PSMA1; HLA-DPB1; PDPK1; PSMD4; TAB1; PSMB10; FYN; PSMD10; PSMD13; PIK3CD; TMEM189-UBE2V1; IKBKG; PSMA5; NFKB1; PSMC3; PSMC4; UBE2V1; PSMA7	5702; 2534; 5704; 4790; 5686; 5710; 5700; 5692; 387522; 5716; 8517; 5170; 5688; 5682; 5719; 5293; 10454; 7335; 3115; 5699	97	97
	8.11e-05	0.000809684	Brain-Derived Neurotrophic Factor (BDNF) signaling pathway	Wikipathways	WP2380	MAP2K2; MAP2K1; IKBKG; EIF2S1; EIF2S2; STAT3; STAT1; CAMK1; FYN; IGF2BP1; NFKB1; MAPK9; SRC; RAC1; CAMK2A; PRKCD; CFL1; EIF4E; RHOG; PTPRF; GRB2; SPP1; CDK5; PDPK1; YBX1; EEF2	5170; 4904; 815; 6714; 8536; 5605; 5604; 391; 8517; 1938; 1072; 5580; 6774; 6772; 5879; 2885; 10642; 1020; 1977; 5792; 5601; 6696; 8894; 1965; 4790; 2534	144	144
	8.15e-05	0.000809684	Autophagy - animal - Homo sapiens (human)	KEGG	path:hsa04140	BCL2L1; VMP1; HMGB1; MAP2K2; MAP2K1; EIF2S1; RPTOR; GABARAPL2; ATG16L1; PIK3CD; ATG3; PIK3R3; MAPK9; MTMR3; IGBP1; MTMR14; CTSL; CTSB; PRKCD; ATG12; SNAP29; CAMKK2; PDPK1; RHEB	5170; 3146; 598; 9342; 8897; 5293; 57521; 81671; 55054; 8503; 1508; 6009; 1514; 3476; 10645; 64419; 64422; 1965; 9140; 5580; 5601; 5604; 5605; 11345	128	128
	8.36e-05	0.00082662	Trk receptor signaling mediated by PI3K and PLC-gamma	PID	pi3kplctrkpathway	YWHAZ; SRC; YWHAQ; PRKCD; CAMK2A; SFN; YWHAH; GRB2; YWHAB; PDPK1; YWHAG	7532; 6714; 10971; 7534; 2885; 5170; 7529; 2810; 5580; 7533; 815	36	36
	8.6e-05	0.000846522	Fc gamma R-mediated phagocytosis - Homo sapiens (human)	KEGG	path:hsa04666	PRKCB; RAC2; WASF2; CRKL; RAC1; ARPC1B; LIMK1; PIK3CD; PRKCD; ARPC5; ARPC4; MAP2K1; PIK3R3; CFL2; CFL1; ARPC2; HCK; LYN; PAK1	5293; 1072; 1073; 5879; 5880; 8503; 10092; 10093; 10095; 1399; 10109; 3984; 10163; 5058; 5579; 5580; 4067; 5604; 3055	91	90
	8.8e-05	0.00086253	Ion transport by P-type ATPases	Reactome	R-HSA-936837	ATP2A1; ATP2A2; ATP2A3; CAMK2D; SRI; CAMK2A; ATP12A; ATP13A1; ATP1A4; ATP11C; ATP1A2; ATP1A1; ATP2B3; ATP4A	492; 487; 286410; 476; 495; 479; 817; 6717; 489; 480; 815; 488; 57130; 477	55	55
	8.91e-05	0.000865622	Gap-filling DNA repair synthesis and ligation in GG-NER	Reactome	R-HSA-5696397	PCNA; RFC4; RPS27A; RPA1; RFC2; UBA52; UBB; UBC; RPA2	6118; 5111; 7316; 7311; 5982; 6117; 5984; 7314; 6233	25	25
	8.91e-05	0.000865622	IKK complex recruitment mediated by RIP1	Reactome	R-HSA-937041	RPS27A; UBA52; CD14; TMEM189-UBE2V1; IKBKG; UBB; UBC; LY96; UBE2V1	23643; 929; 8517; 7316; 7311; 7335; 7314; 6233; 387522	25	25
	8.95e-05	0.000865622	RHO GTPases activate KTN1	Reactome	R-HSA-5625970	RAC1; KLC4; KIF5B; KIF5A; KLC1; RHOG	89953; 391; 5879; 3831; 3799; 3798	11	11
	9.25e-05	0.000890927	ER to Golgi Anterograde Transport	Reactome	R-HSA-199977	CAPZB; DYNLL1; ARFGAP2; DCTN4; TMED10; COPZ1; BET1; TMED3; SEC23A; TMED9; NAPG; COPE; CTSC; YKT6; SEC24D; CTSZ; LMAN1; DYNC1LI2; ANKRD28; CAPZA1; TFG; TRAPPC4; GOLGB1; COPB2; GBF1	8774; 10484; 22818; 832; 54732; 10282; 23243; 51164; 1783; 1522; 51399; 1075; 9276; 8655; 3998; 2804; 8729; 11316; 9871; 23423; 829; 10972; 84364; 10342; 10652	137	137
	9.4e-05	0.00089439	Leptin signaling pathway	Wikipathways	WP2034	BCL2L1; SRC; STAT3; STAT1; RAC1; ERBB2; ROCK2; FYN; ROCK1; BAX; MAP2K2; MAP2K1; GRB2; CFL2; EIF4E; NFKB1; IKBKG	1073; 5605; 5604; 6093; 2885; 4790; 8517; 581; 598; 6714; 9475; 5879; 1977; 6774; 6772; 2064; 2534	76	76
	9.4e-05	0.00089439	Prolactin Signaling Pathway	Wikipathways	WP2037	YWHAZ; SRC; STAT3; STAT1; RAC1; ERBB2; YWHAG; FYN; PPIB; MAP2K2; MAP2K1; GRB2; PXN; NFKB1; MAPK9; PAK1; PPIA	5605; 5604; 5601; 5058; 5478; 5479; 5879; 2885; 5829; 7534; 7532; 6714; 4790; 6774; 6772; 2064; 2534	76	76
	9.4e-05	0.00089439	SUMOylation of DNA damage response and repair proteins	Reactome	R-HSA-3108214	UBE2I; SMC1A; SUMO2; NUP107; SUMO1; RPA1; STAG1; NUP93; NUP37; NUP214; NUP155; PML; RAD21; RANBP2; NUP210; NUP205; SP100	7329; 9688; 23165; 7341; 6672; 10274; 5371; 8021; 5903; 23225; 6117; 57122; 6613; 79023; 8243; 9631; 5885	76	76
	9.52e-05	0.000901344	Dual incision in TC-NER	Reactome	R-HSA-6782135	PCNA; POLR2E; AQR; RFC4; RPS27A; RPA1; POLR2G; RPA2; CUL4A; UBA52; UBB; UBC; POLR2L; RFC2; POLR2H; RBX1	9716; 8451; 5434; 5441; 6118; 5111; 7316; 7311; 5982; 6117; 5437; 5984; 9978; 7314; 6233; 5436	69	69
	9.87e-05	0.000930782	IL-3 Signaling Pathway	Wikipathways	WP286	BCL2L1; SRC; IL5RA; STAT3; CRKL; FYN; YWHAQ; PIK3CD; MAP2K1; GRB2; YWHAB; HCK; LYN	5293; 5604; 10971; 4067; 2885; 1399; 598; 6714; 3055; 3568; 6774; 7529; 2534	49	49
	0.000103261	0.000969602	Signaling by WNT	Reactome	R-HSA-195721	HDAC1; PPP3CA; PPP3R1; RPS27A; HIST1H2AK; HIST1H2AJ; HIST1H2AE; HIST1H2AD; HIST1H2AC; HIST1H2AB; YWHAZ; RUVBL1; CSNK2A2; NLK; HIST2H2AA3; HIST2H2AA4; RAC2; RAC3; RAC1; GNB4; PRKCB; GNB1; CAMK2A; TRRAP; GNB2; AP2A1; HIST1H2BA; AP2A2; HIST2H2AC; H2AFV; VPS35; RBX1; H2AFX; H2AFZ; PFN1; UBA52; UBB; UBC; CTBP1; CSNK2B; H2AFJ	8330; 3065; 723790; 2783; 255626; 1460; 8607; 7316; 51701; 3014; 3013; 55766; 5879; 2782; 5216; 9978; 1487; 161; 5881; 5534; 7314; 8335; 3012; 59345; 8338; 1459; 5579; 5530; 8337; 6233; 7311; 5880; 8331; 8295; 160; 55737; 815; 8334; 3015; 94239; 7534	278	276
	0.000104967	0.000977579	Cellular Senescence	Reactome	R-HSA-2559583	MAP4K4; RPS27A; TNIK; HIST1H2AK; HIST1H2AJ; HIST1H2AE; HIST1H2AD; MAPKAPK3; HIST1H2AC; HIST1H2AB; MINK1; NBN; NFKB1; MAPK9; HIST2H2AA4; CDKN2C; HIST2H2AA3; HIST1H2BA; HIST1H1D; HIST1H1E; HIST2H2AC; HIST1H1B; HIST1H1C; H2AFV; LMNB1; H2AFX; H2AFZ; UBA52; UBB; UBC; H2AFJ	255626; 4001; 3007; 723790; 8330; 7316; 50488; 3014; 7314; 4790; 1031; 3006; 3013; 55766; 5601; 4683; 23043; 3009; 8335; 3012; 8338; 9448; 7867; 8337; 7311; 8331; 3008; 8334; 3015; 6233; 94239	189	188
	0.000105022	0.000977579	Ebola Virus Pathway on Host	Wikipathways	WP4217	ACTG1; ITGA3; EGFR; CAV2; IQGAP1; EPS15; STAT1; EIF2S1; PIK3CD; C1QBP; PIK3R3; NFKB1; HLA-DPB1; CTSL; RAC1; CTSB; TBK1; VPS18; EIF2AK2; TOP1; KPNA1; ACTB; CD300A; PAK1	29110; 1956; 5610; 2060; 708; 3675; 57617; 6772; 5879; 8503; 60; 7150; 858; 8826; 1508; 5293; 1514; 3836; 5058; 1965; 71; 11314; 4790; 3115	130	130
	0.000105434	0.000977579	Regulation of p38-alpha and p38-beta	PID	p38alphabetapathway	SRC; RAC1; TAB1; FYN; YES1; HCK; LYN; PAK1; RALA; PAK3	4067; 2534; 3055; 6714; 10454; 5879; 5898; 5063; 7525; 5058	31	31
	0.000106979	0.000983672	PAR1-mediated thrombin signaling events	PID	thrombin_par1_pathway	GNAQ; PRKCB; GNB1; ROCK1; ROCK2; PRKCD; GNA14; DNM1; AKAP13; ARHGDIA; GNA12; GNA13	2776; 9630; 9475; 11214; 396; 1759; 6093; 2782; 10672; 5580; 2768; 5579	44	43
	0.000106979	0.000983672	Formation of Incision Complex in GG-NER	Reactome	R-HSA-5696395	UBE2I; RPS27A; SUMO1; SUMO2; RPA1; RPA2; CUL4A; UBA52; UBB; UBC; RBX1; UBE2V2	7329; 8451; 6118; 7341; 7336; 7316; 7311; 6613; 9978; 7314; 6233; 6117	43	43
	0.000108672	0.000995111	Role of Calcineurin-dependent NFAT signaling in lymphocytes	PID	nfat_3pathway	YWHAZ; BCL2L1; PRKCB; RAN; YWHAQ; PRKCD; BAX; SFN; NUP214; YWHAH; FKBP1A; YWHAB; MAPK9; YWHAG	7532; 5901; 10971; 581; 7534; 5601; 598; 7529; 8021; 2810; 5580; 7533; 5579; 2280	56	56
	0.000111737	0.00101897	Meiosis	Reactome	R-HSA-1500620	SMC1A; H2AFV; RAD21; STAG1; H2AFX; H2AFZ; HIST1H2BA; HIST1H2AC; HIST1H2AK; HIST1H2AJ; HIST1H2AE; HIST1H2AD; HIST2H2AA3; HIST2H2AA4; HIST2H2AC; H2AFJ; HIST1H2AB	3014; 8337; 5885; 723790; 3013; 10274; 8331; 55766; 8335; 3012; 8330; 8334; 3015; 8338; 8243; 94239; 255626	78	77
	0.000114257	0.00103768	Glycolysis	Reactome	R-HSA-70171	PKLR; NUP155; NUP107; HK2; PGK2; HK1; NUP93; NUP37; NUP214; ADPGK; ALDOA; ALDOC; RANBP2; NUP210; NUP205; PGK1	3098; 83440; 9688; 226; 23165; 5313; 230; 5230; 5903; 8021; 23225; 57122; 79023; 3099; 9631; 5232	71	70
	0.000117271	0.0010607	ErbB Signaling Pathway	Wikipathways	WP673	ERBB2; SRC; SOS2; ERBB4; CAMK2D; PIK3CD; PRKCB; EGFR; CAMK2A; PDK1; MAP2K2; MAP2K1; GRB2; PIK3R3; PAK4; CRKL; MAPK9; PAK1; PAK3	10298; 815; 817; 5063; 1956; 6714; 6655; 2064; 2066; 5605; 5604; 5601; 1399; 5579; 8503; 2885; 5293; 5058; 5163	92	92
	0.000125091	0.00112593	HIF-1 signaling pathway - Homo sapiens (human)	KEGG	path:hsa04066	ERBB2; PRKCB; STAT3; MAP2K2; HK2; EGFR; HK1; PIK3CD; CAMK2A; PDK1; CAMK2D; MAP2K1; TFRC; PIK3R3; RBX1; ALDOA; NFKB1; EIF4E; SERPINE1; PGK1	2064; 3098; 3099; 5163; 5230; 6774; 5293; 4790; 226; 9978; 815; 817; 8503; 7037; 1956; 1977; 5054; 5579; 5604; 5605	100	100
	0.000125551	0.00112593	ErbB signaling pathway - Homo sapiens (human)	KEGG	path:hsa04012	ERBB2; SRC; CRKL; ERBB4; CAMK2D; PIK3CD; PRKCB; EGFR; CAMK2A; MAP2K2; MAP2K1; GRB2; PIK3R3; SOS2; PAK4; MAPK9; PAK1; PAK3	5293; 2064; 2066; 5601; 2885; 1956; 815; 817; 8503; 6714; 5058; 5063; 5579; 5604; 10298; 5605; 1399; 6655	85	85
	0.000126336	0.00112593	Hemostasis	Reactome	R-HSA-109582	HDAC1; CAPZB; DOCK8; WDR1; APBB1IP; ATP2A1; EHD1; ATP2A3; GNB4; FAM3C; DOCK7; STIM1; ALDOA; STXBP3; MAFK; ABHD12; STXBP2; S100A10; HSPA5; KIF2A; SERPINE1; MAFF; MAFG; YWHAZ; SERPINA3; MAGED2; RAC1; FYN; C1QBP; THBS1; SPARC; PDPK1; PIK3R3; YES1; MANF; TFPI; TAGLN2; KIF21A; ATP2A2; CDK5; SRC; ANXA2; CD63; CSK; FAM49B; CD44; SRI; GNB1; PRKCD; GNB2; PRKCB; TTN; ITGA3; PRKAR1A; PRKAR1B; TEX264; CFL1; …	10447; 829; 2783; 55605; 832; 6281; 6714; 51368; 10672; 5216; 3799; 12; 391; 2885; 7975; 8503; 5004; 960; 7035; 489; 3065; 6717; 10938; 2534; 81704; 708; 23764; 7057; 2768; 135228; 302; 9630; 8407; 5579; 89953; 26090; 967; 492; 6814; 7873; 5054; 1020; 5580; 3831; 3796; 5478; 51571; 5573; 5879; 2782; 5005; 3675; 10916; 6786; 1445; 487; 5880; 3798; 5575; 4097; 4067; 2776; 6813; 1072; 3309; 488; 230…	668	667
	0.000126514	0.00112593	links between pyk2 and map kinases	BioCarta	pyk2pathway	SRC; GNAQ; CRKL; RAC1; PRKCB; MAP2K2; MAP2K1; GRB2; PAK1	2776; 6714; 2885; 1399; 5605; 5879; 5604; 5579; 5058	26	26
	0.000132424	0.00116913	guanosine nucleotides <i>de novo</i> biosynthesis	HumanCyc	PWY-7228	NME1; NME2; NME3; NME1-NME2; IMPDH1; IMPDH2; GMPS	4832; 8833; 4830; 3614; 654364; 4831; 3615	16	16
	0.000132424	0.00116913	MAP3K8 (TPL2)-dependent MAPK1/3 activation	Reactome	R-HSA-5684264	RPS27A; UBA52; MAP2K1; IKBKG; UBB; UBC; NFKB1	7316; 5604; 7311; 7314; 6233; 8517; 4790	16	16
	0.000136594	0.00120116	CDC42 signaling events	PID	cdc42_pathway	SRC; CFL1; ARPC1B; ARHGEF6; ARPC2; LIMK1; ARPC5; ARPC4; RAC1; ARHGDIA; PAK4; MAPK9; ACTR3; IQGAP1; YES1; PAK1	10092; 10096; 10109; 10095; 6714; 396; 9459; 3984; 5879; 5601; 1072; 10298; 8826; 10093; 7525; 5058	71	71
	0.000139718	0.00122377	p38 signaling mediated by MAPKAP kinases	PID	p38_mk2pathway	YWHAZ; HSPB1; YWHAQ; SFN; YWHAH; YWHAB; MAPKAPK3; YWHAG	7534; 7533; 2810; 7532; 7867; 3315; 10971; 7529	21	21
	0.000144003	0.00125142	Signaling events mediated by HDAC Class II	PID	hdac_classii_pathway	UBE2I; NR3C1; SUMO1; GNB1; RANGAP1; RAN; NUP214; YWHAB; HSP90AA1; NUP210; RANBP2	7329; 2908; 5905; 7341; 3320; 5901; 5903; 23225; 2782; 7529; 8021	38	38
	0.000144003	0.00125142	tRNA charging	HumanCyc	TRNA-CHARGING-PWY	LARS; KARS; IARS; TARS2; VARS; AARS; WARS; RARS; YARS; SARS; GARS	8565; 7407; 16; 7453; 51520; 2617; 80222; 3376; 3735; 5917; 6301	38	38
	0.000153798	0.00133131	Pyrimidine nucleotides nucleosides metabolism	INOH	None	PRPS2; NME1; NME2; DPYD; NME1-NME2; NT5C; NME3; CPS1; TYMP; DTYMK; CAD; DCK; CTPS2	56474; 1890; 4831; 1633; 1841; 4830; 654364; 1806; 4832; 5634; 30833; 790; 1373	51	51
	0.000156144	0.00133596	EPH-ephrin mediated repulsion of cells	Reactome	R-HSA-3928665	SRC; LYN; FYN; YES1; RAC1	4067; 6714; 2534; 7525; 5879	8	8
	0.000156144	0.00133596	Downregulation of ERBB4 signaling	Reactome	R-HSA-1253288	UBA52; RPS27A; ERBB4; UBB; UBC	7316; 7311; 7314; 2066; 6233	8	8
	0.000156144	0.00133596	HuR (ELAVL1) binds and stabilizes mRNA	Reactome	R-HSA-450520	NUP214; SET; ELAVL1; ANP32A; PRKCD	8021; 1994; 5580; 6418; 8125	8	8
	0.000158136	0.00134781	JAK STAT pathway and regulation	INOH	None	PDGFRA; PSMB10; PSMD4; EGFR; MAP2K2; MAP2K1; IKBKG; MAPKAPK3; STAT3; STAT1; FYN; PSMA1; PSMA7; PSMA5; PSMC1; NLK; MAPK9; PSMC4; IL16; SRC; IL5RA; CSK; PRKAB1; CAMK2D; PRKCB; CAMK2A; TXLNA; PRKCD; PRKAR1A; PRKAR1B; IL18; PSMC3; SOS2; RPS6KA6; PSMD10; PSMD13; KIT; MET; GRB2; CDK5; PAK4; PDPK1; PSMB4; PAK1	5704; 1956; 1020; 5702; 2885; 5605; 815; 5580; 5682; 4233; 51701; 3815; 200081; 5686; 6772; 6714; 5573; 817; 5601; 5700; 6655; 5604; 5692; 2534; 5058; 5716; 5710; 6774; 8517; 5688; 10298; 5564; 5579; 3606; 7867; 5170; 1445; 3568; 5719; 5156; 5699; 5575; 27330; 3603	310	309
	0.000163034	0.00138423	Signaling by BRAF and RAF fusions	Reactome	R-HSA-6802952	SRC; QKI; AGK; CSK; FXR1; AKAP9; MAP2K2; MAP2K1; ZC3HAV1; SND1; MARK3; YWHAB; APBB1IP; IQGAP1	10142; 1445; 56829; 9444; 6714; 27044; 55750; 5605; 4140; 54518; 8087; 7529; 8826; 5604	58	58
	0.00016666	0.00140962	pyrimidine deoxyribonucleotide phosphorylation	HumanCyc	PWY-7197	NME1; NME2; NME3; NME1-NME2; CMPK2; DTYMK	4832; 4830; 129607; 1841; 654364; 4831	12	12
	0.00017097	0.00144057	B cell receptor signaling	INOH	None	PSMB10; PSMD4; MAP2K2; MAP2K1; IKBKG; FYN; PIK3CD; PSMA1; PSMA7; PSMA5; PSMC1; PSMC3; PSMC4; SRC; PRKCB; NFKB1; UBE2V1; TMEM189-UBE2V1; SOS2; TAB1; PSMD10; PSMD13; GRB2; PSMB4	5702; 2534; 8517; 5605; 5704; 5710; 4790; 5700; 6655; 5604; 5692; 387522; 5716; 5686; 2885; 5688; 5579; 5682; 5719; 5293; 10454; 7335; 5699; 6714	134	134
	0.00017625	0.00147944	thrombin signaling and protease-activated receptors	BioCarta	par1pathway	GNAQ; PRKCB; GNB1; ROCK1; GNA12; ARFGEF1; ARFGEF2; GBF1; GNA13	2776; 8729; 10565; 6093; 10564; 2782; 10672; 2768; 5579	27	27
	0.000184949	0.00154659	NOD-like receptor signaling pathway - Homo sapiens (human)	KEGG	path:hsa04621	BCL2L1; NAMPT; IKBKG; VDAC3; STAT1; GABARAPL2; ATG16L1; GSDMD; IFI16; HSP90AB1; CARD9; PYCARD; MYD88; CTSB; GBP2; GBP1; CARD16; PRKCD; ATG12; NFKB1; IL18; MAPK9; TBK1; CASP1; TAB1; CASP8; RBCK1; HSP90AA1	4615; 3606; 9140; 11345; 598; 6772; 64170; 4790; 10616; 10454; 2633; 7419; 3326; 55054; 2634; 834; 8517; 3428; 114769; 10135; 79792; 29108; 29110; 841; 5580; 3320; 5601; 1508	168	168
	0.000189554	0.00156588	N-glycan trimming in the ER and Calnexin/Calreticulin cycle	Reactome	R-HSA-532668	GANAB; CALR; RPS27A; PDIA3; UBA52; UBB; UBC; PSMC1; UBXN1; UGGT1	2923; 56886; 51035; 23193; 7316; 7311; 5700; 811; 7314; 6233	34	33
	0.000189554	0.00156588	CD28 co-stimulation	Reactome	R-HSA-389356	SRC; RAC1; FYN; GRB2; PIK3R3; PDPK1; LYN; PAK1; YES1; PAK3	4067; 5170; 6714; 2534; 2885; 5879; 7525; 5063; 8503; 5058	33	33
	0.000189554	0.00156588	Netrin-mediated signaling events	PID	netrin_pathway	SRC; MAP1B; RAC1; FYN; CAMK2A; PAK1; MAP2K2; MAP2K1; ELMO1; YES1	9844; 5879; 6714; 4131; 5605; 815; 5604; 7525; 2534; 5058	33	33
	0.000190082	0.00156588	mRNA Splicing - Minor Pathway	Reactome	R-HSA-72165	EFTUD2; SNRPD3; NCBP2; SRSF2; SF3B5; GTF2F2; LSM2; SF3B2; POLR2E; POLR2G; POLR2L; YBX1; POLR2H	5441; 22916; 10992; 6427; 5434; 83443; 57819; 6634; 4904; 2963; 9343; 5437; 5436	52	52
	0.000192338	0.0015786	Pyrimidine metabolism	EHMN	Pyrimidine metabolism	NME1-NME2; POLG; SLC25A19; DCK; NT5C; COPE; NUP214; NUP210; RANBP2; PUS1; NUP107; NUP93; POLR2E; POLR2G; POLR2L; POLR2H; NME1; NME2; NUP37; AK4; TYMP; NUP155; COPB2; NUP205	5437; 4831; 23225; 57122; 9631; 30833; 60386; 5903; 205; 4830; 5428; 79023; 9276; 9688; 23165; 1890; 80324; 654364; 8021; 5434; 5441; 1633; 11316; 5436	136	135
	0.000198077	0.00161014	VEGF signaling pathway - Homo sapiens (human)	KEGG	path:hsa04370	SRC; RAC2; RAC3; PPP3R1; HSPB1; PRKCB; PIK3CD; MAP2K2; MAP2K1; PIK3R3; PXN; RAC1; PPP3CA; MAPKAPK3	7867; 5530; 5534; 3315; 8503; 6714; 5829; 5579; 5604; 5605; 5293; 5879; 5880; 5881	59	59
	0.000198077	0.00161014	purine nucleotides <i>de novo</i> biosynthesis	HumanCyc	PWY-841	ATP6V1F; ADSS; NME2; NME3; NME1-NME2; IMPDH1; IMPDH2; AK4; PPAT; AK2; ATP6V0D1; GMPS; ATP6V1C1; NME1	9114; 654364; 528; 5471; 4831; 159; 205; 4830; 4832; 8833; 204; 3614; 9296; 3615	59	59
	0.000198361	0.00161014	DNA methylation	Reactome	R-HSA-5334118	H2AFV; H2AFX; H2AFZ; HIST2H2AC; HIST1H2BA; HIST1H2AC; HIST1H2AK; HIST1H2AJ; HIST1H2AE; HIST1H2AD; HIST2H2AA3; HIST2H2AA4; UHRF1; H2AFJ; HIST1H2AB	3014; 8337; 723790; 3013; 8331; 55766; 8335; 3012; 8330; 29128; 8334; 3015; 8338; 94239; 255626	67	66
	0.000209456	0.00168172	endocytotic role of ndk phosphins and dynamin	BioCarta	ndkdynaminpathway	EPS15; NME1; NME2; NME1-NME2; DNM1; AP2A1; PPP3CA	160; 5530; 2060; 4830; 4831; 654364; 1759	17	17
	0.000209456	0.00168172	superpathway of pyrimidine deoxyribonucleoside salvage	HumanCyc	PWY-7200	DCK; NME2; NME3; NME1-NME2; CMPK2; DTYMK; NME1	4832; 1633; 4830; 129607; 4831; 1841; 654364	17	17
	0.000209456	0.00168172	role of pi3k subunit p85 in regulation of actin organization and cell migration	BioCarta	cdc42racpathway	PDGFRA; RAC1; ARPC2; ARPC4; ARPC1B; ACTR3; PAK1	10109; 10093; 5156; 10096; 5879; 5058; 10095	17	17
	0.000215057	0.00171426	Transcription-Coupled Nucleotide Excision Repair (TC-NER)	Reactome	R-HSA-6781827	PCNA; POLR2E; AQR; RFC4; RPS27A; RPA1; POLR2G; RPA2; CUL4A; UBA52; UBB; UBC; POLR2L; RFC2; COPS7B; POLR2H; RBX1	6117; 9716; 8451; 5437; 5434; 5441; 6118; 5111; 7316; 7311; 64708; 5982; 5984; 9978; 7314; 6233; 5436	81	81
	0.000215057	0.00171426	Amyloid fiber formation	Reactome	R-HSA-977225	RPS27A; UBB; HIST1H2AJ; H2AFX; H2AFZ; UBA52; GGA2; HIST1H2BA; HIST1H2AK; UBC; HIST1H2AE; HIST1H2AD; HIST2H2AA3; HIST2H2AA4; HIST2H2AC; HIST1H2AC; HIST1H2AB	8335; 3014; 8338; 8337; 7316; 7311; 723790; 3012; 3013; 8330; 8331; 8334; 3015; 7314; 6233; 255626; 23062	82	81
	0.000228186	0.0018124	Transcriptional regulation by RUNX1	Reactome	R-HSA-8878171	HDAC1; RPS27A; HIST1H2AK; HIST1H2AJ; HIST1H2AE; HIST1H2AD; HIST1H2AC; HIST1H2AB; THBS1; CBFB; PML; HIST2H2AA3; HIST2H2AA4; SRC; PRKCB; CTSL; UBB; PRMT1; SMARCD3; HIST1H2BA; HIST2H2AC; CSNK2A2; H2AFV; H2AFX; H2AFZ; UBA52; ACTL6A; ACTL6B; UBC; CSNK2B; H2AFJ	255626; 86; 5371; 7316; 8330; 3065; 1460; 6604; 51412; 3014; 8338; 7057; 6714; 3013; 55766; 723790; 5579; 7314; 8335; 865; 3012; 3276; 1459; 8337; 7311; 1514; 8331; 8334; 3015; 6233; 94239	198	196
	0.000238107	0.00188445	CLEC7A (Dectin-1) signaling	Reactome	R-HSA-5607764	SRC; AHCYL1; PPP3R1; TAB1; PRKCD; CASP8; PYCARD; CARD9; IKBKG; NFKB1; PPP3CA	5530; 5534; 4790; 6714; 10768; 8517; 10454; 841; 29108; 5580; 64170	40	40
	0.000239419	0.00188808	Interleukin-1 signaling	Reactome	R-HSA-9020702	TOLLIP; RBX1; TAB1; RPS27A; UBA52; MAP2K1; TMEM189-UBE2V1; IKBKG; UBB; UBC; NFKB1; MYD88; HMGB1; UBE2V1	3146; 5604; 4790; 4615; 8517; 10454; 7316; 7311; 7335; 54472; 9978; 7314; 6233; 387522	60	60
	0.000241248	0.00189577	role of erbb2 in signal transduction and oncology	BioCarta	her2pathway	ERBB2; STAT3; ERBB4; EGFR; CARM1; MAP2K2; MAP2K1; GRB2; PDPK1	5170; 1956; 2885; 2064; 10498; 5605; 6774; 2066; 5604	28	28
	0.000243205	0.00190439	Chaperonin-mediated protein folding	Reactome	R-HSA-390466	PFDN2; STAT3; FBXO6; PFDN6; CCT2; GNB4; NOP56; GNB1; CCT7; VBP1; GNB2; TUBAL3; ARFGEF2; XRN2; ACTB; TUBB1; CSNK2B; CSNK2A2; CCT6B	26270; 10574; 2783; 1460; 22803; 10576; 10471; 81027; 5202; 10693; 2782; 10564; 60; 79861; 10528; 7411; 59345; 1459; 6774	97	97
	0.000249263	0.00193813	Nuclear import of Rev protein	Reactome	R-HSA-180746	RCC1; NUP107; RAN; NUP93; NUP37; NUP155; NUP214; NUP210; NUP205; RANBP2	5901; 9688; 23165; 5903; 23225; 57122; 8021; 79023; 1104; 9631	34	34
	0.000249263	0.00193813	Interconversion of nucleotide di- and triphosphates	Reactome	R-HSA-499943	CTPS2; NME2; NME3; NME1-NME2; AK2; TAF9; AK4; DTYMK; GLRX; NME1	56474; 1841; 4831; 4832; 205; 2745; 4830; 654364; 6880; 204	34	34
	0.000250977	0.00194463	Toll-Like Receptors Cascades	Reactome	R-HSA-168898	HMGB1; RPS27A; HSP90B1; MAP2K1; DNM1; IKBKG; DNM3; MAPKAPK3; TBK1; EEA1; CD14; CNPY3; NFKB1; MAPK9; CTSL; CTSB; LY96; UBE2V1; MYD88; TAB1; CASP8; UBA52; TMEM189-UBE2V1; UBB; UBC; TLR8	929; 51311; 1759; 10454; 841; 4790; 8411; 4615; 7184; 5601; 5604; 387522; 23643; 8517; 7311; 26052; 7314; 7867; 3146; 29110; 1508; 1514; 7316; 7335; 10695; 6233	154	154
	0.000274417	0.00211884	Focal Adhesion	Wikipathways	WP306	PDGFRA; ACTG1; CRKL; FYN; ITGA3; EGFR; MAP2K1; CAV2; PIK3CD; THBS3; THBS1; PIK3R3; PXN; MAPK9; ERBB2; SRC; RAC2; RAC3; RAC1; PRKCB; HCK; ROCK1; ROCK2; MET; GRB2; SPP1; PAK4; PDPK1; ACTB; PAK1; PAK3	5170; 10298; 9475; 6714; 7059; 5829; 7057; 6093; 4233; 2064; 5156; 5604; 5601; 3675; 1399; 5579; 5879; 8503; 60; 2885; 5293; 6696; 5881; 5880; 5058; 5063; 858; 71; 3055; 1956; 2534	198	198
	0.000281443	0.00216555	Signaling events mediated by VEGFR1 and VEGFR2	PID	vegfr1_2_pathway	SRC; MAP2K2; PRKCD; PRKCB; FYN; ROCK1; IQGAP1; HSP90AB1; CAMKK2; MAP2K1; GRB2; PXN; PDPK1; HSP90AA1; MYOF	3320; 5170; 26509; 10645; 6714; 2885; 3326; 5605; 6093; 5829; 8826; 5580; 5604; 5579; 2534	68	68
	0.000287964	0.0021735	Signaling by MET	Reactome	R-HSA-6806834	SRC; RPS27A; STAT3; CRKL; EPS15; STAM2; ITGA3; MET; UBA52; GRB2; UBB; UBC; SH3GL1; SH3GL2	6714; 3675; 1399; 7316; 7311; 2885; 6774; 10254; 6456; 7314; 6233; 2060; 6455; 4233	61	61
	0.000288361	0.0021735	Activation of DNA fragmentation factor	Reactome	R-HSA-211227	HMGB1; KPNA1; HIST1H1D; HIST1H1E; HIST1H1B; HIST1H1C	3008; 3009; 3006; 3007; 3146; 3836	13	13
	0.000288361	0.0021735	Apoptosis induced DNA fragmentation	Reactome	R-HSA-140342	HMGB1; KPNA1; HIST1H1D; HIST1H1E; HIST1H1B; HIST1H1C	3008; 3009; 3006; 3007; 3146; 3836	13	13
	0.000288361	0.0021735	UTP and CTP <i>de novo</i> biosynthesis	HumanCyc	PWY-7176	CTPS2; NME2; NME3; NME1-NME2; CMPK2; NME1	4832; 56474; 4830; 129607; 654364; 4831	13	13
	0.000288361	0.0021735	Regulation of RUNX3 expression and activity	Reactome	R-HSA-8941858	SRC; RPS27A; UBA52; CBFB; UBB; UBC	7316; 7311; 6714; 865; 7314; 6233	13	13
	0.000288361	0.0021735	Chk1/Chk2(Cds1) mediated inactivation of Cyclin B:Cdk1 complex	Reactome	R-HSA-75035	YWHAZ; YWHAQ; SFN; YWHAH; YWHAB; YWHAG	7534; 2810; 7532; 7533; 10971; 7529	13	13
	0.000290882	0.00217768	ccr3 signaling in eosinophils	BioCarta	ccr3pathway	PRKCB; GNAQ; GNAS; LIMK1; GNB1; ROCK2; MAP2K1; CFL1	2776; 2778; 3984; 9475; 2782; 1072; 5604; 5579	23	23
	0.000290882	0.00217768	Abortive elongation of HIV-1 transcript in the absence of Tat	Reactome	R-HSA-167242	NCBP2; NELFCD; GTF2F2; CTDP1; POLR2E; POLR2G; POLR2L; POLR2H	22916; 51497; 5434; 5441; 9150; 2963; 5437; 5436	23	23
	0.000292559	0.00218286	COPI-mediated anterograde transport	Reactome	R-HSA-6807878	COPZ1; CAPZB; CAPZA1; DYNLL1; COPE; BET1; YKT6; NAPG; ARFGAP2; GOLGB1; TMED9; DYNC1LI2; TMED3; COPB2; GBF1; DCTN4; TMED10	8655; 8774; 51164; 2804; 8729; 1783; 832; 9276; 23423; 10652; 829; 22818; 54732; 84364; 10972; 10282; 11316	83	83
	0.000300518	0.00223472	Focal adhesion - Homo sapiens (human)	KEGG	path:hsa04510	PDGFRA; ACTG1; CRKL; FYN; ITGA3; EGFR; MAP2K1; CAV2; PIK3CD; THBS3; THBS1; PIK3R3; PXN; MAPK9; ERBB2; SRC; RAC2; RAC3; RAC1; PRKCB; SOS2; ROCK1; ROCK2; MET; GRB2; SPP1; PAK4; PDPK1; ACTB; PAK1; PAK3	2064; 10298; 5156; 6696; 2534; 5170; 6714; 60; 3675; 4233; 5293; 5829; 5879; 5880; 5881; 9475; 8503; 858; 1399; 7057; 7059; 2885; 1956; 71; 5058; 5063; 5579; 6093; 5601; 5604; 6655	199	199
	0.000301916	0.00223761	Dual Incision in GG-NER	Reactome	R-HSA-5696400	PCNA; RFC4; RPS27A; RPA1; RFC2; CUL4A; UBA52; UBB; UBC; RBX1; RPA2	8451; 6118; 5111; 7316; 7311; 5982; 6117; 5984; 9978; 7314; 6233	41	41
	0.000309511	0.00228625	RNA Polymerase I Chain Elongation	Reactome	R-HSA-73777	H2AFV; HIST1H2AC; CBX3; HIST1H2AJ; H2AFX; H2AFZ; HIST2H2AC; POLR2E; HIST1H2BA; HIST1H2AK; POLR2L; HIST1H2AE; HIST1H2AD; HIST2H2AA3; HIST2H2AA4; POLR2H; H2AFJ; HIST1H2AB	8330; 723790; 255626; 3014; 3013; 55766; 8335; 3012; 5437; 11335; 8338; 8337; 5434; 5441; 8331; 8334; 3015; 94239	92	91
	0.000314901	0.00231834	Condensation of Prophase Chromosomes	Reactome	R-HSA-2299718	H2AFV; SET; H2AFX; SMC4; H2AFZ; HIST1H2BA; HIST1H2AC; HIST1H2AK; HIST1H2AJ; HIST1H2AE; HIST1H2AD; HIST2H2AA3; HIST2H2AA4; HIST2H2AC; H2AFJ; HIST1H2AB	3014; 8338; 8337; 723790; 3013; 8331; 55766; 8335; 3012; 8330; 10051; 8334; 3015; 6418; 94239; 255626	77	76
	0.000323946	0.00236678	angiotensin ii mediated activation of jnk pathway via pyk2 dependent signaling	BioCarta	at1rpathway	SRC; GNAQ; CRKL; RAC1; PRKCB; EGFR; MAP2K2; MAP2K1; GRB2; PAK1	2776; 6714; 1956; 2885; 1399; 5605; 5879; 5604; 5579; 5058	35	35
	0.000324574	0.00236678	Chemokine signaling pathway	Wikipathways	WP3929	CRKL; MAP2K1; IKBKG; STAT3; STAT1; PIK3CD; PIK3R3; PXN; NFKB1; LYN; RAC2; CSK; RAC1; GNB4; PRKCB; GNB1; PRKCD; GNB2; HCK; CXCL13; PARD3; SOS2; ROCK1; ROCK2; ELMO1; GRB2; PAK1	5604; 9475; 5580; 5829; 6093; 6655; 8517; 2783; 2782; 1399; 9844; 5579; 6774; 2885; 6772; 8503; 56288; 4067; 10563; 5880; 5293; 5058; 59345; 1445; 3055; 4790; 5879	165	165
	0.000324931	0.00236678	Downregulation of ERBB2 signaling	Reactome	R-HSA-8863795	ERBB2; ERBB4; RPS27A; EGFR; UBA52; CUL5; UBB; UBC; HSP90AA1	2066; 3320; 1956; 2064; 7316; 7311; 8065; 7314; 6233	29	29
	0.000327888	0.00236678	Ethanol metabolism resulting in production of ROS by CYP2E1	Wikipathways	WP4269	MAP2K2; MAP2K1; MAFK; MAFF; MAFG	4097; 23764; 5605; 5604; 7975	9	9
	0.000327888	0.00236678	Regulation of PTEN localization	Reactome	R-HSA-8948747	PML; UBA52; RPS27A; UBB; UBC	7316; 7311; 5371; 7314; 6233	9	9
	0.000327888	0.00236678	Sulfur metabolism - Homo sapiens (human)	KEGG	path:hsa00920	MPST; PAPSS2; BPNT1; TST; ETHE1	9060; 10380; 23474; 4357; 7263	9	9
	0.000333182	0.00238325	IL5	NetPath	Pathway_IL5	YWHAZ; IL5RA; STAT3; CRKL; STAT1; PRKCD; BAX; MAP2K2; GRB2; HCK; NFKB1; LYN	4067; 3568; 4790; 6772; 581; 3055; 2885; 1399; 7534; 5605; 6774; 5580	48	48
	0.000333397	0.00238325	MAPK family signaling cascades	Reactome	R-HSA-5683057	PDGFRA; APBB1IP; RPS27A; EGFR; MAP2K2; MAP2K1; IQGAP1; ERBB4; NEFL; DNAJB1; RAC1; FYN; PEA15; MARK3; YWHAB; ERBB2; SRC; IL5RA; CSK; HSPB1; CAMK2D; UBC; CAMK2A; IGF2BP1; PPP5C; AKAP9; KIT; MET; UBA52; GRB2; UBB; PHB; RBX1; PAK1; PAK3	2064; 815; 54518; 5605; 7529; 10642; 4233; 5536; 6714; 3337; 817; 5879; 4140; 5604; 9978; 2534; 5058; 10142; 5245; 1956; 3315; 2885; 7311; 3815; 8826; 7314; 1445; 3568; 8682; 6233; 5156; 4747; 7316; 5063; 2066	237	236
	0.000333397	0.00238325	VEGFA-VEGFR2 Signaling Pathway	Wikipathways	WP3888	BCL2L1; HDAC1; PPP3CA; LIMK1; MAP2K2; MAP2K1; ROCK2; NDRG1; IQGAP1; EPS15; STAT3; STAT1; PFN1; EEA1; HSPB1; FYN; PXN; ICAM1; NFKB1; MAPK9; SRC; CSK; RAC1; PRKCB; PRKCD; CFL1; PDPK1; EIF4E; ROCK1; EIF2A; CAMKK2; GRB2; NCL; HSP90AA1; PAK1	5170; 10397; 9475; 3320; 6714; 5580; 5829; 4790; 6093; 598; 5605; 5604; 3383; 83939; 2060; 3315; 5579; 6774; 2885; 6772; 5879; 1072; 8826; 10645; 5601; 5216; 5058; 3065; 4691; 1445; 5530; 8411; 1977; 3984; 2534	236	236
	0.000344709	0.00245619	Leptin	NetPath	Pathway_Leptin	ERBB2; SRC; STAT3; GNAQ; STAT1; FYN; LIMK1; EGFR; PRKCD; GRB2; IKBKG; CDK5; EIF4E; CFL2	2776; 6772; 2534; 8517; 1956; 2885; 3984; 1073; 1020; 6714; 1977; 2064; 6774; 5580	62	62
	0.000356272	0.00251432	Beta-catenin independent WNT signaling	Reactome	R-HSA-3858494	RPS27A; RAC2; RAC3; PPP3R1; RAC1; GNB4; PRKCB; GNB1; CAMK2A; GNB2; PFN1; UBA52; AP2A1; UBB; AP2A2; PPP3CA; NLK; UBC	2783; 815; 51701; 5879; 2782; 5216; 161; 5881; 5534; 7311; 59345; 7314; 5579; 5530; 6233; 160; 5880; 7316	92	92
	0.000356272	0.00251432	VEGFA-VEGFR2 Pathway	Reactome	R-HSA-4420097	ROCK1; SRC; PRKCB; AHCYL1; WASF2; RAC1; ABI2; ABI1; FYN; PRKCD; ROCK2; PAK1; PXN; PDPK1; HSP90AA1; MAPKAPK3; ELMO1; PAK3	3320; 9475; 2534; 5580; 10006; 9844; 6714; 10768; 5879; 5058; 10163; 5579; 7867; 5170; 5829; 10152; 6093; 5063	92	92
	0.000356272	0.00251432	RUNX1 regulates genes involved in megakaryocyte differentiation and platelet function	Reactome	R-HSA-8936459	HDAC1; H2AFV; HIST1H2AC; PRMT1; H2AFX; H2AFZ; THBS1; CBFB; HIST1H2BA; HIST1H2AK; HIST1H2AJ; HIST1H2AE; HIST1H2AD; HIST2H2AA3; HIST2H2AA4; HIST2H2AC; H2AFJ; HIST1H2AB	255626; 3065; 723790; 8330; 3014; 7057; 3013; 55766; 8335; 865; 3012; 3276; 8338; 8337; 8331; 8334; 3015; 94239	94	92
	0.00036819	0.00259019	Interleukin-1 family signaling	Reactome	R-HSA-446652	IL18; TOLLIP; CASP1; RBX1; HMGB1; RPS27A; UBA52; MAP2K1; TMEM189-UBE2V1; IKBKG; UBB; UBC; NFKB1; MYD88; TAB1; UBE2V1	834; 3146; 4790; 5604; 4615; 8517; 10454; 7316; 7311; 7335; 54472; 9978; 7314; 6233; 3606; 387522	77	77
	0.000405628	0.00283556	ER-Phagosome pathway	Reactome	R-HSA-1236974	TAP1; CALR; CD14; IKBKG; LY96; SEC61G; MYD88; SEC61B	929; 23480; 23643; 4615; 6890; 8517; 811; 10952	24	24
	0.000405628	0.00283556	Calnexin/calreticulin cycle	Reactome	R-HSA-901042	GANAB; CALR; RPS27A; PDIA3; UBA52; UBB; UBC; UGGT1	2923; 56886; 23193; 7316; 7311; 811; 7314; 6233	25	24
	0.000416881	0.00289972	Integrin-mediated Cell Adhesion	Wikipathways	WP185	SRC; CAPNS1; RAC3; CSK; RAC1; ITGA3; FYN; ROCK1; ROCK2; RAC2; MAP2K2; MAP2K1; GRB2; PXN; PAK4; PDPK1; CAV2; PAK1; PAK3	5170; 10298; 9475; 6093; 5829; 5063; 6714; 5605; 5604; 3675; 826; 5879; 2885; 858; 5881; 5880; 5058; 1445; 2534	101	101
	0.000417424	0.00289972	EPO signaling	INOH	None	PDGFRA; PIK3CD; EGFR; MAP2K2; MAP2K1; IKBKG; MAPKAPK3; STAT3; STAT1; YWHAQ; FYN; NLK; MAPK9; SRC; CSK; PRKAB1; CAMK2D; PRKCB; PRKCD; CAMK2A; PRKAR1A; PRKAR1B; RPS6KA6; KIT; MET; CDK5; PAK4; PDPK1; PAK1	1956; 1020; 5605; 815; 5580; 4233; 51701; 3815; 6772; 6714; 10971; 5573; 817; 5601; 5604; 2534; 5058; 6774; 8517; 10298; 5564; 5579; 7867; 5170; 1445; 5293; 5156; 5575; 27330	186	185
	0.000429068	0.00295836	ERCC6 (CSB) and EHMT2 (G9a) positively regulate rRNA expression	Reactome	R-HSA-427389	HDAC1; H2AFV; CBX3; H2AFX; H2AFZ; HIST1H2BA; HIST1H2AC; HIST1H2AK; HIST1H2AJ; HIST1H2AE; HIST1H2AD; HIST2H2AA3; HIST2H2AA4; HIST2H2AC; H2AFJ; HIST1H2AB	3014; 3015; 8337; 723790; 3013; 8331; 55766; 8335; 3012; 8330; 3065; 8334; 11335; 8338; 94239; 255626	79	78
	0.000431206	0.00295836	fmlp induced chemokine gene expression in hmc-1 cells	BioCarta	fmlppathway	PRKCB; RAC1; FPR1; CAMKK2; GNB1; MAP2K2; MAP2K1; PPP3CA; PAK1	5530; 10645; 5879; 2357; 2782; 5605; 5604; 5579; 5058	30	30
	0.000431206	0.00295836	NEP/NS2 Interacts with the Cellular Export Machinery	Reactome	R-HSA-168333	NUP107; RAN; NUP93; NUP37; NUP155; NUP214; NUP210; NUP205; RANBP2	5901; 9688; 23165; 5903; 23225; 57122; 8021; 79023; 9631	30	30
	0.000431206	0.00295836	Transport of Ribonucleoproteins into the Host Nucleus	Reactome	R-HSA-168271	NUP155; NUP107; NUP93; NUP37; KPNA1; NUP214; NUP210; NUP205; RANBP2	9688; 23165; 3836; 5903; 23225; 57122; 8021; 79023; 9631	30	30
	0.000444125	0.0030376	Phagosome - Homo sapiens (human)	KEGG	path:hsa04145	TAP1; ATP6V1F; ACTG1; CORO1A; MARCO; EEA1; ATP6AP1; THBS3; THBS1; TFRC; ATP6V0D1; HLA-DPB1; CTSL; RAC1; TUBB1; DYNC1LI2; SEC61G; SEC61B; ACTB; TUBAL3; CALR; TUBB; CD14; ATP6V1C2; ATP6V1C1	528; 537; 3115; 60; 71; 6890; 9296; 81027; 10952; 245973; 8411; 1783; 811; 929; 203068; 7037; 11151; 7057; 7059; 9114; 1514; 23480; 5879; 8685; 79861	152	151
	0.000470203	0.00319623	sumoylation by ranbp2 regulates transcriptional repression	BioCarta	ranbp2pathway	HDAC1; RAN; SUMO1; NUP214; NUP210; RANBP2	5901; 5903; 7341; 3065; 8021; 23225	14	14
	0.000470203	0.00319623	Spry regulation of FGF signaling	Reactome	R-HSA-1295596	SRC; RPS27A; UBA52; GRB2; UBB; UBC	7316; 7311; 6714; 7314; 6233; 2885	14	14
	0.000473221	0.00320425	IL-6 signaling pathway	Wikipathways	WP364	HDAC1; BCL2L1; STAT3; STAT1; RAC1; PRKCD; MAP2K2; MAP2K1; GRB2; HCK; NLK	5605; 5604; 3065; 5580; 2885; 598; 3055; 51701; 6774; 6772; 5879	43	43
	0.000474275	0.00320425	Toll-like Receptor Signaling Pathway	Wikipathways	WP75	TOLLIP; STAT1; MYD88; IRF5; TBK1; RAC1; TAB1; PIK3CD; CD14; CASP8; MAP2K2; MAP2K1; PIK3R3; IKBKG; NFKB1; LY96; SPP1; TLR8; MAPK9	10454; 29110; 929; 8517; 5605; 5604; 5601; 3663; 841; 6772; 5879; 8503; 23643; 6696; 5293; 54472; 4615; 4790; 51311	102	102
	0.000487292	0.00326235	Semaphorin interactions	Reactome	R-HSA-373755	ERBB2; DPYSL3; RAC1; LIMK1; FYN; ROCK1; ROCK2; HSP90AB1; MET; CDK5; CFL1; HSP90AA1; PAK1; PAK3	1809; 3320; 3984; 1020; 2064; 5879; 9475; 6093; 1072; 5063; 3326; 2534; 5058; 4233	64	64
	0.000487292	0.00326235	RNA Polymerase I Promoter Opening	Reactome	R-HSA-73728	H2AFV; H2AFX; H2AFZ; HIST1H2BA; HIST1H2AC; HIST1H2AK; HIST1H2AJ; HIST1H2AE; HIST1H2AD; HIST2H2AA3; HIST2H2AA4; HIST2H2AC; H2AFJ; HIST1H2AB	3014; 8337; 723790; 3013; 8331; 55766; 94239; 8335; 3012; 8330; 8334; 3015; 8338; 255626	65	64
	0.000487292	0.00326235	Meiotic recombination	Reactome	R-HSA-912446	H2AFV; H2AFX; H2AFZ; HIST1H2BA; HIST1H2AC; HIST1H2AK; HIST1H2AJ; HIST1H2AE; HIST1H2AD; HIST2H2AA3; HIST2H2AA4; HIST2H2AC; H2AFJ; HIST1H2AB	3014; 8337; 723790; 3013; 8331; 55766; 94239; 8335; 3012; 8330; 8334; 3015; 8338; 255626	65	64
	0.000501836	0.0033496	tRNA processing in the nucleus	Reactome	R-HSA-6784531	XPOT; NUP107; RAN; NUP210; NUP93; NUP37; CSTF2; CPSF1; NUP155; NUP214; TRNT1; NUP205; RANBP2	1478; 5901; 9688; 51095; 23165; 11260; 29894; 5903; 23225; 57122; 8021; 79023; 9631	57	57
	0.000522405	0.00347642	CXCR4-mediated signaling events	PID	cxcr4_pathway	SRC; STAT3; CSK; STAT1; RAC1; FYN; LIMK1; GNB1; DNM1; GNA13; CFL1; PDPK1; HCK; LYN; PAK1; YES1; PXN	4067; 1759; 1072; 6772; 3055; 6714; 5879; 7525; 10672; 2782; 2534; 5058; 3984; 5170; 1445; 5829; 6774	87	87
	0.000527885	0.00350238	Insulin-like Growth Factor-2 mRNA Binding Proteins (IGF2BPs/IMPs/VICKZs) bind RNA	Reactome	R-HSA-428359	IGF2BP1; IGF2BP3; IGF2BP2	10644; 10643; 10642	3	3
	0.000533866	0.00353149	Senescence-Associated Secretory Phenotype (SASP)	Reactome	R-HSA-2559582	CDKN2C; H2AFV; RPS27A; UBC; HIST1H2AK; HIST1H2AC; HIST1H2AJ; H2AFX; H2AFZ; UBA52; HIST1H2BA; UBB; NFKB1; HIST1H2AE; HIST1H2AD; HIST2H2AA3; HIST2H2AA4; HIST2H2AC; H2AFJ; HIST1H2AB	255626; 723790; 3013; 8330; 3014; 7314; 4790; 1031; 55766; 8335; 3012; 8338; 8337; 7311; 8331; 7316; 8334; 3015; 6233; 94239	112	111
	0.000554595	0.00365769	skeletal muscle hypertrophy is regulated via akt-mtor pathway	BioCarta	igf1mtorpathway	EIF2S1; EIF4G1; EIF4E; PDPK1; PSMC4; EIF4A1; EIF2S3; EIF2S2	1965; 8894; 1973; 1977; 1968; 5170; 1981; 5704	25	25
	0.000559201	0.00367712	Scavenging by Class F Receptors	Reactome	R-HSA-3000484	HSP90AA1; CALR; HSPH1; HYOU1	10808; 3320; 811; 10525	6	6
	0.000564476	0.00368991	Export of Viral Ribonucleoproteins from Nucleus	Reactome	R-HSA-168274	NUP107; RAN; NUP93; NUP37; NUP155; NUP214; NUP210; NUP205; RANBP2	5901; 9688; 23165; 5903; 23225; 57122; 8021; 79023; 9631	31	31
	0.000564476	0.00368991	Synthesis of active ubiquitin: roles of E1 and E2 enzymes	Reactome	R-HSA-8866652	UBE2K; UBB; RPS27A; USP5; UBA6; UBA52; UBE2Z; UBE2G1; UBC	7326; 65264; 3093; 7316; 7311; 55236; 8078; 7314; 6233	31	31
	0.000575638	0.0037408	Central carbon metabolism in cancer - Homo sapiens (human)	KEGG	path:hsa05230	ERBB2; PDGFRA; MAP2K2; HK2; PIK3CD; IDH1; HK1; EGFR; KIT; PDK1; MET; MAP2K1; PIK3R3; FLT3	4233; 2064; 2322; 3417; 3098; 3099; 1956; 5163; 8503; 5293; 5156; 5604; 5605; 3815	65	65
	0.000575638	0.0037408	DroToll-like	INOH	None	CASP8; PSMB4; PSMB10; PSMD4; CASP1; PSMD10; PSMD13; PSMA1; PSMA7; PSMA5; PSMC1; PSMC3; PSMC4; CNDP1	5716; 5702; 5682; 5686; 5719; 5710; 5700; 84735; 5704; 5699; 5688; 834; 5692; 841	65	65
	0.000585497	0.00379375	nfat and hypertrophy of the heart	BioCarta	nfatpathway	ACTA1; ATP2A1; ATP2A2; ATP2A3; CALR; CAMKK2; YWHAH; GRB2; PDPK1; PPP3CA; ADSS	5530; 487; 5170; 10645; 58; 2885; 811; 489; 7533; 159; 488	44	44
	0.000609858	0.00394008	Toll-like receptor signaling pathway - Homo sapiens (human)	KEGG	path:hsa04620	TOLLIP; MAPK9; IRF5; STAT1; RAC1; TAB1; PIK3CD; MAP2K1; CASP8; MAP2K2; CD14; PIK3R3; SPP1; IKBKG; TBK1; LY96; NFKB1; TLR8; MYD88	4615; 6696; 3663; 23643; 51311; 6772; 5293; 4790; 54472; 10454; 5879; 8503; 8517; 841; 929; 29110; 5601; 5604; 5605	104	104
	0.000612123	0.00394321	FBXL7 down-regulates AURKA during mitotic entry and in early mitosis	Reactome	R-HSA-8854050	RBX1; UBA52; RPS27A; UBB; UBC	7316; 9978; 7314; 6233; 7311	10	10
	0.00066755	0.0042878	DNA Damage Recognition in GG-NER	Reactome	R-HSA-5696394	RUVBL1; RPS27A; CUL4A; UBA52; ACTL6A; UBB; UBC; RBX1; ACTB; COPS7B	8451; 86; 7316; 7311; 64708; 9978; 7314; 6233; 8607; 60	38	38
	0.000677213	0.00432479	Glycolysis and Gluconeogenesis	EHMN	Glycolysis and Gluconeogenesis	PDHX; ALDH3A1; NUP107; NUP210; HK1; NUP93; NUP37; AKR1A1; NUP155; ME2; NUP214; PGK2; NUP205; RANBP2	3098; 9688; 5232; 5903; 23165; 218; 23225; 8050; 57122; 8021; 79023; 9631; 10327; 4200	67	66
	0.000677213	0.00432479	AGE-RAGE pathway	Wikipathways	WP2324	SRC; MYD88; STAT3; STAT1; RAC1; PRKCB; EGFR; PRKCD; CASP8; ROCK1; MAP2K1; DDOST; NFKB1; MAPK9	5601; 4615; 6714; 5604; 5580; 5579; 1956; 6093; 4790; 1650; 841; 6772; 6774; 5879	66	66
	0.000689367	0.00438976	Urea cycle and metabolism of arginine, proline, glutamate, aspartate and asparagine	EHMN	Urea cycle and metabolism of arginine, proline, glutamate, aspartate and asparagine	P4HA1; PYCR1; GCLM; NUP107; P4HB; ALDH3A1; NUP93; GLUD2; NUP37; GPX1; MGST1; NUP155; NUP214; IL4I1; ALDH18A1; NUP210; CPS1; NUP205; RANBP2	259307; 23225; 57122; 9631; 1373; 5903; 5831; 5034; 4257; 9688; 23165; 5033; 218; 79023; 8021; 2747; 5832; 2730; 2876	106	105
	0.000712489	0.00451569	Epstein-Barr virus infection - Homo sapiens (human)	KEGG	path:hsa05169	TAP1; HDAC1; PSMD4; BAX; CASP8; STAT3; STAT1; PIK3CD; PIK3R3; ICAM1; NFKB1; LYN; MYD88; PSMC4; PSMC6; HLA-DPB1; RAC1; CD44; PDIA3; PSMC1; PSMC3; TBK1; MAPK9; TAB1; EIF2AK2; PSMD13; VIM; PSMD14; CALR; IKBKG	4615; 3383; 5700; 5704; 5706; 5719; 6772; 6774; 5293; 4790; 10454; 6890; 5879; 3115; 7431; 4067; 811; 8503; 8517; 841; 2923; 581; 5702; 29110; 960; 5710; 5601; 10213; 5610; 3065	201	200
	0.000713218	0.00451569	superpathway of purine nucleotide salvage	HumanCyc	PWY66-409	ATP6V1F; ADSS; NME2; NME3; NME1-NME2; IMPDH1; IMPDH2; AK4; AK2; ATP6V0D1; GMPS; ATP6V1C1; NME1	9114; 654364; 528; 4831; 159; 205; 4830; 4832; 8833; 204; 3614; 9296; 3615	59	59
	0.000719127	0.0045342	a6b1 and a6b4 Integrin signaling	PID	a6b1_a6b4_integrin_pathway	ERBB2; YWHAZ; RAC1; YWHAQ; EGFR; SFN; MET; YWHAH; GRB2; YWHAB; YWHAG	7532; 10971; 1956; 2885; 2064; 5879; 7534; 7529; 2810; 7533; 4233	45	45
	0.000729661	0.0045342	Vpr-mediated nuclear import of PICs	Reactome	R-HSA-180910	NUP155; NUP107; NUP93; NUP37; KPNA1; NUP214; NUP210; NUP205; RANBP2	9688; 23165; 3836; 5903; 23225; 57122; 8021; 79023; 9631	32	32
	0.000729661	0.0045342	Translocation of GLUT4 to the plasma membrane	Reactome	R-HSA-1445148	YWHAZ; PRKAB1; YWHAQ; SFN; YWHAH; YWHAB; RAB10; YWHAG; RALA	10890; 7532; 10971; 7534; 5564; 5898; 7529; 2810; 7533	32	32
	0.000730294	0.0045342	EPHA-mediated growth cone collapse	Reactome	R-HSA-3928663	SRC; FYN; ROCK1; ROCK2; LYN; YES1	4067; 6714; 9475; 6093; 7525; 2534	15	15
	0.000730294	0.0045342	Nucleobase biosynthesis	Reactome	R-HSA-8956320	ADSS; IMPDH1; IMPDH2; PPAT; GMPS; CAD	8833; 5471; 3614; 3615; 790; 159	15	15
	0.000730294	0.0045342	PAR4-mediated thrombin signaling events	PID	thrombin_par4_pathway	GNAQ; GNB1; ROCK1; ROCK2; GNA14; GNA13	9475; 6093; 2776; 9630; 2782; 10672	15	15
	0.000730465	0.0045342	Ion homeostasis	Reactome	R-HSA-5578775	STIM1; AHCYL1; ATP2A1; ATP2A2; ATP2A3; CAMK2D; SRI; CAMK2A; ATP1A4; ATP1A2; ATP1A1; ATP2B3	492; 487; 476; 10768; 817; 6786; 480; 6717; 477; 815; 489; 488	52	52
	0.000744853	0.0045991	signaling pathway from g-protein families	BioCarta	gpcrpathway	GNAQ; GNAS; PRKCB; GNB1; MAP2K1; PRKAR1A; PRKAR1B; PPP3CA	5530; 2776; 5573; 2778; 2782; 5575; 5604; 5579	26	26
	0.000745071	0.0045991	Fluid shear stress and atherosclerosis - Homo sapiens (human)	KEGG	path:hsa05418	ACTG1; SUMO1; SUMO2; SUMO4; HSP90B1; MGST1; IKBKG; RAC2; CAV2; PIK3CD; HSP90AB1; PIK3R3; ICAM1; NFKB1; MAPK9; SRC; CTSL; RAC3; RAC1; VCAM1; CALML3; HSP90AA1; ACTB	387082; 7184; 6714; 60; 71; 4257; 5293; 4790; 7412; 5879; 3320; 5881; 3326; 810; 8503; 8517; 3383; 858; 5880; 6613; 5601; 1514; 7341	139	139
	0.00077443	0.00476705	Proteoglycans in cancer - Homo sapiens (human)	KEGG	path:hsa05205	CTTN; ACTG1; EGFR; MAP2K2; MAP2K1; CTSL; CAV2; IQGAP1; STAT3; PIK3CD; THBS1; PIK3R3; PXN; ERBB2; SRC; CD63; ERBB4; RAC1; CAMK2D; CD44; PRKCB; CAMK2A; SOS2; ROCK1; ROCK2; MET; GRB2; PDPK1; ACTB; PAK1	2064; 2066; 6714; 60; 71; 6774; 8826; 4233; 5293; 5579; 5829; 5879; 9475; 5170; 815; 817; 8503; 2885; 858; 7057; 1956; 960; 5058; 967; 6093; 2017; 5604; 5605; 1514; 6655	201	201
	0.000793555	0.00487124	EGFR Inhibitor Pathway, Pharmacodynamics	PharmGKB	PA162356267	ERBB2; STAT3; STAT1; ERBB4; CAMK2D; EGFR; PRKCB; PIK3CD; CAMK2A; CAMK1; MAP2K1; GRB2; PIK3R3; NFKB1	8503; 5293; 2066; 1956; 2064; 817; 815; 4790; 6774; 5579; 2885; 8536; 5604; 6772	67	67
	0.000833576	0.00510278	MAPK6/MAPK4 signaling	Reactome	R-HSA-5687128	RPS27A; RAC1; DNAJB1; HSPB1; UBA52; UBB; UBC; IGF2BP1; PAK1; PAK3	7314; 3337; 3315; 5879; 7316; 7311; 5063; 10642; 6233; 5058	39	39
	0.000840989	0.00513397	Ras Signaling	Wikipathways	WP4223	BCL2L1; PDGFRA; EGFR; MAP2K2; MAP2K1; IKBKG; FLT3; PIK3CD; PIK3R3; NFKB1; MAPK9; RAC2; RAC3; RAC1; GNB4; PRKCB; GNB1; GNB2; STK4; SOS2; CALML3; KIT; MET; GRB2; PAK4; PAK1; RALA; PAK3	10298; 2322; 810; 1956; 4233; 6655; 598; 5156; 5605; 5604; 5601; 5063; 2783; 2782; 6789; 8517; 3815; 5579; 5879; 8503; 2885; 5898; 5881; 5880; 5293; 5058; 59345; 4790	184	184
	0.000857454	0.0052201	Calcium Regulation in the Cardiac Cell	Wikipathways	WP536	ATP2A2; ATP2A3; YWHAZ; CAMK1; YWHAQ; YWHAH; YWHAB; YWHAG; CAMK2D; GNB4; PRKCB; GNB1; CAMK2A; PRKCD; PRKAR1A; PRKAR1B; ATP2B3; GNB2; GNAQ; GNAS; CALR; SFN; ATP1A4; FKBP1A	492; 811; 815; 817; 7534; 8536; 2776; 2783; 7533; 7532; 2280; 7529; 5580; 5575; 5573; 2778; 480; 2810; 5579; 59345; 10971; 489; 488; 2782	149	149
	0.000877136	0.0053253	SUMOylation of RNA binding proteins	Reactome	R-HSA-4570464	UBE2I; NUP107; SUMO1; SUMO2; NUP93; NUP37; NUP155; NUP214; NUP210; NUP205; RANBP2	7329; 9688; 23165; 7341; 5903; 23225; 8021; 57122; 6613; 79023; 9631	46	46
	0.00089033	0.00539063	Choline metabolism in cancer - Homo sapiens (human)	KEGG	path:hsa05231	PCYT1A; PDGFRA; MAPK9; RAC2; RAC3; WASF2; RAC1; LYPLA1; PRKCB; PIK3CD; MAP2K2; MAP2K1; GRB2; PIK3R3; PDPK1; EGFR; RHEB; SOS2	5130; 5156; 5170; 5293; 10434; 5879; 5880; 5881; 8503; 2885; 6009; 10163; 5579; 1956; 5601; 5604; 5605; 6655	99	99
	0.000926325	0.00558313	Activated PKN1 stimulates transcription of AR (androgen receptor) regulated genes KLK2 and KLK3	Reactome	R-HSA-5625886	H2AFV; H2AFX; H2AFZ; HIST1H2BA; HIST1H2AC; HIST1H2AK; HIST1H2AJ; HIST1H2AE; HIST1H2AD; HIST2H2AA3; HIST2H2AA4; HIST2H2AC; H2AFJ; HIST1H2AB	3014; 8337; 723790; 3013; 8331; 55766; 8335; 3012; 8330; 8334; 3015; 8338; 94239; 255626	69	68
	0.000932201	0.00558313	phospholipids as signalling intermediaries	BioCarta	edg1pathway	SRC; PDGFRA; RAC1; PRKCB; GNB1; MAP2K2; MAP2K1; GRB2; PDPK1	5170; 6714; 5156; 2885; 5879; 2782; 5605; 5604; 5579	33	33
	0.000932201	0.00558313	bioactive peptide induced signaling pathway	BioCarta	biopeptidespathway	STAT3; STAT1; CAMK2D; FYN; PRKCB; GNB1; CAMK2A; GRB2; CDK5	6772; 2534; 2885; 817; 1020; 2782; 6774; 815; 5579	33	33
	0.000932201	0.00558313	Cooperation of Prefoldin and TriC/CCT in actin and tubulin folding	Reactome	R-HSA-389958	PFDN2; VBP1; PFDN6; CCT2; CCT7; TUBB1; TUBAL3; ACTB; CCT6B	79861; 10471; 81027; 10574; 5202; 7411; 10693; 10576; 60	33	33
	0.000939407	0.00561112	TICAM1, RIP1-mediated IKK complex recruitment	Reactome	R-HSA-168927	RPS27A; UBA52; TMEM189-UBE2V1; IKBKG; UBB; UBC; UBE2V1	7316; 7311; 7335; 7314; 6233; 8517; 387522	21	21
	0.000984265	0.0058199	transcription factor creb and its extracellular signals	BioCarta	crebpathway	GNAS; CAMK2D; PRKCB; CAMK2A; GRB2; PRKAR1A; PRKAR1B; PDPK1	2885; 817; 5573; 2778; 5170; 815; 5575; 5579	27	27
	0.000984265	0.0058199	Photodynamic therapy-induced unfolded protein response	Wikipathways	WP3613	HSPA5; PDIA6; CALR; WARS; EIF2A; DNAJC3; DNAJB11; HSP90B1	5611; 3309; 83939; 7453; 811; 10130; 7184; 51726	27	27
	0.000984265	0.0058199	Vitamin D3 (cholecalciferol) metabolism	EHMN	Vitamin D3 (cholecalciferol) metabolism	NUP107; NUP93; NUP37; NUP155; NUP214; NUP210; NUP205; RANBP2	9688; 23165; 5903; 23225; 57122; 8021; 79023; 9631	27	27
	0.000984865	0.0058199	Transport to the Golgi and subsequent modification	Reactome	R-HSA-948021	CAPZB; DYNLL1; ARFGAP2; DCTN4; TMED10; COPZ1; BET1; TMED3; SEC23A; TMED9; NAPG; COPE; CTSC; MAN2A1; SEC24D; CTSZ; LMAN1; YKT6; DYNC1LI2; ANKRD28; CAPZA1; TFG; TRAPPC4; GOLGB1; COPB2; GBF1	8774; 10484; 22818; 832; 54732; 10282; 23243; 51164; 1783; 1522; 51399; 1075; 9276; 8655; 3998; 2804; 8729; 11316; 9871; 23423; 4124; 829; 10972; 84364; 10342; 10652	168	168
	0.00100551	0.0059052	Signaling by VEGF	Reactome	R-HSA-194138	ROCK1; SRC; PRKCB; AHCYL1; WASF2; RAC1; ABI2; ABI1; FYN; PRKCD; ROCK2; PAK1; PXN; PDPK1; HSP90AA1; MAPKAPK3; ELMO1; PAK3	3320; 9475; 2534; 5580; 10006; 9844; 6714; 10768; 5879; 5058; 10163; 5579; 7867; 5170; 5829; 10152; 6093; 5063	100	100
	0.00100723	0.0059052	Direct p53 effectors	PID	p53downstreampathway	BCL2L1; TAP1; MAP4K4; EGFR; CARM1; BAX; NDRG1; SERPINE1; GPX1; PML; PYCARD; PCNA; PRKAB1; PRMT1; TRRAP; IGFBP3; IRF5; CASP1; TAF9; SFN; MET; SPP1; STEAP3	1956; 581; 598; 10397; 5371; 29108; 6880; 4233; 3663; 5054; 6890; 10498; 55240; 2810; 8295; 3486; 9448; 6696; 3276; 5564; 834; 5111; 2876	143	142
	0.0010073	0.0059052	Pyrimidine metabolism	Wikipathways	WP4022	DCK; NME2; DPYD; NME1-NME2; NT5C; NME3; TYMP; POLR2H; POLR2E; POLR2G; DTYMK; POLR2L; NME1; CTPS2; CMPK2; CAD	30833; 1890; 1633; 5436; 5434; 790; 129607; 5441; 5437; 1806; 4831; 1841; 4832; 654364; 4830; 56474	84	84
	0.00104475	0.00599913	Signaling by PTK6	Reactome	R-HSA-8848021	ERBB2; NR3C1; STAT3; ERBB4; RAC1; RPS27A; EGFR; UBA52; PXN; UBB; UBC; ELMO1	2066; 9844; 1956; 2064; 5879; 7316; 7311; 5829; 2908; 6774; 7314; 6233	54	54
	0.00104475	0.00599913	Signaling by Non-Receptor Tyrosine Kinases	Reactome	R-HSA-9006927	ERBB2; NR3C1; STAT3; ERBB4; RAC1; RPS27A; EGFR; UBA52; PXN; UBB; UBC; ELMO1	2066; 9844; 1956; 2064; 5879; 7316; 7311; 5829; 2908; 6774; 7314; 6233	54	54
	0.00104768	0.00599913	regulation of eif2	BioCarta	eif2pathway	EIF2AK2; EIF2S1; EIF5; EIF2S3; EIF2S2	1965; 8894; 1968; 1983; 5610	11	11
	0.00104768	0.00599913	CMP phosphorylation	HumanCyc	PWY-7205	NME1-NME2; CMPK2; NME1; NME2; NME3	4832; 4830; 129607; 4831; 654364	11	11
	0.00104768	0.00599913	role of ran in mitotic spindle regulation	BioCarta	ranmspathway	RAN; RCC1; RANBP1; RANGAP1; RANBP2	5902; 5903; 5901; 1104; 5905	11	11
	0.00104768	0.00599913	GAB1 signalosome	Reactome	R-HSA-180292	SRC; GRB2; EGFR; PXN; CSK	6714; 5829; 1956; 2885; 1445	11	11
	0.00104768	0.00599913	Hh mutants that don,t undergo autocatalytic processing are degraded by ERAD	Reactome	R-HSA-5362768	UBA52; RPS27A; ERLEC1; UBB; UBC	7316; 7311; 7314; 6233; 27248	11	11
	0.00104768	0.00599913	Hh mutants abrogate ligand secretion	Reactome	R-HSA-5387390	UBA52; RPS27A; ERLEC1; UBB; UBC	7316; 7311; 7314; 6233; 27248	11	11
	0.00104768	0.00599913	SeMet incorporation into proteins	Reactome	R-HSA-2408517	LARS; KARS; RARS; IARS; AIMP1	51520; 9255; 3376; 5917; 3735	11	11
	0.00106282	0.00605451	PCP/CE pathway	Reactome	R-HSA-4086400	RPS27A; RAC2; RAC3; RAC1; AP2A2; PRKCB; PFN1; UBA52; AP2A1; UBB; UBC	161; 5881; 160; 5880; 5879; 7316; 7311; 5216; 7314; 6233; 5579	47	47
	0.00106282	0.00605451	Thymic Stromal LymphoPoietin (TSLP) Signaling Pathway	Wikipathways	WP2203	SRC; STAT3; STAT1; FYN; MAP2K2; MAP2K1; HCK; NFKB1; LYN; MAPK9; YES1	5605; 5604; 4067; 6714; 3055; 4790; 6774; 6772; 7525; 5601; 2534	47	47
	0.00107088	0.00607874	Axon guidance	Reactome	R-HSA-422475	ACTG1; LIMK1; EGFR; MAP2K2; MAP2K1; DNM1; DNM3; YES1; SH3GL2; MET; FYN; PFN2; HSP90AB1; LYN; GIT1; ERBB2; SRC; HSPA8; DPYSL3; RAC1; ARPC2; ARPC5; ARPC4; AP2A1; CFL1; AP2A2; RPS27A; CSNK2A2; SOS2; RPS6KA6; ARPC1B; ROCK1; ROCK2; PAK1; PFN1; UBA52; GRB2; CDK5; UBB; UBC; PAK4; HSP90AA1; ACTB; ACTR3; CSNK2B; PAK3	5605; 10092; 6714; 5216; 161; 2885; 1759; 26052; 1459; 7316; 6093; 10109; 2534; 1460; 3326; 60; 5058; 3984; 7311; 71; 3312; 10093; 5063; 1020; 5217; 5879; 9475; 5604; 1809; 10095; 7314; 160; 6233; 27330; 4067; 3320; 10096; 1956; 1072; 6456; 10298; 28964; 2064; 7525; 6655; 4233	358	357
	0.00107731	0.00607874	SIRT1 negatively regulates rRNA expression	Reactome	R-HSA-427359	H2AFV; H2AFX; H2AFZ; HIST1H2BA; HIST1H2AC; HIST1H2AK; HIST1H2AJ; HIST1H2AE; HIST1H2AD; HIST2H2AA3; HIST2H2AA4; HIST2H2AC; H2AFJ; HIST1H2AB	3014; 8337; 723790; 3013; 8331; 55766; 8335; 8334; 3012; 8330; 3015; 8338; 94239; 255626	70	69
	0.00108111	0.00607874	RAF/MAP kinase cascade	Reactome	R-HSA-5673001	PDGFRA; APBB1IP; RPS27A; EGFR; MAP2K2; MAP2K1; IQGAP1; ERBB4; NEFL; FYN; PEA15; MARK3; YWHAB; ERBB2; SRC; IL5RA; CSK; CAMK2D; UBC; CAMK2A; PPP5C; AKAP9; KIT; MET; UBA52; GRB2; UBB; PHB; RBX1	54518; 1956; 2064; 5605; 7529; 4233; 5536; 6714; 817; 4140; 5604; 815; 9978; 2534; 10142; 5245; 2885; 7311; 3815; 8826; 7314; 1445; 3568; 6233; 5156; 8682; 4747; 7316; 2066	197	196
	0.00108902	0.00607874	pyrimidine deoxyribonucleotides biosynthesis from CTP	HumanCyc	PWY-7210	NTPCR; NME1; NME2; NME3; NME1-NME2; DTYMK	4832; 4830; 84284; 1841; 654364; 4831	16	16
	0.00108902	0.00607874	pyrimidine deoxyribonucleotides <i>de novo</i> biosynthesis	HumanCyc	PWY-7184	NTPCR; NME1; NME2; NME3; NME1-NME2; DTYMK	4832; 4830; 84284; 1841; 654364; 4831	16	16
	0.00108902	0.00607874	p75NTR signals via NF-kB	Reactome	R-HSA-193639	RPS27A; UBA52; UBB; UBC; NFKB1; MYD88	7316; 7311; 4615; 6233; 7314; 4790	16	16
	0.00108902	0.00607874	TGF-beta receptor signaling in EMT (epithelial to mesenchymal transition)	Reactome	R-HSA-2173791	PARD3; UBC; RPS27A; UBA52; UBB; FKBP1A	7316; 56288; 7311; 2280; 7314; 6233	16	16
	0.00108902	0.00607874	Regulation of KIT signaling	Reactome	R-HSA-1433559	SRC; FYN; KIT; GRB2; LYN; YES1	7525; 4067; 6714; 2534; 3815; 2885	16	16
	0.00113317	0.00629348	TRIF(TICAM1)-mediated TLR4 signaling	Reactome	R-HSA-937061	MAPK9; TBK1; HMGB1; RPS27A; MAP2K1; CASP8; CD14; TMEM189-UBE2V1; UBA52; IKBKG; UBB; UBC; LY96; NFKB1; MYD88; MAPKAPK3; TAB1; UBE2V1	929; 4790; 4615; 841; 5601; 5604; 387522; 23643; 8517; 7311; 7314; 7867; 3146; 29110; 10454; 7316; 7335; 6233	101	101
	0.00113317	0.00629348	MyD88-independent TLR4 cascade	Reactome	R-HSA-166166	MAPK9; TBK1; HMGB1; RPS27A; MAP2K1; CASP8; CD14; TMEM189-UBE2V1; UBA52; IKBKG; UBB; UBC; LY96; NFKB1; MYD88; MAPKAPK3; TAB1; UBE2V1	929; 4790; 4615; 841; 5601; 5604; 387522; 23643; 8517; 7311; 7314; 7867; 3146; 29110; 10454; 7316; 7335; 6233	101	101
	0.0011501	0.00637155	Formation of the beta-catenin:TCF transactivating complex	Reactome	R-HSA-201722	HDAC1; H2AFV; RUVBL1; HIST1H2AC; H2AFX; TRRAP; H2AFZ; HIST1H2BA; HIST1H2AK; HIST1H2AJ; HIST1H2AE; HIST1H2AD; HIST2H2AA3; HIST2H2AA4; HIST2H2AC; H2AFJ; HIST1H2AB	255626; 3065; 723790; 8330; 8607; 3014; 3013; 55766; 8295; 8335; 3012; 8338; 8337; 8331; 8334; 3015; 94239	94	93
	0.00116744	0.00645151	Signaling events mediated by focal adhesion kinase	PID	fak_pathway	SRC; ACTA1; RAC1; FYN; ROCK2; PAK1; MAP2K1; GRB2; PXN; MAPK9; SH3GL1; ELMO1; YES1	9844; 58; 2534; 2885; 6714; 5601; 5829; 9475; 5879; 5604; 7525; 6455; 5058	62	62
	0.00117806	0.00647786	IL8- and CXCR2-mediated signaling events	PID	il8cxcr2_pathway	RAC2; PRKCB; GNB1; GNA14; DNM1; HCK; PDPK1; LYN; ELMO1	4067; 5170; 9630; 9844; 3055; 5880; 1759; 2782; 5579	34	34
	0.00117806	0.00647786	Signaling of Hepatocyte Growth Factor Receptor	Wikipathways	WP313	SRC; STAT3; CRKL; MET; MAP2K2; MAP2K1; GRB2; PXN; PAK1	5605; 5604; 5058; 2885; 5829; 1399; 6714; 4233; 6774	34	34
	0.00118528	0.00650143	Sphingolipid signaling pathway - Homo sapiens (human)	KEGG	path:hsa04071	SGPL1; MAPK9; RAC2; GNAQ; RAC1; FYN; PRKCB; PIK3CD; ROCK1; BAX; MAP2K2; MAP2K1; PIK3R3; GNA12; ROCK2; NFKB1; PDPK1; NSMAF; GNA13; RAC3	5293; 8879; 5170; 581; 4790; 5579; 6093; 2776; 2768; 8439; 5880; 5881; 9475; 8503; 5605; 10672; 5879; 5601; 5604; 2534	118	118
	0.00122114	0.00661624	Tenofovir/Adefovir Pathway, Pharmacodynamics	PharmGKB	PA155028030	AK2; NME1; NME2; AK4	204; 205; 4830; 4831	7	7
	0.00122114	0.00661624	Ubiquitin-dependent degradation of Cyclin D1	Reactome	R-HSA-69229	UBA52; RPS27A; UBB; UBC	7316; 7311; 7314; 6233	7	7
	0.00122114	0.00661624	Ubiquitin-dependent degradation of Cyclin D	Reactome	R-HSA-75815	UBA52; RPS27A; UBB; UBC	7316; 7311; 7314; 6233	7	7
	0.00122114	0.00661624	Autodegradation of the E3 ubiquitin ligase COP1	Reactome	R-HSA-349425	UBA52; RPS27A; UBB; UBC	7316; 7311; 7314; 6233	7	7
	0.00122114	0.00661624	Vpu mediated degradation of CD4	Reactome	R-HSA-180534	UBA52; RPS27A; UBB; UBC	7316; 7311; 7314; 6233	7	7
	0.00123973	0.00668429	Legionellosis - Homo sapiens (human)	KEGG	path:hsa05134	IL18; HSPA2; CASP1; EEF1A1; HSPA8; CASP8; HSPD1; CD14; PYCARD; NFKB1; MYD88; HSPA1L	3329; 4615; 3606; 929; 29108; 4790; 3305; 834; 841; 3306; 3312; 1915	55	55
	0.00123973	0.00668429	RANKL-RANK (Receptor activator of NFKB (ligand)) Signaling Pathway	Wikipathways	WP2018	SRC; PAPSS2; STAT1; RAC1; TAB1; MAP2K1; VCAM1; ICAM1; NFKB1; LYN; MAPK9; IKBKG	9060; 5604; 5601; 6714; 4067; 7412; 8517; 4790; 3383; 6772; 10454; 5879	55	55
	0.0012676	0.00680145	Nucleotide-binding Oligomerization Domain (NOD) pathway	Wikipathways	WP1433	IL18; CASP1; RAC1; ACAP1; CASP8; CARD9; IKBKG; PYCARD; HSP90AA1; AAMP	3320; 3606; 834; 64170; 8517; 9744; 14; 841; 29108; 5879	41	41
	0.0012676	0.00680145	Binding and Uptake of Ligands by Scavenger Receptors	Reactome	R-HSA-2173782	MARCO; HSPH1; HYOU1; HPR; HP; HSP90B1; SPARC; LRP1; HSP90AA1; CALR	8685; 3250; 3320; 10525; 3240; 811; 4035; 10808; 7184; 6678	41	41
	0.00128147	0.0068321	Regulation of RUNX2 expression and activity	Reactome	R-HSA-8939902	NR3C1; STAT1; RPS27A; UBA52; CBFB; UBB; UBC; RBX1	2908; 6772; 7316; 7311; 865; 9978; 7314; 6233	28	28
	0.00128147	0.0068321	Prefoldin mediated transfer of substrate to CCT/TriC	Reactome	R-HSA-389957	PFDN2; VBP1; PFDN6; CCT2; CCT7; TUBB1; ACTB; CCT6B	10471; 81027; 10574; 5202; 7411; 10693; 10576; 60	28	28
	0.00128256	0.0068321	Signal transduction by L1	Reactome	R-HSA-445144	RAC1; EGFR; CSNK2A2; MAP2K2; MAP2K1; CSNK2B; PAK1	1956; 5879; 1460; 5604; 1459; 5605; 5058	22	22
	0.00129296	0.00687096	Signaling by Interleukins	Reactome	R-HSA-449147	CRKL; PIK3CD; HMGB1; RPS27A; MAP2K1; STXBP2; IKBKG; HCK; MAPKAPK3; FLT3; YES1; YWHAZ; STAT3; STAT1; FYN; GRB2; PIK3R3; NFKB1; LYN; MAPK9; IL5RA; P4HB; TXLNA; UBE2V1; IL18; MYD88; TOLLIP; CASP1; TAB1; IL16; UBA52; TMEM189-UBE2V1; UBB; UBC; RBX1	4067; 2885; 6813; 1399; 200081; 4790; 6772; 4615; 5601; 7525; 2322; 5604; 5034; 2534; 387522; 8517; 7311; 3603; 7314; 9978; 3606; 8503; 834; 7867; 3568; 3146; 5293; 10454; 7316; 7534; 7335; 6774; 54472; 3055; 6233	254	254
	0.0013006	0.00689503	Interferon gamma signaling	Reactome	R-HSA-877300	HLA-DPB1; CD44; TRIM38; STAT1; IRF5; CAMK2D; TRIM25; GBP1; FCGR1B; PRKCD; CAMK2A; SUMO1; VCAM1; ICAM1; GBP2; PML; SP100	10475; 7412; 5371; 815; 5580; 3663; 6772; 6672; 817; 7706; 2210; 3383; 2634; 7341; 2633; 960; 3115	94	94
	0.00130554	0.00690474	Apoptosis - Homo sapiens (human)	KEGG	path:hsa04210	BCL2L1; ACTG1; BAX; MAP2K2; MAP2K1; DIABLO; EIF2S1; HTRA2; PIK3CD; PIK3R3; NFKB1; MAPK9; CTSL; CTSB; CTSC; CTSZ; LMNB1; TUBAL3; CASP8; PDPK1; ACTB; IKBKG	5170; 1075; 60; 581; 71; 598; 5293; 4790; 27429; 56616; 5604; 8503; 5605; 8517; 4001; 1965; 841; 5601; 1508; 1514; 1522; 79861	136	136
	0.00131904	0.00695948	Neurotrophin signaling pathway - Homo sapiens (human)	KEGG	path:hsa04722	MAPK9; CRKL; RPS6KA6; RAC1; CALML3; MAGED1; ARHGDIA; PIK3CD; CAMK2A; BAX; PRKCD; MAP2K2; CAMK2D; MAP2K1; GRB2; PIK3R3; NFKB1; PDPK1; ARHGDIB; SOS2	5170; 581; 5293; 4790; 27330; 5879; 9500; 810; 815; 817; 8503; 2885; 1399; 396; 397; 5580; 5601; 5604; 5605; 6655	119	119
	0.00146546	0.00770224	SUMO E3 ligases SUMOylate target proteins	Reactome	R-HSA-3108232	HDAC1; SMC1A; STAG1; NUP107; SUMO1; NUP93; SUMO2; RPA1; UBE2I; TOP1; PML; PCNA; NUP37; NUP155; NUP214; RAD21; RANBP2; NUP210; NUP205; SP100	7341; 3065; 57122; 23225; 6117; 9631; 6672; 5903; 6613; 8243; 7329; 9688; 23165; 7150; 10274; 79023; 8021; 5885; 5371; 5111	120	120
	0.00147371	0.00770224	Alanine, aspartate and glutamate metabolism - Homo sapiens (human)	KEGG	path:hsa00250	NIT2; ADSS; IL4I1; GLUD2; PPAT; GFPT1; GFPT2; CPS1; CAD	790; 159; 2747; 9945; 1373; 5471; 259307; 2673; 56954	35	35
	0.00147371	0.00770224	Arf6 signaling events	PID	arf6_pathway	SRC; GNAQ; EGFR; ACAP1; ADAP1; MET; GNA14; GIT1; PXN	2776; 9630; 11033; 1956; 6714; 28964; 5829; 9744; 4233	35	35
	0.00147371	0.00770224	Interactions of Vpr with host cellular proteins	Reactome	R-HSA-176033	NUP155; NUP107; NUP93; NUP37; KPNA1; NUP214; NUP210; NUP205; RANBP2	9688; 23165; 3836; 5903; 23225; 57122; 8021; 79023; 9631	35	35
	0.00154512	0.00805643	Putative anti-Inflammatory metabolites formation from EPA	EHMN	Putative anti-Inflammatory metabolites formation from EPA	NUP107; DHRS4; NUP93; NUP37; DHRS4L1; NUP155; NUP214; NUP210; NUP205; RANBP2	728635; 9688; 23165; 10901; 5903; 23225; 57122; 8021; 79023; 9631	42	42
	0.00160813	0.00836531	Viral carcinogenesis - Homo sapiens (human)	KEGG	path:hsa05203	HDAC1; BAX; IKBKG; VDAC3; YWHAZ; STAT3; MAD1L1; YWHAQ; PIK3CD; YWHAH; PIK3R3; PXN; YWHAB; NFKB1; ATP6V0D1; RANBP1; YWHAG; SRC; RAC1; HIST1H2BA; SND1; PSMC1; LYN; UBR4; VAC14; EIF2AK2; CASP8; GRB2; SP100	5293; 6672; 6714; 5700; 581; 7529; 255626; 5829; 4790; 8379; 10971; 5879; 7419; 5902; 8503; 2885; 23352; 6774; 7532; 7533; 7534; 3065; 9114; 8517; 27044; 841; 55697; 4067; 5610	201	201
	0.00164587	0.00854156	Pentose phosphate pathway	EHMN	Pentose phosphate pathway	NUP107; NUP93; NUP37; NUP155; NUP214; NUP210; NUP205; RANBP2	9688; 23165; 5903; 23225; 8021; 57122; 79023; 9631	29	29
	0.00165927	0.00856266	Hedgehog	INOH	None	CDKN2C; PSMB4; PSMB10; PSMD4; PSMD10; PSMD13; PSMA1; PRKAR1A; PRKAR1B; PSMA5; PSMC1; PSMC3; PSMC4; PSMA7	5716; 5702; 5682; 5686; 5719; 5710; 5704; 1031; 5573; 5700; 5699; 5688; 5575; 5692	72	72
	0.00167698	0.00856266	Reduction of cytosolic Ca++ levels	Reactome	R-HSA-418359	ATP2B3; SRI; ATP2A1; ATP2A2; ATP2A3	492; 487; 6717; 488; 489	12	12
	0.00167698	0.00856266	CD28 dependent Vav1 pathway	Reactome	R-HSA-389359	GRB2; RAC1; FYN; PAK1; PAK3	2534; 5063; 5879; 2885; 5058	12	12
	0.00167698	0.00856266	RalA downstream regulated genes	Wikipathways	WP2290	YBX3; RAC2; RAC3; RALA; RAC1	5879; 5881; 5880; 5898; 8531	12	12
	0.00167698	0.00856266	Degradation of DVL	Reactome	R-HSA-4641258	RBX1; UBA52; RPS27A; UBB; UBC	7316; 7311; 9978; 7314; 6233	12	12
	0.00167698	0.00856266	Purine ribonucleoside monophosphate biosynthesis	Reactome	R-HSA-73817	PPAT; ADSS; IMPDH1; IMPDH2; GMPS	8833; 5471; 3614; 3615; 159	12	12
	0.00167698	0.00856266	how does salmonella hijack a cell	BioCarta	salmonellapathway	ARPC2; ARPC4; ACTR3; RAC1; ARPC1B	10109; 10095; 10093; 10096; 5879	12	12
	0.00171243	0.00872354	RNA Polymerase I Transcription	Reactome	R-HSA-73864	HDAC1; H2AFV; HIST1H2AC; CBX3; HIST1H2AJ; H2AFX; H2AFZ; HIST2H2AC; POLR2E; HIST1H2BA; HIST1H2AK; POLR2L; HIST1H2AE; HIST1H2AD; HIST2H2AA3; HIST2H2AA4; POLR2H; H2AFJ; HIST1H2AB	255626; 3065; 723790; 8330; 3014; 3013; 55766; 8335; 3012; 5437; 11335; 8338; 8337; 5434; 5441; 8331; 8334; 3015; 94239	114	113
	0.00171642	0.00872383	regulation of bad phosphorylation	BioCarta	badpathway	BCL2L1; BAX; KIT; YWHAH; PRKAR1A; PRKAR1B; PDPK1	3815; 5170; 581; 5573; 598; 7533; 5575	23	23
	0.00172043	0.00872422	Formation of TC-NER Pre-Incision Complex	Reactome	R-HSA-6781823	POLR2E; AQR; RBX1; RPS27A; POLR2G; CUL4A; UBA52; UBB; UBC; POLR2L; COPS7B; POLR2H	9716; 8451; 5434; 5441; 7316; 7311; 64708; 9978; 5437; 7314; 6233; 5436	57	57
	0.00173672	0.00878669	MAPK1/MAPK3 signaling	Reactome	R-HSA-5684996	PDGFRA; APBB1IP; RPS27A; EGFR; MAP2K2; MAP2K1; IQGAP1; ERBB4; NEFL; FYN; PEA15; MARK3; YWHAB; ERBB2; SRC; IL5RA; CSK; CAMK2D; UBC; CAMK2A; PPP5C; AKAP9; KIT; MET; UBA52; GRB2; UBB; PHB; RBX1	2064; 54518; 5605; 7529; 4233; 5536; 6714; 817; 4140; 5604; 815; 9978; 2534; 10142; 5245; 1956; 2885; 7311; 3815; 8826; 7314; 1445; 3568; 6233; 5156; 8682; 4747; 7316; 2066	203	202
	0.00178591	0.00901497	IL-7 signaling	INOH	None	PDGFRA; PIK3CD; EGFR; MAP2K2; MAP2K1; IKBKG; MAPKAPK3; YWHAQ; FYN; NLK; MAPK9; SRC; CSK; PRKAB1; CAMK2D; PRKCB; PRKCD; CAMK2A; PRKAR1A; PRKAR1B; RPS6KA6; KIT; MET; CDK5; PAK4; PDPK1; PAK1	1956; 1020; 5605; 815; 5580; 4233; 51701; 3815; 6714; 10971; 5573; 817; 5601; 5604; 2534; 5058; 8517; 10298; 5564; 5579; 7867; 5170; 1445; 5293; 5156; 5575; 27330	185	184
	0.00179921	0.00906148	Axon guidance - Homo sapiens (human)	KEGG	path:hsa04360	PPP3R1; PIK3CD; LIMK1; PLXNB2; FYN; PIK3R3; SRC; RAC2; RAC3; RAC1; CAMK2D; CAMK2A; CFL2; CFL1; SEMA3C; PARD3; ROCK1; ROCK2; PDK1; MET; CDK5; PAK4; PPP3CA; PAK3; PAK1; SSH3	5293; 5163; 1072; 1073; 6714; 23654; 4233; 54961; 5879; 5881; 9475; 10512; 815; 817; 56288; 2534; 8503; 10298; 3984; 5530; 5534; 5058; 5063; 6093; 5880; 1020	175	175
	0.00182289	0.0091143	Vibrio cholerae infection - Homo sapiens (human)	KEGG	path:hsa05110	ATP6V1F; ACTB; GNAS; PDIA4; ATP6AP1; ATP6V1C2; SEC61G; ATP6V1C1; SEC61B; ATP6V0D1; ACTG1	9601; 528; 537; 9114; 23480; 60; 71; 10952; 9296; 245973; 2778	50	50
	0.00182615	0.0091143	Signaling by RAS mutants	Reactome	R-HSA-6802949	SRC; APBB1IP; CSK; PHB; MAP2K2; MAP2K1; MARK3; YWHAB; IQGAP1	1445; 5245; 6714; 4140; 5605; 54518; 7529; 8826; 5604	36	36
	0.00182615	0.0091143	Gene and protein expression by JAK-STAT signaling after Interleukin-12 stimulation	Wikipathways	WP4100	CAPZA1; ANXA2; SNRPA1; AIP; LMNB1; RALA; CFL1; LCP1; PPIA	6627; 5478; 4001; 1072; 302; 3936; 5898; 9049; 829	36	36
	0.00182615	0.0091143	Selenoamino acid metabolism	EHMN	Selenoamino acid metabolism	AHCYL1; NUP107; NUP93; NUP37; NUP155; NUP214; NUP210; NUP205; RANBP2	9688; 23165; 10768; 5903; 23225; 57122; 8021; 79023; 9631	36	36
	0.00186994	0.0092702	Signaling by SCF-KIT	Reactome	R-HSA-1433557	SRC; STAT3; STAT1; RAC1; FYN; KIT; GRB2; PIK3R3; LYN; YES1	4067; 3815; 6772; 2534; 5879; 6714; 2885; 7525; 6774; 8503	43	43
	0.00186994	0.0092702	LKB1 signaling events	PID	lkb1_pathway	RPTOR; YWHAZ; CAB39; YWHAQ; SFN; YWHAH; SMARCD3; YWHAB; HSP90AA1; YWHAG	7532; 2810; 10971; 3320; 51719; 57521; 7534; 7529; 6604; 7533	43	43
	0.00186994	0.0092702	De novo fatty acid biosynthesis	EHMN	De novo fatty acid biosynthesis	NUP107; CTSA; NUP93; NUP37; NUP155; ELOVL1; NUP214; NUP210; NUP205; RANBP2	9688; 23165; 9631; 5903; 23225; 57122; 8021; 79023; 5476; 64834	43	43
	0.00192021	0.00949819	Signaling events mediated by Hepatocyte Growth Factor Receptor (c-Met)	PID	met_pathway	RPTOR; EPS15; CRKL; RAC1; PAK4; MET; SRC; MAP2K2; MAP2K1; GRB2; PXN; EIF4E; PDPK1; PAK1; SH3GL2	1399; 5170; 2060; 2885; 57521; 5879; 5829; 5605; 1977; 6714; 6456; 10298; 5604; 5058; 4233	82	81
	0.00197525	0.00974733	Ciliary landscape	Wikipathways	WP4352	HDAC1; DYNLL1; GLA; VAPB; AIMP1; EIF5B; IQGAP1; HTRA2; NEFM; NEFL; SMC4; EFTUD2; ARHGDIA; NFKB1; PSMC4; PSMC6; APMAP; NDUFA5; RAC1; CTSA; CAMK2A; GDI1; COPS7B; SNRPB2; ACSL3; SNAP29; PSMD13; VIM; LZTFL1; XPNPEP3	2717; 5476; 8655; 815; 57136; 10051; 9669; 64708; 396; 2664; 7431; 9255; 27429; 5879; 5706; 5704; 4790; 4741; 4747; 8826; 2181; 5719; 9342; 9343; 3065; 6629; 63929; 4698; 9217; 54585	213	213
	0.00198378	0.00974733	Hypusine synthesis from eIF5A-lysine	Reactome	R-HSA-204626	EIF5A2; DHPS; EIF5A	1984; 1725; 56648	4	4
	0.00198378	0.00974733	proline biosynthesis	HumanCyc	PROSYN-PWY	PYCR2; ALDH18A1; PYCR1	29920; 5832; 5831	4	4
	0.0020128	0.00986805	Iron uptake and transport	Reactome	R-HSA-917937	ATP6V1F; RPS27A; ATP6AP1; STEAP3; GLRX3; UBA52; TFRC; UBB; UBC; ATP6V1C2; ATP6V0D1; ATP6V1C1	9114; 7037; 537; 528; 7316; 7311; 245973; 10539; 55240; 7314; 6233; 9296	58	58
	0.00208756	0.0101005	Fructose Mannose metabolism	INOH	None	HK2; HK1; GMPPB; ALDOA; PMM2; GFPT1; GFPT2; ALDOC	3098; 5373; 226; 2673; 29925; 3099; 9945; 230	30	30
	0.00208756	0.0101005	vegf hypoxia and angiogenesis	BioCarta	vegfpathway	SRC; ACTA1; CSK; PRKCB; GRB2; PXN; HSP90AA1; PDPK1	5170; 1445; 6714; 3320; 58; 5829; 2885; 5579	30	30
	0.00208756	0.0101005	Extension of Telomeres	Reactome	R-HSA-180786	PCNA; RUVBL1; RUVBL2; RFC4; RPA1; RFC2; FEN1; RPA2	6118; 5111; 5982; 6117; 2237; 5984; 8607; 10856	30	30
	0.00208756	0.0101005	Mitophagy	Reactome	R-HSA-5205647	SRC; RPS27A; UBA52; CSNK2A2; ATG12; UBB; UBC; CSNK2B	6714; 7316; 9140; 7311; 1460; 7314; 6233; 1459	30	30
	0.00208756	0.0101005	Activation of BH3-only proteins	Reactome	R-HSA-114452	YWHAZ; DYNLL1; PPP3R1; YWHAQ; SFN; YWHAH; YWHAB; YWHAG	8655; 7532; 5534; 10971; 7534; 7529; 2810; 7533	30	30
	0.00208756	0.0101005	Regulation of Glucokinase by Glucokinase Regulatory Protein	Reactome	R-HSA-170822	NUP107; NUP93; NUP37; NUP155; NUP214; NUP210; NUP205; RANBP2	9688; 23165; 5903; 23225; 8021; 57122; 79023; 9631	30	30
	0.00209351	0.0101072	Kaposi sarcoma-associated herpesvirus infection - Homo sapiens (human)	KEGG	path:hsa05167	PPP3R1; BAX; MAP2K2; MAP2K1; IKBKG; STAT3; STAT1; GABARAPL2; PIK3CD; ATG3; PIK3R3; ICAM1; NFKB1; LYN; MAPK9; SRC; RAC1; GNB4; GNB1; GNB2; HCK; TBK1; CALML3; EIF2AK2; CASP8; UBB; PPP3CA	5293; 6714; 581; 6772; 6774; 7314; 4790; 2782; 2783; 5879; 810; 3383; 8517; 841; 8503; 4067; 5530; 5534; 64422; 29110; 59345; 5601; 5604; 5605; 11345; 5610; 3055	186	186
	0.00212573	0.0101759	Epigenetic regulation of gene expression	Reactome	R-HSA-212165	HDAC1; HIST1H2AK; HIST1H2AJ; HIST1H2AE; HIST1H2AD; CBX3; HIST1H2AC; HIST1H2AB; POLR2H; HIST2H2AA3; HIST2H2AA4; HIST2H2AC; H2AFV; POLR2E; BAZ1B; HIST1H2BA; POLR2L; UHRF1; DDX21; H2AFX; H2AFZ; ACTB; H2AFJ	255626; 723790; 8330; 3065; 9031; 3014; 8338; 3013; 55766; 29128; 9188; 60; 8335; 3012; 5437; 11335; 8337; 5434; 5441; 8331; 94239; 8334; 3015	151	150
	0.00212611	0.0101759	Acute myeloid leukemia - Homo sapiens (human)	KEGG	path:hsa05221	STAT3; SOS2; PIK3CD; MAP2K1; KIT; MAP2K2; CD14; GRB2; PIK3R3; IKBKG; PML; NFKB1; FLT3	2322; 2885; 5293; 8503; 8517; 929; 5371; 5604; 5605; 3815; 4790; 6774; 6655	66	66
	0.00212611	0.0101759	Non-small cell lung cancer - Homo sapiens (human)	KEGG	path:hsa05223	ERBB2; STAT3; SOS2; PIK3CD; PRKCB; EGFR; BAX; PIK3R3; MAP2K2; MAP2K1; GRB2; STK4; PDPK1	5170; 6655; 1956; 5293; 581; 6789; 5579; 2885; 8503; 5604; 2064; 5605; 6774	66	66
	0.00212611	0.0101759	Non-small cell lung cancer	Wikipathways	WP4255	ERBB2; STAT3; SOS2; EGFR; PRKCB; PIK3CD; BAX; PDK1; MAP2K2; MAP2K1; GRB2; STK4; PIK3R3	8503; 5605; 5293; 2885; 6789; 5604; 5163; 581; 1956; 5579; 6774; 6655; 2064	66	66
	0.00214285	0.010234	Glucose metabolism	Reactome	R-HSA-70326	PKLR; ADPGK; NUP107; HK2; PGK2; HK1; NUP93; NUP37; ALDOA; NUP155; NUP214; ALDOC; RANBP2; NUP210; NUP205; PGK1	5313; 23225; 57122; 3099; 9631; 5230; 5903; 79023; 3098; 9688; 5232; 23165; 230; 8021; 83440; 226	91	90
	0.0021576	0.0102382	Nuclear Envelope Breakdown	Reactome	R-HSA-2980766	LMNB1; NUP107; PRKCB; NUP93; NUP37; NUP155; NUP214; NUP210; LEMD2; NUP205; RANBP2	4001; 9688; 23165; 9631; 5903; 23225; 57122; 8021; 79023; 221496; 5579	51	51
	0.0021576	0.0102382	Amyotrophic lateral sclerosis (ALS) - Homo sapiens (human)	KEGG	path:hsa05014	BCL2L1; PPP3R1; CASP1; NEFM; NEFL; RAC1; NEFH; BAX; GPX1; PRPH; PPP3CA	4741; 4744; 4747; 5530; 5534; 834; 581; 5879; 598; 2876; 5630	51	51
	0.0021576	0.0102382	Aminosugars metabolism	EHMN	Aminosugars metabolism	COPE; NUP107; NUP93; NUP37; NUP155; NUP214; MGEA5; COPB2; NUP210; NUP205; RANBP2	9688; 23165; 57122; 5903; 23225; 11316; 8021; 79023; 10724; 9631; 9276	51	51
	0.0021768	0.0103073	PRC2 methylates histones and DNA	Reactome	R-HSA-212300	H2AFV; H2AFX; H2AFZ; HIST1H2BA; HIST1H2AC; HIST1H2AK; HIST1H2AJ; HIST1H2AE; HIST1H2AD; HIST2H2AA3; HIST2H2AA4; HIST2H2AC; H2AFJ; HIST1H2AB	3014; 8337; 723790; 3013; 8331; 55766; 8335; 3012; 8330; 8334; 3015; 8338; 94239; 255626	75	74
	0.0021937	0.0103431	Lamivudine Pathway, Pharmacokinetics/Pharmacodynamics	PharmGKB	PA165860384	PCYT1A; DCK; NME2; NT5C; PGK1; NME1	1633; 30833; 5230; 5130; 4830; 4831	18	18
	0.0021937	0.0103431	internal ribosome entry pathway	BioCarta	irespathway	CASP1; EIF4G2; EIF4G1; CASP8; EIF4E; EIF4A1	1977; 1982; 1973; 1981; 834; 841	18	18
	0.00222495	0.0103813	NoRC negatively regulates rRNA expression	Reactome	R-HSA-427413	HDAC1; H2AFV; HIST1H2AC; HIST1H2AJ; H2AFX; H2AFZ; HIST2H2AC; POLR2E; HIST1H2BA; HIST1H2AK; POLR2L; HIST1H2AE; HIST1H2AD; HIST2H2AA3; HIST2H2AA4; POLR2H; H2AFJ; HIST1H2AB	255626; 3065; 723790; 8330; 3014; 3013; 55766; 8335; 3012; 5437; 8338; 8337; 5434; 5441; 8331; 8334; 3015; 94239	108	107
	0.00224284	0.0103813	Regulation of mRNA stability by proteins that bind AU-rich elements	Reactome	R-HSA-450531	SET; ELAVL1; HSPB1; EIF4G1; HSPA8; PRKCD; NUP214; ANP32A; YWHAB	1994; 3312; 8125; 3315; 1981; 7529; 8021; 6418; 5580	37	37
	0.00224284	0.0103813	Squalene and cholesterol biosynthesis	EHMN	Squalene and cholesterol biosynthesis	NUP107; NUP93; PMVK; NUP37; NUP155; NUP214; NUP210; NUP205; RANBP2	9688; 10654; 23165; 5903; 23225; 57122; 8021; 79023; 9631	37	37
	0.00224771	0.0103813	Interleukin-3, 5 and GM-CSF signaling	Reactome	R-HSA-512988	YWHAZ; IL5RA; CRKL; FYN; PIK3CD; GRB2; PIK3R3; HCK; LYN; YES1	4067; 3568; 2534; 5293; 2885; 1399; 7534; 7525; 3055; 8503	44	44
	0.00224771	0.0103813	Interleukin-11 Signaling Pathway	Wikipathways	WP2332	SRC; STAT3; STAT1; FYN; MAP2K2; MAP2K1; GRB2; ICAM1; PDPK1; YES1	5605; 5604; 3383; 2885; 5170; 6714; 6774; 6772; 7525; 2534	44	44
	0.00225616	0.0103813	glycolysis	HumanCyc	PWY66-400	PKLR; HK2; HK1; ALDOA; ALDOC; PGK2; PGK1	3098; 5232; 226; 5313; 230; 5230; 3099	25	24
	0.00225616	0.0103813	Ephrin B reverse signaling	PID	ephrinbrevpathway	SRC; RAC1; FYN; DNM1; HCK; LYN; YES1	4067; 3055; 6714; 2534; 1759; 5879; 7525	24	24
	0.00225616	0.0103813	proteasome complex	BioCarta	proteasomepathway	RPN2; PSMD14; PSMA5; PSMA1; PSMA7; PSMD4; PSMB4	5682; 5686; 6185; 5710; 10213; 5688; 5692	24	24
	0.00228613	0.0103813	cell to cell adhesion signaling	BioCarta	cell2cellpathway	SRC; ACTA1; PXN; CSK	58; 6714; 5829; 1445	8	8
	0.00228613	0.0103813	Tenofovir/Adefovir Pathway, Pharmacokinetics	PharmGKB	PA155028030	AK2; NME1; NME2; AK4	204; 205; 4830; 4831	8	8
	0.00228613	0.0103813	Recycling of eIF2:GDP	Reactome	R-HSA-72731	EIF2S2; EIF2S1; EIF2S3; EIF2B1	1967; 1965; 8894; 1968	8	8
	0.00228613	0.0103813	cbl mediated ligand-induced downregulation of egf receptors pathway	BioCarta	cblpathway	SRC; GRB2; EGFR; PRKCB	6714; 1956; 2885; 5579	8	8
	0.00228613	0.0103813	Dual hijack model of Vif in HIV infection	Wikipathways	WP3300	CUL5; CBFB; UBB; RBX1	7314; 8065; 865; 9978	8	8
	0.00228613	0.0103813	Ubiquitin Mediated Degradation of Phosphorylated Cdc25A	Reactome	R-HSA-69601	UBA52; RPS27A; UBB; UBC	7316; 7311; 7314; 6233	8	8
	0.00228613	0.0103813	p53-Independent DNA Damage Response	Reactome	R-HSA-69610	UBA52; RPS27A; UBB; UBC	7316; 7311; 7314; 6233	8	8
	0.00228613	0.0103813	p53-Independent G1/S DNA damage checkpoint	Reactome	R-HSA-69613	UBA52; RPS27A; UBB; UBC	7316; 7311; 7314; 6233	8	8
	0.00228613	0.0103813	InlA-mediated entry of Listeria monocytogenes into host cells	Reactome	R-HSA-8876493	UBA52; RPS27A; UBB; UBC	7316; 7311; 7314; 6233	8	8
	0.00228613	0.0103813	Nef and signal transduction	Reactome	R-HSA-164944	HCK; FYN; ELMO1; RAC1	9844; 3055; 5879; 2534	8	8
	0.00234461	0.0106087	MHC class II antigen presentation	Reactome	R-HSA-2132295	HLA-DPB1; CTSL; SEC23A; CTSA; CTSB; CTSC; SEC24D; AP2A1; DNM3; AP2A2; DNM1; SH3GL2	161; 3115; 10484; 160; 1075; 6456; 1759; 1514; 9871; 1508; 26052; 5476	59	59
	0.00234579	0.0106087	Transcriptional Regulation by TP53	Reactome	R-HSA-3700989	HDAC1; RFC4; PRDX5; RPS27A; TACO1; BAX; CTDP1; TAF15; NDRG1; RPTOR; YWHAQ; POLR2H; YWHAH; YWHAB; NBN; PML; YWHAG; PIP4K2C; PCNA; YWHAZ; PRKAB1; PRMT1; CARM1; POLR2E; IGFBP3; POLR2G; COX7C; POLR2L; RFC2; CSNK2A2; TAF7; NELFCD; CASP1; GTF2F2; RPA1; TAF9; RPA2; SFN; UBA52; CDK5; UBB; UBC; PDPK1; STEAP3; RHEB; CSNK2B	6118; 6879; 5371; 6880; 55240; 1350; 1020; 1459; 834; 8148; 7316; 7533; 3065; 6117; 1460; 25824; 2810; 4683; 3486; 7311; 2963; 5436; 9150; 581; 10397; 5982; 7529; 5441; 6009; 7314; 5564; 5111; 6233; 51204; 7532; 10498; 57521; 5437; 3276; 5170; 51497; 5434; 7534; 5984; 10971; 79837	374	371
	0.00244691	0.0110435	Fc epsilon RI signaling pathway - Homo sapiens (human)	KEGG	path:hsa04664	RAC2; RAC3; RAC1; FYN; PIK3CD; MAP2K2; MAP2K1; GRB2; PIK3R3; PDPK1; LYN; MAPK9; SOS2	5605; 5293; 5170; 8503; 2885; 5601; 4067; 5604; 2534; 5879; 5880; 5881; 6655	68	67
	0.00246481	0.0111017	C-type lectin receptors (CLRs)	Reactome	R-HSA-5621481	SRC; AHCYL1; PPP3R1; TAB1; FYN; PRKCD; CASP8; PYCARD; CARD9; IKBKG; PPP3CA; NFKB1; LYN; PAK1; PAK3	4067; 4790; 5530; 6714; 8517; 10768; 10454; 841; 29108; 5580; 5534; 5063; 64170; 2534; 5058	83	83
	0.00251589	0.0113015	AndrogenReceptor	NetPath	Pathway_AndrogenReceptor	HDAC1; HSPA5; HSPA8; EGFR; HSP90B1; TOP1; STAT3; RAN; PXN; SRC; RAC3; HSPB1; PRMT1; CDK11B; APPL1; UBE2I; NELFCD; GTF2F2; CASP1; CASP8; CDK5; HSP90AA1	3065; 1956; 1020; 26060; 3309; 3312; 6714; 7184; 841; 7329; 984; 5881; 3315; 7150; 5901; 3276; 834; 51497; 3320; 5829; 2963; 6774	143	143
	0.00254487	0.0113015	attenuation of gpcr signaling	BioCarta	agpcrpathway	PRKCB; GNB1; PRKAR1A; PRKAR1B; GNAS	2778; 5575; 2782; 5573; 5579	13	13
	0.00254487	0.0113015	purine deoxyribonucleosides salvage	HumanCyc	PWY-7224	NME1-NME2; NME2; DCK; NME1; NME3	4832; 1633; 4830; 654364; 4831	13	13
	0.00254487	0.0113015	Receptor-ligand binding initiates the second proteolytic cleavage of Notch receptor	Reactome	R-HSA-156988	UBA52; RPS27A; UBB; NOTCH2; UBC	7316; 4853; 7311; 7314; 6233	13	13
	0.00254487	0.0113015	NF-kB is activated and signals survival	Reactome	R-HSA-209560	NFKB1; UBA52; RPS27A; UBB; UBC	7316; 7311; 7314; 6233; 4790	13	13
	0.00254487	0.0113015	Downregulation of ERBB2:ERBB3 signaling	Reactome	R-HSA-1358803	ERBB2; UBA52; RPS27A; UBB; UBC	7316; 7314; 6233; 2064; 7311	13	13
	0.00254487	0.0113015	Trafficking and processing of endosomal TLR	Reactome	R-HSA-1679131	CTSL; TLR8; CNPY3; CTSB; HSP90B1	51311; 10695; 1508; 7184; 1514	13	13
	0.00261733	0.0115769	Prostaglandin formation from dihomo gama-linoleic acid	EHMN	Prostaglandin formation from dihomo gama-linoleic acid	NUP107; NUP93; NUP37; NUP155; NUP214; NUP210; NUP205; RANBP2	9688; 23165; 5903; 23225; 57122; 8021; 79023; 9631	31	31
	0.00261733	0.0115769	Vitamin B5 - CoA biosynthesis from pantothenate	EHMN	Vitamin B5 - CoA biosynthesis from pantothenate	NUP107; NUP93; NUP37; NUP155; NUP214; NUP210; NUP205; RANBP2	9688; 23165; 5903; 23225; 57122; 79023; 8021; 9631	31	31
	0.00263946	0.0116515	Chemokine signaling pathway - Homo sapiens (human)	KEGG	path:hsa04062	CRKL; MAP2K1; IKBKG; STAT3; STAT1; PIK3CD; PIK3R3; PXN; NFKB1; LYN; SRC; RAC2; RAC1; GNB4; PRKCB; GNB1; PRKCD; GNB2; HCK; CXCL13; PARD3; SOS2; ROCK1; ROCK2; PAK1; GRB2; ELMO1	6714; 6772; 6774; 9844; 5293; 4790; 5879; 5880; 9475; 2782; 8503; 2783; 10563; 2885; 1399; 8517; 5058; 5579; 5580; 6093; 59345; 5829; 56288; 4067; 5604; 3055; 6655	189	189
	0.0026663	0.0117466	SUMOylation	Reactome	R-HSA-2990846	HDAC1; SMC1A; STAG1; NUP107; SUMO1; RPA1; SUMO2; NUP93; UBE2I; TOP1; PML; PCNA; NUP37; NUP155; NUP214; RAD21; RANBP2; NUP210; NUP205; SP100	7341; 3065; 57122; 23225; 9631; 6672; 5903; 6613; 8243; 7329; 9688; 23165; 7150; 10274; 79023; 8021; 5885; 5371; 5111; 6117	126	126
	0.00268445	0.0117797	Integrin-linked kinase signaling	PID	ilk_pathway	NACA; RUVBL1; RAC1; ARHGEF6; RUVBL2; ILKAP; PXN; HSP90AA1; RHOG; IQGAP1	4666; 3320; 391; 9459; 5829; 5879; 10856; 80895; 8826; 8607	45	45
	0.00268445	0.0117797	RAGE	NetPath	Pathway_RAGE	MAPK9; STAT3; EGFR; ROCK1; CASP8; PRKCD; MAP2K2; MAP2K1; NFKB1; MYD88	4790; 4615; 1956; 841; 6093; 5601; 5605; 6774; 5580; 5604	45	45
	0.00273173	0.0119164	Signaling by moderate kinase activity BRAF mutants	Reactome	R-HSA-6802946	SRC; APBB1IP; CSK; PHB; MAP2K2; MAP2K1; MARK3; YWHAB; IQGAP1	1445; 5245; 6714; 4140; 5605; 54518; 7529; 8826; 5604	38	38
	0.00273173	0.0119164	Paradoxical activation of RAF signaling by kinase inactive BRAF	Reactome	R-HSA-6802955	SRC; APBB1IP; CSK; PHB; MAP2K2; MAP2K1; MARK3; YWHAB; IQGAP1	1445; 5245; 54518; 6714; 4140; 5605; 7529; 8826; 5604	38	38
	0.00273173	0.0119164	Signaling events mediated by TCPTP	PID	tcptp_pathway	SRC; STAT3; STAT1; EIF2AK2; EGFR; EIF2A; MET; GRB2; LMAN1	83939; 6772; 6714; 1956; 2885; 5610; 6774; 3998; 4233	38	38
	0.00274899	0.0119681	Hepatitis B - Homo sapiens (human)	KEGG	path:hsa05161	ATP6AP1; BAX; MAP2K2; MAP2K1; IKBKG; VDAC3; YWHAZ; STAT3; TBK1; YWHAQ; PIK3CD; PIK3R3; YWHAB; NFKB1; MAPK9; PCNA; SRC; PRKCB; MYD88; STAT1; CASP8; GRB2	4615; 537; 6714; 581; 6772; 5293; 4790; 6774; 10971; 7419; 8503; 8517; 841; 7529; 7534; 2885; 29110; 5579; 5601; 5604; 5605; 5111	144	144
	0.00281221	0.0122193	MAPK signaling pathway - Homo sapiens (human)	KEGG	path:hsa04010	HSPA2; PDGFRA; MAP4K4; CRKL; HSPA8; EGFR; MAP2K2; MAP2K1; IKBKG; MAPKAPK3; FLT3; HSPA1L; PPM1B; RAC1; NFKB1; NLK; MYD88; ERBB2; RAC2; RAC3; ERBB4; HSPB1; PRKCB; STK3; STK4; MAPK9; SOS2; RPS6KA6; PPP5C; TAB1; KIT; MET; CD14; GRB2; GNA12; PPP3CA; PAK1; PPP3R1	4615; 2064; 2066; 5156; 2322; 6788; 6789; 4233; 5495; 4790; 7867; 27330; 10454; 2768; 3815; 9448; 3306; 3312; 3315; 5879; 5880; 51701; 2885; 5601; 1399; 5530; 5534; 5536; 929; 1956; 3305; 5058; 8517; 5579; 5881; 5604; 5605; 6655	295	295
	0.00293056	0.0127087	Toll Like Receptor 4 (TLR4) Cascade	Reactome	R-HSA-166016	MAPK9; UBB; TBK1; HMGB1; RPS27A; MAP2K1; CASP8; UBA52; CD14; TMEM189-UBE2V1; DNM1; IKBKG; DNM3; UBC; LY96; NFKB1; MYD88; MAPKAPK3; TAB1; UBE2V1	929; 1759; 4790; 4615; 841; 5601; 5604; 387522; 23643; 8517; 7311; 26052; 7314; 7867; 3146; 29110; 10454; 7316; 7335; 6233	127	127
	0.00297794	0.0128377	Estrogen signaling pathway - Homo sapiens (human)	KEGG	path:hsa04915	SRC; KRT28; HSPA2; GNAQ; GNAS; CALML3; EGFR; HSPA8; PIK3CD; PRKCD; HSP90B1; HSP90AB1; FKBP5; MAP2K1; GRB2; PIK3R3; KRT10; HSP90AA1; SOS2; MAP2K2; HSPA1L	7184; 6714; 5293; 2776; 2778; 3305; 3306; 3312; 2289; 810; 3326; 3858; 162605; 8503; 2885; 5605; 1956; 5580; 3320; 5604; 6655	137	136
	0.00298929	0.0128377	Processing of Intronless Pre-mRNAs	Reactome	R-HSA-77595	PABPN1; NCBP2; CSTF1; CSTF2; CPSF7; CPSF1	1478; 22916; 1477; 8106; 79869; 29894	19	19
	0.00298929	0.0128377	Ephrin signaling	Reactome	R-HSA-3928664	SRC; RAC1; FYN; GIT1; PAK1; PAK3	2534; 6714; 5063; 28964; 5058; 5879	19	19
	0.00298929	0.0128377	Nucleotide Metabolism	Wikipathways	WP404	PRPS2; ADSS; NME2; DHFR; IMPDH1; POLG	4831; 3614; 5428; 5634; 1719; 159	19	19
	0.00298929	0.0128377	role of mal in rho-mediated activation of srf	BioCarta	malpathway	ACTA1; RAC1; LIMK1; ROCK1; MAP2K2; MAP2K1	5605; 58; 6093; 5604; 3984; 5879	19	19
	0.00302586	0.0129696	Regulation of TP53 Activity through Phosphorylation	Reactome	R-HSA-6804756	TAF7; TAF15; PRKAB1; RFC4; RPS27A; RPA1; TAF9; RFC2; UBA52; NBN; UBB; UBC; RPA2; CSNK2B; CSNK2A2; CDK5	6118; 6879; 5982; 6117; 1460; 6880; 4683; 7311; 1020; 7314; 1459; 5564; 8148; 7316; 5984; 6233	93	93
	0.00303959	0.0130033	Negative epigenetic regulation of rRNA expression	Reactome	R-HSA-5250941	HDAC1; H2AFV; HIST1H2AC; HIST1H2AJ; H2AFX; H2AFZ; HIST2H2AC; POLR2E; HIST1H2BA; HIST1H2AK; POLR2L; HIST1H2AE; HIST1H2AD; HIST2H2AA3; HIST2H2AA4; POLR2H; H2AFJ; HIST1H2AB	255626; 3065; 723790; 8330; 3014; 3013; 55766; 8335; 3012; 5437; 8338; 8337; 5434; 5441; 8331; 8334; 3015; 94239	111	110
	0.0032077	0.0136697	Renal cell carcinoma - Homo sapiens (human)	KEGG	path:hsa05211	SOS2; CRKL; RAC1; PIK3CD; MAP2K2; MET; MAP2K1; GRB2; PIK3R3; PAK4; RBX1; PAK1; PAK3	4233; 5293; 5879; 10298; 5058; 2885; 5063; 8503; 5604; 5605; 1399; 9978; 6655	69	69
	0.0032077	0.0136697	Glycosphingolipid metabolism	EHMN	Glycosphingolipid metabolism	SGPL1; NUP107; GLA; COPE; NUP93; NUP37; NUP155; GLTP; NUP214; COPB2; NUP210; NUP205; RANBP2	9688; 23165; 57122; 2717; 5903; 23225; 8021; 51228; 79023; 11316; 8879; 9631; 9276	69	69
	0.00324656	0.0138088	Thrombin signalling through proteinase activated receptors (PARs)	Reactome	R-HSA-456926	SRC; GNAQ; GNB4; GNB1; GNB2; GNA14; GNA12; GNA13	2776; 9630; 6714; 2783; 2782; 10672; 59345; 2768	32	32
	0.00325645	0.0138243	Insulin signaling pathway - Homo sapiens (human)	KEGG	path:hsa04910	RPTOR; PKLR; MAPK9; PRKAR1B; CRKL; PRKAB1; HK2; HK1; PIK3CD; CALML3; MAP2K2; PTPRF; MAP2K1; GRB2; PIK3R3; PRKAR1A; GYS2; EIF4E; PDPK1; RHEB; SOS2	3098; 3099; 5170; 5792; 5293; 57521; 5313; 810; 8503; 2885; 1399; 6009; 2998; 1977; 5564; 5573; 5575; 5601; 5604; 5605; 6655	137	137
	0.00336092	0.0142405	RNA Polymerase I Promoter Clearance	Reactome	R-HSA-73854	HDAC1; H2AFV; HIST1H2AC; HIST1H2AJ; H2AFX; H2AFZ; HIST2H2AC; POLR2E; HIST1H2BA; HIST1H2AK; POLR2L; HIST1H2AE; HIST1H2AD; HIST2H2AA3; HIST2H2AA4; POLR2H; H2AFJ; HIST1H2AB	255626; 3065; 723790; 8330; 3014; 3013; 55766; 8335; 3012; 5437; 8338; 8337; 5434; 5441; 8331; 8334; 3015; 94239	112	111
	0.00337975	0.014293	Toll Like Receptor 9 (TLR9) Cascade	Reactome	R-HSA-168138	MAPK9; EEA1; HMGB1; RPS27A; UBA52; MAP2K1; TMEM189-UBE2V1; IKBKG; UBB; UBC; NFKB1; TLR8; MYD88; MAPKAPK3; TAB1; UBE2V1	51311; 4790; 8411; 4615; 5601; 5604; 387522; 8517; 7311; 7314; 7867; 3146; 10454; 7316; 7335; 6233	94	94
	0.00351644	0.0148427	Pathways in clear cell renal cell carcinoma	Wikipathways	WP4018	RPTOR; PKLR; PDGFRA; STAT3; CAMK1; HK1; EGFR; HK2; PLOD2; ALDOA; ACLY; ALDOC; RHEB; PGK2; PGK1	57521; 6009; 1956; 8536; 5156; 5313; 6774; 3098; 3099; 5230; 5232; 226; 230; 5352; 47	86	86
	0.00355643	0.014983	Death Receptor Signalling	Reactome	R-HSA-73887	HDAC1; RPS27A; AKAP13; SOS2; RAC1; ARHGEF6; MAGED1; TAB1; UBC; USP4; UBB; CASP8; UBA52; AATF; GNA13; RBCK1; ARHGDIA; NFKB1; NSMAF; MYD88; IKBKG	7375; 3065; 5879; 9500; 841; 4790; 4615; 8439; 10672; 6655; 10616; 9459; 8517; 7311; 7314; 26574; 396; 10454; 7316; 11214; 6233	141	138
	0.00357067	0.014986	tRNA processing	Reactome	R-HSA-72306	PUS1; NSUN2; XPOT; NUP107; RAN; TRNT1; PUS7; NUP93; NUP37; CSTF2; CPSF1; NUP155; THG1L; NUP214; NUP210; NUP205; RANBP2	11260; 23225; 57122; 9631; 1478; 5903; 79023; 9688; 23165; 80324; 51095; 8021; 54517; 29894; 5901; 54974; 54888	103	103
	0.00357067	0.014986	Reproduction	Reactome	R-HSA-1474165	SMC1A; H2AFV; HIST1H2AC; RAD21; STAG1; H2AFX; H2AFZ; HIST1H2BA; HIST1H2AK; HIST1H2AJ; HIST1H2AE; HIST1H2AD; HIST2H2AA3; HIST2H2AA4; HIST2H2AC; H2AFJ; HIST1H2AB	255626; 723790; 8330; 3014; 5885; 3013; 55766; 8243; 8335; 3012; 10274; 8338; 8337; 8331; 8334; 3015; 94239	104	103
	0.0036139	0.0151388	Methionine and cysteine metabolism	EHMN	Methionine and cysteine metabolism	COPB2; NUP107; COPE; NUP93; NUP37; NUP214; MPST; NUP155; PPIG; AHCY; NUP210; SLC43A2; NUP205; RANBP2	191; 9688; 124935; 23165; 9360; 5903; 23225; 57122; 11316; 8021; 79023; 4357; 9631; 9276	78	78
	0.00369747	0.0154015	Retrograde neurotrophin signalling	Reactome	R-HSA-177504	DNM1; SH3GL2; AP2A1; DNM3; AP2A2	160; 161; 6456; 26052; 1759	14	14
	0.00369747	0.0154015	Transcriptional regulation by the AP-2 (TFAP2) family of transcription factors	Wikipathways	WP4086	ERBB2; HSPD1; NOP2; EGFR; KIT	4839; 3815; 2064; 1956; 3329	14	14
	0.00369747	0.0154015	Activation of RAC1	Reactome	R-HSA-428540	PAK4; SOS2; RAC1; PAK1; PAK3	5058; 10298; 5063; 6655; 5879	14	14
	0.00371847	0.0154021	TLR ECSIT MEKK1 JNK	INOH	None	MYD88; TOLLIP; MAP2K1; MAP2K2; CD14; LY96; MAPK9	929; 23643; 5601; 4615; 5605; 54472; 5604	26	26
	0.00371847	0.0154021	TSH	NetPath	Pathway_TSH	GNAQ; HSPA5; GNAS; CALR; GNA12; GNA13; ATP1A1	2776; 476; 2778; 10672; 811; 3309; 2768	26	26
	0.00371847	0.0154021	EPO Receptor Signaling	Wikipathways	WP581	SRC; STAT3; STAT1; PDK1; MAP2K2; MAP2K1; GRB2	5605; 5604; 2885; 5163; 6714; 6774; 6772	26	26
	0.00376045	0.0154891	Endocrine and other factor-regulated calcium reabsorption - Homo sapiens (human)	KEGG	path:hsa04961	GNAQ; GNAS; PRKCB; ATP1A4; AP2A1; ATP1A2; DNM3; AP2A2; DNM1; ATP1A1	160; 161; 26052; 5579; 2776; 2778; 476; 477; 1759; 480	47	47
	0.00376045	0.0154891	XBP1(S) activates chaperone genes	Wikipathways	WP3472	SRPRB; HYOU1; PDIA6; PDIA5; SULT1A3; DNAJC3; SSR1; DNAJB11; GFPT1; ATP6V0D1	6818; 6745; 58477; 10954; 10525; 10130; 9114; 51726; 5611; 2673	47	47
	0.00376045	0.0154891	Nucleotide-binding domain, leucine rich repeat containing receptor (NLR) signaling pathways	Reactome	R-HSA-168643	BCL2L1; CASP1; TAB1; CASP8; HSP90AB1; CARD9; TMEM189-UBE2V1; IKBKG; PYCARD; UBE2V1	8517; 598; 7335; 10454; 29108; 3326; 834; 64170; 841; 387522	47	47
	0.00385273	0.0158105	polyadenylation of mrna	BioCarta	cpsfpathway	PABPN1; CSTF1; CPSF1; CSTF2	1478; 1477; 8106; 29894	9	9
	0.00385273	0.0158105	PTK6 Regulates RTKs and Their Effectors AKT1 and DOK1	Reactome	R-HSA-8849469	UBA52; RPS27A; UBB; UBC	7316; 7314; 6233; 7311	9	9
	0.00395995	0.0160354	Integrated Lung Cancer Pathway	Wikipathways	WP2512	ERBB2; PKLR; CSK; SRC; RAC1; POR; PDK1; MYD88; PAK1	5058; 4615; 5313; 1445; 5163; 6714; 5447; 5879; 2064	40	40
	0.00395995	0.0160354	Negative regulation of MAPK pathway	Reactome	R-HSA-5675221	RPS27A; PPP5C; UBC; MAP2K1; MAP2K2; UBA52; UBB; MARK3; YWHAB	5536; 7316; 7311; 4140; 5605; 7529; 7314; 6233; 5604	40	40
	0.00395995	0.0160354	ErbB2/ErbB3 signaling events	PID	erbb2erbb3pathway	ERBB2; SRC; STAT3; RAC1; DOCK7; MAP2K2; MAP2K1; GRB2; MAPK9	6714; 2064; 5879; 85440; 5601; 2885; 5605; 6774; 5604	40	40
	0.00395995	0.0160354	Microglia Pathogen Phagocytosis Pathway	Wikipathways	WP3937	RAC2; RAC3; RAC1; ARPC1B; PIK3CD; PIK3R3; HCK; LYN; SIGLEC7	8503; 5881; 5880; 4067; 5293; 3055; 10095; 27036; 5879	40	40
	0.00398205	0.0160354	Lagging Strand Synthesis	Reactome	R-HSA-69186	PCNA; RFC4; RPA1; RFC2; FEN1; RPA2	5984; 6118; 5982; 6117; 2237; 5111	20	20
	0.00398205	0.0160354	egf signaling pathway	BioCarta	egfpathway	STAT3; STAT1; PRKCB; EGFR; MAP2K1; GRB2	6772; 5604; 6774; 2885; 1956; 5579	20	20
	0.00398205	0.0160354	Hedgehog ligand biogenesis	Reactome	R-HSA-5358346	ERLEC1; RPS27A; UBA52; UBB; UBC; P4HB	7316; 7314; 6233; 27248; 5034; 7311	20	20
	0.00398715	0.0160354	integrin signaling pathway	BioCarta	integrinpathway	SRC; ACTA1; CSK; CRKL; FYN; ROCK1; GRB2; PXN	1445; 58; 2534; 5829; 1399; 2885; 6093; 6714	33	33
	0.00398715	0.0160354	EPHA forward signaling	PID	epha_fwdpathway	SRC; CRKL; FYN; ROCK1; CDK5; HCK; LYN; YES1	4067; 3055; 6714; 2534; 1020; 1399; 6093; 7525	33	33
	0.00398715	0.0160354	Formation of the HIV-1 Early Elongation Complex	Reactome	R-HSA-167158	NCBP2; NELFCD; GTF2F2; CTDP1; POLR2E; POLR2G; POLR2L; POLR2H	22916; 51497; 5434; 5441; 9150; 2963; 5437; 5436	33	33
	0.00398715	0.0160354	Formation of the Early Elongation Complex	Reactome	R-HSA-113418	NCBP2; NELFCD; GTF2F2; CTDP1; POLR2E; POLR2G; POLR2L; POLR2H	22916; 51497; 5434; 5441; 9150; 2963; 5437; 5436	33	33
	0.00410581	0.0164529	Chromatin modifying enzymes	Reactome	R-HSA-3247509	HDAC1; CARM1; HIST1H2AM; HIST1H2AL; HIST1H2AI; RPS2; HIST1H2AK; HIST1H2AJ; HIST1H2AE; HIST1H2AD; HIST1H2AG; HIST1H2AA; USP22; HIST1H2AC; HIST1H2AB; RUVBL1; RUVBL2; NFKB1; HIST2H2AA3; HIST2H2AA4; PRMT1; TRRAP; SMARCD3; HIST1H2BA; JMJD6; HIST2H2AB; HIST2H2AC; TBL1XR1; OGT; TAF9; ACTL6A; ACTL6B; ACTB; HIST3H2A; HIST1H2AH	8338; 723790; 8473; 8336; 86; 8330; 6880; 92815; 6604; 8607; 51412; 4790; 79718; 3013; 10498; 317772; 60; 8329; 8295; 6187; 85235; 8335; 3012; 3065; 3276; 255626; 221613; 23210; 23326; 8337; 8332; 8331; 8334; 10856; 8969	272	272
	0.00410581	0.0164529	Chromatin organization	Reactome	R-HSA-4839726	HDAC1; CARM1; HIST1H2AM; HIST1H2AL; HIST1H2AI; RPS2; HIST1H2AK; HIST1H2AJ; HIST1H2AE; HIST1H2AD; HIST1H2AG; HIST1H2AA; USP22; HIST1H2AC; HIST1H2AB; RUVBL1; RUVBL2; NFKB1; HIST2H2AA3; HIST2H2AA4; PRMT1; TRRAP; SMARCD3; HIST1H2BA; JMJD6; HIST2H2AB; HIST2H2AC; TBL1XR1; OGT; TAF9; ACTL6A; ACTL6B; ACTB; HIST3H2A; HIST1H2AH	8338; 723790; 8473; 8336; 86; 8330; 6880; 92815; 6604; 8607; 51412; 4790; 79718; 3013; 10498; 317772; 60; 8329; 8295; 6187; 85235; 8335; 3012; 3065; 3276; 255626; 221613; 23210; 23326; 8337; 8332; 8331; 8334; 10856; 8969	272	272
	0.00414583	0.0165723	LPA receptor mediated events	PID	lysophospholipid_pathway	SRC; GNAQ; RAC1; GNB1; EGFR; PRKCD; GNA14; GNA12; PXN; NFKB1; LYN; GNA13	4067; 2776; 9630; 4790; 6714; 1956; 5829; 5879; 2782; 10672; 5580; 2768	64	63
	0.00415055	0.0165723	Glioma - Homo sapiens (human)	KEGG	path:hsa05214	PDGFRA; SOS2; MAP2K2; CALML3; EGFR; PRKCB; PIK3CD; CAMK2A; BAX; CAMK2D; MAP2K1; GRB2; PIK3R3	5156; 810; 5293; 581; 815; 817; 8503; 2885; 5579; 1956; 5604; 5605; 6655	71	71
	0.00421711	0.0168077	Factors involved in megakaryocyte development and platelet production	Reactome	R-HSA-983231	HDAC1; CAPZB; DOCK8; EHD1; KIF1B; RAC1; KIF2A; KIF5B; DOCK7; KLC4; MAFK; CAPZA1; CDK5; PRKAR1B; KIF5A; KLC1; MAFG; KIF21A; MAFF; PRKAR1A	1020; 81704; 55605; 832; 3065; 3831; 23095; 3796; 85440; 5573; 5879; 10938; 23764; 3799; 89953; 7975; 829; 3798; 4097; 5575	131	131
	0.00422591	0.0168126	Mitotic Anaphase	Reactome	R-HSA-68882	SMC1A; LMNB1; DYNLL1; DYNC1LI2; BUB3; NUP107; AHCTF1; CENPF; STAG1; RANGAP1; NUP37; UBB; MAD1L1; UBA52; RPS27A; RAD21; UBC; ZW10; KIF2A; LEMD2; RANBP2	4001; 10274; 25909; 57122; 221496; 3796; 5885; 1783; 5903; 79023; 8243; 8655; 5905; 9183; 8379; 7311; 9184; 7314; 7316; 1063; 6233	140	140
	0.00440313	0.0174639	TRAF6 mediated induction of NFkB and MAP kinases upon TLR7/8 or 9 activation	Reactome	R-HSA-975138	MAPK9; HMGB1; RPS27A; UBA52; MAP2K1; TMEM189-UBE2V1; IKBKG; UBB; UBC; NFKB1; TLR8; MYD88; MAPKAPK3; TAB1; UBE2V1	51311; 4790; 4615; 5601; 5604; 387522; 8517; 7311; 7314; 7867; 3146; 10454; 7316; 7335; 6233	88	88
	0.00441327	0.0174639	agrin in postsynaptic differentiation	BioCarta	agrpathway	SRC; CTTN; RAC1; ARHGEF6; EGFR; ACTA1; PXN; PAK4; PAK1; PAK3	5063; 10298; 1956; 9459; 5829; 6714; 2017; 58; 5879; 5058	48	48
	0.00441327	0.0174639	Ceramide signaling pathway	PID	ceramide_pathway	MAP4K4; EIF2AK2; EIF2A; CASP8; PRKCD; MAP2K2; MAP2K1; BAX; NFKB1; NSMAF	83939; 4790; 581; 5610; 841; 5580; 8439; 5604; 5605; 9448	48	48
	0.00453459	0.017912	VEGF	INOH	None	PDGFRA; PIK3CD; EGFR; MAP2K2; MAP2K1; IKBKG; MAPKAPK3; FYN; NLK; MAPK9; SRC; CSK; PRKAB1; CAMK2D; PRKCB; PRKCD; CAMK2A; PRKAR1A; PRKAR1B; RPS6KA6; KIT; MET; CDK5; PAK4; PDPK1; PAK1	1956; 1020; 5605; 815; 5580; 4233; 51701; 3815; 6714; 5573; 817; 5601; 5604; 2534; 5058; 8517; 10298; 5564; 5579; 7867; 5170; 1445; 5293; 5156; 5575; 27330	188	187
	0.0045796	0.0180577	Regulation of nuclear beta catenin signaling and target gene transcription	PID	betacatenin_nuc_pathway	YWHAZ; HDAC1; TBL1XR1; RUVBL2; YWHAQ; TNIK; TRRAP; SFN; IGF2BP1; KRT1; YWHAB; CTBP1; YWHAG; YWHAH	7532; 3848; 1487; 23043; 10971; 79718; 7534; 8295; 3065; 7529; 2810; 10856; 7533; 10642	80	80
	0.00459804	0.0180875	Mitotic Metaphase and Anaphase	Reactome	R-HSA-2555396	SMC1A; LMNB1; DYNLL1; DYNC1LI2; BUB3; NUP107; AHCTF1; CENPF; STAG1; RANGAP1; NUP37; UBB; MAD1L1; UBA52; RPS27A; RAD21; UBC; ZW10; KIF2A; LEMD2; RANBP2	4001; 10274; 25909; 57122; 221496; 3796; 5885; 1783; 5903; 79023; 8243; 8655; 5905; 9183; 8379; 7311; 9184; 7314; 7316; 1063; 6233	141	141
	0.00465121	0.0180875	MyD88:Mal cascade initiated on plasma membrane	Reactome	R-HSA-166058	MAPK9; HMGB1; RPS27A; MAP2K1; CD14; TMEM189-UBE2V1; UBA52; IKBKG; UBB; UBC; LY96; NFKB1; MYD88; MAPKAPK3; TAB1; UBE2V1	929; 4790; 4615; 5601; 5604; 387522; 23643; 8517; 7311; 7314; 7867; 3146; 10454; 7316; 7335; 6233	97	97
	0.00465121	0.0180875	Toll Like Receptor TLR1:TLR2 Cascade	Reactome	R-HSA-168179	MAPK9; HMGB1; RPS27A; MAP2K1; CD14; TMEM189-UBE2V1; UBA52; IKBKG; UBB; UBC; LY96; NFKB1; MYD88; MAPKAPK3; TAB1; UBE2V1	929; 4790; 4615; 5601; 5604; 387522; 23643; 8517; 7311; 7314; 7867; 3146; 10454; 7316; 7335; 6233	97	97
	0.00465121	0.0180875	Toll Like Receptor TLR6:TLR2 Cascade	Reactome	R-HSA-168188	MAPK9; HMGB1; RPS27A; MAP2K1; CD14; TMEM189-UBE2V1; UBA52; IKBKG; UBB; UBC; LY96; NFKB1; MYD88; MAPKAPK3; TAB1; UBE2V1	929; 4790; 4615; 5601; 5604; 387522; 23643; 8517; 7311; 7314; 7867; 3146; 10454; 7316; 7335; 6233	97	97
	0.00465121	0.0180875	Toll Like Receptor 2 (TLR2) Cascade	Reactome	R-HSA-181438	MAPK9; HMGB1; RPS27A; MAP2K1; CD14; TMEM189-UBE2V1; UBA52; IKBKG; UBB; UBC; LY96; NFKB1; MYD88; MAPKAPK3; TAB1; UBE2V1	929; 4790; 4615; 5601; 5604; 387522; 23643; 8517; 7311; 7314; 7867; 3146; 10454; 7316; 7335; 6233	97	97
	0.00465121	0.0180875	Toll Like Receptor 3 (TLR3) Cascade	Reactome	R-HSA-168164	MAPK9; TBK1; HMGB1; RPS27A; UBA52; CASP8; MAP2K1; TMEM189-UBE2V1; IKBKG; UBB; UBC; NFKB1; MYD88; MAPKAPK3; TAB1; UBE2V1	4790; 4615; 841; 5601; 5604; 387522; 8517; 7311; 7314; 7867; 3146; 29110; 10454; 7316; 7335; 6233	97	97
	0.00465519	0.0180875	Signaling events mediated by HDAC Class I	PID	hdac_classi_pathway	UBE2I; HDAC1; STAT3; SUMO1; RANGAP1; RAN; FKBP3; NUP214; NFKB1; NUP210; RANBP2	7341; 7329; 5901; 3065; 5905; 4790; 2287; 5903; 23225; 6774; 8021	56	56
	0.00465519	0.0180875	Deadenylation-dependent mRNA decay	Reactome	R-HSA-429914	EIF4G1; LSM1; LSM2; LSM3; TTC37; EDC4; EIF4E; WDR61; EIF4A1; EIF4A3; EIF4A2	27257; 23644; 1974; 57819; 1973; 1977; 1981; 9775; 9652; 27258; 80349	56	56
	0.00466062	0.0180875	ATF6 (ATF6-alpha) activates chaperone genes	Wikipathways	WP2655	CALR; HSPA5; HSP90B1	811; 7184; 3309	5	5
	0.00469947	0.0181746	Clathrin derived vesicle budding	Reactome	R-HSA-421837	BLOC1S3; TFRC; TPD52; TXNDC5; HSPA8; ACBD3; CTSZ; CHMP2A; GOLGB1; GAK; AP3S1; GBF1; SH3GL2	2580; 3312; 27243; 7037; 2804; 8729; 64746; 1176; 1522; 388552; 7163; 6456; 81567	72	72
	0.00469947	0.0181746	trans-Golgi Network Vesicle Budding	Reactome	R-HSA-199992	BLOC1S3; TFRC; TPD52; TXNDC5; HSPA8; ACBD3; CTSZ; CHMP2A; GOLGB1; GAK; AP3S1; GBF1; SH3GL2	2580; 3312; 27243; 7037; 2804; 8729; 64746; 1176; 1522; 388552; 7163; 6456; 81567	72	72
	0.00485149	0.0186324	Signaling by high-kinase activity BRAF mutants	Reactome	R-HSA-6802948	SRC; APBB1IP; CSK; MAP2K2; MAP2K1; MARK3; YWHAB; IQGAP1	1445; 54518; 6714; 4140; 5605; 7529; 8826; 5604	34	34
	0.00485149	0.0186324	African trypanosomiasis - Homo sapiens (human)	KEGG	path:hsa05143	IL18; GNAQ; HPR; PRKCB; THOP1; VCAM1; ICAM1; MYD88	4615; 3606; 7064; 3250; 3383; 5579; 2776; 7412	35	34
	0.00485149	0.0186324	COPI-independent Golgi-to-ER retrograde traffic	Reactome	R-HSA-6811436	CAPZB; CAPZA1; DYNLL1; RAB3GAP1; AGPAT3; DCTN4; DYNC1LI2; PAFAH1B3	8655; 51164; 5050; 56894; 1783; 832; 829; 22930	34	34
	0.00485149	0.0186324	Nuclear Pore Complex (NPC) Disassembly	Reactome	R-HSA-3301854	NUP107; NUP93; NUP37; NUP155; NUP214; NUP210; NUP205; RANBP2	9688; 23165; 9631; 5903; 23225; 57122; 8021; 79023	34	34
	0.0048686	0.0186658	Insulin Signaling	Wikipathways	WP481	MAP4K4; EHD1; MAP2K2; MAP2K1; STXBP2; MINK1; PIK3CD; PIK3R3; MAPK9; RAC2; RAC1; PRKCB; PRKCD; GYS2; EIF4E; SOS2; RPS6KA6; KIF5B; STXBP3; PTPRF; GRB2; PDPK1; RHEB	5170; 50488; 3799; 6009; 2998; 6655; 5605; 5604; 5601; 5580; 5579; 5879; 8503; 2885; 6814; 5792; 27330; 6813; 5293; 5880; 10938; 9448; 1977	160	160
	0.00491026	0.018793	Signaling by NTRKs	Reactome	R-HSA-166520	SRC; STAT3; CRKL; RAC1; FYN; GRB2; DNM1; CDK5; DNM3; AP2A2; YWHAB; AP2A1; MAPKAPK3; RALA; SH3GL2	2534; 1759; 1020; 1399; 7529; 6456; 6714; 5879; 161; 2885; 7867; 26052; 160; 5898; 6774	89	89
	0.00515212	0.0194615	Antigen processing-Cross presentation	Reactome	R-HSA-1236975	TAP1; CTSL; CALR; CD14; IKBKG; LY96; SEC61G; MYD88; SEC61B; FCGR1B	929; 23480; 23643; 4615; 8517; 6890; 1514; 811; 10952; 2210	49	49
	0.0051529	0.0194615	B Cell Receptor Signaling Pathway	Wikipathways	WP23	RAC2; CRKL; RAC1; PRKCB; FYN; PRKCD; CAMK2A; MAP2K2; MAP2K1; GRB2; IKBKG; NFKB1; PDPK1; LYN; MAPK9; PIK3AP1	5170; 5580; 815; 5605; 5604; 5601; 1399; 8517; 118788; 5579; 5879; 4067; 2885; 5880; 4790; 2534	98	98
	0.0051529	0.0194615	Processing of DNA double-strand break ends	Reactome	R-HSA-5693607	UBE2I; RPS27A; SUMO1; RPA1; PPP4C; SUMO2; H2AFX; RFC2; UBA52; RFC4; HIST1H2BA; UBB; UBC; UBE2V2; RPA2; NBN	6118; 5982; 6117; 255626; 7316; 3014; 7336; 6613; 5531; 4683; 7329; 7311; 7314; 7341; 5984; 6233	99	98
	0.00518105	0.0194615	Regulation of innate immune responses to cytosolic DNA	Reactome	R-HSA-3134975	UBA52; RPS27A; TBK1; UBB; UBC	7316; 7311; 7314; 6233; 29110	15	15
	0.00518105	0.0194615	GLI3 is processed to GLI3R by the proteasome	Reactome	R-HSA-5610785	RBX1; UBA52; RPS27A; UBB; UBC	7316; 7311; 9978; 7314; 6233	15	15
	0.00518105	0.0194615	Degradation of GLI2 by the proteasome	Reactome	R-HSA-5610783	RBX1; UBA52; RPS27A; UBB; UBC	7316; 7311; 9978; 7314; 6233	15	15
	0.00518105	0.0194615	Degradation of GLI1 by the proteasome	Reactome	R-HSA-5610780	RBX1; UBA52; RPS27A; UBB; UBC	7316; 7311; 9978; 7314; 6233	16	15
	0.00518105	0.0194615	Regulation of sister chromatid separation at the metaphase-anaphase transition	Wikipathways	WP4240	MAD1L1; SMC1A; STAG1; BUB3; RAD21	8379; 9184; 10274; 5885; 8243	15	15
	0.00519911	0.0194615	pkc-catalyzed phosphorylation of inhibitory phosphoprotein of myosin phosphatase	BioCarta	myosinpathway	GNAQ; PRKCB; GNB1; ROCK1; GNA12; GNA13	2776; 10672; 6093; 5579; 2782; 2768	23	21
	0.00519911	0.0194615	Interferon alpha-beta signaling	Wikipathways	WP1835	IFITM1; SAMHD1; GBP2; IFI35; ISG20; IFIT3	3430; 2634; 3669; 3437; 25939; 8519	21	21
	0.00519911	0.0194615	PCNA-Dependent Long Patch Base Excision Repair	Reactome	R-HSA-5651801	PCNA; RFC4; RPA1; RFC2; FEN1; RPA2	5984; 6118; 5982; 6117; 2237; 5111	21	21
	0.00519911	0.0194615	TSLP	NetPath	Pathway_TSLP	STAT3; STAT1; MAP2K1; EIF4E; NFKB1; MAPK9	6772; 5604; 5601; 6774; 4790; 1977	21	21
	0.00519911	0.0194615	regulation of pgc-1a	BioCarta	pgc1apathway	CAMK2D; SLC2A14; CAMK2A; CAMKK2; YWHAH; PPP3CA	144195; 10645; 815; 5530; 7533; 817	21	21
	0.00531886	0.0198428	Insulin resistance - Homo sapiens (human)	KEGG	path:hsa04931	CPT1A; MAPK9; STAT3; RPS6KA6; PRKAB1; OGT; PRKCB; PIK3CD; PRKCD; PTPRF; GYS2; PIK3R3; PDPK1; NFKB1; GFPT2; GFPT1; MGEA5	5170; 2673; 6774; 5792; 5293; 4790; 27330; 9945; 8473; 8503; 1374; 2998; 5564; 5579; 5580; 5601; 10724	107	107
	0.00531886	0.0198428	Purine nucleotides nucleosides metabolism	INOH	None	PKLR; NUDT5; PAPSS2; PRPS2; NME1; NME2; NME3; NME1-NME2; NT5C; IMPDH1; IMPDH2; AK4; TYMP; PPAT; ADSS; AK2; GMPS	654364; 5313; 4831; 4832; 30833; 205; 4830; 1890; 8833; 204; 3614; 9060; 159; 5471; 5634; 11164; 3615	108	107
	0.00535698	0.0199467	Caspase Cascade in Apoptosis	PID	caspase_pathway	BCL2L1; ACTA1; LIMK1; BAX; VIM; TOP1; LMNB1; ARHGDIB; CFL2; CASP8; DIABLO	4001; 397; 581; 58; 7431; 3984; 1073; 598; 56616; 841; 7150	57	57
	0.00539174	0.0199467	Oncostatin M Signaling Pathway	Wikipathways	WP2374	SRC; STAT3; STAT1; PRKCB; PRKCD; MAP2K2; MAP2K1; GRB2; PXN; NFKB1; MAPK9; SERPINE1	5054; 5605; 5604; 5601; 2885; 5580; 5829; 4790; 6714; 5579; 6772; 6774	65	65
	0.00539174	0.0199467	MAP kinase activation	Reactome	R-HSA-450294	TAB1; RPS27A; UBA52; MAP2K1; TMEM189-UBE2V1; IKBKG; UBB; UBC; NFKB1; MAPK9; MAPKAPK3; UBE2V1	7867; 4790; 5604; 8517; 10454; 7316; 7311; 5601; 7335; 7314; 6233; 387522	65	65
	0.00539174	0.0199467	Interleukin-17 signaling	Reactome	R-HSA-448424	TAB1; RPS27A; UBA52; MAP2K1; TMEM189-UBE2V1; IKBKG; UBB; UBC; NFKB1; MAPK9; MAPKAPK3; UBE2V1	7867; 4790; 5604; 8517; 10454; 7316; 7311; 5601; 7335; 7314; 6233; 387522	65	65
	0.00539174	0.0199467	Mitophagy - animal - Homo sapiens (human)	KEGG	path:hsa04137	BCL2L1; SRC; RHOT2; TBK1; GABARAPL2; CSNK2A2; RHOT1; UBB; TBC1D17; MAPK9; CSNK2B; TBC1D15	64786; 7314; 1459; 1460; 29110; 6714; 11345; 89941; 598; 5601; 79735; 55288	65	65
	0.00546374	0.0201458	MyD88 dependent cascade initiated on endosome	Reactome	R-HSA-975155	MAPK9; HMGB1; RPS27A; UBA52; MAP2K1; TMEM189-UBE2V1; IKBKG; UBB; UBC; NFKB1; TLR8; MYD88; MAPKAPK3; TAB1; UBE2V1	51311; 4790; 4615; 5601; 5604; 387522; 8517; 7311; 7314; 7867; 3146; 10454; 7316; 7335; 6233	90	90
	0.00546374	0.0201458	Toll Like Receptor 7/8 (TLR7/8) Cascade	Reactome	R-HSA-168181	MAPK9; HMGB1; RPS27A; UBA52; MAP2K1; TMEM189-UBE2V1; IKBKG; UBB; UBC; NFKB1; TLR8; MYD88; MAPKAPK3; TAB1; UBE2V1	51311; 4790; 4615; 5601; 5604; 387522; 8517; 7311; 7314; 7867; 3146; 10454; 7316; 7335; 6233	90	90
	0.00569772	0.0209737	Cargo recognition for clathrin-mediated endocytosis	Reactome	R-HSA-8856825	EPS15; RPS27A; UBC; TFRC; NECAP2; SH3GL1; STAM2; ITSN2; EGFR; UBA52; GRB2; AP2A1; UBB; AP2A2; COPS7B; SH3GL2	7037; 1956; 2885; 64708; 10254; 6456; 55707; 161; 50618; 2060; 7311; 7314; 6455; 160; 7316; 6233	99	99
	0.00580676	0.0212691	Recycling pathway of L1	Reactome	R-HSA-437239	SRC; RPS6KA6; DNM1; DNM3; AP2A2; AP2A1; SH3GL2	161; 160; 6714; 1759; 26052; 6456; 27330	29	28
	0.00580676	0.0212691	Processing of Capped Intronless Pre-mRNA	Reactome	R-HSA-75067	PABPN1; SNRPD3; NCBP2; CSTF1; CSTF2; CPSF7; CPSF1	1478; 22916; 79869; 1477; 6634; 29894; 8106	28	28
	0.00580676	0.0212691	IL8- and CXCR1-mediated signaling events	PID	il8cxcr1_pathway	PRKCB; GNB1; GNA14; DNM1; HCK; PDPK1; LYN	4067; 5170; 9630; 3055; 1759; 2782; 5579	28	28
	0.00601313	0.021773	IRE1alpha activates chaperones	Reactome	R-HSA-381070	SEC61G; SEC61B; HSPA5; SEC63	3309; 23480; 11231; 10952	10	10
	0.00601313	0.021773	NS1 Mediated Effects on Host Pathways	Reactome	R-HSA-168276	PABPN1; EIF2AK2; KPNA3; KPNA1	5610; 3839; 8106; 3836	10	10
	0.00601313	0.021773	Removal of the Flap Intermediate from the C-strand	Reactome	R-HSA-174437	PCNA; FEN1; RPA1; RPA2	6118; 6117; 2237; 5111	10	10
	0.00601313	0.021773	regulation of transcriptional activity by pml	BioCarta	pmlpathway	UBE2I; PML; SUMO1; SP100	6672; 7329; 5371; 7341	10	10
	0.00601313	0.021773	Degradation of AXIN	Reactome	R-HSA-4641257	UBA52; RPS27A; UBB; UBC	7316; 7311; 6233; 7314	10	10
	0.00601313	0.021773	SCF-beta-TrCP mediated degradation of Emi1	Reactome	R-HSA-174113	UBA52; RPS27A; UBB; UBC	7316; 7311; 7314; 6233	10	10
	0.00601313	0.021773	Folding of actin by CCT/TriC	Reactome	R-HSA-390450	CCT2; ACTB; CCT7; CCT6B	10574; 10693; 10576; 60	10	10
	0.00606656	0.0219306	Amino Acid metabolism	Wikipathways	WP3925	PDHX; PYCR1; IARS; VARS; IDH1; WARS; GCLM; ACAA1; RARS; MPST; ACLY; ALDH18A1; CPS1; MCCC1; CAD	3417; 7453; 1373; 56922; 5917; 790; 4357; 30; 8050; 3376; 7407; 2730; 47; 5832; 5831	91	91
	0.00613966	0.0221588	Viral myocarditis - Homo sapiens (human)	KEGG	path:hsa05416	HLA-DPB1; RAC2; ACTG1; RAC1; EIF4G2; EIF4G1; FYN; CASP8; ICAM1; ACTB; RAC3	3115; 60; 1981; 1982; 71; 841; 3383; 2534; 5879; 5880; 5881	59	58
	0.00653742	0.0235177	anthrax toxin mechanism of action	BioCarta	anthraxpathway	MAP2K2; MAP2K1	5604; 5605	2	2
	0.00653742	0.0235177	protein <i>O</i>-[<i>N</i>-acetyl]-glucosylation	HumanCyc	PWY-7437	OGT; MGEA5	10724; 8473	2	2
	0.00656495	0.0235785	Fas Ligand (FasL) pathway and Stress induction of Heat Shock Proteins (HSP) regulation	Wikipathways	WP314	LMNB1; ACTG1; HSPB1; CASP8; ACTA1; ARHGDIB; ACTB; MAPKAPK3; PAK1	397; 4001; 7867; 71; 3315; 60; 58; 841; 5058	43	43
	0.00666782	0.0238706	Extracellular vesicles in the crosstalk of cardiac cells	Wikipathways	WP4300	PDLIM5; CD63; HSPB1; EGFR; SPP1; STAT3	1956; 3315; 967; 6774; 10611; 6696	22	22
	0.00666782	0.0238706	The human immune response to tuberculosis	Wikipathways	WP4197	TAP1; IFITM1; STAT1; IFI35; MX1; IFIT3	6890; 3430; 3437; 4599; 8519; 6772	22	22
	0.00674979	0.0241251	Hepatitis C - Homo sapiens (human)	KEGG	path:hsa05160	EGFR; BAX; MX1; MAP2K2; MAP2K1; IKBKG; EIF2S1; YWHAZ; STAT3; TBK1; YWHAQ; PIK3CD; YWHAH; PIK3R3; YWHAB; NFKB1; YWHAG; SOS2; STAT1; EIF2AK2; CASP8; GRB2	5293; 581; 6772; 6774; 7533; 4790; 10971; 8503; 8517; 841; 7529; 7532; 7534; 2885; 1956; 1965; 29110; 5604; 5605; 5610; 4599; 6655	155	155
	0.0069178	0.0246008	Cytosolic sensors of pathogen-associated DNA	Reactome	R-HSA-1834949	TBK1; HMGB1; RPS27A; UBA52; IFI16; IKBKG; UBB; UBC; NFKB1; MYD88	3146; 3428; 4615; 8517; 4790; 7316; 7311; 29110; 7314; 6233	51	51
	0.00691827	0.0246008	FGF	INOH	None	YWHAZ; SOS2; YWHAQ; PIK3CD; PRKCD; MAP2K1; SFN; MAP2K2; YWHAH; GRB2; YWHAB; YWHAG	7532; 5293; 2885; 7534; 7533; 6655; 10971; 7529; 2810; 5580; 5604; 5605	67	67
	0.0069273	0.0246008	T cell receptor signaling pathway - Homo sapiens (human)	KEGG	path:hsa04660	PPP3CA; SOS2; PPP3R1; FYN; PIK3CD; MAP2K2; MAP2K1; GRB2; PIK3R3; IKBKG; NFKB1; PAK4; PDPK1; MAPK9; PAK1; PAK3	5170; 10298; 2885; 5293; 4790; 8503; 8517; 2534; 5530; 5534; 5058; 5063; 5601; 5604; 5605; 6655	101	101
	0.0069273	0.0246008	Pyrimidine metabolism - Homo sapiens (human)	KEGG	path:hsa00240	DCK; NME1; NME2; NME3; NME1-NME2; CMPK2; DPYD; TYMP; POLR2H; POLR2E; POLR2G; DTYMK; POLR2L; CAD; NT5C; CTPS2	654364; 129607; 30833; 56474; 4830; 4831; 4832; 1806; 790; 1841; 5434; 5436; 5441; 1890; 5437; 1633	101	101
	0.00700264	0.0247274	roles of arrestin dependent recruitment of src kinases in gpcr signaling	BioCarta	barrestinsrcpathway	SRC; GNAS; FPR1; GNB1; MAP2K2; MAP2K1; DNM1; HCK	2778; 6714; 1759; 2357; 2782; 5605; 3055; 5604	36	36
	0.00700264	0.0247274	IL1-mediated signaling events	PID	il1pathway	TOLLIP; CASP1; TAB1; TMEM189-UBE2V1; IKBKG; UBE2V1; NFKB1; MYD88	4790; 4615; 8517; 10454; 7335; 54472; 387522; 834	36	36
	0.00700264	0.0247274	IGF signaling	INOH	None	SOS2; IGFBP3; PIK3CD; MAP2K2; MAP2K1; GRB2; IGFBP1; PDPK1	5293; 5170; 3486; 2885; 5605; 6655; 3484; 5604	36	36
	0.00700936	0.0247274	Kit receptor signaling pathway	Wikipathways	WP304	SRC; STAT3; STAT1; CRKL; PRKCB; FYN; KIT; MAP2K2; MAP2K1; GRB2; LYN	5605; 5604; 4067; 2885; 6714; 1399; 3815; 6772; 5579; 6774; 2534	59	59
	0.00704107	0.0247274	Omega-3 fatty acid metabolism	EHMN	Omega-3 fatty acid metabolism	ACSL3; ACAA1; ELOVL1; ACSL4; ACOX3	2182; 30; 2181; 8310; 64834	16	16
	0.00704107	0.0247274	Defective CFTR causes cystic fibrosis	Reactome	R-HSA-5678895	UBA52; RPS27A; ERLEC1; UBB; UBC	7316; 7311; 7314; 6233; 27248	16	16
	0.00704107	0.0247274	Cellular response to heat stress	Wikipathways	WP3395	SERPINH1; DNAJB1; HSPH1; UBB; HSPB1	10808; 7314; 871; 3337; 3315	16	16
	0.00750502	0.0262735	Viral Acute Myocarditis	Wikipathways	WP4298	BCL2L1; SRC; RAC2; RAC3; STAT1; EIF4G2; EIF4G1; FYN; BAX; CASP8; PYCARD; STAT3; ACTB	598; 60; 1981; 5881; 5880; 6714; 1982; 581; 841; 6774; 6772; 29108; 2534	76	76
	0.00750502	0.0262735	Chronic myeloid leukemia - Homo sapiens (human)	KEGG	path:hsa05220	HDAC1; BCL2L1; SOS2; CRKL; PIK3CD; BAX; MAP2K2; MAP2K1; GRB2; PIK3R3; IKBKG; CTBP1; NFKB1	5605; 1487; 3065; 2885; 5293; 4790; 8503; 8517; 598; 5604; 581; 1399; 6655	76	76
	0.00763044	0.0266704	Herpes simplex infection - Homo sapiens (human)	KEGG	path:hsa05168	TAP1; IKBKG; EIF2S1; SRSF5; SRSF4; EEF1D; STAT1; SRSF2; SRSF9; SRSF8; C1QBP; PML; NFKB1; MAPK9; HLA-DPB1; NXF1; ALYREF; CSNK2A2; MYD88; TBK1; TAB1; EIF2AK2; CASP8; CSNK2B; SP100	4615; 3115; 6672; 6772; 10929; 4790; 708; 10454; 6890; 10482; 5371; 6427; 6429; 6430; 8517; 5601; 841; 1936; 1965; 1459; 1460; 29110; 10189; 5610; 8683	185	185
	0.00767715	0.0267914	Separation of Sister Chromatids	Reactome	R-HSA-2467813	SMC1A; RPS27A; DYNLL1; UBB; BUB3; NUP107; AHCTF1; CENPF; STAG1; RANGAP1; NUP37; MAD1L1; UBA52; DYNC1LI2; UBC; RAD21; KIF2A; ZW10; RANBP2	10274; 25909; 57122; 3796; 5885; 1783; 5903; 79023; 8243; 8655; 5905; 9183; 8379; 7311; 9184; 7314; 7316; 1063; 6233	129	129
	0.00779941	0.0271326	RAC1-PAK1-p38-MMP2 Pathway	Wikipathways	WP3303	ERBB2; SRC; STAT3; RAC1; EGFR; BAX; GRB2; IKBKG; NFKB1; MAPK9; PAK1; PXN	5058; 2885; 5829; 8517; 581; 6714; 4790; 6774; 1956; 5601; 5879; 2064	68	68
	0.00779941	0.0271326	Glycolysis / Gluconeogenesis - Homo sapiens (human)	KEGG	path:hsa00010	ALDH3B2; ALDH3B1; ALDH3A1; PKLR; HK2; HK1; AKR1A1; ADPGK; ALDOA; ALDOC; PGK2; PGK1	10327; 218; 3098; 83440; 3099; 221; 222; 5313; 226; 230; 5230; 5232	68	68
	0.00796002	0.0276047	snRNP Assembly	Reactome	R-HSA-191859	SNRPD3; NCBP2; NUP107; NUP93; NUP37; NUP155; NUP214; NUP210; NUP205; RANBP2	9688; 22916; 23165; 6634; 5903; 23225; 57122; 8021; 79023; 9631	52	52
	0.00796002	0.0276047	Metabolism of non-coding RNA	Reactome	R-HSA-194441	SNRPD3; NCBP2; NUP107; NUP93; NUP37; NUP155; NUP214; NUP210; NUP205; RANBP2	9688; 22916; 23165; 6634; 5903; 23225; 57122; 8021; 79023; 9631	52	52
	0.00816019	0.0282547	Mitotic Prometaphase	Reactome	R-HSA-68877	DYNLL1; AHCTF1; TUBB; KIF2A; MAD1L1; RAD21; SMC4; YWHAG; RANBP2; SMC1A; BUB3; NUP107; CENPF; STAG1; RANGAP1; DYNC1LI2; ZW10; CSNK2A2; AKAP9; NUP37; TUBG1; TUBG2; NCAPG; HSP90AA1; CSNK2B	8655; 10274; 25909; 1063; 64151; 57122; 1460; 3796; 5885; 1783; 5903; 79023; 8243; 10142; 5905; 7532; 8379; 9183; 10051; 9184; 1459; 27175; 3320; 7283; 203068	186	186
	0.00820203	0.0283552	NF-kappa B signaling pathway - Homo sapiens (human)	KEGG	path:hsa04064	BCL2L1; UBE2I; TRIM25; TAB1; PRKCB; CSNK2B; CD14; VCAM1; ICAM1; LY96; NFKB1; LYN; MYD88; CSNK2A2; IKBKG	4615; 7706; 598; 23643; 7329; 4790; 10454; 7412; 3383; 8517; 929; 1459; 1460; 5579; 4067	95	94
	0.00831569	0.0286587	Aldosterone-regulated sodium reabsorption - Homo sapiens (human)	KEGG	path:hsa04960	PRKCB; PIK3CD; SFN; ATP1A4; PIK3R3; ATP1A2; ATP1A1; PDPK1	5293; 5170; 8503; 5579; 476; 477; 480; 2810	37	37
	0.00831569	0.0286587	Nucleobase catabolism	Reactome	R-HSA-8956319	SAMHD1; DPYD; NUDT1; NT5C; NUDT5; GPX1; TYMP; NUDT16	25939; 131870; 1890; 4521; 11164; 1806; 30833; 2876	37	37
	0.00836176	0.0287728	Leukotriene metabolism	EHMN	Leukotriene metabolism	NUP107; ACSL3; DHRS4; ALDH3A1; NUP93; ACSL4; ACAA1; MGST1; DHRS4L1; NUP155; ACOX3; NUP214; NUP37; NUP210; NUP205; RANBP2	728635; 9688; 23225; 57122; 9631; 5903; 2182; 79023; 2181; 4257; 23165; 10901; 218; 8021; 30; 8310	105	103
	0.00841537	0.0287785	Glycolysis Pathway D (2)	Wikipathways	WP4277	HK2; HK1; ALDOA; ALDOC; PGK2; PGK1	230; 5230; 5232; 226; 3098; 3099	23	23
	0.00841537	0.0287785	TLR ECSIT MEKK1 p38	INOH	None	TOLLIP; MAP2K1; MAP2K2; CD14; LY96; MYD88	929; 23643; 4615; 5605; 54472; 5604	23	23
	0.00841537	0.0287785	Estrogen signaling pathway	Wikipathways	WP712	GNAS; GNB1; MAP2K1; IKBKG; NFKB1; MAPK9	2778; 5604; 5601; 2782; 8517; 4790	23	23
	0.00841537	0.0287785	Thromboxane signalling through TP receptor	Reactome	R-HSA-428930	GNAQ; GNB4; GNB1; GNB2; GNA14; GNA13	59345; 2776; 9630; 2783; 2782; 10672	23	23
	0.00876204	0.0297028	2,-deoxy-&alpha;-D-ribose 1-phosphate degradation	HumanCyc	PWY-7180	ALDH3B2; ALDH3B1; ALDH3A1	218; 222; 221	6	6
	0.00876204	0.0297028	AUF1 (hnRNP D0) binds and destabilizes mRNA	Reactome	R-HSA-450408	EIF4G1; HSPA8; HSPB1	3315; 3312; 1981	6	6
	0.00876204	0.0297028	basic mechanisms of sumoylation	BioCarta	sumopathway	UBE2I; SUMO1; SUMO2	6613; 7329; 7341	6	6
	0.00876204	0.0297028	methionine degradation	HumanCyc	METHIONINE-DEG1-PWY	AHCY; AHCYL1; AHCYL2	10768; 191; 23382	6	6
	0.00876608	0.0297028	Constitutive Signaling by Aberrant PI3K in Cancer	Reactome	R-HSA-2219530	ERBB2; SRC; PDGFRA; ERBB4; PIK3CD; FYN; KIT; MET; GRB2; PIK3R3; EGFR; PIK3AP1	3815; 118788; 6714; 2534; 5293; 5156; 2885; 2064; 1956; 2066; 8503; 4233	69	69
	0.00876608	0.0297028	COPII-mediated vesicle transport	Reactome	R-HSA-204005	BET1; SEC23A; TFG; CTSC; TRAPPC4; YKT6; NAPG; SEC24D; CTSZ; LMAN1; ANKRD28; TMED10	8774; 3998; 10972; 10484; 1075; 10342; 9871; 1522; 10652; 51399; 10282; 23243	69	69
	0.00878152	0.0297097	Colorectal cancer - Homo sapiens (human)	KEGG	path:hsa05210	RAC2; RAC3; RAC1; EGFR; PIK3CD; BAX; MAP2K2; APPL1; MAP2K1; GRB2; PIK3R3; MAPK9; RALA; SOS2	581; 5293; 5879; 5880; 5881; 5898; 8503; 2885; 1956; 26060; 5601; 5604; 5605; 6655	86	86
	0.00885053	0.0298975	Processive synthesis on the C-strand of the telomere	Reactome	R-HSA-174414	PCNA; FEN1; RPA1; RPA2	6118; 6117; 2237; 5111	11	11
	0.00892276	0.0300499	Class I PI3K signaling events	PID	pi3kcipathway	SRC; HCK; RAC1; FYN; ADAP1; PDPK1; HSP90AA1; LYN; YES1	4067; 6714; 2534; 3320; 11033; 7525; 5170; 3055; 5879	45	45
	0.00892276	0.0300499	PDGF	INOH	None	PDGFRA; SOS2; ARHGEF6; PIK3CD; MAP2K2; MAP2K1; GRB2; PDPK1; PAK1	5170; 5293; 5156; 9459; 2885; 5605; 6655; 5604; 5058	45	45
	0.00903358	0.030377	G2/M DNA damage checkpoint	Reactome	R-HSA-69473	YWHAZ; SUMO1; H2AFX; YWHAQ; RPA1; RFC2; SFN; YWHAH; HIST1H2BA; RFC4; YWHAB; UBE2V2; RPA2; YWHAG; NBN	255626; 6118; 5982; 6117; 7529; 7532; 3014; 10971; 7336; 2810; 4683; 7341; 7534; 5984; 7533	96	95
	0.00911899	0.0305714	Apoptosis-related network due to altered Notch3 in ovarian cancer	Wikipathways	WP2864	HDAC1; HSPA5; HSPB1; NFKB1; THBS1; HSPD1; SERBP1; CUL5; VIM; YBX3	3309; 3065; 3329; 3315; 7057; 26135; 7431; 8065; 8531; 4790	53	53
	0.00911899	0.0305714	Signaling events mediated by PTP1B	PID	ptp1bpathway	SRC; STAT3; CSK; EGFR; FYN; GRB2; HCK; LYN; YBX1; YES1	4067; 1445; 1956; 3055; 6714; 2534; 2885; 4904; 7525; 6774	53	53
	0.00916292	0.0306723	C-type lectin receptor signaling pathway - Homo sapiens (human)	KEGG	path:hsa04625	SRC; PPP3R1; STAT1; CASP1; CALML3; PIK3CD; PRKCD; CASP8; PYCARD; CARD9; PIK3R3; IKBKG; PPP3CA; NFKB1; MAPK9; PAK1	6714; 6772; 64170; 5293; 4790; 810; 8503; 834; 8517; 841; 5530; 5534; 29108; 5058; 5580; 5601	104	104
	0.00931016	0.0308756	TCF dependent signaling in response to WNT	Reactome	R-HSA-201681	HDAC1; RPS27A; HIST1H2AK; HIST1H2AJ; HIST1H2AE; HIST1H2AD; HIST1H2AC; HIST1H2AB; YWHAZ; RUVBL1; CSNK2A2; HIST2H2AA3; HIST2H2AA4; TRRAP; HIST1H2BA; HIST2H2AC; H2AFV; H2AFX; H2AFZ; UBA52; UBB; UBC; RBX1; CSNK2B; H2AFJ	3065; 723790; 8330; 1460; 3014; 7534; 7314; 1459; 3013; 55766; 9978; 8295; 7311; 3012; 8335; 8338; 255626; 8337; 8331; 7316; 8607; 8334; 3015; 6233; 94239	190	188
	0.00932119	0.0308756	ucalpain and friends in cell spread	BioCarta	ucalpainpathway	SRC; ACTA1; CAPNS1; PXN; RAC1	826; 58; 5829; 5879; 6714	17	17
	0.00932119	0.0308756	IL-9 Signaling Pathway	Wikipathways	WP22	MAP2K2; MAP2K1; GRB2; STAT3; STAT1	2885; 6774; 6772; 5605; 5604	17	17
	0.00932119	0.0308756	Formation of Senescence-Associated Heterochromatin Foci (SAHF)	Reactome	R-HSA-2559584	HIST1H1D; HIST1H1E; LMNB1; HIST1H1B; HIST1H1C	3008; 3009; 4001; 3006; 3007	17	17
	0.00932119	0.0308756	Assembly Of The HIV Virion	Reactome	R-HSA-175474	UBA52; RPS27A; UBB; PPIA; UBC	7316; 7311; 5478; 7314; 6233	17	17
	0.00932119	0.0308756	ABC transporter disorders	Reactome	R-HSA-5619084	UBA52; RPS27A; ERLEC1; UBB; UBC	7316; 7311; 7314; 6233; 27248	17	17
	0.00932119	0.0308756	Disorders of transmembrane transporters	Reactome	R-HSA-5619115	UBA52; RPS27A; ERLEC1; UBB; UBC	7316; 7311; 7314; 6233; 27248	17	17
	0.00969285	0.0319253	Ion channel transport	Reactome	R-HSA-983712	ATP6V1F; ATP2A1; ATP2A2; ATP2A3; RPS27A; ATP11C; ATP13A1; ATP6AP1; ATP6V0D1; UBB; CAMK2D; TSC22D3; SRI; CAMK2A; ATP12A; ATP2B3; ATP4A; UBA52; ATP1A4; ATP1A2; ATP1A1; UBC; ATP6V1C2; ATP6V1C1	492; 6717; 815; 488; 7316; 476; 495; 528; 817; 9296; 286410; 537; 479; 7311; 1831; 480; 7314; 57130; 9114; 487; 489; 245973; 6233; 477	179	179
	0.00971013	0.0319253	MyD88 cascade initiated on plasma membrane	Reactome	R-HSA-975871	MAPK9; HMGB1; RPS27A; UBA52; MAP2K1; TMEM189-UBE2V1; IKBKG; UBB; UBC; NFKB1; MYD88; MAPKAPK3; TAB1; UBE2V1	4790; 4615; 5601; 5604; 387522; 8517; 7311; 7314; 7867; 3146; 10454; 7316; 7335; 6233	87	87
	0.00971013	0.0319253	Toll Like Receptor 10 (TLR10) Cascade	Reactome	R-HSA-168142	MAPK9; HMGB1; RPS27A; UBA52; MAP2K1; TMEM189-UBE2V1; IKBKG; UBB; UBC; NFKB1; MYD88; MAPKAPK3; TAB1; UBE2V1	4790; 4615; 5601; 5604; 387522; 8517; 7311; 7314; 7867; 3146; 10454; 7316; 7335; 6233	87	87
	0.00971013	0.0319253	Toll Like Receptor 5 (TLR5) Cascade	Reactome	R-HSA-168176	MAPK9; HMGB1; RPS27A; UBA52; MAP2K1; TMEM189-UBE2V1; IKBKG; UBB; UBC; NFKB1; MYD88; MAPKAPK3; TAB1; UBE2V1	4790; 4615; 5601; 5604; 387522; 8517; 7311; 7314; 7867; 3146; 10454; 7316; 7335; 6233	87	87
	0.00971013	0.0319253	G alpha (12/13) signalling events	Reactome	R-HSA-416482	RAC2; SOS2; RAC1; ARHGEF6; GNB4; GNB1; ROCK1; ROCK2; GNB2; GNA12; GNA13; PIK3R3; RHOG; AKAP13	5879; 2782; 10672; 6655; 2768; 391; 9459; 2783; 59345; 8503; 11214; 5880; 6093; 9475	89	87
	0.00977281	0.0320462	TGF-beta Signaling Pathway	Wikipathways	WP366	UBE2I; SRC; MET; SUMO1; TAB1; TRAP1; ROCK1; THBS1; MAP2K2; PML; MAP2K1; GRB2; STRAP; PDK1; RAC1; NUP214; RBX1; MAPK9; HDAC1	7329; 6714; 5371; 7057; 6093; 8021; 4233; 10454; 5605; 5604; 5601; 10131; 2885; 5879; 7341; 9978; 3065; 11171; 5163	132	132
	0.00980475	0.0320462	MAP2K and MAPK activation	Reactome	R-HSA-5674135	SRC; APBB1IP; CSK; MAP2K2; MAP2K1; MARK3; YWHAB; IQGAP1	1445; 54518; 5604; 6714; 4140; 5605; 7529; 8826	38	38
	0.00980475	0.0320462	Apoptotic cleavage of cellular proteins	Reactome	R-HSA-111465	LMNB1; DBNL; PRKCD; CASP8; ROCK1; STK24; PLEC; VIM	4001; 8428; 7431; 841; 6093; 5580; 5339; 28988	38	38
	0.00980475	0.0320462	Striated Muscle Contraction Pathway	Wikipathways	WP383	ACTA2; ACTA1; ACTG1; ACTC1; DES; TPM3; VIM; TTN	7170; 7431; 1674; 71; 70; 7273; 59; 58	38	38
	0.00982364	0.0320607	SUMOylation of chromatin organization proteins	Reactome	R-HSA-4551638	UBE2I; HDAC1; NUP107; SUMO1; SUMO2; NUP93; NUP37; NUP155; NUP214; NUP210; NUP205; RANBP2	7329; 9688; 3065; 23165; 7341; 5903; 23225; 6613; 57122; 8021; 79023; 9631	70	70
	0.00992593	0.0323143	RHO GTPases Activate Formins	Reactome	R-HSA-5663220	SRC; DYNLL1; ACTG1; BUB3; NUP107; MAD1L1; CENPF; AHCTF1; RANGAP1; NUP37; RAC1; PFN1; PFN2; DYNC1LI2; ACTB; KIF2A; ZW10; RANBP2	25909; 5217; 1063; 57122; 1783; 3796; 6714; 5879; 5903; 5216; 79023; 60; 8655; 5905; 9183; 8379; 9184; 71	123	123
	0.00993053	0.0323143	p75 NTR receptor-mediated signalling	Reactome	R-HSA-193704	HDAC1; RPS27A; SOS2; RAC1; ARHGEF6; MAGED1; UBC; UBA52; AATF; GNA13; UBB; ARHGDIA; NFKB1; MYD88; AKAP13	3065; 9500; 4790; 4615; 5879; 10672; 6655; 9459; 7311; 7314; 11214; 396; 7316; 26574; 6233	99	96
