# Supplementary figures and images for: A Proteogenomic Atlas of Clear Cell Renal Cell Carcinoma in a Chinese Population
Source: Research Square preprint supplement (doi:10.21203/rs.3.rs-221123/v1), 2021-02-26

# Figure S4

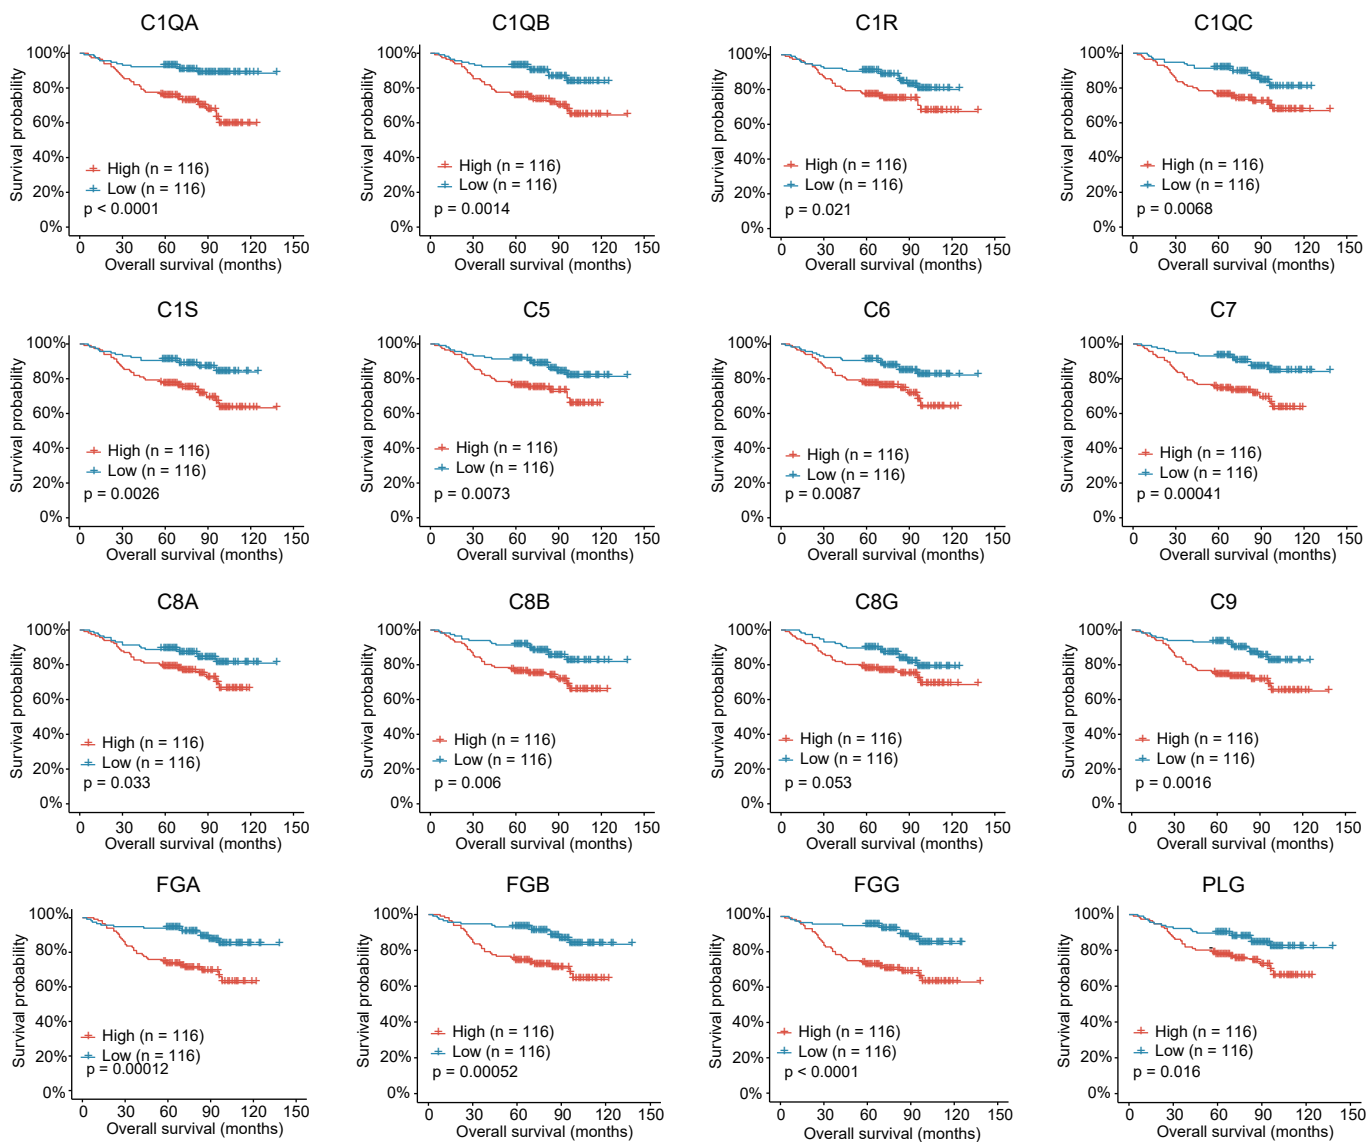

Supplement: Supplementary file 1 [file 95417d5c3125d0c87e3abdf5.pdf]
